# Supplementary material for: Transcriptional pathobiology and multi-omics predictors for Parkinson’s disease
Source: bioRxiv preprint, doi:10.1101/2024.06.18.599639, version 1 (2024-06-21)
Supplement: Table S1 [file 599639_file12.xlsx]

## Sheet: DE results in PPMI
	baseMean	log2FoldChange	lfcSE	stat	pvalue	padj	FoldChange	symbol	geneType	baseMean_raw.Control	baseMean_raw.Case
ENSG00000205537.2	13.9883	0.186812	0.0275675	6.77651	1.23116e-11	3.47717e-07	1.13825	AC121338.1	antisense	12.9748	15.3557
ENSG00000271554.1	7.39759	0.221667	0.0380399	5.82722	5.63579e-09	7.95858e-05	1.16608	AL138787.2	antisense	6.90389	8.16697
ENSG00000176076.7	12.1341	0.306688	0.054208	5.6576	1.535e-08	9.26093e-05	1.23686	KCNE5	protein_coding	10.6568	13.3612
ENSG00000138411.12	672.525	0.184044	0.0325956	5.64629	1.63951e-08	9.26093e-05	1.13606	HECW2	protein_coding	623.423	742
ENSG00000274068.1	14.3365	-0.150319	0.0266145	-5.64802	1.62308e-08	9.26093e-05	0.901051	AL449266.1	protein_coding	15.5355	14.274
ENSG00000152463.14	53.0881	0.241693	0.0430639	5.61243	1.99509e-08	9.39122e-05	1.18238	OLAH	protein_coding	46.222	59.7623
ENSG00000244436.2	7.59452	0.203141	0.0374888	5.41872	6.00283e-08	0.000242197	1.1512	AC023050.1	processed_pseudogene	7.02059	8.35572
ENSG00000274677.1	33.809	-0.0920312	0.017198	-5.35128	8.73353e-08	0.000308326	0.938201	AC040169.3	sense_intronic	36.0114	35.1234
ENSG00000093134.14	3371.37	0.198863	0.0374492	5.31022	1.09496e-07	0.00034361	1.14779	VNN3	protein_coding	3100.65	3776.6
ENSG00000270544.1	13.6396	0.14435	0.0273973	5.26877	1.37344e-07	0.000387902	1.10523	AC008555.3	lincRNA	12.373	15.7477
ENSG00000255421.1	29.4314	0.0981925	0.0187222	5.24471	1.5653e-07	0.000401898	1.07043	AP002340.1	antisense	27.8009	32.4537
ENSG00000188690.13	736.572	-0.0629476	0.0123335	-5.10378	3.32939e-07	0.000665909	0.957306	UROS	protein_coding	755.538	759.236
ENSG00000260583.1	35.9557	-0.0857774	0.0168296	-5.09682	3.45411e-07	0.000665909	0.942277	LINC00515	antisense	38.2929	36.6407
ENSG00000235119.1	33.0097	0.0903787	0.017748	5.09234	3.53667e-07	0.000665909	1.06465	AL138895.1	lincRNA	31.6362	35.7368
ENSG00000196741.5	63.9655	-0.064747	0.0126226	-5.12944	2.9061e-07	0.000665909	0.956113	LINC01560	lincRNA	66.8558	65.8784
ENSG00000186792.16	51.5677	-0.17562	0.034578	-5.07895	3.79531e-07	0.000669943	0.885387	HYAL3	protein_coding	53.6018	50.6534
ENSG00000183666.16	441.099	-0.124309	0.0245997	-5.05326	4.34342e-07	0.000721595	0.917444	GUSBP1	transcribed_unprocessed_pseudogene	470.076	444.791
ENSG00000139890.9	268.862	0.164106	0.0330349	4.96766	6.77651e-07	0.00106327	1.12047	REM2	protein_coding	247.311	303.316
ENSG00000103154.9	36.8716	0.266539	0.0537833	4.95579	7.20376e-07	0.00107082	1.20292	NECAB2	protein_coding	31.9703	40.8893
ENSG00000281162.2	924.573	0.202705	0.0415764	4.87549	1.08541e-06	0.00150352	1.15085	LINC01127	lincRNA	853.872	1047.33
ENSG00000259318.1	41.3657	-0.075994	0.0156352	-4.86045	1.17117e-06	0.00150352	0.948688	AL356801.1	processed_pseudogene	43.1991	42.9492
ENSG00000266126.1	42.7867	0.0754377	0.015495	4.86853	1.1243e-06	0.00150352	1.05368	AC005730.3	sense_intronic	41.7941	46.6915
ENSG00000237261.2	10.6405	0.152774	0.0315933	4.83563	1.32721e-06	0.00162976	1.1117	RF00017	misc_RNA	9.87414	11.5681
ENSG00000244242.1	81.2348	0.184263	0.0387201	4.75885	1.94698e-06	0.00229119	1.13624	IFITM10	protein_coding	72.0023	89.9728
ENSG00000067836.12	576.131	-0.179399	0.0379676	-4.72506	2.30045e-06	0.00232596	0.883071	ROGDI	protein_coding	600.362	559.815
ENSG00000275401.1	37.3217	-0.0775123	0.0164655	-4.70756	2.50705e-06	0.00232596	0.94769	AL391095.3	lincRNA	38.6751	38.726
ENSG00000200855.1	12.5549	-0.132699	0.0282108	-4.70385	2.55302e-06	0.00232596	0.912123	RF00019	misc_RNA	13.4211	12.9365
ENSG00000114737.15	522.227	-0.159861	0.0339604	-4.70727	2.51051e-06	0.00232596	0.895111	CISH	protein_coding	555.568	528.319
ENSG00000272810.1	11.9958	0.138712	0.0294474	4.7105	2.47113e-06	0.00232596	1.10092	U91328.3	lincRNA	11.4668	13.1343
ENSG00000136840.18	365.702	-0.238277	0.0502338	-4.74337	2.10191e-06	0.00232596	0.847757	ST6GALNAC4	protein_coding	380.67	347.891
ENSG00000111490.13	237.168	0.135115	0.0286611	4.71421	2.42648e-06	0.00232596	1.09818	TBC1D30	protein_coding	222.318	261.67
ENSG00000057704.12	3252.7	0.143564	0.0305926	4.69276	2.69537e-06	0.00237892	1.10463	TMCC3	protein_coding	3049.68	3631.58
ENSG00000111261.13	650.395	0.146395	0.0313054	4.67633	2.92051e-06	0.002426	1.1068	MANSC1	protein_coding	606.499	722.354
ENSG00000189134.3	53.1887	0.182083	0.0389102	4.67957	2.87481e-06	0.002426	1.13452	NKAPL	protein_coding	50.508	57.6515
ENSG00000100116.16	163.978	-0.30007	0.0647722	-4.63269	3.60943e-06	0.00261569	0.812213	GCAT	protein_coding	180.078	148.757
ENSG00000134779.14	2138.31	-0.0876776	0.0189489	-4.62706	3.70894e-06	0.00261569	0.941036	TPGS2	protein_coding	2208.68	2185.14
ENSG00000139112.10	3331.94	0.120328	0.026126	4.60566	4.11157e-06	0.00261569	1.08698	GABARAPL1	protein_coding	3173.67	3648.09
ENSG00000249392.1	10.7408	0.14643	0.0314775	4.65189	3.28906e-06	0.00261569	1.10683	AC096588.1	lincRNA	9.73227	11.7405
ENSG00000236345.1	209.147	0.140207	0.0303242	4.6236	3.77134e-06	0.00261569	1.10206	AL354719.2	antisense	197.499	227.702
ENSG00000011198.9	7101.21	0.150674	0.0327676	4.59827	4.26023e-06	0.00261569	1.11009	ABHD5	protein_coding	6696.99	7870.3
ENSG00000189337.16	225.928	0.249114	0.054037	4.61007	4.02543e-06	0.00261569	1.18848	KAZN	protein_coding	197.263	252.203
ENSG00000171865.9	411.556	-0.0519712	0.0112449	-4.62178	3.80462e-06	0.00261569	0.964617	RNASEH1	protein_coding	425.593	426.274
ENSG00000135378.3	1379.68	0.161277	0.0350502	4.60132	4.19827e-06	0.00261569	1.11828	PRRG4	protein_coding	1279.7	1532.13
ENSG00000143486.15	877.601	-0.0665676	0.0144395	-4.6101	4.02467e-06	0.00261569	0.954907	EIF2D	protein_coding	924.572	899.358
ENSG00000146122.16	209.399	0.373384	0.0803661	4.64604	3.38362e-06	0.00261569	1.29539	DAAM2	protein_coding	167.854	249.528
ENSG00000253981.5	250.443	0.180813	0.0390951	4.62496	3.74666e-06	0.00261569	1.13352	ALG1L13P	transcribed_unprocessed_pseudogene	231.668	276.837
ENSG00000234034.1	55.4068	0.062095	0.0136008	4.56555	4.98189e-06	0.00293132	1.04398	AP000959.1	lincRNA	54.5423	59.9383
ENSG00000110911.15	1329.36	-0.0575457	0.012594	-4.56931	4.89338e-06	0.00293132	0.960897	SLC11A2	protein_coding	1373.03	1380.17
ENSG00000188158.15	429.187	0.135601	0.0298557	4.54187	5.57563e-06	0.00321372	1.09855	NHS	protein_coding	407.581	475.742
ENSG00000174007.7	871.131	0.150091	0.0331786	4.52374	6.07552e-06	0.00323756	1.10964	CEP19	protein_coding	827.018	947.826
ENSG00000102010.14	249.434	0.228599	0.0504978	4.5269	5.98542e-06	0.00323756	1.1717	BMX	protein_coding	224.137	282.588
ENSG00000246016.2	77.2729	0.147665	0.0325968	4.53005	5.89692e-06	0.00323756	1.10778	LINC01513	antisense	70.8558	87.4446
ENSG00000253519.1	41.3455	0.13053	0.0287968	4.53282	5.82014e-06	0.00323756	1.0947	AC106801.1	antisense	38.984	45.2468
ENSG00000223819.2	34.6738	0.141414	0.0313408	4.51212	6.41815e-06	0.00326111	1.10299	PPIAP89	processed_pseudogene	32.746	39.1234
ENSG00000166130.14	1426.42	0.157976	0.0350085	4.51248	6.40726e-06	0.00326111	1.11572	IKBIP	protein_coding	1342.32	1562.32
ENSG00000204323.5	698.533	-0.227449	0.050468	-4.50679	6.58158e-06	0.00326111	0.854144	SMIM5	protein_coding	739.371	651.377
ENSG00000212743.2	625.468	0.176592	0.0391718	4.50813	6.54008e-06	0.00326111	1.13021	AL137145.1	lincRNA	584.51	701.57
ENSG00000132819.16	8109.08	-0.24383	0.0542979	-4.4906	7.10228e-06	0.00339982	0.8445	RBM38	protein_coding	8663.14	7605.13
ENSG00000181016.9	314.604	0.144128	0.0320744	4.49356	7.00415e-06	0.00339982	1.10506	LSMEM1	protein_coding	297.181	346.058
ENSG00000171049.8	6651.08	0.167226	0.0374066	4.4705	7.80363e-06	0.00349838	1.1229	FPR2	protein_coding	6248.92	7391.3
ENSG00000241868.3	34.1617	0.0774928	0.017297	4.48012	7.46002e-06	0.00349838	1.05518	RN7SL434P	misc_RNA	33.3089	37.6733
ENSG00000115590.13	2425.17	0.173579	0.038803	4.47335	7.70028e-06	0.00349838	1.12785	IL1R2	protein_coding	2254.71	2728.41
ENSG00000238719.1	29.8528	-0.0822741	0.0183936	-4.47297	7.71399e-06	0.00349838	0.944568	RNU7-96P	snRNA	31.2334	31.0054
ENSG00000231933.7	54.988	0.211655	0.0475467	4.45151	8.52667e-06	0.00361853	1.15802	Z98949.1	antisense	48.4874	60.4719
ENSG00000108582.11	9120.26	0.123096	0.0276615	4.45007	8.58413e-06	0.00361853	1.08907	CPD	protein_coding	8624.1	10082.5
ENSG00000272829.1	12.8643	-0.126563	0.0284067	-4.45537	8.37489e-06	0.00361853	0.916011	AC002470.1	lincRNA	13.7506	12.5953
ENSG00000225873.4	169.689	0.169332	0.0379844	4.45793	8.27562e-06	0.00361853	1.12454	C3orf86	transcribed_unitary_pseudogene	158.888	189.301
ENSG00000258922.1	50.9266	0.135243	0.0304295	4.44447	8.81084e-06	0.00365948	1.09828	AC106028.2	sense_intronic	48.6751	55.7005
ENSG00000262265.2	155.443	0.0358934	0.00810127	4.43058	9.39779e-06	0.00384669	1.02519	AC002558.3	sense_intronic	153.551	167.75
ENSG00000159335.15	190.671	-0.227503	0.0514753	-4.41966	9.88575e-06	0.00398862	0.854112	PTMS	protein_coding	202.174	174.701
ENSG00000230257.2	234.604	0.187989	0.04266	4.40667	1.0497e-05	0.00411761	1.13917	NFE4	protein_coding	215.034	260.034
ENSG00000254812.1	34.5018	0.0762938	0.0173123	4.40691	1.04858e-05	0.00411761	1.05431	AC067930.3	antisense	33.4371	37.323
ENSG00000238243.3	367.719	-0.288571	0.0656172	-4.39779	1.0936e-05	0.00423104	0.818713	OR2W3	protein_coding	396.741	344.853
ENSG00000254928.1	32.2274	0.159212	0.0362318	4.39427	1.11145e-05	0.00424198	1.11668	AP001372.3	antisense	29.5584	35.9292
ENSG00000235051.3	12.8255	0.125936	0.0287036	4.38745	1.14689e-05	0.0043189	1.09122	AL357497.1	antisense	12.0366	13.8348
ENSG00000276136.1	375.182	0.0948821	0.0216759	4.37732	1.2015e-05	0.004407	1.06798	AC016957.2	lincRNA	363.442	407.911
ENSG00000048140.17	563.825	-0.0904908	0.0206725	-4.37736	1.20125e-05	0.004407	0.939203	TSPAN17	protein_coding	581.318	576.944
ENSG00000163083.5	36.2895	0.247506	0.056596	4.37321	1.22433e-05	0.00443318	1.18715	INHBB	protein_coding	31.2677	40.7641
ENSG00000249637.1	41.516	-0.0686712	0.0157276	-4.36628	1.2638e-05	0.00451816	0.953516	AC008438.1	antisense	43.5309	42.1996
ENSG00000257878.1	345.501	0.16541	0.0382205	4.32777	1.50625e-05	0.00531762	1.12148	AC007298.2	antisense	325.362	381.662
ENSG00000277463.1	17.1954	0.105441	0.024452	4.31215	1.61674e-05	0.00534234	1.07582	AC080038.2	lincRNA	16.611	18.8675
ENSG00000171552.12	13643.3	-0.234045	0.0542928	-4.31079	1.62674e-05	0.00534234	0.850248	BCL2L1	protein_coding	14290.2	13032.6
ENSG00000103569.9	15106.4	0.152079	0.0352229	4.31763	1.57713e-05	0.00534234	1.11117	AQP9	protein_coding	14064.7	16717
ENSG00000134873.9	796.492	0.12637	0.0292501	4.32033	1.55799e-05	0.00534234	1.09154	CLDN10	protein_coding	758.378	872.708
ENSG00000113719.15	5758.64	0.118501	0.0274697	4.31387	1.60421e-05	0.00534234	1.08561	ERGIC1	protein_coding	5443.19	6407.41
ENSG00000207698.1	11.6731	-0.126965	0.0293787	-4.32167	1.54854e-05	0.00534234	0.915756	MIR32	miRNA	12.5904	11.9419
ENSG00000188895.11	9364.49	0.108579	0.0252116	4.30669	1.65715e-05	0.00537965	1.07817	MSL1	protein_coding	9009.11	10276.4
ENSG00000179299.16	329.293	0.149428	0.0348267	4.29062	1.78177e-05	0.00571847	1.10913	NSUN7	protein_coding	307.769	365.539
ENSG00000176788.8	6547.56	0.167898	0.0393149	4.27059	1.94957e-05	0.00605073	1.12342	BASP1	protein_coding	5938.76	7443.87
ENSG00000115137.11	223.38	-0.0645633	0.015112	-4.27233	1.93444e-05	0.00605073	0.956235	DNAJC27	protein_coding	231.375	232.479
ENSG00000214293.8	198.21	0.0768225	0.0179854	4.27138	1.9427e-05	0.00605073	1.05469	APTR	lincRNA	192.206	213.123
ENSG00000166446.14	342.66	-0.0751761	0.0176248	-4.26537	1.99573e-05	0.00612668	0.949226	CDYL2	protein_coding	349.803	357.831
ENSG00000258137.5	13.1178	0.120223	0.0282325	4.25831	2.05979e-05	0.00625534	1.0869	AC079313.2	antisense	12.3982	14.343
ENSG00000151726.13	28900.1	0.17396	0.0408756	4.25585	2.08255e-05	0.00625716	1.12815	ACSL1	protein_coding	26750.3	32377.7
ENSG00000112096.17	76782.4	0.126933	0.0298491	4.2525	2.11395e-05	0.00628466	1.09197	SOD2	protein_coding	72090.3	84280.4
ENSG00000130159.13	212.339	-0.123855	0.0291638	-4.24688	2.16764e-05	0.00637716	0.917732	ECSIT	protein_coding	218.771	210.996
ENSG00000256269.8	222.036	-0.166694	0.0393381	-4.23746	2.26065e-05	0.00656737	0.890882	HMBS	protein_coding	229.84	212.826
ENSG00000148187.17	653.609	-0.0475125	0.0112173	-4.23566	2.2788e-05	0.00656737	0.967603	MRRF	protein_coding	678.336	679.688
ENSG00000137266.14	264.333	-0.160342	0.0378932	-4.23142	2.32219e-05	0.00662481	0.894813	SLC22A23	protein_coding	275.693	251.289
ENSG00000264701.1	62.6103	0.105559	0.0250355	4.21639	2.48247e-05	0.00670643	1.07591	AC018521.4	antisense	60.4691	68.2777
ENSG00000277371.1	58.5082	0.112636	0.0267141	4.21636	2.48274e-05	0.00670643	1.0812	RF00017	misc_RNA	55.8078	63.8693
ENSG00000038219.12	14449.2	0.0997079	0.0236438	4.21708	2.47481e-05	0.00670643	1.07156	BOD1L1	protein_coding	14052.2	15766.6
ENSG00000235749.2	79.639	0.11844	0.028087	4.2169	2.47679e-05	0.00670643	1.08556	AL390860.1	antisense	75.286	87.6679
ENSG00000285931.1	13.4505	0.116901	0.0277029	4.21983	2.44486e-05	0.00670643	1.0844	AC005495.1	antisense	12.9268	14.8149
ENSG00000112303.13	19408.5	0.181023	0.0429432	4.21541	2.49327e-05	0.00670643	1.13369	VNN2	protein_coding	17914.3	21316.2
ENSG00000179632.9	3800.41	-0.164151	0.0390235	-4.20647	2.59385e-05	0.0068482	0.892453	MAF1	protein_coding	3966.73	3730.42
ENSG00000113368.11	1896.81	0.154325	0.0366879	4.20642	2.59447e-05	0.0068482	1.1129	LMNB1	protein_coding	1755.08	2096.07
ENSG00000184792.15	1483.15	-0.245855	0.0587022	-4.18818	2.81204e-05	0.00712551	0.843316	OSBP2	protein_coding	1551.59	1409.18
ENSG00000130821.15	946.956	-0.271245	0.0648049	-4.18556	2.84468e-05	0.00712551	0.828604	SLC6A8	protein_coding	992.034	904.61
ENSG00000181788.3	4284.79	-0.220674	0.0526846	-4.18859	2.80696e-05	0.00712551	0.858164	SIAH2	protein_coding	4538.57	4008.82
ENSG00000010318.20	210.891	-0.0557706	0.01331	-4.19012	2.78805e-05	0.00712551	0.96208	PHF7	protein_coding	215.05	217.733
ENSG00000119723.16	525.937	-0.0503608	0.0120335	-4.18506	2.85091e-05	0.00712551	0.965695	COQ6	protein_coding	547.87	544.49
ENSG00000173281.4	4843.81	0.133662	0.0319039	4.18951	2.79553e-05	0.00712551	1.09707	PPP1R3B	protein_coding	4603.12	5320.82
ENSG00000233527.8	106.9	-0.0407276	0.00977833	-4.16509	3.11231e-05	0.00754598	0.972165	ZNF529-AS1	antisense	108.524	111.35
ENSG00000275527.1	27.0699	-0.265335	0.0638665	-4.15453	3.2596e-05	0.00754598	0.832006	AC100835.2	lincRNA	27.5172	25.8312
ENSG00000281883.1	10.3239	-0.130133	0.0313172	-4.15531	3.24842e-05	0.00754598	0.913747	AL512506.3	protein_coding	10.627	10.5499
ENSG00000051620.10	4290.59	0.0927207	0.0223097	4.15607	3.2377e-05	0.00754598	1.06638	HEBP2	protein_coding	4175.62	4654.08
ENSG00000163235.15	934.963	0.137266	0.0330048	4.15899	3.19664e-05	0.00754598	1.09982	TGFA	protein_coding	895.172	1013.99
ENSG00000114054.13	558.842	-0.0435984	0.0104652	-4.16604	3.09931e-05	0.00754598	0.970232	PCCB	protein_coding	574.048	580.367
ENSG00000277771.1	32.3085	0.0745265	0.0178877	4.16635	3.09513e-05	0.00754598	1.05302	RF00017	misc_RNA	31.2082	34.9619
ENSG00000272021.1	19.14	0.266269	0.0639872	4.16129	3.16458e-05	0.00754598	1.20269	AC008592.5	lincRNA	16.9039	21.4428
ENSG00000183597.15	2342.51	-0.151569	0.0363997	-4.16403	3.1268e-05	0.00754598	0.900271	TANGO2	protein_coding	2384.63	2320.97
ENSG00000256229.7	869.354	0.0977164	0.0235441	4.15035	3.31966e-05	0.00762252	1.07008	ZNF486	protein_coding	856.867	933.318
ENSG00000262001.1	244.922	0.0851483	0.0206338	4.12664	3.68103e-05	0.00775845	1.0608	DLGAP1-AS2	antisense	235.714	268.503
ENSG00000063854.12	5550.87	-0.20723	0.0501908	-4.12884	3.64597e-05	0.00775845	0.866199	HAGH	protein_coding	5808.2	5249.8
ENSG00000189067.12	16100.3	0.128372	0.031014	4.13915	3.48598e-05	0.00775845	1.09306	LITAF	protein_coding	15463.7	17718.9
ENSG00000177873.12	543.657	-0.0447075	0.0108019	-4.13884	3.49065e-05	0.00775845	0.969486	ZNF619	protein_coding	558.057	568.661
ENSG00000136630.12	573.201	0.129484	0.0313637	4.12847	3.65186e-05	0.00775845	1.0939	HLX	protein_coding	539.686	634.57
ENSG00000236785.1	7.71653	0.151709	0.0366808	4.13591	3.53553e-05	0.00775845	1.11088	SDR42E1P5	processed_pseudogene	7.18535	8.57895
ENSG00000165046.12	275.655	0.0940034	0.0227102	4.13926	3.48432e-05	0.00775845	1.06733	LETM2	protein_coding	264.222	297.799
ENSG00000254328.1	23.322	0.0873649	0.0211586	4.12904	3.64281e-05	0.00775845	1.06243	AC008429.4	processed_pseudogene	22.9405	24.7877
ENSG00000272853.1	43.069	-0.0637238	0.0154369	-4.12802	3.65895e-05	0.00775845	0.956791	AC069544.1	lincRNA	44.7849	44.0907
ENSG00000146955.10	21.6323	0.0905923	0.0219343	4.13017	3.62491e-05	0.00775845	1.06481	RAB19	protein_coding	21.2449	23.4047
ENSG00000259225.6	54.7994	0.145766	0.0353033	4.12896	3.64406e-05	0.00775845	1.10632	LINC02345	lincRNA	50.8398	60.0127
ENSG00000140563.14	10429.9	0.114926	0.0278827	4.12175	3.7601e-05	0.00786642	1.08292	MCTP2	protein_coding	10029.6	11476
ENSG00000065600.12	485.251	-0.0656781	0.0159571	-4.11592	3.85641e-05	0.0078925	0.955496	TMEM206	protein_coding	509.659	498.73
ENSG00000223878.1	133.287	0.113944	0.0276794	4.11658	3.84543e-05	0.0078925	1.08218	PPIAP53	processed_pseudogene	127.352	144.971
ENSG00000244361.1	10.4918	0.236256	0.0573848	4.11705	3.83753e-05	0.0078925	1.17793	RPL30P7	processed_pseudogene	9.36156	11.8675
ENSG00000100218.11	34.8851	0.1979	0.0481203	4.11261	3.91213e-05	0.00794895	1.14703	RSPH14	protein_coding	31.4005	38.8838
ENSG00000105610.5	1494.36	-0.245115	0.0596565	-4.10877	3.97781e-05	0.0079975	0.843749	KLF1	protein_coding	1614.3	1372.77
ENSG00000168495.12	458.803	-0.0635873	0.0154793	-4.1079	3.99266e-05	0.0079975	0.956882	POLR3D	protein_coding	477.611	476.824
ENSG00000104892.16	475.013	-0.227334	0.0554086	-4.10287	4.08057e-05	0.00811601	0.854212	KLC3	protein_coding	493.281	450.477
ENSG00000160588.9	5090.71	0.122732	0.0299646	4.09589	4.20542e-05	0.00830586	1.08879	MPZL3	protein_coding	4858.16	5554.77
ENSG00000114021.11	767.483	-0.0567658	0.0138688	-4.09306	4.25717e-05	0.00834967	0.961417	NIT2	protein_coding	802.897	797.171
ENSG00000214706.10	435.518	-0.125775	0.0307734	-4.08715	4.36709e-05	0.00844792	0.916511	IFRD2	protein_coding	457.455	431.223
ENSG00000273306.1	23.7792	-0.0838532	0.0205138	-4.08765	4.35762e-05	0.00844792	0.943534	AC018690.1	antisense	25.4165	24.6987
ENSG00000121104.7	1634.24	-0.155042	0.0379954	-4.08055	4.49299e-05	0.0084597	0.898106	FAM117A	protein_coding	1686.71	1610.27
ENSG00000169895.5	1560.68	0.0497592	0.012191	4.08163	4.47205e-05	0.0084597	1.03509	SYAP1	protein_coding	1540.64	1673.15
ENSG00000163162.8	22685.9	0.108103	0.0264809	4.0823	4.4592e-05	0.0084597	1.07781	RNF149	protein_coding	21845.5	24633.4
ENSG00000170837.2	607.031	0.152421	0.0373476	4.08114	4.48157e-05	0.0084597	1.11143	GPR27	protein_coding	564.263	665.971
ENSG00000186205.12	1575.92	0.142519	0.0349728	4.07516	4.59835e-05	0.00860075	1.10383	2022-03-01	protein_coding	1485.06	1744.71
ENSG00000205250.8	871.81	-0.103432	0.0254098	-4.07057	4.68973e-05	0.00871394	0.930816	E2F4	protein_coding	891.311	888.163
ENSG00000263235.1	13.1956	-0.113047	0.0278147	-4.0643	4.81763e-05	0.00889309	0.924633	AC006111.2	sense_overlapping	13.9794	13.2087
ENSG00000200731.1	36.4812	-0.0676381	0.0166506	-4.0622	4.86126e-05	0.00891536	0.954199	RNU1-124P	snRNA	38.1465	37.8966
ENSG00000128524.4	170.087	-0.092322	0.0227397	-4.05995	4.90834e-05	0.00894363	0.938012	ATP6V1F	protein_coding	176.746	170.43
ENSG00000059804.15	10445.9	0.133984	0.03303	4.05642	4.98298e-05	0.00902142	1.09732	SLC2A3	protein_coding	9882.38	11472.3
ENSG00000115604.10	1486.87	0.121691	0.0300281	4.05256	5.06607e-05	0.00911344	1.08801	IL18R1	protein_coding	1420.36	1643.61
ENSG00000003402.19	38655	0.0806019	0.0199265	4.04496	5.23331e-05	0.0091804	1.05746	CFLAR	protein_coding	37394.4	42209
ENSG00000272056.1	34.5414	-0.0695233	0.0171756	-4.04779	5.1703e-05	0.0091804	0.952953	AC013472.3	antisense	36.0023	35.3303
ENSG00000166169.16	811.503	-0.124945	0.0308685	-4.04766	5.17331e-05	0.0091804	0.917039	POLL	protein_coding	829.998	814.9
ENSG00000132286.11	830.216	-0.0654235	0.0161693	-4.04616	5.20649e-05	0.0091804	0.955665	TIMM10B	protein_coding	869.407	859.775
ENSG00000170915.8	752.507	-0.0768143	0.0190474	-4.03279	5.51177e-05	0.0096073	0.948149	PAQR8	protein_coding	802.034	770.216
ENSG00000119471.14	2028.27	0.11764	0.0291809	4.03139	5.5447e-05	0.0096073	1.08496	HSDL2	protein_coding	1936.13	2206.55
ENSG00000263944.2	15.3952	0.103854	0.0257765	4.02902	5.60103e-05	0.00964572	1.07464	RN7SL435P	misc_RNA	14.6934	17.1198
ENSG00000102580.14	4018.97	0.0991124	0.0246306	4.02395	5.72309e-05	0.00979619	1.07111	DNAJC3	protein_coding	3831.19	4406.77
ENSG00000221869.4	3318.02	0.134998	0.0335761	4.02064	5.80394e-05	0.00987475	1.09809	CEBPD	protein_coding	3133.06	3680.48
ENSG00000182310.14	211.077	0.138895	0.0345863	4.0159	5.92182e-05	0.00989644	1.10106	SPACA6	protein_coding	192.897	233.534
ENSG00000160179.18	1185.13	0.155119	0.0386022	4.01839	5.85977e-05	0.00989644	1.11351	ABCG1	protein_coding	1108.45	1332.94
ENSG00000010539.11	1578.51	0.0584939	0.0145613	4.01707	5.89259e-05	0.00989644	1.04138	ZNF200	protein_coding	1566.68	1682.68
ENSG00000203446.2	28.3265	0.0769632	0.0191866	4.01131	6.03836e-05	0.00997319	1.0548	AC004988.1	antisense	27.1716	30.3212
ENSG00000164674.15	1465.07	0.107948	0.0269094	4.01154	6.03239e-05	0.00997319	1.07769	SYTL3	protein_coding	1407.44	1637
ENSG00000249662.6	321.668	0.157389	0.0392499	4.00991	6.07415e-05	0.00997397	1.11527	LINC02218	protein_coding	306.561	354.407
ENSG00000071564.14	534.02	-0.120563	0.0301186	-4.00293	6.25639e-05	0.0101908	0.919829	TCF3	protein_coding	549.915	531.503
ENSG00000279821.1	127.217	0.136872	0.0341999	4.0021	6.27834e-05	0.0101908	1.09952	AC145098.2	TEC	115.86	141.886
ENSG00000099785.10	2668.11	-0.168622	0.042223	-3.9936	6.50772e-05	0.010211	0.889692	2022-03-02	protein_coding	2764.2	2586.88
ENSG00000166523.7	2811.52	0.155062	0.038822	3.99418	6.49172e-05	0.010211	1.11347	CLEC4E	protein_coding	2615.95	3140.33
ENSG00000254788.7	180.867	0.111826	0.0279564	4.00003	6.33345e-05	0.010211	1.0806	CKLF-CMTM1	protein_coding	173.824	198.88
ENSG00000182247.9	204.806	-0.0847515	0.0212214	-3.99369	6.50535e-05	0.010211	0.942947	UBE2E2	protein_coding	214.249	210.203
ENSG00000186115.12	107.649	0.171116	0.0428192	3.99625	6.43551e-05	0.010211	1.12593	CYP4F2	protein_coding	97.1053	122.688
ENSG00000204701.2	84.8673	0.12094	0.0302604	3.99666	6.42434e-05	0.010211	1.08744	OR2J3	protein_coding	80.2494	92.902
ENSG00000092200.12	275.737	0.128971	0.0323527	3.98641	6.70796e-05	0.0103526	1.09351	RPGRIP1	protein_coding	265.625	302.53
ENSG00000285861.1	9.52795	0.132188	0.0331413	3.98861	6.64607e-05	0.0103526	1.09595	AC026991.2	antisense	8.89474	10.5082
ENSG00000233246.1	10.0349	0.129423	0.032466	3.98643	6.70761e-05	0.0103526	1.09386	AL513327.2	antisense	9.45995	10.824
ENSG00000243417.1	12.0208	0.117191	0.0294903	3.9739	7.07063e-05	0.0107488	1.08462	AC023424.2	processed_pseudogene	11.1876	13.0345
ENSG00000059728.10	27693.9	0.125315	0.03154	3.9732	7.09123e-05	0.0107488	1.09075	MXD1	protein_coding	26340.4	30472.7
ENSG00000154122.13	1718.91	-0.120077	0.0302283	-3.97234	7.11688e-05	0.0107488	0.920138	ANKH	protein_coding	1776.51	1727.1
ENSG00000105835.11	66528.3	0.158963	0.0399875	3.97532	7.02852e-05	0.0107488	1.11648	NAMPT	protein_coding	62353.9	72859.5
ENSG00000142156.14	46.7266	0.27934	0.0704568	3.96469	7.34908e-05	0.010924	1.21364	COL6A1	protein_coding	39.1579	50.4973
ENSG00000178726.6	1001.92	0.169849	0.0429602	3.95364	7.69706e-05	0.010924	1.12494	THBD	protein_coding	961.316	1098.43
ENSG00000266922.1	30.8881	0.0722917	0.0182841	3.9538	7.69197e-05	0.010924	1.05139	AC008543.3	sense_intronic	30.1121	33.2523
ENSG00000259349.1	33.6548	-0.0692096	0.0174874	-3.95768	7.56816e-05	0.010924	0.95316	AC011921.1	antisense	34.8673	34.4483
ENSG00000134627.11	150.834	-0.0946048	0.0239187	-3.95526	7.64526e-05	0.010924	0.936529	PIWIL4	protein_coding	155.11	155.466
ENSG00000167434.9	338.982	0.176686	0.0446843	3.9541	7.68243e-05	0.010924	1.13028	CA4	protein_coding	310.924	375.439
ENSG00000145491.11	424.876	0.131808	0.033325	3.95522	7.6465e-05	0.010924	1.09567	ROPN1L	protein_coding	402.087	464.505
ENSG00000234638.1	15.3831	0.102395	0.0258965	3.954	7.68552e-05	0.010924	1.07355	AC053503.4	antisense	14.4462	16.9819
ENSG00000244687.11	1382.19	-0.0727715	0.0184043	-3.95406	7.68375e-05	0.010924	0.95081	UBE2V1	protein_coding	1431.06	1427.36
ENSG00000183172.8	213.443	-0.0780063	0.0197121	-3.95729	7.58061e-05	0.010924	0.947366	SMDT1	protein_coding	220.121	219.766
ENSG00000236388.1	27.8515	0.0759698	0.0191549	3.96608	7.30648e-05	0.010924	1.05407	ITCH-AS1	antisense	27.1121	30.4773
ENSG00000280181.1	101.532	0.105248	0.0265667	3.96163	7.44397e-05	0.010924	1.07568	AC025262.2	TEC	98.3707	111.33
ENSG00000048162.20	153.326	-0.069875	0.0176812	-3.95194	7.75212e-05	0.0109472	0.952721	NOP16	protein_coding	163.346	154.624
ENSG00000179262.9	331.593	-0.154302	0.039111	-3.94523	7.97237e-05	0.0111467	0.898567	RAD23A	protein_coding	338.915	327.955
ENSG00000106263.17	1973.67	-0.0911297	0.023095	-3.94587	7.9511e-05	0.0111467	0.938787	EIF3B	protein_coding	2045.19	2025.19
ENSG00000167705.11	1632	-0.201744	0.0511766	-3.94211	8.07676e-05	0.011237	0.869499	RILP	protein_coding	1734.65	1533.26
ENSG00000284930.1	851.612	0.132133	0.0335447	3.93903	8.18132e-05	0.0112715	1.09591	AC005280.2	lincRNA	811.645	934.027
ENSG00000084110.10	2594.45	0.129401	0.0328468	3.93952	8.16443e-05	0.0112715	1.09384	HAL	protein_coding	2458.16	2874.94
ENSG00000267512.1	13.5875	0.110383	0.028061	3.93369	8.36509e-05	0.0113766	1.07952	AC011446.1	antisense	12.8535	14.2414
ENSG00000135407.10	679.134	0.131552	0.0334548	3.93222	8.41633e-05	0.0113766	1.09547	AVIL	protein_coding	642.844	751.541
ENSG00000140403.12	1157.14	-0.163427	0.0415617	-3.93216	8.41873e-05	0.0113766	0.892901	DNAJA4	protein_coding	1204.23	1146.15
ENSG00000146540.14	420.319	-0.0839217	0.0213276	-3.93488	8.3237e-05	0.0113766	0.943489	C7orf50	protein_coding	434.87	429.123
ENSG00000167110.17	1056.5	0.0784538	0.0199742	3.92775	8.57439e-05	0.0115317	1.05589	GOLGA2	protein_coding	1005.72	1164.55
ENSG00000102882.11	521.229	0.106438	0.0271245	3.92404	8.70749e-05	0.0115392	1.07657	MAPK3	protein_coding	492.712	580.009
ENSG00000274357.1	32.0862	0.127342	0.0324692	3.92193	8.78421e-05	0.0115392	1.09228	RF00017	misc_RNA	29.8169	34.8385
ENSG00000155744.9	8538.66	0.12753	0.0325059	3.92328	8.73533e-05	0.0115392	1.09242	FAM126B	protein_coding	8111.14	9335.39
ENSG00000226842.1	14.7193	0.104781	0.026689	3.92601	8.63672e-05	0.0115392	1.07533	AL158834.1	antisense	14.1625	15.9601
ENSG00000133069.16	458.126	-0.209392	0.0533824	-3.92248	8.76405e-05	0.0115392	0.864902	TMCC2	protein_coding	471.721	437.744
ENSG00000125991.19	816.532	-0.0631082	0.0161086	-3.91766	8.94123e-05	0.0116911	0.9572	ERGIC3	protein_coding	832.153	846.871
ENSG00000130021.13	265.776	-0.060293	0.0154005	-3.91501	9.04009e-05	0.0117659	0.959069	PUDP	protein_coding	280.609	275.232
ENSG00000184730.10	2949.9	0.131646	0.033658	3.91128	9.18083e-05	0.0118942	1.09554	APOBR	protein_coding	2722.98	3358.87
ENSG00000103257.8	201.067	-0.178314	0.0456176	-3.90888	9.27233e-05	0.0119579	0.883735	SLC7A5	protein_coding	202.879	197.171
ENSG00000108559.11	739.855	-0.079049	0.0202297	-3.90757	9.32279e-05	0.0119683	0.946682	NUP88	protein_coding	779.767	751.875
ENSG00000165115.14	1126.49	0.118254	0.0302807	3.90527	9.41215e-05	0.0120284	1.08542	KIF27	protein_coding	1074.22	1243.77
ENSG00000136319.11	1175.45	-0.0561762	0.0143926	-3.90312	9.49591e-05	0.0120808	0.96181	TTC5	protein_coding	1230.25	1212.13
ENSG00000118046.14	3564.08	-0.129078	0.0330947	-3.90028	9.60833e-05	0.0121146	0.914415	STK11	protein_coding	3731.2	3500.94
ENSG00000184178.15	838.43	-0.0653207	0.0167458	-3.90073	9.5902e-05	0.0121146	0.955733	SCFD2	protein_coding	890.297	864.43
ENSG00000231955.1	13.1773	0.110096	0.0282452	3.89786	9.70474e-05	0.0121818	1.0793	AC007383.3	antisense	12.0206	14.2813
ENSG00000251179.1	28.6979	0.205583	0.0527615	3.89646	9.76085e-05	0.012198	1.15315	TMEM92-AS1	antisense	25.5606	32.6661
ENSG00000144029.11	1729.14	-0.0272408	0.00699319	-3.89534	9.80629e-05	0.0122008	0.981295	MRPS5	protein_coding	1777.89	1803.09
ENSG00000144468.16	1508.54	-0.0912509	0.023452	-3.89097	9.98444e-05	0.0123311	0.938708	RHBDD1	protein_coding	1563.15	1523.56
ENSG00000198556.13	533.334	-0.0524982	0.0134935	-3.89063	9.99834e-05	0.0123311	0.964265	ZNF789	protein_coding	559.805	550.592
ENSG00000268170.2	169.319	0.157478	0.0405253	3.88592	0.000101944	0.0124641	1.11534	AC073342.2	antisense	159.293	186.234
ENSG00000198876.12	33334.1	-0.214929	0.0553004	-3.88658	0.000101666	0.0124641	0.861588	DCAF12	protein_coding	35067.5	32153.3
ENSG00000165175.15	3007.51	0.101489	0.0261786	3.87677	0.00010585	0.0127782	1.07288	MID1IP1	protein_coding	2891.29	3298.91
ENSG00000184787.18	3102.86	-0.0597825	0.015419	-3.87719	0.00010567	0.0127782	0.959409	UBE2G2	protein_coding	3282.58	3198.18
ENSG00000204228.3	67.0302	-0.102055	0.0263249	-3.87673	0.000105871	0.0127782	0.931705	HSD17B8	protein_coding	70.0961	67.7278
ENSG00000115507.9	39.7837	0.237575	0.0614013	3.86923	0.000109181	0.0131217	1.17901	OTX1	protein_coding	33.3272	44.118
ENSG00000119977.20	212.556	-0.072337	0.0187265	-3.86282	0.000112085	0.0133485	0.951096	TCTN3	protein_coding	222.005	220.947
ENSG00000160563.13	292.637	-0.0556873	0.0144195	-3.86195	0.000112486	0.0133485	0.962136	MED27	protein_coding	304.586	304.985
ENSG00000131043.11	293.398	-0.0547018	0.0141606	-3.86296	0.000112021	0.0133485	0.962793	AAR2	protein_coding	304.076	306.142
ENSG00000250687.6	404.623	0.119216	0.0308899	3.8594	0.000113667	0.0133763	1.08614	AC146944.2	transcribed_unprocessed_pseudogene	384.78	434.517
ENSG00000148341.17	1157.64	-0.10107	0.0261873	-3.85949	0.000113625	0.0133763	0.932341	SH3GLB2	protein_coding	1199.97	1165.71
ENSG00000124126.13	15387.7	0.118555	0.0307537	3.85496	0.000115746	0.0135644	1.08565	PREX1	protein_coding	14391.5	17339.5
ENSG00000013306.15	11495.8	-0.217404	0.0564536	-3.85101	0.00011763	0.0137155	0.860112	SLC25A39	protein_coding	12094.3	10936.6
ENSG00000249931.4	59.5436	0.188234	0.048889	3.85023	0.000118007	0.0137155	1.13937	GOLGA8K	protein_coding	51.7826	65.1615
ENSG00000249138.1	383.028	0.169897	0.044142	3.84886	0.000118667	0.0137358	1.12498	SLED1	transcribed_processed_pseudogene	353.609	433.955
ENSG00000079308.18	4278.38	-0.231015	0.0601578	-3.84015	0.000122959	0.014073	0.852035	TNS1	protein_coding	4456.37	4095.99
ENSG00000162396.5	55.1133	-0.090823	0.0236427	-3.84148	0.000122297	0.014073	0.938987	PARS2	protein_coding	58.0137	55.657
ENSG00000062282.14	3835.57	0.129989	0.033852	3.83992	0.000123075	0.014073	1.09429	DGAT2	protein_coding	3610.94	4240.4
ENSG00000241547.1	38.5845	-0.0619878	0.0161521	-3.83775	0.000124166	0.0141404	0.957943	ACTG1P20	processed_pseudogene	39.6934	40.5118
ENSG00000253736.2	31.5219	0.156534	0.040801	3.83652	0.00012479	0.0141544	1.11461	AC022217.3	antisense	29.8055	34.5227
ENSG00000103196.11	3201.76	0.165046	0.0430347	3.83518	0.000125471	0.0141748	1.1212	CRISPLD2	protein_coding	2936.5	3647.36
ENSG00000167676.4	340.212	0.173791	0.0453532	3.83195	0.000127134	0.0142485	1.12802	PLIN4	protein_coding	305.174	390.555
ENSG00000118513.18	250.848	-0.0995824	0.0259847	-3.83235	0.000126925	0.0142485	0.933303	MYB	protein_coding	264.172	254.089
ENSG00000241286.2	24.1067	0.152339	0.039843	3.82349	0.000131578	0.0146171	1.11137	RPL29P25	processed_pseudogene	21.9428	26.6243
ENSG00000204345.1	47.832	0.205292	0.0537028	3.82274	0.000131975	0.0146171	1.15292	CD300LD	protein_coding	43.8078	52.9583
ENSG00000119383.19	799.428	-0.0718111	0.0187805	-3.82371	0.000131458	0.0146171	0.951443	PTPA	protein_coding	817.279	829.557
ENSG00000261043.5	232.574	0.188268	0.0492715	3.82104	0.000132893	0.0146613	1.1394	AC019294.3	lincRNA	196.444	277.354
ENSG00000242860.3	55.9599	0.0892775	0.0233826	3.81811	0.000134478	0.0147785	1.06384	RN7SL180P	misc_RNA	54.0686	60.8185
ENSG00000163464.7	9297.38	0.136526	0.0357792	3.81579	0.000135746	0.0148026	1.09925	CXCR1	protein_coding	8925.3	10278.2
ENSG00000167671.11	9970.02	-0.198349	0.0519717	-3.81648	0.000135368	0.0148026	0.871547	UBXN6	protein_coding	10465.8	9434.95
ENSG00000205643.10	96.9526	-0.079529	0.0208481	-3.81468	0.000136358	0.0148122	0.946367	CDPF1	protein_coding	101.204	98.7568
ENSG00000102760.12	1136.36	-0.13654	0.0358121	-3.81266	0.000137476	0.0148764	0.909698	RGCC	protein_coding	1220.65	1098.48
ENSG00000268734.1	115.808	0.123815	0.0325204	3.80732	0.000140483	0.0148949	1.08961	AC245128.3	lincRNA	107.414	127.857
ENSG00000255730.5	19.8521	0.268903	0.070707	3.80306	0.000142921	0.0148949	1.20489	AC011462.1	protein_coding	17.6728	23.1779
ENSG00000259376.1	7.46129	0.142929	0.0375746	3.80387	0.000142451	0.0148949	1.10414	AC090907.1	antisense	7.00458	8.13793
ENSG00000156232.7	881.304	-0.048553	0.0127558	-3.80634	0.000141037	0.0148949	0.966906	WHAMM	protein_coding	914.348	909.779
ENSG00000201573.1	13.6292	-0.103766	0.027229	-3.81085	0.000138488	0.0148949	0.930601	RF00019	misc_RNA	14.3021	14.1016
ENSG00000146535.13	604.728	-0.161421	0.0423677	-3.81002	0.000138958	0.0148949	0.894144	GNA12	protein_coding	624.089	603.84
ENSG00000284882.1	265.74	0.108812	0.0286113	3.80312	0.000142886	0.0148949	1.07834	AL359762.1	bidirectional_promoter_lncRNA	252.595	286.797
ENSG00000264251.2	18.3373	0.0902255	0.0236957	3.80767	0.000140281	0.0148949	1.06454	RN7SL819P	misc_RNA	17.7346	19.9492
ENSG00000174206.12	455.305	-0.0593167	0.015576	-3.80821	0.000139977	0.0148949	0.959719	C12orf66	protein_coding	481.952	468.394
ENSG00000160445.10	1563.66	-0.166209	0.0437006	-3.80336	0.000142749	0.0148949	0.891181	ZER1	protein_coding	1599.38	1571.37
ENSG00000277579.1	15.5773	0.0970025	0.0255187	3.80124	0.000143976	0.0149497	1.06955	AC244093.3	sense_intronic	14.9931	17.4428
ENSG00000235159.1	14.5599	-0.101176	0.0266368	-3.79834	0.000145667	0.0150698	0.932273	AL121672.2	lincRNA	15.0343	14.5336
ENSG00000165792.17	667.099	-0.0639634	0.016846	-3.79694	0.000146493	0.0151	0.956632	METTL17	protein_coding	702.542	686.575
ENSG00000144580.13	1323.5	-0.0585281	0.0154316	-3.79274	0.000148992	0.0152463	0.960243	CNOT9	protein_coding	1381.77	1367.83
ENSG00000120868.13	8824.65	0.0933429	0.0246064	3.79344	0.000148575	0.0152463	1.06684	APAF1	protein_coding	8534.32	9659.63
ENSG00000264049.1	27.2182	-0.0732104	0.0193077	-3.79176	0.000149582	0.0152514	0.95052	MIR4737	miRNA	28.8284	27.873
ENSG00000243554.1	27.1775	-0.0735322	0.0194052	-3.78931	0.000151069	0.0153476	0.950308	AC004967.1	transcribed_unprocessed_pseudogene	29.3295	27.5662
ENSG00000148572.15	1411.09	0.11466	0.0302763	3.78713	0.000152395	0.0154268	1.08272	NRBF2	protein_coding	1338.18	1534.99
ENSG00000273644.1	98.271	0.168739	0.0445834	3.7848	0.000153831	0.0155166	1.12408	AC215522.1	processed_pseudogene	91.2128	105.711
ENSG00000214013.9	1866.46	-0.0564269	0.0149156	-3.78309	0.000154893	0.0155682	0.961643	GANC	protein_coding	1944.09	1951.64
ENSG00000115828.16	2659.45	0.147523	0.0390163	3.78107	0.000156158	0.0156396	1.10767	QPCT	protein_coding	2483.35	2923.65
ENSG00000284948.1	3014.49	0.126561	0.0334965	3.77833	0.000157881	0.0156457	1.09169	AC107959.4	lincRNA	2882.48	3270.69
ENSG00000143226.13	20989.5	0.118865	0.0314583	3.77851	0.00015777	0.0156457	1.08588	FCGR2A	protein_coding	20222.6	22785
ENSG00000113303.11	820.754	0.141057	0.0373287	3.77878	0.000157597	0.0156457	1.10271	BTNL8	protein_coding	778.954	894.822
ENSG00000187097.12	522.814	-0.0833198	0.022064	-3.77627	0.000159194	0.0157207	0.943883	ENTPD5	protein_coding	531.416	536.849
ENSG00000172164.14	1116.85	-0.0702393	0.0186105	-3.77418	0.000160532	0.0157976	0.95248	SNTB1	protein_coding	1150.11	1160.86
ENSG00000100418.7	748.087	-0.0650009	0.0172364	-3.77115	0.000162499	0.0159356	0.955945	DESI1	protein_coding	774.078	768.869
ENSG00000099804.8	6600.84	-0.195963	0.051976	-3.77026	0.00016308	0.0159373	0.87299	CDC34	protein_coding	6859.22	6303.13
ENSG00000120029.12	988.686	-0.0571081	0.0151512	-3.76922	0.000163759	0.0159484	0.961189	ARMH3	protein_coding	1028.31	1035.35
ENSG00000259713.1	43.2524	0.124801	0.0331402	3.76585	0.000165982	0.0161093	1.09036	AC013391.2	sense_overlapping	41.0778	46.922
ENSG00000267340.1	9.31528	0.125076	0.0332309	3.76383	0.000167332	0.0161847	1.09056	AC060780.2	processed_pseudogene	8.96796	10.2995
ENSG00000140044.12	1102.11	0.0981773	0.0260991	3.76172	0.000168752	0.0162664	1.07042	JDP2	protein_coding	1059.71	1203.12
ENSG00000133028.11	1073.97	-0.0348495	0.00927746	-3.75636	0.0001724	0.0165615	0.976134	SCO1	protein_coding	1096.91	1124.33
ENSG00000167674.14	606.898	0.0778816	0.0207472	3.75383	0.00017415	0.016673	1.05547	HDGFL2	protein_coding	578.684	677
ENSG00000167536.13	889.919	0.116283	0.0310306	3.74737	0.000178697	0.0170505	1.08394	DHRS13	protein_coding	855.114	966.935
ENSG00000142453.11	519.285	-0.176038	0.046996	-3.74581	0.00017981	0.0170989	0.88513	CARM1	protein_coding	536.471	511.044
ENSG00000271749.1	11.0839	0.113763	0.0304193	3.73983	0.000184142	0.0173678	1.08205	AC005828.6	unprocessed_pseudogene	10.7071	12.2359
ENSG00000198671.3	23.1069	0.0789769	0.0211204	3.73937	0.000184482	0.0173678	1.05627	AC135895.1	antisense	22.1098	25.2214
ENSG00000196549.10	15575.3	0.154114	0.041199	3.74072	0.000183497	0.0173678	1.11274	MME	protein_coding	14466.4	17322.1
ENSG00000067606.16	501.942	0.0658324	0.0176234	3.73551	0.000187332	0.0174907	1.04669	PRKCZ	protein_coding	487.499	545.488
ENSG00000013364.18	6383.51	0.0879329	0.0235355	3.73617	0.000186842	0.0174907	1.06285	MVP	protein_coding	6162.44	6965.27
ENSG00000281969.1	71.6913	0.25082	0.0671671	3.73426	0.000188265	0.0174907	1.18988	AL592158.1	TEC	61.4165	82.4519
ENSG00000138867.16	7863.99	-0.164843	0.0441359	-3.73489	0.000187796	0.0174907	0.892026	GUCD1	protein_coding	8169	7705.38
ENSG00000180953.11	933.183	0.112069	0.0300253	3.73249	0.000189595	0.0175565	1.08078	ST20	protein_coding	905.188	1022.91
ENSG00000204673.10	385.719	-0.0804094	0.0215705	-3.72774	0.000193203	0.0177144	0.945789	AKT1S1	protein_coding	393.565	392.272
ENSG00000013583.9	187.743	-0.165708	0.0444568	-3.72739	0.000193474	0.0177144	0.891491	HEBP1	protein_coding	190.977	186.788
ENSG00000105393.15	1789.36	-0.126809	0.0340146	-3.72806	0.000192957	0.0177144	0.915855	BABAM1	protein_coding	1851.93	1768.19
ENSG00000282840.1	19.5182	0.169505	0.045481	3.72695	0.000193809	0.0177144	1.12467	AC004554.2	lincRNA	17.9817	21.1397
ENSG00000270330.1	7.66358	0.245557	0.065923	3.7249	0.000195391	0.0178014	1.18555	AL009183.1	processed_pseudogene	6.83066	8.29946
ENSG00000276770.1	7.73364	-0.133813	0.0359348	-3.72378	0.000196261	0.0178232	0.911419	MIR6780B	miRNA	8.2151	7.96552
ENSG00000005882.11	221.141	-0.101637	0.0273111	-3.72147	0.000198068	0.0179296	0.931975	PDK2	protein_coding	225.519	224.871
ENSG00000221817.9	526.089	-0.0449172	0.0120728	-3.72053	0.000198807	0.017939	0.969345	PPP3CB-AS1	processed_transcript	539.789	552.074
ENSG00000115946.7	365.322	-0.0571017	0.0153565	-3.7184	0.000200492	0.0179831	0.961193	PNO1	protein_coding	380.334	375.129
ENSG00000205629.11	198.27	-0.0545791	0.0146785	-3.7183	0.000200569	0.0179831	0.962875	LCMT1	protein_coding	203.757	207.586
ENSG00000258565.1	91.2086	0.108097	0.0290984	3.71488	0.000203304	0.0180563	1.07781	BLZF2P	unprocessed_pseudogene	86.3021	100.24
ENSG00000167994.11	78.9419	-0.223374	0.060118	-3.71559	0.000202728	0.0180563	0.85656	RAB3IL1	protein_coding	81.0686	74.2976
ENSG00000248719.1	20.5493	0.0835403	0.0224856	3.71527	0.000202985	0.0180563	1.05962	AC021127.1	antisense	20.1442	22.127
ENSG00000116017.10	1377.51	0.0989526	0.0266571	3.71205	0.000205589	0.018202	1.071	ARID3A	protein_coding	1277.75	1539.29
ENSG00000175931.12	1113.51	-0.167435	0.0451213	-3.71078	0.000206625	0.0182366	0.890424	UBE2O	protein_coding	1142.45	1116.21
ENSG00000162722.8	14762.8	-0.231925	0.062574	-3.70641	0.000210216	0.0184958	0.851498	TRIM58	protein_coding	15477.2	14168.7
ENSG00000115204.14	720.378	-0.0487323	0.0131516	-3.70543	0.000211032	0.0185098	0.966785	MPV17	protein_coding	749.876	747.356
ENSG00000002016.17	325.697	-0.0601415	0.0162426	-3.70271	0.000213306	0.0185938	0.95917	RAD52	protein_coding	335.133	334.327
ENSG00000157778.8	311.079	-0.0766979	0.0207105	-3.70333	0.000212788	0.0185938	0.948226	PSMG3	protein_coding	320.908	314.514
ENSG00000189013.14	12.0741	0.309243	0.0835825	3.69986	0.000215721	0.0186105	1.23906	KIR2DL4	protein_coding	10.1648	13.6044
ENSG00000171791.12	6310.93	-0.103556	0.0279799	-3.70109	0.000214679	0.0186105	0.930736	BCL2	protein_coding	6828.11	6400.67
ENSG00000215241.3	146.089	0.0908675	0.0245681	3.6986	0.000216792	0.0186105	1.06501	LINC02449	lincRNA	140.471	158.938
ENSG00000201441.1	20.3594	0.159292	0.0430591	3.69939	0.000216114	0.0186105	1.11674	RNU6-646P	snRNA	19.6476	22.2849
ENSG00000006652.13	6050.59	0.115338	0.0311826	3.69879	0.000216633	0.0186105	1.08323	IFRD1	protein_coding	5786.55	6575.1
ENSG00000256298.1	9.88641	0.226178	0.0612074	3.69527	0.00021965	0.0187987	1.16973	AC135388.1	lincRNA	8.79405	10.833
ENSG00000173867.10	35.3453	-0.143263	0.0388295	-3.68955	0.000224654	0.0190507	0.905469	AC013489.1	protein_coding	37.7551	35.5844
ENSG00000206629.1	10.6949	-0.113913	0.0308625	-3.691	0.000223378	0.0190507	0.924078	RNU1-63P	snRNA	11.0709	10.8966
ENSG00000100644.16	4549.05	0.0933797	0.0253163	3.68852	0.000225561	0.0190507	1.06687	HIF1A	protein_coding	4401.3	4959.51
ENSG00000059588.9	1683.35	-0.0744863	0.0201966	-3.68806	0.000225966	0.0190507	0.94968	TARBP1	protein_coding	1798.94	1718.79
ENSG00000183444.10	94.0259	-0.0873724	0.0236891	-3.6883	0.00022576	0.0190507	0.941235	OR7E38P	unprocessed_pseudogene	99.5973	98.3067
ENSG00000241665.3	24.982	0.0749527	0.0203391	3.68515	0.000228564	0.0191553	1.05333	RN7SL418P	misc_RNA	24.1213	27.1924
ENSG00000169084.13	729.64	0.0953902	0.0258805	3.68579	0.000227991	0.0191553	1.06835	DHRSX	protein_coding	697.984	800.41
ENSG00000277118.1	24.5522	0.0753607	0.0204632	3.68275	0.000230733	0.0192798	1.05362	RF00017	misc_RNA	23.849	26.7405
ENSG00000263993.2	9.38691	0.123295	0.0334859	3.68199	0.000231423	0.0192805	1.08922	RN7SL786P	misc_RNA	8.627	10.2613
ENSG00000120158.11	721.932	-0.0794482	0.0215926	-3.67942	0.000233767	0.0194185	0.94642	RCL1	protein_coding	744.201	729.241
ENSG00000159199.13	314.565	-0.0685122	0.0186252	-3.67846	0.000234644	0.0194342	0.953621	ATP5MC1	protein_coding	326.192	322.809
ENSG00000254694.1	21.4875	-0.0796785	0.0216787	-3.67543	0.00023745	0.019609	0.946268	AP001893.1	antisense	22.8924	22.2087
ENSG00000203288.3	35.7328	-0.0621423	0.016917	-3.67336	0.000239385	0.0196615	0.957841	TDRKH-AS1	antisense	37.0709	36.6534
ENSG00000145882.10	488.887	-0.068527	0.0186556	-3.67326	0.000239477	0.0196615	0.953611	PCYOX1L	protein_coding	514.805	503.396
ENSG00000153814.12	1813.87	-0.144648	0.0394169	-3.6697	0.000242838	0.0198796	0.9046	JAZF1	protein_coding	1820.97	1839.07
ENSG00000176422.13	527.114	-0.0521539	0.0142225	-3.66701	0.000245406	0.0200318	0.964495	SPRYD4	protein_coding	542.957	546.412
ENSG00000146409.11	681.427	-0.0897104	0.0244703	-3.66609	0.000246285	0.0200456	0.939711	SLC18B1	protein_coding	712.284	692.318
ENSG00000166788.9	294.236	-0.065075	0.0177686	-3.66235	0.000249911	0.0202823	0.955896	SAAL1	protein_coding	308.696	302.902
ENSG00000112195.8	1772.01	0.10217	0.0279059	3.66121	0.000251023	0.0203142	1.07339	TREML2	protein_coding	1691.05	1924.51
ENSG00000233184.6	281.074	-0.0912788	0.0249717	-3.65529	0.00025689	0.0206724	0.93869	AC093157.1	antisense	305.918	283.031
ENSG00000158089.14	151.938	0.199645	0.0546184	3.65527	0.000256914	0.0206724	1.14842	GALNT14	protein_coding	139.213	168.86
ENSG00000247271.6	202.605	-0.0652759	0.0178667	-3.65349	0.0002587	0.020757	0.955763	ZBED5-AS1	antisense	213.638	204.826
ENSG00000269293.2	181.478	-0.0637332	0.017452	-3.65192	0.000260287	0.0208252	0.956785	ZSCAN16-AS1	antisense	185.009	186.201
ENSG00000165775.17	917.701	-0.0937981	0.0257055	-3.64895	0.00026331	0.020974	0.937053	FUNDC2	protein_coding	944.904	921.574
ENSG00000168159.11	486.605	-0.148801	0.0407826	-3.64864	0.000263632	0.020974	0.902	RNF187	protein_coding	490.879	483.739
ENSG00000141084.10	1218.23	-0.156946	0.0430667	-3.64424	0.000268181	0.0210358	0.896922	RANBP10	protein_coding	1254.08	1213.64
ENSG00000285882.1	16.2261	0.0923033	0.025337	3.64303	0.000269448	0.0210358	1.06607	AC093516.1	sense_intronic	15.5606	17.5263
ENSG00000198931.10	523.582	-0.0891527	0.0244587	-3.64503	0.000267361	0.0210358	0.940075	APRT	protein_coding	551.67	529.205
ENSG00000139842.14	3198.42	-0.0715912	0.0196325	-3.64657	0.000265763	0.0210358	0.951588	CUL4A	protein_coding	3293.39	3315.37
ENSG00000131844.15	730.245	-0.0512984	0.0140813	-3.64303	0.00026945	0.0210358	0.965067	MCCC2	protein_coding	761.327	758.759
ENSG00000202374.1	15.0413	-0.187755	0.0515404	-3.64286	0.000269623	0.0210358	0.877971	RF00091	snoRNA	16.7643	15.0454
ENSG00000221988.12	72.2574	-0.0898218	0.0246542	-3.64326	0.000269204	0.0210358	0.939639	PPT2	protein_coding	75.5904	72.9746
ENSG00000109466.13	3234.52	0.101511	0.0278748	3.64168	0.000270867	0.0210747	1.0729	KLHL2	protein_coding	3132.03	3512.58
ENSG00000153560.11	1961.23	-0.0553839	0.0152211	-3.63862	0.000274108	0.0212682	0.962338	UBP1	protein_coding	2036.78	2056.49
ENSG00000260550.2	25.0164	0.188274	0.0517577	3.6376	0.000275188	0.0212935	1.1394	AC136618.1	lincRNA	22.6087	27.7659
ENSG00000046647.13	258.746	-0.0628365	0.0172837	-3.63559	0.00027734	0.0214014	0.95738	GEMIN8	protein_coding	274.959	264.564
ENSG00000001084.12	1351.98	-0.106966	0.0294368	-3.63377	0.000279313	0.0214949	0.928538	GCLC	protein_coding	1376.44	1375.79
ENSG00000139514.12	533.595	-0.0823523	0.0226683	-3.63292	0.000280231	0.0215035	0.944516	SLC7A1	protein_coding	552.343	550.205
ENSG00000169902.14	538.007	0.182772	0.050319	3.63226	0.000280948	0.0215035	1.13506	TPST1	protein_coding	496.359	603.201
ENSG00000139132.14	3182.98	0.10514	0.0289659	3.62977	0.000283671	0.0216533	1.0756	FGD4	protein_coding	3028.41	3488.67
ENSG00000155926.13	14752.6	0.0861712	0.0237511	3.62809	0.000285523	0.0217359	1.06155	SLA	protein_coding	14371.8	16063.2
ENSG00000161040.16	669.576	0.156581	0.0431841	3.62589	0.000287966	0.021863	1.11464	FBXL13	protein_coding	624.3	738.624
ENSG00000223336.1	57.2641	0.132344	0.0365594	3.61997	0.000294632	0.0222045	1.09607	RNU2-6P	snRNA	55.286	63.0309
ENSG00000238713.1	28.5894	-0.0679672	0.01878	-3.61912	0.000295609	0.0222045	0.953981	RF00019	misc_RNA	29.968	29.7822
ENSG00000248323.6	10418.8	0.109102	0.0301338	3.62059	0.000293935	0.0222045	1.07856	LUCAT1	antisense	9966.96	11440.1
ENSG00000206344.7	5546.66	0.109498	0.0302527	3.61946	0.000295219	0.0222045	1.07885	HCG27	lincRNA	5401.07	5990.33
ENSG00000130522.5	1684.9	-0.131064	0.0362433	-3.61623	0.000298924	0.0223939	0.913158	JUND	protein_coding	1784.78	1626.51
ENSG00000158850.14	371.07	-0.107923	0.0298614	-3.61414	0.000301342	0.0225153	0.927923	B4GALT3	protein_coding	382.201	378.799
ENSG00000132965.9	3852.76	0.127906	0.0354113	3.61201	0.000303832	0.0226415	1.09271	ALOX5AP	protein_coding	3683.86	4176.4
ENSG00000115758.12	5943.04	-0.156346	0.0433004	-3.61074	0.000305328	0.0226931	0.897295	ODC1	protein_coding	6158.67	5822.89
ENSG00000102900.12	968.768	-0.0474657	0.0131528	-3.6088	0.000307612	0.0228028	0.967635	NUP93	protein_coding	1002.43	1014.46
ENSG00000186431.18	978.539	0.12285	0.0340626	3.6066	0.00031024	0.0228975	1.08888	FCAR	protein_coding	923.522	1064.79
ENSG00000124762.13	261.317	-0.138684	0.0384553	-3.60637	0.00031051	0.0228975	0.908347	CDKN1A	protein_coding	273.396	260.211
ENSG00000133800.8	61.2269	0.151083	0.0419161	3.60441	0.000312861	0.0230108	1.1104	LYVE1	protein_coding	56.9886	67.5445
ENSG00000215297.3	17.0329	-0.0880994	0.0244531	-3.6028	0.000314812	0.0230941	0.940761	AL354941.1	processed_pseudogene	17.9405	17.4356
ENSG00000100266.18	5805.97	0.0974838	0.0270832	3.59942	0.000318923	0.0232557	1.06991	PACSIN2	protein_coding	5584.3	6386.6
ENSG00000283525.1	8.16837	0.273025	0.0758531	3.59939	0.000318968	0.0232557	1.20834	AC005622.1	transcribed_unprocessed_pseudogene	6.95881	8.89111
ENSG00000107951.14	823.649	-0.0335015	0.00930865	-3.59897	0.000319485	0.0232557	0.977046	MTPAP	protein_coding	840.089	863.559
ENSG00000260086.2	25.5366	0.134118	0.03728	3.59759	0.000321181	0.0233191	1.09742	AC007611.1	lincRNA	23.746	27.6207
ENSG00000237359.1	61.89	-0.142961	0.0397859	-3.59327	0.000326554	0.0236484	0.905658	AL354977.2	lincRNA	64.087	61.5753
ENSG00000130600.18	56.6795	0.2766	0.0770066	3.5919	0.000328277	0.0237123	1.21134	H19	processed_transcript	47.3135	66.5136
ENSG00000182307.13	671.643	-0.0454885	0.0126797	-3.5875	0.000333861	0.023993	0.968962	C8orf33	protein_coding	702.165	695.838
ENSG00000127954.12	13020.7	0.13232	0.0368781	3.58803	0.00033318	0.023993	1.09605	STEAP4	protein_coding	12378.9	14213
ENSG00000279447.1	328.976	0.172614	0.0481674	3.58363	0.000338853	0.0241787	1.1271	AL118508.4	TEC	310.819	369.86
ENSG00000101474.11	5012.03	0.106043	0.0296424	3.57741	0.000347021	0.0241787	1.07627	APMAP	protein_coding	4767.35	5515.36
ENSG00000260267.1	383.693	-0.0713381	0.0199436	-3.57699	0.000347574	0.0241787	0.951755	AC026471.1	antisense	404.867	390.358
ENSG00000246705.4	974.9	-0.133515	0.0372912	-3.58034	0.000343144	0.0241787	0.911607	H2AFJ	protein_coding	1018.13	950.423
ENSG00000249532.5	13.0622	0.166001	0.0463436	3.58196	0.000341026	0.0241787	1.12194	AC106864.1	antisense	11.7414	14.9347
ENSG00000120658.13	52.9353	0.171873	0.0479809	3.5821	0.000340839	0.0241787	1.12652	ENOX1	protein_coding	47.4005	58.098
ENSG00000270133.1	48.4659	0.0973085	0.0271731	3.58107	0.000342194	0.0241787	1.06978	AC025766.1	sense_intronic	46.9405	52.7332
ENSG00000125818.17	2729.08	-0.147614	0.0412312	-3.58015	0.000343399	0.0241787	0.902742	PSMF1	protein_coding	2814.92	2706.33
ENSG00000083444.16	701.446	0.0985878	0.0275292	3.58121	0.000342001	0.0241787	1.07072	PLOD1	protein_coding	667.968	768.982
ENSG00000252652.1	21.8747	-0.0769073	0.0214988	-3.57729	0.000347181	0.0241787	0.948088	RF00019	misc_RNA	22.9611	22.7858
ENSG00000134061.5	740.879	-0.109315	0.0305259	-3.58107	0.000342184	0.0241787	0.927028	CD180	protein_coding	794.481	748.775
ENSG00000065491.8	622.174	-0.123398	0.034481	-3.57873	0.000345264	0.0241787	0.918023	TBC1D22B	protein_coding	639.748	625.005
ENSG00000272407.1	10.2838	-0.113301	0.0316616	-3.57851	0.000345555	0.0241787	0.92447	AL022394.1	transcribed_processed_pseudogene	10.762	10.1452
ENSG00000100104.13	1003.71	-0.134502	0.03761	-3.57624	0.000348576	0.0241887	0.910984	SRRD	protein_coding	1032.45	996.628
ENSG00000115649.15	863.846	-0.144311	0.0403626	-3.57537	0.000349727	0.0242092	0.904811	CNPPD1	protein_coding	877.941	854.152
ENSG00000183690.12	218.581	0.108743	0.0304448	3.5718	0.000354531	0.0243626	1.07829	EFHC2	protein_coding	217.789	232.423
ENSG00000165071.14	4875.56	0.0904747	0.0253288	3.57201	0.000354251	0.0243626	1.06472	TMEM71	protein_coding	4748.06	5282.73
ENSG00000234663.6	1188.79	-0.0754896	0.0211324	-3.57221	0.000353975	0.0243626	0.94902	LINC01934	lincRNA	1249.68	1234.96
ENSG00000243664.1	39.6609	0.1807	0.0506139	3.57017	0.000356745	0.0244552	1.13343	RPS29P12	processed_pseudogene	36.7323	44.5318
ENSG00000129472.14	4049.79	-0.157602	0.0442259	-3.56357	0.000365839	0.024507	0.896514	RAB2B	protein_coding	4208.43	3936.91
ENSG00000258352.1	46.6189	-0.101391	0.0284464	-3.56428	0.00036486	0.024507	0.932134	AC119044.1	transcribed_processed_pseudogene	50.1739	47.9946
ENSG00000145335.15	40562.3	-0.196741	0.0551588	-3.5668	0.000361361	0.024507	0.87252	SNCA	protein_coding	42289.5	38905.1
ENSG00000233276.4	8036.59	-0.175382	0.0491594	-3.56762	0.000360236	0.024507	0.885533	GPX1	polymorphic_pseudogene	8351.39	7728.44
ENSG00000267575.6	473.685	-0.050831	0.0142576	-3.56518	0.000363602	0.024507	0.96538	AC006504.5	lincRNA	493.675	487.626
ENSG00000163563.7	32309.2	0.131527	0.0368971	3.56469	0.00036428	0.024507	1.09545	MNDA	protein_coding	30648	35200.3
ENSG00000273473.1	14.7221	-0.0947235	0.0265828	-3.56333	0.000366177	0.024507	0.936452	BX649601.1	lincRNA	15.341	14.6243
ENSG00000105810.9	2601.94	-0.0845113	0.0237026	-3.56549	0.000363182	0.024507	0.943104	CDK6	protein_coding	2783.36	2646.09
ENSG00000123933.16	2062.1	-0.0813307	0.0228214	-3.5638	0.00036553	0.024507	0.945185	MXD4	protein_coding	2106.44	2130.58
ENSG00000180992.6	337.011	-0.0865346	0.0242731	-3.56504	0.000363795	0.024507	0.941782	MRPL14	protein_coding	354.14	339.31
ENSG00000282602.1	76.1984	0.124752	0.0350607	3.55816	0.000373456	0.0248962	1.09032	Z82244.2	lincRNA	72.611	85.2087
ENSG00000260038.1	129.944	0.0733867	0.0206261	3.55795	0.000373756	0.0248962	1.05218	AC009090.1	sense_intronic	127.421	139.753
ENSG00000257127.6	140.909	0.0999556	0.028108	3.55613	0.000376365	0.025011	1.07174	CLLU1	processed_transcript	134.444	153.377
ENSG00000214253.8	2362.92	-0.140567	0.0395453	-3.55457	0.000378597	0.0251002	0.907163	FIS1	protein_coding	2420.2	2307.06
ENSG00000111058.7	884.149	0.127874	0.0359853	3.5535	0.000380136	0.0251131	1.09268	ACSS3	protein_coding	834.7	962.056
ENSG00000261338.2	458.229	0.053192	0.0149738	3.55234	0.00038182	0.0251131	1.03756	AC021016.2	sense_overlapping	448.796	497.241
ENSG00000163283.6	17.0653	0.25994	0.0731754	3.55228	0.000381903	0.0251131	1.19743	ALPP	protein_coding	13.9359	18.3593
ENSG00000157800.17	1411.17	0.104728	0.0294947	3.55076	0.000384126	0.0251131	1.07529	SLC37A3	protein_coding	1350.54	1526.91
ENSG00000164035.9	112.066	0.101777	0.0286592	3.55127	0.000383377	0.0251131	1.07309	EMCN	protein_coding	105.721	121.23
ENSG00000107521.18	1937.4	-0.105628	0.029738	-3.55196	0.000382367	0.0251131	0.9294	HPS1	protein_coding	2019.46	1943.88
ENSG00000100368.13	7929.68	0.112192	0.0316214	3.54798	0.000388198	0.0253207	1.08087	CSF2RB	protein_coding	7395.28	8775.44
ENSG00000260596.5	420.015	0.29982	0.0845294	3.54693	0.000389751	0.0253634	1.23099	DUX4	protein_coding	324.769	452.229
ENSG00000272689.1	19.0342	-0.0815073	0.0229875	-3.54572	0.000391541	0.0253847	0.94507	AC004832.4	sense_intronic	20.0503	19.6788
ENSG00000012232.8	2691.21	0.0967835	0.0272976	3.5455	0.000391876	0.0253847	1.06939	EXTL3	protein_coding	2582.73	2971.1
ENSG00000100504.16	8085.13	0.120351	0.0339528	3.54465	0.000393137	0.0254081	1.087	PYGL	protein_coding	7626.58	8968.07
ENSG00000276900.1	694.546	0.116658	0.0329341	3.54216	0.000396866	0.0255323	1.08422	AC023157.3	antisense	669.247	740.045
ENSG00000261173.1	72.3903	-0.0806895	0.0227781	-3.54242	0.000396472	0.0255323	0.945606	AC018845.3	antisense	76.7323	72.4628
ENSG00000105767.2	77.3831	0.117415	0.0331661	3.54022	0.000399795	0.0256623	1.08479	CADM4	protein_coding	72.3753	83.3811
ENSG00000173535.14	9960.35	0.120112	0.0339539	3.53751	0.00040392	0.0258683	1.08682	TNFRSF10C	protein_coding	9523.19	10873.8
ENSG00000013523.9	650.607	-0.0563197	0.0159297	-3.53552	0.000406973	0.0260049	0.961714	ANGEL1	protein_coding	675.62	680.214
ENSG00000102145.13	653.354	-0.185084	0.0523832	-3.53326	0.000410464	0.0261687	0.879598	GATA1	protein_coding	688.952	623.684
ENSG00000279180.1	17.4493	0.153247	0.0433956	3.5314	0.000413361	0.0262941	1.11207	AC061709.2	TEC	16.0458	18.8548
ENSG00000138363.14	403.234	-0.0632783	0.017928	-3.52959	0.000416206	0.0264156	0.957087	ATIC	protein_coding	427.057	416.381
ENSG00000130559.18	842.797	-0.0385223	0.0109163	-3.52889	0.000417302	0.0264257	0.973652	CAMSAP1	protein_coding	865.92	885.63
ENSG00000158856.18	5197.74	-0.210945	0.0598456	-3.52483	0.000423762	0.0267747	0.863971	DMTN	protein_coding	5381.36	4943.36
ENSG00000086232.12	4088.49	-0.151597	0.0430177	-3.52406	0.000424992	0.0267925	0.900253	EIF2AK1	protein_coding	4200.51	4060.6
ENSG00000125735.10	2326.33	0.0901955	0.025609	3.52203	0.000428261	0.0269385	1.06451	TNFSF14	protein_coding	2243.72	2514.18
ENSG00000135932.10	7692	0.0768412	0.0218299	3.52	0.000431549	0.027085	1.05471	CAB39	protein_coding	7464.38	8356.91
ENSG00000257094.1	19.1365	0.0819221	0.0232794	3.51909	0.000433035	0.027118	1.05843	AC016957.1	processed_pseudogene	18.7849	20.4828
ENSG00000007968.6	1231.78	-0.193787	0.0550933	-3.51744	0.000435737	0.027179	0.874307	E2F2	protein_coding	1255.78	1229.85
ENSG00000141968.7	4805.2	0.0728976	0.0207254	3.51732	0.000435934	0.027179	1.05183	VAV1	protein_coding	4639.35	5266.4
ENSG00000262227.1	33.6557	-0.0612827	0.017443	-3.51331	0.000442562	0.0275315	0.958412	AC004771.3	antisense	34.7323	34.6479
ENSG00000125124.11	1036.48	-0.0680644	0.0193974	-3.50894	0.000449899	0.0278651	0.953917	BBS2	protein_coding	1088.77	1077.15
ENSG00000166947.13	4002.97	-0.220995	0.0629749	-3.50925	0.000449365	0.0278651	0.857974	EPB42	protein_coding	4232.22	3779.06
ENSG00000196961.12	1714.27	-0.144165	0.0410977	-3.50786	0.000451719	0.0279167	0.904903	AP2A1	protein_coding	1749.98	1698.07
ENSG00000120659.14	26.5724	0.195528	0.0557689	3.50605	0.000454815	0.0279888	1.14514	TNFSF11	protein_coding	23.3684	28.6915
ENSG00000259626.2	86.05	0.162482	0.0463437	3.50602	0.000454869	0.0279888	1.11921	MTND3P12	processed_pseudogene	83.4737	95.0508
ENSG00000203804.4	1713.61	0.10844	0.0309487	3.50386	0.000458575	0.0281555	1.07806	ADAMTSL4-AS1	processed_transcript	1629.46	1891.78
ENSG00000103342.12	13162.4	-0.177666	0.0507423	-3.50134	0.000462923	0.0282994	0.884132	GSPT1	protein_coding	13533.6	12830.7
ENSG00000131873.6	2702.44	0.0974791	0.0278398	3.50142	0.000462778	0.0282994	1.0699	CHSY1	protein_coding	2628.55	2910.95
ENSG00000249086.1	36.8796	0.201849	0.0576668	3.50027	0.000464791	0.0283444	1.15017	AC051649.1	sense_overlapping	29.8192	43.9746
ENSG00000129749.3	105.94	0.0854823	0.0244251	3.49977	0.000465666	0.0283444	1.06104	CHRNA10	protein_coding	102.05	115.75
ENSG00000108309.13	783.392	-0.198864	0.0568501	-3.49805	0.000468676	0.0284663	0.871236	RUNDC3A	protein_coding	815.707	744.96
ENSG00000276997.4	304.828	0.13155	0.037613	3.49747	0.000469701	0.0284673	1.09547	AL513314.2	lincRNA	278.144	339.263
ENSG00000105371.9	248.273	-0.121239	0.0346803	-3.4959	0.00047246	0.0285122	0.919398	ICAM4	protein_coding	256.815	245.203
ENSG00000135842.16	22880.2	0.121417	0.0347273	3.49628	0.000471791	0.0285122	1.0878	FAM129A	protein_coding	21713.5	25544
ENSG00000107262.21	7052.04	-0.162498	0.0465012	-3.49448	0.00047499	0.0286037	0.893477	BAG1	protein_coding	7223	6905.87
ENSG00000275494.1	38.3888	-0.104622	0.0299513	-3.49305	0.000477536	0.0286349	0.930049	AC133552.5	sense_intronic	41.4256	37.7151
ENSG00000104903.4	2838.19	-0.136678	0.0391249	-3.49338	0.000476955	0.0286349	0.909611	LYL1	protein_coding	2940.34	2767.98
ENSG00000184900.15	374.733	-0.0646019	0.0185001	-3.49198	0.000479458	0.0286893	0.956209	SUMO3	protein_coding	380.11	388.722
ENSG00000236810.5	71.3327	-0.0418238	0.0119798	-3.49119	0.000480877	0.0287133	0.971426	ELOA-AS1	antisense	73.2998	73.922
ENSG00000141985.9	538.861	-0.102242	0.0292984	-3.48966	0.000483641	0.0288174	0.931584	SH3GL1	protein_coding	549.723	545.648
ENSG00000214736.7	641.141	-0.117491	0.0336794	-3.48851	0.000485723	0.0288806	0.921789	TOMM6	protein_coding	667.451	636.374
ENSG00000066926.10	5596.15	-0.198299	0.0568958	-3.4853	0.000491588	0.0291068	0.871578	FECH	protein_coding	5702.49	5456.85
ENSG00000230839.1	102.845	0.140018	0.0401697	3.48567	0.000490906	0.0291068	1.10192	AL121760.1	lincRNA	95.1556	116.831
ENSG00000123700.4	5420.38	0.124795	0.0358171	3.48422	0.000493573	0.0291632	1.09035	KCNJ2	protein_coding	5149.42	5885
ENSG00000174718.11	34940.1	0.114354	0.0328464	3.48148	0.000498645	0.0292069	1.08249	KIAA1551	protein_coding	33898.3	37949.1
ENSG00000189060.5	981.285	-0.21542	0.061884	-3.48103	0.000499484	0.0292069	0.861295	H1F0	protein_coding	1044.19	947.274
ENSG00000113749.7	2558.95	0.121457	0.0348841	3.48174	0.000498162	0.0292069	1.08783	HRH2	protein_coding	2429.87	2847.11
ENSG00000276168.1	9.06168e+06	-0.155605	0.044682	-3.48251	0.000496742	0.0292069	0.897756	RN7SL1	misc_RNA	9.50317e+06	8.17614e+06
ENSG00000228506.1	178.586	-0.0765462	0.0219794	-3.48263	0.000496507	0.0292069	0.948325	AL513550.1	antisense	189.529	181.773
ENSG00000143537.13	451.63	-0.0935357	0.0268758	-3.48029	0.000500866	0.0292272	0.937223	ADAM15	protein_coding	467.4	465.388
ENSG00000170525.20	1992.08	0.122419	0.0352143	3.47639	0.000508205	0.0295943	1.08856	PFKFB3	protein_coding	1868.7	2208.83
ENSG00000251330.3	57.454	0.114681	0.0330055	3.47461	0.000511591	0.0297302	1.08274	AC114939.1	antisense	54.611	63.2486
ENSG00000259182.5	30.616	0.174317	0.0501992	3.47252	0.000515602	0.0297794	1.12843	AC019254.1	lincRNA	28.6064	33.1869
ENSG00000269976.1	9.83778	-0.111398	0.0320783	-3.4727	0.000515256	0.0297794	0.925691	AC012065.3	lincRNA	10.2311	10.1089
ENSG00000179526.16	552.62	-0.126452	0.0364069	-3.4733	0.0005141	0.0297794	0.916082	SHARPIN	protein_coding	568.613	542.67
ENSG00000110717.12	290.656	-0.0573008	0.0165047	-3.47179	0.000516995	0.029799	0.961061	NDUFS8	protein_coding	296.124	300.98
ENSG00000060138.12	16171.9	-0.170468	0.0491111	-3.47106	0.000518409	0.0298196	0.888555	YBX3	protein_coding	16834.4	15632.8
ENSG00000261529.1	154.962	-0.0776778	0.0223872	-3.46974	0.00052096	0.0299054	0.947582	AC100774.1	sense_intronic	163.465	160.708
ENSG00000048991.16	888.719	-0.0414812	0.0119598	-3.46838	0.000523603	0.0299962	0.971657	R3HDM1	protein_coding	913.428	929.668
ENSG00000255456.1	12.281	0.100959	0.0291346	3.46526	0.000529728	0.0302297	1.07249	AC084125.3	antisense	11.4737	13.4392
ENSG00000215244.2	310.764	0.156746	0.0452341	3.46521	0.00052982	0.0302297	1.11477	AL137145.2	lincRNA	290.858	348.425
ENSG00000157551.18	8244.24	0.137005	0.039554	3.46376	0.000532688	0.0303321	1.09962	KCNJ15	protein_coding	7771.11	9077.67
ENSG00000196083.9	5214.33	0.103556	0.0299044	3.46289	0.00053441	0.0303494	1.07442	IL1RAP	protein_coding	5062.5	5701.17
ENSG00000125170.10	68.0167	0.152132	0.0439391	3.46235	0.000535486	0.0303494	1.11121	DOK4	protein_coding	63.2517	72.8022
ENSG00000136908.17	1344.43	-0.171876	0.0496467	-3.46198	0.000536216	0.0303494	0.887688	DPM2	protein_coding	1394.89	1279.32
ENSG00000126249.7	89.224	-0.0791896	0.022897	-3.45851	0.000543169	0.0305602	0.946589	PDCD2L	protein_coding	94.0503	90.0799
ENSG00000103047.7	1221.39	-0.0454902	0.013155	-3.45801	0.000544176	0.0305602	0.968961	TANGO6	protein_coding	1271.84	1272.96
ENSG00000179841.8	197.238	0.132287	0.038266	3.45705	0.000546124	0.0305602	1.09603	AKAP5	protein_coding	182.609	219.181
ENSG00000183621.15	999.658	0.102391	0.0296238	3.45636	0.000547515	0.0305602	1.07355	ZNF438	protein_coding	971.943	1084.7
ENSG00000074181.8	75.1751	0.204279	0.0590974	3.45666	0.000546923	0.0305602	1.15211	NOTCH3	protein_coding	63.4531	80.5136
ENSG00000088992.17	2245.27	-0.171763	0.0496724	-3.45791	0.000544378	0.0305602	0.887757	TESC	protein_coding	2304.79	2163.83
ENSG00000244139.3	12.3936	0.182235	0.0527173	3.45684	0.000546552	0.0305602	1.13464	RN7SL397P	misc_RNA	11.2632	13.9147
ENSG00000266668.1	37.6516	-0.0986681	0.0285513	-3.45582	0.000548625	0.0305618	0.933895	MIR5692C2	miRNA	40.4966	38.5808
ENSG00000084693.15	107.928	-0.0834828	0.0241673	-3.45437	0.000551579	0.030649	0.943777	AGBL5	protein_coding	107.698	110.744
ENSG00000114656.11	646.222	0.11025	0.0319195	3.45399	0.000552362	0.030649	1.07941	KIAA1257	protein_coding	605.245	701.454
ENSG00000270885.1	23.6415	0.229807	0.0665578	3.45275	0.000554906	0.0306851	1.17268	RASL10B	protein_coding	19.984	25.726
ENSG00000143384.12	63022.2	0.0853607	0.0247235	3.45261	0.000555184	0.0306851	1.06095	MCL1	protein_coding	61470.5	68016.9
ENSG00000070182.20	1749.27	-0.231464	0.0670552	-3.45184	0.000556773	0.0307128	0.85177	SPTB	protein_coding	1786.61	1707.7
ENSG00000168852.12	80.3442	-0.0971601	0.0281576	-3.45058	0.000559383	0.0307966	0.934871	TPTE2P5	transcribed_unprocessed_pseudogene	84.0046	81.5263
ENSG00000161682.14	36.716	0.169983	0.0492716	3.44992	0.000560753	0.0308113	1.12505	FAM171A2	protein_coding	32.6041	39.6915
ENSG00000273472.1	55.0575	-0.109385	0.0317114	-3.4494	0.000561833	0.0308113	0.926983	AC096733.2	lincRNA	58.135	54.784
ENSG00000236180.2	10.1883	0.11004	0.0319071	3.44875	0.00056318	0.0308254	1.07926	AL445669.2	processed_pseudogene	9.9611	10.9746
ENSG00000273333.2	42.0171	0.131051	0.0380062	3.44814	0.000564466	0.030836	1.09509	AL662884.1	3prime_overlapping_ncRNA	38.5286	47.5826
ENSG00000185950.8	1574.11	0.107481	0.031176	3.44755	0.000565694	0.0308434	1.07735	IRS2	protein_coding	1480.78	1731.39
ENSG00000105281.12	1574.69	-0.181538	0.0526852	-3.44571	0.000569554	0.0309198	0.881762	SLC1A5	protein_coding	1653.43	1515.55
ENSG00000170871.11	6288.89	0.0807051	0.0234245	3.44532	0.000570379	0.0309198	1.05753	KIAA0232	protein_coding	6121.3	6814.01
ENSG00000188026.12	338.615	0.0806895	0.0234142	3.44617	0.000568592	0.0309198	1.05752	RILPL1	protein_coding	324.069	362.35
ENSG00000162367.11	1532.48	-0.158386	0.0460152	-3.44203	0.000577359	0.0311785	0.896027	TAL1	protein_coding	1581.14	1496.19
ENSG00000075426.11	4705.34	0.110506	0.032101	3.44245	0.00057648	0.0311785	1.07961	FOSL2	protein_coding	4413.84	5246.88
ENSG00000241721.1	140.592	0.15074	0.0438014	3.44145	0.000578614	0.0311867	1.11014	SUMO1P1	processed_pseudogene	133.007	150.646
ENSG00000260621.1	64.4928	0.11371	0.0330796	3.43747	0.000587171	0.0313487	1.08201	AC092140.1	antisense	61.4622	70.323
ENSG00000213390.10	2367.18	0.0740512	0.0215408	3.43772	0.000586627	0.0313487	1.05267	ARHGAP19	protein_coding	2317.45	2576.35
ENSG00000140575.12	23849.8	0.0857446	0.0249319	3.43915	0.000583533	0.0313487	1.06124	IQGAP1	protein_coding	22918	26472.8
ENSG00000178057.14	627.242	-0.0769463	0.0223772	-3.4386	0.000584722	0.0313487	0.948062	NDUFAF3	protein_coding	656.492	630.61
ENSG00000106771.12	2332.22	-0.0675721	0.0196562	-3.4377	0.000586673	0.0313487	0.954243	TMEM245	protein_coding	2444.54	2385.56
ENSG00000278861.1	26.8185	-0.0667309	0.0194175	-3.43663	0.000589005	0.0313696	0.954799	AC117503.2	TEC	27.8124	27.951
ENSG00000227910.1	12.1681	-0.100547	0.0292606	-3.43627	0.000589784	0.0313696	0.932679	AC092634.4	transcribed_processed_pseudogene	12.9794	12.0309
ENSG00000120215.9	171.157	0.0790901	0.0230417	3.43247	0.000598109	0.0317526	1.05635	MLANA	protein_coding	168.934	183.851
ENSG00000011028.13	860.23	-0.193468	0.0563791	-3.43156	0.00060013	0.0318001	0.874501	MRC2	protein_coding	902.156	815.604
ENSG00000180509.11	923.092	0.105321	0.0307498	3.4251	0.000614568	0.0323478	1.07573	KCNE1	protein_coding	874.918	1012.83
ENSG00000177272.8	1282.05	-0.0839655	0.0245163	-3.42489	0.000615048	0.0323478	0.943461	KCNA3	protein_coding	1381.35	1310.85
ENSG00000260452.1	304.729	0.0992687	0.02898	3.42542	0.000613842	0.0323478	1.07123	TPRKBP2	processed_pseudogene	296.066	337.02
ENSG00000174132.8	863.417	0.107664	0.0314332	3.42516	0.000614444	0.0323478	1.07748	FAM174A	protein_coding	841.206	928.091
ENSG00000113916.17	5676.34	0.131762	0.0385021	3.42221	0.000621151	0.0323674	1.09563	BCL6	protein_coding	5276.38	6337.69
ENSG00000187553.8	85.5649	0.111963	0.0327076	3.42316	0.000618967	0.0323674	1.0807	CYP26C1	protein_coding	80.7506	91.9492
ENSG00000135966.12	668.048	-0.050614	0.0147863	-3.42305	0.000619235	0.0323674	0.965525	TGFBRAP1	protein_coding	690.011	702.608
ENSG00000204392.10	57.493	-0.0456346	0.0133338	-3.42247	0.000620545	0.0323674	0.968864	LSM2	protein_coding	58.5789	59.588
ENSG00000147535.16	510.661	-0.0972168	0.0284014	-3.42296	0.000619429	0.0323674	0.934835	PLPP5	protein_coding	544.542	515.397
ENSG00000116741.7	14483.9	0.137936	0.0403223	3.42084	0.000624277	0.0324705	1.10033	RGS2	protein_coding	13725.2	15712.7
ENSG00000264968.1	91.5386	0.0806951	0.0236097	3.41788	0.000631104	0.03275	1.05753	AC090844.2	lincRNA	88.9245	98.5989
ENSG00000252784.1	11.8359	0.101265	0.0296311	3.41751	0.000631971	0.03275	1.07271	RF00019	misc_RNA	11.3249	12.8984
ENSG00000143157.11	1569.45	-0.0420475	0.012307	-3.41657	0.000634164	0.0328035	0.971275	POGK	protein_coding	1624.05	1642.97
ENSG00000143224.17	403.094	-0.0755147	0.0221104	-3.41536	0.000636989	0.0328894	0.949003	PPOX	protein_coding	416.261	405.486
ENSG00000103194.15	3645.23	0.0846138	0.0247921	3.41294	0.000642668	0.0330617	1.0604	USP10	protein_coding	3588.42	3920.27
ENSG00000223044.1	15.3034	-0.0874608	0.0256259	-3.41299	0.000642543	0.0330617	0.941178	RNU6-130P	snRNA	16.016	15.9855
ENSG00000120008.15	2970.9	-0.0635653	0.0186352	-3.41103	0.000647189	0.0332337	0.956896	WDR11	protein_coding	3076.16	3111.69
ENSG00000019144.18	353.382	0.119637	0.0350885	3.40959	0.000650614	0.033349	1.08646	PHLDB1	protein_coding	329.545	379.708
ENSG00000165030.3	794.25	0.112201	0.0329271	3.40756	0.000655474	0.0335372	1.08088	NFIL3	protein_coding	748.243	866.947
ENSG00000247624.6	198.483	0.0683972	0.0200813	3.40601	0.00065919	0.033545	1.04855	CPEB2-DT	lincRNA	195.336	212.185
ENSG00000242338.6	238.337	-0.0694024	0.020372	-3.40675	0.000657403	0.033545	0.953033	BMS1P4	transcribed_unprocessed_pseudogene	251.089	246.051
ENSG00000272361.2	41.2817	-0.0534317	0.0156857	-3.40639	0.000658293	0.033545	0.963641	AC005014.2	lincRNA	43.0618	42.9365
ENSG00000266195.2	12.5878	0.182261	0.0535259	3.40509	0.000661424	0.0335982	1.13466	RN7SL163P	misc_RNA	11.4989	13.7332
ENSG00000109381.19	5453.87	0.0720438	0.0211729	3.40264	0.000667387	0.0337425	1.0512	ELF2	protein_coding	5325.54	5872.76
ENSG00000274008.1	139.651	0.0673962	0.0198081	3.40245	0.000667849	0.0337425	1.04782	RF00017	misc_RNA	134.465	150.809
ENSG00000275158.1	8.53147	-0.219049	0.0643723	-3.40285	0.000666865	0.0337425	0.859131	TRBV12-5	TR_V_gene	9.65675	7.90381
ENSG00000254477.2	123.301	0.0876885	0.0257816	3.4012	0.000670895	0.0338359	1.06267	AP000640.1	processed_transcript	117.842	133.053
ENSG00000248162.1	111.504	0.0888984	0.0261458	3.4001	0.000673605	0.033912	1.06356	AC074198.1	processed_pseudogene	108.341	122.96
ENSG00000140332.15	5112.08	0.107277	0.0315624	3.3989	0.000676565	0.0340004	1.07719	TLE3	protein_coding	4807.84	5681.95
ENSG00000135828.11	3204.45	0.068072	0.0200378	3.39717	0.000680858	0.0341553	1.04831	RNASEL	protein_coding	3171	3423.87
ENSG00000149483.11	692.264	-0.0429043	0.0126358	-3.39547	0.000685111	0.0343078	0.970699	TMEM138	protein_coding	706.375	715.245
ENSG00000105701.15	26141.6	-0.188116	0.0554214	-3.39428	0.000688098	0.0343964	0.877751	FKBP8	protein_coding	27416.6	24494.5
ENSG00000110721.11	175.192	-0.0719701	0.0212144	-3.39251	0.00069255	0.0345578	0.951338	CHKA	protein_coding	181.595	180.853
ENSG00000107672.14	923.449	-0.0707845	0.0208704	-3.39162	0.000694798	0.0346088	0.95212	NSMCE4A	protein_coding	976.096	940.243
ENSG00000263403.1	9.20606	0.113856	0.0335806	3.39051	0.000697617	0.0346398	1.08212	MIR4673	miRNA	8.67277	10.1833
ENSG00000231705.1	7.50047	-0.124838	0.036821	-3.39041	0.000697873	0.0346398	0.917107	AL451069.2	lincRNA	7.56522	7.60073
ENSG00000277423.1	8.66571	-0.115237	0.0340045	-3.38888	0.000701789	0.0347121	0.923231	AC069234.5	lincRNA	9.26545	8.93829
ENSG00000157322.17	200.936	0.167641	0.0494749	3.3884	0.000703018	0.0347121	1.12322	CLEC18A	protein_coding	184.737	219.875
ENSG00000254396.1	23.9679	0.200253	0.0590938	3.38873	0.000702173	0.0347121	1.1489	AL355432.1	lincRNA	21.2632	26.5009
ENSG00000285667.1	372.522	0.0620314	0.0183128	3.38733	0.000705773	0.0347737	1.04393	AC012291.2	lincRNA	368.442	398.721
ENSG00000284594.1	9.9279	0.109031	0.0321915	3.38696	0.000706727	0.0347737	1.0785	MIR7847	miRNA	9.0984	11.2414
ENSG00000048052.21	1585	-0.100813	0.0297736	-3.386	0.000709206	0.034835	0.932507	HDAC9	protein_coding	1666.36	1637.68
ENSG00000214954.8	217.903	-0.056861	0.0167968	-3.38522	0.000711203	0.0348724	0.961354	LRRC69	protein_coding	225.533	228.559
ENSG00000270437.1	17.6256	0.191578	0.0566131	3.38399	0.000714396	0.0349683	1.14201	AC009501.2	processed_pseudogene	15.7986	20.0762
ENSG00000279799.1	50.7176	-0.0801765	0.0237023	-3.38265	0.000717893	0.0350786	0.945942	AC006077.2	TEC	53	51.5172
ENSG00000101882.9	696.084	0.0319853	0.00946277	3.38012	0.000724534	0.0351595	1.02242	NKAP	protein_coding	692.149	740.662
ENSG00000180185.11	511.856	-0.109289	0.0323373	-3.37965	0.000725772	0.0351595	0.927045	FAHD1	protein_coding	533.538	502.842
ENSG00000107669.17	1011.93	-0.0456514	0.0135075	-3.37972	0.000725606	0.0351595	0.968852	ATE1	protein_coding	1039.75	1058.78
ENSG00000255723.1	29.5844	0.110889	0.0328085	3.37989	0.000725143	0.0351595	1.07989	AC108516.2	processed_transcript	28.4897	32.5662
ENSG00000242247.10	1604.98	0.0584868	0.0172979	3.38115	0.000721839	0.0351595	1.04137	ARFGAP3	protein_coding	1586.4	1735.08
ENSG00000040633.12	1049.04	0.0620725	0.0183737	3.37834	0.000729251	0.0352675	1.04396	PHF23	protein_coding	1020.87	1138.85
ENSG00000224100.1	18.0976	0.0807388	0.0239031	3.37776	0.000730789	0.0352815	1.05756	AP001630.1	antisense	17.4531	19.6733
ENSG00000143774.16	27541.3	-0.172436	0.0510626	-3.37695	0.000732952	0.0353255	0.887343	GUK1	protein_coding	28547.6	26195
ENSG00000251434.1	39.1855	0.108615	0.0321687	3.37641	0.000734371	0.0353336	1.07819	AC104071.1	lincRNA	37.508	42.9746
ENSG00000259431.5	194.23	-0.0691939	0.0205029	-3.37484	0.000738582	0.0353776	0.95317	THTPA	protein_coding	200.151	200.53
ENSG00000087116.15	61.346	0.247256	0.0732664	3.37475	0.000738837	0.0353776	1.18695	ADAMTS2	protein_coding	48.8375	66.6025
ENSG00000232810.3	84.7991	-0.0897963	0.0266089	-3.37467	0.000739044	0.0353776	0.939655	TNF	protein_coding	86.5195	87.4083
ENSG00000135318.11	283.799	-0.152467	0.0451866	-3.37416	0.000740411	0.0353831	0.899711	NT5E	protein_coding	329.277	266.715
ENSG00000213995.11	656.022	-0.0619694	0.0183741	-3.37266	0.000744465	0.0355168	0.957956	NAXD	protein_coding	689.783	680.862
ENSG00000087589.16	1665.91	0.0887311	0.0263244	3.37067	0.000749849	0.0355754	1.06343	CASS4	protein_coding	1615.36	1818.61
ENSG00000105647.16	234.282	-0.131205	0.0389291	-3.37035	0.000750733	0.0355754	0.913069	PIK3R2	protein_coding	241.158	234.717
ENSG00000112335.14	4491.76	-0.14341	0.0425473	-3.37059	0.000750062	0.0355754	0.905377	SNX3	protein_coding	4612.08	4371.96
ENSG00000232310.7	81.7076	0.114573	0.0339848	3.3713	0.000748156	0.0355754	1.08265	AL078590.3	lincRNA	77.4737	87.7495
ENSG00000214456.8	406.221	0.110221	0.0327241	3.36821	0.000756592	0.035774	1.07939	PLIN5	protein_coding	382.803	443.742
ENSG00000240203.3	15.3637	0.1664	0.0494077	3.36789	0.000757458	0.035774	1.12225	RN7SL567P	misc_RNA	13.9062	17.7096
ENSG00000108424.9	5831.68	0.0730229	0.0216936	3.36611	0.000762373	0.0359461	1.05192	KPNB1	protein_coding	5654.59	6356.22
ENSG00000143416.20	4425.31	-0.215156	0.0639396	-3.36499	0.000765477	0.0360323	0.861453	SELENBP1	protein_coding	4679.12	4111.41
ENSG00000267385.1	203.792	0.107978	0.0320943	3.3644	0.000767116	0.0360493	1.07772	AC011498.4	protein_coding	193.817	222.054
ENSG00000248559.1	54.281	0.0861215	0.0256032	3.3637	0.000769046	0.03608	1.06151	AC109454.2	antisense	52.8741	58.6134
ENSG00000257108.1	112.381	-0.10341	0.03075	-3.36294	0.000771184	0.0361203	0.93083	NHLRC4	protein_coding	120.098	109.966
ENSG00000124731.12	6838.5	0.119853	0.0356487	3.36206	0.000773637	0.0361752	1.08662	TREM1	protein_coding	6585.41	7460.88
ENSG00000065559.14	2776.74	0.0788757	0.0234968	3.35687	0.000788311	0.0367445	1.05619	MAP2K4	protein_coding	2716.45	2991.88
ENSG00000204304.11	4017.84	0.0850833	0.0253463	3.35683	0.000788415	0.0367445	1.06075	PBX2	protein_coding	3820.94	4476.01
ENSG00000148334.14	400.541	-0.069626	0.0207463	-3.35607	0.000790593	0.0367854	0.952885	PTGES2	protein_coding	416.245	412.853
ENSG00000185261.14	1892.66	0.0768546	0.0229081	3.35491	0.000793916	0.0368792	1.05472	KIAA0825	protein_coding	1839.91	2051
ENSG00000105974.11	14.295	0.288904	0.0861639	3.35296	0.000799519	0.0370785	1.22171	CAV1	protein_coding	11.2677	16.1034
ENSG00000128482.15	21.6891	0.248199	0.07404	3.35223	0.000801635	0.0371157	1.18772	RNF112	protein_coding	17.4554	23.4392
ENSG00000184470.20	766.357	-0.0847101	0.025275	-3.35154	0.000803646	0.0371479	0.942974	TXNRD2	protein_coding	774.195	792.838
ENSG00000260239.1	12.9144	0.189732	0.056648	3.34932	0.000810114	0.0373857	1.14055	LINC02533	lincRNA	11.389	14.0744
ENSG00000161981.10	164.229	-0.0914629	0.0273136	-3.34862	0.000812142	0.0374182	0.938571	SNRNP25	protein_coding	172.826	164.96
ENSG00000122254.6	35.9196	0.152992	0.0456946	3.34815	0.000813539	0.0374215	1.11187	HS3ST2	protein_coding	31.9359	39.2305
ENSG00000135127.11	349.307	-0.07769	0.0232175	-3.34618	0.000819345	0.037488	0.947574	BICDL1	protein_coding	366.195	361.069
ENSG00000266160.2	28.546	0.117452	0.0351009	3.34612	0.000819524	0.037488	1.08482	RN7SL612P	misc_RNA	27.1602	31.1851
ENSG00000285239.1	10.231	0.106299	0.0317629	3.34665	0.000817942	0.037488	1.07646	AL137789.2	antisense	9.61556	11.3739
ENSG00000173930.8	1217	0.0985031	0.0294403	3.34585	0.000820295	0.037488	1.07066	SLCO4C1	protein_coding	1152.5	1346.87
ENSG00000211938.2	52.7147	-0.198082	0.0592528	-3.343	0.00082878	0.0378146	0.871709	IGHV3-7	IG_V_gene	59.9931	50.4446
ENSG00000156381.8	578.388	-0.169925	0.0508802	-3.33971	0.000838667	0.038204	0.888889	ANKRD9	protein_coding	602.995	548.156
ENSG00000283050.1	344.846	0.0807916	0.0242058	3.3377	0.000844748	0.038419	1.0576	GTF2IP12	transcribed_unprocessed_pseudogene	331.89	373.149
ENSG00000229563.6	46.2223	0.122759	0.0368286	3.33326	0.000858357	0.0389678	1.08882	LINC01204	lincRNA	43.3249	50.0272
ENSG00000179715.12	567.038	-0.0931462	0.0279478	-3.33286	0.000859574	0.0389678	0.937476	PCED1B	protein_coding	612.245	577.397
ENSG00000100626.16	119.141	0.116399	0.0349358	3.3318	0.000862847	0.0390535	1.08403	GALNT16	protein_coding	109.043	128.675
ENSG00000265145.1	11.9126	-0.0972989	0.0292183	-3.33006	0.000868272	0.0391735	0.934782	SNORD53	snoRNA	12.5172	12.1525
ENSG00000137216.18	932.009	-0.172281	0.0517347	-3.33008	0.000868195	0.0391735	0.887439	TMEM63B	protein_coding	960.366	918.768
ENSG00000136040.8	18463.6	0.0925778	0.0278249	3.32715	0.000877384	0.0395214	1.06627	PLXNC1	protein_coding	17724.8	20169.7
ENSG00000161533.11	5868.57	0.0961118	0.0289456	3.32043	0.00089879	0.0399604	1.06889	ACOX1	protein_coding	5617.27	6427.06
ENSG00000278600.1	2397.94	0.0858665	0.0258627	3.3201	0.000899863	0.0399604	1.06133	AC015871.3	sense_intronic	2338.7	2627.72
ENSG00000198176.12	1822.68	-0.133224	0.0400948	-3.32273	0.000891403	0.0399604	0.911791	TFDP1	protein_coding	1864.94	1794.56
ENSG00000143815.14	9448.87	0.0890818	0.0268288	3.32038	0.000898963	0.0399604	1.06369	LBR	protein_coding	9152.7	10257.6
ENSG00000233431.1	51.377	0.138872	0.0418052	3.32189	0.000894092	0.0399604	1.10104	LINC02596	antisense	47.6178	57.0417
ENSG00000163421.8	2967.02	0.148076	0.0445856	3.32118	0.000896391	0.0399604	1.10809	PROK2	protein_coding	2787.04	3241.75
ENSG00000180871.7	8892.7	0.124792	0.037578	3.32089	0.000897313	0.0399604	1.09035	CXCR2	protein_coding	8473.57	9876.3
ENSG00000283352.1	63.0525	-0.104246	0.0313709	-3.32303	0.00089044	0.0399604	0.930291	LINC00680-GUSBP4	processed_transcript	67.167	63.1906
ENSG00000165283.15	1076.09	-0.0948644	0.0285686	-3.32058	0.000898296	0.0399604	0.93636	STOML2	protein_coding	1112.78	1080.73
ENSG00000070423.17	443.489	-0.0757027	0.0228193	-3.31749	0.000908298	0.0401632	0.94888	RNF126	protein_coding	457.636	456.267
ENSG00000124882.3	147.782	0.117928	0.0355405	3.31813	0.000906216	0.0401632	1.08518	EREG	protein_coding	139.302	162.134
ENSG00000106268.15	377.199	-0.0775806	0.0233862	-3.31737	0.000908696	0.0401632	0.947646	NUDT1	protein_coding	387.952	378.77
ENSG00000264160.1	8.68906	-0.111503	0.0336335	-3.31524	0.00091566	0.04023	0.925623	MIR4762	miRNA	9.12128	9.25227
ENSG00000101004.14	97.1141	0.183631	0.0554235	3.31323	0.000922258	0.04023	1.13574	NINL	protein_coding	84.9428	109.537
ENSG00000141759.14	1309.46	-0.0473306	0.0142868	-3.3129	0.000923347	0.04023	0.967725	TXNL4A	protein_coding	1340.15	1354.78
ENSG00000166140.17	358.517	-0.0565072	0.0170599	-3.31228	0.000925385	0.04023	0.961589	ZFYVE19	protein_coding	371.053	373.129
ENSG00000173727.12	84.775	0.0708661	0.0213943	3.31239	0.000925039	0.04023	1.05035	AP000769.1	transcribed_unprocessed_pseudogene	82.1487	90.6171
ENSG00000130023.15	842.389	-0.0542165	0.0163609	-3.31379	0.00092042	0.04023	0.963117	ERMARD	protein_coding	880.112	876.194
ENSG00000103994.17	9215.3	0.0687695	0.0207655	3.31172	0.000927255	0.04023	1.04882	ZNF106	protein_coding	8996.83	10067
ENSG00000243385.2	12.7107	-0.0935485	0.0282077	-3.31642	0.000911786	0.04023	0.937215	AC094085.1	processed_pseudogene	13.1144	13.1416
ENSG00000116138.12	790.026	-0.0406568	0.0122782	-3.3113	0.00092864	0.04023	0.972212	DNAJC16	protein_coding	812.673	827.064
ENSG00000217083.1	29.6049	0.151016	0.0456067	3.31127	0.000928725	0.04023	1.11035	MTCO2P33	processed_pseudogene	28.1121	32.9891
ENSG00000184434.7	35.8089	0.0562491	0.0169688	3.31485	0.000916922	0.04023	1.03976	LRRC19	protein_coding	34.5973	38.5935
ENSG00000260838.3	59.3358	0.0893815	0.0269912	3.3115	0.00092797	0.04023	1.06391	AC022893.2	lincRNA	56.4874	65.2069
ENSG00000107147.12	63.9852	0.269009	0.0811973	3.31303	0.000922925	0.04023	1.20498	KCNT1	protein_coding	48.8627	69.1978
ENSG00000008294.20	9204.52	0.0719162	0.0217233	3.31055	0.000931122	0.0402721	1.05111	SPAG9	protein_coding	8995.89	9965.39
ENSG00000255459.1	48.6883	0.104719	0.0316362	3.31009	0.000932653	0.0402767	1.07528	AC105233.3	processed_pseudogene	45.2998	53.6098
ENSG00000260052.1	22.4252	0.169825	0.0513399	3.30786	0.000940134	0.0404685	1.12492	AC023813.3	lincRNA	20.2288	24.2468
ENSG00000228242.6	712.674	0.111939	0.0338383	3.30807	0.000939419	0.0404685	1.08068	AC093495.1	antisense	684.584	781.131
ENSG00000122203.14	1126.27	-0.0560607	0.0169497	-3.30748	0.000941395	0.0404685	0.961887	KIAA1191	protein_coding	1165.91	1166.06
ENSG00000130695.15	626.403	-0.0508431	0.0153786	-3.3061	0.000946038	0.0405447	0.965372	CEP85	protein_coding	648.279	652.768
ENSG00000274963.1	341.682	0.101741	0.0307698	3.30651	0.000944675	0.0405447	1.07307	RN7SL600P	misc_RNA	327.886	378.309
ENSG00000278828.1	2946.78	-0.137016	0.0414527	-3.30537	0.000948525	0.0405897	0.909398	HIST1H3H	protein_coding	3125.81	2798.31
ENSG00000118900.14	4209.4	0.111977	0.0338905	3.30409	0.000952845	0.0406015	1.08071	UBN1	protein_coding	3950.62	4729.67
ENSG00000066294.14	3198.9	-0.0669291	0.020253	-3.30464	0.000950975	0.0406015	0.954668	CD84	protein_coding	3305.59	3357.64
ENSG00000263956.6	1072.13	-0.0608829	0.018427	-3.304	0.000953153	0.0406015	0.958677	NBPF11	protein_coding	1117.93	1119.97
ENSG00000160712.12	11543.2	0.0907835	0.0274803	3.30359	0.000954552	0.0406015	1.06495	IL6R	protein_coding	11095.5	12664.1
ENSG00000185896.10	2640.45	0.0790658	0.0239485	3.30149	0.000961724	0.0408451	1.05633	LAMP1	protein_coding	2501.71	2943.94
ENSG00000270640.1	89.941	0.107474	0.0325586	3.30094	0.000963602	0.0408634	1.07734	AC104695.3	sense_intronic	86.0732	100.307
ENSG00000277581.1	23.849	-0.0686341	0.0207961	-3.30034	0.00096569	0.0408905	0.95354	AL023803.3	sense_intronic	25.0801	24.0472
ENSG00000142207.6	1089.81	-0.0513487	0.0155615	-3.29972	0.000967816	0.0409192	0.965034	URB1	protein_coding	1137.64	1133.53
ENSG00000101220.17	148.301	-0.0917016	0.0278099	-3.29745	0.000975675	0.0409988	0.938415	C20orf27	protein_coding	153.195	152.049
ENSG00000265791.1	32.7709	0.0585297	0.0177565	3.29625	0.000979859	0.0409988	1.0414	AC127024.4	sense_intronic	32.0847	35.0399
ENSG00000128918.14	148.248	0.159525	0.0483648	3.29837	0.000972477	0.0409988	1.11692	ALDH1A2	protein_coding	135.018	162.864
ENSG00000188486.3	185.059	-0.124143	0.0376453	-3.29771	0.000974762	0.0409988	0.917549	H2AFX	protein_coding	194.112	180.719
ENSG00000263940.2	82.251	0.0889187	0.0269734	3.29653	0.000978869	0.0409988	1.06357	RN7SL275P	misc_RNA	77.8238	89.3394
ENSG00000263529.2	11.2928	0.100938	0.0306103	3.29751	0.000975448	0.0409988	1.07247	RN7SL122P	misc_RNA	10.524	12.167
ENSG00000102003.10	65.0535	0.139817	0.0424102	3.29678	0.000978015	0.0409988	1.10177	SYP	protein_coding	59.4714	68.7405
ENSG00000277763.1	51.0727	0.125843	0.0381835	3.29574	0.000981615	0.0410115	1.09115	AL138995.1	lincRNA	47.8993	56.5717
ENSG00000173926.5	321.641	-0.0946055	0.0287133	-3.29484	0.00098479	0.0410833	0.936528	2022-03-03	protein_coding	339.426	319.564
ENSG00000240966.3	82.5258	0.0901161	0.0273733	3.29212	0.000994355	0.0414212	1.06446	RN7SL681P	misc_RNA	79.5973	91.0163
ENSG00000280228.1	21.7245	0.149771	0.0455016	3.29155	0.000996378	0.0414443	1.10939	AC079753.1	TEC	19.7597	23.8076
ENSG00000106628.10	114.95	-0.072662	0.0220803	-3.29081	0.000998979	0.0414914	0.950882	POLD2	protein_coding	120.174	116.53
ENSG00000171295.12	841.503	0.0486123	0.0147879	3.28731	0.0010115	0.0416831	1.03427	ZNF440	protein_coding	838.867	890.503
ENSG00000206053.12	611.428	-0.0467307	0.0142156	-3.28728	0.0010116	0.0416831	0.968128	JPT2	protein_coding	639.499	635.889
ENSG00000276651.1	59.7362	0.0433211	0.0131749	3.28815	0.00100848	0.0416831	1.03048	AC007950.2	lincRNA	59.357	63.1361
ENSG00000279189.1	339.182	0.083976	0.0255414	3.28784	0.0010096	0.0416831	1.05994	AP003972.1	TEC	327.151	369.327
ENSG00000161103.11	58.54	0.267339	0.0813227	3.28739	0.00101122	0.0416831	1.20359	AC008132.1	transcribed_processed_pseudogene	45.357	62.6279
ENSG00000272269.1	15.47	-0.169757	0.0516442	-3.28704	0.00101245	0.0416831	0.888992	AL138724.1	antisense	14.984	15.0018
ENSG00000249096.6	391.464	0.102917	0.031322	3.28577	0.00101705	0.041751	1.07394	LINC02362	lincRNA	374.151	428.826
ENSG00000203710.11	9868.52	0.114307	0.0347853	3.28607	0.00101596	0.041751	1.08245	CR1	protein_coding	9374.37	10891
ENSG00000236256.9	51.9072	0.188917	0.0575299	3.2838	0.00102417	0.0419821	1.13991	DIAPH2-AS1	antisense	44.9176	57.4392
ENSG00000226985.6	74.0968	0.0891249	0.0271508	3.28258	0.00102861	0.0421028	1.06372	LINC01203	lincRNA	70.5309	80.686
ENSG00000268240.1	104.733	0.136826	0.0417087	3.28053	0.00103613	0.0421662	1.09948	AC123912.2	lincRNA	97.4027	114.252
ENSG00000111300.9	1362.25	-0.0484	0.0147517	-3.28098	0.00103446	0.0421662	0.967008	NAA25	protein_coding	1425.71	1417.63
ENSG00000249667.1	119.575	-0.0995428	0.0303431	-3.28058	0.00103594	0.0421662	0.933329	LINC01259	lincRNA	131.185	120.494
ENSG00000272669.1	64.1759	0.146575	0.0446746	3.28094	0.00103463	0.0421662	1.10694	AL021707.6	antisense	56.3043	73.4936
ENSG00000276704.1	41.4132	-0.122439	0.0373377	-3.27922	0.00104096	0.042241	0.918634	AL442067.2	sense_intronic	43.1854	43.4029
ENSG00000135776.4	1559.32	-0.100527	0.0306527	-3.27954	0.00103975	0.042241	0.932692	ABCB10	protein_coding	1599.03	1560.92
ENSG00000049249.8	538.198	0.0802774	0.0244871	3.27835	0.00104415	0.04231	1.05722	TNFRSF9	protein_coding	516.874	586.018
ENSG00000278112.1	15.15	0.189633	0.0578711	3.27682	0.00104985	0.0424189	1.14047	AC145423.3	sense_intronic	13.5263	17.1942
ENSG00000172270.19	17260.1	-0.18016	0.0549768	-3.27702	0.00104909	0.0424189	0.882605	BSG	protein_coding	18160.7	16434.7
ENSG00000170892.10	2389.83	0.0898707	0.0274424	3.27489	0.00105704	0.042424	1.06427	TSEN34	protein_coding	2323.64	2573.33
ENSG00000168434.12	363.576	-0.0454013	0.0138668	-3.2741	0.00105999	0.042424	0.96902	COG7	protein_coding	375.648	381.857
ENSG00000005893.15	9463.07	0.0864504	0.0264086	3.27357	0.00106199	0.042424	1.06175	LAMP2	protein_coding	9168.41	10264.3
ENSG00000166261.10	400.914	-0.050518	0.0154302	-3.27397	0.00106049	0.042424	0.96559	ZNF202	protein_coding	422.146	414.98
ENSG00000255314.3	42.8385	0.118469	0.0361791	3.27451	0.00105847	0.042424	1.08558	AC024475.4	lincRNA	40.6018	45.8494
ENSG00000214629.3	93.1566	-0.0969169	0.0296036	-3.27382	0.00106104	0.042424	0.935029	RPSAP6	processed_pseudogene	99.9817	95.3575
ENSG00000086730.16	3862.18	0.0841693	0.025694	3.27583	0.00105352	0.042424	1.06008	LAT2	protein_coding	3721.58	4190.48
ENSG00000253043.1	28.185	0.129426	0.0395121	3.27562	0.00105432	0.042424	1.09386	RNU7-181P	snRNA	26.3043	31.8748
ENSG00000240244.3	9.67978	0.107438	0.0328257	3.273	0.00106413	0.0424493	1.07731	GAPDHP33	processed_pseudogene	9.29977	10.6388
ENSG00000241886.1	188.743	0.118008	0.0361262	3.26654	0.0010887	0.0426975	1.08524	AC112496.1	sense_intronic	179.281	208.477
ENSG00000131828.13	833.615	-0.0423569	0.0129682	-3.2662	0.00109	0.0426975	0.971067	PDHA1	protein_coding	863.389	873.258
ENSG00000142166.12	5160.45	0.0696826	0.0213209	3.26828	0.00108205	0.0426975	1.04949	IFNAR1	protein_coding	5046.29	5609.91
ENSG00000277449.1	367.516	0.0600034	0.0183481	3.27029	0.00107438	0.0426975	1.04247	CEBPB-AS1	antisense	352.828	397.746
ENSG00000088826.17	349.595	-0.151914	0.0465085	-3.26638	0.00108933	0.0426975	0.900055	SMOX	protein_coding	358.982	344.599
ENSG00000182885.16	1288.1	0.148632	0.0454972	3.26683	0.00108758	0.0426975	1.10852	ADGRG3	protein_coding	1179.41	1431.04
ENSG00000181588.16	246.649	-0.128409	0.0393093	-3.26664	0.00108834	0.0426975	0.91484	MEX3D	protein_coding	246.737	242.316
ENSG00000177830.17	492.411	-0.0696098	0.0212985	-3.2683	0.00108195	0.0426975	0.952896	CHID1	protein_coding	500.931	504.924
ENSG00000126088.13	738.725	-0.079974	0.0244736	-3.26777	0.00108398	0.0426975	0.946075	UROD	protein_coding	762.883	742.826
ENSG00000140749.8	6840.85	0.0995722	0.0304798	3.26683	0.0010876	0.0426975	1.07146	IGSF6	protein_coding	6656.47	7330.88
ENSG00000135766.8	6443.75	0.0929369	0.0284268	3.26934	0.00107799	0.0426975	1.06654	EGLN1	protein_coding	6203.24	6989.23
ENSG00000182923.17	2891.25	0.0770436	0.0235648	3.26943	0.00107763	0.0426975	1.05485	CEP63	protein_coding	2847.73	3122.6
ENSG00000232504.4	46.0928	-0.0958055	0.0293236	-3.26718	0.00108623	0.0426975	0.93575	ST3GAL5-AS1	lincRNA	48.4485	46.7151
ENSG00000224672.4	16.5844	0.0820684	0.0251334	3.26531	0.00109343	0.0427726	1.05853	RPL17P10	processed_pseudogene	16.0709	17.6152
ENSG00000144455.13	1633.62	-0.0349385	0.0107052	-3.2637	0.00109969	0.0429356	0.976073	SUMF1	protein_coding	1674.35	1704.83
ENSG00000121057.12	537.09	-0.0497802	0.0152538	-3.26345	0.00110064	0.0429356	0.966084	AKAP1	protein_coding	563	559.77
ENSG00000090013.10	10531.4	-0.17318	0.0530832	-3.26242	0.00110465	0.0430327	0.886886	BLVRB	protein_coding	10984.4	9956.37
ENSG00000130703.16	3898.34	0.0721539	0.02212	3.26194	0.00110654	0.0430468	1.05129	OSBPL2	protein_coding	3777.26	4255.34
ENSG00000122970.15	307.583	0.113755	0.0348866	3.2607	0.00111137	0.0431755	1.08204	IFT81	protein_coding	287.206	327.43
ENSG00000165406.15	12360	-0.156059	0.0478872	-3.25889	0.00111849	0.0432638	0.897473	2022-03-08	protein_coding	12630	12328.3
ENSG00000024422.11	50.615	0.132122	0.040546	3.25856	0.00111978	0.0432638	1.0959	EHD2	protein_coding	45.7574	54.3593
ENSG00000035664.11	2402.09	0.103622	0.0317946	3.25909	0.00111771	0.0432638	1.07447	DAPK2	protein_coding	2267.49	2663.13
ENSG00000243660.9	488.931	0.0689188	0.0211493	3.25869	0.0011193	0.0432638	1.04893	ZNF487	protein_coding	479.231	526.365
ENSG00000119782.13	109.144	-0.148317	0.045522	-3.25813	0.00112149	0.0432708	0.902303	FKBP1B	protein_coding	110.458	106.318
ENSG00000145982.12	726.392	-0.0516529	0.0158559	-3.25765	0.00112339	0.0432838	0.96483	FARS2	protein_coding	761.146	751.034
ENSG00000215114.8	3186.93	0.082409	0.0253	3.25727	0.00112489	0.0432838	1.05878	UBXN2B	protein_coding	3086.01	3472.58
ENSG00000236444.4	31.2701	0.105162	0.032292	3.25659	0.0011276	0.0433289	1.07561	UBE2L5	protein_coding	29.5492	33.5263
ENSG00000140961.12	54.2976	0.162053	0.0497767	3.25559	0.00113155	0.0433321	1.11888	OSGIN1	protein_coding	48.0847	58.5626
ENSG00000133606.10	31648.9	-0.162762	0.0499878	-3.25603	0.00112983	0.0433321	0.893313	MKRN1	protein_coding	32614	31060.2
ENSG00000096063.15	2809.17	0.0924485	0.0283984	3.25541	0.00113228	0.0433321	1.06618	SRPK1	protein_coding	2691.3	3058.02
ENSG00000125877.12	581.799	-0.063355	0.0194689	-3.25416	0.0011373	0.0434249	0.957036	ITPA	protein_coding	609.776	594.653
ENSG00000146859.6	4160.77	0.100525	0.0308923	3.25403	0.00113778	0.0434249	1.07216	TMEM140	protein_coding	3963.62	4563.53
ENSG00000004939.14	13988.7	-0.212357	0.0652805	-3.25299	0.00114196	0.0435253	0.863126	SLC4A1	protein_coding	14493.2	13446.3
ENSG00000196371.3	773.728	-0.0615149	0.0189167	-3.25188	0.00114646	0.043638	0.958257	FUT4	protein_coding	798.803	800.434
ENSG00000270558.1	28.8648	0.0618323	0.0190274	3.24964	0.0011555	0.0439229	1.04379	AC025449.1	processed_pseudogene	28.2288	30.7695
ENSG00000108433.16	2568.98	-0.0465118	0.0143367	-3.24426	0.00117756	0.0446413	0.968275	GOSR2	protein_coding	2663.61	2707.39
ENSG00000178719.16	657.514	-0.175903	0.0542184	-3.24434	0.00117721	0.0446413	0.885213	GRINA	protein_coding	665.291	651.633
ENSG00000104324.15	3931.44	0.079635	0.0245502	3.24376	0.00117962	0.0446596	1.05675	CPQ	protein_coding	3831.24	4279.32
ENSG00000008441.16	325.062	-0.160503	0.0495139	-3.24156	0.00118875	0.0447889	0.894713	NFIX	protein_coding	323.142	313.924
ENSG00000105321.13	551.443	0.0633752	0.0195502	3.24166	0.00118838	0.0447889	1.04491	CCDC9	protein_coding	532.389	599.477
ENSG00000029534.20	1399.29	-0.173412	0.0534989	-3.24141	0.00118938	0.0447889	0.886743	ANK1	protein_coding	1414.23	1381.97
ENSG00000135924.15	2924.07	-0.131831	0.0406576	-3.24247	0.00118498	0.0447889	0.912672	DNAJB2	protein_coding	3016.76	2878.63
ENSG00000229196.3	18.005	-0.0772439	0.0238406	-3.24001	0.00119526	0.0449504	0.947867	AC087071.1	antisense	18.6682	18.3975
ENSG00000060069.16	2339.99	0.0591309	0.0182606	3.23818	0.00120296	0.0450003	1.04184	CTDP1	protein_coding	2272.19	2573.86
ENSG00000250548.6	119.52	0.114195	0.0352636	3.23832	0.00120235	0.0450003	1.08237	LINC01303	lincRNA	113	129.278
ENSG00000224413.1	21.354	0.18597	0.0574149	3.23906	0.00119926	0.0450003	1.13758	AP001476.1	lincRNA	18.7048	23.0236
ENSG00000102445.18	2364.33	0.116594	0.0359986	3.23886	0.00120008	0.0450003	1.08417	RUBCNL	protein_coding	2276.28	2602.12
ENSG00000129187.14	595.544	-0.0482763	0.0149172	-3.23629	0.00121096	0.0452396	0.967091	DCTD	protein_coding	620.357	620.485
ENSG00000099998.17	120.711	0.187831	0.0580598	3.23513	0.00121587	0.0453629	1.13905	GGT5	protein_coding	102.529	129.791
ENSG00000260979.1	53.1382	-0.162127	0.050142	-3.23335	0.00122348	0.0454347	0.893707	AC022167.3	lincRNA	53.1876	51.1071
ENSG00000126602.10	605.64	-0.0634149	0.0196229	-3.23168	0.00123066	0.0454347	0.956996	TRAP1	protein_coding	642.213	622.428
ENSG00000270175.1	13.3383	-0.0897315	0.0277437	-3.2343	0.00121943	0.0454347	0.939698	AC023509.4	antisense	13.6979	13.6497
ENSG00000246225.6	44.3704	-0.0911475	0.0282015	-3.232	0.00122925	0.0454347	0.938776	AC006299.1	antisense	47.0435	45.127
ENSG00000135823.13	2775.12	0.0520628	0.0161003	3.23366	0.00122214	0.0454347	1.03675	STX6	protein_coding	2740.87	2998.37
ENSG00000240777.2	7.4019	0.122666	0.0379516	3.23218	0.00122848	0.0454347	1.08875	AC025572.1	lincRNA	6.87872	7.88748
ENSG00000173992.8	893.103	-0.0778198	0.0240755	-3.23232	0.00122788	0.0454347	0.947488	CCS	protein_coding	914.394	900.929
ENSG00000250539.1	151.975	-0.107439	0.0332321	-3.23298	0.00122506	0.0454347	0.928234	KRT8P33	processed_pseudogene	161.309	156.601
ENSG00000279954.1	21.0657	0.194181	0.0601346	3.22911	0.00124176	0.0455124	1.14407	BX324167.2	antisense	17.7185	22.9038
ENSG00000131876.16	769.169	-0.0550974	0.0170544	-3.23069	0.00123491	0.0455124	0.962529	SNRPA1	protein_coding	809.119	798.345
ENSG00000125375.14	1309.88	-0.039973	0.0123795	-3.22895	0.00124243	0.0455124	0.972673	ATP5S	protein_coding	1329.24	1366.54
ENSG00000203721.6	175.16	0.0942759	0.0291892	3.22982	0.0012387	0.0455124	1.06753	LINC00862	lincRNA	167.295	190.991
ENSG00000136247.14	313.349	-0.0375679	0.0116322	-3.22966	0.00123939	0.0455124	0.974296	ZDHHC4	protein_coding	319.3	323.891
ENSG00000166167.17	504.297	-0.0482037	0.0149229	-3.23019	0.00123709	0.0455124	0.96714	BTRC	protein_coding	519.67	525.091
ENSG00000277161.1	156.252	-0.058469	0.0181439	-3.22251	0.00127071	0.0456017	0.960283	PIGW	protein_coding	163.089	160.416
ENSG00000178297.13	438.27	-0.214005	0.0663733	-3.22427	0.00126295	0.0456017	0.86214	TMPRSS9	protein_coding	457.929	404.294
ENSG00000139637.13	479.586	-0.0728825	0.0226093	-3.22357	0.00126605	0.0456017	0.950737	C12orf10	protein_coding	499.465	484.575
ENSG00000066117.14	636.157	-0.0469192	0.0145464	-3.22548	0.00125763	0.0456017	0.968001	SMARCD1	protein_coding	656.444	664.376
ENSG00000068971.13	613.085	-0.122453	0.0379815	-3.22401	0.00126408	0.0456017	0.918624	PPP2R5B	protein_coding	631.416	608.8
ENSG00000089006.16	2472.25	-0.0482571	0.0149682	-3.22397	0.00126427	0.0456017	0.967104	SNX5	protein_coding	2563.17	2578.91
ENSG00000130592.15	9758.99	0.100095	0.0310399	3.22473	0.00126089	0.0456017	1.07184	LSP1	protein_coding	9004.36	11054
ENSG00000173212.4	117.815	0.156424	0.0485182	3.22404	0.00126397	0.0456017	1.11452	MAB21L3	protein_coding	107.728	126.138
ENSG00000225527.1	43.5319	-0.086072	0.026681	-3.22597	0.00125547	0.0456017	0.942084	AL450384.1	antisense	46.2975	44.9183
ENSG00000123636.17	12770.6	0.0801596	0.0248721	3.22288	0.00126911	0.0456017	1.05713	BAZ2B	protein_coding	12497.3	13837.6
ENSG00000279491.1	252.312	0.0648224	0.0201014	3.22477	0.00126075	0.0456017	1.04596	AP003733.4	TEC	250.442	270.51
ENSG00000233461.5	48.6673	0.112446	0.0348858	3.22325	0.00126744	0.0456017	1.08106	AL445524.1	antisense	46.3501	52.2414
ENSG00000178075.19	638.163	0.128442	0.039834	3.22443	0.00126224	0.0456017	1.09311	GRAMD1C	protein_coding	605.35	707.595
ENSG00000237665.1	28.5352	0.182607	0.0566581	3.22297	0.00126868	0.0456017	1.13493	GRM7-AS2	antisense	26.508	32.2214
ENSG00000159339.13	1658.61	0.13844	0.0429113	3.22619	0.00125452	0.0456017	1.10071	PADI4	protein_coding	1550.96	1847.85
ENSG00000204177.10	687.191	-0.0686828	0.0212966	-3.22506	0.00125947	0.0456017	0.953508	BMS1P1	transcribed_unprocessed_pseudogene	709.693	714.532
ENSG00000233746.1	17.1913	0.168677	0.0523725	3.22072	0.0012787	0.0456115	1.12403	LINC00656	lincRNA	15.8902	18.1924
ENSG00000007080.10	137.767	-0.095672	0.0297008	-3.22119	0.00127658	0.0456115	0.935836	CCDC124	protein_coding	140.73	137.196
ENSG00000151893.14	6647.48	0.0629358	0.0195414	3.22064	0.00127905	0.0456115	1.04459	CACUL1	protein_coding	6497.57	7204.14
ENSG00000115289.13	145.488	-0.0530729	0.0164717	-3.22206	0.00127271	0.0456115	0.963881	PCGF1	protein_coding	148.876	149.401
ENSG00000136732.15	22788.8	-0.164936	0.0511996	-3.22143	0.00127551	0.0456115	0.891968	GYPC	protein_coding	23765.1	21615.1
ENSG00000135686.12	3015.83	-0.0490288	0.0152301	-3.21921	0.00128545	0.0457817	0.966587	KLHL36	protein_coding	3151.3	3129.82
ENSG00000137270.10	62.5673	0.0998717	0.0310408	3.21743	0.00129344	0.0460084	1.07168	GCM1	protein_coding	58.8719	67.8258
ENSG00000138592.13	4135.05	0.0341875	0.0106297	3.21622	0.00129892	0.0461452	1.02398	USP8	protein_coding	4091.18	4425.34
ENSG00000069998.12	513.769	-0.054477	0.0169427	-3.21537	0.00130275	0.0461652	0.962943	HDHD5	protein_coding	531.22	530.299
ENSG00000250644.3	162.04	0.116107	0.0361087	3.21549	0.00130222	0.0461652	1.08381	AC068580.4	protein_coding	151.018	180.535
ENSG00000261359.2	30.1521	-0.0597269	0.0185797	-3.21463	0.00130613	0.0461691	0.959446	PYCARD-AS1	antisense	30.9565	30.3866
ENSG00000183421.11	23.8382	0.271993	0.0846086	3.21473	0.00130569	0.0461691	1.20748	RIPK4	protein_coding	19.8696	25.6661
ENSG00000243702.3	14.1375	0.0863434	0.0268809	3.21207	0.00131781	0.0464654	1.06168	RN7SL638P	misc_RNA	13.9268	15.4628
ENSG00000226266.6	320.717	0.0425133	0.0132342	3.21237	0.00131644	0.0464654	1.02991	AC009961.1	lincRNA	316.867	341.57
ENSG00000258752.1	8.99206	0.111721	0.0347892	3.21137	0.00132102	0.0465205	1.08052	AL357093.2	antisense	8.26773	9.35753
ENSG00000233393.1	208.067	0.102879	0.0320448	3.21047	0.0013252	0.0466097	1.07391	AP000688.2	lincRNA	199.183	223.791
ENSG00000264582.2	26.8568	0.114329	0.0356341	3.20842	0.00133466	0.0468842	1.08247	RN7SL326P	misc_RNA	25.2174	29.4791
ENSG00000198799.11	1443.66	-0.0436522	0.0136086	-3.20769	0.00133805	0.0469449	0.970196	LRIG2	protein_coding	1489.17	1510.62
ENSG00000196954.13	7713.72	0.0858238	0.0267589	3.2073	0.00133986	0.0469498	1.06129	CASP4	protein_coding	7530.54	8272.88
ENSG00000240663.3	59.381	0.0776743	0.0242245	3.20643	0.00134392	0.0469758	1.05532	RN7SL310P	misc_RNA	57.611	64.0381
ENSG00000132334.16	9460.49	0.0730273	0.0227742	3.20658	0.00134322	0.0469758	1.05192	PTPRE	protein_coding	9172.63	10379.2
ENSG00000213139.7	195.048	-0.0585374	0.0182589	-3.20596	0.00134613	0.0469947	0.960237	CRYGS	protein_coding	206.124	202.681
ENSG00000226253.1	23.7758	-0.114328	0.0356653	-3.20558	0.00134789	0.0469981	0.923812	MRPL35P3	processed_pseudogene	25.5057	24.1216
ENSG00000236352.1	13.4431	0.160683	0.0501615	3.20331	0.00135856	0.0470968	1.11782	AC005220.1	antisense	12.7506	14.6407
ENSG00000182389.19	946.725	0.118189	0.0368821	3.20451	0.00135293	0.0470968	1.08537	CACNB4	protein_coding	910.327	1034.71
ENSG00000104825.16	342.287	0.0488705	0.0152601	3.2025	0.00136239	0.0470968	1.03445	NFKBIB	protein_coding	333.81	369.309
ENSG00000117394.21	2246.26	-0.12382	0.0386469	-3.20387	0.00135593	0.0470968	0.917755	SLC2A1	protein_coding	2296.23	2197.22
ENSG00000197734.9	45.6902	0.0477732	0.0149093	3.20425	0.00135413	0.0470968	1.03367	C14orf178	protein_coding	44.5881	50.1434
ENSG00000105865.10	208.539	-0.058143	0.0181554	-3.20253	0.00136227	0.0470968	0.9605	DUS4L	protein_coding	217.455	214.416
ENSG00000183309.11	1126.71	-0.0359887	0.0112371	-3.20267	0.00136162	0.0470968	0.975363	ZNF623	protein_coding	1164.86	1179.11
ENSG00000144535.19	990.902	-0.0457913	0.0143023	-3.20168	0.00136628	0.0471735	0.968758	DIS3L2	protein_coding	1029.72	1038.69
ENSG00000237576.1	33.1612	0.0944957	0.0295209	3.20098	0.00136963	0.0472314	1.06769	LINC01888	antisense	32.3089	35.8385
ENSG00000144130.11	28.9893	0.180809	0.0565576	3.1969	0.00138912	0.0478449	1.13352	NT5DC4	protein_coding	25.7826	31.2813
ENSG00000166199.12	488.869	-0.0594567	0.0186032	-3.19605	0.00139321	0.0479276	0.959625	ALKBH3	protein_coding	515.442	501.958
ENSG00000120162.9	247.123	-0.0701148	0.021946	-3.19487	0.00139892	0.0480654	0.952562	MOB3B	protein_coding	257.471	254.619
ENSG00000243953.1	19.1094	0.17421	0.0545605	3.19297	0.00140815	0.0481525	1.12835	AC073359.1	lincRNA	17.6476	20.8675
ENSG00000136925.14	652.28	-0.0430878	0.0134928	-3.19339	0.00140611	0.0481525	0.970575	TSTD2	protein_coding	680.062	682.9
ENSG00000237181.1	50.0209	-0.0886863	0.0277753	-3.193	0.00140805	0.0481525	0.940379	AC147651.3	antisense	51.8192	51.3103
ENSG00000168575.9	712.708	-0.0451671	0.0141459	-3.19295	0.00140828	0.0481525	0.969178	SLC20A2	protein_coding	742.405	744.657
ENSG00000273188.1	29.6578	0.059846	0.0187577	3.19048	0.00142039	0.0482803	1.04235	AL022328.3	antisense	28.5584	31.6624
ENSG00000171051.8	13205.8	0.111738	0.0350243	3.1903	0.00142125	0.0482803	1.08053	FPR1	protein_coding	12532	14476.9
ENSG00000105352.10	1036.56	0.119359	0.0374132	3.19028	0.00142134	0.0482803	1.08625	CEACAM4	protein_coding	968.645	1153.4
ENSG00000224877.3	203.383	-0.105394	0.0330417	-3.18972	0.00142409	0.0482803	0.929551	NDUFAF8	protein_coding	212.549	204.394
ENSG00000249316.2	24.509	0.0653642	0.0204946	3.18934	0.00142599	0.0482803	1.04635	AF131216.2	unprocessed_pseudogene	24.2723	26.1924
ENSG00000180347.13	158.362	0.128533	0.0402918	3.19007	0.0014224	0.0482803	1.09318	ITPRID1	protein_coding	146.65	171.485
ENSG00000132768.13	145.237	-0.0624461	0.0195765	-3.18985	0.00142346	0.0482803	0.957639	DPH2	protein_coding	150.938	150.053
ENSG00000214026.10	543.597	-0.0785008	0.0246157	-3.18905	0.0014274	0.0482803	0.947041	MRPL23	protein_coding	561.817	552.76
ENSG00000121957.13	518.37	0.0705667	0.0221117	3.19137	0.00141601	0.0482803	1.05013	GPSM2	protein_coding	498.423	557.142
ENSG00000119640.8	210.145	-0.0655585	0.0205612	-3.18846	0.00143034	0.0483218	0.955575	ACYP1	protein_coding	220.641	217.978
ENSG00000111432.4	20.3662	0.22327	0.0701033	3.18488	0.00144815	0.048865	1.16738	FZD10	protein_coding	17.0572	22.2123
ENSG00000226756.1	10.2125	0.102807	0.0322919	3.18369	0.00145411	0.0489492	1.07386	AC007365.1	lincRNA	9.79176	10.755
ENSG00000118420.16	459.97	-0.0527666	0.0165736	-3.18377	0.00145368	0.0489492	0.964086	UBE3D	protein_coding	484.158	474.497
ENSG00000198933.9	241.99	0.106246	0.0334037	3.18066	0.00146941	0.0490524	1.07642	TBKBP1	protein_coding	222.648	268.911
ENSG00000149212.11	12165.8	-0.117524	0.036941	-3.1814	0.00146567	0.0490524	0.921768	SESN3	protein_coding	12456.7	12224.9
ENSG00000136869.14	17853.9	0.106157	0.0333736	3.18087	0.00146833	0.0490524	1.07636	TLR4	protein_coding	17057.1	19424.1
ENSG00000164068.15	1754.2	-0.105404	0.0331425	-3.18031	0.00147116	0.0490524	0.929545	RNF123	protein_coding	1792.16	1766.18
ENSG00000188315.7	1290.83	0.0721646	0.0226954	3.17969	0.00147431	0.0490524	1.05129	C3orf62	protein_coding	1256.73	1401.96
ENSG00000118816.9	6570.76	-0.0970583	0.0305207	-3.18009	0.00147232	0.0490524	0.934937	CCNI	protein_coding	6610.85	6747.32
ENSG00000218809.1	388.74	0.116423	0.036615	3.17965	0.00147454	0.0490524	1.08404	AL391903.1	unprocessed_pseudogene	371.941	430.534
ENSG00000072694.20	4868.19	0.0931298	0.0292633	3.18247	0.00146022	0.0490524	1.06668	FCGR2B	protein_coding	4690.54	5286.56
ENSG00000277740.1	8.77841	0.109092	0.0342932	3.18117	0.00146683	0.0490524	1.07855	RF00017	misc_RNA	8.30664	9.69328
ENSG00000231509.1	147.627	0.125345	0.0394079	3.1807	0.00146921	0.0490524	1.09077	AL162253.1	lincRNA	137.414	165.005
ENSG00000285730.1	520.885	0.100031	0.0314709	3.17854	0.00148018	0.0491821	1.0718	Z94721.3	bidirectional_promoter_lncRNA	512.368	563.572
ENSG00000259268.1	10.4091	0.185515	0.0583852	3.17742	0.0014859	0.0492001	1.13722	AC007950.1	lincRNA	9.51487	11.3122
ENSG00000125810.9	10333.1	0.117867	0.0370893	3.17792	0.00148333	0.0492001	1.08513	CD93	protein_coding	9812.72	11472.8
ENSG00000134330.18	766.907	-0.041896	0.013187	-3.17707	0.00148769	0.0492001	0.971378	IAH1	protein_coding	788.247	798.557
ENSG00000130347.12	210.059	-0.0644695	0.0202919	-3.1771	0.00148755	0.0492001	0.956297	RTN4IP1	protein_coding	220.963	216.426
ENSG00000188984.11	22.3892	0.231906	0.0730038	3.17662	0.00149	0.0492187	1.17439	AADACL3	protein_coding	18.4165	24.3848
ENSG00000281376.1	58.0785	-0.0913391	0.0287775	-3.17398	0.00150363	0.0492909	0.938651	ABALON	antisense	60.7094	56.5408
ENSG00000259562.2	94.1246	-0.0328282	0.0103425	-3.17411	0.00150296	0.0492909	0.977502	AC090607.2	transcribed_processed_pseudogene	96.4165	99.7641
ENSG00000204613.10	607.969	-0.175023	0.0551398	-3.17417	0.00150267	0.0492909	0.885753	TRIM10	protein_coding	624.755	582.971
ENSG00000079739.16	818.082	0.0554275	0.0174648	3.17367	0.00150525	0.0492909	1.03917	PGM1	protein_coding	799.995	890.755
ENSG00000200999.1	9.82091	-0.101685	0.0320198	-3.1757	0.00149476	0.0492909	0.931944	RF00284	snoRNA	10.3249	10.2559
ENSG00000132155.11	7755.08	0.074687	0.0235265	3.17459	0.00150048	0.0492909	1.05313	RAF1	protein_coding	7575.48	8399.4
ENSG00000271734.1	32.9787	0.0555914	0.0175159	3.17378	0.0015047	0.0492909	1.03929	Z98200.1	lincRNA	32.4851	36.3485
ENSG00000234921.1	8.13083	0.113825	0.0358674	3.1735	0.00150614	0.0492909	1.08209	AC006450.2	antisense	7.69794	8.83485
ENSG00000177283.7	22.7823	0.195109	0.0615029	3.17235	0.00151211	0.0494287	1.14481	FZD8	protein_coding	20.3844	24.216
ENSG00000257715.1	28.2167	0.155749	0.0491121	3.1713	0.00151756	0.0494788	1.114	AC007298.1	antisense	26.6682	30.8385
ENSG00000101158.13	955.164	-0.0515974	0.0162714	-3.17105	0.00151889	0.0494788	0.964867	NELFCD	protein_coding	990.174	1005.11
ENSG00000128849.10	49.8181	0.247952	0.0781906	3.17112	0.00151852	0.0494788	1.18752	CGNL1	protein_coding	39.4256	53.1633
ENSG00000157734.13	587.986	-0.0954494	0.0301117	-3.16985	0.00152517	0.0496261	0.935981	SNX22	protein_coding	616.341	589.735
ENSG00000103363.14	2833.85	-0.123752	0.0390602	-3.16822	0.00153373	0.0496755	0.917798	ELOB	protein_coding	2836.36	2782.26
ENSG00000175567.8	1210.34	-0.1159	0.0365752	-3.16882	0.00153057	0.0496755	0.922806	UCP2	protein_coding	1248.27	1262.57
ENSG00000260078.3	1018.71	0.119614	0.0377529	3.16833	0.00153318	0.0496755	1.08644	AC007342.3	transcribed_unprocessed_pseudogene	965.185	1102.38
ENSG00000141086.17	51.8413	0.128204	0.0404538	3.16915	0.00152885	0.0496755	1.09293	CTRL	protein_coding	47.7826	58.6243
ENSG00000116120.9	587.84	-0.0588974	0.0185946	-3.16744	0.00153788	0.049753	0.959998	FARSB	protein_coding	622.535	604.494
ENSG00000136999.4	353.327	0.139797	0.0441545	3.16609	0.00154505	0.0499276	1.10175	NOV	protein_coding	330.858	390.82

## Sheet: DE results in PDBF
	baseMean	log2FoldChange	lfcSE	stat	pvalue	padj	FoldChange	symbol	geneType	baseMean_raw.Control	baseMean_raw.Case
ENSG00000275601.1	18.0262	-0.161553	0.0196438	-8.22412	1.96621e-16	6.2791e-12	0.894062	AC011330.2	sense_intronic	21.5288	19.3487
ENSG00000086730.16	3246.57	0.179274	0.0221653	8.08808	6.06114e-16	9.67813e-12	1.13231	LAT2	protein_coding	3189.06	3707.94
ENSG00000198736.11	2871.91	0.216695	0.027535	7.86979	3.55223e-15	3.31755e-11	1.16207	MSRB1	protein_coding	2748.64	3276.17
ENSG00000170837.2	556.838	0.248158	0.0316119	7.85015	4.15538e-15	3.31755e-11	1.18769	GPR27	protein_coding	517.628	646.586
ENSG00000138411.12	518.226	0.232294	0.0298541	7.78098	7.19651e-15	4.59641e-11	1.1747	HECW2	protein_coding	492.471	603.676
ENSG00000206344.7	4178.22	0.199111	0.0256736	7.75548	8.80098e-15	4.68432e-11	1.14799	HCG27	lincRNA	4095.6	4805.31
ENSG00000134830.5	3816.1	0.182948	0.0236697	7.72919	1.08235e-14	4.93782e-11	1.1352	C5AR2	protein_coding	3712.68	4353.6
ENSG00000076662.9	7848.08	0.196686	0.0257944	7.62516	2.43739e-14	7.98765e-11	1.14606	ICAM3	protein_coding	7587.17	8889.56
ENSG00000285693.1	1116.46	0.176213	0.0231373	7.61594	2.61776e-14	7.98765e-11	1.12991	AP002381.2	lincRNA	1081.32	1270.65
ENSG00000175938.6	812.914	0.127832	0.016793	7.61218	2.69509e-14	7.98765e-11	1.09265	ORAI3	protein_coding	812.434	909.613
ENSG00000212445.1	18.842	-0.148147	0.0194686	-7.60951	2.75134e-14	7.98765e-11	0.902409	RF00554	snoRNA	21.5509	19.9526
ENSG00000006327.13	217.421	0.214365	0.0283749	7.55473	4.19719e-14	1.11698e-10	1.16019	TNFRSF12A	protein_coding	205.573	249.336
ENSG00000273306.1	19.6622	-0.14332	0.0191308	-7.49159	6.80437e-14	1.66939e-10	0.905433	AC018690.1	antisense	22.5022	20.5368
ENSG00000175137.10	2008.64	0.140067	0.0187204	7.48203	7.31846e-14	1.66939e-10	1.10196	SH3BP5L	protein_coding	1982.89	2241.78
ENSG00000174132.8	611.052	0.198709	0.0266398	7.45908	8.71295e-14	1.85499e-10	1.14767	FAM174A	protein_coding	594.073	694.95
ENSG00000189134.3	49.9585	0.246011	0.0331907	7.41206	1.24354e-13	2.41101e-10	1.18592	NKAPL	protein_coding	47.385	58.0395
ENSG00000236345.1	157.787	0.197845	0.0267075	7.40787	1.28345e-13	2.41101e-10	1.14698	AL354719.2	antisense	153.055	183.055
ENSG00000113269.13	6239.11	0.148297	0.0201855	7.34671	2.03147e-13	3.53586e-10	1.10826	RNF130	protein_coding	6180.66	7074.83
ENSG00000166130.14	1152.13	0.223943	0.0305198	7.33765	2.17381e-13	3.53586e-10	1.16792	IKBIP	protein_coding	1103.14	1334.52
ENSG00000205155.7	824.709	0.147465	0.0201139	7.33148	2.27629e-13	3.53586e-10	1.10762	PSENEN	protein_coding	823.841	926.229
ENSG00000117410.13	4090.31	0.17389	0.0237274	7.32863	2.32513e-13	3.53586e-10	1.1281	ATP6V0B	protein_coding	3995.46	4641.16
ENSG00000136156.13	24551.1	0.161263	0.0220733	7.3058	2.75626e-13	3.8279e-10	1.11827	ITM2B	protein_coding	24639.8	27897.6
ENSG00000011600.11	3167.46	0.176104	0.0241048	7.30577	2.7569e-13	3.8279e-10	1.12983	TYROBP	protein_coding	3028.68	3493.45
ENSG00000142405.21	4204.31	0.187894	0.0258435	7.27043	3.58343e-13	4.7682e-10	1.1391	NLRP12	protein_coding	4031.73	4765.55
ENSG00000145491.11	337.971	0.212942	0.0293714	7.24998	4.16847e-13	5.3248e-10	1.15905	ROPN1L	protein_coding	321.312	384.32
ENSG00000188895.11	7131.99	0.145793	0.0203828	7.15272	8.50739e-13	1.01424e-09	1.10634	MSL1	protein_coding	7157.08	8070.93
ENSG00000125735.10	2101.17	0.15638	0.0218664	7.15163	8.57508e-13	1.01424e-09	1.11449	TNFSF14	protein_coding	2058.11	2373.2
ENSG00000243646.9	1521.2	0.123644	0.0174331	7.09246	1.31753e-12	1.46815e-09	1.08948	IL10RB	protein_coding	1537.16	1702.67
ENSG00000227776.1	9.06531	-0.197661	0.0278756	-7.09082	1.33322e-12	1.46815e-09	0.871963	AKR1D1P1	processed_pseudogene	10.8783	9.40526
ENSG00000142046.14	745.527	0.165216	0.023353	7.07472	1.49756e-12	1.59415e-09	1.12133	TMEM91	protein_coding	729.595	841.857
ENSG00000175538.10	4110.55	0.166641	0.0236181	7.05566	1.71782e-12	1.76963e-09	1.12244	KCNE3	protein_coding	4070.42	4723
ENSG00000171169.8	348.549	0.10188	0.014481	7.03544	1.98628e-12	1.98224e-09	1.07317	NAIF1	protein_coding	354.473	388.32
ENSG00000126883.16	2644.17	0.10646	0.0151452	7.02927	2.07613e-12	2.00913e-09	1.07658	NUP214	protein_coding	2700.25	2980.4
ENSG00000181274.6	8031.01	0.187463	0.0267786	7.00047	2.55098e-12	2.39605e-09	1.13876	FRAT2	protein_coding	7824.46	9128.25
ENSG00000170892.10	1953.32	0.173687	0.0248558	6.98777	2.7929e-12	2.54832e-09	1.12794	TSEN34	protein_coding	1906.97	2193.63
ENSG00000257878.1	264.357	0.227053	0.0325882	6.96732	3.23033e-12	2.84233e-09	1.17044	AC007298.2	antisense	250.108	306.091
ENSG00000152213.3	1554.11	0.140762	0.0202162	6.96284	3.33487e-12	2.84233e-09	1.10249	ARL11	protein_coding	1549.9	1756.09
ENSG00000249579.2	8.58422	-0.201126	0.0288939	-6.96086	3.38214e-12	2.84233e-09	0.869871	AC113420.1	processed_pseudogene	10.1195	8.70921
ENSG00000165071.14	4055.57	0.143027	0.0205631	6.95553	3.51238e-12	2.8761e-09	1.10422	TMEM71	protein_coding	4075.81	4592.99
ENSG00000174007.7	769.038	0.20357	0.0293185	6.9434	3.82761e-12	3.05587e-09	1.15154	CEP19	protein_coding	749.533	878.028
ENSG00000166439.5	4927.28	0.0943079	0.0136042	6.93227	4.14149e-12	3.20539e-09	1.06755	RNF169	protein_coding	5109.57	5554.88
ENSG00000059804.15	8845.8	0.197084	0.0284454	6.92852	4.25266e-12	3.20539e-09	1.14638	SLC2A3	protein_coding	8741.34	10148.6
ENSG00000159128.14	4035.47	0.148148	0.0213888	6.92643	4.31601e-12	3.20539e-09	1.10815	IFNGR2	protein_coding	4017.54	4571.39
ENSG00000137575.11	11428.1	0.174748	0.0253157	6.90278	5.09944e-12	3.70115e-09	1.12877	SDCBP	protein_coding	11436.7	13173
ENSG00000167434.9	305.032	0.262632	0.0380885	6.89532	5.37441e-12	3.81404e-09	1.19967	CA4	protein_coding	279.792	350.412
ENSG00000154165.4	168.353	-0.418075	0.0607548	-6.88135	5.92863e-12	4.11589e-09	0.748422	GPR15	protein_coding	224.996	158.772
ENSG00000163464.7	8491.88	0.210702	0.0306547	6.8734	6.26903e-12	4.25961e-09	1.15725	CXCR1	protein_coding	8121.31	9592.1
ENSG00000189077.10	389.64	0.160106	0.0233452	6.85821	6.97264e-12	4.63898e-09	1.11737	TMEM120A	protein_coding	380.007	439.907
ENSG00000197622.12	13524.6	0.0998545	0.0145792	6.84911	7.43131e-12	4.84324e-09	1.07167	CDC42SE1	protein_coding	13940.3	15264.9
ENSG00000100865.14	473.979	0.0701511	0.0102502	6.84387	7.7081e-12	4.90378e-09	1.04983	CINP	protein_coding	487.383	521.347
ENSG00000172349.17	11090.4	0.105477	0.0154196	6.84046	7.89391e-12	4.90378e-09	1.07585	IL16	protein_coding	11516.2	12593.5
ENSG00000038219.12	12588.9	0.136446	0.0199517	6.83882	7.98486e-12	4.90378e-09	1.09919	BOD1L1	protein_coding	12780.2	14335.4
ENSG00000132965.9	3803.28	0.214001	0.0313104	6.83481	8.21125e-12	4.94766e-09	1.1599	ALOX5AP	protein_coding	3604.13	4355.05
ENSG00000101150.17	2905.42	0.135205	0.0197902	6.83193	8.37783e-12	4.95455e-09	1.09825	TPD52L2	protein_coding	2879.58	3270.22
ENSG00000135766.8	5202.83	0.160378	0.0234965	6.82561	8.75552e-12	5.00106e-09	1.11758	EGLN1	protein_coding	5192.59	5870.75
ENSG00000057704.12	2650.05	0.182992	0.0268106	6.82537	8.76967e-12	5.00106e-09	1.13524	TMCC3	protein_coding	2570.87	3008.85
ENSG00000165879.8	2355.73	0.175838	0.0257845	6.81954	9.13342e-12	5.11712e-09	1.12962	FRAT1	protein_coding	2270.65	2651.23
ENSG00000113303.11	641.869	0.22056	0.0323676	6.81421	9.47812e-12	5.21868e-09	1.16519	BTNL8	protein_coding	615.104	745.249
ENSG00000244650.2	16.0948	-0.144706	0.0212615	-6.80601	1.0034e-11	5.42068e-09	0.904564	AC025566.1	lincRNA	18.2102	16.5961
ENSG00000138678.10	1179.73	0.199976	0.0293921	6.80374	1.01938e-11	5.42068e-09	1.14868	GPAT3	protein_coding	1151.58	1358.67
ENSG00000143226.13	20642	0.177308	0.026069	6.80149	1.03542e-11	5.42068e-09	1.13077	FCGR2A	protein_coding	20068.3	23133.5
ENSG00000111058.7	676.384	0.211585	0.031137	6.7953	1.08085e-11	5.56725e-09	1.15796	ACSS3	protein_coding	653.358	776.634
ENSG00000272953.1	79.846	0.192368	0.0283243	6.79163	1.10871e-11	5.62011e-09	1.14264	AC092171.4	lincRNA	76.3429	90.275
ENSG00000197579.7	2608.67	0.197703	0.0291262	6.78781	1.13845e-11	5.6807e-09	1.14687	TOPORS	protein_coding	2575.93	2984.55
ENSG00000136404.15	922.262	0.156336	0.0230432	6.78449	1.16494e-11	5.72344e-09	1.11445	TM6SF1	protein_coding	925.808	1061.3
ENSG00000113532.12	8057.88	0.151149	0.0222929	6.78011	1.20086e-11	5.81053e-09	1.11045	ST8SIA4	protein_coding	8196.92	9167.66
ENSG00000177125.5	3020.95	0.132557	0.0195624	6.77613	1.23435e-11	5.88341e-09	1.09624	ZBTB34	protein_coding	3095.09	3450.85
ENSG00000140749.8	6217.42	0.178121	0.0263555	6.75842	1.39508e-11	6.49246e-09	1.13141	IGSF6	protein_coding	6177.23	7051.23
ENSG00000163041.9	18746.1	0.159924	0.0236658	6.75762	1.40279e-11	6.49246e-09	1.11723	H3F3A	protein_coding	18812.2	21275.6
ENSG00000158887.15	189.016	0.155357	0.0230525	6.73929	1.59162e-11	7.1845e-09	1.1137	MPZ	protein_coding	183.801	211.538
ENSG00000116701.14	22722	0.160435	0.0238078	6.73877	1.59731e-11	7.1845e-09	1.11762	NCF2	protein_coding	22616	25945.8
ENSG00000148572.15	1182.36	0.160113	0.0237692	6.73617	1.62617e-11	7.21274e-09	1.11737	NRBF2	protein_coding	1186.27	1360.54
ENSG00000011198.9	5386.5	0.188802	0.0280367	6.73412	1.64927e-11	7.21498e-09	1.13982	ABHD5	protein_coding	5268.97	6265.45
ENSG00000132825.6	1132.78	0.129716	0.019271	6.73117	1.68304e-11	7.26323e-09	1.09408	PPP1R3D	protein_coding	1139.08	1285.55
ENSG00000092200.12	230.888	0.190038	0.0282707	6.72206	1.79174e-11	7.62923e-09	1.14079	RPGRIP1	protein_coding	224.013	267.237
ENSG00000273253.2	120.364	0.187686	0.027937	6.71819	1.84e-11	7.73162e-09	1.13894	AL022328.4	antisense	114.9	135.538
ENSG00000238713.1	17.017	-0.135838	0.0202484	-6.70857	1.96544e-11	8.11969e-09	0.910141	RF00019	misc_RNA	19.9912	18.4474
ENSG00000173535.14	8352.93	0.194913	0.0290601	6.70725	1.9832e-11	8.11969e-09	1.14466	TNFRSF10C	protein_coding	8028.43	9432.38
ENSG00000002919.14	839.11	0.119512	0.0178664	6.68918	2.24422e-11	9.04623e-09	1.08637	SNX11	protein_coding	851.754	955.593
ENSG00000260916.7	6432.18	0.17685	0.0264453	6.6874	2.27174e-11	9.04623e-09	1.13041	CCPG1	protein_coding	6389.25	7357.14
ENSG00000160588.9	3778.58	0.168066	0.0251385	6.68563	2.29937e-11	9.04623e-09	1.12355	MPZL3	protein_coding	3773.14	4348.12
ENSG00000105327.17	523.526	0.158322	0.0236862	6.68414	2.32281e-11	9.04623e-09	1.11599	BBC3	protein_coding	512.595	585.878
ENSG00000160179.18	1012.27	0.230605	0.0345568	6.67321	2.50269e-11	9.62933e-09	1.17333	ABCG1	protein_coding	964.626	1175.05
ENSG00000119471.14	1641.34	0.168311	0.0252409	6.6682	2.5896e-11	9.84509e-09	1.12374	HSDL2	protein_coding	1639.69	1872.58
ENSG00000170871.11	4932.82	0.126951	0.0190566	6.66178	2.70536e-11	1.00713e-08	1.09198	KIAA0232	protein_coding	4984.71	5614.75
ENSG00000230673.3	38.921	0.0920249	0.0138146	6.66141	2.71216e-11	1.00713e-08	1.06587	PABPC1P3	processed_pseudogene	40.2389	43.3947
ENSG00000113719.15	5224.33	0.155804	0.0234267	6.65069	2.91726e-11	1.0621e-08	1.11404	ERGIC1	protein_coding	5079.45	5821.02
ENSG00000111348.8	8059.8	0.10992	0.0165288	6.65021	2.92672e-11	1.0621e-08	1.07917	ARHGDIB	protein_coding	8234.47	9006.58
ENSG00000276136.1	299.797	0.120116	0.0181102	6.6325	3.30059e-11	1.18432e-08	1.08682	AC016957.2	lincRNA	298.889	331.787
ENSG00000125827.8	5164.91	0.134278	0.0202606	6.62755	3.41307e-11	1.21107e-08	1.09754	TMX4	protein_coding	5206.56	5855.45
ENSG00000206957.2	8.63548	0.199258	0.030171	6.60428	3.99459e-11	1.39893e-08	1.14811	RF00019	misc_RNA	8.22124	9.48289
ENSG00000111737.11	929.903	0.108505	0.0164328	6.60297	4.03012e-11	1.39893e-08	1.07811	RAB35	protein_coding	938.956	1036.69
ENSG00000140932.9	1635.5	0.243296	0.0368843	6.5962	4.21831e-11	1.44851e-08	1.18369	CMTM2	protein_coding	1568.72	1919.43
ENSG00000238160.1	1208.1	0.184988	0.028088	6.58603	4.51758e-11	1.53236e-08	1.13681	AC116366.2	antisense	1166.31	1375.18
ENSG00000102010.14	238.532	0.291307	0.0442401	6.58469	4.55845e-11	1.53236e-08	1.22375	BMX	protein_coding	218.367	279.053
ENSG00000174718.11	32760.5	0.168689	0.0256266	6.58256	4.62413e-11	1.53825e-08	1.12404	KIAA1551	protein_coding	32604.5	37260.9
ENSG00000163513.17	9298.97	0.0891899	0.0135706	6.57229	4.95459e-11	1.63118e-08	1.06377	TGFBR2	protein_coding	9634.16	10302
ENSG00000259717.1	50.1515	0.245961	0.0374815	6.56221	5.30154e-11	1.71373e-08	1.18588	LINC00677	lincRNA	46.208	56.7947
ENSG00000101265.15	19380.8	0.147347	0.022455	6.56189	5.31294e-11	1.71373e-08	1.10753	RASSF2	protein_coding	19255.3	22063.2
ENSG00000256229.7	675.236	0.137543	0.0209656	6.5604	5.36632e-11	1.71373e-08	1.10003	ZNF486	protein_coding	687.469	762.576
ENSG00000285667.1	316.677	0.108756	0.0165892	6.55584	5.53283e-11	1.74805e-08	1.0783	AC012291.2	lincRNA	324.783	354.657
ENSG00000122694.15	4704.65	0.143933	0.0219595	6.55449	5.58326e-11	1.74805e-08	1.10491	GLIPR2	protein_coding	4720.31	5357.7
ENSG00000198189.10	4817.27	0.160649	0.0245234	6.55084	5.72154e-11	1.76979e-08	1.11779	HSD17B11	protein_coding	4846.08	5511.6
ENSG00000166446.14	245.542	-0.110826	0.0169206	-6.54975	5.76353e-11	1.76979e-08	0.926058	CDYL2	protein_coding	277.825	266.096
ENSG00000204592.8	62973.9	0.141327	0.0215867	6.54692	5.87356e-11	1.7864e-08	1.10292	HLA-E	protein_coding	63064.7	70453.1
ENSG00000155099.7	1321.86	0.159335	0.024348	6.54406	5.98723e-11	1.8038e-08	1.11677	PIP4P2	protein_coding	1319.84	1516.17
ENSG00000128594.7	1230.91	0.188574	0.0288226	6.54257	6.04692e-11	1.80475e-08	1.13964	LRRC4	protein_coding	1185.06	1389.99
ENSG00000236806.1	8.00313	-0.197161	0.0302312	-6.52177	6.94839e-11	2.0546e-08	0.872265	RPL7AP15	processed_pseudogene	9.06637	8.11447
ENSG00000168040.4	1077.56	0.129002	0.0197903	6.51845	7.10396e-11	2.05527e-08	1.09354	FADD	protein_coding	1075.84	1212.96
ENSG00000270077.1	64.1547	0.356129	0.0546387	6.5179	7.12987e-11	2.05527e-08	1.27999	AP003117.1	sense_intronic	57.8518	75.0895
ENSG00000204386.10	746.074	0.117937	0.0180951	6.51761	7.14374e-11	2.05527e-08	1.08518	NEU1	protein_coding	752.803	839.897
ENSG00000115828.16	2318.47	0.217765	0.0334274	6.51457	7.28983e-11	2.07858e-08	1.16293	QPCT	protein_coding	2223.07	2677.64
ENSG00000189067.12	15340.1	0.174538	0.0268019	6.51217	7.40744e-11	2.09342e-08	1.1286	LITAF	protein_coding	15086.4	17332.2
ENSG00000197852.10	3299.82	0.177049	0.0272219	6.50391	7.82566e-11	2.19221e-08	1.13057	INKA2	protein_coding	3188.19	3699.51
ENSG00000277791.4	2548.69	0.144052	0.0221586	6.50095	7.98167e-11	2.2123e-08	1.105	PSMB3	protein_coding	2577.84	2899.9
ENSG00000062282.14	3560.74	0.191162	0.0294141	6.49899	8.08591e-11	2.2123e-08	1.14168	DGAT2	protein_coding	3450.3	4058.03
ENSG00000174529.7	107.363	0.053637	0.00825358	6.49864	8.10519e-11	2.2123e-08	1.03788	TMEM81	protein_coding	114.588	119.782
ENSG00000139946.9	3259.24	0.13272	0.0204302	6.49625	8.2345e-11	2.22241e-08	1.09636	PELI2	protein_coding	3291.1	3708.36
ENSG00000214812.3	29.8258	0.222892	0.0343154	6.4954	8.28139e-11	2.22241e-08	1.16707	AL137792.1	processed_pseudogene	28.1881	33.1895
ENSG00000167851.14	2425.18	0.136562	0.0210348	6.4922	8.45941e-11	2.25126e-08	1.09928	CD300A	protein_coding	2462.29	2749.45
ENSG00000163563.7	30453.9	0.19909	0.0306888	6.48737	8.73486e-11	2.30535e-08	1.14797	MNDA	protein_coding	29943.9	35076.1
ENSG00000240616.1	10.5372	-0.169063	0.0260771	-6.4832	8.97976e-11	2.35056e-08	0.88942	RPS6P25	processed_pseudogene	12.1969	11.0632
ENSG00000139644.12	10867	0.105511	0.0163125	6.4681	9.92401e-11	2.57661e-08	1.07588	TMBIM6	protein_coding	11240.7	12285.1
ENSG00000182923.17	2140.44	0.125538	0.0194238	6.46311	1.02572e-10	2.64165e-08	1.09091	CEP63	protein_coding	2164.72	2425.25
ENSG00000134873.9	756.353	0.17628	0.0272914	6.45917	1.05276e-10	2.68959e-08	1.12997	CLDN10	protein_coding	756.96	870.091
ENSG00000163162.8	17398	0.146099	0.0226543	6.44905	1.12555e-10	2.85273e-08	1.10657	RNF149	protein_coding	17388.3	19701.3
ENSG00000005893.15	7257.19	0.147921	0.0229472	6.44616	1.14716e-10	2.86257e-08	1.10797	LAMP2	protein_coding	7342.79	8320.09
ENSG00000040633.12	907.221	0.108072	0.0167653	6.44614	1.14736e-10	2.86257e-08	1.07779	PHF23	protein_coding	923.17	1009.89
ENSG00000115325.13	803.511	0.123051	0.0191193	6.43596	1.22696e-10	3.0368e-08	1.08904	DOK1	protein_coding	812.02	907.166
ENSG00000173281.4	3847.69	0.172492	0.0268061	6.43482	1.23621e-10	3.0368e-08	1.127	PPP1R3B	protein_coding	3824.67	4352.53
ENSG00000185947.14	2482.28	0.195172	0.0303577	6.42909	1.28367e-10	3.12932e-08	1.14486	ZNF267	protein_coding	2477.98	2827.34
ENSG00000173171.14	1394.78	0.155117	0.0241794	6.41523	1.40613e-10	3.40187e-08	1.11351	MTX1	protein_coding	1384.13	1588.38
ENSG00000253981.5	203.257	0.218804	0.0341315	6.41063	1.44923e-10	3.47979e-08	1.16377	ALG1L13P	transcribed_unprocessed_pseudogene	192.354	235.033
ENSG00000225591.2	22.6082	-0.113136	0.0176519	-6.40927	1.4622e-10	3.48473e-08	0.924576	BX248409.1	processed_pseudogene	26.2257	24.3263
ENSG00000088298.12	1219.93	0.093832	0.0146434	6.40781	1.47626e-10	3.49216e-08	1.0672	EDEM2	protein_coding	1254.1	1360.4
ENSG00000100266.18	4728.8	0.146283	0.0228439	6.40358	1.51774e-10	3.56389e-08	1.10671	PACSIN2	protein_coding	4709.52	5322.48
ENSG00000171051.8	11947.7	0.200974	0.0313971	6.40106	1.54301e-10	3.5968e-08	1.14947	FPR1	protein_coding	11658	13740.7
ENSG00000154957.13	697.506	0.0769487	0.0120288	6.39702	1.58439e-10	3.66648e-08	1.05478	ZNF18	protein_coding	728.819	786.249
ENSG00000204427.11	1176.96	0.111881	0.0174967	6.39439	1.6119e-10	3.70332e-08	1.08064	ABHD16A	protein_coding	1196.94	1317.36
ENSG00000284930.1	739.236	0.179433	0.0280704	6.39224	1.63468e-10	3.72883e-08	1.13244	AC005280.2	lincRNA	724.237	849.482
ENSG00000174125.7	10028	0.174655	0.0273391	6.38847	1.67558e-10	3.77253e-08	1.12869	TLR1	protein_coding	9999.31	11461.2
ENSG00000167193.7	2129.5	0.101118	0.0158286	6.38829	1.67747e-10	3.77253e-08	1.0726	CRK	protein_coding	2172.69	2377.9
ENSG00000135378.3	958.019	0.191038	0.0299309	6.38262	1.74088e-10	3.88776e-08	1.14158	PRRG4	protein_coding	936.796	1092.31
ENSG00000103194.15	2815.43	0.130877	0.0205212	6.37766	1.79818e-10	3.98518e-08	1.09496	USP10	protein_coding	2867.26	3196.54
ENSG00000120656.11	563.491	0.105221	0.0165033	6.37579	1.82022e-10	3.98518e-08	1.07566	TAF12	protein_coding	578	633.432
ENSG00000140044.12	887.259	0.146627	0.0229979	6.37565	1.82194e-10	3.98518e-08	1.10698	JDP2	protein_coding	871.082	1004.49
ENSG00000103569.9	11571.3	0.189816	0.0297774	6.37451	1.83554e-10	3.98761e-08	1.14062	AQP9	protein_coding	11258.6	13063.3
ENSG00000100365.14	1428.86	0.185438	0.0291681	6.35756	2.04978e-10	4.39987e-08	1.13716	NCF4	protein_coding	1377.59	1613.75
ENSG00000228242.6	608.282	0.180586	0.0284059	6.35733	2.05286e-10	4.39987e-08	1.13334	AC093495.1	antisense	595.06	684.849
ENSG00000203814.6	3250.17	0.145614	0.0229267	6.35131	2.13495e-10	4.54531e-08	1.1062	HIST2H2BF	protein_coding	3152.19	3601.58
ENSG00000260078.3	810.703	0.213685	0.0336557	6.34913	2.1653e-10	4.57938e-08	1.15965	AC007342.3	transcribed_unprocessed_pseudogene	791.389	929.572
ENSG00000091317.7	10387.2	0.168873	0.0266469	6.33745	2.33599e-10	4.90789e-08	1.12418	CMTM6	protein_coding	10419	11870.7
ENSG00000105352.10	916.743	0.202278	0.0319246	6.33612	2.35624e-10	4.91807e-08	1.15051	CEACAM4	protein_coding	864.728	1048.34
ENSG00000169403.11	7341.29	0.169757	0.0268059	6.33284	2.40696e-10	4.99132e-08	1.12487	PTAFR	protein_coding	7229.14	8206.18
ENSG00000243660.9	384.24	0.115693	0.0183238	6.3138	2.72267e-10	5.60958e-08	1.0835	ZNF487	protein_coding	387.522	429.582
ENSG00000223969.5	30.5059	0.220821	0.035036	6.30267	2.92566e-10	5.98916e-08	1.1654	AC002456.1	antisense	29.2279	35
ENSG00000181852.17	1726.68	0.0719371	0.0114373	6.28967	3.18147e-10	6.47136e-08	1.05113	RNF41	protein_coding	1794.3	1920.96
ENSG00000199331.1	16.5651	-0.129487	0.0205934	-6.28781	3.21981e-10	6.50788e-08	0.914156	RF00019	misc_RNA	19.531	17.725
ENSG00000179456.10	1864.65	0.106432	0.016936	6.28437	3.29186e-10	6.61168e-08	1.07656	ZBTB18	protein_coding	1928.94	2108.38
ENSG00000105835.11	54894	0.216407	0.0344438	6.2829	3.32311e-10	6.63272e-08	1.16184	NAMPT	protein_coding	53917.8	63279.1
ENSG00000082996.19	4510.61	0.149539	0.0238141	6.27944	3.39784e-10	6.73976e-08	1.10922	RNF13	protein_coding	4582.66	5132.28
ENSG00000118308.15	4653.13	0.121678	0.0193809	6.27823	3.42442e-10	6.75055e-08	1.088	LRMP	protein_coding	4774.32	5269.71
ENSG00000110876.9	4509.82	0.145292	0.0231471	6.27692	3.45339e-10	6.76589e-08	1.10595	SELPLG	protein_coding	4413.43	4982.14
ENSG00000255112.2	3225.16	0.131109	0.0208938	6.27504	3.49547e-10	6.78768e-08	1.09514	CHMP1B	protein_coding	3250.25	3657.92
ENSG00000158156.7	358.064	0.165341	0.0263512	6.27453	3.50702e-10	6.78768e-08	1.12143	XKR8	protein_coding	351.412	402.725
ENSG00000007944.14	2335.08	0.126819	0.0202282	6.26941	3.62416e-10	6.97214e-08	1.09188	MYLIP	protein_coding	2399.29	2661.93
ENSG00000213722.8	598.302	0.13615	0.0217455	6.26106	3.8236e-10	7.29105e-08	1.09897	DDAH2	protein_coding	598.288	669.683
ENSG00000140350.15	4422.43	0.103002	0.0164524	6.26058	3.83559e-10	7.29105e-08	1.07401	ANP32A	protein_coding	4541.92	4961.3
ENSG00000136999.4	337.462	0.248681	0.0397539	6.25552	3.96204e-10	7.48684e-08	1.18812	NOV	protein_coding	321.754	389.149
ENSG00000132475.10	22860.8	0.152436	0.0243934	6.24907	4.12899e-10	7.75644e-08	1.11144	H3F3B	protein_coding	22982	26009.9
ENSG00000104870.12	3744.38	0.154524	0.0247515	6.24299	4.29283e-10	8.01705e-08	1.11305	FCGRT	protein_coding	3687.7	4219.48
ENSG00000180539.7	407.025	0.150558	0.0241377	6.23748	4.44687e-10	8.25644e-08	1.11	C9orf139	antisense	391.721	453.857
ENSG00000136630.12	510.926	0.180018	0.028891	6.23094	4.63659e-10	8.55893e-08	1.1329	HLX	protein_coding	495.686	568.787
ENSG00000048392.11	2234.42	0.168452	0.0270395	6.22984	4.66909e-10	8.56938e-08	1.12385	RRM2B	protein_coding	2252.35	2570.02
ENSG00000240682.9	1006.94	0.0970438	0.0156031	6.21951	4.98705e-10	9.10065e-08	1.06958	ISY1	protein_coding	1040.07	1129.93
ENSG00000273112.1	33.5136	0.265951	0.0427911	6.21511	5.12889e-10	9.23814e-08	1.20243	AL590385.2	processed_transcript	32.0332	38.6118
ENSG00000199135.1	49.9183	0.170394	0.0274176	6.21479	5.1392e-10	9.23814e-08	1.12537	MIR101-1	miRNA	49.8053	57.0816
ENSG00000065559.14	2193.92	0.120742	0.0194314	6.21375	5.1736e-10	9.23814e-08	1.08729	MAP2K4	protein_coding	2238.45	2486.81
ENSG00000164463.12	6440.94	0.120704	0.0194258	6.21361	5.1781e-10	9.23814e-08	1.08727	CREBRF	protein_coding	6653.16	7340.12
ENSG00000125753.13	5952.98	0.148625	0.0239278	6.21143	5.25062e-10	9.31547e-08	1.10851	VASP	protein_coding	5906.27	6677.22
ENSG00000249055.1	14.3728	-0.137243	0.0221111	-6.20694	5.40255e-10	9.50582e-08	0.909255	TBCAP3	transcribed_processed_pseudogene	16.9823	15.4105
ENSG00000269858.5	3019.98	0.0974994	0.0157092	6.20651	5.41744e-10	9.50582e-08	1.06992	EGLN2	protein_coding	3097.03	3362.74
ENSG00000273559.4	1036.46	0.0862577	0.0139023	6.20458	5.48429e-10	9.53759e-08	1.06161	CWC25	protein_coding	1075.54	1165.06
ENSG00000182782.7	707.207	0.211583	0.0341028	6.20427	5.49528e-10	9.53759e-08	1.15796	HCAR2	protein_coding	730.695	806.838
ENSG00000130313.6	417.592	0.11428	0.0184386	6.1979	5.72211e-10	9.85454e-08	1.08244	PGLS	protein_coding	415.98	462.263
ENSG00000236463.1	8.99557	-0.175702	0.0283509	-6.19742	5.73961e-10	9.85454e-08	0.885336	LINC00427	lincRNA	10.2389	9.30658
ENSG00000163219.11	8718.3	0.101127	0.0163223	6.1956	5.80624e-10	9.8757e-08	1.07261	ARHGAP25	protein_coding	8935.92	9763.39
ENSG00000171940.13	7006.38	0.0926396	0.0149536	6.19514	5.82348e-10	9.8757e-08	1.06632	ZNF217	protein_coding	7211.8	7836.26
ENSG00000225873.4	162.019	0.203165	0.0327974	6.19456	5.84471e-10	9.8757e-08	1.15122	C3orf86	transcribed_unitary_pseudogene	153.487	181.299
ENSG00000024862.17	667.071	0.116408	0.0187981	6.19253	5.92045e-10	9.90583e-08	1.08403	CCDC28A	protein_coding	687.81	761.763
ENSG00000049541.10	350.854	0.0917768	0.0148217	6.19205	5.93869e-10	9.90583e-08	1.06568	RFC2	protein_coding	359.055	390.186
ENSG00000206991.1	4.57321	-0.241074	0.0389357	-6.1916	5.9556e-10	9.90583e-08	0.846115	RNU6-610P	snRNA	5.55973	4.78026
ENSG00000272933.1	85.5449	0.171482	0.0277	6.19068	5.99052e-10	9.91229e-08	1.12621	AL391121.1	lincRNA	82.3628	95.6487
ENSG00000122862.4	27989.3	0.217244	0.0350982	6.1896	6.03172e-10	9.92903e-08	1.16251	SRGN	protein_coding	27431.9	32338.7
ENSG00000187808.4	265.831	0.152266	0.0246193	6.18484	6.21666e-10	1.0181e-07	1.11131	SOWAHD	protein_coding	264.115	300.312
ENSG00000136869.14	14530.4	0.17439	0.0282011	6.1838	6.25775e-10	1.0196e-07	1.12849	TLR4	protein_coding	14303.9	16666.9
ENSG00000015475.18	2097.81	0.113364	0.0183404	6.1811	6.36584e-10	1.03194e-07	1.08175	BID	protein_coding	2132.95	2349.87
ENSG00000196954.13	6532.68	0.134987	0.0218466	6.17886	6.4566e-10	1.04137e-07	1.09808	CASP4	protein_coding	6741.22	7443.9
ENSG00000159882.12	662.128	0.150178	0.0243103	6.17755	6.51025e-10	1.04328e-07	1.10971	ZNF230	protein_coding	668.254	755.186
ENSG00000139370.11	3049.03	0.117547	0.0190298	6.17698	6.53397e-10	1.04328e-07	1.08489	SLC15A4	protein_coding	3095.39	3466.65
ENSG00000163297.16	5872.94	0.108454	0.0175599	6.1762	6.56642e-10	1.04328e-07	1.07807	ANTXR2	protein_coding	6094.98	6617.97
ENSG00000139112.10	2652.15	0.143175	0.0232193	6.16623	6.9939e-10	1.0978e-07	1.10433	GABARAPL1	protein_coding	2629.53	3017.3
ENSG00000127954.12	10929.3	0.18813	0.0305118	6.1658	7.01267e-10	1.0978e-07	1.13929	STEAP4	protein_coding	10814.6	12574.5
ENSG00000137414.5	3444.37	0.15871	0.0257403	6.1658	7.01274e-10	1.0978e-07	1.11629	FAM8A1	protein_coding	3489.1	3947.33
ENSG00000112303.13	18097.8	0.227165	0.036911	6.15441	7.53595e-10	1.17395e-07	1.17053	VNN2	protein_coding	17533.6	20903.5
ENSG00000204261.8	1949.41	0.1049	0.0170568	6.15003	7.74681e-10	1.20094e-07	1.07542	PSMB8-AS1	lincRNA	2011.35	2201.64
ENSG00000280237.3	169.436	-0.201006	0.0327122	-6.14469	8.01202e-10	1.23606e-07	0.869943	MIR4697HG	TEC	206.973	178.988
ENSG00000198223.16	2072.67	0.139612	0.0227641	6.13299	8.62448e-10	1.32415e-07	1.10161	CSF2RA	protein_coding	2038.47	2367.28
ENSG00000186529.15	4014.04	0.20167	0.0329224	6.12564	9.03223e-10	1.38012e-07	1.15003	CYP4F3	protein_coding	3806.7	4691.19
ENSG00000204438.10	548.054	0.0955695	0.0156068	6.12357	9.15009e-10	1.39147e-07	1.06849	GPANK1	protein_coding	556.677	606.984
ENSG00000230257.2	213.919	0.227589	0.0371718	6.12264	9.20386e-10	1.39301e-07	1.17088	NFE4	protein_coding	202.144	246.939
ENSG00000188186.10	1328.92	0.143703	0.0234743	6.12171	9.25759e-10	1.39453e-07	1.10474	LAMTOR4	protein_coding	1323.12	1515.09
ENSG00000100439.10	495.863	0.119348	0.0195035	6.11932	9.39778e-10	1.409e-07	1.08624	ABHD4	protein_coding	492.228	543.042
ENSG00000132155.11	5906.02	0.112174	0.0183395	6.11655	9.56225e-10	1.42696e-07	1.08086	RAF1	protein_coding	5977.36	6701.98
ENSG00000235863.3	677.507	0.110568	0.0180863	6.11335	9.75625e-10	1.44914e-07	1.07965	B3GALT4	protein_coding	679.265	751.888
ENSG00000229954.1	5.44896	-0.218177	0.0356948	-6.1123	9.8208e-10	1.45198e-07	0.859651	MTND2P2	processed_pseudogene	6.59513	5.72632
ENSG00000271259.1	17.3445	0.126939	0.0207761	6.10986	9.97175e-10	1.4675e-07	1.09197	AC010201.1	lincRNA	17.5243	19.7276
ENSG00000008294.20	7033.39	0.108345	0.0177376	6.1082	1.00764e-09	1.47153e-07	1.07799	SPAG9	protein_coding	7230.86	7992.7
ENSG00000006652.13	4621.83	0.156606	0.0256396	6.10796	1.00913e-09	1.47153e-07	1.11466	IFRD1	protein_coding	4593	5279.41
ENSG00000235430.1	16.5379	-0.12582	0.020612	-6.10422	1.03302e-09	1.49952e-07	0.916483	ZSWIM5P1	processed_pseudogene	19.4513	17.7829
ENSG00000183283.15	9246.77	0.109603	0.0179585	6.10316	1.03994e-09	1.50274e-07	1.07893	DAZAP2	protein_coding	9255.72	10162.1
ENSG00000201470.1	13.4138	-0.141628	0.0232088	-6.10235	1.0452e-09	1.50353e-07	0.906495	RNY4P7	misc_RNA	15.2124	14.0776
ENSG00000025039.14	960.641	0.136697	0.0224269	6.09523	1.09279e-09	1.56109e-07	1.09939	RRAGD	protein_coding	962.091	1094.99
ENSG00000086300.15	2480.03	0.155493	0.025512	6.09491	1.09499e-09	1.56109e-07	1.1138	SNX10	protein_coding	2520.83	2840.41
ENSG00000113360.16	645.344	-0.0929783	0.0152653	-6.09085	1.12316e-09	1.59414e-07	0.937585	DROSHA	protein_coding	743.031	700.393
ENSG00000204160.11	4775	0.155602	0.0255542	6.08909	1.13558e-09	1.60463e-07	1.11389	ZDHHC18	protein_coding	4711.62	5370.5
ENSG00000185905.3	2573.49	0.126234	0.0207649	6.07918	1.20802e-09	1.69281e-07	1.09144	C16orf54	protein_coding	2578.1	2861.51
ENSG00000109220.10	1454.43	0.10734	0.0176572	6.0791	1.20858e-09	1.69281e-07	1.07724	CHIC2	protein_coding	1482.72	1634.34
ENSG00000245848.2	1404.06	0.142782	0.0235195	6.07081	1.27268e-09	1.7711e-07	1.10403	CEBPA	protein_coding	1366.82	1578.29
ENSG00000134815.18	1602.46	0.154487	0.0254514	6.06987	1.28013e-09	1.7711e-07	1.11303	DHX34	protein_coding	1550.46	1771.02
ENSG00000087589.16	1352.51	0.132214	0.0217825	6.06975	1.28111e-09	1.7711e-07	1.09597	CASS4	protein_coding	1359.37	1522.31
ENSG00000111802.13	2216.57	0.141869	0.0233777	6.06856	1.29061e-09	1.77654e-07	1.10333	TDP2	protein_coding	2269.63	2521.67
ENSG00000257094.1	17.373	0.128357	0.0211551	6.06745	1.29959e-09	1.77665e-07	1.09305	AC016957.1	processed_pseudogene	16.8562	18.8895
ENSG00000051620.10	3522.48	0.113889	0.0187714	6.06717	1.30182e-09	1.77665e-07	1.08214	HEBP2	protein_coding	3604.94	3971.83
ENSG00000123810.7	312.298	0.136866	0.0225733	6.06318	1.33457e-09	1.81353e-07	1.09951	B9D2	protein_coding	308.927	346.889
ENSG00000161533.11	4730.36	0.146467	0.0241595	6.0625	1.3402e-09	1.81353e-07	1.10686	ACOX1	protein_coding	4730.76	5408.35
ENSG00000089693.10	1114.23	0.118507	0.019557	6.05958	1.36481e-09	1.83282e-07	1.08561	MLF2	protein_coding	1095.71	1214.93
ENSG00000022277.12	3684.89	0.124438	0.0205372	6.05916	1.36835e-09	1.83282e-07	1.09008	RTF2	protein_coding	3748.37	4183.2
ENSG00000271888.1	17.8349	0.22295	0.0367978	6.05877	1.37168e-09	1.83282e-07	1.16712	AL136162.1	lincRNA	16.8606	20.2763
ENSG00000213523.10	500.475	0.0956825	0.0158093	6.05228	1.42812e-09	1.9003e-07	1.06857	SRA1	protein_coding	512.498	565.329
ENSG00000169228.13	1800.48	0.13808	0.0228325	6.04751	1.471e-09	1.93758e-07	1.10044	RAB24	protein_coding	1824.75	2047.26
ENSG00000273141.1	59.1221	0.262077	0.0433368	6.04744	1.47168e-09	1.93758e-07	1.1992	AP001269.4	antisense	55.2633	68.7605
ENSG00000064225.12	951.072	0.133271	0.0220402	6.04671	1.47831e-09	1.93758e-07	1.09678	ST3GAL6	protein_coding	967.942	1097.14
ENSG00000249662.6	232.147	0.200674	0.0331885	6.04648	1.48041e-09	1.93758e-07	1.14923	LINC02218	protein_coding	222.358	270.98
ENSG00000100612.13	2347.34	0.126907	0.0209945	6.04477	1.4962e-09	1.95025e-07	1.09195	DHRS7	protein_coding	2389.78	2665.45
ENSG00000134996.11	4936.01	0.127249	0.0211144	6.02662	1.67419e-09	2.17339e-07	1.09221	OSTF1	protein_coding	5059.12	5658.08
ENSG00000217128.11	4344.09	0.118204	0.0196212	6.02429	1.69853e-09	2.19606e-07	1.08538	FNIP1	protein_coding	4451.84	4926.48
ENSG00000070731.10	666.498	0.181504	0.0301978	6.0105	1.84947e-09	2.38005e-07	1.13407	ST6GALNAC2	protein_coding	645.801	747.254
ENSG00000146859.6	3796.91	0.156724	0.0260774	6.00996	1.85575e-09	2.38005e-07	1.11475	TMEM140	protein_coding	3800.12	4269.73
ENSG00000213347.10	956.734	0.172602	0.0287535	6.00283	1.93911e-09	2.47556e-07	1.12709	MXD3	protein_coding	926.175	1070.21
ENSG00000105856.13	4878.05	0.12124	0.020199	6.00228	1.94572e-09	2.47556e-07	1.08767	HBP1	protein_coding	4994.83	5526.12
ENSG00000003402.19	30348.1	0.1005	0.016754	5.99853	1.99108e-09	2.52322e-07	1.07214	CFLAR	protein_coding	30893.9	33896.9
ENSG00000111647.12	2577.99	0.117402	0.0195969	5.99084	2.08757e-09	2.63504e-07	1.08478	UHRF1BP1L	protein_coding	2624.08	2914.96
ENSG00000235119.1	25.237	0.102504	0.0171293	5.98412	2.17569e-09	2.73545e-07	1.07364	AL138895.1	lincRNA	26.115	28.6224
ENSG00000100368.13	6907.89	0.161693	0.027048	5.97799	2.25903e-09	2.82146e-07	1.1186	CSF2RB	protein_coding	6869.51	7739.41
ENSG00000284948.1	2168.15	0.169039	0.0282777	5.9778	2.26176e-09	2.82146e-07	1.12431	AC107959.4	lincRNA	2104.23	2459.27
ENSG00000128383.12	4653.09	0.184125	0.0308155	5.97507	2.29989e-09	2.85785e-07	1.13613	APOBEC3A	protein_coding	4554.43	5360.68
ENSG00000119979.17	1649.97	0.110691	0.0185331	5.97261	2.33494e-09	2.87327e-07	1.07975	FAM45A	protein_coding	1682.38	1853.87
ENSG00000182195.7	6.56573	-0.199844	0.0334643	-5.97188	2.34539e-09	2.87327e-07	0.870644	LDOC1	protein_coding	7.41372	6.47368
ENSG00000125910.5	2406.2	0.151254	0.0253284	5.97173	2.34754e-09	2.87327e-07	1.11053	S1PR4	protein_coding	2358.84	2663.64
ENSG00000174885.12	907.216	0.213856	0.0358128	5.97151	2.35068e-09	2.87327e-07	1.15978	NLRP6	protein_coding	863.542	997.978
ENSG00000225568.1	9.25838	-0.165254	0.0276758	-5.97105	2.35727e-09	2.87327e-07	0.891772	AC093155.1	processed_pseudogene	10.8562	9.68026
ENSG00000239998.5	1817.71	0.145939	0.024451	5.96864	2.39234e-09	2.89825e-07	1.10645	LILRA2	protein_coding	1788.57	2043.21
ENSG00000132334.16	8040.06	0.105397	0.01766	5.96808	2.40054e-09	2.89825e-07	1.07579	PTPRE	protein_coding	8165.88	9048.31
ENSG00000126945.8	2677.87	0.170026	0.0284906	5.96778	2.405e-09	2.89825e-07	1.12508	HNRNPH2	protein_coding	2696.24	3050.06
ENSG00000269961.1	49.8033	0.154882	0.0259845	5.96057	2.51366e-09	3.01782e-07	1.11333	AC010359.1	lincRNA	49.281	56.3105
ENSG00000239407.5	44.3353	-0.075809	0.0127201	-5.95976	2.52606e-09	3.02133e-07	0.94881	Z68871.1	lincRNA	50.1593	47.6395
ENSG00000213719.8	8129.85	0.143825	0.0241415	5.9576	2.55962e-09	3.04213e-07	1.10483	CLIC1	protein_coding	8213.61	9239.74
ENSG00000250616.2	438.794	0.185888	0.0312028	5.95742	2.5625e-09	3.04213e-07	1.13752	AC012645.1	antisense	432.491	506.941
ENSG00000189159.15	1587.04	0.133429	0.0224053	5.95527	2.59647e-09	3.07105e-07	1.0969	JPT1	protein_coding	1609.65	1791.01
ENSG00000163931.15	9009.05	0.140032	0.0235596	5.94372	2.78624e-09	3.28334e-07	1.10193	TKT	protein_coding	8944.91	10107.6
ENSG00000242085.1	12.0127	-0.144199	0.0242659	-5.94244	2.80818e-09	3.29703e-07	0.904882	RPS20P33	processed_pseudogene	13.9226	12.9487
ENSG00000243364.7	119.793	0.0906017	0.0152659	5.9349	2.94032e-09	3.43953e-07	1.06481	EFNA4	protein_coding	122.219	133.158
ENSG00000136167.13	41096.1	0.121263	0.0204395	5.93277	2.9786e-09	3.4716e-07	1.08769	LCP1	protein_coding	41690.8	46198.5
ENSG00000111052.7	2082.77	0.180028	0.0303679	5.92823	3.06226e-09	3.55612e-07	1.13291	LIN7A	protein_coding	2071.1	2394.96
ENSG00000117862.12	1115.1	0.115003	0.0194075	5.92573	3.10909e-09	3.58657e-07	1.08298	TXNDC12	protein_coding	1131.95	1242.91
ENSG00000171310.10	4523.24	0.107075	0.0180697	5.92563	3.11094e-09	3.58657e-07	1.07704	CHST11	protein_coding	4569.36	5065.19
ENSG00000173825.6	113.089	0.196712	0.0332075	5.92373	3.14724e-09	3.61536e-07	1.14608	TIGD3	protein_coding	108.409	128.262
ENSG00000109016.17	534.797	0.0783305	0.0132251	5.92285	3.16401e-09	3.6216e-07	1.0558	DHRS7B	protein_coding	541.836	594.162
ENSG00000276900.1	549.739	0.182398	0.0308182	5.91851	3.2487e-09	3.70525e-07	1.13477	AC023157.3	antisense	533.777	622.864
ENSG00000135404.11	2646.55	0.138081	0.0233385	5.91645	3.28963e-09	3.73859e-07	1.10044	CD63	protein_coding	2679.13	3046.39
ENSG00000163191.5	776.69	0.159711	0.0270303	5.90858	3.45079e-09	3.90783e-07	1.11706	S100A11	protein_coding	746.75	853.439
ENSG00000270276.2	1853.02	0.142323	0.0240976	5.90611	3.50276e-09	3.95268e-07	1.10368	HIST2H4B	protein_coding	1847.26	2102.54
ENSG00000124731.12	5036.48	0.188087	0.0318539	5.90468	3.53336e-09	3.97317e-07	1.13925	TREM1	protein_coding	4892.03	5785.06
ENSG00000143622.10	2282.91	0.127855	0.0216653	5.90137	3.60502e-09	4.03952e-07	1.09267	RIT1	protein_coding	2322.93	2575.96
ENSG00000116954.7	688.952	0.0701233	0.0118866	5.89933	3.64971e-09	4.06783e-07	1.04981	RRAGC	protein_coding	728.586	779.361
ENSG00000277493.1	11.6742	-0.143732	0.0243653	-5.89906	3.65576e-09	4.06783e-07	0.905174	AC139769.3	unprocessed_pseudogene	13.9137	12.6013
ENSG00000237886.1	99.1143	0.17344	0.0294113	5.89703	3.70092e-09	4.10378e-07	1.12774	NALT1	antisense	94.9381	112.505
ENSG00000173110.7	3679.62	0.165702	0.0281064	5.8955	3.7355e-09	4.12779e-07	1.12171	HSPA6	protein_coding	3637.99	4185.65
ENSG00000177191.2	438.592	0.180563	0.0306325	5.89449	3.75848e-09	4.13886e-07	1.13333	B3GNT8	protein_coding	414.604	482.268
ENSG00000143878.9	2658.64	0.153915	0.0261267	5.89111	3.83601e-09	4.20972e-07	1.11258	RHOB	protein_coding	2581.19	3019.82
ENSG00000012660.13	5412.67	0.0952737	0.0162002	5.88101	4.07764e-09	4.45957e-07	1.06827	ELOVL5	protein_coding	5636.98	6035.14
ENSG00000140995.16	2636.03	0.127538	0.0216885	5.88043	4.09197e-09	4.45997e-07	1.09243	DEF8	protein_coding	2638.68	2981.51
ENSG00000058799.14	577.001	0.0938792	0.0159677	5.87931	4.1198e-09	4.47503e-07	1.06724	YIPF1	protein_coding	596.108	649.261
ENSG00000109103.11	1444.28	0.111734	0.0190244	5.87319	4.27477e-09	4.62762e-07	1.08053	UNC119	protein_coding	1459.48	1624.15
ENSG00000072694.20	3714.09	0.139817	0.0238128	5.87151	4.31854e-09	4.649e-07	1.10177	FCGR2B	protein_coding	3760.22	4194.39
ENSG00000104763.18	8618.86	0.13582	0.0231329	5.87131	4.32364e-09	4.649e-07	1.09872	ASAH1	protein_coding	8739.4	9883.25
ENSG00000177981.10	1019.64	0.063111	0.0107568	5.86711	4.43467e-09	4.75239e-07	1.04472	ASB8	protein_coding	1059.59	1118.17
ENSG00000276259.1	21.4477	-0.108332	0.0184671	-5.8662	4.45906e-09	4.76255e-07	0.92766	AC009118.3	antisense	23.9093	22.3921
ENSG00000138433.15	1301.99	0.119236	0.020345	5.86072	4.60873e-09	4.906e-07	1.08616	CIR1	protein_coding	1342.28	1480.38
ENSG00000181192.11	1254.61	0.0780528	0.0133239	5.85811	4.68172e-09	4.96713e-07	1.05559	DHTKD1	protein_coding	1289.21	1384.87
ENSG00000137161.16	1086.11	0.112869	0.0192843	5.8529	4.83086e-09	5.10839e-07	1.08138	CNPY3	protein_coding	1094.58	1210.31
ENSG00000153310.19	6579.23	0.103517	0.017689	5.85206	4.85533e-09	5.11733e-07	1.07439	FAM49B	protein_coding	6790.02	7455.35
ENSG00000272911.1	19.6371	0.115071	0.0196706	5.8499	4.91863e-09	5.16699e-07	1.08303	AC005696.3	lincRNA	19.7389	21.6592
ENSG00000182117.5	1132.34	0.132862	0.0227153	5.84903	4.94462e-09	5.17726e-07	1.09647	NOP10	protein_coding	1152.68	1291.79
ENSG00000169230.9	1354.58	0.122909	0.0210223	5.84658	5.01784e-09	5.23676e-07	1.08893	PRELID1	protein_coding	1380.46	1533.81
ENSG00000132010.15	220.417	0.152124	0.0260291	5.84438	5.08448e-09	5.28902e-07	1.1112	ZNF20	protein_coding	221.024	249.282
ENSG00000146094.14	1479.39	0.173944	0.0297794	5.84108	5.18648e-09	5.37761e-07	1.12814	DOK3	protein_coding	1416.22	1645.9
ENSG00000051523.10	9292.77	0.143445	0.0245631	5.83986	5.22439e-09	5.39938e-07	1.10454	CYBA	protein_coding	9147.64	10370.9
ENSG00000108946.14	10905.1	0.131683	0.0225513	5.83928	5.24262e-09	5.40074e-07	1.09557	PRKAR1A	protein_coding	11139.4	12431.4
ENSG00000162413.16	1570.87	0.128382	0.0219944	5.83702	5.31426e-09	5.45694e-07	1.09307	KLHL21	protein_coding	1562.75	1754.75
ENSG00000128311.13	394.49	0.156349	0.0268054	5.83275	5.4521e-09	5.58054e-07	1.11446	TST	protein_coding	386.35	441.025
ENSG00000146826.16	701.458	0.139917	0.0239972	5.83055	5.52449e-09	5.63657e-07	1.10184	C7orf43	protein_coding	689.476	780.354
ENSG00000135482.6	631.446	0.0637685	0.0109403	5.8288	5.58287e-09	5.67799e-07	1.04519	ZC3H10	protein_coding	659.396	701.107
ENSG00000110934.10	5140.29	0.0803199	0.0137825	5.82767	5.62083e-09	5.68787e-07	1.05725	BIN2	protein_coding	5315.64	5737.08
ENSG00000238260.1	56.133	0.142637	0.0244768	5.82745	5.62821e-09	5.68787e-07	1.10392	AL513320.1	antisense	54.2633	61.6829
ENSG00000161638.10	3552.99	0.12051	0.0206836	5.82636	5.66493e-09	5.70693e-07	1.08712	ITGA5	protein_coding	3553.04	3961.21
ENSG00000242247.10	1247.34	0.0853604	0.0146533	5.82535	5.69927e-09	5.72346e-07	1.06095	ARFGAP3	protein_coding	1303.03	1404.12
ENSG00000174130.12	4706.26	0.132587	0.0227657	5.82395	5.74721e-09	5.75352e-07	1.09626	TLR6	protein_coding	4781.23	5367.31
ENSG00000183255.11	4454.72	0.0939886	0.0161482	5.82037	5.87183e-09	5.85225e-07	1.06732	PTTG1IP	protein_coding	4581.98	4987.2
ENSG00000100938.17	1649.09	0.0956023	0.0164263	5.82006	5.88249e-09	5.85225e-07	1.06851	GMPR2	protein_coding	1708.06	1859.01
ENSG00000274213.1	67.0453	0.234796	0.0403888	5.8134	6.12151e-09	6.07113e-07	1.17674	AC015912.3	lincRNA	61.3363	76.1171
ENSG00000103490.13	1492.91	0.139747	0.0240483	5.81109	6.20673e-09	6.12822e-07	1.10171	PYCARD	protein_coding	1484.67	1679.35
ENSG00000123505.15	4429.43	0.108995	0.0187572	5.8108	6.21745e-09	6.12822e-07	1.07848	AMD1	protein_coding	4551.25	4999.6
ENSG00000220867.1	11.901	-0.141954	0.0244335	-5.80981	6.25452e-09	6.14571e-07	0.906291	HSPE1P26	processed_pseudogene	13.8938	12.6013
ENSG00000235750.9	3869.59	0.105517	0.0181636	5.80929	6.27369e-09	6.14571e-07	1.07588	KIAA0040	protein_coding	3981.26	4301.61
ENSG00000135828.11	2524.42	0.105283	0.0181252	5.80864	6.29809e-09	6.15075e-07	1.07571	RNASEL	protein_coding	2618.64	2850.44
ENSG00000115165.9	8343.11	0.0971345	0.0167255	5.80758	6.33829e-09	6.17114e-07	1.06965	CYTIP	protein_coding	8705.52	9355.59
ENSG00000276317.1	103.989	0.130826	0.0225354	5.80536	6.42289e-09	6.23449e-07	1.09492	AL357033.3	antisense	105.394	116.767
ENSG00000198604.10	5900.1	0.133411	0.0229836	5.80463	6.45084e-09	6.24266e-07	1.09688	BAZ1A	protein_coding	6014.35	6650.67
ENSG00000010539.11	1192.34	0.0775328	0.0133616	5.80267	6.52682e-09	6.2971e-07	1.05521	ZNF200	protein_coding	1249.51	1324.3
ENSG00000163131.10	37198.4	0.155909	0.0268804	5.80011	6.62709e-09	6.36269e-07	1.11412	CTSS	protein_coding	37150.2	42205.5
ENSG00000197208.5	1120.17	0.16877	0.0290986	5.79992	6.63465e-09	6.36269e-07	1.1241	SLC22A4	protein_coding	1082.55	1245.95
ENSG00000151893.14	5061.56	0.0937476	0.016171	5.79727	6.74013e-09	6.44449e-07	1.06714	CACUL1	protein_coding	5227.68	5703.87
ENSG00000157036.12	353.247	-0.0960748	0.0165762	-5.79593	6.79423e-09	6.47682e-07	0.935575	EXOG	protein_coding	404.958	380.941
ENSG00000100461.17	3519.13	0.0910425	0.015712	5.79445	6.85453e-09	6.51486e-07	1.06514	RBM23	protein_coding	3599.62	3936.28
ENSG00000185825.16	810.967	0.0879239	0.0152001	5.78441	7.27682e-09	6.87856e-07	1.06284	BCAP31	protein_coding	844.861	913.813
ENSG00000246263.2	582.365	0.14691	0.0253979	5.78433	7.28027e-09	6.87856e-07	1.1072	UBR5-AS1	antisense	585.308	667.314
ENSG00000102218.5	2674.94	0.142662	0.0246679	5.78332	7.32423e-09	6.89968e-07	1.10394	RP2	protein_coding	2715.44	3062.73
ENSG00000277463.1	12.1881	0.143475	0.0248216	5.78025	7.45895e-09	7.00593e-07	1.10456	AC080038.2	lincRNA	12.2876	13.8816
ENSG00000197329.11	7123.96	0.134619	0.0233096	5.77526	7.68336e-09	7.19036e-07	1.0978	PELI1	protein_coding	7150.19	8052.66
ENSG00000182149.20	3285.64	0.0661468	0.0114542	5.77489	7.70034e-09	7.19036e-07	1.04692	IST1	protein_coding	3462.66	3687.95
ENSG00000108179.13	801.647	0.112769	0.0195332	5.77316	7.77967e-09	7.23923e-07	1.0813	PPIF	protein_coding	820.706	908.845
ENSG00000261055.1	32.8763	0.232215	0.040226	5.77277	7.79801e-09	7.23923e-07	1.17464	AL450468.2	lincRNA	31.2456	37.5105
ENSG00000116903.7	2090.54	0.110963	0.0192324	5.76956	7.94772e-09	7.34547e-07	1.07995	EXOC8	protein_coding	2161.18	2371.61
ENSG00000187531.13	1225.87	0.0917513	0.0159033	5.76934	7.95846e-09	7.34547e-07	1.06566	SIRT7	protein_coding	1254.42	1369.76
ENSG00000143119.13	10777.9	0.0810229	0.0140521	5.76589	8.12278e-09	7.47022e-07	1.05777	CD53	protein_coding	11318.4	12132.8
ENSG00000163964.14	1059.85	0.123241	0.0213755	5.76553	8.1404e-09	7.47022e-07	1.08918	PIGX	protein_coding	1071.38	1194.27
ENSG00000156675.15	9300.55	0.136461	0.0236754	5.76385	8.22176e-09	7.52326e-07	1.09921	RAB11FIP1	protein_coding	9356.04	10508.1
ENSG00000067560.10	7533.98	0.0978674	0.0169826	5.76282	8.27202e-09	7.54763e-07	1.07019	RHOA	protein_coding	7798.57	8554.75
ENSG00000241721.1	100.48	0.237043	0.0411381	5.76213	8.30609e-09	7.55712e-07	1.17857	SUMO1P1	processed_pseudogene	97.0133	116.842
ENSG00000129055.12	619.673	0.118975	0.0206521	5.76092	8.36581e-09	7.58983e-07	1.08596	ANAPC13	protein_coding	636.852	703.616
ENSG00000180353.10	15852	0.118478	0.020578	5.75752	8.5361e-09	7.72239e-07	1.08559	HCLS1	protein_coding	16220.4	18118
ENSG00000080815.18	4448.02	0.0911653	0.0158416	5.75481	8.67376e-09	7.82476e-07	1.06523	PSEN1	protein_coding	4576.4	5010.89
ENSG00000153560.11	1321.02	-0.0730589	0.0127104	-5.74798	9.03149e-09	8.12453e-07	0.95062	UBP1	protein_coding	1497.28	1443.85
ENSG00000119669.4	1100.08	0.147465	0.0256579	5.74734	9.06559e-09	8.1323e-07	1.10762	IRF2BPL	protein_coding	1060.25	1221.23
ENSG00000269246.1	34.3734	0.230553	0.0401184	5.74681	9.09447e-09	8.13535e-07	1.17328	AC011445.2	lincRNA	32.7102	39.1618
ENSG00000144909.7	1911.4	0.0960257	0.0167227	5.74224	9.3431e-09	8.33441e-07	1.06883	OSBPL11	protein_coding	1974.72	2159.12
ENSG00000180549.7	1428.98	0.167723	0.0292266	5.73871	9.54029e-09	8.48661e-07	1.12328	FUT7	protein_coding	1390.66	1609.17
ENSG00000233892.1	12.894	-0.135672	0.0236447	-5.73795	9.5832e-09	8.50109e-07	0.910246	PAIP1P1	processed_pseudogene	14.5487	13.7013
ENSG00000171049.8	5684.59	0.196323	0.0342231	5.73657	9.6612e-09	8.54655e-07	1.14577	FPR2	protein_coding	5554.77	6561.87
ENSG00000177885.14	7185.85	0.106485	0.0185726	5.73346	9.84024e-09	8.68088e-07	1.0766	GRB2	protein_coding	7320.02	8019.21
ENSG00000151151.5	2435.45	0.172837	0.0301875	5.72547	1.03149e-08	9.07456e-07	1.12727	IPMK	protein_coding	2437.47	2780.36
ENSG00000154845.15	5470.03	0.129177	0.022571	5.72314	1.04571e-08	9.1744e-07	1.09367	PPP4R1	protein_coding	5515.94	6244.76
ENSG00000169413.2	713.804	0.20049	0.0350427	5.7213	1.05711e-08	9.24896e-07	1.14909	RNASE6	protein_coding	704.206	804.718
ENSG00000065615.13	5290.98	0.0981258	0.0171574	5.71915	1.07058e-08	9.34122e-07	1.07038	CYB5R4	protein_coding	5446.94	5961.56
ENSG00000169967.16	10161.1	0.118762	0.0207691	5.71819	1.07662e-08	9.36839e-07	1.0858	MAP3K2	protein_coding	10479.8	11559.3
ENSG00000163154.5	1551.95	0.105852	0.0185141	5.71739	1.0817e-08	9.38695e-07	1.07613	TNFAIP8L2	protein_coding	1588.16	1740.15
ENSG00000196544.7	460.22	0.108476	0.0189795	5.71544	1.09422e-08	9.46989e-07	1.07809	BORCS6	protein_coding	463.166	510.632
ENSG00000131669.9	757.18	0.153578	0.0269024	5.70872	1.13828e-08	9.82455e-07	1.11232	NINJ1	protein_coding	732.923	840.259
ENSG00000136280.16	3284.84	0.0827814	0.0145068	5.70637	1.15412e-08	9.93443e-07	1.05906	CCM2	protein_coding	3401.88	3649.36
ENSG00000142166.12	3945.84	0.101003	0.0177029	5.70543	1.16047e-08	9.96225e-07	1.07252	IFNAR1	protein_coding	4085.59	4396.11
ENSG00000137312.14	2031.25	0.14231	0.0249452	5.70493	1.16388e-08	9.96475e-07	1.10367	FLOT1	protein_coding	2013.43	2240.39
ENSG00000130449.5	2039.54	0.0837365	0.014682	5.70336	1.17467e-08	1.00286e-06	1.05976	ZSWIM6	protein_coding	2108.19	2290.18
ENSG00000154928.17	2549.15	0.153799	0.0269684	5.70293	1.17762e-08	1.00286e-06	1.1125	EPHB1	protein_coding	2570.2	2915.1
ENSG00000168092.13	1914.49	0.0638592	0.0112013	5.70104	1.19077e-08	1.01136e-06	1.04526	PAFAH1B2	protein_coding	2020.83	2144.23
ENSG00000107957.16	239.144	-0.156997	0.0275504	-5.69852	1.20852e-08	1.02372e-06	0.89689	SH3PXD2A	protein_coding	274.186	246.809
ENSG00000148450.12	355.125	0.132943	0.0233321	5.69784	1.21334e-08	1.02508e-06	1.09653	MSRB2	protein_coding	354.254	401.039
ENSG00000115271.10	11628.5	0.18446	0.0323777	5.69715	1.21827e-08	1.02522e-06	1.13639	GCA	protein_coding	11703.6	13480.6
ENSG00000233852.1	4.11854	-0.235671	0.0413682	-5.69692	1.21993e-08	1.02522e-06	0.84929	AC005304.1	lincRNA	4.96903	4.22237
ENSG00000170876.7	2612.05	0.103154	0.0181091	5.69623	1.22482e-08	1.02663e-06	1.07412	TMEM43	protein_coding	2673.61	2916.91
ENSG00000118564.14	12920.5	0.148376	0.0260525	5.69526	1.23182e-08	1.02979e-06	1.10832	FBXL5	protein_coding	13110.1	14800.1
ENSG00000278540.4	594.93	-0.091058	0.015992	-5.69397	1.24121e-08	1.03494e-06	0.938834	ACACA	protein_coding	677.936	643.145
ENSG00000258284.1	9.50391	-0.15594	0.0273973	-5.69178	1.25718e-08	1.04552e-06	0.897548	POLR2KP1	processed_pseudogene	11.0664	9.99079
ENSG00000101084.17	2226.42	0.126882	0.0223145	5.68606	1.3e-08	1.0757e-06	1.09193	RAB5IF	protein_coding	2230.59	2507.12
ENSG00000203644.3	270.447	0.143903	0.0253082	5.68604	1.3002e-08	1.0757e-06	1.10489	AC083799.1	sense_intronic	273.018	311.7
ENSG00000113732.8	3367.35	0.127741	0.0224805	5.68229	1.329e-08	1.09668e-06	1.09258	ATP6V0E1	protein_coding	3456.3	3833
ENSG00000135363.11	1776.03	0.1253	0.0220547	5.68134	1.33644e-08	1.09849e-06	1.09073	LMO2	protein_coding	1785.5	2021.53
ENSG00000116741.7	13552.2	0.202415	0.0356293	5.68113	1.33807e-08	1.09849e-06	1.15062	RGS2	protein_coding	13006.3	15610.2
ENSG00000266579.1	9.02151	-0.157449	0.0277216	-5.67967	1.34957e-08	1.10379e-06	0.896609	FO680682.1	lincRNA	10.8009	9.81184
ENSG00000143384.12	48124.5	0.119244	0.0209958	5.67943	1.35143e-08	1.10379e-06	1.08617	MCL1	protein_coding	49233.3	54227
ENSG00000007392.16	1020.63	-0.0829662	0.0146094	-5.67896	1.35515e-08	1.104e-06	0.944115	LUC7L	protein_coding	1162.59	1109.41
ENSG00000155265.10	182.433	-0.135531	0.023879	-5.67573	1.38102e-08	1.12221e-06	0.910335	GOLGA7B	protein_coding	214.33	191.483
ENSG00000119397.16	2716.46	-0.0846302	0.0149247	-5.67049	1.42389e-08	1.15411e-06	0.943026	CNTRL	protein_coding	3119.08	2952.55
ENSG00000105851.10	3698.16	0.0793083	0.0139884	5.66957	1.4316e-08	1.15742e-06	1.05651	PIK3CG	protein_coding	3820.25	4139.54
ENSG00000165886.4	66.1986	0.170298	0.0300522	5.66675	1.45531e-08	1.17362e-06	1.12529	UBTD1	protein_coding	63.8009	73.45
ENSG00000138449.10	2749.67	0.153662	0.0271189	5.66623	1.45973e-08	1.17422e-06	1.11239	SLC40A1	protein_coding	2790.1	3109.35
ENSG00000151465.13	1511.74	0.104922	0.0185306	5.66208	1.49549e-08	1.19996e-06	1.07544	CDC123	protein_coding	1572.54	1705.85
ENSG00000130703.16	2985.4	0.103416	0.0182677	5.66115	1.50361e-08	1.20345e-06	1.07431	OSBPL2	protein_coding	3030.37	3362.57
ENSG00000093134.14	2701.56	0.182526	0.0322451	5.66057	1.50872e-08	1.20453e-06	1.13487	VNN3	protein_coding	2637.63	3121.46
ENSG00000253438.3	462.457	-0.122611	0.0216639	-5.65967	1.51664e-08	1.20783e-06	0.918524	PCAT1	antisense	533.686	487.126
ENSG00000204152.10	498.341	-0.0786983	0.0139069	-5.65896	1.52291e-08	1.20981e-06	0.946912	TIMM23B	protein_coding	562.889	538.537
ENSG00000181409.12	786.585	0.212218	0.0375212	5.65596	1.54978e-08	1.2281e-06	1.15847	AATK	protein_coding	728.562	868.558
ENSG00000130724.8	1092.31	0.127447	0.0225483	5.65215	1.58451e-08	1.2506e-06	1.09236	CHMP2A	protein_coding	1097.59	1230.34
ENSG00000104324.15	3152.23	0.113639	0.0201059	5.65199	1.58601e-08	1.2506e-06	1.08195	CPQ	protein_coding	3211.31	3602.74
ENSG00000196549.10	13114.1	0.198916	0.0352201	5.64778	1.6253e-08	1.27842e-06	1.14784	MME	protein_coding	12680.7	15200.3
ENSG00000200769.1	12.6523	-0.132521	0.0234661	-5.64735	1.62939e-08	1.27849e-06	0.912236	RF00019	misc_RNA	14.8363	13.7197
ENSG00000160570.13	1973.97	0.0993829	0.0176001	5.64672	1.63535e-08	1.28002e-06	1.07132	DEDD2	protein_coding	1993.74	2167.95
ENSG00000070770.8	769.049	-0.0705742	0.0125071	-5.64273	1.67371e-08	1.30685e-06	0.952259	CSNK2A2	protein_coding	868.761	838.533
ENSG00000062716.12	12370.7	0.118539	0.0210491	5.63155	1.78593e-08	1.39107e-06	1.08563	VMP1	protein_coding	12511.8	14031.8
ENSG00000164674.15	1154	0.118334	0.0210213	5.62926	1.80988e-08	1.40629e-06	1.08548	SYTL3	protein_coding	1156.83	1307.4
ENSG00000188404.8	18094.9	0.14637	0.026006	5.6283	1.81994e-08	1.41067e-06	1.10678	SELL	protein_coding	18157.8	20223
ENSG00000115561.15	2713.58	0.0833403	0.0148095	5.62749	1.82847e-08	1.41385e-06	1.05947	CHMP3	protein_coding	2810.92	3029.73
ENSG00000168461.12	4637.05	0.134146	0.0238478	5.6251	1.85406e-08	1.42827e-06	1.09744	RAB31	protein_coding	4692.64	5259.35
ENSG00000023902.13	2841.64	0.0980495	0.0174313	5.62491	1.85606e-08	1.42827e-06	1.07033	PLEKHO1	protein_coding	2919.67	3171.43
ENSG00000160712.12	9464.69	0.126724	0.0225335	5.62378	1.86824e-08	1.43195e-06	1.09181	IL6R	protein_coding	9548.76	10671.8
ENSG00000143815.14	6976.12	0.133009	0.0236517	5.62364	1.8698e-08	1.43195e-06	1.09658	LBR	protein_coding	7126.44	8029.48
ENSG00000111728.10	497.541	-0.133715	0.0238019	-5.61783	1.93375e-08	1.47605e-06	0.911481	ST8SIA1	protein_coding	578.131	520.186
ENSG00000282602.1	59.4647	0.173888	0.0309543	5.61757	1.93664e-08	1.47605e-06	1.12809	Z82244.2	lincRNA	58.1637	67.2158
ENSG00000241685.9	612.189	0.0674777	0.0120257	5.61113	2.01007e-08	1.52837e-06	1.04788	ARPC1A	protein_coding	633.677	677.804
ENSG00000186205.12	1329.82	0.16794	0.0299623	5.60505	2.08195e-08	1.57927e-06	1.12345	2022-03-01	protein_coding	1285.79	1516.7
ENSG00000132581.9	940.889	0.0938374	0.0167523	5.60146	2.12548e-08	1.60847e-06	1.06721	SDF2	protein_coding	975.907	1066.88
ENSG00000158615.8	4454.25	0.0810164	0.0144664	5.60033	2.13949e-08	1.61366e-06	1.05776	PPP1R15B	protein_coding	4648.62	4977.47
ENSG00000174021.10	643.661	0.114486	0.020444	5.59997	2.14385e-08	1.61366e-06	1.08259	GNG5	protein_coding	650.518	716.132
ENSG00000279873.2	276.133	0.124454	0.0222252	5.59968	2.1475e-08	1.61366e-06	1.09009	LINC01126	lincRNA	277.978	308.199
ENSG00000177156.10	10804.5	0.153217	0.0273717	5.59764	2.17289e-08	1.6267e-06	1.11205	TALDO1	protein_coding	10638.7	12123.6
ENSG00000100985.7	834.181	0.284923	0.0509058	5.59707	2.18003e-08	1.6267e-06	1.21835	MMP9	protein_coding	738.046	961.508
ENSG00000256235.2	273.969	0.131978	0.0235799	5.59706	2.18015e-08	1.6267e-06	1.0958	SMIM3	protein_coding	274.803	307.097
ENSG00000084110.10	1994.61	0.155485	0.0278072	5.59154	2.25063e-08	1.67244e-06	1.1138	HAL	protein_coding	1975.02	2300.31
ENSG00000272562.1	121.184	0.111415	0.0199259	5.59144	2.25191e-08	1.67244e-06	1.08029	AL512343.2	antisense	123.597	136.471
ENSG00000072401.14	2247.87	0.180539	0.0322972	5.58994	2.27155e-08	1.68096e-06	1.13331	UBE2D1	protein_coding	2259.17	2571.84
ENSG00000213462.4	2374.32	0.131149	0.0234623	5.58975	2.27392e-08	1.68096e-06	1.09517	ERV3-1	protein_coding	2365.05	2676.01
ENSG00000111229.15	5627.42	0.134469	0.0240656	5.58762	2.30208e-08	1.69785e-06	1.09769	ARPC3	protein_coding	5743.78	6383.92
ENSG00000226310.1	9.40516	-0.153176	0.0274173	-5.58683	2.31254e-08	1.70163e-06	0.899269	AL022157.1	antisense	10.9004	9.99342
ENSG00000273812.1	33.0033	0.220531	0.0394871	5.58489	2.33854e-08	1.71604e-06	1.16516	BX640514.2	lincRNA	30.1792	38.0079
ENSG00000277443.2	2361.02	0.168636	0.0301968	5.58456	2.34287e-08	1.71604e-06	1.124	MARCKS	protein_coding	2324.77	2641.67
ENSG00000149923.13	1482.07	0.114854	0.0205681	5.58411	2.34902e-08	1.71661e-06	1.08287	PPP4C	protein_coding	1506.56	1664.56
ENSG00000102897.9	495.672	0.0864367	0.0154876	5.58101	2.39126e-08	1.74349e-06	1.06174	LYRM1	protein_coding	516.312	551.333
ENSG00000218996.1	1.96884	-0.332764	0.0596359	-5.57993	2.40615e-08	1.7475e-06	0.794014	ARL4AP5	processed_pseudogene	2.44027	1.96053
ENSG00000163751.3	149.029	0.424917	0.0761525	5.57982	2.4077e-08	1.7475e-06	1.3425	CPA3	protein_coding	137.277	177.361
ENSG00000207326.1	7.31538	-0.171074	0.0306679	-5.57828	2.42907e-08	1.75901e-06	0.888181	RF00019	misc_RNA	8.90929	7.88026
ENSG00000198431.15	3592.87	0.111654	0.0200262	5.57539	2.4697e-08	1.78439e-06	1.08047	TXNRD1	protein_coding	3675.46	4082.44
ENSG00000076513.16	7066.53	0.0962019	0.0172566	5.5748	2.4781e-08	1.78641e-06	1.06896	ANKRD13A	protein_coding	7263.23	7921.42
ENSG00000284882.1	210.239	0.147801	0.0265144	5.57436	2.48441e-08	1.78693e-06	1.10788	AL359762.1	bidirectional_promoter_lncRNA	204.549	235.392
ENSG00000100055.20	10721.8	0.107251	0.019253	5.57062	2.5383e-08	1.82159e-06	1.07717	CYTH4	protein_coding	10982.8	11990.4
ENSG00000136238.17	2455.1	0.0844268	0.0151735	5.56409	2.63531e-08	1.88381e-06	1.06027	RAC1	protein_coding	2487.27	2706.24
ENSG00000120696.8	1035.36	0.158609	0.0285064	5.56399	2.63681e-08	1.88381e-06	1.11621	KBTBD7	protein_coding	1035.83	1168.15
ENSG00000162704.15	13097.1	0.123368	0.0221795	5.56228	2.66276e-08	1.8924e-06	1.08928	ARPC5	protein_coding	13385.2	14927.3
ENSG00000164713.9	946.222	0.100851	0.0181328	5.56177	2.67046e-08	1.8924e-06	1.07241	BRI3	protein_coding	951.336	1056.73
ENSG00000186001.13	1778.68	-0.0593986	0.0106803	-5.56152	2.67429e-08	1.8924e-06	0.959664	LRCH3	protein_coding	1966.11	1918.11
ENSG00000274929.1	125.537	0.112357	0.0202032	5.56132	2.67737e-08	1.8924e-06	1.08099	AL157813.1	sense_intronic	128.392	143.171
ENSG00000260621.1	46.1898	0.158871	0.0285675	5.56125	2.67846e-08	1.8924e-06	1.11641	AC092140.1	antisense	46.3894	53.0789
ENSG00000257243.1	12.7874	-0.132179	0.0237806	-5.55826	2.72473e-08	1.91736e-06	0.912452	AC020612.1	processed_pseudogene	14.7058	13.4158
ENSG00000208022.1	30.632	0.193239	0.0347665	5.55819	2.72579e-08	1.91736e-06	1.14333	MIR618	miRNA	30.9381	36.15
ENSG00000168887.10	1512.69	0.0643532	0.011589	5.55295	2.80896e-08	1.97152e-06	1.04562	C2orf68	protein_coding	1574.49	1676.22
ENSG00000158773.14	3070.13	0.100563	0.0181148	5.55142	2.83364e-08	1.98448e-06	1.07219	USF1	protein_coding	3169.65	3467.36
ENSG00000151651.15	5010.98	0.147181	0.0265164	5.55057	2.84739e-08	1.98975e-06	1.1074	ADAM8	protein_coding	4955.45	5609.2
ENSG00000165609.12	1259.38	0.0815878	0.0147011	5.54976	2.86067e-08	1.99466e-06	1.05818	NUDT5	protein_coding	1320.12	1406.13
ENSG00000158201.9	2344.57	0.111363	0.020068	5.5493	2.86817e-08	1.99554e-06	1.08025	ABHD3	protein_coding	2416.35	2672.05
ENSG00000167703.14	2671.53	0.141888	0.0255779	5.54729	2.90132e-08	2.01421e-06	1.10335	SLC43A2	protein_coding	2613.57	2949.96
ENSG00000141526.16	8168.82	0.147423	0.0265858	5.54518	2.9365e-08	2.03421e-06	1.10759	SLC16A3	protein_coding	7975.2	9106.02
ENSG00000099860.8	574.254	0.135426	0.0244252	5.54451	2.94772e-08	2.03756e-06	1.09842	GADD45B	protein_coding	577.478	639.959
ENSG00000204177.10	454.62	-0.115522	0.0208374	-5.544	2.95639e-08	2.03915e-06	0.923048	BMS1P1	transcribed_unprocessed_pseudogene	517.049	486.711
ENSG00000159720.11	3667.32	0.117661	0.0212296	5.54231	2.98506e-08	2.05448e-06	1.08497	ATP6V0D1	protein_coding	3656.48	4081.36
ENSG00000163788.13	7125.35	0.0982548	0.0177358	5.53992	3.02602e-08	2.07819e-06	1.07048	SNRK	protein_coding	7362.47	8016.25
ENSG00000188158.15	344.755	0.150293	0.0271371	5.5383	3.05427e-08	2.08975e-06	1.10979	NHS	protein_coding	337.595	390.826
ENSG00000223878.1	101.851	0.126349	0.0228141	5.5382	3.05593e-08	2.08975e-06	1.09153	PPIAP53	processed_pseudogene	104.002	115.611
ENSG00000112096.17	57309.8	0.154986	0.0279905	5.5371	3.07513e-08	2.09838e-06	1.11341	SOD2	protein_coding	57883.2	65109.8
ENSG00000169220.17	1130.01	0.122102	0.0220539	5.53654	3.08498e-08	2.10062e-06	1.08832	RGS14	protein_coding	1134.74	1257.24
ENSG00000105053.10	1451.82	0.063245	0.0114243	5.53601	3.09448e-08	2.1026e-06	1.04481	VRK3	protein_coding	1497.04	1589.98
ENSG00000117676.13	4077.57	0.101974	0.0184216	5.53556	3.10228e-08	2.10342e-06	1.07324	RPS6KA1	protein_coding	4139.01	4554.71
ENSG00000115339.13	1035.73	0.118907	0.0214931	5.53235	3.15972e-08	2.13783e-06	1.08591	GALNT3	protein_coding	1066.68	1168.67
ENSG00000165030.3	672.973	0.149497	0.0270257	5.53167	3.17196e-08	2.14158e-06	1.10918	NFIL3	protein_coding	666.631	772.882
ENSG00000173200.12	1978.04	-0.120426	0.0217731	-5.53096	3.18476e-08	2.14568e-06	0.919916	PARP15	protein_coding	2256.65	2129.15
ENSG00000156875.13	1868.64	0.111189	0.0201168	5.52714	3.25489e-08	2.18831e-06	1.08012	MFSD14A	protein_coding	1941.21	2112.27
ENSG00000154889.16	2808.69	0.0972396	0.017597	5.52592	3.27771e-08	2.19903e-06	1.06972	MPPE1	protein_coding	2882.52	3170.49
ENSG00000227072.1	5.84003	-0.190685	0.0345317	-5.52202	3.35121e-08	2.24362e-06	0.87619	AL353706.1	processed_pseudogene	6.93805	6.28026
ENSG00000162747.10	31547.5	0.209233	0.037991	5.50743	3.64103e-08	2.43256e-06	1.15607	FCGR3B	protein_coding	31077.5	36423.3
ENSG00000271452.1	12.274	-0.132991	0.024163	-5.5039	3.7149e-08	2.47673e-06	0.911939	AC005034.5	sense_intronic	14.0487	12.9224
ENSG00000116514.16	1102.83	0.122875	0.0223298	5.50275	3.7391e-08	2.48767e-06	1.0889	RNF19B	protein_coding	1099.68	1228.06
ENSG00000213246.6	1641.35	0.114951	0.0208958	5.50117	3.77274e-08	2.50484e-06	1.08294	SUPT4H1	protein_coding	1661.81	1835.05
ENSG00000147416.10	12563.5	0.114467	0.0208269	5.49608	3.8832e-08	2.57282e-06	1.08257	ATP6V1B2	protein_coding	12854.8	14316.4
ENSG00000109854.13	980.79	0.116953	0.0212835	5.495	3.90705e-08	2.58326e-06	1.08444	HTATIP2	protein_coding	1008.19	1113.3
ENSG00000198700.9	1297.37	-0.0648042	0.011801	-5.49139	3.98785e-08	2.63124e-06	0.956075	IPO9	protein_coding	1457.81	1404.52
ENSG00000087074.7	771.597	0.146306	0.0266594	5.48798	4.06558e-08	2.677e-06	1.10673	PPP1R15A	protein_coding	761.358	860.675
ENSG00000101474.11	4060.32	0.141171	0.0257266	5.48737	4.07965e-08	2.68073e-06	1.1028	APMAP	protein_coding	4039.15	4615.21
ENSG00000177427.12	309.592	0.0755879	0.0137789	5.48575	4.11715e-08	2.69982e-06	1.05379	MIEF2	protein_coding	319.956	341.997
ENSG00000135334.8	851.155	0.0934163	0.0170434	5.48107	4.22763e-08	2.76658e-06	1.06689	AKIRIN2	protein_coding	866.923	952.091
ENSG00000164938.13	4725.71	0.114775	0.0209434	5.48023	4.24777e-08	2.77408e-06	1.08281	TP53INP1	protein_coding	4889.28	5440.7
ENSG00000145860.11	2729.49	0.0802814	0.0146557	5.47782	4.30599e-08	2.80636e-06	1.05722	RNF145	protein_coding	2869.47	3063.54
ENSG00000101916.11	5487.9	0.137842	0.0251795	5.47439	4.39022e-08	2.85543e-06	1.10026	TLR8	protein_coding	5523.4	6226.27
ENSG00000237169.1	5.52607	0.205798	0.0376266	5.46947	4.51376e-08	2.92982e-06	1.15332	RPL12P27	processed_pseudogene	5.22788	6.22105
ENSG00000011422.11	1424.07	0.141174	0.0258384	5.46371	4.66283e-08	3.02043e-06	1.1028	PLAUR	protein_coding	1401.84	1586.74
ENSG00000233235.1	12.2208	-0.131231	0.0240265	-5.46195	4.7094e-08	3.03952e-06	0.913052	BX119321.1	unprocessed_pseudogene	14.2633	13.0132
ENSG00000258082.1	209.404	0.155921	0.0285471	5.46187	4.71133e-08	3.03952e-06	1.11413	AL391832.3	lincRNA	205.73	241.068
ENSG00000109743.10	1443.09	0.125958	0.0230644	5.46113	4.73113e-08	3.04614e-06	1.09123	BST1	protein_coding	1454.25	1642
ENSG00000158792.15	101.921	0.141534	0.0259195	5.46054	4.74701e-08	3.05022e-06	1.10308	SPATA2L	protein_coding	99.8562	111.734
ENSG00000166167.17	361.931	-0.0734525	0.0134563	-5.4586	4.79916e-08	3.07754e-06	0.950361	BTRC	protein_coding	404.788	389.517
ENSG00000198799.11	1058.11	-0.064555	0.0118274	-5.4581	4.81266e-08	3.08001e-06	0.95624	LRIG2	protein_coding	1176.72	1140.1
ENSG00000136490.8	5613.96	0.102053	0.0187227	5.45074	5.01597e-08	3.2037e-06	1.0733	LIMD2	protein_coding	5681.65	6155.27
ENSG00000132823.10	1391.6	0.114626	0.0210336	5.44965	5.0468e-08	3.21696e-06	1.08269	OSER1	protein_coding	1422.5	1570.14
ENSG00000166523.7	2124.54	0.191654	0.0351805	5.44773	5.10165e-08	3.24544e-06	1.14207	CLEC4E	protein_coding	2065.85	2443.84
ENSG00000205423.11	958.606	0.105655	0.0193979	5.44673	5.13041e-08	3.25725e-06	1.07598	CNEP1R1	protein_coding	985.717	1088.49
ENSG00000105355.8	1121.78	0.129903	0.0238633	5.44362	5.22074e-08	3.30802e-06	1.09422	PLIN3	protein_coding	1121.49	1255.98
ENSG00000125375.14	888.477	-0.0662777	0.0121804	-5.44134	5.28819e-08	3.34413e-06	0.955099	ATP5S	protein_coding	977.265	945.761
ENSG00000171700.13	1550.55	0.108198	0.0198914	5.43943	5.34525e-08	3.37353e-06	1.07788	RGS19	protein_coding	1545.36	1709.33
ENSG00000065135.10	6879.47	0.0783842	0.0144117	5.43892	5.36058e-08	3.37653e-06	1.05583	GNAI3	protein_coding	7174.52	7724.96
ENSG00000260064.1	17.4173	-0.109657	0.0201723	-5.43603	5.44816e-08	3.42494e-06	0.926808	AC092332.1	sense_intronic	19.9248	18.9237
ENSG00000100030.14	10995.6	0.0830081	0.0152851	5.43065	5.61491e-08	3.52225e-06	1.05922	MAPK1	protein_coding	11300.8	12303.2
ENSG00000165029.15	3715.26	0.203073	0.0373974	5.43013	5.63123e-08	3.52225e-06	1.15115	ABCA1	protein_coding	3581.19	4352.76
ENSG00000113318.9	582.71	-0.084592	0.0155787	-5.42998	5.63605e-08	3.52225e-06	0.943051	MSH3	protein_coding	661.239	635.155
ENSG00000165175.15	2388.22	0.132281	0.0243708	5.42787	5.70298e-08	3.55712e-06	1.09603	MID1IP1	protein_coding	2392.56	2677.28
ENSG00000059728.10	21805.7	0.141909	0.0261501	5.42672	5.73979e-08	3.56878e-06	1.10336	MXD1	protein_coding	21699.1	24634.6
ENSG00000102882.11	568.427	0.133405	0.0245836	5.42659	5.74402e-08	3.56878e-06	1.09688	MAPK3	protein_coding	556.498	622.775
ENSG00000181016.9	236.132	0.155623	0.0286802	5.42614	5.75868e-08	3.57094e-06	1.1139	LSMEM1	protein_coding	235.343	272.974
ENSG00000151702.16	6039.74	0.0635971	0.0117282	5.42259	5.87413e-08	3.62794e-06	1.04507	FLI1	protein_coding	6215.5	6612.14
ENSG00000278600.1	1824.43	0.118787	0.021908	5.42209	5.89046e-08	3.62794e-06	1.08582	AC015871.3	sense_intronic	1847.61	2080.75
ENSG00000150991.14	27451.2	0.110781	0.0204318	5.42199	5.89384e-08	3.62794e-06	1.07981	UBC	protein_coding	27833.5	30840
ENSG00000224152.1	180.518	0.17993	0.0331906	5.42111	5.92302e-08	3.62794e-06	1.13283	AC009506.1	antisense	169.659	199.607
ENSG00000148841.16	2728.98	0.126106	0.0232628	5.42094	5.92858e-08	3.62794e-06	1.09134	ITPRIP	protein_coding	2732.29	3062.57
ENSG00000265996.1	86.3421	0.129353	0.0238624	5.42079	5.9336e-08	3.62794e-06	1.0938	MIR3671	miRNA	88.0111	97.5737
ENSG00000113369.8	8911.58	0.170273	0.0314121	5.42062	5.93943e-08	3.62794e-06	1.12527	ARRDC3	protein_coding	8945.28	10180.3
ENSG00000252451.1	4.94431	-0.205645	0.0379379	-5.42055	5.94149e-08	3.62794e-06	0.867151	RNA5SP168	rRNA_pseudogene	5.78319	5.16974
ENSG00000276867.1	11.7697	-0.133154	0.0245768	-5.41785	6.03192e-08	3.67614e-06	0.911836	AC074050.4	lincRNA	13.6726	12.4408
ENSG00000197381.15	661.197	-0.116385	0.0214848	-5.41712	6.05682e-08	3.68427e-06	0.922496	ADARB1	protein_coding	767.319	703.108
ENSG00000101109.11	16295.6	0.073086	0.0134946	5.41596	6.09607e-08	3.7011e-06	1.05196	STK4	protein_coding	17184.1	18290.9
ENSG00000217275.2	25.2045	0.248311	0.0459082	5.40885	6.34294e-08	3.84368e-06	1.18782	AL031777.1	processed_pseudogene	24.4358	29.2513
ENSG00000012232.8	2052.37	0.117923	0.0218047	5.40813	6.36852e-08	3.85156e-06	1.08517	EXTL3	protein_coding	2037.2	2294.81
ENSG00000271789.1	72.2917	-0.11143	0.0206054	-5.40781	6.38006e-08	3.85156e-06	0.92567	AL080317.2	lincRNA	82.0619	77.1539
ENSG00000244618.3	13.9766	-0.25492	0.0471511	-5.40645	6.42872e-08	3.87361e-06	0.838034	RN7SL334P	misc_RNA	16.7235	14.5434
ENSG00000118508.4	813.008	0.134228	0.0248358	5.40463	6.49436e-08	3.89895e-06	1.09751	RAB32	protein_coding	819.051	921.172
ENSG00000178726.6	887.524	0.207732	0.0384361	5.4046	6.49519e-08	3.89895e-06	1.15487	THBD	protein_coding	852.153	1015.63
ENSG00000148719.14	1176.55	0.0819278	0.015163	5.40312	6.54908e-08	3.92392e-06	1.05843	DNAJB12	protein_coding	1197.69	1300.01
ENSG00000130338.12	855.176	-0.0748562	0.0138556	-5.40259	6.5687e-08	3.92831e-06	0.949437	TULP4	protein_coding	973.487	925.479
ENSG00000252759.1	52.4271	0.0641858	0.0118824	5.40178	6.59828e-08	3.93862e-06	1.04549	RF00019	misc_RNA	54.8606	58.4145
ENSG00000232882.1	16.2728	-0.11319	0.020969	-5.39797	6.73994e-08	4.01567e-06	0.924542	PHKA1P1	processed_pseudogene	18.4912	17.4776
ENSG00000139278.9	7893.86	0.13195	0.0244498	5.3968	6.78412e-08	4.03447e-06	1.09577	GLIPR1	protein_coding	8042.77	9048.63
ENSG00000143418.19	1911.92	0.0786646	0.0145776	5.39626	6.80436e-08	4.03898e-06	1.05604	CERS2	protein_coding	1975.42	2106.6
ENSG00000124571.17	468.441	-0.0720726	0.0133585	-5.39528	6.84175e-08	4.05364e-06	0.95127	XPO5	protein_coding	520.668	503.117
ENSG00000160593.18	21154.3	0.11411	0.0211603	5.39264	6.94317e-08	4.10611e-06	1.08231	JAML	protein_coding	21829.9	24060.7
ENSG00000243806.1	58.4388	0.197147	0.0365621	5.39211	6.96339e-08	4.11046e-06	1.14643	RPL7P18	processed_pseudogene	57.2566	67.2868
ENSG00000097033.14	3984.14	0.10384	0.0192609	5.39121	6.99861e-08	4.12363e-06	1.07463	SH3GLB1	protein_coding	4120.17	4494.2
ENSG00000133318.13	2725.55	0.113514	0.0210616	5.38962	7.06081e-08	4.15262e-06	1.08186	RTN3	protein_coding	2759.7	3092.99
ENSG00000178199.13	739.98	-0.104362	0.0193664	-5.38881	7.09262e-08	4.16366e-06	0.930216	ZC3H12D	protein_coding	842.381	774.089
ENSG00000164823.10	1482.71	0.153742	0.0285335	5.38812	7.11998e-08	4.16577e-06	1.11245	OSGIN2	protein_coding	1490.22	1677.12
ENSG00000180245.4	17.1269	-0.109336	0.0202922	-5.38806	7.12232e-08	4.16577e-06	0.927015	RRH	protein_coding	19.7765	18.4579
ENSG00000260816.2	126.371	-0.17236	0.0319948	-5.38713	7.15906e-08	4.17961e-06	0.88739	AC027279.1	sense_intronic	147.122	134.42
ENSG00000144559.10	311.936	-0.112577	0.0209159	-5.38236	7.35151e-08	4.28413e-06	0.924935	TAMM41	protein_coding	353.553	330.751
ENSG00000100504.16	7000.28	0.154684	0.0287473	5.38082	7.41456e-08	4.31131e-06	1.11318	PYGL	protein_coding	6872.52	7891.78
ENSG00000180871.7	6972.64	0.173184	0.032187	5.38057	7.42515e-08	4.31131e-06	1.12754	CXCR2	protein_coding	6802.47	7817.52
ENSG00000262332.1	25.1941	0.239038	0.0444323	5.37984	7.45541e-08	4.32103e-06	1.18021	AC136624.1	antisense	23.4912	29.6066
ENSG00000171606.17	1351.29	0.0615383	0.011442	5.37828	7.52016e-08	4.35066e-06	1.04358	ZNF274	protein_coding	1424.12	1501.78
ENSG00000167261.13	1784.47	0.139449	0.0259362	5.37661	7.59021e-08	4.38325e-06	1.10148	DPEP2	protein_coding	1768.91	1990.28
ENSG00000126822.16	5248.32	0.128534	0.0239146	5.37473	7.66991e-08	4.42128e-06	1.09318	PLEKHG3	protein_coding	5201.04	5892.75
ENSG00000083828.15	1413.75	0.0776854	0.0144589	5.37285	7.75018e-08	4.45949e-06	1.05532	ZNF586	protein_coding	1451.39	1560.56
ENSG00000165312.6	618.329	0.113933	0.0212112	5.37134	7.81523e-08	4.48884e-06	1.08217	OTUD1	protein_coding	633.352	693.113
ENSG00000253210.1	164.967	0.150925	0.0281055	5.36994	7.87614e-08	4.5157e-06	1.11028	AC040970.1	antisense	161.854	186.625
ENSG00000225611.1	113.851	0.160478	0.02989	5.36896	7.91915e-08	4.53222e-06	1.11766	LINC02158	antisense	111.688	128.918
ENSG00000119900.8	13954.5	0.141997	0.0264517	5.36815	7.95474e-08	4.54445e-06	1.10343	OGFRL1	protein_coding	14161.4	16036.1
ENSG00000184602.5	2793.3	0.13056	0.0243253	5.36726	7.99415e-08	4.55881e-06	1.09472	SNN	protein_coding	2802.23	3130.54
ENSG00000143753.12	1332.56	0.0879633	0.0163934	5.36577	8.06043e-08	4.58441e-06	1.06287	DEGS1	protein_coding	1392.38	1498.13
ENSG00000125347.13	14977.3	0.115414	0.02151	5.36561	8.06776e-08	4.58441e-06	1.08329	IRF1	protein_coding	15250.1	16787.3
ENSG00000144635.8	1843.26	0.113629	0.0211877	5.36298	8.18583e-08	4.64324e-06	1.08195	DYNC1LI1	protein_coding	1893.29	2088.52
ENSG00000259332.3	186.481	0.134303	0.0250463	5.36221	8.22116e-08	4.65501e-06	1.09756	ST20-MTHFS	protein_coding	183.502	207.205
ENSG00000204054.13	1443.35	0.104084	0.0194148	5.36108	8.27244e-08	4.67576e-06	1.07481	LINC00963	processed_transcript	1447.26	1592.49
ENSG00000237803.5	414.356	0.210911	0.0393719	5.35689	8.46664e-08	4.77065e-06	1.15742	LINC00211	lincRNA	396.29	478.938
ENSG00000162444.11	170.568	0.183466	0.0342491	5.35681	8.4702e-08	4.77065e-06	1.13561	RBP7	protein_coding	165.212	193.55
ENSG00000167565.12	177.858	0.102319	0.0191113	5.35382	8.61146e-08	4.84167e-06	1.0735	SERTAD3	protein_coding	181.073	200.23
ENSG00000143337.18	3149.14	0.0798785	0.0149244	5.35222	8.68811e-08	4.87618e-06	1.05693	TOR1AIP1	protein_coding	3282.69	3513.59
ENSG00000233358.2	12.1405	-0.292497	0.0546715	-5.35008	8.79132e-08	4.92545e-06	0.816488	AL035401.1	lincRNA	14.3341	12.3526
ENSG00000093000.18	4420.31	0.0846137	0.0158312	5.34475	9.05411e-08	5.0638e-06	1.0604	NUP50	protein_coding	4614.35	4981.66
ENSG00000144118.13	3220.36	0.131839	0.0246764	5.34273	9.15584e-08	5.11174e-06	1.09569	RALB	protein_coding	3272.06	3660.21
ENSG00000225342.2	767.84	0.165109	0.0309093	5.34174	9.20591e-08	5.13073e-06	1.12125	AC079630.1	antisense	759.283	873.955
ENSG00000104915.14	1690.84	0.116148	0.0217459	5.34117	9.23505e-08	5.138e-06	1.08384	STX10	protein_coding	1690.13	1894.06
ENSG00000175756.13	1042.87	0.113425	0.0212429	5.33942	9.32464e-08	5.17827e-06	1.08179	AURKAIP1	protein_coding	1051.78	1152.29
ENSG00000135932.10	6207.91	0.101448	0.019001	5.33912	9.33986e-08	5.17827e-06	1.07285	CAB39	protein_coding	6395.14	6962.81
ENSG00000156642.16	1380.72	0.089879	0.0168387	5.33763	9.41693e-08	5.21195e-06	1.06428	NPTN	protein_coding	1435.84	1566.67
ENSG00000244617.2	242.729	0.195311	0.0365945	5.33716	9.44119e-08	5.21634e-06	1.14497	ASPRV1	protein_coding	238.015	277.458
ENSG00000049245.12	1663.1	0.0918261	0.017214	5.33438	9.58729e-08	5.28791e-06	1.06572	VAMP3	protein_coding	1714.36	1865.16
ENSG00000102921.7	2858.29	0.091307	0.017127	5.33117	9.7583e-08	5.37295e-06	1.06533	N4BP1	protein_coding	2954.93	3204.18
ENSG00000274536.6	6970.97	0.137034	0.0257158	5.3288	9.88653e-08	5.43419e-06	1.09964	AL034397.3	antisense	7060.66	7840.88
ENSG00000228079.2	75.0134	0.182546	0.0342617	5.328	9.93008e-08	5.44875e-06	1.13489	AC012368.2	lincRNA	74.4867	85.3579
ENSG00000064012.21	6694.88	0.084155	0.0158	5.32625	1.00261e-07	5.49201e-06	1.06007	CASP8	protein_coding	6983.37	7554.27
ENSG00000271646.1	515.553	0.108454	0.020388	5.31948	1.04066e-07	5.69067e-06	1.07807	AC099343.3	bidirectional_promoter_lncRNA	529.577	576.193
ENSG00000222145.1	3.64595	-0.233229	0.0438587	-5.31774	1.05065e-07	5.73546e-06	0.850729	RF00045	snoRNA	4.39823	3.84605
ENSG00000183155.4	456.261	0.0499684	0.00940463	5.31317	1.07735e-07	5.87119e-06	1.03524	RABIF	protein_coding	476.65	503.289
ENSG00000233461.5	52.9054	0.166189	0.0312921	5.31089	1.0909e-07	5.93493e-06	1.12209	AL445524.1	antisense	51.3208	59.0329
ENSG00000128536.15	265.161	-0.131234	0.0247158	-5.30974	1.09783e-07	5.96243e-06	0.91305	CDHR3	protein_coding	305.177	282.758
ENSG00000134982.16	3626.13	0.101639	0.0191531	5.30668	1.11637e-07	6.0438e-06	1.07299	APC	protein_coding	3720.18	4054.81
ENSG00000136689.18	572.231	0.160191	0.0301869	5.30665	1.11659e-07	6.0438e-06	1.11744	IL1RN	protein_coding	562.206	638.382
ENSG00000147533.16	1272.46	0.0983767	0.0185491	5.30358	1.13552e-07	6.13582e-06	1.07057	GOLGA7	protein_coding	1324.77	1424.67
ENSG00000241878.11	1645.66	0.139161	0.0262495	5.30145	1.14886e-07	6.19744e-06	1.10126	PISD	protein_coding	1630.73	1858.17
ENSG00000092531.9	4471.34	0.103345	0.0194964	5.30071	1.15351e-07	6.21203e-06	1.07426	SNAP23	protein_coding	4643.27	5071.46
ENSG00000196083.9	3947.93	0.146019	0.0275516	5.29984	1.15901e-07	6.23115e-06	1.10651	IL1RAP	protein_coding	4011.65	4456.07
ENSG00000137815.14	954.306	0.0641318	0.0121039	5.29844	1.16797e-07	6.26876e-06	1.04546	RTF1	protein_coding	992.442	1051.64
ENSG00000154359.12	732.458	0.0940077	0.0177488	5.29656	1.18003e-07	6.32286e-06	1.06733	LONRF1	protein_coding	756.412	821.238
ENSG00000279250.1	7.4221	-0.164375	0.0310394	-5.29568	1.18576e-07	6.34292e-06	0.892315	AC022919.1	TEC	8.5177	7.85395
ENSG00000172794.19	1544.45	0.093692	0.0176985	5.29378	1.19816e-07	6.39852e-06	1.0671	RAB37	protein_coding	1586.94	1739.79
ENSG00000165646.13	78.6696	0.189685	0.0358419	5.29228	1.20801e-07	6.44039e-06	1.14051	SLC18A2	protein_coding	77.6261	88.7579
ENSG00000261512.2	61.8073	0.156772	0.0296376	5.28963	1.22563e-07	6.52213e-06	1.11479	AC092368.3	lincRNA	60.5553	68.0263
ENSG00000188554.13	4484.71	0.0832355	0.0157364	5.28936	1.22743e-07	6.52213e-06	1.05939	NBR1	protein_coding	4654.83	5028.52
ENSG00000048991.16	643.115	-0.0645191	0.0122057	-5.28596	1.25047e-07	6.63353e-06	0.956264	R3HDM1	protein_coding	716.162	691.28
ENSG00000171236.9	1472.55	0.174324	0.0329859	5.28482	1.25829e-07	6.65612e-06	1.12844	LRG1	protein_coding	1432.83	1650.24
ENSG00000072952.18	1465.68	0.159905	0.0302579	5.28473	1.2589e-07	6.65612e-06	1.11721	MRVI1	protein_coding	1452.94	1660.54
ENSG00000108244.16	2171.64	0.21313	0.040353	5.28163	1.2804e-07	6.75863e-06	1.1592	KRT23	protein_coding	2092.04	2482.53
ENSG00000171223.5	4664.87	0.143822	0.0272332	5.28113	1.28388e-07	6.76578e-06	1.10483	JUNB	protein_coding	4521.73	5109.59
ENSG00000114480.12	892.748	0.101154	0.0191645	5.27818	1.30473e-07	6.86436e-06	1.07263	GBE1	protein_coding	916.763	1011.32
ENSG00000180901.10	521.969	0.0711599	0.0134853	5.27684	1.31429e-07	6.90329e-06	1.05056	KCTD2	protein_coding	545.17	580.358
ENSG00000172354.9	2891.27	0.123861	0.0234781	5.27561	1.32313e-07	6.93829e-06	1.08965	GNB2	protein_coding	2862.16	3182.07
ENSG00000102580.14	3338.84	0.117301	0.0222394	5.27446	1.33146e-07	6.97053e-06	1.0847	DNAJC3	protein_coding	3438.04	3791.98
ENSG00000231047.1	117.456	0.154331	0.0292622	5.27408	1.33424e-07	6.97365e-06	1.11291	GCNT1P3	processed_pseudogene	119.062	132.801
ENSG00000266094.7	4737.74	0.077801	0.0147681	5.26817	1.37793e-07	7.1902e-06	1.05541	RASSF5	protein_coding	4932.65	5293.39
ENSG00000182487.12	2637.48	0.146562	0.0278326	5.26582	1.39563e-07	7.2707e-06	1.10693	NCF1B	transcribed_unprocessed_pseudogene	2572.36	2935.15
ENSG00000243664.1	29.7437	0.226126	0.0429613	5.26347	1.41358e-07	7.35225e-06	1.16969	RPS29P12	processed_pseudogene	29	35.3289
ENSG00000167552.13	3580.77	0.138431	0.0263029	5.26298	1.4174e-07	7.36012e-06	1.10071	TUBA1A	protein_coding	3636.57	4064.64
ENSG00000153487.12	858.322	0.0635206	0.0120707	5.26238	1.42199e-07	7.37195e-06	1.04501	ING1	protein_coding	893.748	947.707
ENSG00000219150.2	12.157	0.131301	0.0249693	5.25848	1.45247e-07	7.51778e-06	1.09528	AL603914.1	processed_pseudogene	12.1283	13.7289
ENSG00000102144.14	7900.79	0.0905059	0.0172188	5.25622	1.47045e-07	7.59854e-06	1.06474	PGK1	protein_coding	8216.88	8905.31
ENSG00000137509.10	2418.59	0.0878852	0.0167372	5.2509	1.51361e-07	7.80892e-06	1.06281	PRCP	protein_coding	2509.96	2719.01
ENSG00000266720.2	12.5371	-0.12648	0.0240913	-5.25003	1.52076e-07	7.83315e-06	0.916064	RN7SL14P	misc_RNA	14.3363	12.8289
ENSG00000143409.15	1342.62	0.126582	0.024113	5.24952	1.52493e-07	7.83617e-06	1.0917	MINDY1	protein_coding	1341.8	1500.29
ENSG00000138069.17	2141.15	0.0922748	0.0175783	5.24936	1.52626e-07	7.83617e-06	1.06605	RAB1A	protein_coding	2247.41	2432.77
ENSG00000188921.13	3740.95	0.0860325	0.0163909	5.24879	1.53101e-07	7.84797e-06	1.06145	HACD4	protein_coding	3924.26	4225.99
ENSG00000103510.19	1300.4	0.0776329	0.014793	5.24793	1.53814e-07	7.87186e-06	1.05529	KAT8	protein_coding	1351.41	1453.8
ENSG00000252274.1	7.64169	-0.158532	0.0302207	-5.2458	1.55603e-07	7.9507e-06	0.895936	RF00422	scaRNA	9.00885	8.31447
ENSG00000156671.13	2268.43	0.0914755	0.0174415	5.24471	1.56527e-07	7.98514e-06	1.06546	SAMD8	protein_coding	2358.56	2549.3
ENSG00000101457.12	552.913	0.120686	0.0230161	5.24355	1.57516e-07	8.02274e-06	1.08725	DNTTIP1	protein_coding	559.553	625.525
ENSG00000142208.16	2866.75	0.0932832	0.0177939	5.24243	1.58473e-07	8.05863e-06	1.0668	AKT1	protein_coding	2922.14	3188.82
ENSG00000171793.14	660.251	-0.0670415	0.0127895	-5.24191	1.58924e-07	8.06875e-06	0.954594	CTPS1	protein_coding	744.035	716.649
ENSG00000159496.14	535.44	0.157293	0.0300116	5.24109	1.59632e-07	8.09184e-06	1.11519	RGL4	protein_coding	527.869	607.112
ENSG00000027697.14	5393.02	0.155104	0.0296023	5.23959	1.60933e-07	8.14487e-06	1.1135	IFNGR1	protein_coding	5437.07	6161.09
ENSG00000241553.12	8442.98	0.101044	0.0192885	5.23855	1.61842e-07	8.17787e-06	1.07255	ARPC4	protein_coding	8622.68	9459.44
ENSG00000214212.8	914.94	0.123034	0.0234918	5.23734	1.62904e-07	8.21856e-06	1.08902	C19orf38	protein_coding	909.458	1021.93
ENSG00000237135.1	179.025	0.175373	0.0334936	5.23601	1.64081e-07	8.26487e-06	1.12926	DDX10P1	processed_pseudogene	181.876	204.766
ENSG00000163466.15	8495.93	0.0889536	0.0169899	5.23568	1.64379e-07	8.26683e-06	1.0636	ARPC2	protein_coding	8731.42	9505.29
ENSG00000160991.15	3306.58	0.115886	0.0221553	5.2306	1.68958e-07	8.48048e-06	1.08364	ORAI2	protein_coding	3275.59	3627.77
ENSG00000100284.20	845.75	0.117368	0.0224397	5.23038	1.69158e-07	8.48048e-06	1.08475	TOM1	protein_coding	832.106	927.345
ENSG00000111276.10	5681.93	0.104264	0.0199416	5.2285	1.70891e-07	8.55391e-06	1.07495	CDKN1B	protein_coding	5854.33	6341
ENSG00000100462.15	406.866	0.101745	0.0194729	5.22495	1.74203e-07	8.70608e-06	1.07307	PRMT5	protein_coding	424.628	457.951
ENSG00000123700.4	4329.71	0.162566	0.0311199	5.22384	1.75247e-07	8.74457e-06	1.11928	KCNJ2	protein_coding	4413.86	4940.91
ENSG00000169957.9	191.923	0.100233	0.019196	5.22158	1.77402e-07	8.83828e-06	1.07195	ZNF768	protein_coding	194.122	211.934
ENSG00000108468.14	1177.35	0.106027	0.020316	5.2189	1.79993e-07	8.9534e-06	1.07626	CBX1	protein_coding	1214.82	1326.62
ENSG00000126062.3	263.109	0.0924652	0.01772	5.21812	1.80745e-07	8.97684e-06	1.06619	TMEM115	protein_coding	265.223	287.667
ENSG00000176390.11	3902.17	0.093437	0.0179077	5.2177	1.81156e-07	8.98328e-06	1.06691	CRLF3	protein_coding	4042.57	4369.42
ENSG00000235128.1	57.5288	-0.160814	0.0308281	-5.21646	1.82376e-07	9.02974e-06	0.89452	AC013474.1	processed_pseudogene	67.3407	60.5289
ENSG00000060491.16	3952.82	0.111181	0.0213151	5.21605	1.8278e-07	9.03574e-06	1.08011	OGFR	protein_coding	3975.53	4364.2
ENSG00000110446.10	1196.5	0.123521	0.0236891	5.21425	1.84567e-07	9.10998e-06	1.08939	SLC15A3	protein_coding	1191.27	1328.83
ENSG00000083223.17	10052.5	0.106366	0.0204004	5.21394	1.84874e-07	9.11104e-06	1.07651	TUT7	protein_coding	10354.4	11305.8
ENSG00000112195.8	1473.99	0.137842	0.0264398	5.21344	1.85367e-07	9.12125e-06	1.10026	TREML2	protein_coding	1459.61	1649.26
ENSG00000197054.11	234.207	0.11845	0.0227253	5.21226	1.86555e-07	9.16561e-06	1.08557	ZNF763	protein_coding	238.739	261.382
ENSG00000103313.12	5380.66	0.140566	0.0269751	5.21096	1.87863e-07	9.21569e-06	1.10234	MEFV	protein_coding	5296.14	6001.85
ENSG00000231729.1	8.60277	-0.149373	0.0286678	-5.21049	1.88345e-07	9.22515e-06	0.901642	ARHGEF9-IT1	sense_intronic	9.97788	9.18026
ENSG00000266405.3	207.889	0.149584	0.0287199	5.20838	1.90496e-07	9.30859e-06	1.10925	CBX3P2	transcribed_processed_pseudogene	205.425	233.297
ENSG00000138764.14	1746.06	0.0988941	0.018988	5.20825	1.90632e-07	9.30859e-06	1.07095	CCNG2	protein_coding	1818.07	1990.98
ENSG00000170852.10	3067.42	0.0864502	0.0166009	5.20757	1.91329e-07	9.32838e-06	1.06175	KBTBD2	protein_coding	3219.98	3451.52
ENSG00000163393.12	1782.82	0.127147	0.0244179	5.2071	1.91816e-07	9.33787e-06	1.09213	SLC22A15	protein_coding	1786.35	2049.31
ENSG00000082196.20	111.011	-0.109963	0.0211199	-5.2066	1.92329e-07	9.3486e-06	0.926612	C1QTNF3	protein_coding	128.316	120.561
ENSG00000229794.2	6.08176	-0.17751	0.0341052	-5.20479	1.94221e-07	9.41515e-06	0.884228	MTCYBP32	processed_pseudogene	7.05973	6.42105
ENSG00000143502.14	88.2126	-0.210834	0.0405083	-5.20472	1.94288e-07	9.41515e-06	0.864037	SUSD4	protein_coding	104.221	91.0276
ENSG00000186517.13	12829.8	0.098324	0.018903	5.20149	1.97692e-07	9.56561e-06	1.07053	ARHGAP30	protein_coding	13201.9	14440.6
ENSG00000131873.6	2070.96	0.119987	0.0230843	5.19777	2.01693e-07	9.74444e-06	1.08672	CHSY1	protein_coding	2108.92	2338.59
ENSG00000140563.14	8219.26	0.121594	0.0234032	5.19562	2.04035e-07	9.84267e-06	1.08794	MCTP2	protein_coding	8395.88	9429.08
ENSG00000214293.8	147.144	0.088696	0.0170731	5.19508	2.04626e-07	9.85633e-06	1.06341	APTR	lincRNA	149.535	164.405
ENSG00000107611.15	679.784	-0.127685	0.02458	-5.19467	2.05085e-07	9.86354e-06	0.915299	CUBN	protein_coding	796.582	726.961
ENSG00000265083.1	3.76837	-0.22384	0.0431106	-5.19224	2.07781e-07	9.97818e-06	0.856283	MIR3691	miRNA	4.57965	3.94342
ENSG00000117335.19	11749.5	0.109242	0.0210493	5.1898	2.10521e-07	1.00946e-05	1.07866	CD46	protein_coding	12271.1	13375.5
ENSG00000066336.11	874.388	0.157344	0.0303234	5.18887	2.1157e-07	1.01297e-05	1.11523	SPI1	protein_coding	815.476	930.751
ENSG00000137177.19	3011.12	0.117014	0.0225544	5.18806	2.12493e-07	1.01582e-05	1.08449	KIF13A	protein_coding	3042.91	3395.89
ENSG00000173153.13	1137.37	0.0920688	0.0177472	5.18779	2.12803e-07	1.01582e-05	1.0659	ESRRA	protein_coding	1153.13	1259.71
ENSG00000185753.12	1733.94	0.0577799	0.0111393	5.18705	2.13649e-07	1.01834e-05	1.04086	CXorf38	protein_coding	1861.9	1910.73
ENSG00000158793.13	450.598	0.0550946	0.0106275	5.18415	2.17001e-07	1.03278e-05	1.03893	NIT1	protein_coding	470.288	498.75
ENSG00000107738.19	9362.01	0.125673	0.0242523	5.18192	2.19612e-07	1.04365e-05	1.09102	VSIR	protein_coding	9304.09	10386
ENSG00000131236.16	5717.81	0.0860591	0.016629	5.17524	2.27624e-07	1.08011e-05	1.06147	CAP1	protein_coding	5916.12	6462.11
ENSG00000108582.11	6966.57	0.126895	0.0245214	5.17488	2.28061e-07	1.08058e-05	1.09194	CPD	protein_coding	7101.21	7876.65
ENSG00000274357.1	28.111	0.155673	0.0300924	5.17316	2.30163e-07	1.08893e-05	1.11394	RF00017	misc_RNA	27.5465	31.3171
ENSG00000201512.1	58.7223	0.207418	0.0400989	5.17265	2.30791e-07	1.0899e-05	1.15462	SNORA71C	snoRNA	55.6615	65.7408
ENSG00000182919.14	829.595	0.0873267	0.0168831	5.17244	2.31051e-07	1.0899e-05	1.0624	C11orf54	protein_coding	865.841	933.13
ENSG00000274922.1	238.873	0.105728	0.0204503	5.16998	2.3412e-07	1.10275e-05	1.07604	AL139384.1	lincRNA	243.111	266.866
ENSG00000173334.3	738.729	0.127838	0.0247287	5.16964	2.34549e-07	1.10314e-05	1.09266	TRIB1	protein_coding	729.542	814.816
ENSG00000130772.13	446.632	0.077681	0.0150331	5.16732	2.37478e-07	1.11527e-05	1.05532	MED18	protein_coding	469.243	502.22
ENSG00000121858.10	4802.42	0.145967	0.0282518	5.16665	2.38329e-07	1.11762e-05	1.10647	TNFSF10	protein_coding	4875.93	5456.18
ENSG00000115590.13	2007.82	0.179121	0.0346829	5.16454	2.41034e-07	1.12865e-05	1.13219	IL1R2	protein_coding	1928.64	2297.01
ENSG00000165264.10	462.232	0.121565	0.0235426	5.1636	2.42244e-07	1.13266e-05	1.08791	NDUFB6	protein_coding	477.867	525.884
ENSG00000280088.1	183.8	0.0939269	0.0181962	5.16189	2.4447e-07	1.1414e-05	1.06727	AC126474.2	TEC	185.936	201.447
ENSG00000166900.16	3857.49	0.126397	0.0244951	5.16011	2.4681e-07	1.15064e-05	1.09156	STX3	protein_coding	3901.38	4386.74
ENSG00000117614.9	1394.47	0.1302	0.0252422	5.15804	2.49545e-07	1.16169e-05	1.09445	SYF2	protein_coding	1423.13	1576.84
ENSG00000215717.5	1633.55	0.102358	0.0198454	5.15775	2.49941e-07	1.16184e-05	1.07353	TMEM167B	protein_coding	1693.8	1851.24
ENSG00000256533.1	28.3826	-0.0817237	0.0158467	-5.15715	2.50734e-07	1.16383e-05	0.944928	AP002373.2	processed_pseudogene	32.6681	30.2184
ENSG00000236095.1	11.4893	-0.230048	0.0446185	-5.15589	2.52428e-07	1.17e-05	0.852607	AL807757.2	sense_intronic	13.6062	12.1763
ENSG00000112561.17	953.481	0.0981594	0.0190469	5.15355	2.55599e-07	1.18298e-05	1.07041	TFEB	protein_coding	958.865	1056.09
ENSG00000173614.13	416.97	0.072782	0.0141242	5.15299	2.56361e-07	1.18479e-05	1.05174	NMNAT1	protein_coding	430.447	463.721
ENSG00000263326.1	4.27136	-0.215869	0.0419046	-5.15144	2.58497e-07	1.19194e-05	0.861027	AC133552.4	unprocessed_pseudogene	4.85619	4.10789
ENSG00000130755.12	3765.33	0.161157	0.0312845	5.15132	2.58655e-07	1.19194e-05	1.11818	GMFG	protein_coding	3790.81	4277.33
ENSG00000151726.13	22887.2	0.179835	0.0349351	5.14767	2.63738e-07	1.21305e-05	1.13275	ACSL1	protein_coding	22617.4	26339.1
ENSG00000178996.13	5557.54	0.104392	0.0202802	5.14749	2.63995e-07	1.21305e-05	1.07504	SNX18	protein_coding	5633.18	6219.23
ENSG00000204619.7	252.175	0.0825319	0.0160364	5.14654	2.65333e-07	1.21744e-05	1.05887	PPP1R11	protein_coding	258.139	279.386
ENSG00000102554.13	77.8206	0.157402	0.0305981	5.14417	2.6871e-07	1.23117e-05	1.11528	KLF5	protein_coding	76.1549	86.5039
ENSG00000105520.10	297.771	0.166146	0.0323206	5.14056	2.73927e-07	1.25328e-05	1.12206	PLPPR2	protein_coding	285.686	329.586
ENSG00000125246.15	152.868	-0.0993735	0.0193344	-5.13973	2.7513e-07	1.25698e-05	0.933438	CLYBL	protein_coding	175.774	163.693
ENSG00000054267.21	4864.77	0.0973076	0.0189368	5.13853	2.76891e-07	1.26322e-05	1.06978	ARID4B	protein_coding	5070.21	5454.82
ENSG00000231521.1	4.69085	-0.208272	0.0405556	-5.13546	2.81453e-07	1.28128e-05	0.865574	AL162385.2	antisense	5.04867	4.46842
ENSG00000142207.6	732.769	-0.0770998	0.0150136	-5.13533	2.81654e-07	1.28128e-05	0.947961	URB1	protein_coding	827.885	783.187
ENSG00000126759.13	4910.13	0.127683	0.0248756	5.13285	2.85383e-07	1.2964e-05	1.09254	CFP	protein_coding	4836.64	5458.27
ENSG00000147439.12	1057.65	0.0750265	0.0146191	5.13208	2.86553e-07	1.29987e-05	1.05338	BIN3	protein_coding	1090.24	1175.77
ENSG00000012048.21	455.615	0.104629	0.0203933	5.13055	2.889e-07	1.30845e-05	1.07522	BRCA1	protein_coding	462.23	512.739
ENSG00000105722.9	265.351	0.12034	0.0234566	5.13031	2.89264e-07	1.30845e-05	1.08699	ERF	protein_coding	262.058	291.641
ENSG00000269220.1	273.127	0.105259	0.0205207	5.12942	2.90634e-07	1.31279e-05	1.07569	LINC00528	lincRNA	275.635	303.922
ENSG00000234584.1	20.8344	-0.09394	0.0183181	-5.12827	2.92418e-07	1.31898e-05	0.93696	AC019186.1	lincRNA	24.5619	22.6105
ENSG00000266127.1	137.048	0.168182	0.0328043	5.12683	2.94664e-07	1.32724e-05	1.12364	ZNF415P1	processed_pseudogene	134.06	156.979
ENSG00000204599.14	741.391	0.0646419	0.0126124	5.12526	2.97125e-07	1.33644e-05	1.04583	TRIM39	protein_coding	781.44	829.876
ENSG00000114268.11	1979.34	0.130383	0.0254425	5.12461	2.98159e-07	1.3392e-05	1.09458	PFKFB4	protein_coding	1953.01	2218.28
ENSG00000132109.9	1594.94	0.113893	0.0222395	5.1212	3.03605e-07	1.35939e-05	1.08214	TRIM21	protein_coding	1641.17	1797.89
ENSG00000152926.14	2628.05	0.182485	0.0356351	5.12095	3.04005e-07	1.35939e-05	1.13484	ZNF117	protein_coding	2611.05	3022.78
ENSG00000142186.16	745.256	0.0972479	0.0189908	5.12079	3.04264e-07	1.35939e-05	1.06973	SCYL1	protein_coding	748.642	817.526
ENSG00000163421.8	2415.28	0.186455	0.0364117	5.12073	3.04356e-07	1.35939e-05	1.13796	PROK2	protein_coding	2387.67	2744.28
ENSG00000068383.18	866.53	0.0887619	0.0173357	5.12019	3.05228e-07	1.36138e-05	1.06346	INPP5A	protein_coding	888.246	964.814
ENSG00000155744.9	5873.51	0.137132	0.0267873	5.11929	3.06683e-07	1.36542e-05	1.09972	FAM126B	protein_coding	5987.1	6669.66
ENSG00000204482.10	4682.61	0.116306	0.02272	5.1191	3.0699e-07	1.36542e-05	1.08396	LST1	protein_coding	4726.97	5256.38
ENSG00000248323.6	7979.53	0.132127	0.0258248	5.11629	3.11597e-07	1.38302e-05	1.09591	LUCAT1	antisense	7943.38	9000.84
ENSG00000266957.1	8.89145	-0.145258	0.028392	-5.11616	3.11814e-07	1.38302e-05	0.904218	AC012254.1	antisense	10.1704	9.36711
ENSG00000100991.11	2279.63	0.0621806	0.0121551	5.11559	3.12766e-07	1.38532e-05	1.04404	TRPC4AP	protein_coding	2385.23	2547.16
ENSG00000111261.13	522.2	0.145766	0.0285007	5.11446	3.14635e-07	1.39167e-05	1.10632	MANSC1	protein_coding	496.4	573.788
ENSG00000134698.10	7498.47	0.0959532	0.0187678	5.11266	3.1766e-07	1.40311e-05	1.06877	AGO4	protein_coding	7672.89	8483.38
ENSG00000230783.1	10.7032	0.135215	0.0264525	5.11159	3.19454e-07	1.40908e-05	1.09826	AC009961.3	processed_pseudogene	10.7412	12.1882
ENSG00000089022.13	1485.78	-0.0456885	0.00894008	-5.11053	3.21265e-07	1.41441e-05	0.968827	MAPKAPK5	protein_coding	1641.02	1609.59
ENSG00000211455.7	2113.35	0.117783	0.0230478	5.11036	3.21548e-07	1.41441e-05	1.08507	STK38L	protein_coding	2184.83	2407.82
ENSG00000198961.9	6404.73	0.102638	0.0200903	5.10884	3.24139e-07	1.42385e-05	1.07374	PJA2	protein_coding	6662.7	7218.78
ENSG00000186260.16	508.859	-0.0852822	0.0166971	-5.10762	3.26249e-07	1.43115e-05	0.9426	MRTFB	protein_coding	581.097	544.332
ENSG00000163902.11	4374.81	0.100962	0.0197681	5.1073	3.26795e-07	1.43158e-05	1.07249	RPN1	protein_coding	4467.56	4880
ENSG00000168852.12	52.5187	-0.131506	0.0257524	-5.10655	3.28087e-07	1.43387e-05	0.912878	TPTE2P5	transcribed_unprocessed_pseudogene	60.9181	56.3092
ENSG00000249667.1	78.687	-0.144407	0.0282792	-5.10648	3.28217e-07	1.43387e-05	0.904751	LINC01259	lincRNA	93.7588	82.0092
ENSG00000183087.14	88.5819	-0.154929	0.0303436	-5.10582	3.29362e-07	1.43691e-05	0.898177	GAS6	protein_coding	99.0796	90.5368
ENSG00000169223.14	2398.25	0.0927572	0.0181735	5.10398	3.32578e-07	1.44896e-05	1.06641	LMAN2	protein_coding	2448.46	2667.56
ENSG00000244267.1	6.41386	-0.171715	0.0336464	-5.10352	3.33392e-07	1.4494e-05	0.887787	RPL34P22	processed_pseudogene	7.27876	6.65132
ENSG00000136305.11	529.127	0.104314	0.02044	5.10341	3.33587e-07	1.4494e-05	1.07498	CIDEB	protein_coding	527.96	585.345
ENSG00000158552.12	423.794	0.0808364	0.0158415	5.10281	3.34638e-07	1.45199e-05	1.05763	ZFAND2B	protein_coding	441.002	473.839
ENSG00000115170.13	304.316	-0.0825081	0.0161737	-5.10137	3.37198e-07	1.46111e-05	0.944414	ACVR1	protein_coding	350.144	326.837
ENSG00000207839.1	4.0149	0.223305	0.0437774	5.10093	3.3799e-07	1.46243e-05	1.16741	MIR33B	miRNA	3.84071	4.58158
ENSG00000196668.3	87.76	0.146104	0.0286439	5.10069	3.38417e-07	1.46243e-05	1.10658	LINC00173	processed_transcript	84.7434	98.3724
ENSG00000223819.2	24.2591	0.150972	0.0296035	5.09982	3.39983e-07	1.46552e-05	1.11032	PPIAP89	processed_pseudogene	24.9004	28.0882
ENSG00000240065.7	4389.7	0.120288	0.023587	5.09978	3.40051e-07	1.46552e-05	1.08695	PSMB9	protein_coding	4542.09	4959.58
ENSG00000119541.9	3822.82	0.0913613	0.0179183	5.09877	3.41859e-07	1.47133e-05	1.06537	VPS4B	protein_coding	3981.83	4321.48
ENSG00000178935.5	713.738	0.0787409	0.0154447	5.09826	3.42796e-07	1.47338e-05	1.0561	ZNF552	protein_coding	728.374	788.779
ENSG00000167536.13	739.086	0.136605	0.0268011	5.09698	3.45117e-07	1.48136e-05	1.09931	DHRS13	protein_coding	745.469	827.387
ENSG00000158517.13	7039.41	0.144292	0.0283128	5.09634	3.46276e-07	1.48434e-05	1.10519	NCF1	protein_coding	6855.69	7777.45
ENSG00000258216.5	4.19672	-0.208927	0.0410161	-5.09379	3.5098e-07	1.50102e-05	0.86518	AC084200.1	lincRNA	4.9646	4.33026
ENSG00000237441.9	1412.86	0.116358	0.0228435	5.09372	3.51108e-07	1.50102e-05	1.084	RGL2	protein_coding	1432.39	1606.36
ENSG00000120949.14	237.079	0.121804	0.0239198	5.09221	3.53912e-07	1.51098e-05	1.08809	TNFRSF8	protein_coding	233.372	264.717
ENSG00000169612.3	605.23	0.122664	0.0240937	5.09111	3.5597e-07	1.5161e-05	1.08874	RAMAC	protein_coding	626.456	688.892
ENSG00000186577.13	169.126	0.0984266	0.0193332	5.09106	3.5606e-07	1.5161e-05	1.07061	SMIM29	protein_coding	171.093	187.588
ENSG00000109381.19	4034.91	0.0833298	0.0163777	5.088	3.61862e-07	1.53876e-05	1.05946	ELF2	protein_coding	4199.95	4531.73
ENSG00000171862.10	17907.9	0.126847	0.0249325	5.08762	3.62578e-07	1.53975e-05	1.09191	PTEN	protein_coding	18261.5	20279.1
ENSG00000172845.14	7993.11	0.109992	0.0216292	5.08534	3.66967e-07	1.55632e-05	1.07922	SP3	protein_coding	8270.14	9052.27
ENSG00000169180.11	14979.6	0.117726	0.0231526	5.0848	3.68018e-07	1.55871e-05	1.08502	XPO6	protein_coding	15240.6	16934.8
ENSG00000113161.15	1592.55	0.0965905	0.0190018	5.08323	3.71068e-07	1.56947e-05	1.06924	HMGCR	protein_coding	1668.87	1817.53
ENSG00000111911.6	704.721	0.0925592	0.0182096	5.08299	3.71541e-07	1.56947e-05	1.06626	HINT3	protein_coding	731.077	794.701
ENSG00000172932.14	2140.31	0.10833	0.0213186	5.08149	3.74484e-07	1.57981e-05	1.07798	ANKRD13D	protein_coding	2148.02	2368.58
ENSG00000196562.14	3471.51	0.135462	0.0266749	5.07825	3.80929e-07	1.60488e-05	1.09844	SULF2	protein_coding	3372.34	3880.16
ENSG00000259972.2	354.614	-0.0735019	0.0144788	-5.07651	3.84425e-07	1.61747e-05	0.950328	AC009120.2	processed_transcript	396.159	382.65
ENSG00000100906.10	2372.25	0.108033	0.0212939	5.07343	3.90712e-07	1.64176e-05	1.07776	NFKBIA	protein_coding	2430.03	2648.39
ENSG00000273084.1	19.0439	0.175553	0.0346583	5.06526	4.07835e-07	1.70945e-05	1.1294	AC092171.5	lincRNA	18.0111	21.1289
ENSG00000137462.7	11063	0.13658	0.0269642	5.06524	4.07891e-07	1.70945e-05	1.0993	TLR2	protein_coding	11215.3	12674.2
ENSG00000248785.1	14.6551	-0.110615	0.0218443	-5.0638	4.10989e-07	1.71979e-05	0.926193	HIGD1AP14	processed_pseudogene	17.4248	15.7553
ENSG00000232104.3	174.554	-0.102413	0.0202258	-5.06349	4.11644e-07	1.71979e-05	0.931474	RFX3-AS1	lincRNA	198.124	188.663
ENSG00000110315.6	3019.51	0.119037	0.0235096	5.06334	4.11975e-07	1.71979e-05	1.08601	RNF141	protein_coding	3090.29	3451.74
ENSG00000130775.15	8903.03	0.111932	0.0221108	5.06231	4.14208e-07	1.72686e-05	1.08067	THEMIS2	protein_coding	8874.84	9855.16
ENSG00000169330.8	40.6012	-0.198839	0.0392975	-5.05984	4.19606e-07	1.74708e-05	0.871251	KIAA1024	protein_coding	46.9889	42.5237
ENSG00000164576.11	1490.78	0.0566275	0.0111942	5.05863	4.2227e-07	1.75588e-05	1.04003	SAP30L	protein_coding	1578.27	1667.27
ENSG00000108788.11	1139.22	0.0648935	0.0128321	5.05711	4.2566e-07	1.76768e-05	1.04601	MLX	protein_coding	1190.45	1269.13
ENSG00000106771.12	1519.65	-0.0805591	0.0159344	-5.05568	4.28867e-07	1.77868e-05	0.945691	TMEM245	protein_coding	1736.85	1639.72
ENSG00000120868.13	6447.37	0.0984075	0.0194674	5.05499	4.30405e-07	1.78275e-05	1.07059	APAF1	protein_coding	6613.58	7342.69
ENSG00000161526.14	1504.51	0.0640923	0.012682	5.05379	4.33119e-07	1.79053e-05	1.04543	SAP30BP	protein_coding	1582.29	1679.81
ENSG00000109466.13	2406.85	0.122863	0.0243117	5.05367	4.33404e-07	1.79053e-05	1.08889	KLHL2	protein_coding	2438.98	2723.17
ENSG00000185684.14	516.71	-0.098781	0.0195532	-5.0519	4.37431e-07	1.80483e-05	0.933822	EP400P1	transcribed_unprocessed_pseudogene	585.772	553.197
ENSG00000197965.11	2330.26	0.161805	0.0320521	5.04817	4.46054e-07	1.83803e-05	1.11869	MPZL1	protein_coding	2309.58	2662
ENSG00000213903.8	1530.67	0.136915	0.0271239	5.04776	4.47014e-07	1.83961e-05	1.09955	LTB4R	protein_coding	1493.85	1731.58
ENSG00000116685.15	1161.38	0.0889823	0.0176459	5.04266	4.59096e-07	1.8869e-05	1.06362	KIAA2013	protein_coding	1167.16	1274.46
ENSG00000256723.1	9.15284	-0.14069	0.0279119	-5.04051	4.64296e-07	1.90582e-05	0.907085	AP003717.3	processed_pseudogene	10.4314	9.71711
ENSG00000136040.8	15859.6	0.120216	0.0238518	5.0401	4.65279e-07	1.90741e-05	1.0869	PLXNC1	protein_coding	16138.1	17840.1
ENSG00000232533.1	176.573	0.116946	0.0232099	5.0386	4.68937e-07	1.91994e-05	1.08444	AC093673.1	antisense	177.509	198.466
ENSG00000255801.1	531.992	0.207792	0.0412459	5.03787	4.70736e-07	1.92408e-05	1.15492	AC092746.1	lincRNA	511.033	617.195
ENSG00000167257.10	192.49	-0.0898958	0.0178446	-5.0377	4.71154e-07	1.92408e-05	0.939591	RNF214	protein_coding	218.235	205.905
ENSG00000172765.17	1975.71	0.106105	0.0210717	5.03544	4.76765e-07	1.94451e-05	1.07632	TMCC1	protein_coding	2008.28	2221.93
ENSG00000092020.10	918.248	0.130583	0.0259482	5.03244	4.84275e-07	1.97262e-05	1.09474	PPP2R3C	protein_coding	938.881	1046.11
ENSG00000270273.1	4.77071	-0.193448	0.0384476	-5.03147	4.86739e-07	1.98013e-05	0.874513	AC121334.2	processed_pseudogene	5.75664	4.93684
ENSG00000106348.17	1371	0.126929	0.0252307	5.03074	4.88603e-07	1.98518e-05	1.09197	IMPDH1	protein_coding	1362.58	1525.96
ENSG00000123609.10	1807.61	0.121898	0.024237	5.02943	4.91937e-07	1.99619e-05	1.08817	NMI	protein_coding	1855.81	2030.61
ENSG00000077454.15	2084.75	0.0926521	0.0184288	5.02756	4.96748e-07	2.01315e-05	1.06633	LRCH4	protein_coding	2107.2	2282.18
ENSG00000234147.1	13.0619	-0.117774	0.0234296	-5.02674	4.98894e-07	2.01855e-05	0.921608	AL035446.1	lincRNA	14.8252	13.8855
ENSG00000221869.4	3719.18	0.151105	0.0300613	5.02656	4.99344e-07	2.01855e-05	1.11042	CEBPD	protein_coding	3535.34	4093.2
ENSG00000117151.12	3110.63	0.114279	0.0227488	5.02352	5.07337e-07	2.04827e-05	1.08243	CTBS	protein_coding	3190.1	3537.98
ENSG00000256361.1	53.5047	0.0590368	0.011757	5.0214	5.12963e-07	2.0678e-05	1.04177	AC027544.1	processed_pseudogene	56.1527	59.2829
ENSG00000277590.1	93.1392	0.180596	0.0359666	5.02121	5.13469e-07	2.0678e-05	1.13335	MIR7845	miRNA	87.8695	103.942
ENSG00000226253.1	17.4789	-0.101332	0.0201889	-5.01917	5.1894e-07	2.0872e-05	0.932172	MRPL35P3	processed_pseudogene	20.1106	18.7632
ENSG00000183726.10	2568.39	0.0985308	0.0196341	5.01834	5.21198e-07	2.09364e-05	1.07068	TMEM50A	protein_coding	2670.21	2893.82
ENSG00000125810.9	8285.17	0.157992	0.0315094	5.01411	5.32795e-07	2.13754e-05	1.11573	CD93	protein_coding	8185.29	9546.63
ENSG00000113580.14	6809.93	0.0814038	0.0162402	5.01248	5.37343e-07	2.15308e-05	1.05805	NR3C1	protein_coding	7132.52	7686.52
ENSG00000120063.9	5066.65	0.0890909	0.0177814	5.01034	5.43331e-07	2.17385e-05	1.0637	GNA13	protein_coding	5315.39	5685.18
ENSG00000164691.17	5247.14	0.0884814	0.0176605	5.01015	5.43888e-07	2.17385e-05	1.06325	TAGAP	protein_coding	5442.46	5803.16
ENSG00000247596.8	2123.64	0.102896	0.0205396	5.00961	5.45398e-07	2.17716e-05	1.07393	TWF2	protein_coding	2147.48	2350.31
ENSG00000136371.10	504.624	0.0986677	0.0197115	5.0056	5.5689e-07	2.22026e-05	1.07078	MTHFS	protein_coding	513.883	573.376
ENSG00000143067.4	253.63	0.122565	0.0245238	4.9978	5.79893e-07	2.30909e-05	1.08867	ZNF697	protein_coding	258.126	287.287
ENSG00000253276.2	828.586	0.128806	0.0257876	4.9949	5.88655e-07	2.34017e-05	1.09339	CCDC71L	protein_coding	836.168	924.037
ENSG00000215114.8	2477.63	0.102142	0.0204509	4.99451	5.89856e-07	2.34017e-05	1.07337	UBXN2B	protein_coding	2523.82	2770
ENSG00000143207.20	5293.61	0.0898866	0.0179971	4.9945	5.89897e-07	2.34017e-05	1.06429	COP1	protein_coding	5480.88	5978.07
ENSG00000161920.9	325.292	0.0915905	0.0183449	4.9927	5.95404e-07	2.35909e-05	1.06554	MED11	protein_coding	334.367	361.392
ENSG00000277763.1	40.4896	0.167869	0.033637	4.9906	6.01933e-07	2.382e-05	1.1234	AL138995.1	lincRNA	40.427	46.7737
ENSG00000023287.12	4155.49	0.12705	0.0254626	4.98965	6.04889e-07	2.39073e-05	1.09206	RB1CC1	protein_coding	4249.89	4687.94
ENSG00000165046.12	211.55	0.107837	0.0216183	4.98824	6.0932e-07	2.40527e-05	1.07761	LETM2	protein_coding	211.31	236.13
ENSG00000109133.12	3500.22	0.0831178	0.0166638	4.98792	6.10329e-07	2.40628e-05	1.0593	TMEM33	protein_coding	3667.14	3942.52
ENSG00000228719.1	66.3551	0.185143	0.0371309	4.98623	6.15697e-07	2.42445e-05	1.13693	AL022313.2	lincRNA	62.7898	75.6474
ENSG00000138185.19	4840.98	0.10866	0.0217971	4.98509	6.19334e-07	2.43577e-05	1.07823	ENTPD1	protein_coding	4915.05	5490.3
ENSG00000155657.26	5690.92	-0.164125	0.0329324	-4.9837	6.23783e-07	2.45025e-05	0.892469	TTN	protein_coding	6727.55	5899.4
ENSG00000078403.16	1194.49	-0.0542363	0.010885	-4.98267	6.27128e-07	2.46036e-05	0.963104	MLLT10	protein_coding	1329.69	1296.47
ENSG00000113368.11	1600.32	0.149748	0.0300621	4.98129	6.31631e-07	2.47457e-05	1.10938	LMNB1	protein_coding	1600.52	1813.21
ENSG00000197442.9	5398.48	0.0798641	0.0160343	4.98084	6.33075e-07	2.47457e-05	1.05692	MAP3K5	protein_coding	5618.9	6074.5
ENSG00000188938.16	1538.57	0.0581831	0.0116817	4.98069	6.33568e-07	2.47457e-05	1.04115	FAM120AOS	protein_coding	1596.62	1702.16
ENSG00000165650.11	2968.7	0.119245	0.023942	4.98057	6.33985e-07	2.47457e-05	1.08617	PDZD8	protein_coding	3022.61	3351.18
ENSG00000187257.15	3111.83	0.0792262	0.0159082	4.9802	6.35172e-07	2.47457e-05	1.05645	RSBN1L	protein_coding	3247.47	3486.91
ENSG00000114316.12	3248.8	0.0795982	0.0159831	4.98014	6.35399e-07	2.47457e-05	1.05672	USP4	protein_coding	3327.03	3620.61
ENSG00000271582.1	21.9437	-0.190045	0.0381638	-4.97973	6.36743e-07	2.47678e-05	0.876578	AC073111.2	processed_pseudogene	26.9314	22.7355
ENSG00000116266.10	2839.87	0.10972	0.0220404	4.97816	6.41906e-07	2.49383e-05	1.07902	STXBP3	protein_coding	2947.12	3230.4
ENSG00000169224.12	150.925	0.147344	0.0296098	4.97619	6.48487e-07	2.51633e-05	1.10753	GCSAML	protein_coding	153.695	167.555
ENSG00000144535.19	732.537	-0.0666877	0.0134022	-4.97587	6.49536e-07	2.51735e-05	0.954828	DIS3L2	protein_coding	827.619	794.303
ENSG00000245164.6	3384.51	-0.121251	0.0243731	-4.97477	6.53263e-07	2.52872e-05	0.91939	LINC00861	lincRNA	3995.07	3603.99
ENSG00000085982.13	404.575	-0.0809731	0.0162838	-4.97263	6.60495e-07	2.55362e-05	0.94542	USP40	protein_coding	459.338	438.958
ENSG00000164032.11	2442.92	0.115677	0.0232717	4.97072	6.67064e-07	2.5759e-05	1.08348	H2AFZ	protein_coding	2526.52	2795.32
ENSG00000246203.2	22.0324	-0.0903377	0.0181818	-4.96858	6.74454e-07	2.60129e-05	0.939303	AL353807.3	unprocessed_pseudogene	24.3496	23.4421
ENSG00000102032.12	362.56	0.0955095	0.0192294	4.96686	6.80465e-07	2.62131e-05	1.06844	RENBP	protein_coding	369.015	404.854
ENSG00000226842.1	10.4662	0.133421	0.0268712	4.96521	6.86261e-07	2.63812e-05	1.09689	AL158834.1	antisense	10.4447	11.8105
ENSG00000247624.6	144.227	0.0872866	0.0175799	4.96515	6.86481e-07	2.63812e-05	1.06237	CPEB2-DT	lincRNA	147.872	161.954
ENSG00000131389.17	11874.1	0.117877	0.0237444	4.96441	6.89103e-07	2.64501e-05	1.08514	SLC6A6	protein_coding	11878.9	13322.6
ENSG00000271320.1	5.018	-0.185738	0.0374349	-4.96162	6.99076e-07	2.68007e-05	0.879199	AC091488.1	lincRNA	5.94912	5.27763
ENSG00000169692.12	488.448	0.116115	0.0234094	4.96019	7.04228e-07	2.69656e-05	1.08381	AGPAT2	protein_coding	485.522	542.141
ENSG00000172780.16	1533.03	0.0981784	0.0197949	4.95977	7.05764e-07	2.69656e-05	1.07042	RAB43	protein_coding	1552.78	1680.21
ENSG00000132405.18	4539.66	0.101856	0.0205366	4.95973	7.0591e-07	2.69656e-05	1.07315	TBC1D14	protein_coding	4608.59	5077.8
ENSG00000269374.1	23.385	0.0870927	0.0175687	4.95726	7.1494e-07	2.72779e-05	1.06223	AC011497.2	processed_pseudogene	24.9004	26.9776
ENSG00000198814.12	4223.01	0.140116	0.0282683	4.95666	7.17163e-07	2.73301e-05	1.10199	GK	protein_coding	4374.88	4772.05
ENSG00000026103.21	1926.63	0.126262	0.0254821	4.95491	7.23643e-07	2.75245e-05	1.09146	FAS	protein_coding	1990.08	2162.81
ENSG00000138443.15	803.787	-0.0835063	0.016854	-4.95469	7.24469e-07	2.75245e-05	0.943761	ABI2	protein_coding	912.111	866.466
ENSG00000177105.9	488.314	0.129151	0.026067	4.95458	7.24852e-07	2.75245e-05	1.09365	RHOG	protein_coding	476.235	533.626
ENSG00000225673.3	6.01397	-0.169813	0.0342829	-4.95329	7.29694e-07	2.76755e-05	0.888958	AC104164.1	processed_pseudogene	7.05088	6.35789
ENSG00000242999.3	118.869	0.0766325	0.0154786	4.95086	7.38864e-07	2.79843e-05	1.05455	RN7SL239P	misc_RNA	125.6	133.979
ENSG00000102879.15	9429.03	0.106125	0.0214366	4.95067	7.39587e-07	2.79843e-05	1.07633	CORO1A	protein_coding	9491.16	10338.7
ENSG00000133872.13	8498.65	0.0968307	0.0195688	4.94821	7.48973e-07	2.83059e-05	1.06942	SARAF	protein_coding	8867.17	9414.95
ENSG00000124226.10	1867.58	0.0639434	0.0129292	4.94566	7.58849e-07	2.86452e-05	1.04532	RNF114	protein_coding	1956.98	2070.34
ENSG00000171302.16	1143.84	0.10586	0.021408	4.94487	7.61955e-07	2.87247e-05	1.07614	CANT1	protein_coding	1151.45	1258.53
ENSG00000119535.17	21381	0.148803	0.0300937	4.94466	7.62753e-07	2.87247e-05	1.10865	CSF3R	protein_coding	20846.3	23768
ENSG00000227704.1	11.0427	-0.127543	0.0257997	-4.94361	7.66903e-07	2.88469e-05	0.915389	AL354892.1	antisense	12.3407	11.3184
ENSG00000274370.1	123.347	0.153152	0.0309914	4.94176	7.74201e-07	2.90872e-05	1.112	AC130371.2	lincRNA	121.166	137.717
ENSG00000196923.13	444.292	0.17262	0.034951	4.93893	7.85529e-07	2.94781e-05	1.1271	PDLIM7	protein_coding	417.881	486.628
ENSG00000013364.18	5929.04	0.105674	0.0214008	4.93783	7.89953e-07	2.95758e-05	1.076	MVP	protein_coding	5990.15	6566.44
ENSG00000021574.12	1708.73	0.0825992	0.0167279	4.93783	7.89985e-07	2.95758e-05	1.05892	SPAST	protein_coding	1770.44	1905.22
ENSG00000152684.10	294.002	0.101396	0.0205419	4.93606	7.97168e-07	2.98036e-05	1.07281	PELO	protein_coding	303.352	332.425
ENSG00000272196.2	12508.8	0.138627	0.0280856	4.93587	7.97937e-07	2.98036e-05	1.10086	HIST2H2AA4	protein_coding	12260.9	13887.2
ENSG00000119655.10	1627.44	0.109777	0.0222489	4.93406	8.0538e-07	3.00465e-05	1.07906	NPC2	protein_coding	1661	1827.02
ENSG00000213085.9	175.381	0.170846	0.0346333	4.93301	8.09741e-07	3.01739e-05	1.12572	CFAP45	protein_coding	172.473	197.911
ENSG00000143653.9	269.262	0.135683	0.0275095	4.93224	8.1292e-07	3.02551e-05	1.09861	SCCPDH	protein_coding	274.4	305.799
ENSG00000249965.2	7.17143	-0.155796	0.0315886	-4.93203	8.13814e-07	3.02551e-05	0.897637	CDC42P4	processed_pseudogene	8.29867	7.46184
ENSG00000106462.10	202.663	-0.103222	0.0209309	-4.93157	8.15723e-07	3.02908e-05	0.930951	EZH2	protein_coding	230.062	217.675
ENSG00000109586.11	1133.65	0.0705037	0.0142999	4.93035	8.20805e-07	3.04441e-05	1.05008	GALNT7	protein_coding	1199.95	1280.08
ENSG00000121931.15	659.367	0.112808	0.0228814	4.9301	8.21895e-07	3.04492e-05	1.08133	LRIF1	protein_coding	680.241	741.05
ENSG00000137449.15	1398.83	0.115547	0.0234515	4.92705	8.34791e-07	3.08911e-05	1.08339	CPEB2	protein_coding	1441.12	1599.62
ENSG00000059377.16	6017.5	0.105937	0.0215053	4.92608	8.38973e-07	3.10099e-05	1.07619	TBXAS1	protein_coding	6114.06	6815.34
ENSG00000172243.17	8607.62	0.114784	0.0233054	4.92523	8.42594e-07	3.11078e-05	1.08281	CLEC7A	protein_coding	8851.87	9753.95
ENSG00000114353.16	3397.17	0.106234	0.021576	4.92372	8.49157e-07	3.13139e-05	1.07641	GNAI2	protein_coding	3409.95	3756.63
ENSG00000237628.2	2.56507	-0.254334	0.0516744	-4.92187	8.57213e-07	3.15745e-05	0.838374	MTCO2P19	processed_pseudogene	3.13496	2.69079
ENSG00000150977.10	2133.87	0.079196	0.0161034	4.91797	8.74461e-07	3.21727e-05	1.05643	RILPL2	protein_coding	2173.46	2354.14
ENSG00000142409.5	991.185	0.102167	0.0207839	4.91568	8.84754e-07	3.24995e-05	1.07338	ZNF787	protein_coding	989.535	1091.96
ENSG00000175029.16	1780.28	0.0747689	0.0152107	4.91554	8.85378e-07	3.24995e-05	1.05319	CTBP2	protein_coding	1818.58	1992.6
ENSG00000028137.18	7674.07	0.109025	0.0221815	4.91512	8.8727e-07	3.25315e-05	1.0785	TNFRSF1B	protein_coding	7681.8	8453.89
ENSG00000114738.10	2450.85	0.0879576	0.017897	4.91466	8.8936e-07	3.2559e-05	1.06286	MAPKAPK3	protein_coding	2506.52	2735.14
ENSG00000123444.13	601.282	0.0785463	0.0159825	4.91451	8.90059e-07	3.2559e-05	1.05595	KBTBD4	protein_coding	631.44	673.745
ENSG00000213373.7	67.9776	0.153591	0.0312785	4.91041	9.08845e-07	3.31916e-05	1.11233	LINC00671	lincRNA	65.5819	77.4697
ENSG00000131100.12	1819.31	0.0950898	0.0193654	4.91029	9.09429e-07	3.31916e-05	1.06813	ATP6V1E1	protein_coding	1882.33	2045.01
ENSG00000164096.12	2366.23	0.115035	0.0234348	4.90872	9.16706e-07	3.34097e-05	1.083	C4orf3	protein_coding	2477.08	2674.44
ENSG00000252452.1	18.1655	-0.0971847	0.019799	-4.90856	9.17498e-07	3.34097e-05	0.934855	RNU6-107P	snRNA	20.6881	19.5684
ENSG00000118515.11	2448.18	0.119747	0.0244057	4.90653	9.2702e-07	3.3718e-05	1.08654	SGK1	protein_coding	2489.63	2760.77
ENSG00000152443.12	1581.44	0.0822139	0.0167595	4.90551	9.31834e-07	3.38272e-05	1.05864	ZNF776	protein_coding	1638.19	1759.82
ENSG00000196812.4	268.522	0.102381	0.0208708	4.90545	9.32141e-07	3.38272e-05	1.07354	ZSCAN16	protein_coding	277.608	300.8
ENSG00000039319.16	4209.21	0.106668	0.0217473	4.90485	9.34965e-07	3.38827e-05	1.07674	ZFYVE16	protein_coding	4355.98	4808.71
ENSG00000142347.17	13119.1	0.124129	0.0253082	4.90468	9.35792e-07	3.38827e-05	1.08985	MYO1F	protein_coding	13008.7	14562
ENSG00000155926.13	12540.5	0.100867	0.0205774	4.90183	9.49476e-07	3.43133e-05	1.07242	SLA	protein_coding	12747.7	14115.2
ENSG00000235749.2	48.7225	0.135716	0.0276873	4.90176	9.49835e-07	3.43133e-05	1.09864	AL390860.1	antisense	49.3319	55.8237
ENSG00000182544.8	442.494	0.0928841	0.0189535	4.90065	9.55225e-07	3.4469e-05	1.0665	MFSD5	protein_coding	454.998	490.967
ENSG00000114626.17	2909.23	0.152925	0.0312075	4.90028	9.57017e-07	3.44947e-05	1.11182	ABTB1	protein_coding	2838.9	3272.64
ENSG00000105397.13	4425.81	0.0921323	0.018803	4.89986	9.59047e-07	3.45289e-05	1.06594	TYK2	protein_coding	4494.65	4900.44
ENSG00000172409.5	324.969	0.08543	0.0174377	4.89915	9.62506e-07	3.46144e-05	1.061	CLP1	protein_coding	339.792	366.737
ENSG00000228666.1	19.0559	0.0969969	0.0198016	4.89843	9.66036e-07	3.47023e-05	1.06954	KRT18P1	processed_pseudogene	19.5288	21.1908
ENSG00000198818.9	927.961	0.074634	0.0152441	4.89593	9.78425e-07	3.51079e-05	1.05309	SFT2D1	protein_coding	970.21	1046.46
ENSG00000116209.11	3339.01	0.101387	0.0207162	4.89408	9.87649e-07	3.53991e-05	1.0728	TMEM59	protein_coding	3440.1	3741
ENSG00000234432.4	75.8691	0.150805	0.0308178	4.89342	9.90997e-07	3.54724e-05	1.11019	AC092171.3	lincRNA	71.8296	84.1776
ENSG00000165115.14	867.877	0.136402	0.0278756	4.89324	9.91917e-07	3.54724e-05	1.09916	KIF27	protein_coding	859.279	992.159
ENSG00000147099.20	1278.44	-0.0746127	0.015249	-4.89294	9.93414e-07	3.54862e-05	0.949597	HDAC8	protein_coding	1430.44	1385.25
ENSG00000197903.7	637.413	0.114	0.0233036	4.89193	9.98496e-07	3.56279e-05	1.08222	HIST1H2BK	protein_coding	633.181	696.774
ENSG00000281162.2	679.97	0.18005	0.0368186	4.89018	1.00744e-06	3.5907e-05	1.13292	LINC01127	lincRNA	661.425	787.121
ENSG00000174574.15	2162.6	0.0761174	0.0155667	4.88977	1.00954e-06	3.59415e-05	1.05418	AKIRIN1	protein_coding	2248.39	2395.77
ENSG00000063322.13	594.639	0.0598747	0.0122455	4.88951	1.01087e-06	3.59488e-05	1.04238	MED29	protein_coding	610.369	645.855
ENSG00000103381.11	7096.05	0.1209	0.0247303	4.88873	1.01488e-06	3.60515e-05	1.08741	CPPED1	protein_coding	7117.03	8003.4
ENSG00000165092.12	705.992	0.168612	0.0345057	4.8865	1.02647e-06	3.64225e-05	1.12398	ALDH1A1	protein_coding	711.33	809.957
ENSG00000144848.10	2020.81	0.106656	0.0218284	4.88612	1.02845e-06	3.64523e-05	1.07673	ATG3	protein_coding	2091.75	2276.38
ENSG00000223705.9	816.801	-0.10418	0.0213252	-4.88532	1.03262e-06	3.65596e-05	0.930333	NSUN5P1	transcribed_unprocessed_pseudogene	936.841	870.124
ENSG00000185963.13	2566.34	0.079947	0.0163669	4.88468	1.03597e-06	3.66376e-05	1.05698	BICD2	protein_coding	2649.09	2871.89
ENSG00000226410.1	13.377	-0.202676	0.0414957	-4.88425	1.03821e-06	3.66762e-05	0.868938	AC104058.1	processed_pseudogene	16.0553	14.1368
ENSG00000173011.11	1568.95	0.0603159	0.0123505	4.88367	1.04128e-06	3.67441e-05	1.04269	TADA2B	protein_coding	1631.8	1735.94
ENSG00000142694.6	136.569	0.1388	0.0284276	4.88259	1.04699e-06	3.69048e-05	1.10099	EVA1B	protein_coding	134.192	151.03
ENSG00000156304.14	527.222	-0.0666441	0.0136549	-4.88062	1.05755e-06	3.72358e-05	0.954857	SCAF4	protein_coding	589.046	571.367
ENSG00000141968.7	4205.53	0.0854767	0.0175148	4.88027	1.05942e-06	3.72607e-05	1.06104	VAV1	protein_coding	4340.21	4701.68
ENSG00000105669.13	1012.28	0.101911	0.0208955	4.87717	1.07616e-06	3.78077e-05	1.07319	COPE	protein_coding	1009.18	1103.95
ENSG00000257122.5	364.105	-0.0660699	0.0135485	-4.87653	1.07969e-06	3.78898e-05	0.955237	RRN3P3	transcribed_unprocessed_pseudogene	396.265	383.782
ENSG00000172007.5	932.424	0.103592	0.0212547	4.87385	1.09443e-06	3.83651e-05	1.07445	RAB33B	protein_coding	959.268	1045.55
ENSG00000105443.14	799.86	0.0656772	0.0134767	4.8734	1.09693e-06	3.84106e-05	1.04658	CYTH2	protein_coding	831.155	885.388
ENSG00000116830.11	519.13	-0.0777895	0.0159633	-4.87303	1.09902e-06	3.84415e-05	0.947508	TTF2	protein_coding	585.976	562.114
ENSG00000131016.16	244.276	0.320061	0.0656924	4.87211	1.10412e-06	3.85777e-05	1.24838	AKAP12	protein_coding	233.843	280.605
ENSG00000172830.12	304.473	0.116043	0.0238193	4.8718	1.10586e-06	3.85962e-05	1.08376	SSH3	protein_coding	300.108	338.001
ENSG00000234705.1	17.918	0.100041	0.0205384	4.87094	1.11071e-06	3.86823e-05	1.0718	HMGA1P4	antisense	18.2257	19.75
ENSG00000131165.14	527.344	0.0925314	0.0189967	4.87093	1.11074e-06	3.86823e-05	1.06624	CHMP1A	protein_coding	532.779	582.746
ENSG00000171763.18	546.336	0.0886696	0.0182048	4.87067	1.11222e-06	3.86914e-05	1.06339	SPATA5L1	protein_coding	563.741	609.488
ENSG00000258476.5	225.126	0.226859	0.0465856	4.86972	1.11757e-06	3.88354e-05	1.17028	LINC02207	lincRNA	207.407	265.572
ENSG00000219085.1	132.751	0.152381	0.0313038	4.86781	1.12839e-06	3.91687e-05	1.1114	NPM1P37	processed_pseudogene	135.197	152.001
ENSG00000223621.1	12.453	-0.116654	0.0239658	-4.86752	1.13007e-06	3.91842e-05	0.922324	AK4P4	processed_pseudogene	14.0708	13.4197
ENSG00000165355.7	1568.88	0.0897348	0.0184381	4.86681	1.13415e-06	3.92373e-05	1.06417	FBXO33	protein_coding	1636.2	1765.96
ENSG00000176681.14	406.053	-0.188866	0.0388071	-4.86678	1.1343e-06	3.92373e-05	0.877295	LRRC37A	protein_coding	465.327	425.412
ENSG00000236021.1	81.6825	0.187807	0.038591	4.86661	1.13528e-06	3.92373e-05	1.13903	AL359265.3	antisense	80.115	93.2632
ENSG00000106636.7	1022.07	0.0639156	0.0131359	4.86573	1.14036e-06	3.93701e-05	1.0453	YKT6	protein_coding	1073.86	1141.66
ENSG00000115520.8	1127.78	0.0936807	0.0192598	4.86406	1.15004e-06	3.96616e-05	1.06709	COQ10B	protein_coding	1166.96	1263.36
ENSG00000266504.1	46.8618	-0.179996	0.037021	-4.862	1.16208e-06	4.00335e-05	0.882705	RDM1P1	transcribed_unprocessed_pseudogene	54.3385	49.4487
ENSG00000101343.14	1751.13	0.0943316	0.019408	4.86045	1.17118e-06	4.03035e-05	1.06757	CRNKL1	protein_coding	1835.91	1974.01
ENSG00000127528.5	2990.53	0.0869074	0.0178937	4.85686	1.19259e-06	4.09961e-05	1.06209	KLF2	protein_coding	3023.55	3260.14
ENSG00000068366.19	3709.12	0.120571	0.0248289	4.85609	1.19725e-06	4.10806e-05	1.08717	ACSL4	protein_coding	3817.08	4210.18
ENSG00000258215.1	129.392	0.147115	0.0302953	4.85603	1.19762e-06	4.10806e-05	1.10735	AC078886.1	processed_pseudogene	128.896	148.978
ENSG00000032219.18	2944.08	0.103233	0.0212619	4.8553	1.20204e-06	4.11879e-05	1.07418	ARID4A	protein_coding	3064.96	3326.73
ENSG00000100926.14	550.596	0.0719342	0.0148213	4.85343	1.21342e-06	4.15333e-05	1.05112	TM9SF1	protein_coding	569.449	607.671
ENSG00000183690.12	158.109	0.124864	0.0257311	4.85264	1.21829e-06	4.16555e-05	1.0904	EFHC2	protein_coding	164.181	177.593
ENSG00000137767.13	2593.8	0.105259	0.0216936	4.85208	1.22175e-06	4.17289e-05	1.07569	SQOR	protein_coding	2649.33	2917.9
ENSG00000117118.9	992.117	0.0865538	0.0178417	4.85119	1.2272e-06	4.18704e-05	1.06183	SDHB	protein_coding	1019.31	1108.49
ENSG00000177410.12	1720.78	0.10423	0.021487	4.85083	1.22944e-06	4.19019e-05	1.07492	ZFAS1	antisense	1782.42	1956.72
ENSG00000131355.14	1801.89	0.125639	0.0259059	4.8498	1.23588e-06	4.20766e-05	1.09099	ADGRE3	protein_coding	1798.47	2048.49
ENSG00000277602.1	9.95036	0.134037	0.0276475	4.84809	1.24657e-06	4.23952e-05	1.09736	AC005363.2	lincRNA	9.89602	11.1395
ENSG00000102100.15	168.95	0.0768101	0.0158448	4.84764	1.2494e-06	4.24463e-05	1.05468	SLC35A2	protein_coding	174.81	188.629
ENSG00000123815.11	528.782	0.0666583	0.0137577	4.84517	1.265e-06	4.29307e-05	1.04729	COQ8B	protein_coding	543.341	585.007
ENSG00000157557.11	1988.86	0.108939	0.0224892	4.84406	1.27215e-06	4.30583e-05	1.07843	ETS2	protein_coding	2017.98	2212.99
ENSG00000158825.5	380.121	0.165649	0.0341968	4.84399	1.27259e-06	4.30583e-05	1.12167	CDA	protein_coding	366.511	433.928
ENSG00000129518.8	749.928	0.12692	0.0262018	4.84395	1.2728e-06	4.30583e-05	1.09196	EAPP	protein_coding	769.159	844.029
ENSG00000146828.17	2626.26	0.106226	0.021941	4.84145	1.28897e-06	4.3519e-05	1.07641	SLC12A9	protein_coding	2643.02	2905.77
ENSG00000240207.6	71.8219	-0.12495	0.0258096	-4.84124	1.2903e-06	4.3519e-05	0.917036	AC080013.1	antisense	83.25	77.4763
ENSG00000109756.9	4153.17	0.100226	0.0207036	4.84102	1.29177e-06	4.3519e-05	1.07194	RAPGEF2	protein_coding	4253.36	4664.22
ENSG00000231508.1	3.98177	0.214075	0.0442212	4.841	1.29187e-06	4.3519e-05	1.15996	RPL34P20	processed_pseudogene	3.82522	4.48026
ENSG00000235532.1	655.672	-0.153949	0.0318047	-4.84043	1.29561e-06	4.35987e-05	0.898787	LINC00402	lincRNA	777.321	687.263
ENSG00000170006.11	16628.7	0.102415	0.0211592	4.8402	1.29708e-06	4.36025e-05	1.07357	TMEM154	protein_coding	17030.8	18719.6
ENSG00000226056.1	3.79612	-0.209946	0.0433785	-4.83987	1.29924e-06	4.36289e-05	0.86457	MTND4P32	processed_pseudogene	4.43805	3.96447
ENSG00000067182.7	2076.23	0.122825	0.0253944	4.83668	1.32025e-06	4.42807e-05	1.08886	TNFRSF1A	protein_coding	2075.85	2305.31
ENSG00000214135.8	713.322	-0.0543278	0.0112329	-4.8365	1.32142e-06	4.42807e-05	0.963043	AC132008.2	transcribed_unprocessed_pseudogene	785.476	771.096
ENSG00000244045.12	712.397	0.0458436	0.00947946	4.8361	1.32412e-06	4.43247e-05	1.03229	TMEM199	protein_coding	759.069	793.47
ENSG00000263961.7	37.9401	0.264471	0.0546908	4.83575	1.32646e-06	4.43564e-05	1.2012	RHEX	protein_coding	35.7832	44.0724
ENSG00000234663.6	864.016	-0.102442	0.0211853	-4.83553	1.3279e-06	4.43582e-05	0.931455	LINC01934	lincRNA	999.281	925.553
ENSG00000133030.20	3369.86	-0.089469	0.0185036	-4.83523	1.32992e-06	4.43792e-05	0.939869	MPRIP	protein_coding	3825.14	3602.49
ENSG00000269001.2	871.303	0.130529	0.0270063	4.83328	1.34301e-06	4.47631e-05	1.0947	AC092070.2	transcribed_unprocessed_pseudogene	895.139	978.375
ENSG00000125538.11	925.596	0.1405	0.0290716	4.83291	1.34552e-06	4.47631e-05	1.10229	IL1B	protein_coding	942.223	1035.05
ENSG00000064932.15	2280.77	0.150653	0.0311724	4.83289	1.34563e-06	4.47631e-05	1.11007	SBNO2	protein_coding	2233.09	2478.46
ENSG00000101972.18	8191.12	0.132263	0.0273717	4.8321	1.35098e-06	4.48943e-05	1.09601	STAG2	protein_coding	8389.79	9277.83
ENSG00000119682.16	3517.84	0.0712124	0.014749	4.82828	1.37716e-06	4.57168e-05	1.0506	AREL1	protein_coding	3650.54	3930.61
ENSG00000229512.1	57.7814	0.136796	0.0283478	4.82562	1.39566e-06	4.6283e-05	1.09946	AC068580.1	sense_intronic	56.4115	64.6316
ENSG00000136197.12	446.776	0.110703	0.0229538	4.82284	1.41527e-06	4.68845e-05	1.07975	C7orf25	protein_coding	458.024	506.303
ENSG00000130856.16	1210.67	-0.0562138	0.0116595	-4.82127	1.42646e-06	4.72062e-05	0.961785	ZNF236	protein_coding	1334.17	1304.25
ENSG00000197771.12	2670.44	0.0796398	0.0165254	4.81925	1.44098e-06	4.76374e-05	1.05675	MCMBP	protein_coding	2782.25	2989.89
ENSG00000137806.8	288.962	0.0884616	0.0183578	4.81876	1.44456e-06	4.77063e-05	1.06324	NDUFAF1	protein_coding	302.345	327.041
ENSG00000125505.16	1514.68	0.154102	0.0319841	4.81808	1.44946e-06	4.78187e-05	1.11273	MBOAT7	protein_coding	1461.21	1663.14
ENSG00000276058.1	80.8746	0.121816	0.025288	4.81715	1.45622e-06	4.79921e-05	1.0881	STMN1P1	processed_pseudogene	83.5553	91.8316
ENSG00000136279.20	9756.42	0.0761985	0.0158318	4.81302	1.48669e-06	4.89458e-05	1.05424	DBNL	protein_coding	10001.6	10804
ENSG00000166478.9	1090.21	0.0736542	0.0153099	4.81089	1.50259e-06	4.94043e-05	1.05238	ZNF143	protein_coding	1140.45	1223.21
ENSG00000162236.11	614.762	0.0610697	0.0126945	4.81074	1.50371e-06	4.94043e-05	1.04324	STX5	protein_coding	635.858	677.605
ENSG00000267519.6	4282.02	0.131054	0.0272521	4.80895	1.51729e-06	4.97992e-05	1.09509	AC020916.1	antisense	4240.15	4737.49
ENSG00000128335.13	3098.3	0.110683	0.02304	4.80394	1.55573e-06	5.10084e-05	1.07974	APOL2	protein_coding	3225.21	3487.87
ENSG00000128016.5	1313.03	0.117293	0.0244184	4.80345	1.55952e-06	5.10804e-05	1.0847	ZFP36	protein_coding	1285.2	1424.99
ENSG00000119392.14	1037.35	0.0630309	0.0131261	4.80194	1.57133e-06	5.14145e-05	1.04466	GLE1	protein_coding	1080.29	1149.07
ENSG00000144228.8	4954.75	0.116592	0.024283	4.80138	1.57573e-06	5.15054e-05	1.08417	SPOPL	protein_coding	5116.45	5688.17
ENSG00000277579.1	13.6749	-0.111294	0.0231939	-4.79841	1.59926e-06	5.22213e-05	0.925757	AC244093.3	sense_intronic	15.0996	14.1947
ENSG00000225484.6	2690.37	-0.114319	0.0238331	-4.79665	1.61341e-06	5.26295e-05	0.923818	NUTM2B-AS1	antisense	3093.1	2947.82
ENSG00000197872.11	3002.56	0.0859703	0.017928	4.79531	1.62425e-06	5.29102e-05	1.0614	FAM49A	protein_coding	3099.94	3405.08
ENSG00000236088.9	635.723	-0.0664694	0.0138617	-4.79517	1.62533e-06	5.29102e-05	0.954972	COX10-AS1	processed_transcript	711.035	686.22
ENSG00000196684.12	1064.76	0.137178	0.028612	4.79441	1.63152e-06	5.30575e-05	1.09975	HSH2D	protein_coding	1051	1181.81
ENSG00000189180.15	4261.72	0.0862893	0.0180003	4.79377	1.63675e-06	5.30815e-05	1.06164	ZNF33A	protein_coding	4440.03	4779.74
ENSG00000156170.12	298.607	-0.0551331	0.011501	-4.79376	1.63687e-06	5.30815e-05	0.962506	NDUFAF6	protein_coding	331.765	322.066
ENSG00000175489.9	1214.59	0.1236	0.0257837	4.79371	1.63724e-06	5.30815e-05	1.08945	LRRC25	protein_coding	1205.93	1349.37
ENSG00000170836.11	868.314	0.0473865	0.00989123	4.79076	1.66155e-06	5.38149e-05	1.03339	PPM1D	protein_coding	912.153	964.349
ENSG00000167995.15	1212.6	0.136843	0.0285681	4.79005	1.66744e-06	5.3926e-05	1.0995	BEST1	protein_coding	1183.61	1348.06
ENSG00000217555.12	2085.07	0.125175	0.0261337	4.78978	1.6696e-06	5.3926e-05	1.09064	CKLF	protein_coding	2137.24	2379.42
ENSG00000126768.12	517.401	0.0870365	0.0181715	4.78973	1.67004e-06	5.3926e-05	1.06219	TIMM17B	protein_coding	525.558	569.733
ENSG00000223547.9	880.751	0.111825	0.0233488	4.78932	1.67343e-06	5.39809e-05	1.08059	ZNF844	protein_coding	901.748	986.304
ENSG00000158710.14	11392.4	0.124178	0.0259349	4.78807	1.68391e-06	5.42225e-05	1.08989	TAGLN2	protein_coding	11519.4	12653.1
ENSG00000163694.14	3685.38	0.122242	0.0255308	4.78802	1.68432e-06	5.42225e-05	1.08843	RBM47	protein_coding	3691.18	4101.52
ENSG00000240463.1	35.9517	0.069054	0.0144242	4.78738	1.68971e-06	5.43413e-05	1.04903	RPS19P3	processed_pseudogene	37.1195	39.5697
ENSG00000279491.1	186.423	0.090813	0.0189713	4.78685	1.69417e-06	5.44171e-05	1.06497	AP003733.4	TEC	186.885	204.266
ENSG00000233184.6	191.362	-0.112651	0.0235345	-4.78662	1.69611e-06	5.44171e-05	0.924887	AC093157.1	antisense	227.482	204.887
ENSG00000273454.1	25.0481	-0.0802606	0.0167681	-4.7865	1.69718e-06	5.44171e-05	0.945887	AC112503.2	lincRNA	28.9071	27.3961
ENSG00000243896.4	30.5164	-0.242373	0.0506479	-4.78546	1.70597e-06	5.4644e-05	0.845354	OR2A7	protein_coding	35.5575	30.9237
ENSG00000106829.18	3643.16	0.0685031	0.0143181	4.78439	1.71511e-06	5.48817e-05	1.04863	TLE4	protein_coding	3762.97	4046.18
ENSG00000114331.13	10268.6	0.0908915	0.0190081	4.78173	1.73789e-06	5.55552e-05	1.06503	ACAP2	protein_coding	10706.6	11634.7
ENSG00000152804.10	569.202	0.108398	0.0226712	4.78131	1.74159e-06	5.56176e-05	1.07803	HHEX	protein_coding	580.345	640.611
ENSG00000125734.15	597.143	0.088552	0.0185236	4.78049	1.74872e-06	5.57896e-05	1.0633	GPR108	protein_coding	613.462	662.739
ENSG00000171988.18	10964.2	0.0899881	0.0188289	4.77927	1.75936e-06	5.60729e-05	1.06436	JMJD1C	protein_coding	11475.6	12349.8
ENSG00000116991.10	1571.08	0.168743	0.0353182	4.7778	1.77224e-06	5.64273e-05	1.12408	SIPA1L2	protein_coding	1530.81	1789.23
ENSG00000196663.15	3204.34	0.131807	0.0275906	4.77724	1.77714e-06	5.65268e-05	1.09567	TECPR2	protein_coding	3202.05	3601.89
ENSG00000267526.1	17.391	-0.0965257	0.0202122	-4.77561	1.79162e-06	5.69309e-05	0.935283	AC005702.2	processed_pseudogene	19.7544	18.8987
ENSG00000163220.10	69362.4	0.188287	0.039431	4.7751	1.7962e-06	5.70197e-05	1.13941	S100A9	protein_coding	66595.2	78474.8
ENSG00000224972.1	51.2136	-0.159544	0.0334133	-4.77487	1.79827e-06	5.70284e-05	0.895308	AL513412.1	sense_intronic	60.792	55.4961
ENSG00000170190.15	234.718	0.128541	0.0269249	4.77404	1.8057e-06	5.72075e-05	1.09319	SLC16A5	protein_coding	228.723	259.324
ENSG00000240303.7	554.191	-0.0816347	0.0171008	-4.77374	1.8084e-06	5.72361e-05	0.944986	ACAD11	protein_coding	638.288	605.099
ENSG00000147526.19	6602.23	0.0655044	0.0137256	4.77242	1.8203e-06	5.75557e-05	1.04645	TACC1	protein_coding	6918.42	7415.89
ENSG00000203747.10	6931.86	0.163751	0.0343202	4.77128	1.83058e-06	5.77787e-05	1.1202	FCGR3A	protein_coding	6922.16	7957.28
ENSG00000156273.15	12168.3	0.106546	0.0223309	4.77124	1.83097e-06	5.77787e-05	1.07665	BACH1	protein_coding	12554.9	13769.2
ENSG00000092199.17	12919.1	0.0811206	0.0170048	4.77045	1.83813e-06	5.79475e-05	1.05784	HNRNPC	protein_coding	13620.9	14512.9
ENSG00000160783.19	623.222	0.0796714	0.0167035	4.76974	1.84467e-06	5.80963e-05	1.05678	PMF1	protein_coding	635.925	692.109
ENSG00000012779.10	6118.14	0.117198	0.0245746	4.76906	1.85086e-06	5.82092e-05	1.08463	ALOX5	protein_coding	6073.24	6793.03
ENSG00000272037.1	55.1	0.128105	0.0268624	4.76895	1.8519e-06	5.82092e-05	1.09286	AP002907.1	antisense	54.5442	60.9474
ENSG00000104388.14	2052.98	0.086781	0.0182046	4.76697	1.87017e-06	5.87256e-05	1.062	RAB2A	protein_coding	2143.75	2318.12
ENSG00000143570.17	868.914	0.087077	0.0182837	4.76255	1.91162e-06	5.99682e-05	1.06222	SLC39A1	protein_coding	895.527	973.611
ENSG00000127824.13	2085.43	0.105921	0.0222421	4.76218	1.91509e-06	6.00179e-05	1.07618	TUBA4A	protein_coding	2092.05	2270.96
ENSG00000024048.10	11060.7	0.0854855	0.017955	4.76109	1.92549e-06	6.02849e-05	1.06104	UBR2	protein_coding	11488.1	12433.2
ENSG00000130592.15	9191.07	0.128594	0.0270127	4.76051	1.93108e-06	6.04008e-05	1.09323	LSP1	protein_coding	9130.8	10091.8
ENSG00000136861.17	1775.26	-0.0609504	0.0128053	-4.75978	1.93802e-06	6.05585e-05	0.958632	CDK5RAP2	protein_coding	2000.95	1934.5
ENSG00000153207.15	6169.91	0.0912822	0.0191798	4.75928	1.94286e-06	6.06503e-05	1.06532	AHCTF1	protein_coding	6368.67	6953
ENSG00000123684.12	5934.18	0.0921948	0.0193731	4.75892	1.94635e-06	6.06999e-05	1.06599	LPGAT1	protein_coding	6178.85	6772.5
ENSG00000284154.1	21.5752	0.181523	0.0381487	4.75829	1.95239e-06	6.08289e-05	1.13408	MIR3605	miRNA	20.9447	24.8303
ENSG00000216813.1	19.5561	-0.0904503	0.0190166	-4.75639	1.9709e-06	6.13458e-05	0.93923	AL358178.1	processed_pseudogene	22.5752	21.1276
ENSG00000160785.13	1327.53	0.0917279	0.0192986	4.75307	2.00347e-06	6.22987e-05	1.06565	SLC25A44	protein_coding	1357.17	1482.48
ENSG00000280388.1	260.225	0.0611695	0.0128747	4.75113	2.02287e-06	6.28407e-05	1.04331	AC006330.1	TEC	267.504	283.999
ENSG00000155256.17	1463.12	0.0578315	0.0121735	4.75062	2.02795e-06	6.29375e-05	1.0409	ZFYVE27	protein_coding	1534.53	1627.52
ENSG00000100300.17	3674.89	0.127419	0.0268409	4.7472	2.06254e-06	6.39486e-05	1.09234	TSPO	protein_coding	3644.79	4103.64
ENSG00000138463.8	1025.95	0.0941451	0.0198397	4.74528	2.08217e-06	6.44949e-05	1.06743	DIRC2	protein_coding	1048.42	1159.42
ENSG00000150457.8	510.746	0.0840922	0.017728	4.74348	2.10077e-06	6.50079e-05	1.06002	LATS2	protein_coding	518.423	566.942
ENSG00000101608.12	6813.66	0.0956156	0.0201625	4.74226	2.11349e-06	6.53381e-05	1.06852	MYL12A	protein_coding	7122.86	7681.05
ENSG00000178149.16	320.36	0.0723857	0.0152668	4.74139	2.12258e-06	6.55545e-05	1.05145	DALRD3	protein_coding	330.257	354.984
ENSG00000141480.17	3143.96	0.110748	0.0233586	4.7412	2.12459e-06	6.55545e-05	1.07979	ARRB2	protein_coding	3135.87	3468.05
ENSG00000274034.1	14.8938	0.106236	0.0224096	4.74064	2.13047e-06	6.56723e-05	1.07642	MIR6813	miRNA	15.0973	16.8171
ENSG00000173214.5	899.937	-0.0542304	0.0114433	-4.73907	2.14705e-06	6.61195e-05	0.963108	MFSD4B	protein_coding	1005	977.174
ENSG00000249274.1	142.994	0.122912	0.0259377	4.73875	2.15042e-06	6.61596e-05	1.08893	PDLIM1P4	processed_pseudogene	144.002	162.905
ENSG00000170956.16	776.65	0.151252	0.0319301	4.73698	2.16922e-06	6.66737e-05	1.11053	CEACAM3	protein_coding	756.692	863.718
ENSG00000108799.12	1964.76	0.0572675	0.0121018	4.73213	2.22174e-06	6.82224e-05	1.04049	EZH1	protein_coding	2055.65	2169.66
ENSG00000090905.18	2119.21	-0.0705463	0.0149113	-4.73108	2.23333e-06	6.85123e-05	0.952277	TNRC6A	protein_coding	2390.53	2293.23
ENSG00000170634.12	247.584	-0.0562773	0.0118972	-4.73028	2.2421e-06	6.87046e-05	0.961743	ACYP2	protein_coding	270.914	263.326
ENSG00000123416.15	3257.04	0.0867832	0.018347	4.73012	2.2439e-06	6.87046e-05	1.062	TUBA1B	protein_coding	3353.37	3617.78
ENSG00000008516.16	3132.12	0.212247	0.0448802	4.72919	2.25418e-06	6.89532e-05	1.15849	MMP25	protein_coding	2928.63	3430.94
ENSG00000196154.11	9606.09	0.112037	0.0237086	4.72561	2.29429e-06	7.01132e-05	1.08075	S100A4	protein_coding	9756.44	10879.8
ENSG00000101596.15	43820.6	0.11	0.0232872	4.72361	2.31689e-06	7.07362e-05	1.07923	SMCHD1	protein_coding	45390.9	49837.8
ENSG00000176407.17	1890.83	0.0534606	0.0113184	4.72333	2.32013e-06	7.07673e-05	1.03775	KCMF1	protein_coding	1970.23	2088.71
ENSG00000110080.18	562.969	0.135617	0.0287313	4.7202	2.35615e-06	7.17975e-05	1.09856	ST3GAL4	protein_coding	565.969	634.301
ENSG00000151948.11	2204.45	0.127963	0.0271227	4.71793	2.38251e-06	7.25315e-05	1.09275	GLT1D1	protein_coding	2191.41	2489.31
ENSG00000119801.12	2808.36	0.122517	0.0259753	4.71668	2.3972e-06	7.29092e-05	1.08863	YPEL5	protein_coding	2877.25	3172.87
ENSG00000162702.7	2090.75	0.112984	0.0239553	4.71644	2.40009e-06	7.29275e-05	1.08146	ZNF281	protein_coding	2132.87	2370.71
ENSG00000261338.2	375.613	0.0600068	0.0127244	4.71588	2.40663e-06	7.30568e-05	1.04247	AC021016.2	sense_overlapping	391.007	415.42
ENSG00000139318.7	1888.18	0.110781	0.0234989	4.71433	2.42506e-06	7.35463e-05	1.07981	DUSP6	protein_coding	1917.47	2140.32
ENSG00000230735.1	107.721	-0.13375	0.0283833	-4.71229	2.44951e-06	7.42174e-05	0.911459	AC093423.2	sense_intronic	128.803	115.089
ENSG00000254477.2	94.0424	0.121149	0.0257329	4.70796	2.50213e-06	7.57397e-05	1.0876	AP000640.1	processed_transcript	93.3761	103.953
ENSG00000081237.19	60029.4	0.0932655	0.0198201	4.7056	2.53124e-06	7.65057e-05	1.06678	PTPRC	protein_coding	62888.1	67587.7
ENSG00000112159.11	2644.13	-0.0870326	0.0184959	-4.70552	2.53222e-06	7.65057e-05	0.941457	MDN1	protein_coding	3058.65	2863.56
ENSG00000172775.16	1849.78	0.0504029	0.0107125	4.70508	2.53771e-06	7.65708e-05	1.03555	FAM192A	protein_coding	1953.43	2058.36
ENSG00000254470.2	2077.5	0.14115	0.0300004	4.70496	2.53917e-06	7.65708e-05	1.10278	AP5B1	protein_coding	2010.32	2267.85
ENSG00000279475.1	13.6592	-0.107737	0.0229122	-4.70216	2.57423e-06	7.75548e-05	0.928043	AC087894.3	TEC	15.5642	14.5382
ENSG00000267565.1	23.0836	-0.139989	0.0298109	-4.6959	2.65432e-06	7.97771e-05	0.907526	AC011477.3	antisense	27.1283	24.7066
ENSG00000159445.12	364.154	-0.0930427	0.0198137	-4.69587	2.65477e-06	7.97771e-05	0.937543	THEM4	protein_coding	412.571	383.379
ENSG00000165801.9	1464.81	0.145687	0.0310249	4.69581	2.65549e-06	7.97771e-05	1.10626	ARHGEF40	protein_coding	1441.6	1635.62
ENSG00000130150.11	2113.72	0.103004	0.0219526	4.69213	2.7037e-06	8.1149e-05	1.07401	MOSPD2	protein_coding	2168.08	2380.69
ENSG00000180573.9	9442.7	0.110986	0.0236594	4.69099	2.71893e-06	8.15296e-05	1.07997	HIST1H2AC	protein_coding	9536.76	10478.9
ENSG00000110911.15	922.891	-0.0506723	0.0108095	-4.68776	2.7621e-06	8.27464e-05	0.965486	SLC11A2	protein_coding	1030.37	1003.53
ENSG00000128191.15	469.443	-0.0966793	0.0206297	-4.68641	2.78041e-06	8.32167e-05	0.935183	DGCR8	protein_coding	528.965	504.225
ENSG00000224415.1	20.2637	-0.0884841	0.0188831	-4.68588	2.78754e-06	8.33523e-05	0.94051	AC007683.1	processed_pseudogene	22.9204	21.4289
ENSG00000169299.13	1874.98	0.0914002	0.0195186	4.68273	2.83074e-06	8.45648e-05	1.0654	PGM2	protein_coding	1949.2	2127.46
ENSG00000065526.10	4775.41	0.0570434	0.0121877	4.68042	2.86283e-06	8.53399e-05	1.04033	SPEN	protein_coding	5013.21	5328.12
ENSG00000173559.12	15965.6	0.105406	0.0225212	4.68029	2.86464e-06	8.53399e-05	1.0758	NABP1	protein_coding	16581.2	18136
ENSG00000110852.4	1396.95	0.159333	0.0340435	4.68029	2.86471e-06	8.53399e-05	1.11677	CLEC2B	protein_coding	1444.09	1583.93
ENSG00000090487.10	1882.6	0.0605561	0.0129411	4.67938	2.87746e-06	8.56398e-05	1.04287	SPG21	protein_coding	1964.68	2097.48
ENSG00000069974.15	2235.77	0.0763439	0.0163161	4.67904	2.88214e-06	8.56995e-05	1.05434	RAB27A	protein_coding	2337.38	2532.54
ENSG00000254363.6	195.863	-0.108069	0.0231018	-4.67794	2.89773e-06	8.60828e-05	0.927829	AC011379.2	processed_transcript	222.018	209.104
ENSG00000104142.10	969.376	0.0866514	0.0185257	4.67736	2.90586e-06	8.6244e-05	1.0619	VPS18	protein_coding	986.009	1075.65
ENSG00000275560.1	347.335	0.121328	0.0259466	4.67606	2.9244e-06	8.67138e-05	1.08774	AC008115.3	sense_intronic	365.613	397.562
ENSG00000090432.6	409.129	0.068963	0.0147507	4.67522	2.93635e-06	8.69874e-05	1.04896	MUL1	protein_coding	425.316	454.063
ENSG00000184730.10	2730.02	0.13478	0.0288307	4.67486	2.94148e-06	8.70585e-05	1.09793	APOBR	protein_coding	2661.75	3020.4
ENSG00000259039.2	15.7362	-0.183325	0.0392277	-4.67336	2.96311e-06	8.76176e-05	0.880671	AL161804.1	antisense	18.6062	16.6816
ENSG00000117620.14	1468	-0.0532697	0.011402	-4.67196	2.98337e-06	8.8135e-05	0.96375	SLC35A3	protein_coding	1647.94	1604.13
ENSG00000240058.3	9.70114	-0.127172	0.0272231	-4.67147	2.99055e-06	8.82655e-05	0.915625	ARGFXP1	processed_pseudogene	10.9602	10.3197
ENSG00000184465.16	717.959	-0.102363	0.0219154	-4.67085	2.99961e-06	8.83894e-05	0.931506	WDR27	protein_coding	832.237	776.741
ENSG00000139505.11	2184.97	0.103805	0.0222243	4.6708	3.00028e-06	8.83894e-05	1.0746	MTMR6	protein_coding	2259.86	2483.51
ENSG00000163950.12	994.974	0.0909368	0.0194714	4.67027	3.00807e-06	8.85369e-05	1.06506	SLBP	protein_coding	1022.67	1112.76
ENSG00000181778.4	92.9022	0.186209	0.0398759	4.66973	3.01598e-06	8.86881e-05	1.13777	TMEM252	protein_coding	93.3982	106.293
ENSG00000175471.19	2505.41	0.102588	0.0219851	4.66625	3.06739e-06	9.0117e-05	1.0737	MCTP1	protein_coding	2598.96	2856.55
ENSG00000100503.23	13086.3	0.0744326	0.0159596	4.66381	3.10408e-06	9.1111e-05	1.05295	NIN	protein_coding	13715.9	14689.5
ENSG00000111817.17	2070.64	0.0992804	0.0212899	4.66326	3.11246e-06	9.12731e-05	1.07124	DSE	protein_coding	2163.84	2322.28
ENSG00000138640.14	910.997	-0.130147	0.0279134	-4.66253	3.1234e-06	9.151e-05	0.913738	FAM13A	protein_coding	1067.79	942.426
ENSG00000163597.14	1213.67	0.0593112	0.012725	4.66098	3.14703e-06	9.21178e-05	1.04197	SNHG16	processed_transcript	1293.06	1341.82
ENSG00000258768.2	60.6922	-0.144305	0.0309725	-4.65913	3.17546e-06	9.28646e-05	0.904815	AL356019.2	lincRNA	69.6637	64.8092
ENSG00000205220.11	2491.43	0.104018	0.0223324	4.65772	3.19738e-06	9.34203e-05	1.07476	PSMB10	protein_coding	2540.23	2764.58
ENSG00000158813.17	61.5559	-0.193481	0.0415431	-4.65736	3.20286e-06	9.34947e-05	0.874493	EDA	protein_coding	72.1106	63.5289
ENSG00000118518.15	1659.38	0.0857365	0.0184108	4.65685	3.21083e-06	9.36418e-05	1.06123	RNF146	protein_coding	1738.67	1871.02
ENSG00000115091.11	13935.5	0.0864514	0.0185672	4.65615	3.22183e-06	9.37959e-05	1.06176	ACTR3	protein_coding	14610.7	15722.9
ENSG00000114573.9	4211.04	0.0977126	0.0209865	4.65598	3.22449e-06	9.37959e-05	1.07008	ATP6V1A	protein_coding	4366.94	4793.04
ENSG00000121316.10	4593.18	0.131075	0.0281533	4.65577	3.22775e-06	9.37959e-05	1.09511	PLBD1	protein_coding	4540.27	5171.6
ENSG00000173757.9	4747.65	0.0936073	0.0201057	4.65576	3.22786e-06	9.37959e-05	1.06703	STAT5B	protein_coding	4879.99	5294.82
ENSG00000248521.1	27.04	-0.075864	0.0162959	-4.6554	3.23352e-06	9.38749e-05	0.948774	AC092612.1	processed_pseudogene	30.4867	28.9579
ENSG00000226975.1	26.6371	0.217373	0.0467012	4.65455	3.24683e-06	9.41757e-05	1.16261	AC006987.1	unprocessed_pseudogene	24.3186	29.2592
ENSG00000204264.9	2918.61	0.0964252	0.0207191	4.65394	3.25659e-06	9.43733e-05	1.06912	PSMB8	protein_coding	3052.72	3293.51
ENSG00000169239.12	1270.63	-0.0438571	0.00942562	-4.65297	3.27183e-06	9.47288e-05	0.970058	CA5B	protein_coding	1444.28	1349.63
ENSG00000081087.14	1833.57	0.101998	0.0219237	4.65242	3.28056e-06	9.48954e-05	1.07326	OSTM1	protein_coding	1897.95	2072.8
ENSG00000204304.11	2976.23	0.0955592	0.020545	4.65121	3.29994e-06	9.53698e-05	1.06848	PBX2	protein_coding	3036.42	3269.03
ENSG00000249859.9	372.004	-0.10011	0.0215354	-4.64863	3.34143e-06	9.64815e-05	0.932962	PVT1	lincRNA	427.015	398.155
ENSG00000224142.1	32.6996	-0.0684287	0.0147244	-4.64729	3.36329e-06	9.70251e-05	0.953676	AMMECR1-IT1	sense_intronic	37.4757	35.5395
ENSG00000161921.14	453.693	0.136566	0.0293882	4.64697	3.36849e-06	9.70872e-05	1.09929	CXCL16	protein_coding	445.281	496.158
ENSG00000070831.15	7692.12	0.12533	0.0269765	4.64587	3.38641e-06	9.75157e-05	1.09076	CDC42	protein_coding	7836.21	8642.76
ENSG00000165813.19	2363.4	0.0998018	0.0214856	4.64506	3.39976e-06	9.7812e-05	1.07163	CCDC186	protein_coding	2469.65	2665.79
ENSG00000222057.1	35.1285	0.122014	0.0262694	4.64474	3.4051e-06	9.78776e-05	1.08825	RNU4-62P	snRNA	35.5929	39.4882
ENSG00000225213.2	59.5752	-0.132323	0.0285084	-4.64154	3.45823e-06	9.92684e-05	0.912361	AC073367.1	sense_intronic	68.9535	64.0184
ENSG00000212017.2	6.59057	-0.151249	0.0325867	-4.64145	3.45971e-06	9.92684e-05	0.90047	MIR548U	miRNA	7.80531	7.04474
ENSG00000184678.10	3843.94	0.0984882	0.0212221	4.64082	3.47024e-06	9.94812e-05	1.07065	HIST2H2BE	protein_coding	3826.02	4173.59
ENSG00000274963.1	252.078	0.112621	0.0242788	4.63865	3.50693e-06	0.000100357	1.08119	RN7SL600P	misc_RNA	256.867	283.874
ENSG00000183688.4	1729.03	0.129581	0.0279352	4.63864	3.50707e-06	0.000100357	1.09398	RFLNB	protein_coding	1729.48	1947.82
ENSG00000189007.15	401.159	-0.0669603	0.0144453	-4.63543	3.56195e-06	0.000101836	0.954647	ADAT2	protein_coding	454.726	433.039
ENSG00000170296.9	2704.61	0.0983519	0.0212312	4.63243	3.61394e-06	0.000103219	1.07055	GABARAP	protein_coding	2730.07	2992.85
ENSG00000117362.12	1827.67	0.0857916	0.0185206	4.63222	3.61767e-06	0.000103219	1.06127	APH1A	protein_coding	1894.96	2040.47
ENSG00000164609.9	1570.75	0.117054	0.0252703	4.63208	3.62002e-06	0.000103219	1.08452	SLU7	protein_coding	1616.45	1774.59
ENSG00000207280.1	13.3675	-0.106474	0.0229936	-4.63061	3.64584e-06	0.000103852	0.928855	SNORD20	snoRNA	15.3761	14.5
ENSG00000147364.16	809.673	-0.0590202	0.0127461	-4.63045	3.64872e-06	0.000103852	0.959916	FBXO25	protein_coding	910.235	883.433
ENSG00000254328.1	13.9606	0.108186	0.02337	4.62924	3.67002e-06	0.000104365	1.07787	AC008429.4	processed_pseudogene	13.9757	15.5303
ENSG00000243156.7	741.517	-0.106	0.0229074	-4.62734	3.70386e-06	0.000105234	0.92916	MICAL3	protein_coding	830.336	775.284
ENSG00000212451.1	3.68944	-0.201379	0.0435328	-4.62592	3.72934e-06	0.000105863	0.869719	RNU11-4P	snRNA	4.48894	3.84474
ENSG00000237852.1	9.65561	-0.124955	0.0270143	-4.62552	3.73668e-06	0.000105884	0.917033	AC119800.1	sense_intronic	11.1394	10.4487
ENSG00000105058.11	1446.99	0.0956298	0.0206744	4.62551	3.7367e-06	0.000105884	1.06853	FAM32A	protein_coding	1490.64	1620.61
ENSG00000083444.16	644.864	0.112426	0.024308	4.62506	3.74486e-06	0.000106021	1.08104	PLOD1	protein_coding	634.17	720.797
ENSG00000149357.9	1614.26	0.0855834	0.0185052	4.62483	3.74911e-06	0.000106048	1.06112	LAMTOR1	protein_coding	1640.35	1780.59
ENSG00000225298.5	57.3567	-0.108069	0.0233773	-4.62282	3.78566e-06	0.00010697	0.927829	LINC00113	lincRNA	65.0066	60.4842
ENSG00000110713.16	5696	0.0695002	0.0150347	4.62267	3.78841e-06	0.00010697	1.04935	NUP98	protein_coding	5895.27	6329.51
ENSG00000226989.1	18.1894	0.0937963	0.0202972	4.62115	3.81619e-06	0.000107649	1.06717	AL049758.1	processed_pseudogene	18.5442	20.3118
ENSG00000204713.10	2202.44	0.0582934	0.0126149	4.62099	3.81921e-06	0.000107649	1.04123	TRIM27	protein_coding	2304.8	2441.66
ENSG00000272334.1	15.1604	-0.0996246	0.0215674	-4.61922	3.85189e-06	0.000108475	0.933276	AC011816.2	lincRNA	17.3584	16.5368
ENSG00000279082.3	39.4031	-0.176081	0.0381269	-4.61828	3.86942e-06	0.000108872	0.885104	LINC01727	lincRNA	46.7832	41.2658
ENSG00000135211.5	269.719	0.0989942	0.0214384	4.6176	3.88197e-06	0.000109129	1.07103	TMEM60	protein_coding	284.086	304.709
ENSG00000232520.1	55.0441	-0.100948	0.0218669	-4.61647	3.90321e-06	0.00010963	0.93242	AC012507.2	antisense	61.9602	58.7
ENSG00000172216.5	4861.28	0.115146	0.0249541	4.61432	3.94379e-06	0.000110672	1.08308	CEBPB	protein_coding	4799.48	5369.48
ENSG00000166272.17	1643.87	0.057824	0.0125322	4.61402	3.94961e-06	0.000110738	1.04089	WBP1L	protein_coding	1711.5	1819.62
ENSG00000177352.9	391.013	0.066767	0.0144714	4.61373	3.95505e-06	0.000110793	1.04737	CCDC71	protein_coding	405.369	429.579
ENSG00000214439.4	205.896	0.0974727	0.0211285	4.61333	3.96268e-06	0.00011091	1.0699	FAM185BP	transcribed_unprocessed_pseudogene	211.164	231.028
ENSG00000198053.11	1937.69	0.129693	0.0281165	4.6127	3.97471e-06	0.000111149	1.09406	SIRPA	protein_coding	1938.04	2183.73
ENSG00000173638.18	1488.51	0.143892	0.0312064	4.61097	4.00795e-06	0.000111835	1.10488	SLC19A1	protein_coding	1467.18	1649.62
ENSG00000261556.9	496.156	-0.0801204	0.0173762	-4.61092	4.00885e-06	0.000111835	0.945979	SMG1P7	transcribed_unprocessed_pseudogene	558.051	534.855
ENSG00000069020.18	435.646	-0.0898703	0.0194917	-4.6107	4.01317e-06	0.000111835	0.939607	MAST4	protein_coding	492.055	456.026
ENSG00000239856.3	6.15672	-0.161287	0.0349811	-4.6107	4.01323e-06	0.000111835	0.894227	RN7SL225P	misc_RNA	6.75442	6.06184
ENSG00000220323.4	514.674	0.0941886	0.0204372	4.60869	4.05213e-06	0.00011282	1.06746	HIST2H2BD	transcribed_unprocessed_pseudogene	534.204	585.282
ENSG00000180139.11	175.518	-0.110275	0.0239471	-4.60495	4.1257e-06	0.000114768	0.926411	ACTA2-AS1	antisense	203.261	187.801
ENSG00000172795.15	8556.05	0.0953056	0.0206993	4.60429	4.13866e-06	0.000114872	1.06829	DCP2	protein_coding	8928.54	9682.65
ENSG00000067082.14	6606.68	0.073059	0.0158678	4.60422	4.14005e-06	0.000114872	1.05194	KLF6	protein_coding	6965.27	7485.89
ENSG00000280206.1	213.439	0.0814537	0.0176911	4.60422	4.14022e-06	0.000114872	1.05808	AC026401.3	lincRNA	219.655	237.339
ENSG00000175213.2	208.385	0.065768	0.0142881	4.60298	4.16492e-06	0.000115457	1.04664	ZNF408	protein_coding	216.719	230.33
ENSG00000236184.1	34.9617	-0.108917	0.0236752	-4.60046	4.21569e-06	0.000116763	0.927284	TCEA1P4	processed_pseudogene	39.7987	37.4737
ENSG00000267796.7	182.729	0.0744233	0.0161824	4.59902	4.24479e-06	0.000117467	1.05294	LIN37	protein_coding	188.546	201.899
ENSG00000119820.10	4155	0.0607857	0.0132191	4.59832	4.25916e-06	0.000117763	1.04303	YIPF4	protein_coding	4368.69	4627.08
ENSG00000196411.9	208.527	0.169794	0.0369284	4.59794	4.26695e-06	0.000117876	1.1249	EPHB4	protein_coding	197.471	231.342
ENSG00000132570.14	410.587	-0.052495	0.0114182	-4.5975	4.27588e-06	0.000118021	0.964267	PCBD2	protein_coding	452.343	443.359
ENSG00000126262.4	2361.43	0.139655	0.0303859	4.59607	4.30543e-06	0.000118734	1.10164	FFAR2	protein_coding	2431.43	2671.84
ENSG00000204370.10	1719.81	0.0778176	0.0169389	4.59403	4.34768e-06	0.000119796	1.05542	SDHD	protein_coding	1814.71	1943.29
ENSG00000277496.1	282.268	0.091816	0.019988	4.59357	4.35733e-06	0.000119958	1.06571	AL357033.4	antisense	292.038	315.228
ENSG00000185862.6	3101.28	0.110384	0.0240451	4.59071	4.4175e-06	0.00012151	1.07952	EVI2B	protein_coding	3032.46	3346.79
ENSG00000284707.1	234.351	-0.0880687	0.0191875	-4.5899	4.43462e-06	0.000121876	0.940781	AC079781.5	processed_transcript	262.595	250.039
ENSG00000139496.15	2965.1	0.0796166	0.0173541	4.58776	4.48031e-06	0.000123025	1.05674	NUP58	protein_coding	3112.63	3358.73
ENSG00000135655.15	17817.8	0.112212	0.0244619	4.58722	4.49194e-06	0.00012318	1.08088	USP15	protein_coding	18361.2	20151.1
ENSG00000137207.11	310.824	0.110439	0.0240758	4.58714	4.49365e-06	0.00012318	1.07956	YIPF3	protein_coding	310.352	346.043
ENSG00000129071.9	1573.17	0.0804887	0.0175483	4.58671	4.50294e-06	0.000123329	1.05738	MBD4	protein_coding	1650.61	1768.19
ENSG00000201441.1	17.5646	0.170401	0.0371601	4.5856	4.5269e-06	0.000123879	1.12537	RNU6-646P	snRNA	17.3783	20.2408
ENSG00000142867.13	1063.9	0.0710132	0.0154907	4.58425	4.55621e-06	0.00012454	1.05045	BCL10	protein_coding	1109.83	1185.58
ENSG00000124659.6	1371.86	0.0857064	0.0186967	4.58403	4.56106e-06	0.00012454	1.06121	TBCC	protein_coding	1413.1	1532.31
ENSG00000133943.20	3700.41	0.0932787	0.020349	4.58395	4.56276e-06	0.00012454	1.06679	DGLUCY	protein_coding	3783.44	4119.04
ENSG00000092036.18	955.104	0.12806	0.0279399	4.58341	4.57461e-06	0.000124757	1.09282	HAUS4	protein_coding	968.777	1076.61
ENSG00000262370.5	362.654	0.126715	0.0276491	4.58299	4.58369e-06	0.000124794	1.09181	AC108134.3	lincRNA	362.737	416.788
ENSG00000149925.18	2750.1	0.0980143	0.021387	4.58288	4.58618e-06	0.000124794	1.0703	ALDOA	protein_coding	2776.47	3014.35
ENSG00000118058.21	4153	-0.0859166	0.0187476	-4.58281	4.5877e-06	0.000124794	0.942186	KMT2A	protein_coding	4700.41	4443.85
ENSG00000120029.12	710.271	-0.0528992	0.0115462	-4.58151	4.61635e-06	0.000125466	0.963997	ARMH3	protein_coding	790.153	772.955
ENSG00000154743.17	430.433	-0.0549761	0.0120092	-4.57783	4.69829e-06	0.000127585	0.96261	TSEN2	protein_coding	479.146	461.924
ENSG00000269194.1	47.2623	0.14383	0.0314267	4.57668	4.72419e-06	0.000128179	1.10483	AC006942.1	antisense	45.2345	51.8658
ENSG00000185627.17	1479.45	0.0727846	0.0159102	4.57472	4.76868e-06	0.000129276	1.05174	PSMD13	protein_coding	1552.95	1657.97
ENSG00000130429.14	8686.08	0.0867324	0.0189767	4.57046	4.86661e-06	0.00013182	1.06196	ARPC1B	protein_coding	8850.12	9618.72
ENSG00000105404.10	553.604	0.0957429	0.0209784	4.56388	5.02179e-06	0.000135908	1.06862	RABAC1	protein_coding	561.4	612.947
ENSG00000143367.15	140.555	0.108731	0.0238258	4.56356	5.02939e-06	0.000135915	1.07828	TUFT1	protein_coding	145.951	156.389
ENSG00000146872.17	2614.29	0.0432656	0.00948078	4.56351	5.0306e-06	0.000135915	1.03044	TLK2	protein_coding	2748.32	2889.01
ENSG00000155465.18	2207.47	0.0976898	0.021412	4.56237	5.05783e-06	0.000136536	1.07006	SLC7A7	protein_coding	2252.91	2495.8
ENSG00000196470.11	680.938	0.0624873	0.0137013	4.5607	5.09832e-06	0.000137512	1.04426	SIAH1	protein_coding	712.602	759.13
ENSG00000228106.5	88.9269	-0.0890286	0.0195222	-4.56037	5.10627e-06	0.000137611	0.940156	AL392172.1	lincRNA	101.327	96.1947
ENSG00000162819.11	2402.49	0.0818272	0.0179502	4.55857	5.15027e-06	0.00013868	1.05836	BROX	protein_coding	2503.79	2688.43
ENSG00000254165.1	41.2554	-0.10464	0.0229556	-4.55837	5.15521e-06	0.000138695	0.930037	AC090739.1	antisense	47.4558	44.0553
ENSG00000230870.2	3.65704	-0.20262	0.0444584	-4.55753	5.17591e-06	0.00013908	0.868971	FBXW11P1	processed_pseudogene	4.22345	3.74342
ENSG00000161011.19	4719.88	0.0900346	0.0197556	4.55744	5.1782e-06	0.00013908	1.0644	SQSTM1	protein_coding	4781.25	5142.69
ENSG00000157193.16	271.742	-0.064298	0.014112	-4.55625	5.20753e-06	0.00013975	0.956411	LRP8	protein_coding	302.259	294.742
ENSG00000179562.2	1581.39	0.0779837	0.0171169	4.55595	5.21481e-06	0.000139828	1.05554	GCC1	protein_coding	1639.52	1763.63
ENSG00000175073.7	5602.2	0.0947951	0.0208092	4.55544	5.22749e-06	0.000139952	1.06791	VCPIP1	protein_coding	5856.94	6295.64
ENSG00000101336.13	11801.7	0.111551	0.0244877	4.55542	5.2282e-06	0.000139952	1.08039	HCK	protein_coding	11852.6	13072.7
ENSG00000151327.12	606.723	0.055781	0.0122459	4.55506	5.23697e-06	0.000140069	1.03942	FAM177A1	protein_coding	627.476	666.851
ENSG00000129450.8	1368.62	0.105999	0.0232769	4.55384	5.26765e-06	0.000140772	1.07624	SIGLEC9	protein_coding	1369.04	1512.09
ENSG00000198060.9	545.73	0.0565574	0.0124211	4.55332	5.28067e-06	0.000141002	1.03998	2022-03-05	protein_coding	579.588	612.062
ENSG00000252577.1	51.5423	0.119934	0.0263447	4.55249	5.30135e-06	0.000141413	1.08669	SCARNA20	scaRNA	52.9558	59.3105
ENSG00000100034.13	3526.16	0.1158	0.0254374	4.55235	5.30493e-06	0.000141413	1.08358	PPM1F	protein_coding	3516.67	3948.22
ENSG00000142634.12	3393.53	0.102402	0.0225003	4.55112	5.33619e-06	0.000142128	1.07356	EFHD2	protein_coding	3396.97	3724.97
ENSG00000181631.6	1187.35	0.121096	0.0266104	4.55071	5.34647e-06	0.000142283	1.08756	P2RY13	protein_coding	1206.02	1356.87
ENSG00000139890.9	235.489	0.136871	0.0300819	4.54993	5.36646e-06	0.000142696	1.09952	REM2	protein_coding	236.872	263.346
ENSG00000222414.1	11.2776	-0.115542	0.0254209	-4.54517	5.48903e-06	0.000145834	0.923035	RNU2-59P	snRNA	12.7168	11.725
ENSG00000254791.1	41.9648	0.121556	0.0267603	4.54239	5.56187e-06	0.000147646	1.08791	FAR1-IT1	sense_intronic	40.781	45.4487
ENSG00000115762.16	3264.49	0.0648871	0.0142862	4.54195	5.5736e-06	0.000147835	1.046	PLEKHB2	protein_coding	3438.8	3659.79
ENSG00000071537.13	4197.01	0.0673822	0.0148369	4.54154	5.58458e-06	0.000148003	1.04781	SEL1L	protein_coding	4429.76	4716.42
ENSG00000278869.1	150.181	0.166125	0.0365819	4.54119	5.59376e-06	0.000148123	1.12204	BX539320.1	lincRNA	147.246	167.197
ENSG00000108479.11	318.333	0.106723	0.0235209	4.53735	5.69643e-06	0.000150717	1.07678	GALK1	protein_coding	320.128	351.807
ENSG00000111669.14	2965.01	0.0874628	0.019277	4.53716	5.7018e-06	0.000150734	1.0625	TPI1	protein_coding	3076.59	3346.81
ENSG00000175197.12	338.488	0.117937	0.026001	4.53588	5.73648e-06	0.000151526	1.08518	DDIT3	protein_coding	342.241	385.233
ENSG00000259287.2	7.95485	-0.136197	0.0300319	-4.53507	5.75833e-06	0.000151977	0.909915	AC010809.1	antisense	9.11504	8.39342
ENSG00000176788.8	6546.87	0.156077	0.0344272	4.53354	5.80032e-06	0.000152959	1.11425	BASP1	protein_coding	6399.22	7197.83
ENSG00000111897.6	6623.21	0.126184	0.0278429	4.532	5.84277e-06	0.000153951	1.0914	SERINC1	protein_coding	6816.23	7488.67
ENSG00000138674.16	1574.93	-0.0533306	0.0117709	-4.53071	5.87868e-06	0.00015477	0.963709	SEC31A	protein_coding	1762.39	1719.87
ENSG00000257156.1	30.3937	0.275291	0.0607743	4.52973	5.90604e-06	0.000155362	1.21024	AC024909.1	lincRNA	30.0133	35.5026
ENSG00000121552.3	696.856	0.200976	0.0443706	4.52948	5.9128e-06	0.000155412	1.14948	CSTA	protein_coding	691.836	809.15
ENSG00000215301.10	17713.8	0.0827043	0.018263	4.52851	5.94004e-06	0.000155999	1.059	DDX3X	protein_coding	19071.3	19656.8
ENSG00000221025.1	10.1398	0.227104	0.0501577	4.5278	5.96006e-06	0.000156396	1.17048	MIR1250	miRNA	9.34071	11.35
ENSG00000161904.11	2011.29	0.0488964	0.0108069	4.52457	6.05187e-06	0.000158675	1.03447	LEMD2	protein_coding	2114.34	2222.06
ENSG00000155957.17	2807.84	0.0777604	0.0171892	4.52378	6.07449e-06	0.000159138	1.05538	TMBIM4	protein_coding	2937.25	3157.29
ENSG00000166949.15	1253	-0.0999777	0.0221068	-4.52249	6.11153e-06	0.000159977	0.933047	SMAD3	protein_coding	1442.71	1345.4
ENSG00000225761.1	20.183	-0.0865886	0.0191529	-4.52091	6.15744e-06	0.000161047	0.941747	AL596247.1	sense_intronic	21.7677	21.2592
ENSG00000182220.14	2761.7	0.0895999	0.01982	4.52068	6.16414e-06	0.00016109	1.06408	ATP6AP2	protein_coding	2883.28	3115.06
ENSG00000119640.8	137.556	-0.0879039	0.0194472	-4.52014	6.17997e-06	0.000161372	0.940889	ACYP1	protein_coding	159.389	149.893
ENSG00000237765.6	855.221	0.115073	0.0254735	4.51736	6.26158e-06	0.000163369	1.08303	FAM200B	protein_coding	880.146	966.203
ENSG00000131263.12	4545.07	0.0823868	0.0182394	4.51697	6.27319e-06	0.000163538	1.05877	RLIM	protein_coding	4795.58	5089.3
ENSG00000101901.11	1470.89	-0.0819375	0.0181536	-4.51357	6.37445e-06	0.000166043	0.944788	ALG13	protein_coding	1725.24	1585.74
ENSG00000111640.14	11262.8	0.096927	0.0214774	4.51298	6.39223e-06	0.00016637	1.06949	GAPDH	protein_coding	11355	12455.7
ENSG00000116138.12	606.989	-0.0418742	0.00927926	-4.51266	6.4019e-06	0.0001664	0.971392	DNAJC16	protein_coding	664.292	652.399
ENSG00000178104.19	2117.75	-0.0672458	0.0149018	-4.5126	6.40379e-06	0.0001664	0.954458	PDE4DIP	protein_coding	2371.17	2246.25
ENSG00000200731.1	25.377	-0.0754104	0.0167121	-4.51232	6.41217e-06	0.000166482	0.949072	RNU1-124P	snRNA	28.8783	27.6171
ENSG00000237296.9	5618.8	-0.112247	0.0248779	-4.51194	6.42379e-06	0.000166648	0.925146	SMG1P1	transcribed_unprocessed_pseudogene	6466.52	6109.84
ENSG00000235193.1	52.5658	0.171717	0.0380621	4.51149	6.43734e-06	0.000166864	1.1264	AC006987.2	unprocessed_pseudogene	50.3739	57.9395
ENSG00000076685.18	4645.64	0.0856502	0.0189874	4.5109	6.45521e-06	0.000167191	1.06117	NT5C2	protein_coding	4803.9	5249.77
ENSG00000183621.15	784.269	0.109964	0.0243894	4.5087	6.5226e-06	0.0001688	1.0792	ZNF438	protein_coding	802.465	873.717
ENSG00000137266.14	217.373	-0.184543	0.0409356	-4.50814	6.53985e-06	0.000169109	0.879928	SLC22A23	protein_coding	229.381	205.862
ENSG00000157540.20	9499.19	0.0462726	0.0102647	4.50794	6.5459e-06	0.000169129	1.03259	DYRK1A	protein_coding	10048.4	10535.9
ENSG00000018280.16	5956.78	0.13743	0.0304949	4.50664	6.58616e-06	0.000170032	1.09994	SLC11A1	protein_coding	5768.2	6667.74
ENSG00000132906.17	386.153	0.0714496	0.0158556	4.50627	6.59756e-06	0.000170188	1.05077	CASP9	protein_coding	395.527	425.67
ENSG00000182022.17	9127.21	0.116091	0.0257645	4.50584	6.61114e-06	0.000170401	1.08379	CHST15	protein_coding	9062.49	10320.9
ENSG00000259330.2	1268.06	0.100549	0.0223164	4.50559	6.61894e-06	0.000170464	1.07218	INAFM2	protein_coding	1296.39	1410.49
ENSG00000270640.1	71.3539	0.123104	0.0273238	4.50535	6.6263e-06	0.000170516	1.08908	AC104695.3	sense_intronic	72.6637	81.5013
ENSG00000008130.15	5572.72	0.115624	0.0256695	4.50433	6.65839e-06	0.000171204	1.08344	NADK	protein_coding	5561.76	6208.35
ENSG00000204389.9	4596.08	0.150075	0.033334	4.50216	6.72653e-06	0.000172817	1.10963	HSPA1A	protein_coding	4476.33	5122
ENSG00000238005.2	132.508	0.145367	0.0322928	4.50153	6.74675e-06	0.000173197	1.10601	AL391832.2	lincRNA	131.102	150.18
ENSG00000151414.14	3959.98	0.111278	0.0247219	4.50121	6.75691e-06	0.000173237	1.08018	NEK7	protein_coding	4098.46	4495.23
ENSG00000135083.15	1105.17	0.146429	0.0325316	4.50113	6.75916e-06	0.000173237	1.10683	CCNJL	protein_coding	1090.88	1248.2
ENSG00000106245.10	612.406	0.0882409	0.0196077	4.50032	6.78504e-06	0.000173761	1.06307	BUD31	protein_coding	630.896	682.792
ENSG00000005812.10	2990.24	0.0913239	0.0202964	4.49951	6.81111e-06	0.000174289	1.06535	FBXL3	protein_coding	3129.69	3359.27
ENSG00000138434.16	2910.28	0.0806651	0.017933	4.49813	6.85553e-06	0.000175285	1.05751	ITPRID2	protein_coding	3040.52	3267.41
ENSG00000214455.4	13.8925	-0.103195	0.0229497	-4.49657	6.90581e-06	0.00017643	0.930969	RCN1P2	processed_pseudogene	15.4558	14.4934
ENSG00000171044.10	214.04	-0.101161	0.0224987	-4.49631	6.91414e-06	0.000176501	0.932282	XKR6	protein_coding	247.19	231.086
ENSG00000177963.14	1646.51	0.0749117	0.0166625	4.49582	6.93036e-06	0.000176774	1.0533	RIC8A	protein_coding	1699.5	1822.84
ENSG00000166128.12	5282.65	0.118348	0.0263286	4.49503	6.95604e-06	0.000177287	1.08549	RAB8B	protein_coding	5474.05	5998.38
ENSG00000230492.1	53.2994	0.141764	0.0315393	4.49483	6.96239e-06	0.000177308	1.10325	AL049651.1	antisense	54.4624	60.8539
ENSG00000163492.15	716.43	-0.124068	0.0276043	-4.4945	6.9733e-06	0.000177414	0.917597	CCDC141	protein_coding	843.748	762.233
ENSG00000182511.11	2351.56	0.121443	0.0270211	4.49437	6.97769e-06	0.000177414	1.08782	FES	protein_coding	2339.98	2614.62
ENSG00000163739.4	77.2715	0.166925	0.0371521	4.49301	7.02225e-06	0.000178405	1.12266	CXCL1	protein_coding	74.1571	87.2816
ENSG00000166579.15	4792	0.0930429	0.0207101	4.49263	7.03473e-06	0.00017858	1.06662	NDEL1	protein_coding	4903.95	5407.59
ENSG00000130475.14	706.717	0.0892601	0.0198695	4.49233	7.04493e-06	0.000178697	1.06382	FCHO1	protein_coding	715.223	777.25
ENSG00000112406.4	4626.32	0.0663587	0.0147775	4.49052	7.10486e-06	0.000180074	1.04707	HECA	protein_coding	4872.4	5158.82
ENSG00000180953.11	675.47	0.114662	0.0255494	4.48784	7.195e-06	0.000182214	1.08272	ST20	protein_coding	692.294	774.779
ENSG00000185669.5	167.806	0.105145	0.0234337	4.48691	7.22649e-06	0.000182867	1.0756	SNAI3	protein_coding	165.292	184.753
ENSG00000185950.8	1419.08	0.125291	0.0279271	4.48636	7.24519e-06	0.000183195	1.09073	IRS2	protein_coding	1382.82	1571.92
ENSG00000219487.2	5.68248	-0.274872	0.0612867	-4.48502	7.29067e-06	0.000184158	0.826524	AL603766.1	processed_pseudogene	7.10841	5.63026
ENSG00000160075.11	1726.63	0.0492316	0.0109772	4.4849	7.29481e-06	0.000184158	1.03471	SSU72	protein_coding	1797.23	1887.58
ENSG00000102172.15	758.652	0.0972232	0.0216882	4.48277	7.36791e-06	0.000185856	1.06971	SMS	protein_coding	790.993	856.611
ENSG00000168894.9	521.647	0.0920954	0.0205504	4.48144	7.41413e-06	0.000186875	1.06592	RNF181	protein_coding	539.487	589.525
ENSG00000144161.12	488.54	-0.0538247	0.0120118	-4.48098	7.4302e-06	0.000187132	0.963379	ZC3H8	protein_coding	546.272	526.422
ENSG00000049883.14	335.623	-0.0630584	0.0140733	-4.4807	7.43982e-06	0.000187227	0.957233	PTCD2	protein_coding	377.265	361.607
ENSG00000124126.13	13990.2	0.11222	0.0250482	4.48014	7.45926e-06	0.000187568	1.08089	PREX1	protein_coding	14066.2	15580.9
ENSG00000102978.12	810.589	0.0621001	0.0138642	4.47918	7.49307e-06	0.00018827	1.04398	POLR2C	protein_coding	854.757	905.557
ENSG00000264322.2	41.9884	0.119001	0.0265747	4.47799	7.53475e-06	0.000189168	1.08598	RN7SL448P	misc_RNA	42.4336	47.4184
ENSG00000172183.14	2271.5	0.106857	0.0238714	4.47636	7.59279e-06	0.000190375	1.07688	ISG20	protein_coding	2313.07	2511.79
ENSG00000280190.1	30.8917	-0.217045	0.0484877	-4.4763	7.59474e-06	0.000190375	0.860326	AC027279.4	TEC	37.3252	33.1092
ENSG00000266910.2	43.3722	-0.135061	0.0301786	-4.47538	7.62761e-06	0.000191049	0.910632	AC008507.1	processed_pseudogene	50.6482	46.2618
ENSG00000112062.10	9129.3	0.0971976	0.0217257	4.47385	7.6825e-06	0.000192273	1.06969	MAPK14	protein_coding	9348.58	10328.7
ENSG00000265282.1	4.27426	-0.186555	0.0417114	-4.47252	7.73018e-06	0.000193315	0.878701	AC005828.4	lincRNA	4.81637	4.24079
ENSG00000066294.14	2463.42	-0.0727998	0.016281	-4.47145	7.769e-06	0.000194079	0.950791	CD84	protein_coding	2780.9	2654.73
ENSG00000114770.16	2137.26	0.0930961	0.0208206	4.47135	7.77288e-06	0.000194079	1.06666	ABCC5	protein_coding	2215.55	2415.46
ENSG00000092010.14	4614.09	0.0985842	0.0220501	4.47092	7.78855e-06	0.000194318	1.07072	PSME1	protein_coding	4797.35	5187.84
ENSG00000135749.18	1352.9	-0.0799962	0.0178935	-4.47069	7.79684e-06	0.000194373	0.94606	PCNX2	protein_coding	1537.58	1448.79
ENSG00000168556.6	106.545	0.099563	0.0222768	4.46935	7.84567e-06	0.000195438	1.07145	ING2	protein_coding	109.283	118.457
ENSG00000011009.10	301.76	0.0756231	0.0169254	4.46803	7.89422e-06	0.000196494	1.05382	LYPLA2	protein_coding	308.949	332.513
ENSG00000224934.4	234.332	-0.106425	0.0238222	-4.46749	7.91413e-06	0.000196836	0.928887	AL391684.1	bidirectional_promoter_lncRNA	262.263	249.358
ENSG00000164327.12	10069	0.0935592	0.0209435	4.46721	7.92452e-06	0.000196845	1.067	RICTOR	protein_coding	10578.7	11413.5
ENSG00000174744.13	638.809	0.0959948	0.0214891	4.46715	7.92679e-06	0.000196845	1.0688	BRMS1	protein_coding	651.792	711.475
ENSG00000220392.1	9.83901	-0.120756	0.0270381	-4.46613	7.96483e-06	0.000197635	0.919706	FCF1P5	processed_pseudogene	11.2456	10.2974
ENSG00000169217.8	1241.02	0.0676954	0.0151587	4.46578	7.97777e-06	0.000197803	1.04804	CD2BP2	protein_coding	1299.54	1392.9
ENSG00000249921.2	8.53781	-0.128122	0.028698	-4.46449	8.02592e-06	0.000198842	0.915022	AC034207.1	processed_pseudogene	9.88717	9.27105
ENSG00000120051.14	122.205	0.144521	0.0323745	4.46405	8.04254e-06	0.0001991	1.10536	CFAP58	protein_coding	124.566	138.978
ENSG00000261716.2	1445.06	0.0826983	0.0185268	4.46371	8.0554e-06	0.000199263	1.059	HIST2H2BC	transcribed_unprocessed_pseudogene	1495.22	1628.41
ENSG00000189283.9	393.694	-0.154519	0.0346247	-4.46269	8.0938e-06	0.000200059	0.898432	FHIT	protein_coding	471.153	409.978
ENSG00000103154.9	28.8833	0.231696	0.0519555	4.45951	8.21472e-06	0.00020289	1.17421	NECAB2	protein_coding	26.1991	32.2934
ENSG00000073921.17	15807.6	0.0884474	0.019845	4.45692	8.31464e-06	0.000205199	1.06323	PICALM	protein_coding	16330.7	17850.7
ENSG00000160703.15	256.922	0.110555	0.0248118	4.45573	8.36067e-06	0.000206176	1.07964	NLRX1	protein_coding	255.192	284.189
ENSG00000138190.16	1325.1	0.1021	0.0229166	4.45529	8.37811e-06	0.000206447	1.07333	EXOC6	protein_coding	1368.05	1488.67
ENSG00000141582.14	414.636	0.0704418	0.0158153	4.45402	8.42771e-06	0.000207509	1.05004	CBX4	protein_coding	419.482	449.308
ENSG00000135392.16	1000.33	0.0650286	0.0146033	4.45301	8.46766e-06	0.000208332	1.04611	DNAJC14	protein_coding	1052.66	1114.08
ENSG00000085063.15	2075.94	0.09154	0.0205667	4.45088	8.55182e-06	0.00021024	1.06551	CD59	protein_coding	2168.19	2310.37
ENSG00000047849.21	910.23	-0.0903253	0.0203036	-4.44873	8.63776e-06	0.00021219	0.939311	MAP4	protein_coding	1027.75	984.199
ENSG00000272542.1	16.7896	-0.0913279	0.0205304	-4.44842	8.65055e-06	0.000212341	0.938658	AL137246.1	lincRNA	19.2058	18.1184
ENSG00000119509.12	685.849	-0.0576673	0.0129649	-4.44796	8.66909e-06	0.000212633	0.960816	INVS	protein_coding	768.65	745.284
ENSG00000147576.16	162.768	-0.0959393	0.0215721	-4.44739	8.69203e-06	0.000213031	0.935663	ADHFE1	protein_coding	182.907	175.366
ENSG00000184209.14	653.167	0.040214	0.00904535	4.44582	8.75555e-06	0.000214424	1.02827	SNRNP35	protein_coding	688.931	720.754
ENSG00000021355.12	3329.91	0.0984451	0.0221465	4.44517	8.78211e-06	0.000214752	1.07062	SERPINB1	protein_coding	3425.11	3742.62
ENSG00000166912.16	3940.82	0.0708558	0.01594	4.44517	8.7824e-06	0.000214752	1.05034	MTMR10	protein_coding	4121.19	4442.29
ENSG00000140332.15	4083.63	0.116221	0.0261523	4.44401	8.82988e-06	0.000215748	1.08389	TLE3	protein_coding	4101.56	4544.85
ENSG00000049860.13	1232.58	0.0831018	0.0187015	4.4436	8.84655e-06	0.00021599	1.05929	HEXB	protein_coding	1279.54	1386.52
ENSG00000118420.16	306.915	-0.0691361	0.0155594	-4.44336	8.85642e-06	0.000216066	0.953209	UBE3D	protein_coding	350.195	330.821
ENSG00000148187.17	495.71	-0.0460252	0.0103634	-4.44114	8.9484e-06	0.000218023	0.968601	MRRF	protein_coding	550.414	536.363
ENSG00000100485.11	3702.37	0.0917882	0.0206679	4.44109	8.9503e-06	0.000218023	1.06569	SOS2	protein_coding	3818.94	4201.89
ENSG00000255398.2	523.583	0.177954	0.0400809	4.43987	9.00127e-06	0.000219097	1.13128	HCAR3	protein_coding	558.719	592.293
ENSG00000100644.16	3891.82	0.103915	0.0234065	4.43956	9.01446e-06	0.000219105	1.07469	HIF1A	protein_coding	3971.45	4353.5
ENSG00000243738.3	21.9959	-0.0813485	0.0183237	-4.43954	9.01532e-06	0.000219105	0.945174	RN7SL181P	misc_RNA	24.0133	23.1711
ENSG00000259080.1	69.3817	-0.151018	0.0340313	-4.43763	9.09558e-06	0.000220888	0.900615	AC074091.1	processed_transcript	80.4558	74.2382
ENSG00000114021.11	585.104	-0.0547781	0.0123466	-4.4367	9.13467e-06	0.000221669	0.962742	NIT2	protein_coding	654.688	633.161
ENSG00000136161.12	2317.33	0.0770794	0.0173776	4.43557	9.18284e-06	0.000222668	1.05488	RCBTB2	protein_coding	2425.37	2629.17
ENSG00000278472.1	6.4006	-0.147109	0.0331769	-4.43408	9.24641e-06	0.000224018	0.903058	AC009268.2	sense_intronic	7.48894	6.83553
ENSG00000146425.10	1398.62	0.0922031	0.0207949	4.43393	9.25289e-06	0.000224018	1.066	DYNLT1	protein_coding	1462.25	1583.4
ENSG00000143363.16	560.521	0.0665068	0.015	4.43378	9.25956e-06	0.000224018	1.04718	PRUNE1	protein_coding	582.002	604.629
ENSG00000100764.13	763.397	0.0743954	0.0167809	4.43333	9.27897e-06	0.000224318	1.05292	PSMC1	protein_coding	804.535	859.58
ENSG00000273270.1	693.581	0.0541649	0.0122192	4.43276	9.3036e-06	0.000224743	1.03826	AC090114.2	lincRNA	719.051	763.125
ENSG00000130066.16	8439.48	0.118713	0.0267861	4.43188	9.34161e-06	0.000225491	1.08577	SAT1	protein_coding	8621.2	9646.77
ENSG00000164088.17	1399.29	0.069922	0.0157782	4.43157	9.35508e-06	0.000225645	1.04966	PPM1M	protein_coding	1448.86	1562.43
ENSG00000165782.10	744.757	0.046413	0.010474	4.43127	9.36793e-06	0.000225785	1.03269	PIP4P1	protein_coding	795.657	832.595
ENSG00000165275.9	291.565	-0.0633326	0.0142955	-4.43023	9.41323e-06	0.000226705	0.957051	TRMT10B	protein_coding	319.354	310.443
ENSG00000259562.2	70.8059	-0.0794079	0.0179268	-4.42957	9.442e-06	0.000227127	0.946446	AC090607.2	transcribed_processed_pseudogene	79.8673	76.2579
ENSG00000197822.10	231.693	-0.173587	0.0391888	-4.42951	9.44494e-06	0.000227127	0.886636	OCLN	protein_coding	271.9	245.811
ENSG00000236928.3	13.9538	-0.101109	0.0228275	-4.42926	9.4555e-06	0.000227209	0.932316	AC008267.4	processed_pseudogene	15.4779	14.8579
ENSG00000138386.16	1557.43	0.0891459	0.0201317	4.42813	9.50543e-06	0.000228237	1.06374	NAB1	protein_coding	1636.79	1750.91
ENSG00000182885.16	1077.18	0.170241	0.0384509	4.42748	9.53401e-06	0.000228752	1.12525	ADGRG3	protein_coding	1017.04	1200.99
ENSG00000228395.1	31.7543	-0.067598	0.0152731	-4.42594	9.60211e-06	0.000230213	0.954225	AL356481.1	antisense	34.3009	33.2329
ENSG00000260563.3	84.2403	0.0922034	0.0208339	4.42565	9.61537e-06	0.000230358	1.066	AC132872.1	lincRNA	85.635	93.2408
ENSG00000276445.1	11.9544	-0.108078	0.0244251	-4.42487	9.65023e-06	0.000231019	0.927823	AC005393.1	lincRNA	13.6482	12.7921
ENSG00000247400.3	189.329	0.149198	0.0337449	4.42135	9.80882e-06	0.000234567	1.10895	DNAJC3-DT	lincRNA	191.126	215.116
ENSG00000284688.1	5.6877	0.163206	0.0369144	4.42121	9.81512e-06	0.000234567	1.11977	AL121936.2	unprocessed_pseudogene	5.5177	6.34474
ENSG00000148680.15	70.5161	-0.0958201	0.0216734	-4.42109	9.82047e-06	0.000234567	0.93574	HTR7	protein_coding	80.8673	75.65
ENSG00000181444.12	407.926	0.130046	0.0294298	4.41886	9.92225e-06	0.000236821	1.09433	ZNF467	protein_coding	395.909	445.047
ENSG00000123636.17	9829.19	0.0922472	0.0208834	4.41725	9.99658e-06	0.000238417	1.06603	BAZ2B	protein_coding	10194.3	11197.9
ENSG00000222942.1	5.29689	-0.160171	0.0362626	-4.41699	1.00084e-05	0.000238521	0.894919	RN7SKP58	misc_RNA	6.24779	5.70263
ENSG00000197019.4	358.61	0.0779786	0.0176619	4.41508	1.00972e-05	0.000240459	1.05554	SERTAD1	protein_coding	368.697	397.953
ENSG00000184588.17	3016.5	0.0852629	0.0193152	4.41428	1.01345e-05	0.000241166	1.06088	PDE4B	protein_coding	3187.79	3377.82
ENSG00000204344.14	281.701	0.0563382	0.0127642	4.41377	1.01584e-05	0.000241555	1.03982	STK19	protein_coding	294.951	314.013
ENSG00000153944.10	1928.85	-0.0543423	0.0123156	-4.41247	1.02196e-05	0.000242831	0.963033	MSI2	protein_coding	2167	2089.94
ENSG00000167657.13	634.977	0.0892401	0.0202277	4.41177	1.02527e-05	0.000243434	1.06381	DAPK3	protein_coding	642.728	698.239
ENSG00000135838.13	3259.52	0.103762	0.0235207	4.41151	1.02654e-05	0.000243555	1.07457	NPL	protein_coding	3297.69	3675.69
ENSG00000120889.12	2748.58	0.0783188	0.0177592	4.41003	1.03356e-05	0.000245039	1.05579	TNFRSF10B	protein_coding	2817.64	3050.57
ENSG00000163705.12	22.126	0.0821589	0.0186327	4.4094	1.03658e-05	0.000245572	1.0586	FANCD2OS	protein_coding	22.1062	23.825
ENSG00000233806.7	108.916	-0.096568	0.0219046	-4.40857	1.04054e-05	0.000246329	0.935255	LINC01237	processed_transcript	123.498	115.739
ENSG00000033327.12	1848.93	0.129771	0.0294403	4.40795	1.04352e-05	0.00024685	1.09412	GAB2	protein_coding	1836.37	2081.13
ENSG00000272449.2	221.273	0.113163	0.025675	4.40751	1.04565e-05	0.000247084	1.0816	AL139246.5	lincRNA	218.345	245.205
ENSG00000101367.8	2759.32	0.0681372	0.0154596	4.40743	1.04605e-05	0.000247084	1.04836	MAPRE1	protein_coding	2911.84	3094.86
ENSG00000140299.11	4611.94	0.0972646	0.0220704	4.40702	1.04803e-05	0.000247368	1.06974	BNIP2	protein_coding	4813.04	5184.12
ENSG00000175854.11	82.2897	0.0822688	0.0186692	4.40667	1.04974e-05	0.000247588	1.05868	SWI5	protein_coding	85.1836	90.7605
ENSG00000175198.16	533.25	-0.0635169	0.0144212	-4.40443	1.06064e-05	0.000249973	0.956929	PCCA	protein_coding	594.197	581.039
ENSG00000163346.16	4067.08	0.0925462	0.0210168	4.40344	1.06547e-05	0.000250927	1.06625	PBXIP1	protein_coding	4211.44	4526.08
ENSG00000221995.5	201.243	-0.120528	0.0273857	-4.40112	1.07692e-05	0.000253438	0.919851	TIAF1	protein_coding	227.812	214.446
ENSG00000184014.7	5015.18	0.0932997	0.021201	4.40073	1.07888e-05	0.000253711	1.06681	DENND5A	protein_coding	5171.75	5647.62
ENSG00000186162.10	215.685	0.0531166	0.0120721	4.39995	1.08278e-05	0.00025414	1.0375	CIDECP	transcribed_unprocessed_pseudogene	222.21	236.084
ENSG00000100592.15	430.62	-0.0549944	0.012499	-4.39992	1.08292e-05	0.00025414	0.962598	DAAM1	protein_coding	483.354	465.392
ENSG00000284770.1	341.705	-0.0513734	0.0116761	-4.39988	1.08309e-05	0.00025414	0.965017	TBCE	protein_coding	374.584	369.291
ENSG00000135900.3	718.624	0.0794234	0.0180538	4.39927	1.08617e-05	0.000254639	1.0566	MRPL44	protein_coding	751.533	801.692
ENSG00000273118.1	20.437	-0.169326	0.0384907	-4.39914	1.08681e-05	0.000254639	0.889258	AC093865.1	sense_overlapping	24.1482	21.9776
ENSG00000262766.1	51.2898	0.105243	0.0239283	4.39829	1.09109e-05	0.000255453	1.07568	AC135050.5	sense_intronic	50.8075	55.6013
ENSG00000008083.13	3300.7	0.0910113	0.0206981	4.39709	1.09713e-05	0.000256679	1.06512	JARID2	protein_coding	3382.94	3687.18
ENSG00000130177.15	946.849	-0.0769065	0.017493	-4.39641	1.10057e-05	0.000257296	0.948088	CDC16	protein_coding	1075.24	1037.35
ENSG00000176749.8	422.158	0.129372	0.0294365	4.39497	1.10789e-05	0.000258819	1.09382	CDK5R1	protein_coding	419.637	473.876
ENSG00000201573.1	8.18111	-0.128234	0.0291851	-4.39381	1.11383e-05	0.000260016	0.914951	RF00019	misc_RNA	9.61504	8.85789
ENSG00000202239.1	4.41791	-0.1747	0.0397653	-4.39329	1.11651e-05	0.000260339	0.885951	RNU6-396P	snRNA	5.23009	4.73158
ENSG00000119559.15	638.771	0.0694938	0.0158184	4.39322	1.11685e-05	0.000260339	1.04935	C19orf25	protein_coding	652.102	694.143
ENSG00000176845.12	1342.34	0.110491	0.0251621	4.39117	1.12741e-05	0.00026261	1.0796	METRNL	protein_coding	1354.05	1495.99
ENSG00000273143.1	8.6226	-0.127469	0.029034	-4.39033	1.13178e-05	0.000263436	0.915436	AL355512.1	lincRNA	9.51991	9.12895
ENSG00000244328.3	2.96091	-0.21747	0.0495397	-4.3898	1.13452e-05	0.000263882	0.860073	RN7SL845P	misc_RNA	3.36504	3.01053
ENSG00000214013.9	1346.06	-0.0539488	0.0122957	-4.38762	1.14597e-05	0.00026635	0.963296	GANC	protein_coding	1502.48	1473.75
ENSG00000273035.1	11.6659	-0.107324	0.0244704	-4.38588	1.15518e-05	0.000268297	0.928308	AC007684.1	sense_intronic	13.6217	12.6868
ENSG00000249635.1	134.602	-0.127165	0.0289959	-4.38561	1.15662e-05	0.000268332	0.915629	AC109361.1	antisense	154.6	143.562
ENSG00000283839.1	325.112	0.118493	0.027019	4.38553	1.15702e-05	0.000268332	1.0856	AC096667.1	antisense	331.637	372.021
ENSG00000123329.17	2358.45	0.12293	0.0280342	4.38501	1.15981e-05	0.000268786	1.08894	ARHGAP9	protein_coding	2362.97	2657.47
ENSG00000092330.16	1914.82	0.0634391	0.0144679	4.38481	1.16088e-05	0.000268838	1.04495	TINF2	protein_coding	2001.76	2128.24
ENSG00000109189.12	463.692	-0.0717278	0.0163591	-4.38459	1.16202e-05	0.000268907	0.951498	USP46	protein_coding	524.699	504.455
ENSG00000185000.11	773.382	0.0889276	0.0202902	4.38277	1.17177e-05	0.000270837	1.06358	DGAT1	protein_coding	778.522	846.097
ENSG00000158869.10	1567.9	0.111917	0.0255359	4.38272	1.17206e-05	0.000270837	1.08066	FCER1G	protein_coding	1545.43	1713
ENSG00000279368.1	9.02052	-0.307584	0.0701849	-4.38248	1.17338e-05	0.000270947	0.807994	AL031123.3	TEC	9.52655	7.96974
ENSG00000118900.14	3537.08	0.116255	0.026547	4.37922	1.19106e-05	0.000274829	1.08392	UBN1	protein_coding	3549.62	3971.07
ENSG00000141293.15	503.381	-0.0966412	0.0220716	-4.37854	1.19479e-05	0.000275492	0.935208	SKAP1	protein_coding	578.885	539.775
ENSG00000137642.12	59878.2	0.108326	0.0247494	4.37692	1.20366e-05	0.000277336	1.07798	SORL1	protein_coding	61380.7	67637.5
ENSG00000166888.11	6187.41	0.0867149	0.0198134	4.37658	1.20557e-05	0.000277576	1.06195	STAT6	protein_coding	6305.42	6827.05
ENSG00000271327.1	98.6638	0.098749	0.0225658	4.37605	1.20849e-05	0.000278048	1.07084	AC010201.2	lincRNA	101.031	112.064
ENSG00000067900.7	5706.44	0.0818469	0.018711	4.37426	1.21847e-05	0.000280143	1.05837	ROCK1	protein_coding	5960.8	6387.49
ENSG00000115977.18	4227.32	-0.0815203	0.0186373	-4.37405	1.21963e-05	0.000280207	0.945061	AAK1	protein_coding	4815.91	4553.08
ENSG00000271976.1	94.4385	-0.0381172	0.00871562	-4.37344	1.22306e-05	0.000280793	0.973925	AC012467.2	antisense	105.23	103.438
ENSG00000224530.1	6.21475	-0.296164	0.0677219	-4.37324	1.22418e-05	0.000280848	0.814415	PPIAP10	processed_pseudogene	7.37168	6.36974
ENSG00000108840.15	735.257	0.0912106	0.0208588	4.37277	1.2268e-05	0.000281248	1.06526	HDAC5	protein_coding	735.666	803.204
ENSG00000164506.14	4641.53	0.0939296	0.0214881	4.37123	1.23547e-05	0.000283033	1.06727	STXBP5	protein_coding	4833.59	5265.29
ENSG00000149124.10	335.146	0.0896243	0.0205047	4.37092	1.23725e-05	0.000283237	1.06409	GLYAT	protein_coding	351.482	379.304
ENSG00000164758.7	404.276	0.10072	0.0230488	4.36987	1.2432e-05	0.000284396	1.07231	MED30	protein_coding	417.347	454.391
ENSG00000172594.12	167.223	0.125969	0.0288286	4.3696	1.24473e-05	0.000284542	1.09124	SMPDL3A	protein_coding	168.971	188.222
ENSG00000231154.1	24.3768	-0.0752165	0.0172165	-4.36886	1.24898e-05	0.000285309	0.9492	MORF4L2-AS1	antisense	27.4027	25.9303
ENSG00000116863.10	600.32	0.083596	0.0191391	4.3678	1.25503e-05	0.000286313	1.05966	ADPRHL2	protein_coding	624.438	671.971
ENSG00000164967.9	301.694	0.0868768	0.0198904	4.36778	1.25517e-05	0.000286313	1.06207	RPP25L	protein_coding	313.358	337.228
ENSG00000273682.1	23.0163	-0.0769674	0.0176238	-4.36725	1.25821e-05	0.000286602	0.948048	AC109583.2	processed_pseudogene	25.9137	24.9789
ENSG00000103091.14	648.61	-0.0524124	0.0120013	-4.36725	1.25823e-05	0.000286602	0.964322	WDR59	protein_coding	712.431	696.387
ENSG00000137947.11	687.973	0.105225	0.0241043	4.36542	1.2688e-05	0.000288804	1.07566	GTF2B	protein_coding	717.551	773.386
ENSG00000187116.13	2897.55	0.147984	0.0339134	4.3636	1.27939e-05	0.000291007	1.10802	LILRA5	protein_coding	2838.08	3249.31
ENSG00000131059.11	74.075	-0.135833	0.0311317	-4.36317	1.28193e-05	0.000291377	0.910144	BPIFA3	protein_coding	86.7013	80.7132
ENSG00000241764.3	92.4674	0.130232	0.0298515	4.36267	1.28484e-05	0.00029183	1.09447	AC002467.1	antisense	92.896	104.543
ENSG00000143013.12	724.35	0.0598092	0.0137098	4.36251	1.28577e-05	0.000291834	1.04233	LMO4	protein_coding	757.482	807.636
ENSG00000125779.22	2299.34	0.053235	0.0122046	4.3619	1.28939e-05	0.000292447	1.03759	PANK2	protein_coding	2421.83	2561.84
ENSG00000103121.8	588.211	-0.06292	0.0144261	-4.36154	1.29153e-05	0.000292725	0.957325	CMC2	protein_coding	656.115	638.961
ENSG00000276649.1	320.319	0.117723	0.0269925	4.36134	1.2927e-05	0.000292783	1.08502	AL117335.1	antisense	318.086	356.463
ENSG00000270696.1	109.844	-0.0815129	0.0186917	-4.36092	1.29517e-05	0.000293134	0.945066	AC005034.3	antisense	124.69	117.424
ENSG00000223546.6	280.004	-0.0749394	0.017187	-4.36025	1.29916e-05	0.000293802	0.949382	LINC00630	lincRNA	312.555	305.003
ENSG00000080854.14	87.0518	-0.16216	0.0371916	-4.36011	1.29996e-05	0.000293802	0.893686	IGSF9B	protein_coding	100.319	88.2105
ENSG00000213064.9	4214.96	-0.0860923	0.0197521	-4.35864	1.30873e-05	0.000295501	0.942071	SFT2D2	protein_coding	4727.62	4602.67
ENSG00000278985.1	113.444	-0.0866512	0.0198808	-4.35854	1.30933e-05	0.000295501	0.941706	AC092718.7	TEC	126.363	121.541
ENSG00000177674.15	672.337	0.0971574	0.0222947	4.35786	1.31341e-05	0.000296104	1.06966	AGTRAP	protein_coding	681.69	753.316
ENSG00000116337.15	2201.15	0.119596	0.0274441	4.35778	1.31385e-05	0.000296104	1.08643	AMPD2	protein_coding	2202.18	2449.43
ENSG00000247679.2	43.8628	-0.118881	0.0272874	-4.35663	1.32082e-05	0.000297315	0.920902	AC139795.2	antisense	48.0619	44.8303
ENSG00000285736.1	13.6975	-0.100547	0.0230792	-4.35658	1.32109e-05	0.000297315	0.93268	AC131025.3	bidirectional_promoter_lncRNA	15.1704	14.4632
ENSG00000196312.13	1915.87	-0.0579634	0.0133064	-4.35605	1.32429e-05	0.000297824	0.960619	MFSD14C	protein_coding	2103.9	2068.75
ENSG00000110203.8	534.953	0.305065	0.0700473	4.35513	1.32989e-05	0.00029872	1.23547	FOLR3	protein_coding	481.951	626.057
ENSG00000135473.14	641.918	-0.0695384	0.0159672	-4.35509	1.33014e-05	0.00029872	0.952943	PAN2	protein_coding	731.655	702.784
ENSG00000087338.4	1401.67	0.0788976	0.0181171	4.35487	1.33148e-05	0.000298811	1.05621	GMCL1	protein_coding	1468.5	1571.99
ENSG00000272501.1	989.28	0.0933994	0.0214509	4.35411	1.33611e-05	0.00029964	1.06688	AL662844.4	antisense	1000.6	1103.38
ENSG00000232479.2	52.5371	-0.103179	0.0236987	-4.35378	1.33813e-05	0.000299882	0.930979	AC010900.1	processed_pseudogene	59.9513	56.4447
ENSG00000255150.2	191.896	0.0729688	0.0167644	4.35262	1.34522e-05	0.00030126	1.05188	EID3	protein_coding	200.482	214.63
ENSG00000111300.9	982.295	-0.0542303	0.0124604	-4.3522	1.34777e-05	0.00030162	0.963108	NAA25	protein_coding	1109.33	1067.71
ENSG00000109685.17	1241.57	-0.0593848	0.0136527	-4.34967	1.36341e-05	0.000304696	0.959673	NSD2	protein_coding	1364.85	1336.24
ENSG00000070501.11	697.807	0.0838629	0.0192803	4.34967	1.36343e-05	0.000304696	1.05985	POLB	protein_coding	734.473	781.184
ENSG00000119596.17	2283.99	-0.0636561	0.014639	-4.34838	1.37147e-05	0.000306279	0.956836	YLPM1	protein_coding	2600.22	2481.97
ENSG00000232282.1	3.9594	-0.183083	0.0421065	-4.3481	1.37321e-05	0.000306453	0.880819	MTND1P32	processed_pseudogene	4.64381	4.22368
ENSG00000164104.11	1698.73	0.164057	0.0377516	4.34569	1.38837e-05	0.000309619	1.12043	HMGB2	protein_coding	1684.43	1934.58
ENSG00000158715.5	122.464	0.240312	0.055317	4.34428	1.39735e-05	0.000311406	1.18125	SLC45A3	protein_coding	118.303	137.917
ENSG00000033627.16	1133.63	0.0740838	0.0170599	4.34257	1.40827e-05	0.00031362	1.05269	ATP6V0A1	protein_coding	1175.21	1268.29
ENSG00000221771.1	3.91436	-0.185463	0.0427159	-4.34178	1.4133e-05	0.000314279	0.879367	MIR1205	miRNA	4.59956	4.10921
ENSG00000035664.11	1855.96	0.118616	0.0273198	4.34175	1.41355e-05	0.000314279	1.08569	DAPK2	protein_coding	1834.71	2115.34
ENSG00000276791.1	402.814	0.0983077	0.022643	4.34164	1.41424e-05	0.000314279	1.07052	AC092117.1	lincRNA	411.046	443.626
ENSG00000188315.7	987.761	0.0869707	0.0200324	4.34149	1.41517e-05	0.000314279	1.06214	C3orf62	protein_coding	1004.4	1099.6
ENSG00000087206.16	1975.32	0.0622388	0.0143391	4.3405	1.42157e-05	0.000315364	1.04408	UIMC1	protein_coding	2065.98	2200.67
ENSG00000035681.8	1427.88	0.0567492	0.0130746	4.34043	1.42203e-05	0.000315364	1.04012	NSMAF	protein_coding	1517.42	1601.43
ENSG00000135823.13	2124.62	0.0564469	0.0130078	4.33945	1.42838e-05	0.000316553	1.0399	STX6	protein_coding	2242.88	2385.24
ENSG00000263712.1	14.0929	0.0985183	0.0227042	4.33921	1.42995e-05	0.000316682	1.07067	MIR4639	miRNA	14.9823	16.2474
ENSG00000265118.5	126.879	0.152525	0.0351874	4.33466	1.45987e-05	0.000323083	1.11151	AC134669.1	protein_coding	127.659	144.826
ENSG00000121067.17	2154.99	0.0556807	0.0128501	4.3331	1.47022e-05	0.000325149	1.03935	SPOP	protein_coding	2283.15	2402.83
ENSG00000185420.18	366.278	-0.0881816	0.0203599	-4.33115	1.48335e-05	0.000327824	0.940708	SMYD3	protein_coding	420.128	399.68
ENSG00000196227.10	1065.92	0.0590875	0.013645	4.33034	1.48882e-05	0.000328807	1.04181	FAM217B	protein_coding	1115.64	1194.17
ENSG00000168610.14	5568.22	0.0957886	0.0221282	4.3288	1.49925e-05	0.00033088	1.06865	STAT3	protein_coding	5669.77	6211.46
ENSG00000236334.2	569.74	-0.0975522	0.0225387	-4.3282	1.50332e-05	0.000331551	0.934617	PPIAL4G	protein_coding	656.788	610.561
ENSG00000148290.9	359.517	0.069335	0.0160232	4.32716	1.51046e-05	0.000332896	1.04923	SURF1	protein_coding	380.894	404.707
ENSG00000160856.20	1239.15	-0.148264	0.034273	-4.32596	1.51867e-05	0.000334389	0.902336	FCRL3	protein_coding	1437.59	1320.66
ENSG00000225889.7	774.696	0.119208	0.027557	4.32587	1.51933e-05	0.000334389	1.08614	AC012368.1	antisense	780.438	872.338
ENSG00000155966.13	263.407	0.126779	0.0293128	4.32503	1.52513e-05	0.000335433	1.09185	AFF2	protein_coding	261.646	292.263
ENSG00000084073.8	1184.37	0.0963088	0.0222729	4.32402	1.53208e-05	0.000336731	1.06903	ZMPSTE24	protein_coding	1236.74	1335.69
ENSG00000197403.4	14.2196	0.308262	0.0713008	4.3234	1.5364e-05	0.000337448	1.23822	OR6N1	protein_coding	12.9845	16.8579
ENSG00000149534.8	153.098	0.225828	0.052237	4.32315	1.53816e-05	0.000337603	1.16945	MS4A2	protein_coding	152.96	172.913
ENSG00000118217.5	4103.9	0.0733831	0.0169758	4.32281	1.54053e-05	0.00033789	1.05218	ATF6	protein_coding	4317.48	4577.16
ENSG00000256683.6	785.526	0.0784466	0.0181482	4.32255	1.54236e-05	0.000338059	1.05588	ZNF350	protein_coding	822.215	876.586
ENSG00000164164.16	1432.04	-0.0568851	0.0131634	-4.32146	1.55002e-05	0.000339482	0.961337	OTUD4	protein_coding	1612.19	1565.28
ENSG00000259962.1	40.8431	0.158964	0.036787	4.3212	1.55186e-05	0.000339482	1.11649	AC007342.2	unprocessed_pseudogene	40.9004	46.8974
ENSG00000134324.11	1581	-0.0562002	0.0130058	-4.32117	1.55204e-05	0.000339482	0.961794	LPIN1	protein_coding	1763.78	1713.86
ENSG00000151503.12	627.4	-0.0578179	0.013388	-4.31862	1.57006e-05	0.000342991	0.960716	NCAPD3	protein_coding	704.624	684.159
ENSG00000214078.12	2342.81	0.0645245	0.0149415	4.31847	1.57113e-05	0.000342991	1.04574	CPNE1	protein_coding	2454.47	2601.65
ENSG00000276418.5	8.33893	-0.212375	0.0491785	-4.31845	1.57131e-05	0.000342991	0.863115	AC036214.3	protein_coding	10.0973	8.875
ENSG00000177173.5	282.625	0.0942035	0.0218155	4.31818	1.57319e-05	0.000343167	1.06748	NAP1L4P1	processed_pseudogene	289.46	320.396
ENSG00000166501.13	9765.05	0.06395	0.0148137	4.31697	1.58189e-05	0.00034483	1.04532	PRKCB	protein_coding	10239.9	10956.9
ENSG00000204176.13	158.936	-0.128446	0.0297586	-4.31626	1.58694e-05	0.000345695	0.914816	SYT15	protein_coding	175.104	166.963
ENSG00000279430.1	52.3839	0.141062	0.0326898	4.31517	1.59482e-05	0.000347175	1.10272	AL590560.2	TEC	52.0885	58.6618
ENSG00000224597.10	320.657	-0.0615337	0.0142636	-4.31403	1.60308e-05	0.000348736	0.958245	SVIL-AS1	transcribed_unprocessed_pseudogene	356.467	349.689
ENSG00000112531.16	8218.74	0.0856068	0.0198468	4.31338	1.60778e-05	0.00034952	1.06113	QKI	protein_coding	8505.17	9327.01
ENSG00000260840.1	42.7978	-0.127914	0.0296772	-4.3102	1.6311e-05	0.000354349	0.915153	LINC01964	lincRNA	49.4336	45.6592
ENSG00000197405.7	1467.54	0.132833	0.0308277	4.30888	1.64086e-05	0.000356227	1.09644	C5AR1	protein_coding	1449.66	1647.76
ENSG00000196456.11	104.745	0.0827403	0.0192053	4.3082	1.64591e-05	0.000357079	1.05903	ZNF775	protein_coding	106.566	115.093
ENSG00000140993.10	353.754	0.139326	0.0323427	4.30781	1.64877e-05	0.000357457	1.10139	TIGD7	protein_coding	365.323	400.08
ENSG00000223704.1	335.337	-0.108168	0.0251308	-4.30419	1.67595e-05	0.000363105	0.927766	LINC01422	lincRNA	374.622	357.612
ENSG00000254665.1	8.08422	-0.127796	0.0297026	-4.30252	1.68869e-05	0.000365615	0.915229	AC091053.1	antisense	9.27434	8.60789
ENSG00000117758.13	1178.49	0.0566515	0.0131677	4.30233	1.69015e-05	0.000365684	1.04005	STX12	protein_coding	1246.86	1320.97
ENSG00000108061.11	3481.06	0.09688	0.0225237	4.30125	1.6984e-05	0.00036722	1.06946	SHOC2	protein_coding	3607.83	3904.44
ENSG00000254271.1	5.67202	-0.150957	0.035107	-4.2999	1.70872e-05	0.000369201	0.900653	AC022390.1	lincRNA	6.79646	6.01184
ENSG00000117298.15	2548.23	0.112029	0.0260579	4.29923	1.71394e-05	0.000370079	1.08075	ECE1	protein_coding	2510.68	2799.59
ENSG00000132323.8	488.675	-0.0601332	0.0139911	-4.29797	1.72373e-05	0.000371941	0.959176	ILKAP	protein_coding	543.619	531.292
ENSG00000160229.11	470.112	0.118694	0.0276268	4.29633	1.73651e-05	0.000374446	1.08575	ZNF66	protein_coding	487.159	521.908
ENSG00000175182.14	436.239	0.0709157	0.0165098	4.29538	1.74394e-05	0.000375795	1.05038	FAM131A	protein_coding	449.117	484.024
ENSG00000225025.2	15.964	-0.193339	0.0450292	-4.29365	1.75761e-05	0.000378486	0.874579	KIF4CP	processed_pseudogene	19.0354	16.9763
ENSG00000008438.4	87.3502	0.190685	0.0444186	4.29291	1.76345e-05	0.000379364	1.14131	PGLYRP1	protein_coding	82.365	98.0908
ENSG00000164828.17	1121.23	-0.0616251	0.0143553	-4.29283	1.76407e-05	0.000379364	0.958184	SUN1	protein_coding	1270.8	1218.54
ENSG00000146776.14	614.244	-0.0645124	0.015029	-4.29252	1.76658e-05	0.000379647	0.956268	ATXN7L1	protein_coding	680.869	655.549
ENSG00000228415.3	7.02036	-0.138357	0.0322462	-4.29064	1.78162e-05	0.000382339	0.908553	PTMAP1	processed_pseudogene	7.91593	7.28026
ENSG00000278972.1	119.064	-0.106822	0.0248972	-4.29051	1.7826e-05	0.000382339	0.928631	AC015920.1	TEC	136.562	128.47
ENSG00000198648.10	692.683	-0.0829145	0.0193251	-4.2905	1.78269e-05	0.000382339	0.944148	STK39	protein_coding	792.637	757.868
ENSG00000130706.12	305.209	0.0804849	0.018761	4.29002	1.7866e-05	0.00038292	1.05737	ADRM1	protein_coding	310.659	334.975
ENSG00000140396.12	6314.09	0.063383	0.0147806	4.28827	1.80074e-05	0.000385691	1.04491	NCOA2	protein_coding	6564.88	7033.57
ENSG00000077585.13	166.772	-0.0860195	0.020062	-4.28769	1.80541e-05	0.000386433	0.942119	GPR137B	protein_coding	185.814	181.558
ENSG00000248508.6	97.6642	-0.0799587	0.0186495	-4.28746	1.80732e-05	0.000386582	0.946085	SRP14-AS1	lincRNA	110.737	105.288
ENSG00000261087.1	133.103	-0.0833905	0.0194712	-4.28277	1.84584e-05	0.000394557	0.943837	AP003469.4	lincRNA	149.606	142.472
ENSG00000139233.6	1413.76	0.0476352	0.011123	4.28257	1.84745e-05	0.000394638	1.03357	LLPH	protein_coding	1502.33	1575.67
ENSG00000071127.16	5725.29	0.0640655	0.0149607	4.28226	1.85003e-05	0.000394924	1.04541	WDR1	protein_coding	5938.77	6351.53
ENSG00000182871.14	1600.95	0.183936	0.042957	4.28186	1.8534e-05	0.00039538	1.13598	COL18A1	protein_coding	1523.84	1802.44
ENSG00000246145.1	73.1898	-0.120484	0.0281471	-4.28053	1.86446e-05	0.000397374	0.919879	RRS1-AS1	lincRNA	83.3319	78.7145
ENSG00000119723.16	351.34	-0.0486657	0.0113693	-4.28044	1.86524e-05	0.000397374	0.96683	COQ6	protein_coding	389.586	381.397
ENSG00000102265.11	409.833	0.130704	0.0305464	4.27889	1.8783e-05	0.00039989	1.09483	TIMP1	protein_coding	401.881	444.834
ENSG00000271857.1	33.616	0.108546	0.0253704	4.27846	1.88192e-05	0.000400393	1.07814	AL096865.1	antisense	34.5221	38.1092
ENSG00000104218.14	438.877	-0.0680865	0.0159157	-4.27794	1.88631e-05	0.000401062	0.953902	CSPP1	protein_coding	490.934	469.133
ENSG00000125449.6	179.642	0.0788295	0.0184289	4.27749	1.89011e-05	0.000401579	1.05616	ARMC7	protein_coding	181.699	195.25
ENSG00000131844.15	523.944	-0.0528887	0.0123648	-4.27736	1.89126e-05	0.000401579	0.964004	MCCC2	protein_coding	585.551	568.25
ENSG00000145868.16	3677.05	0.0670789	0.015684	4.2769	1.89512e-05	0.000402131	1.04759	FBXO38	protein_coding	3879.64	4137.2
ENSG00000139132.14	2485.63	0.102155	0.0238907	4.27593	1.90342e-05	0.00040347	1.07338	FGD4	protein_coding	2519.55	2821.3
ENSG00000134262.12	825.302	-0.0473657	0.0110774	-4.27587	1.90396e-05	0.00040347	0.967702	AP4B1	protein_coding	922.226	905.207
ENSG00000261687.1	7.86682	-0.128453	0.0300444	-4.27543	1.90767e-05	0.000403988	0.914812	AC068724.1	antisense	9.15708	8.35
ENSG00000134152.10	2077.81	0.0976874	0.0228526	4.27467	1.91417e-05	0.000405096	1.07006	KATNBL1	protein_coding	2168.19	2349.03
ENSG00000103994.17	7399.52	0.0730513	0.0170905	4.27437	1.91677e-05	0.000405377	1.05194	ZNF106	protein_coding	7688.8	8310.8
ENSG00000070190.12	3949.25	0.0978698	0.0229001	4.27377	1.92196e-05	0.000406206	1.07019	DAPP1	protein_coding	4161.2	4420.49
ENSG00000079246.15	7900.79	0.0798826	0.0186965	4.27259	1.93216e-05	0.000408092	1.05693	XRCC5	protein_coding	8325.21	8874.83
ENSG00000105583.10	503.615	0.0899582	0.0210597	4.27158	1.94091e-05	0.000409668	1.06434	WDR83OS	protein_coding	516.361	566.007
ENSG00000139433.9	1067.99	0.0664745	0.0155667	4.2703	1.95214e-05	0.000411767	1.04715	GLTP	protein_coding	1093.97	1181.33
ENSG00000213390.10	1695.88	0.0817279	0.0191455	4.26878	1.96545e-05	0.000414302	1.05828	ARHGAP19	protein_coding	1760.26	1923.76
ENSG00000225062.1	37.355	0.181025	0.0424281	4.26664	1.98441e-05	0.000418004	1.13369	CATIP-AS1	processed_transcript	34.3097	41.6697
ENSG00000200354.1	137.464	0.199624	0.0467886	4.2665	1.98563e-05	0.000418004	1.1484	SNORA71D	snoRNA	141.825	164.63
ENSG00000101493.10	4380.23	0.101178	0.0237167	4.26609	1.98929e-05	0.000418499	1.07265	ZNF516	protein_coding	4377.83	4886.33
ENSG00000120727.12	1761.29	0.108259	0.0253783	4.26581	1.99181e-05	0.000418671	1.07793	PAIP2	protein_coding	1809.86	1965.72
ENSG00000182831.11	15189.3	0.0648076	0.0151927	4.2657	1.99274e-05	0.000418671	1.04595	C16orf72	protein_coding	15924.5	17070.2
ENSG00000100246.12	116.303	0.066215	0.015524	4.26534	1.99602e-05	0.000419085	1.04697	DNAL4	protein_coding	121.381	129.012
ENSG00000113916.17	4596.46	0.140941	0.0330588	4.26336	2.01378e-05	0.000422194	1.10262	BCL6	protein_coding	4539.32	5169.85
ENSG00000033800.13	4631.19	0.0631371	0.0148093	4.26334	2.01393e-05	0.000422194	1.04474	PIAS1	protein_coding	4829.77	5141.25
ENSG00000170832.12	6609.46	0.0842415	0.0197599	4.26325	2.01479e-05	0.000422194	1.06013	USP32	protein_coding	6788.44	7371.14
ENSG00000151445.15	722.069	0.0413579	0.00970226	4.26271	2.01958e-05	0.00042292	1.02908	VIPAS39	protein_coding	763.675	800.545
ENSG00000107341.4	1494.5	0.0785854	0.0184403	4.26162	2.02948e-05	0.000424715	1.05598	UBE2R2	protein_coding	1543.93	1674.45
ENSG00000121966.6	5929.83	0.0979266	0.0229819	4.26102	2.03494e-05	0.000425579	1.07023	CXCR4	protein_coding	6132.3	6594.25
ENSG00000072110.13	2864.09	0.12102	0.0284034	4.26074	2.03752e-05	0.000425839	1.0875	ACTN1	protein_coding	2856.79	3169.83
ENSG00000171443.6	216.56	0.0880509	0.020673	4.25923	2.05135e-05	0.000428448	1.06293	ZNF524	protein_coding	218.031	235.932
ENSG00000135870.11	6422.81	0.0572748	0.0134492	4.25859	2.05724e-05	0.000429398	1.0405	RC3H1	protein_coding	6756.15	7147.24
ENSG00000101189.6	307.091	0.0775016	0.0182016	4.25795	2.06313e-05	0.000430347	1.05519	MRGBP	protein_coding	317.066	342.57
ENSG00000285732.1	8.82064	-0.267172	0.0627886	-4.2551	2.08954e-05	0.000435571	0.830947	AC121334.3	antisense	9.92478	8.26184
ENSG00000106780.8	8256.02	0.106267	0.0249797	4.25412	2.09871e-05	0.00043709	1.07644	MEGF9	protein_coding	8344.06	9388.12
ENSG00000079819.18	372.064	-0.0896757	0.0210802	-4.25403	2.09956e-05	0.00043709	0.939734	EPB41L2	protein_coding	429.925	400.805
ENSG00000137752.23	4480.54	0.104066	0.0244647	4.25371	2.10261e-05	0.000437438	1.0748	CASP1	protein_coding	4664.75	5095.29
ENSG00000254539.1	36.5619	-0.152735	0.0359129	-4.25293	2.10995e-05	0.00043868	0.899544	AC239804.1	lincRNA	42.6482	37.5434
ENSG00000204439.3	932.228	0.0689793	0.0162213	4.2524	2.11493e-05	0.000439429	1.04897	C6orf47	protein_coding	975.496	1046.21
ENSG00000102393.10	391.852	0.0950166	0.0223486	4.25157	2.12278e-05	0.000440611	1.06808	GLA	protein_coding	406.465	440.164
ENSG00000213341.10	1255.22	0.0901066	0.0211941	4.2515	2.12347e-05	0.000440611	1.06445	CHUK	protein_coding	1305.88	1411.71
ENSG00000280119.1	111.442	-0.123471	0.0290426	-4.25136	2.12476e-05	0.000440611	0.917977	AC093642.2	TEC	125.148	116.491
ENSG00000165119.20	13460.1	0.0812632	0.0191162	4.25102	2.12801e-05	0.000440999	1.05794	HNRNPK	protein_coding	14095.4	15115.4
ENSG00000170619.9	414.371	0.0586309	0.0137945	4.2503	2.13485e-05	0.00044213	1.04148	COMMD5	protein_coding	430.277	457.393
ENSG00000232931.5	865.099	-0.0948805	0.0223265	-4.24969	2.14066e-05	0.000443045	0.93635	LINC00342	lincRNA	986.341	934.849
ENSG00000013810.18	1382.21	0.0994896	0.0234226	4.24758	2.16089e-05	0.000446942	1.07139	TACC3	protein_coding	1397.04	1534.28
ENSG00000274559.3	172.1	0.113329	0.0266894	4.2462	2.17424e-05	0.000449413	1.08172	H2BFS	protein_coding	170.827	189.705
ENSG00000163138.18	309.529	-0.0672946	0.0158493	-4.24592	2.17702e-05	0.000449696	0.954426	PACRGL	protein_coding	346.128	335.761
ENSG00000108100.17	3032.22	0.0627343	0.0147785	4.24498	2.18611e-05	0.000451282	1.04444	CCNY	protein_coding	3180.77	3388.56
ENSG00000069399.14	413.228	0.135215	0.0318685	4.24289	2.20656e-05	0.000455209	1.09826	BCL3	protein_coding	398.779	443.279
ENSG00000150403.17	1699.03	0.0666985	0.0157239	4.24187	2.21669e-05	0.000457004	1.04732	TMCO3	protein_coding	1766.62	1898.1
ENSG00000248559.1	41.8117	0.101394	0.0239081	4.241	2.22527e-05	0.000458478	1.07281	AC109454.2	antisense	42.1704	46.4368
ENSG00000197956.9	2280.16	0.0957113	0.0225749	4.23971	2.23805e-05	0.000460813	1.06859	S100A6	protein_coding	2353.76	2585.58
ENSG00000271741.1	205.318	-0.0746081	0.0175993	-4.23926	2.24262e-05	0.000461457	0.9496	AC114490.2	protein_coding	229.173	220.075
ENSG00000066084.12	5619.26	0.0728385	0.0171893	4.23744	2.26082e-05	0.000464902	1.05178	DIP2B	protein_coding	5879.93	6282.44
ENSG00000118680.13	4030.73	0.110914	0.0261788	4.23679	2.26738e-05	0.000465952	1.07991	MYL12B	protein_coding	4142.71	4537.92
ENSG00000105501.12	590.63	0.155908	0.0368001	4.23661	2.26923e-05	0.000466031	1.11412	SIGLEC5	protein_coding	577.929	670.151
ENSG00000067596.11	2633.89	0.0540339	0.012756	4.23597	2.27564e-05	0.000467048	1.03816	DHX8	protein_coding	2776.11	2927.96
ENSG00000136560.13	4090.76	0.0782819	0.0184816	4.23568	2.27863e-05	0.000467361	1.05576	TANK	protein_coding	4290.76	4602.62
ENSG00000214274.9	42.0585	0.145306	0.0343156	4.23438	2.29179e-05	0.000469758	1.10596	ANG	protein_coding	41.8938	47.3974
ENSG00000214114.8	583.519	0.0866005	0.0204565	4.23339	2.3019e-05	0.000471528	1.06187	MYCBP	protein_coding	610.004	656.711
ENSG00000254928.1	19.4619	0.158439	0.0374378	4.23205	2.31571e-05	0.000473949	1.11608	AP001372.3	antisense	19.3473	22.2211
ENSG00000135250.16	3572.47	0.0650043	0.0153604	4.23196	2.31669e-05	0.000473949	1.04609	SRPK2	protein_coding	3741.71	4026.05
ENSG00000150681.9	3868.55	0.187702	0.0443584	4.23149	2.32147e-05	0.000474624	1.13895	RGS18	protein_coding	3831.6	4355.44
ENSG00000087253.12	3372.54	0.110149	0.0260412	4.22979	2.3391e-05	0.000477886	1.07934	LPCAT2	protein_coding	3491.7	3767.55
ENSG00000175106.16	446.27	-0.062837	0.0148563	-4.22966	2.34042e-05	0.000477886	0.95738	TVP23C	protein_coding	498.148	482.318
ENSG00000228939.1	58.2423	-0.124543	0.0294534	-4.22846	2.35292e-05	0.000480059	0.917295	AKT3-IT1	sense_intronic	67.4956	62.2592
ENSG00000169905.12	3408.05	0.0378648	0.00895497	4.22835	2.35407e-05	0.000480059	1.02659	TOR1AIP2	protein_coding	3609.52	3761.16
ENSG00000168591.15	513.222	0.0685684	0.0162171	4.22817	2.35601e-05	0.000480149	1.04868	TMUB2	protein_coding	531.445	572.317
ENSG00000258789.1	23.2759	0.0763568	0.0180651	4.22675	2.3709e-05	0.000482873	1.05435	AL162171.1	antisense	23.4956	25.1039
ENSG00000176225.13	2033.47	-0.0714488	0.016905	-4.22648	2.37373e-05	0.000483142	0.951682	RTTN	protein_coding	2287.12	2203.49
ENSG00000120690.15	5388.71	0.0665804	0.0157575	4.22533	2.38593e-05	0.000485317	1.04723	ELF1	protein_coding	5701.37	6012.15
ENSG00000257022.1	18.7133	-0.164261	0.0388832	-4.22446	2.3951e-05	0.000486872	0.892386	AC008250.1	antisense	21.9757	19.4474
ENSG00000113141.17	3017.4	0.0737777	0.0174707	4.22294	2.41141e-05	0.000489589	1.05247	IK	protein_coding	3155.13	3374.16
ENSG00000134153.9	378.705	0.0784881	0.0185862	4.22292	2.41153e-05	0.000489589	1.05591	EMC7	protein_coding	405.4	433.628
ENSG00000207320.1	5.90709	-0.144592	0.034243	-4.22252	2.41588e-05	0.00049016	0.904635	RF00019	misc_RNA	7.40487	6.11316
ENSG00000165060.12	397.222	-0.0695694	0.0164776	-4.22206	2.42081e-05	0.000490849	0.952922	FXN	protein_coding	434.916	417.957
ENSG00000162739.13	868.578	-0.084618	0.0200434	-4.22173	2.42433e-05	0.00049125	0.943034	SLAMF6	protein_coding	989.396	939.538
ENSG00000161040.16	500.446	0.158936	0.0376507	4.22133	2.4286e-05	0.000491271	1.11646	FBXL13	protein_coding	494.843	578.17
ENSG00000239823.2	11.1896	0.108116	0.025612	4.22131	2.42884e-05	0.000491271	1.07782	RF00019	misc_RNA	11.6549	12.8947
ENSG00000229955.1	302.514	0.0806406	0.0191039	4.22116	2.43053e-05	0.000491271	1.05749	Z98749.1	sense_intronic	319.774	345.254
ENSG00000073150.13	89.2112	0.181849	0.0430804	4.22115	2.43059e-05	0.000491271	1.13434	PANX2	protein_coding	83.2588	96.0105
ENSG00000054967.12	2889.67	0.0946137	0.0224249	4.21914	2.4524e-05	0.00049507	1.06778	RELT	protein_coding	2918.77	3208.59
ENSG00000123146.19	7636.7	0.1159	0.02747	4.21913	2.45248e-05	0.00049507	1.08365	ADGRE5	protein_coding	7636.61	8373.22
ENSG00000115317.11	566.512	0.0662287	0.0156989	4.21869	2.4573e-05	0.000495729	1.04698	HTRA2	protein_coding	595.367	633.214
ENSG00000198898.13	3398.6	0.156607	0.0371251	4.21837	2.46078e-05	0.000496117	1.11466	CAPZA2	protein_coding	3445.43	3847.16
ENSG00000204472.12	1715.79	0.135113	0.0320341	4.21778	2.46715e-05	0.000497087	1.09818	AIF1	protein_coding	1729.55	1939.87
ENSG00000167460.15	4480.45	0.0804144	0.0190689	4.21705	2.47523e-05	0.000498402	1.05732	TPM4	protein_coding	4629.04	4917.48
ENSG00000206448.3	6.30977	-0.141137	0.0334821	-4.2153	2.49446e-05	0.000501956	0.906804	PPIAP30	processed_pseudogene	7.43363	6.65132
ENSG00000143319.16	646.077	0.0404218	0.00959073	4.21468	2.50137e-05	0.000503031	1.02841	ISG20L2	protein_coding	675.5	704.158
ENSG00000138814.16	2274.56	0.0683462	0.0162191	4.21392	2.50971e-05	0.000504391	1.04851	PPP3CA	protein_coding	2396.93	2566.09
ENSG00000104450.12	198.601	0.112991	0.0268198	4.21296	2.52041e-05	0.000506223	1.08147	SPAG1	protein_coding	200.655	222.043
ENSG00000280036.1	27.7022	-0.116507	0.0276559	-4.21274	2.5229e-05	0.000506404	0.922418	AC020661.4	sense_intronic	31.4381	29.5461
ENSG00000267783.1	10.0743	0.115212	0.0273496	4.21256	2.52493e-05	0.000506493	1.08313	AC022098.3	antisense	10.1018	11.4763
ENSG00000171206.14	1462.71	0.085403	0.0202783	4.21156	2.53617e-05	0.000508428	1.06098	TRIM8	protein_coding	1478.96	1605.91
ENSG00000236576.1	84.5507	-0.143466	0.0340677	-4.2112	2.54018e-05	0.000508912	0.905342	AC241520.1	processed_pseudogene	102.887	91.3132
ENSG00000241975.1	127.981	0.105261	0.0249973	4.21091	2.5434e-05	0.000509215	1.07569	ELOCP19	processed_pseudogene	133.113	147.259
ENSG00000275401.1	25.0157	-0.0712593	0.0169231	-4.21078	2.54488e-05	0.000509215	0.951807	AL391095.3	lincRNA	28.2434	27.1684
ENSG00000102524.11	2583.97	0.13845	0.0328872	4.20984	2.55549e-05	0.000511019	1.10072	TNFSF13B	protein_coding	2646.77	2928.31
ENSG00000120129.5	8595.61	0.142326	0.0338103	4.20954	2.55889e-05	0.000511377	1.10368	DUSP1	protein_coding	8254.77	9466.84
ENSG00000241782.1	8.8946	-0.12048	0.0286232	-4.20915	2.56328e-05	0.000511935	0.919882	AP002812.1	processed_pseudogene	10.0044	9.33026
ENSG00000119574.12	199.263	0.0751023	0.0178457	4.20843	2.57148e-05	0.000513149	1.05344	ZBTB45	protein_coding	202.94	216.643
ENSG00000233527.8	80.9473	-0.0402217	0.00955764	-4.20834	2.57258e-05	0.000513149	0.972505	ZNF529-AS1	antisense	87.1106	85.9276
ENSG00000160055.19	242.24	0.0803068	0.0190837	4.20814	2.57485e-05	0.000513282	1.05724	TMEM234	protein_coding	247.473	267.717
ENSG00000138071.13	11229.6	0.0785628	0.01867	4.20796	2.57686e-05	0.000513362	1.05597	ACTR2	protein_coding	11790.5	12652.1
ENSG00000151413.16	291.173	-0.0639583	0.0152011	-4.20747	2.58249e-05	0.000514162	0.956636	NUBPL	protein_coding	324.082	313.114
ENSG00000278023.5	56.9852	-0.131793	0.0313262	-4.20711	2.58653e-05	0.000514579	0.912697	RDM1	protein_coding	65.1128	60.9605
ENSG00000117616.17	10140.4	0.072925	0.0173342	4.207	2.5878e-05	0.000514579	1.05185	RSRP1	protein_coding	10622.5	11360.9
ENSG00000146842.16	264.027	-0.0661692	0.0157324	-4.20592	2.60026e-05	0.000516735	0.955171	TMEM209	protein_coding	295.252	285.425
ENSG00000254556.1	151.902	-0.163146	0.0387934	-4.2055	2.60503e-05	0.000517361	0.893076	AF131215.2	sense_intronic	182.372	164.65
ENSG00000125637.15	4073.68	0.0838037	0.0199301	4.20488	2.61217e-05	0.000518456	1.05981	PSD4	protein_coding	4158.31	4533.38
ENSG00000237903.1	6.05101	-0.148698	0.0353707	-4.20398	2.62265e-05	0.000520214	0.902064	AC004000.1	sense_intronic	6.51991	6.01974
ENSG00000234886.1	7.14145	-0.226404	0.053894	-4.20091	2.65842e-05	0.000526981	0.854763	MTND5P26	processed_pseudogene	8.57522	7.53684
ENSG00000118855.18	3205.99	0.0915721	0.0218001	4.20054	2.66282e-05	0.000527129	1.06553	MFSD1	protein_coding	3344.79	3611.45
ENSG00000219284.2	5.30314	-0.152502	0.0363065	-4.20039	2.66455e-05	0.000527129	0.899689	AL592291.1	unprocessed_pseudogene	6.26991	5.62105
ENSG00000174238.14	1505.74	0.0807601	0.0192272	4.20029	2.6657e-05	0.000527129	1.05758	PITPNA	protein_coding	1553.31	1671.97
ENSG00000261218.5	74.132	0.117002	0.0278557	4.20029	2.66577e-05	0.000527129	1.08448	AC099524.1	lincRNA	73.1969	81.925
ENSG00000273343.1	21.8772	-0.0757645	0.0180416	-4.19943	2.67588e-05	0.000528801	0.948839	AC007663.4	sense_intronic	25.031	23.6632
ENSG00000135842.16	19680.9	0.126469	0.0301197	4.19889	2.6823e-05	0.000529742	1.09162	FAM129A	protein_coding	20020	22093
ENSG00000105656.12	1183.95	0.102552	0.0244246	4.19871	2.68435e-05	0.000529818	1.07367	ELL	protein_coding	1181.97	1307.42
ENSG00000275910.1	24.4976	-0.199974	0.0476317	-4.19834	2.68884e-05	0.000530378	0.870566	AC138932.5	antisense	28.104	24.8118
ENSG00000197386.12	2225.51	-0.0793416	0.0188995	-4.19808	2.69184e-05	0.000530641	0.946489	HTT	protein_coding	2495.23	2413.43
ENSG00000031081.10	521.922	-0.0816735	0.019456	-4.19785	2.69465e-05	0.000530868	0.944961	ARHGAP31	protein_coding	581.591	562.15
ENSG00000226328.6	495.713	0.0887078	0.0211333	4.19754	2.69827e-05	0.000531253	1.06342	NUP50-DT	lincRNA	511.334	559.299
ENSG00000179918.18	439.825	0.0787888	0.0187723	4.19707	2.70389e-05	0.000532031	1.05613	SEPHS2	protein_coding	467.394	499.178
ENSG00000245685.6	212.638	-0.0954782	0.0227544	-4.19604	2.71627e-05	0.000534137	0.935962	FRG1-DT	lincRNA	240.075	226.472
ENSG00000168374.10	1044.12	0.0677661	0.0161517	4.1956	2.72151e-05	0.00053484	1.04809	ARF4	protein_coding	1085.28	1158.4
ENSG00000116017.10	1277.57	0.0973934	0.0232164	4.19502	2.7285e-05	0.000535728	1.06984	ARID3A	protein_coding	1268.22	1400.98
ENSG00000176715.16	1563.87	-0.0554842	0.0132264	-4.19494	2.72938e-05	0.000535728	0.962271	ACSF3	protein_coding	1712.31	1668.82
ENSG00000112941.13	622.428	-0.0676056	0.0161201	-4.19387	2.74236e-05	0.000537943	0.95422	TENT4A	protein_coding	691.064	666.234
ENSG00000187049.9	192.502	0.0657652	0.0156823	4.1936	2.74561e-05	0.000538251	1.04664	TMEM216	protein_coding	201.009	211.314
ENSG00000246363.2	50.7571	0.233171	0.0556071	4.19318	2.75067e-05	0.000538912	1.17542	LINC02458	lincRNA	50.8562	59.0342
ENSG00000141447.17	340.831	0.0867271	0.0206842	4.19292	2.75385e-05	0.000539195	1.06196	OSBPL1A	protein_coding	350.108	379.363
ENSG00000114982.17	996.714	-0.06769	0.0161444	-4.19279	2.75549e-05	0.000539195	0.954165	KANSL3	protein_coding	1113.39	1088.77
ENSG00000164080.13	1096.05	-0.0539302	0.0128653	-4.19191	2.76622e-05	0.000540962	0.963308	RAD54L2	protein_coding	1218.58	1190.03
ENSG00000140199.11	7975.23	0.0793948	0.0189414	4.19161	2.76982e-05	0.000541164	1.05657	SLC12A6	protein_coding	8245.55	8914.66
ENSG00000275371.1	55.1862	0.133773	0.031915	4.19154	2.77064e-05	0.000541164	1.09716	AC012645.4	antisense	54.3562	61.0711
ENSG00000242880.1	10.8107	-0.107423	0.0256323	-4.19091	2.77841e-05	0.000542349	0.928245	AC046136.1	lincRNA	12.3872	11.575
ENSG00000168781.22	418.454	-0.0716041	0.0170907	-4.18965	2.7939e-05	0.000545042	0.951579	PPIP5K1	protein_coding	469.757	452.543
ENSG00000229124.6	856.177	0.083617	0.0199599	4.18925	2.79882e-05	0.000545668	1.05967	VIM-AS1	antisense	894.971	960.545
ENSG00000270149.5	100.091	0.140356	0.0335063	4.18895	2.80243e-05	0.000546037	1.10218	AL591806.3	protein_coding	101.918	112.363
ENSG00000103196.11	2899.3	0.153256	0.036592	4.18823	2.8114e-05	0.000547451	1.11208	CRISPLD2	protein_coding	2819.01	3217.51
ENSG00000148926.9	1155.63	0.163878	0.039139	4.18708	2.82563e-05	0.000549887	1.12029	ADM	protein_coding	1151.54	1275.74
ENSG00000121807.5	3232.3	0.111658	0.0266729	4.18619	2.8368e-05	0.000551701	1.08047	CCR2	protein_coding	3353.44	3669.29
ENSG00000281938.1	13.2298	-0.283788	0.0677946	-4.18599	2.83928e-05	0.000551701	0.821432	AC026398.1	protein_coding	16.3097	13.2618
ENSG00000167461.11	1259	0.0665482	0.0158983	4.18588	2.84066e-05	0.000551701	1.04721	RAB8A	protein_coding	1306.65	1389.37
ENSG00000206838.1	162.925	0.148682	0.0355208	4.18578	2.84186e-05	0.000551701	1.10856	SNORA5A	snoRNA	168.228	185.895
ENSG00000235304.1	24.1138	-0.136528	0.0326204	-4.18536	2.84717e-05	0.000552395	0.909706	LINC01281	lincRNA	28.6881	25.1513
ENSG00000167985.6	815.446	0.0405511	0.00969012	4.18479	2.85432e-05	0.000553447	1.02851	SDHAF2	protein_coding	865.358	900.846
ENSG00000164924.17	12686.9	0.061239	0.0146386	4.1834	2.87183e-05	0.000556504	1.04336	YWHAZ	protein_coding	13404.3	14079.2
ENSG00000162711.17	1233	0.0925095	0.0221191	4.18234	2.88518e-05	0.000558753	1.06622	NLRP3	protein_coding	1269.85	1391.53
ENSG00000085117.11	1342.21	0.0922772	0.0220722	4.18069	2.90624e-05	0.00056249	1.06605	CD82	protein_coding	1364.24	1483.78
ENSG00000160999.10	216.601	0.122269	0.0292526	4.17975	2.91827e-05	0.000564477	1.08845	SH2B2	protein_coding	210.613	230.946
ENSG00000116729.13	1490.12	0.183804	0.0439864	4.17867	2.93221e-05	0.000566829	1.13588	WLS	protein_coding	1459.7	1711.38
ENSG00000242134.2	43.3541	-0.137865	0.0329938	-4.17851	2.93422e-05	0.000566874	0.908863	RPL5P13	processed_pseudogene	51.5708	46.4316
ENSG00000153179.12	4304.63	0.0766944	0.0183591	4.17746	2.94787e-05	0.000569167	1.0546	RASSF3	protein_coding	4453.4	4815.81
ENSG00000272418.1	10.0067	-0.197548	0.0472947	-4.17696	2.95428e-05	0.00057006	0.872031	AC090607.4	sense_intronic	12.4602	10.7658
ENSG00000166681.13	247.216	0.147333	0.0352888	4.17506	2.97906e-05	0.000574495	1.10752	BEX3	protein_coding	251.022	272.25
ENSG00000168904.14	409.294	-0.0516695	0.0123768	-4.1747	2.98385e-05	0.000575071	0.964819	LRRC28	protein_coding	457.323	444.286
ENSG00000231485.1	107.302	0.0908791	0.0217704	4.17444	2.98723e-05	0.000575376	1.06502	AL357078.1	lincRNA	108.075	118.483
ENSG00000102780.16	947.832	-0.0717024	0.0171789	-4.17386	2.99483e-05	0.000576492	0.951515	DGKH	protein_coding	1094.34	1021.71
ENSG00000283782.2	279.823	-0.0942055	0.0225725	-4.17346	3.00004e-05	0.000577145	0.936788	AC116366.3	protein_coding	324.02	304.976
ENSG00000176170.13	126.2	0.115712	0.0277286	4.17304	3.00558e-05	0.000577864	1.08351	SPHK1	protein_coding	124.675	138.257
ENSG00000117984.13	2726.75	0.1135	0.0272055	4.17196	3.01993e-05	0.000580274	1.08185	CTSD	protein_coding	2662.03	2988.06
ENSG00000203804.4	1195.96	0.110692	0.0265341	4.17169	3.02349e-05	0.000580608	1.07975	ADAMTSL4-AS1	processed_transcript	1200.69	1324.75
ENSG00000267254.5	53.0371	-0.0942686	0.0226036	-4.1705	3.03929e-05	0.000583292	0.936747	ZNF790-AS1	antisense	60.0332	56.1868
ENSG00000262470.2	3.79674	-0.180745	0.0433448	-4.16994	3.04686e-05	0.000584392	0.882247	TVP23CP2	processed_pseudogene	4.47345	3.96184
ENSG00000164144.15	1571.45	0.0967159	0.0231993	4.16892	3.06045e-05	0.000586648	1.06934	ARFIP1	protein_coding	1628.57	1789.25
ENSG00000256751.5	76.7362	0.140769	0.0337687	4.16862	3.06444e-05	0.000587059	1.10249	PLBD1-AS1	antisense	75.6261	87.8421
ENSG00000107077.18	3198.31	-0.0591721	0.0142002	-4.167	3.08634e-05	0.000590612	0.959815	KDM4C	protein_coding	3629.5	3499.3
ENSG00000285676.1	24.2314	-0.167676	0.0402399	-4.16692	3.08749e-05	0.000590612	0.890276	AL158212.5	antisense	26.177	24.6671
ENSG00000237300.2	2.30032	-0.2281	0.0547418	-4.16684	3.08853e-05	0.000590612	0.853758	MTCO1P19	processed_pseudogene	2.83628	2.45789
ENSG00000233343.1	15.6785	0.0901555	0.0216417	4.16583	3.10226e-05	0.000592564	1.06448	ATP6V1G1P4	processed_pseudogene	16.5088	17.6842
ENSG00000275638.1	20.8197	-0.0762188	0.0182963	-4.16581	3.10245e-05	0.000592564	0.94854	AC011939.3	antisense	24.3739	22.8737
ENSG00000072864.14	1937.66	0.0869575	0.0208756	4.1655	3.10667e-05	0.000593016	1.06213	NDE1	protein_coding	1965.11	2130.65
ENSG00000120709.10	1502.51	0.105065	0.0252264	4.16486	3.11543e-05	0.000594333	1.07554	FAM53C	protein_coding	1536.5	1703.52
ENSG00000086544.2	245.18	0.0637271	0.0153036	4.16419	3.1246e-05	0.000595725	1.04516	ITPKC	protein_coding	253.168	269.851
ENSG00000188906.15	35579.2	0.112823	0.0271027	4.16281	3.14355e-05	0.000598981	1.08134	LRRK2	protein_coding	36750.1	40668.1
ENSG00000111653.19	638.716	0.0722125	0.0173595	4.15982	3.18498e-05	0.000606514	1.05133	ING4	protein_coding	674.097	719.445
ENSG00000111786.8	2006.21	0.0569617	0.0136945	4.15946	3.19007e-05	0.000607122	1.04027	SRSF9	protein_coding	2131.22	2270.09
ENSG00000154309.8	116.639	-0.0710097	0.0170771	-4.15819	3.20777e-05	0.000609878	0.951972	DISP1	protein_coding	130.617	125.254
ENSG00000231327.1	14.1789	0.0967768	0.0232747	4.15803	3.2101e-05	0.000609878	1.06938	LINC01816	lincRNA	13.9735	15.4842
ENSG00000196696.12	569.032	-0.092706	0.0222958	-4.15801	3.21029e-05	0.000609878	0.937762	PDXDC2P-NPIPB14P	processed_transcript	639.274	614.668
ENSG00000162599.15	352.863	-0.0924365	0.0222337	-4.1575	3.21751e-05	0.000610728	0.937937	NFIA	protein_coding	385.285	374.505
ENSG00000206756.1	11.7368	-0.167843	0.0403719	-4.15742	3.21858e-05	0.000610728	0.890173	RF00019	misc_RNA	14.0354	12.4487
ENSG00000103415.11	754.958	0.0560897	0.0134945	4.15649	3.23174e-05	0.000612861	1.03964	HMOX2	protein_coding	793.58	836.77
ENSG00000256351.1	11.6751	-0.104725	0.0251983	-4.15604	3.23814e-05	0.000613709	0.929982	AC007834.2	processed_pseudogene	12.7611	12.1211
ENSG00000236474.1	15.658	-0.0884132	0.021281	-4.15457	3.25903e-05	0.000617302	0.940557	GCNT1P1	processed_pseudogene	17.865	17.0224
ENSG00000120254.15	78.2817	-0.108361	0.0260842	-4.15427	3.26327e-05	0.000617739	0.927641	MTHFD1L	protein_coding	88.5487	82.5158
ENSG00000155111.14	1697.9	0.0761933	0.0183423	4.15396	3.26772e-05	0.000618214	1.05423	CDK19	protein_coding	1767.15	1919.07
ENSG00000155097.11	1275.83	0.0602475	0.0145122	4.15152	3.30272e-05	0.000624466	1.04264	ATP6V1C1	protein_coding	1354.21	1418.71
ENSG00000113575.9	2486.75	0.0708776	0.0170917	4.1469	3.37004e-05	0.000636817	1.05036	PPP2CA	protein_coding	2626.66	2789.95
ENSG00000172878.13	83.8708	-0.0914609	0.0220567	-4.14663	3.37404e-05	0.000637198	0.938572	METAP1D	protein_coding	97.3009	89.8013
ENSG00000269125.1	3.28787	-0.192249	0.0463893	-4.14425	3.40923e-05	0.000643456	0.87524	AL137002.1	antisense	3.90708	3.43158
ENSG00000117859.18	2021.56	0.0524828	0.0126644	4.14412	3.41121e-05	0.000643456	1.03705	OSBPL9	protein_coding	2133.59	2266.66
ENSG00000204569.9	1560.26	0.0683369	0.0164906	4.14398	3.41333e-05	0.000643475	1.04851	PPP1R10	protein_coding	1624.56	1721.23
ENSG00000163406.10	478.242	-0.092498	0.0223275	-4.14279	3.43112e-05	0.000646448	0.937897	SLC15A2	protein_coding	547.259	523.942
ENSG00000167470.12	1066.58	0.109751	0.026497	4.14203	3.44249e-05	0.000648208	1.07904	MIDN	protein_coding	1055.35	1165.49
ENSG00000185033.14	760.69	0.104955	0.0253453	4.141	3.45793e-05	0.000650731	1.07546	SEMA4B	protein_coding	759.633	830.126
ENSG00000278768.2	148.582	-0.0922251	0.0222721	-4.14084	3.46034e-05	0.000650801	0.938075	BACE1-AS	processed_transcript	167.438	158.413
ENSG00000129292.20	7023.02	0.0896983	0.0216646	4.14032	3.46821e-05	0.000651853	1.06415	PHF20L1	protein_coding	7387.6	7992.77
ENSG00000135506.15	1667.2	0.0758043	0.0183093	4.1402	3.47002e-05	0.000651853	1.05395	OS9	protein_coding	1726.18	1871.41
ENSG00000145743.15	439.646	-0.0602588	0.0145599	-4.13869	3.49297e-05	0.000655779	0.959092	FBXL17	protein_coding	488.325	477.313
ENSG00000199691.1	22.2916	-0.0740296	0.0178904	-4.13796	3.50403e-05	0.000657468	0.949981	RN7SKP173	misc_RNA	25.3319	24.1684
ENSG00000140287.10	219.507	0.311866	0.0753748	4.13753	3.51068e-05	0.000658329	1.24131	HDC	protein_coding	208.429	256.918
ENSG00000163602.10	2564.25	0.076278	0.0184404	4.13646	3.52711e-05	0.000661023	1.05429	RYBP	protein_coding	2712.77	2896.29
ENSG00000185909.14	211.649	0.141341	0.034171	4.13628	3.52976e-05	0.000661131	1.10293	KLHDC8B	protein_coding	210.98	237.83
ENSG00000164251.4	839.65	0.149004	0.0360468	4.13364	3.57055e-05	0.000668082	1.1088	F2RL1	protein_coding	837.717	943.3
ENSG00000146457.15	3726.76	0.0718933	0.0173924	4.13361	3.57105e-05	0.000668082	1.0511	WTAP	protein_coding	3917.03	4159.93
ENSG00000150347.15	1669.92	-0.0769169	0.018609	-4.13333	3.57551e-05	0.000668525	0.948082	ARID5B	protein_coding	1907.08	1783.03
ENSG00000272097.1	11.9765	-0.102123	0.0247167	-4.13175	3.60015e-05	0.000672738	0.931661	AL024498.1	lincRNA	13.219	12.5829
ENSG00000151150.21	1589.39	-0.10826	0.0262046	-4.13133	3.60667e-05	0.000673561	0.927706	ANK3	protein_coding	1859.83	1686.21
ENSG00000139323.13	1206.44	-0.0604804	0.0146401	-4.13115	3.60946e-05	0.000673688	0.958945	POC1B	protein_coding	1324.87	1296.02
ENSG00000010270.13	733.592	0.0668463	0.0161916	4.12845	3.6521e-05	0.000680943	1.04742	STARD3NL	protein_coding	761.923	823.778
ENSG00000075426.11	3595.74	0.105541	0.0255645	4.12842	3.65259e-05	0.000680943	1.0759	FOSL2	protein_coding	3632.95	4023.55
ENSG00000180891.12	251.306	0.106164	0.0257181	4.128	3.6593e-05	0.000681796	1.07636	CUEDC1	protein_coding	247.602	278.551
ENSG00000228495.1	39.1379	-0.214803	0.052044	-4.12733	3.67e-05	0.000683391	0.861664	LINC01013	lincRNA	46.4381	40.0605
ENSG00000112078.13	3286.65	0.0627845	0.0152139	4.12679	3.67863e-05	0.000684598	1.04448	KCTD20	protein_coding	3434.28	3660.96
ENSG00000172531.14	1587.34	0.0820816	0.0198906	4.12665	3.6808e-05	0.000684604	1.05854	PPP1CA	protein_coding	1643.38	1765.58
ENSG00000126581.12	2355.92	0.0582248	0.0141115	4.12605	3.69045e-05	0.000685808	1.04118	BECN1	protein_coding	2453.55	2615.94
ENSG00000134686.18	1769.45	0.137619	0.0333542	4.12598	3.69157e-05	0.000685808	1.10009	PHC2	protein_coding	1739.75	1999.66
ENSG00000259318.1	33.1182	-0.0612813	0.0148552	-4.12524	3.70355e-05	0.000687633	0.958413	AL356801.1	processed_pseudogene	36.3628	35.1526
ENSG00000277701.4	811.065	-0.0771369	0.0187037	-4.12416	3.7209e-05	0.000690454	0.947937	AC159540.2	lincRNA	932.471	879.543
ENSG00000239247.3	10.9645	-0.106726	0.0258801	-4.12388	3.72547e-05	0.0006909	0.928693	RN7SL589P	misc_RNA	12.0155	11.5513
ENSG00000270426.1	463.291	0.0749496	0.0181764	4.12345	3.73239e-05	0.000691781	1.05332	AC099343.2	sense_intronic	492.212	525.387
ENSG00000116044.15	2031.9	0.0638812	0.0154952	4.12264	3.74553e-05	0.000693752	1.04527	NFE2L2	protein_coding	2131.6	2247.23
ENSG00000251393.3	6.8943	0.138329	0.0335543	4.12253	3.74737e-05	0.000693752	1.10063	AC005280.1	processed_transcript	6.67478	7.59605
ENSG00000173230.15	4172.06	0.0694035	0.0168389	4.12162	3.76212e-05	0.000696079	1.04928	GOLGB1	protein_coding	4406.12	4686.74
ENSG00000263220.1	11.7464	-0.101901	0.0247258	-4.12125	3.76816e-05	0.000696793	0.931804	AC015727.1	antisense	13.4712	12.3724
ENSG00000160685.13	1798.61	0.0872616	0.0211889	4.11826	3.81747e-05	0.000705502	1.06235	ZBTB7B	protein_coding	1819.23	1980.32
ENSG00000006712.14	257.938	0.0715724	0.0173881	4.11618	3.85204e-05	0.000711481	1.05086	PAF1	protein_coding	270.265	286.771
ENSG00000261098.1	294.685	-0.0968965	0.0235443	-4.11549	3.86352e-05	0.000713188	0.935042	AP000766.1	lincRNA	338.639	320.455
ENSG00000149798.4	197.366	0.149225	0.0362681	4.1145	3.88012e-05	0.000715702	1.10897	CDC42EP2	protein_coding	192.546	217.257
ENSG00000023892.10	3391.14	0.0609199	0.0148065	4.11442	3.88162e-05	0.000715702	1.04313	DEF6	protein_coding	3517.17	3732.25
ENSG00000156398.12	364.738	-0.0684766	0.0166446	-4.11405	3.88782e-05	0.00071643	0.953644	SFXN2	protein_coding	398.226	384.157
ENSG00000263648.1	68.0949	0.104189	0.025327	4.11376	3.89265e-05	0.000716613	1.07489	AC005244.1	processed_pseudogene	70.4845	77.7303
ENSG00000136810.12	680.443	0.141898	0.0344939	4.11372	3.8933e-05	0.000716613	1.10336	TXN	protein_coding	686.978	767.42
ENSG00000112658.7	467.753	0.0606201	0.0147372	4.11341	3.89858e-05	0.000717173	1.04291	SRF	protein_coding	488.507	517.922
ENSG00000165672.6	1349.8	0.0761784	0.0185208	4.11314	3.9032e-05	0.000717609	1.05422	PRDX3	protein_coding	1418.92	1522.71
ENSG00000089234.15	1129.74	0.0594725	0.0144598	4.11295	3.90641e-05	0.000717787	1.04208	BRAP	protein_coding	1181.73	1247.43
ENSG00000174579.3	3384.15	0.0415146	0.0100976	4.11132	3.93399e-05	0.000722127	1.02919	MSL2	protein_coding	3602.49	3739.77
ENSG00000188897.9	1622.34	0.182789	0.0444602	4.11129	3.93455e-05	0.000722127	1.13508	AC099489.1	protein_coding	1572.57	1814.78
ENSG00000164332.7	685.67	0.0879292	0.0213885	4.11106	3.9385e-05	0.000722436	1.06284	UBLCP1	protein_coding	713.976	759.808
ENSG00000179715.12	410.655	-0.0985953	0.0239933	-4.10929	3.9688e-05	0.000727575	0.933942	PCED1B	protein_coding	475.124	426.687
ENSG00000137656.11	426.16	0.0504109	0.0122682	4.10906	3.97265e-05	0.000727863	1.03556	BUD13	protein_coding	449.429	472.121
ENSG00000113312.10	801.43	0.0692904	0.016866	4.10828	3.98614e-05	0.000729915	1.0492	TTC1	protein_coding	844.783	894.27
ENSG00000159885.13	103.701	0.104179	0.0253617	4.10771	3.99604e-05	0.00073131	1.07488	ZNF222	protein_coding	108.029	116.53
ENSG00000163719.19	2017.44	0.0484947	0.0118134	4.10505	4.04222e-05	0.00073919	1.03419	MTMR14	protein_coding	2112.99	2238.32
ENSG00000058673.16	7296.45	0.0694248	0.0169124	4.10497	4.04373e-05	0.00073919	1.0493	ZC3H11A	protein_coding	7660.58	8109.49
ENSG00000254634.4	175.162	-0.158651	0.0386525	-4.10455	4.05096e-05	0.000740089	0.895862	SMG1P6	unprocessed_pseudogene	209.885	190.3
ENSG00000101558.13	3884.87	0.0699974	0.0170561	4.10395	4.06154e-05	0.000741178	1.04971	VAPA	protein_coding	4090.26	4329.81
ENSG00000233509.2	15.0457	-0.0904785	0.0220467	-4.10395	4.06157e-05	0.000741178	0.939211	ZNF197-AS1	antisense	16.5398	15.9908
ENSG00000272040.1	68.3964	-0.0747885	0.0182244	-4.10375	4.06498e-05	0.000741377	0.949481	AC010245.2	lincRNA	78.2301	75.4645
ENSG00000114999.7	907.625	-0.0638218	0.015553	-4.1035	4.06943e-05	0.000741575	0.956726	TTL	protein_coding	989.345	972.512
ENSG00000274266.1	13168.7	0.174556	0.042539	4.10343	4.07071e-05	0.000741575	1.12862	SNORA73A	snoRNA	13347	15402.3
ENSG00000136754.17	4224.47	0.0718611	0.0175168	4.1024	4.08888e-05	0.000744182	1.05107	ABI1	protein_coding	4483.25	4754.62
ENSG00000228423.2	7.0529	-0.133319	0.0324981	-4.10235	4.08968e-05	0.000744182	0.911732	AL357552.2	lincRNA	7.78319	7.20395
ENSG00000242616.3	1488.05	0.167766	0.0409109	4.10077	4.11785e-05	0.000748881	1.12332	GNG10	protein_coding	1514.44	1691.26
ENSG00000268170.2	131.513	0.14739	0.0359553	4.09925	4.14487e-05	0.000753365	1.10756	AC073342.2	antisense	134.71	150.661
ENSG00000267430.1	305.323	0.0681027	0.0166143	4.09904	4.14876e-05	0.00075337	1.04834	AC036176.2	processed_pseudogene	321.715	343.822
ENSG00000280287.1	263.439	-0.149078	0.0363695	-4.09899	4.14961e-05	0.00075337	0.901827	AC131212.3	TEC	300.159	274.891
ENSG00000273899.4	448.068	0.0567632	0.013858	4.09606	4.20243e-05	0.000762393	1.04013	NOL12	protein_coding	466.442	494.958
ENSG00000251455.1	20.6622	-0.146122	0.0356745	-4.09597	4.20408e-05	0.000762393	0.903676	AC092611.1	antisense	23.1283	21.3276
ENSG00000147437.9	96.2105	-0.102361	0.024993	-4.09557	4.21134e-05	0.000763275	0.931508	GNRH1	protein_coding	106.157	101.126
ENSG00000082805.19	1193.37	-0.0685538	0.0167476	-4.09335	4.25178e-05	0.000770168	0.953593	ERC1	protein_coding	1343.22	1295.35
ENSG00000133048.12	1765.49	0.20269	0.0495206	4.09304	4.25749e-05	0.000770764	1.15084	CHI3L1	protein_coding	1655.22	2024.18
ENSG00000171314.8	1814.38	0.0723053	0.0176678	4.09249	4.26757e-05	0.000772153	1.0514	PGAM1	protein_coding	1884.5	2017.66
ENSG00000253005.1	4.94671	0.163204	0.0398893	4.09143	4.28721e-05	0.000775267	1.11977	RNU6-176P	snRNA	4.68363	5.32895
ENSG00000110719.9	2879.08	0.108769	0.0265998	4.08908	4.33087e-05	0.000782718	1.07831	TCIRG1	protein_coding	2854.13	3163.21
ENSG00000108578.14	491.957	-0.056016	0.0137017	-4.08825	4.3464e-05	0.000785081	0.961917	BLMH	protein_coding	553.031	534.938
ENSG00000138942.15	663.582	0.0541741	0.013252	4.08798	4.35139e-05	0.000785537	1.03826	RNF185	protein_coding	695.741	737.729
ENSG00000164603.11	765.154	0.097477	0.023853	4.08657	4.37789e-05	0.000789875	1.0699	BMT2	protein_coding	799.458	861.075
ENSG00000275772.1	16.6068	-0.18955	0.0463896	-4.08605	4.38781e-05	0.000791218	0.876879	AC244157.2	processed_pseudogene	19.7323	17.3671
ENSG00000080371.5	2665.18	0.0494499	0.0121038	4.0855	4.39822e-05	0.000792538	1.03487	RAB21	protein_coding	2843.77	2982.25
ENSG00000254087.7	8960.32	0.0893707	0.0218756	4.0854	4.40009e-05	0.000792538	1.06391	LYN	protein_coding	9252.51	10112.1
ENSG00000099725.14	985.217	-0.110418	0.027035	-4.08425	4.42195e-05	0.000795285	0.92632	PRKY	transcribed_unprocessed_pseudogene	854.989	1203.33
ENSG00000198830.10	3749.85	0.0691419	0.016929	4.08422	4.42249e-05	0.000795285	1.04909	HMGN2	protein_coding	3940.27	4193.32
ENSG00000213859.5	119.333	0.0822874	0.0201477	4.0842	4.42281e-05	0.000795285	1.0587	KCTD11	protein_coding	122.166	131.683
ENSG00000160208.12	480.587	-0.0671507	0.0164514	-4.08175	4.46972e-05	0.000803267	0.954521	RRP1B	protein_coding	539.887	513.083
ENSG00000258819.1	416.874	0.177867	0.0435824	4.08116	4.48113e-05	0.000804864	1.13121	LINC02289	lincRNA	398.628	471.926
ENSG00000100056.11	454.497	0.0568306	0.0139256	4.081	4.48418e-05	0.000804959	1.04018	ESS2	protein_coding	472.996	499.829
ENSG00000171522.5	1798.22	0.0708234	0.0173557	4.08071	4.48982e-05	0.000805519	1.05032	PTGER4	protein_coding	1856.58	1983.86
ENSG00000131023.12	1277.47	-0.0496849	0.0121767	-4.08033	4.49722e-05	0.000806394	0.966147	LATS1	protein_coding	1415.32	1381.44
ENSG00000238365.3	4.86781	-0.156447	0.0383479	-4.07966	4.51011e-05	0.000808251	0.897232	RNU7-57P	snRNA	5.63717	5.08816
ENSG00000176597.11	499.547	0.119175	0.0292131	4.07951	4.513e-05	0.000808315	1.08611	B3GNT5	protein_coding	500.646	559.939
ENSG00000108932.11	927.834	0.0695884	0.0170597	4.07912	4.52063e-05	0.000809227	1.04942	SLC16A6	protein_coding	968.066	1048.9
ENSG00000149269.9	2393.1	0.0840766	0.0206173	4.07795	4.54336e-05	0.000812681	1.06001	PAK1	protein_coding	2473.81	2709.81
ENSG00000012174.11	254.077	-0.064148	0.0157308	-4.07787	4.54501e-05	0.000812681	0.95651	MBTPS2	protein_coding	288.137	277.311
ENSG00000168310.10	1922.01	0.0620416	0.01522	4.07631	4.57563e-05	0.000817656	1.04394	IRF2	protein_coding	2011.42	2131.9
ENSG00000125780.11	87.3633	0.200291	0.0491404	4.07589	4.58381e-05	0.000817656	1.14893	TGM3	protein_coding	84.1571	98.8566
ENSG00000281005.1	787.756	0.0745419	0.0182888	4.07583	4.58499e-05	0.000817656	1.05303	LINC00921	lincRNA	795.15	860.564
ENSG00000114853.13	302.138	0.0991215	0.0243195	4.07581	4.58541e-05	0.000817656	1.07112	ZBTB47	protein_coding	300.354	330.659
ENSG00000143933.16	8430.46	0.104951	0.0257499	4.0758	4.58563e-05	0.000817656	1.07546	CALM2	protein_coding	8787.55	9617.92
ENSG00000119318.12	3005.58	0.0725689	0.0178059	4.07556	4.59045e-05	0.000818058	1.05159	RAD23B	protein_coding	3109.24	3341.41
ENSG00000239718.1	12.3252	-0.177005	0.043442	-4.07452	4.61102e-05	0.000821266	0.884537	HLTF-AS1	antisense	14.5664	12.9474
ENSG00000248240.1	6.93565	-0.132296	0.0324743	-4.07385	4.62419e-05	0.000823153	0.912379	AC114956.1	antisense	7.76549	7.21842
ENSG00000002330.13	286.466	0.0904303	0.0221985	4.0737	4.62712e-05	0.000823215	1.06469	BAD	protein_coding	286.261	312.393
ENSG00000243716.10	2597.98	-0.11827	0.0290484	-4.07148	4.67154e-05	0.000830361	0.921292	NPIPB5	protein_coding	2912.54	2759.61
ENSG00000157350.12	2377.56	0.0713066	0.0175139	4.07143	4.67248e-05	0.000830361	1.05067	ST3GAL2	protein_coding	2419.47	2578.5
ENSG00000200999.1	7.77852	-0.121878	0.0299435	-4.07028	4.6956e-05	0.000833885	0.91899	RF00284	snoRNA	9.03319	8.41053
ENSG00000248774.1	65.2618	0.111043	0.0272819	4.07019	4.69754e-05	0.000833885	1.08001	AC097534.1	antisense	67.5066	73.6224
ENSG00000101460.12	72.937	0.14569	0.0357999	4.06956	4.71026e-05	0.000835678	1.10626	MAP1LC3A	protein_coding	70.9093	81.5816
ENSG00000156650.13	1960.34	-0.0463759	0.0113966	-4.06928	4.71585e-05	0.000836205	0.968366	KAT6B	protein_coding	2170.94	2121.73
ENSG00000109920.12	2862.85	-0.0525011	0.0129073	-4.06754	4.75128e-05	0.000842021	0.964263	FNBP4	protein_coding	3218.91	3120.49
ENSG00000132478.9	366.757	-0.0660271	0.0162392	-4.06591	4.78461e-05	0.00084727	0.955265	UNK	protein_coding	405.027	391.428
ENSG00000166825.13	927.424	0.174802	0.042993	4.06583	4.78621e-05	0.00084727	1.12881	ANPEP	protein_coding	884.327	1037.09
ENSG00000176014.12	136.481	-0.152676	0.0375532	-4.06559	4.79113e-05	0.000847672	0.89958	TUBB6	protein_coding	153.743	141.037
ENSG00000273382.1	103.022	0.0936664	0.0230398	4.06542	4.79465e-05	0.000847825	1.06708	AL356488.3	antisense	104.876	114.749
ENSG00000176783.14	1944.55	0.0887212	0.0218244	4.06522	4.79866e-05	0.000848064	1.06343	RUFY1	protein_coding	2019.97	2136.46
ENSG00000233382.6	231.977	-0.0667913	0.0164328	-4.06452	4.81321e-05	0.000850166	0.954759	NKAPP1	transcribed_processed_pseudogene	262.308	252.563
ENSG00000126391.13	680.688	0.0755363	0.0185911	4.06305	4.84364e-05	0.000855067	1.05375	FRMD8	protein_coding	695.535	744.742
ENSG00000090316.15	1574.53	0.0730126	0.017976	4.06166	4.87243e-05	0.000859674	1.05191	MAEA	protein_coding	1597.9	1720.44
ENSG00000106526.10	386.957	-0.0693637	0.0170797	-4.06118	4.88258e-05	0.000860551	0.953058	ACTR3C	protein_coding	435.334	421.389
ENSG00000219712.1	85.2503	-0.120233	0.0296055	-4.06117	4.88279e-05	0.000860551	0.920039	AL357054.1	processed_pseudogene	98.8186	93.2197
ENSG00000131759.17	1013.8	0.111215	0.027389	4.06059	4.8949e-05	0.00086221	1.08014	RARA	protein_coding	999.473	1101.2
ENSG00000159377.10	2148.87	0.0781339	0.0192439	4.06019	4.90328e-05	0.00086321	1.05565	PSMB4	protein_coding	2254.04	2407.46
ENSG00000166337.9	1565.4	0.0635446	0.0156512	4.06004	4.90649e-05	0.000863298	1.04503	TAF10	protein_coding	1595.88	1697.52
ENSG00000160888.6	1726.21	0.0850202	0.0209438	4.05943	4.91917e-05	0.000865053	1.0607	IER2	protein_coding	1758.18	1906.93
ENSG00000222365.1	105.442	0.107499	0.0264825	4.05924	4.92333e-05	0.000865308	1.07736	SNORD12B	snoRNA	107.582	119.292
ENSG00000127951.6	18590.3	0.126426	0.0311501	4.05862	4.93636e-05	0.000867121	1.09159	FGL2	protein_coding	18988.3	21251.3
ENSG00000179820.15	1441.33	0.127523	0.0314232	4.05825	4.94409e-05	0.000867923	1.09242	MYADM	protein_coding	1377.7	1503.51
ENSG00000204650.14	592.271	-0.0617434	0.0152148	-4.05812	4.94689e-05	0.000867923	0.958106	LINC02210	transcribed_unitary_pseudogene	653.914	629.122
ENSG00000260647.1	20.9246	0.0769507	0.0189626	4.05802	4.94907e-05	0.000867923	1.05479	AC127537.1	antisense	21.4469	22.8974
ENSG00000112697.15	3736.39	0.0894994	0.0220616	4.0568	4.97499e-05	0.000871988	1.064	TMEM30A	protein_coding	3931.25	4246.8
ENSG00000205133.11	545.199	0.1012	0.0249517	4.05584	4.99541e-05	0.000875069	1.07267	TRIQK	protein_coding	560.613	614.317
ENSG00000275131.3	852.566	-0.081983	0.0202143	-4.05568	4.99879e-05	0.000875069	0.944758	AC241952.1	transcribed_unprocessed_pseudogene	982.162	912.879
ENSG00000158470.5	3174.51	0.112821	0.0278187	4.05559	5.00079e-05	0.000875069	1.08134	B4GALT5	protein_coding	3175.75	3561.29
ENSG00000248221.1	22.099	-0.139326	0.0343701	-4.05368	5.04173e-05	0.000881494	0.907944	STX18-IT1	sense_intronic	25.6726	23.9079
ENSG00000239305.6	1102.3	0.0508627	0.0125475	4.05362	5.04302e-05	0.000881494	1.03588	RNF103	protein_coding	1175.11	1235.45
ENSG00000128340.14	2098.76	0.0856759	0.0211403	4.05274	5.06222e-05	0.000884366	1.06118	RAC2	protein_coding	2128.8	2293.37
ENSG00000168216.11	2141.75	0.0854277	0.0210884	4.05093	5.10144e-05	0.00089073	1.061	LMBRD1	protein_coding	2255.61	2420.49
ENSG00000182541.17	3376.6	0.119865	0.029597	4.04992	5.12355e-05	0.000894101	1.08663	LIMK2	protein_coding	3433.31	3783.11
ENSG00000169895.5	1228.76	0.0506459	0.0125062	4.04966	5.12918e-05	0.000894594	1.03573	SYAP1	protein_coding	1298.94	1342.99
ENSG00000172425.10	12.8755	-0.0957759	0.0236564	-4.04863	5.15185e-05	0.000898058	0.935769	TTC36	protein_coding	14.4978	13.6855
ENSG00000176095.11	1070.32	0.0819131	0.020233	4.04848	5.1551e-05	0.000898134	1.05842	IP6K1	protein_coding	1095.89	1184.75
ENSG00000138336.8	123.92	-0.0839886	0.0207633	-4.04506	5.23104e-05	0.000910869	0.943446	TET1	protein_coding	140.865	132.876
ENSG00000251002.7	103.091	0.127116	0.0314299	4.04444	5.2449e-05	0.000912784	1.09211	AC244502.1	processed_transcript	106.699	115.946
ENSG00000256706.1	55.0918	0.112479	0.0278127	4.04417	5.25082e-05	0.000913317	1.08108	AC005342.2	antisense	55.5752	62.0237
ENSG00000159479.16	628.222	0.0510644	0.0126274	4.04392	5.25649e-05	0.000913806	1.03603	MED8	protein_coding	666.584	704.53
ENSG00000168288.12	1285.6	0.0983213	0.0243176	4.04322	5.27223e-05	0.000915764	1.07053	MMADHC	protein_coding	1354.51	1462.41
ENSG00000258355.1	7.48861	0.13073	0.0323336	4.04316	5.2735e-05	0.000915764	1.09485	AC079174.1	sense_intronic	7.15044	8.19605
ENSG00000161048.11	437.512	-0.0496507	0.0122857	-4.04133	5.31492e-05	0.000922456	0.96617	NAPEPLD	protein_coding	492.308	474.607
ENSG00000124203.6	1355.52	-0.0837896	0.0207381	-4.04037	5.33661e-05	0.000925717	0.943576	ZNF831	protein_coding	1534.51	1457.89
ENSG00000156052.10	4951.01	0.0788419	0.0195166	4.03973	5.35117e-05	0.000927239	1.05617	GNAQ	protein_coding	5142.44	5488.82
ENSG00000122547.10	597.525	0.107028	0.0264938	4.03973	5.35119e-05	0.000927239	1.07701	EEPD1	protein_coding	599.394	671.282
ENSG00000260711.2	550.646	-0.0994559	0.0246238	-4.03901	5.36762e-05	0.000929188	0.933385	AL121839.2	sense_intronic	637.436	595.283
ENSG00000204525.16	21895.5	0.21449	0.053105	4.03899	5.36826e-05	0.000929188	1.16029	HLA-C	protein_coding	20831.4	24957.5
ENSG00000258659.6	736.091	0.0729973	0.0180752	4.03853	5.37863e-05	0.00093048	1.0519	TRIM34	protein_coding	774.558	830.549
ENSG00000235833.1	128.471	-0.118632	0.0293836	-4.03736	5.40551e-05	0.000934244	0.92106	AC017099.1	processed_pseudogene	151.94	139.418
ENSG00000107651.12	773.151	-0.0370372	0.00917368	-4.03733	5.40624e-05	0.000934244	0.974654	SEC23IP	protein_coding	854.509	844.97
ENSG00000134058.11	333.91	0.0736303	0.0182489	4.03477	5.46558e-05	0.000943784	1.05236	CDK7	protein_coding	351.046	374.662
ENSG00000164038.14	196.666	-0.0731575	0.0181321	-4.03469	5.46736e-05	0.000943784	0.950555	SLC9B2	protein_coding	222.053	211.382
ENSG00000120705.12	1640.82	0.0681308	0.016888	4.03428	5.47688e-05	0.000944631	1.04836	ETF1	protein_coding	1717.03	1833.12
ENSG00000235290.1	96.363	0.185768	0.0460479	4.03423	5.47818e-05	0.000944631	1.13742	HLA-W	unprocessed_pseudogene	94.5553	110.313
ENSG00000280115.1	30.3608	-0.127856	0.0317036	-4.03286	5.51011e-05	0.000949623	0.91519	AC136603.1	TEC	34.6372	32.5434
ENSG00000127948.15	532.955	0.09535	0.0236482	4.03201	5.53011e-05	0.000952558	1.06832	POR	protein_coding	535.582	582.142
ENSG00000222370.1	4.8073	-0.156358	0.0387861	-4.0313	5.5469e-05	0.000954933	0.897287	SNORA36B	snoRNA	5.4292	5.00526
ENSG00000172650.13	172.445	-0.07496	0.0185959	-4.03099	5.55433e-05	0.000955699	0.949368	AGAP5	protein_coding	191.239	184.374
ENSG00000060749.15	1093.81	-0.0582301	0.014447	-4.03059	5.56379e-05	0.00095681	0.960442	QSER1	protein_coding	1210.87	1180.1
ENSG00000158716.8	194.029	0.0864569	0.0214521	4.03024	5.57211e-05	0.000957241	1.06176	DUSP23	protein_coding	199.562	216.264
ENSG00000005020.12	2285.33	0.111278	0.0276108	4.03023	5.57229e-05	0.000957241	1.08018	SKAP2	protein_coding	2348.73	2600.5
ENSG00000162408.10	719.799	-0.0516773	0.0128253	-4.02934	5.59338e-05	0.000960347	0.964814	NOL9	protein_coding	802.23	773.33
ENSG00000054392.12	151.098	-0.098991	0.0245698	-4.02897	5.6021e-05	0.000961327	0.933686	HHAT	protein_coding	173.739	164.054
ENSG00000179299.16	248.1	0.128156	0.031812	4.02855	5.61214e-05	0.000962534	1.0929	NSUN7	protein_coding	248.042	282.572
ENSG00000200502.1	27.481	-0.128723	0.0319553	-4.02823	5.61993e-05	0.000963351	0.914641	RF00019	misc_RNA	31.5133	29.0618
ENSG00000065613.13	3666.91	0.0938756	0.0233101	4.02724	5.64348e-05	0.00096687	1.06723	SLK	protein_coding	3853.63	4112.64
ENSG00000196352.15	5812.24	0.108539	0.0269544	4.02676	5.65517e-05	0.000968354	1.07814	CD55	protein_coding	5843.43	6498.33
ENSG00000223653.5	22.4865	-0.145773	0.0362045	-4.02637	5.66455e-05	0.00096944	0.903895	AL078459.1	antisense	25.5442	23.6053
ENSG00000169714.16	6926.32	0.077641	0.01929	4.02494	5.69899e-05	0.000974812	1.05529	CNBP	protein_coding	7243.68	7731.56
ENSG00000135127.11	244.469	-0.0857346	0.0213028	-4.02457	5.70806e-05	0.000975839	0.942305	BICDL1	protein_coding	274.973	257.599
ENSG00000136273.12	666.525	-0.0510187	0.0126792	-4.02382	5.72627e-05	0.000978429	0.965255	HUS1	protein_coding	742.602	725.874
ENSG00000166145.14	222.798	0.112845	0.0280505	4.02291	5.7483e-05	0.000981668	1.08136	SPINT1	protein_coding	221.438	245.588
ENSG00000261359.2	23.3733	0.0719975	0.0178987	4.0225	5.75834e-05	0.000982453	1.05117	PYCARD-AS1	antisense	23.9004	25.8013
ENSG00000201772.1	233.279	0.14721	0.0365968	4.02247	5.75905e-05	0.000982453	1.10743	SNORA5C	snoRNA	236.918	261.008
ENSG00000267249.1	55.9857	-0.045899	0.0114119	-4.02203	5.76986e-05	0.000983771	0.968686	AP005482.3	sense_intronic	61.2699	60.3184
ENSG00000261544.1	76.0663	-0.126772	0.0315312	-4.02053	5.80683e-05	0.000989548	0.915878	AC011939.2	sense_intronic	89.2013	82.1237
ENSG00000096063.15	2288.76	0.0982071	0.0244283	4.02021	5.81456e-05	0.000990093	1.07044	SRPK1	protein_coding	2352.02	2584.38
ENSG00000117222.13	1316.28	0.0478849	0.0119112	4.02014	5.81624e-05	0.000990093	1.03375	RBBP5	protein_coding	1404.28	1460.78
ENSG00000107874.10	234.903	0.0706823	0.0175833	4.01984	5.82369e-05	0.000990835	1.05021	CUEDC2	protein_coding	245.735	263.487
ENSG00000243280.2	16.7518	-0.0829208	0.0206291	-4.01961	5.82942e-05	0.000991281	0.944144	AC093663.2	processed_pseudogene	19.0465	18.0355
ENSG00000257594.3	1064.74	0.084265	0.0209653	4.01925	5.8383e-05	0.000992262	1.06015	GALNT4	protein_coding	1117.76	1203.56
ENSG00000280392.1	79.3986	-0.131865	0.0328118	-4.01884	5.84852e-05	0.000993471	0.912651	AC007496.3	TEC	90.865	84.4434
ENSG00000151883.17	12490.9	0.0717171	0.0178468	4.01848	5.85756e-05	0.000994478	1.05097	PARP8	protein_coding	13281.7	14160.2
ENSG00000140632.16	1552.11	0.0500614	0.0124593	4.01798	5.8698e-05	0.000996025	1.03531	GLYR1	protein_coding	1624.35	1720.68
ENSG00000168995.13	261.067	0.0990493	0.0246527	4.01779	5.87464e-05	0.000996318	1.07107	SIGLEC7	protein_coding	266.403	291.889
ENSG00000225300.1	427.388	-0.0815443	0.0202968	-4.01759	5.87963e-05	0.000996634	0.945045	AL591623.1	sense_intronic	485.42	457.55
ENSG00000141574.7	1960.2	0.13129	0.0326883	4.01643	5.90864e-05	0.00100056	1.09527	SECTM1	protein_coding	1929.26	2112.84
ENSG00000206784.1	13.6763	-0.0916238	0.0228123	-4.01641	5.90907e-05	0.00100056	0.938466	RF00019	misc_RNA	15.5796	14.6737
ENSG00000147044.21	1277.8	-0.0560905	0.0139688	-4.01542	5.93406e-05	0.00100426	0.961867	CASK	protein_coding	1445.43	1376.24
ENSG00000278259.4	583.119	-0.0569629	0.01419	-4.01429	5.96245e-05	0.00100853	0.961286	MYO19	protein_coding	642.575	629.476
ENSG00000143751.9	1367.89	0.0667013	0.016617	4.01403	5.96902e-05	0.0010086	1.04732	SDE2	protein_coding	1450.95	1526.72
ENSG00000232342.7	84.1352	-0.0881515	0.0219609	-4.01403	5.96919e-05	0.0010086	0.940727	AC022540.1	antisense	93.542	89.2737
ENSG00000184677.17	1661.74	-0.0593762	0.0148024	-4.01126	6.03968e-05	0.00101997	0.959679	ZBTB40	protein_coding	1875.03	1810.16
ENSG00000224626.1	8.46898	-0.114988	0.0286785	-4.00956	6.0832e-05	0.00102678	0.92339	AC106053.1	lincRNA	10.0243	9.17237
ENSG00000105810.9	1898.92	-0.073995	0.0184655	-4.0072	6.14426e-05	0.00103654	0.950004	CDK6	protein_coding	2194.65	2032.4
ENSG00000101096.19	1110.62	-0.0862941	0.0215365	-4.00687	6.15275e-05	0.00103695	0.941939	NFATC2	protein_coding	1250.31	1198.88
ENSG00000230101.5	2.61467	-0.206601	0.0515632	-4.00675	6.15593e-05	0.00103695	0.866576	TUBB3P2	processed_pseudogene	3.24779	2.68026
ENSG00000160410.14	1624.56	0.118813	0.0296532	4.00673	6.15645e-05	0.00103695	1.08584	SHKBP1	protein_coding	1601.25	1781.02
ENSG00000186074.18	948.112	0.086465	0.0215816	4.00643	6.16434e-05	0.00103773	1.06177	CD300LF	protein_coding	968.721	1069.68
ENSG00000196843.15	521.697	0.0913149	0.0227935	4.00619	6.17073e-05	0.00103826	1.06534	ARID5A	protein_coding	523.412	560.983
ENSG00000108587.15	947.863	-0.035865	0.00895326	-4.00581	6.18066e-05	0.00103894	0.975447	GOSR1	protein_coding	1041.21	1034.87
ENSG00000260148.1	4.97931	0.159314	0.0397711	4.00578	6.18125e-05	0.00103894	1.11676	AC009090.2	antisense	4.65044	5.53026
ENSG00000258922.1	38.2919	0.115971	0.028954	4.00535	6.1925e-05	0.00104028	1.0837	AC106028.2	sense_intronic	38.7235	42.6316
ENSG00000185101.12	384.945	-0.101863	0.0254359	-4.00471	6.20943e-05	0.00104258	0.931829	ANO9	protein_coding	436.816	403.274
ENSG00000135926.14	3407.3	0.0731863	0.0182766	4.00436	6.21857e-05	0.0010435	1.05204	TMBIM1	protein_coding	3510.95	3763.72
ENSG00000113648.16	8576.77	0.0576443	0.0143958	4.00425	6.22147e-05	0.0010435	1.04076	H2AFY	protein_coding	8911.46	9614.72
ENSG00000119844.15	2892.73	0.0712394	0.0177934	4.0037	6.23588e-05	0.00104537	1.05062	AFTPH	protein_coding	3052.18	3242.25
ENSG00000004059.10	506.039	0.0714125	0.0178381	4.00337	6.24473e-05	0.0010463	1.05074	ARF5	protein_coding	522.761	567.559
ENSG00000217624.2	15.069	-0.141497	0.0353537	-4.00231	6.27262e-05	0.00105043	0.906578	AL627402.1	processed_pseudogene	17.6925	15.775
ENSG00000209042.1	54.1022	0.136035	0.0339932	4.00182	6.28575e-05	0.00105207	1.09888	SNORD12C	snoRNA	54.3429	61.2487
ENSG00000265366.6	19.6599	-0.135732	0.0339194	-4.00159	6.29178e-05	0.00105253	0.910208	GLUD1P2	transcribed_unprocessed_pseudogene	22.5088	20.7855
ENSG00000083937.8	664.811	0.0979957	0.0245036	3.99924	6.35455e-05	0.00106247	1.07029	CHMP2B	protein_coding	692.15	746.236
ENSG00000276968.1	13.2144	-0.0934177	0.0233639	-3.99837	6.37801e-05	0.00106584	0.9373	AL158196.1	antisense	14.8695	14.0118
ENSG00000258365.1	38.0071	-0.13208	0.0330352	-3.99815	6.38399e-05	0.00106628	0.912515	AC073655.2	antisense	42.6261	39.125
ENSG00000131724.10	2715.15	0.0999004	0.0249892	3.99774	6.39503e-05	0.00106756	1.0717	IL13RA1	protein_coding	2807.65	3053.46
ENSG00000099810.19	1312.5	-0.0487213	0.0121884	-3.99733	6.40597e-05	0.00106883	0.966793	MTAP	protein_coding	1467.25	1422.18
ENSG00000264207.1	142.642	0.135827	0.0340019	3.99469	6.47802e-05	0.00108029	1.09872	AC239868.1	antisense	144.197	161.937
ENSG00000173930.8	979.616	0.0956872	0.023958	3.99395	6.49807e-05	0.00108293	1.06857	SLCO4C1	protein_coding	1001.35	1119.5
ENSG00000269489.1	15.2335	-0.0858894	0.0215054	-3.99386	6.50065e-05	0.00108293	0.942204	AL589765.6	lincRNA	17.5487	16.6618
ENSG00000198792.12	362.46	0.109851	0.0275058	3.99372	6.50435e-05	0.00108298	1.07912	TMEM184B	protein_coding	355.4	392.611
ENSG00000125744.11	79.1516	0.119213	0.0298546	3.99313	6.52069e-05	0.00108514	1.08614	RTN2	protein_coding	78.5288	86.1539
ENSG00000107968.9	1228.54	0.0551821	0.0138198	3.99296	6.52527e-05	0.00108534	1.03899	MAP3K8	protein_coding	1289.16	1368
ENSG00000101019.21	609.413	-0.0492578	0.0123371	-3.99265	6.53379e-05	0.0010861	0.966433	UQCC1	protein_coding	679.785	660.487
ENSG00000141956.13	394.359	-0.0605723	0.0151715	-3.99251	6.53767e-05	0.0010861	0.958884	PRDM15	protein_coding	437.075	423.793
ENSG00000251081.1	15.088	-0.141092	0.03534	-3.99243	6.54005e-05	0.0010861	0.906832	AC104663.1	lincRNA	17.5973	15.9895
ENSG00000242707.3	13.9832	-0.0894389	0.0224034	-3.9922	6.54626e-05	0.00108656	0.939888	RN7SL362P	misc_RNA	16.177	15.2566
ENSG00000108010.11	772.837	-0.0383477	0.00960639	-3.9919	6.55465e-05	0.00108739	0.97377	GLRX3	protein_coding	859.004	848.634
ENSG00000265669.1	18.4628	0.0793195	0.0198767	3.99057	6.59135e-05	0.00109291	1.05652	MIR548AJ1	miRNA	19.542	20.95
ENSG00000141682.11	301.918	0.137561	0.0344796	3.98963	6.61761e-05	0.00109618	1.10004	PMAIP1	protein_coding	299.836	339.818
ENSG00000114450.9	2579.95	0.0920652	0.0230762	3.98962	6.61795e-05	0.00109618	1.06589	GNB4	protein_coding	2685.95	2909.12
ENSG00000279342.2	192.512	-0.0714387	0.0179072	-3.98938	6.62466e-05	0.00109673	0.951688	AP000866.6	sense_intronic	218.606	208.258
ENSG00000178440.5	29.0458	-0.122397	0.0306823	-3.98918	6.63014e-05	0.00109707	0.91866	LINC00843	lincRNA	33.2898	30.7289
ENSG00000272689.1	12.0835	-0.0965846	0.0242132	-3.98892	6.63744e-05	0.0010977	0.935244	AC004832.4	sense_intronic	13.9071	13.0776
ENSG00000279836.1	9.76835	-0.107581	0.0269787	-3.98763	6.67359e-05	0.00110311	0.928143	AP002967.1	TEC	11.2942	10.4737
ENSG00000265666.1	222.622	0.128929	0.0323407	3.98658	6.70318e-05	0.00110743	1.09348	RARA-AS1	antisense	212.086	244.134
ENSG00000071553.16	570.972	0.06687	0.0167747	3.98635	6.70973e-05	0.00110794	1.04744	ATP6AP1	protein_coding	586.947	636.83
ENSG00000197943.9	4777.67	0.071994	0.0180608	3.9862	6.71388e-05	0.00110805	1.05117	PLCG2	protein_coding	4939.98	5375.13
ENSG00000233560.2	68.6018	-0.0794408	0.0199314	-3.98571	6.72794e-05	0.0011098	0.946424	KRT8P39	processed_pseudogene	76.7412	73.6816
ENSG00000068323.16	743.848	0.0938405	0.0235525	3.98431	6.76776e-05	0.00111541	1.06721	TFE3	protein_coding	735.232	805.914
ENSG00000067606.16	421.152	0.061543	0.015447	3.98413	6.7727e-05	0.00111541	1.04358	PRKCZ	protein_coding	437.35	465.45
ENSG00000186073.12	255.963	-0.0581338	0.0145917	-3.98404	6.77524e-05	0.00111541	0.960506	C15orf41	protein_coding	287.073	277.274
ENSG00000259820.1	291.278	-0.0680376	0.0170776	-3.98402	6.77593e-05	0.00111541	0.953935	AC083843.2	lincRNA	329.907	316.445
ENSG00000159339.13	1411.65	0.144304	0.0362241	3.98366	6.78616e-05	0.00111652	1.1052	PADI4	protein_coding	1368.1	1607.73
ENSG00000135940.6	1547.82	0.0848586	0.0213091	3.98226	6.82629e-05	0.00112254	1.06058	COX5B	protein_coding	1586.55	1722.39
ENSG00000136536.14	5879.27	0.0795743	0.0199866	3.98139	6.85147e-05	0.0011261	1.05671	2022-03-07	protein_coding	6198.06	6662.91
ENSG00000146676.8	3046.21	0.0710051	0.0178409	3.9799	6.89433e-05	0.00113256	1.05045	PURB	protein_coding	3235.89	3443.23
ENSG00000121940.15	706.725	-0.0475329	0.0119439	-3.97968	6.9009e-05	0.00113306	0.96759	CLCC1	protein_coding	784.796	770.322
ENSG00000183598.3	846.72	0.134789	0.0338742	3.9791	6.91765e-05	0.00113473	1.09793	HIST2H3D	protein_coding	845.622	946.361
ENSG00000121075.10	25.313	-0.175681	0.0441512	-3.97908	6.91816e-05	0.00113473	0.885349	TBX4	protein_coding	28.7898	26.5303
ENSG00000267174.5	65.6106	0.182772	0.0459497	3.97765	6.9601e-05	0.00114046	1.13506	AC011472.2	3prime_overlapping_ncRNA	62.9336	74.1289
ENSG00000257915.1	257.504	0.115456	0.0290267	3.97758	6.96215e-05	0.00114046	1.08332	GLULP5	processed_pseudogene	263.513	293.324
ENSG00000107959.15	698.693	-0.0539513	0.0135641	-3.97752	6.96382e-05	0.00114046	0.963294	PITRM1	protein_coding	782.67	759.479
ENSG00000166762.17	241.14	-0.100511	0.0252744	-3.97679	6.9853e-05	0.00114339	0.932703	CATSPER2	protein_coding	271.73	255.489
ENSG00000124074.11	115.79	0.0773631	0.0194555	3.97641	6.99625e-05	0.0011446	1.05509	ENKD1	protein_coding	118.144	127.88
ENSG00000275074.1	212.122	0.0825257	0.0207599	3.97524	7.03089e-05	0.00114967	1.05887	NUDT18	protein_coding	215.965	234.239
ENSG00000135148.11	1711.73	0.0807286	0.0203109	3.97465	7.04842e-05	0.00115195	1.05755	TRAFD1	protein_coding	1794.61	1927.49
ENSG00000258831.1	50.6967	0.207842	0.0522964	3.97431	7.05842e-05	0.001153	1.15496	AC103996.2	lincRNA	47.0907	60.0434
ENSG00000241400.1	7.75064	-0.198531	0.0499645	-3.97345	7.08384e-05	0.00115656	0.871437	AC022215.1	processed_pseudogene	9.07522	8.26579
ENSG00000129515.18	2170.87	0.0970237	0.0244232	3.9726	7.10909e-05	0.00116009	1.06956	SNX6	protein_coding	2280.29	2448.99
ENSG00000241549.8	223.732	-0.0856692	0.0215658	-3.97246	7.1135e-05	0.00116021	0.942347	GUSBP2	transcribed_unprocessed_pseudogene	251.144	241.549
ENSG00000271871.1	35.4419	-0.113199	0.0284973	-3.97229	7.11857e-05	0.00116045	0.924536	AC005740.4	antisense	40.7013	38.3592
ENSG00000112473.17	802.94	0.0725864	0.0182756	3.97177	7.13413e-05	0.00116239	1.0516	SLC39A7	protein_coding	840.869	900.259
ENSG00000279281.1	95.2947	-0.128603	0.032394	-3.96995	7.18876e-05	0.00117069	0.914717	AC015883.1	TEC	107.473	100.272
ENSG00000120280.5	709.591	0.103297	0.0260332	3.96789	7.25126e-05	0.00118027	1.07423	CXorf21	protein_coding	741.029	796.55
ENSG00000179761.11	113.499	0.0705806	0.0177888	3.9677	7.25699e-05	0.0011806	1.05014	PIPOX	protein_coding	116.619	125.355
ENSG00000273064.1	111.017	0.0650045	0.0163864	3.96699	7.27862e-05	0.00118352	1.04609	AC017083.1	antisense	116.075	123.488
ENSG00000052749.13	644.947	0.115868	0.0292091	3.96685	7.28293e-05	0.00118362	1.08363	RRP12	protein_coding	640.841	713.297
ENSG00000129749.3	84.9899	0.0882012	0.0222364	3.96652	7.29302e-05	0.00118465	1.06304	CHRNA10	protein_coding	86.385	93.5395
ENSG00000151461.19	2696.84	0.0620165	0.0156364	3.96617	7.30372e-05	0.00118579	1.04392	UPF2	protein_coding	2851.89	3020.31
ENSG00000160446.18	80.4838	0.108712	0.0274263	3.96377	7.37742e-05	0.00119714	1.07826	ZDHHC12	protein_coding	80.5553	88.125
ENSG00000107290.13	15744.2	0.070103	0.0176868	3.96358	7.38334e-05	0.0011975	1.04979	SETX	protein_coding	16569.9	17729
ENSG00000204390.9	171.962	0.0773089	0.0195088	3.96278	7.40825e-05	0.00120093	1.05505	HSPA1L	protein_coding	180.467	193.197
ENSG00000137502.9	508.089	-0.106099	0.0267798	-3.96189	7.43572e-05	0.00120477	0.929097	RAB30	protein_coding	597.681	539.708
ENSG00000282408.1	2.61267	-0.286134	0.0722243	-3.96173	7.4408e-05	0.00120498	0.820097	AL109920.1	antisense	3.13053	2.69605
ENSG00000079739.16	692.959	0.0668009	0.0168628	3.96144	7.45006e-05	0.00120587	1.04739	PGM1	protein_coding	721.022	772.121
ENSG00000105514.7	2399.51	0.109738	0.0277046	3.96101	7.46337e-05	0.00120741	1.07903	RAB3D	protein_coding	2449.71	2702
ENSG00000104974.11	1106.59	0.103167	0.0260471	3.96077	7.47084e-05	0.00120801	1.07413	LILRA1	protein_coding	1108.35	1226.82
ENSG00000197249.13	4303.12	0.116852	0.0295066	3.96019	7.4891e-05	0.00121035	1.08437	SERPINA1	protein_coding	4303.83	4820.43
ENSG00000184005.10	195.265	0.0988744	0.024968	3.96005	7.4935e-05	0.00121044	1.07094	ST6GALNAC3	protein_coding	199.498	219.804
ENSG00000163956.11	2691.77	0.0642534	0.0162264	3.9598	7.50113e-05	0.00121106	1.04554	LRPAP1	protein_coding	2782.08	2963.39
ENSG00000182463.15	432.519	-0.14172	0.0358169	-3.9568	7.59608e-05	0.00122577	0.906438	TSHZ2	protein_coding	495.903	456.472
ENSG00000175931.12	881.388	-0.157555	0.039822	-3.95648	7.60615e-05	0.00122678	0.896543	UBE2O	protein_coding	963.015	866.792
ENSG00000127364.3	156.721	-0.0966862	0.0244387	-3.95627	7.61293e-05	0.00122725	0.935179	TAS2R4	protein_coding	178.478	168.442
ENSG00000179981.10	399.497	-0.0607212	0.0153489	-3.95606	7.61957e-05	0.0012277	0.958785	TSHZ1	protein_coding	443.754	430.466
ENSG00000010361.13	215.06	0.0834364	0.0210933	3.95558	7.63497e-05	0.00122949	1.05954	FUZ	protein_coding	219.378	235.458
ENSG00000229320.3	261.257	0.080748	0.0204147	3.95539	7.64103e-05	0.00122949	1.05757	KRT8P12	transcribed_processed_pseudogene	272.48	291.351
ENSG00000073417.14	867.597	-0.0502112	0.0126945	-3.95535	7.6422e-05	0.00122949	0.965795	PDE8A	protein_coding	965.115	948.703
ENSG00000278254.4	42.1578	-0.112765	0.0285107	-3.95518	7.64758e-05	0.00122974	0.924814	AC004852.2	lincRNA	46.0088	43.8842
ENSG00000091039.16	11253.7	0.1249	0.0315813	3.95486	7.65787e-05	0.00123077	1.09043	OSBPL8	protein_coding	11617.2	12774.9
ENSG00000139178.10	1708.64	0.083602	0.0211406	3.95457	7.66732e-05	0.00123121	1.05966	C1RL	protein_coding	1730.82	1878.29
ENSG00000007923.15	447.256	-0.0527128	0.0133297	-3.95454	7.66831e-05	0.00123121	0.964122	DNAJC11	protein_coding	497.365	484.766
ENSG00000260550.2	17.5829	0.189635	0.0479554	3.9544	7.67285e-05	0.00123132	1.14047	AC136618.1	lincRNA	16.5774	20.1395
ENSG00000134602.15	1807.66	0.0837557	0.0211818	3.95413	7.68138e-05	0.00123207	1.05977	STK26	protein_coding	1906.7	2033.46
ENSG00000273198.1	2.62074	-0.202403	0.0512091	-3.95247	7.73476e-05	0.00124001	0.869102	AL096803.3	lincRNA	3.21018	2.77105
ENSG00000198874.12	474.112	-0.0499071	0.0126285	-3.95193	7.75249e-05	0.00124223	0.965999	TYW1	protein_coding	529.042	514.691
ENSG00000222852.1	9.14926	0.194413	0.0492077	3.95087	7.78665e-05	0.00124707	1.14426	RF00019	misc_RNA	8.96903	10.5092
ENSG00000207425.1	3.92376	-0.168489	0.0426473	-3.95076	7.7905e-05	0.00124707	0.889774	RF00019	misc_RNA	4.57522	4.08553
ENSG00000156599.10	1631.15	0.0398491	0.0100878	3.95023	7.80774e-05	0.0012492	1.02801	ZDHHC5	protein_coding	1718.43	1789.33
ENSG00000267767.2	51.7789	-0.102144	0.0258587	-3.95009	7.81221e-05	0.00124929	0.931647	LINC01801	lincRNA	58.1128	54.8579
ENSG00000207231.1	6.84839	-0.125943	0.0318879	-3.94955	7.82996e-05	0.0012515	0.916405	RF00019	misc_RNA	8.03319	7.42895
ENSG00000265733.1	9.3309	-0.108631	0.0275059	-3.94937	7.83569e-05	0.00125179	0.927468	SNORA74C-1	snoRNA	10.7987	10.1487
[truncated: 7,449 more rows]

## Sheet: DEG w  same direction in D&R
	pvalue_PPMI	padj_PPMI	log2FoldChange_PPMI	baseMean_raw.Case_PPMI	baseMean_raw.Control_PPMI	pvalue_PDBF	padj_PDBF	log2FoldChange_PDBF	baseMean_raw.Control_PDBF	baseMean_raw.Case_PDBF	geneType	symbol
ENSG00000205537.2	1.23116e-11	3.47717e-07	0.186812	15.3557	12.9748	0.00689173	0.039965	0.123866	11.0553	12.3553	antisense	AC121338.1
ENSG00000138411.12	1.63951e-08	9.26093e-05	0.184044	742	623.423	7.19651e-15	4.59641e-11	0.232294	492.471	603.676	protein_coding	HECW2
ENSG00000244436.2	6.00283e-08	0.000242197	0.203141	8.35572	7.02059	0.00584773	0.0354328	0.247973	5.7146	6.96184	processed_pseudogene	AC023050.1
ENSG00000274677.1	8.73353e-08	0.000308326	-0.0920312	35.1234	36.0114	0.00413981	0.0274757	-0.0463147	30.7146	29.8487	sense_intronic	AC040169.3
ENSG00000093134.14	1.09496e-07	0.00034361	0.198863	3776.6	3100.65	1.50872e-08	1.20453e-06	0.182526	2637.63	3121.46	protein_coding	VNN3
ENSG00000188690.13	3.32939e-07	0.000665909	-0.0629476	759.236	755.538	0.0158	0.0742602	-0.0291217	602.144	602.732	protein_coding	UROS
ENSG00000260583.1	3.45411e-07	0.000665909	-0.0857774	36.6407	38.2929	0.000494936	0.00531823	-0.061174	26.2544	25.1289	antisense	LINC00515
ENSG00000235119.1	3.53667e-07	0.000665909	0.0903787	35.7368	31.6362	2.17569e-09	2.73545e-07	0.102504	26.115	28.6224	lincRNA	AL138895.1
ENSG00000183666.16	4.34342e-07	0.000721595	-0.124309	444.791	470.076	0.000159512	0.00217322	-0.0845537	353.4	339.726	transcribed_unprocessed_pseudogene	GUSBP1
ENSG00000139890.9	6.77651e-07	0.00106327	0.164106	303.316	247.311	5.36646e-06	0.000142696	0.136871	236.872	263.346	protein_coding	REM2
ENSG00000103154.9	7.20376e-07	0.00107082	0.266539	40.8893	31.9703	8.21472e-06	0.00020289	0.231696	26.1991	32.2934	protein_coding	NECAB2
ENSG00000281162.2	1.08541e-06	0.00150352	0.202705	1047.33	853.872	1.00744e-06	3.5907e-05	0.18005	661.425	787.121	lincRNA	LINC01127
ENSG00000259318.1	1.17117e-06	0.00150352	-0.075994	42.9492	43.1991	3.70355e-05	0.000687633	-0.0612813	36.3628	35.1526	processed_pseudogene	AL356801.1
ENSG00000244242.1	1.94698e-06	0.00229119	0.184263	89.9728	72.0023	0.00926549	0.0498389	0.0953352	64.4447	72.3276	protein_coding	IFITM10
ENSG00000275401.1	2.50705e-06	0.00232596	-0.0775123	38.726	38.6751	2.54488e-05	0.000509215	-0.0712593	28.2434	27.1684	lincRNA	AL391095.3
ENSG00000200855.1	2.55302e-06	0.00232596	-0.132699	12.9365	13.4211	0.0397168	0.144017	-0.0556169	11.0354	10.6092	misc_RNA	RF00019
ENSG00000114737.15	2.51051e-06	0.00232596	-0.159861	528.319	555.568	0.0319158	0.122725	-0.0661724	455.409	419.204	protein_coding	CISH
ENSG00000111490.13	2.42648e-06	0.00232596	0.135115	261.67	222.318	0.000439527	0.00483185	0.0923376	187.221	206.357	protein_coding	TBC1D30
ENSG00000057704.12	2.69537e-06	0.00237892	0.143564	3631.58	3049.68	8.76967e-12	5.00106e-09	0.182992	2570.87	3008.85	protein_coding	TMCC3
ENSG00000111261.13	2.92051e-06	0.002426	0.146395	722.354	606.499	3.14635e-07	1.39167e-05	0.145766	496.4	573.788	protein_coding	MANSC1
ENSG00000189134.3	2.87481e-06	0.002426	0.182083	57.6515	50.508	1.24354e-13	2.41101e-10	0.246011	47.385	58.0395	protein_coding	NKAPL
ENSG00000134779.14	3.70894e-06	0.00261569	-0.0876776	2185.14	2208.68	0.000776819	0.00756333	-0.0619892	1769.46	1726.4	protein_coding	TPGS2
ENSG00000139112.10	4.11157e-06	0.00261569	0.120328	3648.09	3173.67	6.9939e-10	1.0978e-07	0.143175	2629.53	3017.3	protein_coding	GABARAPL1
ENSG00000236345.1	3.77134e-06	0.00261569	0.140207	227.702	197.499	1.28345e-13	2.41101e-10	0.197845	153.055	183.055	antisense	AL354719.2
ENSG00000011198.9	4.26023e-06	0.00261569	0.150674	7870.3	6696.99	1.64927e-11	7.21498e-09	0.188802	5268.97	6265.45	protein_coding	ABHD5
ENSG00000135378.3	4.19827e-06	0.00261569	0.161277	1532.13	1279.7	1.74088e-10	3.88776e-08	0.191038	936.796	1092.31	protein_coding	PRRG4
ENSG00000143486.15	4.02467e-06	0.00261569	-0.0665676	899.358	924.572	0.0309413	0.120091	-0.0287056	731.458	717.236	protein_coding	EIF2D
ENSG00000253981.5	3.74666e-06	0.00261569	0.180813	276.837	231.668	1.44923e-10	3.47979e-08	0.218804	192.354	235.033	transcribed_unprocessed_pseudogene	ALG1L13P
ENSG00000110911.15	4.89338e-06	0.00293132	-0.0575457	1380.17	1373.03	2.7621e-06	8.27464e-05	-0.0506723	1030.37	1003.53	protein_coding	SLC11A2
ENSG00000188158.15	5.57563e-06	0.00321372	0.135601	475.742	407.581	3.05427e-08	2.08975e-06	0.150293	337.595	390.826	protein_coding	NHS
ENSG00000174007.7	6.07552e-06	0.00323756	0.150091	947.826	827.018	3.82761e-12	3.05587e-09	0.20357	749.533	878.028	protein_coding	CEP19
ENSG00000102010.14	5.98542e-06	0.00323756	0.228599	282.588	224.137	4.55845e-11	1.53236e-08	0.291307	218.367	279.053	protein_coding	BMX
ENSG00000246016.2	5.89692e-06	0.00323756	0.147665	87.4446	70.8558	0.00133818	0.0115282	0.0960963	64.1615	70.9737	antisense	LINC01513
ENSG00000253519.1	5.82014e-06	0.00323756	0.13053	45.2468	38.984	0.0399498	0.144654	0.0700297	34.1084	37.3316	antisense	AC106801.1
ENSG00000223819.2	6.41815e-06	0.00326111	0.141414	39.1234	32.746	3.39983e-07	1.46552e-05	0.150972	24.9004	28.0882	processed_pseudogene	PPIAP89
ENSG00000166130.14	6.40726e-06	0.00326111	0.157976	1562.32	1342.32	2.17381e-13	3.53586e-10	0.223943	1103.14	1334.52	protein_coding	IKBIP
ENSG00000181016.9	7.00415e-06	0.00339982	0.144128	346.058	297.181	5.75868e-08	3.57094e-06	0.155623	235.343	272.974	protein_coding	LSMEM1
ENSG00000171049.8	7.80363e-06	0.00349838	0.167226	7391.3	6248.92	9.6612e-09	8.54655e-07	0.196323	5554.77	6561.87	protein_coding	FPR2
ENSG00000115590.13	7.70028e-06	0.00349838	0.173579	2728.41	2254.71	2.41034e-07	1.12865e-05	0.179121	1928.64	2297.01	protein_coding	IL1R2
ENSG00000108582.11	8.58413e-06	0.00361853	0.123096	10082.5	8624.1	2.28061e-07	1.08058e-05	0.126895	7101.21	7876.65	protein_coding	CPD
ENSG00000225873.4	8.27562e-06	0.00361853	0.169332	189.301	158.888	5.84471e-10	9.8757e-08	0.203165	153.487	181.299	transcribed_unitary_pseudogene	C3orf86
ENSG00000258922.1	8.81084e-06	0.00365948	0.135243	55.7005	48.6751	6.1925e-05	0.00104028	0.115971	38.7235	42.6316	sense_intronic	AC106028.2
ENSG00000230257.2	1.0497e-05	0.00411761	0.187989	260.034	215.034	9.20386e-10	1.39301e-07	0.227589	202.144	246.939	protein_coding	NFE4
ENSG00000254928.1	1.11145e-05	0.00424198	0.159212	35.9292	29.5584	2.31571e-05	0.000473949	0.158439	19.3473	22.2211	antisense	AP001372.3
ENSG00000276136.1	1.2015e-05	0.004407	0.0948821	407.911	363.442	3.30059e-11	1.18432e-08	0.120116	298.889	331.787	lincRNA	AC016957.2
ENSG00000257878.1	1.50625e-05	0.00531762	0.16541	381.662	325.362	3.23033e-12	2.84233e-09	0.227053	250.108	306.091	antisense	AC007298.2
ENSG00000277463.1	1.61674e-05	0.00534234	0.105441	18.8675	16.611	7.45895e-09	7.00593e-07	0.143475	12.2876	13.8816	lincRNA	AC080038.2
ENSG00000103569.9	1.57713e-05	0.00534234	0.152079	16717	14064.7	1.83554e-10	3.98761e-08	0.189816	11258.6	13063.3	protein_coding	AQP9
ENSG00000134873.9	1.55799e-05	0.00534234	0.12637	872.708	758.378	1.05276e-10	2.68959e-08	0.17628	756.96	870.091	protein_coding	CLDN10
ENSG00000113719.15	1.60421e-05	0.00534234	0.118501	6407.41	5443.19	2.91726e-11	1.0621e-08	0.155804	5079.45	5821.02	protein_coding	ERGIC1
ENSG00000188895.11	1.65715e-05	0.00537965	0.108579	10276.4	9009.11	8.50739e-13	1.01424e-09	0.145793	7157.08	8070.93	protein_coding	MSL1
ENSG00000179299.16	1.78177e-05	0.00571847	0.149428	365.539	307.769	5.61214e-05	0.000962534	0.128156	248.042	282.572	protein_coding	NSUN7
ENSG00000176788.8	1.94957e-05	0.00605073	0.167898	7443.87	5938.76	5.80032e-06	0.000152959	0.156077	6399.22	7197.83	protein_coding	BASP1
ENSG00000115137.11	1.93444e-05	0.00605073	-0.0645633	232.479	231.375	0.00115089	0.0102812	-0.0440287	178.989	175.261	protein_coding	DNAJC27
ENSG00000214293.8	1.9427e-05	0.00605073	0.0768225	213.123	192.206	2.04626e-07	9.85633e-06	0.088696	149.535	164.405	lincRNA	APTR
ENSG00000166446.14	1.99573e-05	0.00612668	-0.0751761	357.831	349.803	5.76353e-11	1.76979e-08	-0.110826	277.825	266.096	protein_coding	CDYL2
ENSG00000151726.13	2.08255e-05	0.00625716	0.17396	32377.7	26750.3	2.63738e-07	1.21305e-05	0.179835	22617.4	26339.1	protein_coding	ACSL1
ENSG00000112096.17	2.11395e-05	0.00628466	0.126933	84280.4	72090.3	3.07513e-08	2.09838e-06	0.154986	57883.2	65109.8	protein_coding	SOD2
ENSG00000148187.17	2.2788e-05	0.00656737	-0.0475125	679.688	678.336	8.9484e-06	0.000218023	-0.0460252	550.414	536.363	protein_coding	MRRF
ENSG00000137266.14	2.32219e-05	0.00662481	-0.160342	251.289	275.693	6.53985e-06	0.000169109	-0.184543	229.381	205.862	protein_coding	SLC22A23
ENSG00000038219.12	2.47481e-05	0.00670643	0.0997079	15766.6	14052.2	7.98486e-12	4.90378e-09	0.136446	12780.2	14335.4	protein_coding	BOD1L1
ENSG00000235749.2	2.47679e-05	0.00670643	0.11844	87.6679	75.286	9.49835e-07	3.43133e-05	0.135716	49.3319	55.8237	antisense	AL390860.1
ENSG00000112303.13	2.49327e-05	0.00670643	0.181023	21316.2	17914.3	7.53595e-10	1.17395e-07	0.227165	17533.6	20903.5	protein_coding	VNN2
ENSG00000113368.11	2.59447e-05	0.0068482	0.154325	2096.07	1755.08	6.31631e-07	2.47457e-05	0.149748	1600.52	1813.21	protein_coding	LMNB1
ENSG00000119723.16	2.85091e-05	0.00712551	-0.0503608	544.49	547.87	1.86524e-05	0.000397374	-0.0486657	389.586	381.397	protein_coding	COQ6
ENSG00000173281.4	2.79553e-05	0.00712551	0.133662	5320.82	4603.12	1.23621e-10	3.0368e-08	0.172492	3824.67	4352.53	protein_coding	PPP1R3B
ENSG00000233527.8	3.11231e-05	0.00754598	-0.0407276	111.35	108.524	2.57258e-05	0.000513149	-0.0402217	87.1106	85.9276	antisense	ZNF529-AS1
ENSG00000275527.1	3.2596e-05	0.00754598	-0.265335	25.8312	27.5172	0.00814744	0.0453628	-0.160998	24.2611	21.4605	lincRNA	AC100835.2
ENSG00000051620.10	3.2377e-05	0.00754598	0.0927207	4654.08	4175.62	1.30182e-09	1.77665e-07	0.113889	3604.94	3971.83	protein_coding	HEBP2
ENSG00000163235.15	3.19664e-05	0.00754598	0.137266	1013.99	895.172	8.35652e-05	0.00131396	0.114532	713.743	785.095	protein_coding	TGFA
ENSG00000256229.7	3.31966e-05	0.00762252	0.0977164	933.318	856.867	5.36632e-11	1.71373e-08	0.137543	687.469	762.576	protein_coding	ZNF486
ENSG00000262001.1	3.68103e-05	0.00775845	0.0851483	268.503	235.714	0.00167247	0.0136452	0.0596383	196.533	211.58	antisense	DLGAP1-AS2
ENSG00000189067.12	3.48598e-05	0.00775845	0.128372	17718.9	15463.7	7.40744e-11	2.09342e-08	0.174538	15086.4	17332.2	protein_coding	LITAF
ENSG00000177873.12	3.49065e-05	0.00775845	-0.0447075	568.661	558.057	0.0221963	0.0948661	-0.0238635	409.748	410.692	protein_coding	ZNF619
ENSG00000136630.12	3.65186e-05	0.00775845	0.129484	634.57	539.686	4.63659e-10	8.55893e-08	0.180018	495.686	568.787	protein_coding	HLX
ENSG00000165046.12	3.48432e-05	0.00775845	0.0940034	297.799	264.222	6.0932e-07	2.40527e-05	0.107837	211.31	236.13	protein_coding	LETM2
ENSG00000254328.1	3.64281e-05	0.00775845	0.0873649	24.7877	22.9405	3.67002e-06	0.000104365	0.108186	13.9757	15.5303	processed_pseudogene	AC008429.4
ENSG00000272853.1	3.65895e-05	0.00775845	-0.0637238	44.0907	44.7849	0.0020226	0.0158197	-0.0498567	30.4845	30.0368	lincRNA	AC069544.1
ENSG00000140563.14	3.7601e-05	0.00786642	0.114926	11476	10029.6	2.04035e-07	9.84267e-06	0.121594	8395.88	9429.08	protein_coding	MCTP2
ENSG00000223878.1	3.84543e-05	0.0078925	0.113944	144.971	127.352	3.05593e-08	2.08975e-06	0.126349	104.002	115.611	processed_pseudogene	PPIAP53
ENSG00000244361.1	3.83753e-05	0.0078925	0.236256	11.8675	9.36156	0.00012293	0.00176741	0.18291	9.34513	10.9789	processed_pseudogene	RPL30P7
ENSG00000168495.12	3.99266e-05	0.0079975	-0.0635873	476.824	477.611	0.00432709	0.0283225	-0.042227	361.796	353.643	protein_coding	POLR3D
ENSG00000160588.9	4.20542e-05	0.00830586	0.122732	5554.77	4858.16	2.29937e-11	9.04623e-09	0.168066	3773.14	4348.12	protein_coding	MPZL3
ENSG00000114021.11	4.25717e-05	0.00834967	-0.0567658	797.171	802.897	9.13467e-06	0.000221669	-0.0547781	654.688	633.161	protein_coding	NIT2
ENSG00000273306.1	4.35762e-05	0.00844792	-0.0838532	24.6987	25.4165	6.80437e-14	1.66939e-10	-0.14332	22.5022	20.5368	antisense	AC018690.1
ENSG00000169895.5	4.47205e-05	0.0084597	0.0497592	1673.15	1540.64	5.12918e-05	0.000894594	0.0506459	1298.94	1342.99	protein_coding	SYAP1
ENSG00000163162.8	4.4592e-05	0.0084597	0.108103	24633.4	21845.5	1.12555e-10	2.85273e-08	0.146099	17388.3	19701.3	protein_coding	RNF149
ENSG00000170837.2	4.48157e-05	0.0084597	0.152421	665.971	564.263	4.15538e-15	3.31755e-11	0.248158	517.628	646.586	protein_coding	GPR27
ENSG00000186205.12	4.59835e-05	0.00860075	0.142519	1744.71	1485.06	2.08195e-08	1.57927e-06	0.16794	1285.79	1516.7	protein_coding	MTARC1
ENSG00000263235.1	4.81763e-05	0.00889309	-0.113047	13.2087	13.9794	0.000379778	0.00431609	-0.157349	11.6106	10.4013	sense_overlapping	AC006111.2
ENSG00000200731.1	4.86126e-05	0.00891536	-0.0676381	37.8966	38.1465	6.41217e-06	0.000166482	-0.0754104	28.8783	27.6171	snRNA	RNU1-124P
ENSG00000059804.15	4.98298e-05	0.00902142	0.133984	11472.3	9882.38	4.25266e-12	3.20539e-09	0.197084	8741.34	10148.6	protein_coding	SLC2A3
ENSG00000115604.10	5.06607e-05	0.00911344	0.121691	1643.61	1420.36	8.02839e-05	0.00127492	0.108756	1198.04	1331.27	protein_coding	IL18R1
ENSG00000003402.19	5.23331e-05	0.0091804	0.0806019	42209	37394.4	1.99108e-09	2.52322e-07	0.1005	30893.9	33896.9	protein_coding	CFLAR
ENSG00000132286.11	5.20649e-05	0.0091804	-0.0654235	859.775	869.407	0.0105098	0.0547788	-0.0324809	645.482	635.963	protein_coding	TIMM10B
ENSG00000170915.8	5.51177e-05	0.0096073	-0.0768143	770.216	802.034	0.000328749	0.0038612	-0.0599217	567.611	538.091	protein_coding	PAQR8
ENSG00000119471.14	5.5447e-05	0.0096073	0.11764	2206.55	1936.13	2.5896e-11	9.84509e-09	0.168311	1639.69	1872.58	protein_coding	HSDL2
ENSG00000102580.14	5.72309e-05	0.00979619	0.0991124	4406.77	3831.19	1.33146e-07	6.97053e-06	0.117301	3438.04	3791.98	protein_coding	DNAJC3
ENSG00000221869.4	5.80394e-05	0.00987475	0.134998	3680.48	3133.06	4.99344e-07	2.01855e-05	0.151105	3535.34	4093.2	protein_coding	CEBPD
ENSG00000182310.14	5.92182e-05	0.00989644	0.138895	233.534	192.897	0.00198355	0.0155906	0.0950181	164.586	184.989	protein_coding	SPACA6
ENSG00000160179.18	5.85977e-05	0.00989644	0.155119	1332.94	1108.45	2.50269e-11	9.62933e-09	0.230605	964.626	1175.05	protein_coding	ABCG1
ENSG00000010539.11	5.89259e-05	0.00989644	0.0584939	1682.68	1566.68	6.52682e-09	6.2971e-07	0.0775328	1249.51	1324.3	protein_coding	ZNF200
ENSG00000164674.15	6.03239e-05	0.00997319	0.107948	1637	1407.44	1.80988e-08	1.40629e-06	0.118334	1156.83	1307.4	protein_coding	SYTL3
ENSG00000249662.6	6.07415e-05	0.00997397	0.157389	354.407	306.561	1.48041e-09	1.93758e-07	0.200674	222.358	270.98	protein_coding	LINC02218
ENSG00000071564.14	6.25639e-05	0.0101908	-0.120563	531.503	549.915	0.0336907	0.127811	-0.0568547	468.44	456.917	protein_coding	TCF3
ENSG00000279821.1	6.27834e-05	0.0101908	0.136872	141.886	115.86	0.0279716	0.111869	0.0726499	104.531	113.822	TEC	AC145098.2
ENSG00000166523.7	6.49172e-05	0.010211	0.155062	3140.33	2615.95	5.10165e-08	3.24544e-06	0.191654	2065.85	2443.84	protein_coding	CLEC4E
ENSG00000254788.7	6.33345e-05	0.010211	0.111826	198.88	173.824	0.00282744	0.0204517	0.0745594	124.697	134.371	protein_coding	CKLF-CMTM1
ENSG00000182247.9	6.50535e-05	0.010211	-0.0847515	210.203	214.249	0.00395814	0.0265862	-0.0557969	147.626	145.059	protein_coding	UBE2E2
ENSG00000092200.12	6.70796e-05	0.0103526	0.128971	302.53	265.625	1.79174e-11	7.62923e-09	0.190038	224.013	267.237	protein_coding	RPGRIP1
ENSG00000285861.1	6.64607e-05	0.0103526	0.132188	10.5082	8.89474	0.00238968	0.0179648	0.103212	6.5885	7.30789	antisense	AC026991.2
ENSG00000233246.1	6.70761e-05	0.0103526	0.129423	10.824	9.45995	0.000123692	0.00177612	0.129218	6.63717	7.49737	antisense	AL513327.2
ENSG00000059728.10	7.09123e-05	0.0107488	0.125315	30472.7	26340.4	5.73979e-08	3.56878e-06	0.141909	21699.1	24634.6	protein_coding	MXD1
ENSG00000154122.13	7.11688e-05	0.0107488	-0.120077	1727.1	1776.51	0.00171321	0.0138862	-0.0918398	1408.43	1341.45	protein_coding	ANKH
ENSG00000105835.11	7.02852e-05	0.0107488	0.158963	72859.5	62353.9	3.32311e-10	6.63272e-08	0.216407	53917.8	63279.1	protein_coding	NAMPT
ENSG00000178726.6	7.69706e-05	0.010924	0.169849	1098.43	961.316	6.49519e-08	3.89895e-06	0.207732	852.153	1015.63	protein_coding	THBD
ENSG00000167434.9	7.68243e-05	0.010924	0.176686	375.439	310.924	5.37441e-12	3.81404e-09	0.262632	279.792	350.412	protein_coding	CA4
ENSG00000145491.11	7.6465e-05	0.010924	0.131808	464.505	402.087	4.16847e-13	5.3248e-10	0.212942	321.312	384.32	protein_coding	ROPN1L
ENSG00000244687.11	7.68375e-05	0.010924	-0.0727715	1427.36	1431.06	0.000490224	0.0052747	-0.0534785	1079.73	1054.83	protein_coding	UBE2V1
ENSG00000280181.1	7.44397e-05	0.010924	0.105248	111.33	98.3707	0.000154554	0.00211969	0.092203	73.8097	80.8434	TEC	AC025262.2
ENSG00000106263.17	7.9511e-05	0.0111467	-0.0911297	2025.19	2045.19	0.0181539	0.0820704	-0.049211	1752.05	1718.53	protein_coding	EIF3B
ENSG00000284930.1	8.18132e-05	0.0112715	0.132133	934.027	811.645	1.63468e-10	3.72883e-08	0.179433	724.237	849.482	lincRNA	AC005280.2
ENSG00000084110.10	8.16443e-05	0.0112715	0.129401	2874.94	2458.16	2.25063e-08	1.67244e-06	0.155485	1975.02	2300.31	protein_coding	HAL
ENSG00000267512.1	8.36509e-05	0.0113766	0.110383	14.2414	12.8535	0.00441755	0.0287731	0.125597	10.2235	11.525	antisense	AC011446.1
ENSG00000135407.10	8.41633e-05	0.0113766	0.131552	751.541	642.844	0.000140366	0.00196432	0.109854	538.648	592.445	protein_coding	AVIL
ENSG00000167110.17	8.57439e-05	0.0115317	0.0784538	1164.55	1005.72	0.00125036	0.0109297	0.0581829	995.418	1061.1	protein_coding	GOLGA2
ENSG00000102882.11	8.70749e-05	0.0115392	0.106438	580.009	492.712	5.74402e-08	3.56878e-06	0.133405	556.498	622.775	protein_coding	MAPK3
ENSG00000274357.1	8.78421e-05	0.0115392	0.127342	34.8385	29.8169	2.30163e-07	1.08893e-05	0.155673	27.5465	31.3171	misc_RNA	RF00017
ENSG00000155744.9	8.73533e-05	0.0115392	0.12753	9335.39	8111.14	3.06683e-07	1.36542e-05	0.137132	5987.1	6669.66	protein_coding	FAM126B
ENSG00000226842.1	8.63672e-05	0.0115392	0.104781	15.9601	14.1625	6.86261e-07	2.63812e-05	0.133421	10.4447	11.8105	antisense	AL158834.1
ENSG00000130021.13	9.04009e-05	0.0117659	-0.060293	275.232	280.609	0.0183958	0.0829525	-0.0332269	223.996	203.243	protein_coding	PUDP
ENSG00000184730.10	9.18083e-05	0.0118942	0.131646	3358.87	2722.98	2.94148e-06	8.70585e-05	0.13478	2661.75	3020.4	protein_coding	APOBR
ENSG00000108559.11	9.32279e-05	0.0119683	-0.079049	751.875	779.767	0.00135756	0.0116399	-0.0533664	594.965	571.482	protein_coding	NUP88
ENSG00000165115.14	9.41215e-05	0.0120284	0.118254	1243.77	1074.22	9.91917e-07	3.54724e-05	0.136402	859.279	992.159	protein_coding	KIF27
ENSG00000136319.11	9.49591e-05	0.0120808	-0.0561762	1212.13	1230.25	0.00256552	0.0189784	-0.0358297	863.281	848.957	protein_coding	TTC5
ENSG00000184178.15	9.5902e-05	0.0121146	-0.0653207	864.43	890.297	0.00815615	0.0453854	-0.039306	700.139	679.438	protein_coding	SCFD2
ENSG00000251179.1	9.76085e-05	0.012198	0.205583	32.6661	25.5606	0.0299371	0.117148	0.103418	23.2212	26.1079	antisense	TMEM92-AS1
ENSG00000144029.11	9.80629e-05	0.0122008	-0.0272408	1803.09	1777.89	0.045906	0.159106	-0.0136706	1413.85	1420.4	protein_coding	MRPS5
ENSG00000144468.16	9.98444e-05	0.0123311	-0.0912509	1523.56	1563.15	0.0016864	0.0137281	-0.0661557	1154.08	1121.5	protein_coding	RHBDD1
ENSG00000198556.13	9.99834e-05	0.0123311	-0.0524982	550.592	559.805	0.000433097	0.00477753	-0.0461904	427.438	416.993	protein_coding	ZNF789
ENSG00000268170.2	0.000101944	0.0124641	0.157478	186.234	159.293	4.14487e-05	0.000753365	0.14739	134.71	150.661	antisense	AC073342.2
ENSG00000198876.12	0.000101666	0.0124641	-0.214929	32153.3	35067.5	0.0130405	0.0646257	-0.122313	27287.4	25753.8	protein_coding	DCAF12
ENSG00000165175.15	0.00010585	0.0127782	0.101489	3298.91	2891.29	5.70298e-08	3.55712e-06	0.132281	2392.56	2677.28	protein_coding	MID1IP1
ENSG00000184787.18	0.00010567	0.0127782	-0.0597825	3198.18	3282.58	0.0316567	0.122082	-0.0265103	2532.67	2486.41	protein_coding	UBE2G2
ENSG00000115507.9	0.000109181	0.0131217	0.237575	44.118	33.3272	0.00757756	0.0428983	0.13904	28.1018	33.1987	protein_coding	OTX1
ENSG00000119977.20	0.000112085	0.0133485	-0.072337	220.947	222.005	0.000116332	0.00169559	-0.0632763	175.677	168.87	protein_coding	TCTN3
ENSG00000160563.13	0.000112486	0.0133485	-0.0556873	304.985	304.586	0.00379669	0.0257754	-0.0376084	238.119	235.543	protein_coding	MED27
ENSG00000124126.13	0.000115746	0.0135644	0.118555	17339.5	14391.5	7.45926e-06	0.000187568	0.11222	14066.2	15580.9	protein_coding	PREX1
ENSG00000249138.1	0.000118667	0.0137358	0.169897	433.955	353.609	0.00110304	0.00994508	0.123391	258.56	293.02	transcribed_processed_pseudogene	SLED1
ENSG00000062282.14	0.000123075	0.014073	0.129989	4240.4	3610.94	8.08591e-11	2.2123e-08	0.191162	3450.3	4058.03	protein_coding	DGAT2
ENSG00000253736.2	0.00012479	0.0141544	0.156534	34.5227	29.8055	0.000267831	0.00329095	0.137649	25.9867	29.0526	antisense	AC022217.3
ENSG00000103196.11	0.000125471	0.0141748	0.165046	3647.36	2936.5	2.8114e-05	0.000547451	0.153256	2819.01	3217.51	protein_coding	CRISPLD2
ENSG00000167676.4	0.000127134	0.0142485	0.173791	390.555	305.174	0.00152414	0.0127243	0.124633	308.04	339.507	protein_coding	PLIN4
ENSG00000242860.3	0.000134478	0.0147785	0.0892775	60.8185	54.0686	0.0274706	0.110696	0.0526993	45.2345	47.9329	misc_RNA	RN7SL180P
ENSG00000163464.7	0.000135746	0.0148026	0.136526	10278.2	8925.3	6.26903e-12	4.25961e-09	0.210702	8121.31	9592.1	protein_coding	CXCR1
ENSG00000268734.1	0.000140483	0.0148949	0.123815	127.857	107.414	0.000525169	0.00557371	0.0981508	97.104	107.213	lincRNA	AC245128.3
ENSG00000259376.1	0.000142451	0.0148949	0.142929	8.13793	7.00458	0.000469574	0.00509369	0.125858	5.87832	6.57237	antisense	AC090907.1
ENSG00000156232.7	0.000141037	0.0148949	-0.048553	909.779	914.348	0.000995319	0.00917861	-0.0362584	671.909	664.012	protein_coding	WHAMM
ENSG00000201573.1	0.000138488	0.0148949	-0.103766	14.1016	14.3021	1.11383e-05	0.000260016	-0.128234	9.61504	8.85789	misc_RNA	RF00019
ENSG00000146535.13	0.000138958	0.0148949	-0.161421	603.84	624.089	0.00420046	0.0277324	-0.112114	557.341	529.587	protein_coding	GNA12
ENSG00000284882.1	0.000142886	0.0148949	0.108812	286.797	252.595	2.48441e-08	1.78693e-06	0.147801	204.549	235.392	bidirectional_promoter_lncRNA	AL359762.1
ENSG00000174206.12	0.000139977	0.0148949	-0.0593167	468.394	481.952	0.0425	0.151056	-0.0284117	347.914	337.545	protein_coding	C12orf66
ENSG00000165792.17	0.000146493	0.0151	-0.0639634	686.575	702.542	0.0346951	0.130613	-0.0302362	547.403	543.147	protein_coding	METTL17
ENSG00000120868.13	0.000148575	0.0152463	0.0933429	9659.63	8534.32	4.30405e-07	1.78275e-05	0.0984075	6613.58	7342.69	protein_coding	APAF1
ENSG00000243554.1	0.000151069	0.0153476	-0.0735322	27.5662	29.3295	0.00454186	0.0293912	-0.0640118	15.823	15.1921	transcribed_unprocessed_pseudogene	AC004967.1
ENSG00000148572.15	0.000152395	0.0154268	0.11466	1534.99	1338.18	1.62617e-11	7.21274e-09	0.160113	1186.27	1360.54	protein_coding	NRBF2
ENSG00000214013.9	0.000154893	0.0155682	-0.0564269	1951.64	1944.09	1.14597e-05	0.00026635	-0.0539488	1502.48	1473.75	protein_coding	GANC
ENSG00000115828.16	0.000156158	0.0156396	0.147523	2923.65	2483.35	7.28983e-11	2.07858e-08	0.217765	2223.07	2677.64	protein_coding	QPCT
ENSG00000284948.1	0.000157881	0.0156457	0.126561	3270.69	2882.48	2.26176e-09	2.82146e-07	0.169039	2104.23	2459.27	lincRNA	AC107959.4
ENSG00000143226.13	0.00015777	0.0156457	0.118865	22785	20222.6	1.03542e-11	5.42068e-09	0.177308	20068.3	23133.5	protein_coding	FCGR2A
ENSG00000113303.11	0.000157597	0.0156457	0.141057	894.822	778.954	9.47812e-12	5.21868e-09	0.22056	615.104	745.249	protein_coding	BTNL8
ENSG00000187097.12	0.000159194	0.0157207	-0.0833198	536.849	531.416	0.0188265	0.0843823	-0.0501638	441.086	431.483	protein_coding	ENTPD5
ENSG00000172164.14	0.000160532	0.0157976	-0.0702393	1160.86	1150.11	0.0369693	0.136867	-0.0312264	895.038	887.878	protein_coding	SNTB1
ENSG00000120029.12	0.000163759	0.0159484	-0.0571081	1035.35	1028.31	4.61635e-06	0.000125466	-0.0528992	790.153	772.955	protein_coding	ARMH3
ENSG00000140044.12	0.000168752	0.0162664	0.0981773	1203.12	1059.71	1.82194e-10	3.98518e-08	0.146627	871.082	1004.49	protein_coding	JDP2
ENSG00000133028.11	0.0001724	0.0165615	-0.0348495	1124.33	1096.91	0.000161435	0.00219383	-0.0316118	836.542	831.251	protein_coding	SCO1
ENSG00000167674.14	0.00017415	0.016673	0.0778816	677	578.684	0.00485795	0.0309077	0.0561438	604.23	633.542	protein_coding	HDGFL2
ENSG00000167536.13	0.000178697	0.0170505	0.116283	966.935	855.114	3.45117e-07	1.48136e-05	0.136605	745.469	827.387	protein_coding	DHRS13
ENSG00000198671.3	0.000184482	0.0173678	0.0789769	25.2214	22.1098	8.06901e-05	0.00127946	0.0867413	15.6726	17.4211	antisense	AC135895.1
ENSG00000196549.10	0.000183497	0.0173678	0.154114	17322.1	14466.4	1.6253e-08	1.27842e-06	0.198916	12680.7	15200.3	protein_coding	MME
ENSG00000067606.16	0.000187332	0.0174907	0.0658324	545.488	487.499	6.7727e-05	0.00111541	0.061543	437.35	465.45	protein_coding	PRKCZ
ENSG00000013364.18	0.000186842	0.0174907	0.0879329	6965.27	6162.44	7.89953e-07	2.95758e-05	0.105674	5990.15	6566.44	protein_coding	MVP
ENSG00000180953.11	0.000189595	0.0175565	0.112069	1022.91	905.188	7.195e-06	0.000182214	0.114662	692.294	774.779	protein_coding	ST20
ENSG00000013583.9	0.000193474	0.0177144	-0.165708	186.788	190.977	0.0456363	0.158464	-0.0807273	144.106	141.624	protein_coding	HEBP1
ENSG00000270330.1	0.000195391	0.0178014	0.245557	8.29946	6.83066	0.00628328	0.0373322	0.171088	5.28761	6.35395	processed_pseudogene	AL009183.1
ENSG00000221817.9	0.000198807	0.017939	-0.0449172	552.074	539.789	0.000412882	0.00460545	-0.0399383	431.166	424.692	processed_transcript	PPP3CB-AS1
ENSG00000205629.11	0.000200569	0.0179831	-0.0545791	207.586	203.757	0.00921042	0.0496179	-0.0344717	163.874	161.667	protein_coding	LCMT1
ENSG00000258565.1	0.000203304	0.0180563	0.108097	100.24	86.3021	0.00124346	0.0108973	0.085153	69.0531	75.1237	unprocessed_pseudogene	BLZF2P
ENSG00000116017.10	0.000205589	0.018202	0.0989526	1539.29	1277.75	2.7285e-05	0.000535728	0.0973934	1268.22	1400.98	protein_coding	ARID3A
ENSG00000175931.12	0.000206625	0.0182366	-0.167435	1116.21	1142.45	7.60615e-05	0.00122678	-0.157555	963.015	866.792	protein_coding	UBE2O
ENSG00000002016.17	0.000213306	0.0185938	-0.0601415	334.327	335.133	0.00105077	0.00955895	-0.055158	251.469	246.584	protein_coding	RAD52
ENSG00000189013.14	0.000215721	0.0186105	0.309243	13.6044	10.1648	0.0172589	0.0792583	0.176701	8.34513	9.76579	protein_coding	KIR2DL4
ENSG00000171791.12	0.000214679	0.0186105	-0.103556	6400.67	6828.11	0.000271247	0.00332142	-0.0847576	5177.14	4729.93	protein_coding	BCL2
ENSG00000215241.3	0.000216792	0.0186105	0.0908675	158.938	140.471	0.00466987	0.0299703	0.0620399	114.024	123.022	lincRNA	LINC02449
ENSG00000201441.1	0.000216114	0.0186105	0.159292	22.2849	19.6476	4.5269e-06	0.000123879	0.170401	17.3783	20.2408	snRNA	RNU6-646P
ENSG00000006652.13	0.000216633	0.0186105	0.115338	6575.1	5786.55	1.00913e-09	1.47153e-07	0.156606	4593	5279.41	protein_coding	IFRD1
ENSG00000100644.16	0.000225561	0.0190507	0.0933797	4959.51	4401.3	9.01446e-06	0.000219105	0.103915	3971.45	4353.5	protein_coding	HIF1A
ENSG00000059588.9	0.000225966	0.0190507	-0.0744863	1718.79	1798.94	0.0027548	0.0200306	-0.0523859	1326.14	1272.97	protein_coding	TARBP1
ENSG00000183444.10	0.00022576	0.0190507	-0.0873724	98.3067	99.5973	0.0348525	0.131113	-0.0437193	82.1482	79.0645	unprocessed_pseudogene	OR7E38P
ENSG00000169084.13	0.000227991	0.0191553	0.0953902	800.41	697.984	0.00223869	0.0170708	0.0634937	605.263	661.893	protein_coding	DHRSX
ENSG00000263993.2	0.000231423	0.0192805	0.123295	10.2613	8.627	0.00408627	0.0272092	0.0903593	7.6792	8.41974	misc_RNA	RN7SL786P
ENSG00000120158.11	0.000233767	0.0194185	-0.0794482	729.241	744.201	0.0235662	0.0993383	-0.0432472	569.73	558.341	protein_coding	RCL1
ENSG00000254694.1	0.00023745	0.019609	-0.0796785	22.2087	22.8924	0.000834169	0.00798537	-0.073359	16.7522	16.0066	antisense	AP001893.1
ENSG00000203288.3	0.000239385	0.0196615	-0.0621423	36.6534	37.0709	0.0295066	0.115937	-0.0352757	30.1947	30.0237	antisense	TDRKH-AS1
ENSG00000145882.10	0.000239477	0.0196615	-0.068527	503.396	514.805	0.0298917	0.117013	-0.0360243	394.292	381.538	protein_coding	PCYOX1L
ENSG00000153814.12	0.000242838	0.0198796	-0.144648	1839.07	1820.97	0.00100071	0.0092177	-0.102729	1318.28	1270.17	protein_coding	JAZF1
ENSG00000146409.11	0.000246285	0.0200456	-0.0897104	692.318	712.284	0.015829	0.0743271	-0.0496118	518.283	505.939	protein_coding	SLC18B1
ENSG00000166788.9	0.000249911	0.0202823	-0.065075	302.902	308.696	0.00092392	0.00865514	-0.0545987	239.285	232.182	protein_coding	SAAL1
ENSG00000112195.8	0.000251023	0.0203142	0.10217	1924.51	1691.05	1.85367e-07	9.12125e-06	0.137842	1459.61	1649.26	protein_coding	TREML2
ENSG00000233184.6	0.00025689	0.0206724	-0.0912788	283.031	305.918	1.69611e-06	5.44171e-05	-0.112651	227.482	204.887	antisense	AC093157.1
ENSG00000158089.14	0.000256914	0.0206724	0.199645	168.86	139.213	0.0169631	0.0782675	0.116948	119.093	133.009	protein_coding	GALNT14
ENSG00000141084.10	0.000268181	0.0210358	-0.156946	1213.64	1254.08	0.0191233	0.0853558	-0.0865304	973.71	924.307	protein_coding	RANBP10
ENSG00000139842.14	0.000265763	0.0210358	-0.0715912	3315.37	3293.39	0.00939308	0.0503587	-0.0468394	2807.76	2752.71	protein_coding	CUL4A
ENSG00000131844.15	0.00026945	0.0210358	-0.0512984	758.759	761.327	1.89126e-05	0.000401579	-0.0528887	585.551	568.25	protein_coding	MCCC2
ENSG00000109466.13	0.000270867	0.0210747	0.101511	3512.58	3132.03	4.33404e-07	1.79053e-05	0.122863	2438.98	2723.17	protein_coding	KLHL2
ENSG00000153560.11	0.000274108	0.0212682	-0.0553839	2056.49	2036.78	9.03149e-09	8.12453e-07	-0.0730589	1497.28	1443.85	protein_coding	UBP1
ENSG00000260550.2	0.000275188	0.0212935	0.188274	27.7659	22.6087	7.67285e-05	0.00123132	0.189635	16.5774	20.1395	lincRNA	AC136618.1
ENSG00000046647.13	0.00027734	0.0214014	-0.0628365	264.564	274.959	0.0144252	0.0694322	-0.0380526	212.973	202.518	protein_coding	GEMIN8
ENSG00000001084.12	0.000279313	0.0214949	-0.106966	1375.79	1376.44	0.00108996	0.00984667	-0.0851146	1003	965.467	protein_coding	GCLC
ENSG00000139514.12	0.000280231	0.0215035	-0.0823523	550.205	552.343	0.000484851	0.00523098	-0.0712742	413.155	397.52	protein_coding	SLC7A1
ENSG00000139132.14	0.000283671	0.0216533	0.10514	3488.67	3028.41	1.90342e-05	0.00040347	0.102155	2519.55	2821.3	protein_coding	FGD4
ENSG00000155926.13	0.000285523	0.0217359	0.0861712	16063.2	14371.8	9.49476e-07	3.43133e-05	0.100867	12747.7	14115.2	protein_coding	SLA
ENSG00000161040.16	0.000287966	0.021863	0.156581	738.624	624.3	2.4286e-05	0.000491271	0.158936	494.843	578.17	protein_coding	FBXL13
ENSG00000223336.1	0.000294632	0.0222045	0.132344	63.0309	55.286	0.00823141	0.0456768	0.0885614	42.5288	46.6079	snRNA	RNU2-6P
ENSG00000238713.1	0.000295609	0.0222045	-0.0679672	29.7822	29.968	1.96544e-11	8.11969e-09	-0.135838	19.9912	18.4474	misc_RNA	RF00019
ENSG00000248323.6	0.000293935	0.0222045	0.109102	11440.1	9966.96	3.11597e-07	1.38302e-05	0.132127	7943.38	9000.84	antisense	LUCAT1
ENSG00000206344.7	0.000295219	0.0222045	0.109498	5990.33	5401.07	8.80098e-15	4.68432e-11	0.199111	4095.6	4805.31	lincRNA	HCG27
ENSG00000132965.9	0.000303832	0.0226415	0.127906	4176.4	3683.86	8.21125e-12	4.94766e-09	0.214001	3604.13	4355.05	protein_coding	ALOX5AP
ENSG00000102900.12	0.000307612	0.0228028	-0.0474657	1014.46	1002.43	0.0291456	0.11498	-0.0250455	812.387	810.874	protein_coding	NUP93
ENSG00000186431.18	0.00031024	0.0228975	0.12285	1064.79	923.522	0.000104848	0.00156464	0.115644	765.759	868.657	protein_coding	FCAR
ENSG00000133800.8	0.000312861	0.0230108	0.151083	67.5445	56.9886	0.00425149	0.0279595	0.118534	49.0664	54.6974	protein_coding	LYVE1
ENSG00000215297.3	0.000314812	0.0230941	-0.0880994	17.4356	17.9405	0.00901547	0.0488229	-0.0646636	13.104	12.6684	processed_pseudogene	AL354941.1
ENSG00000100266.18	0.000318923	0.0232557	0.0974838	6386.6	5584.3	1.51774e-10	3.56389e-08	0.146283	4709.52	5322.48	protein_coding	PACSIN2
ENSG00000283525.1	0.000318968	0.0232557	0.273025	8.89111	6.95881	0.010733	0.0556337	0.163958	6.4115	7.46053	transcribed_unprocessed_pseudogene	AC005622.1
ENSG00000107951.14	0.000319485	0.0232557	-0.0335015	863.559	840.089	0.00886845	0.0482148	-0.0232834	695.29	690.603	protein_coding	MTPAP
ENSG00000260086.2	0.000321181	0.0233191	0.134118	27.6207	23.746	0.00605974	0.0363346	0.0977221	18.5619	20.75	lincRNA	AC007611.1
ENSG00000130600.18	0.000328277	0.0237123	0.2766	66.5136	47.3135	0.0146816	0.0703989	0.167049	47.0199	55.4066	processed_transcript	H19
ENSG00000127954.12	0.00033318	0.023993	0.13232	14213	12378.9	7.01267e-10	1.0978e-07	0.18813	10814.6	12574.5	protein_coding	STEAP4
ENSG00000279447.1	0.000338853	0.0241787	0.172614	369.86	310.819	0.000172925	0.00231158	0.159524	242.407	283.962	TEC	AL118508.4
ENSG00000101474.11	0.000347021	0.0241787	0.106043	5515.36	4767.35	4.07965e-08	2.68073e-06	0.141171	4039.15	4615.21	protein_coding	APMAP
ENSG00000083444.16	0.000342001	0.0241787	0.0985878	768.982	667.968	3.74486e-06	0.000106021	0.112426	634.17	720.797	protein_coding	PLOD1
ENSG00000252652.1	0.000347181	0.0241787	-0.0769073	22.7858	22.9611	0.00161243	0.0132782	-0.06425	19.4469	18.5513	misc_RNA	RF00019
ENSG00000065491.8	0.000345264	0.0241787	-0.123398	625.005	639.748	0.0315743	0.121808	-0.0657405	494.677	481.292	protein_coding	TBC1D22B
ENSG00000183690.12	0.000354531	0.0243626	0.108743	232.423	217.789	1.21829e-06	4.16555e-05	0.124864	164.181	177.593	protein_coding	EFHC2
ENSG00000165071.14	0.000354251	0.0243626	0.0904747	5282.73	4748.06	3.51238e-12	2.8761e-09	0.143027	4075.81	4592.99	protein_coding	TMEM71
ENSG00000234663.6	0.000353975	0.0243626	-0.0754896	1234.96	1249.68	1.3279e-06	4.43582e-05	-0.102442	999.281	925.553	lincRNA	LINC01934
ENSG00000243664.1	0.000356745	0.0244552	0.1807	44.5318	36.7323	1.41358e-07	7.35225e-06	0.226126	29	35.3289	processed_pseudogene	RPS29P12
ENSG00000258352.1	0.00036486	0.024507	-0.101391	47.9946	50.1739	0.0285902	0.113504	-0.0586378	43.646	40.875	transcribed_processed_pseudogene	AC119044.1
ENSG00000163563.7	0.00036428	0.024507	0.131527	35200.3	30648	8.73486e-11	2.30535e-08	0.19909	29943.9	35076.1	protein_coding	MNDA
ENSG00000105810.9	0.000363182	0.024507	-0.0845113	2646.09	2783.36	6.14426e-05	0.00103654	-0.073995	2194.65	2032.4	protein_coding	CDK6
ENSG00000282602.1	0.000373456	0.0248962	0.124752	85.2087	72.611	1.93664e-08	1.47605e-06	0.173888	58.1637	67.2158	lincRNA	Z82244.2
ENSG00000257127.6	0.000376365	0.025011	0.0999556	153.377	134.444	0.0460356	0.159452	0.0612889	98.8097	109.082	processed_transcript	CLLU1
ENSG00000111058.7	0.000380136	0.0251131	0.127874	962.056	834.7	1.08085e-11	5.56725e-09	0.211585	653.358	776.634	protein_coding	ACSS3
ENSG00000261338.2	0.00038182	0.0251131	0.053192	497.241	448.796	2.40663e-06	7.30568e-05	0.0600068	391.007	415.42	sense_overlapping	AC021016.2
ENSG00000157800.17	0.000384126	0.0251131	0.104728	1526.91	1350.54	0.000181412	0.0024079	0.0962108	1066.58	1175.48	protein_coding	SLC37A3
ENSG00000100368.13	0.000388198	0.0253207	0.112192	8775.44	7395.28	2.25903e-09	2.82146e-07	0.161693	6869.51	7739.41	protein_coding	CSF2RB
ENSG00000272689.1	0.000391541	0.0253847	-0.0815073	19.6788	20.0503	6.63744e-05	0.0010977	-0.0965846	13.9071	13.0776	sense_intronic	AC004832.4
ENSG00000012232.8	0.000391876	0.0253847	0.0967835	2971.1	2582.73	6.36852e-08	3.85156e-06	0.117923	2037.2	2294.81	protein_coding	EXTL3
ENSG00000100504.16	0.000393137	0.0254081	0.120351	8968.07	7626.58	7.41456e-08	4.31131e-06	0.154684	6872.52	7891.78	protein_coding	PYGL
ENSG00000276900.1	0.000396866	0.0255323	0.116658	740.045	669.247	3.2487e-09	3.70525e-07	0.182398	533.777	622.864	antisense	AC023157.3
ENSG00000105767.2	0.000399795	0.0256623	0.117415	83.3811	72.3753	0.000169984	0.00228278	0.124268	62.5619	68.9539	protein_coding	CADM4
ENSG00000173535.14	0.00040392	0.0258683	0.120112	10873.8	9523.19	1.9832e-11	8.11969e-09	0.194913	8028.43	9432.38	protein_coding	TNFRSF10C
ENSG00000013523.9	0.000406973	0.0260049	-0.0563197	680.214	675.62	0.000812927	0.00783132	-0.0477311	487.181	475.053	protein_coding	ANGEL1
ENSG00000138363.14	0.000416206	0.0264156	-0.0632783	416.381	427.057	9.38202e-05	0.00143356	-0.0659994	319.223	302.482	protein_coding	ATIC
ENSG00000130559.18	0.000417302	0.0264257	-0.0385223	885.63	865.92	0.000186961	0.00246515	-0.0376763	698.305	689.603	protein_coding	CAMSAP1
ENSG00000086232.12	0.000424992	0.0267925	-0.151597	4060.6	4200.51	0.00396514	0.026619	-0.108471	3175	2953.02	protein_coding	EIF2AK1
ENSG00000125735.10	0.000428261	0.0269385	0.0901955	2514.18	2243.72	8.57508e-13	1.01424e-09	0.15638	2058.11	2373.2	protein_coding	TNFSF14
ENSG00000135932.10	0.000431549	0.027085	0.0768412	8356.91	7464.38	9.33986e-08	5.17827e-06	0.101448	6395.14	6962.81	protein_coding	CAB39
ENSG00000257094.1	0.000433035	0.027118	0.0819221	20.4828	18.7849	1.29959e-09	1.77665e-07	0.128357	16.8562	18.8895	processed_pseudogene	AC016957.1
ENSG00000007968.6	0.000435737	0.027179	-0.193787	1229.85	1255.78	0.0149311	0.0713598	-0.116373	1067.82	1000.57	protein_coding	E2F2
ENSG00000141968.7	0.000435934	0.027179	0.0728976	5266.4	4639.35	1.05942e-06	3.72607e-05	0.0854767	4340.21	4701.68	protein_coding	VAV1
ENSG00000125124.11	0.000449899	0.0278651	-0.0680644	1077.15	1088.77	0.00130816	0.0113306	-0.0584158	775.914	752.062	protein_coding	BBS2
ENSG00000120659.14	0.000454815	0.0279888	0.195528	28.6915	23.3684	0.0431008	0.152488	0.0994764	17.0354	18.2671	protein_coding	TNFSF11
ENSG00000259626.2	0.000454869	0.0279888	0.162482	95.0508	83.4737	0.0474895	0.162723	0.0781179	73.365	79.6987	processed_pseudogene	MTND3P12
ENSG00000203804.4	0.000458575	0.0281555	0.10844	1891.78	1629.46	3.02349e-05	0.000580608	0.110692	1200.69	1324.75	processed_transcript	ADAMTSL4-AS1
ENSG00000131873.6	0.000462778	0.0282994	0.0974791	2910.95	2628.55	2.01693e-07	9.74444e-06	0.119987	2108.92	2338.59	protein_coding	CHSY1
ENSG00000129749.3	0.000465666	0.0283444	0.0854823	115.75	102.05	7.29302e-05	0.00118465	0.0882012	86.385	93.5395	protein_coding	CHRNA10
ENSG00000135842.16	0.000471791	0.0285122	0.121417	25544	21713.5	2.6823e-05	0.000529742	0.126469	20020	22093	protein_coding	FAM129A
ENSG00000230839.1	0.000490906	0.0291068	0.140018	116.831	95.1556	0.0159259	0.0746504	0.0802654	88.8208	96.7158	lincRNA	AL121760.1
ENSG00000123700.4	0.000493573	0.0291632	0.124795	5885	5149.42	1.75247e-07	8.74457e-06	0.162566	4413.86	4940.91	protein_coding	KCNJ2
ENSG00000174718.11	0.000498645	0.0292069	0.114354	37949.1	33898.3	4.62413e-11	1.53825e-08	0.168689	32604.5	37260.9	protein_coding	KIAA1551
ENSG00000113749.7	0.000498162	0.0292069	0.121457	2847.11	2429.87	0.000325688	0.00383513	0.10537	2207.06	2460.95	protein_coding	HRH2
ENSG00000228506.1	0.000496507	0.0292069	-0.0765462	181.773	189.529	0.0049512	0.0313413	-0.0580723	165.956	161.076	antisense	AL513550.1
ENSG00000170525.20	0.000508205	0.0295943	0.122419	2208.83	1868.7	0.00378421	0.025718	0.0869096	1586.88	1727.78	protein_coding	PFKFB3
ENSG00000259182.5	0.000515602	0.0297794	0.174317	33.1869	28.6064	0.00769652	0.043365	0.126517	23.3783	25.7237	lincRNA	AC019254.1
ENSG00000261529.1	0.00052096	0.0299054	-0.0776778	160.708	163.465	0.00183863	0.0147049	-0.0730863	105.71	101.682	sense_intronic	AC100774.1
ENSG00000048991.16	0.000523603	0.0299962	-0.0414812	929.668	913.428	1.25047e-07	6.63353e-06	-0.0645191	716.162	691.28	protein_coding	R3HDM1
ENSG00000157551.18	0.000532688	0.0303321	0.137005	9077.67	7771.11	0.000475576	0.00514134	0.118043	6977.21	7777.88	protein_coding	KCNJ15
ENSG00000196083.9	0.00053441	0.0303494	0.103556	5701.17	5062.5	1.15901e-07	6.23115e-06	0.146019	4011.65	4456.07	protein_coding	IL1RAP
ENSG00000103047.7	0.000544176	0.0305602	-0.0454902	1272.96	1271.84	0.00107593	0.00974468	-0.0373906	994.369	977.118	protein_coding	TANGO6
ENSG00000183621.15	0.000547515	0.0305602	0.102391	1084.7	971.943	6.5226e-06	0.0001688	0.109964	802.465	873.717	protein_coding	ZNF438
ENSG00000266668.1	0.000548625	0.0305618	-0.0986681	38.5808	40.4966	0.00152476	0.0127243	-0.0884375	30.4093	28.6118	miRNA	MIR5692C2
ENSG00000084693.15	0.000551579	0.030649	-0.0834828	110.744	107.698	0.00315645	0.0222963	-0.12054	89.6128	84.4618	protein_coding	AGBL5
ENSG00000143384.12	0.000555184	0.0306851	0.0853607	68016.9	61470.5	1.35143e-08	1.10379e-06	0.119244	49233.3	54227	protein_coding	MCL1
ENSG00000168852.12	0.000559383	0.0307966	-0.0971601	81.5263	84.0046	3.28087e-07	1.43387e-05	-0.131506	60.9181	56.3092	transcribed_unprocessed_pseudogene	TPTE2P5
ENSG00000185950.8	0.000565694	0.0308434	0.107481	1731.39	1480.78	7.24519e-06	0.000183195	0.125291	1382.82	1571.92	protein_coding	IRS2
ENSG00000170871.11	0.000570379	0.0309198	0.0807051	6814.01	6121.3	2.70536e-11	1.00713e-08	0.126951	4984.71	5614.75	protein_coding	KIAA0232
ENSG00000075426.11	0.00057648	0.0311785	0.110506	5246.88	4413.84	3.65259e-05	0.000680943	0.105541	3632.95	4023.55	protein_coding	FOSL2
ENSG00000241721.1	0.000578614	0.0311867	0.15074	150.646	133.007	8.30609e-09	7.55712e-07	0.237043	97.0133	116.842	processed_pseudogene	SUMO1P1
ENSG00000260621.1	0.000587171	0.0313487	0.11371	70.323	61.4622	2.67846e-08	1.8924e-06	0.158871	46.3894	53.0789	antisense	AC092140.1
ENSG00000213390.10	0.000586627	0.0313487	0.0740512	2576.35	2317.45	1.96545e-05	0.000414302	0.0817279	1760.26	1923.76	protein_coding	ARHGAP19
ENSG00000140575.12	0.000583533	0.0313487	0.0857446	26472.8	22918	0.000264189	0.00326	0.0829679	20509.1	22188.7	protein_coding	IQGAP1
ENSG00000106771.12	0.000586673	0.0313487	-0.0675721	2385.56	2444.54	4.28867e-07	1.77868e-05	-0.0805591	1736.85	1639.72	protein_coding	TMEM245
ENSG00000278861.1	0.000589005	0.0313696	-0.0667309	27.951	27.8124	0.000156361	0.00213663	-0.0825988	17.0243	16.1763	TEC	AC117503.2
ENSG00000120215.9	0.000598109	0.0317526	0.0790901	183.851	168.934	0.00411038	0.0273184	0.0678652	128.513	137.778	protein_coding	MLANA
[truncated: 186 more rows]

## Sheet: BRAINCode same direction
	baseMean	log2FoldChange	pvalue	padj	FoldChange	chr	start	end	geneID	score	strand	geneName	geneType	geneDescription	pvalue_PPMI	padj_PPMI	log2FoldChange_PPMI	baseMean_raw.Case_PPMI	baseMean_raw.Control_PPMI	log2FoldChange_PDBF	pvalue_PDBF	padj_PDBF	baseMean_raw.Control_PDBF	baseMean_raw.Case_PDBF
[truncated: 44 more rows]
