# Supplementary material for: Transcriptional pathobiology and multi-omics predictors for Parkinson’s disease
Source: bioRxiv preprint, doi:10.1101/2024.06.18.599639, version 1 (2024-06-21)
Supplement: Table S3 [file 599639_file14.xlsx]

## Sheet: PPMI_UPDRS_DE
	log2FoldChange	lfcSE	stat	pvalue	padj	FoldChange	symbol	geneType
ENSG00000138411.12	0.00851205	0.00118442	7.18668	6.63878e-13	9.60598e-09	1.00592	HECW2	protein_coding
ENSG00000152463.14	0.0111945	0.00155439	7.20183	5.941e-13	9.60598e-09	1.00779	OLAH	protein_coding
ENSG00000259318.1	-0.00411025	0.000580637	-7.07887	1.45337e-12	1.40197e-08	0.997155	AL356801.1	processed_pseudogene
ENSG00000251456.1	0.00847351	0.00131591	6.43929	1.2003e-10	8.68389e-07	1.00589	AC113398.2	sense_intronic
ENSG00000281162.2	0.00969189	0.00151378	6.40243	1.52922e-10	8.85081e-07	1.00674	LINC01127	lincRNA
ENSG00000093134.14	0.00858829	0.00136695	6.28282	3.32483e-10	1.37453e-06	1.00597	VNN3	protein_coding
ENSG00000115604.10	0.00684793	0.00108974	6.28402	3.29921e-10	1.37453e-06	1.00476	IL18R1	protein_coding
ENSG00000134873.9	0.00656218	0.0010628	6.17444	6.63997e-10	2.40192e-06	1.00456	CLDN10	protein_coding
ENSG00000270544.1	0.00588779	0.000983128	5.98884	2.11346e-09	6.7957e-06	1.00409	AC008555.3	lincRNA
ENSG00000102010.14	0.0109645	0.00183872	5.96313	2.47456e-09	7.16112e-06	1.00763	BMX	protein_coding
ENSG00000108582.11	0.00595584	0.00100841	5.90616	3.50177e-09	8.03654e-06	1.00414	CPD	protein_coding
ENSG00000259562.2	-0.00223897	0.000378862	-5.90973	3.42677e-09	8.03654e-06	0.998449	AC090607.2	transcribed_processed_pseudogene
ENSG00000163235.15	0.0070881	0.00120114	5.90113	3.61018e-09	8.03654e-06	1.00493	TGFA	protein_coding
ENSG00000264160.1	-0.00735718	0.00126222	-5.82874	5.58463e-09	8.19458e-06	0.994913	MIR4762	miRNA
ENSG00000101474.11	0.00626907	0.00107715	5.82004	5.88345e-09	8.19458e-06	1.00435	APMAP	protein_coding
ENSG00000139112.10	0.00559406	0.000953113	5.86925	4.3777e-09	8.19458e-06	1.00389	GABARAPL1	protein_coding
ENSG00000059804.15	0.00699783	0.00120274	5.81826	5.94651e-09	8.19458e-06	1.00486	SLC2A3	protein_coding
ENSG00000188895.11	0.00536627	0.00091876	5.84077	5.19597e-09	8.19458e-06	1.00373	MSL1	protein_coding
ENSG00000155744.9	0.0069247	0.00118242	5.8564	4.73008e-09	8.19458e-06	1.00481	FAM126B	protein_coding
ENSG00000113368.11	0.0077868	0.00133637	5.82683	5.64911e-09	8.19458e-06	1.00541	LMNB1	protein_coding
ENSG00000157800.17	0.00624563	0.00107101	5.83151	5.49282e-09	8.19458e-06	1.00434	SLC37A3	protein_coding
ENSG00000103569.9	0.00737377	0.00128475	5.73947	9.49753e-09	1.02612e-05	1.00512	AQP9	protein_coding
ENSG00000102580.14	0.00515586	0.000896845	5.74889	8.98307e-09	1.02612e-05	1.00358	DNAJC3	protein_coding
ENSG00000166130.14	0.00732088	0.00127722	5.73187	9.93316e-09	1.02612e-05	1.00509	IKBIP	protein_coding
ENSG00000140563.14	0.00584226	0.00101598	5.75036	8.90533e-09	1.02612e-05	1.00406	MCTP2	protein_coding
ENSG00000233246.1	0.00654915	0.00113638	5.76316	8.25553e-09	1.02612e-05	1.00455	AL513327.2	antisense
ENSG00000115828.16	0.00812938	0.00141973	5.726	1.02829e-08	1.02612e-05	1.00565	QPCT	protein_coding
ENSG00000151726.13	0.00854363	0.00149095	5.73032	1.00243e-08	1.02612e-05	1.00594	ACSL1	protein_coding
ENSG00000173281.4	0.00668852	0.00116276	5.75227	8.80536e-09	1.02612e-05	1.00465	PPP1R3B	protein_coding
ENSG00000248719.1	0.0044878	0.000789808	5.68214	1.33017e-08	1.24508e-05	1.00312	AC021127.1	antisense
ENSG00000170837.2	0.00772373	0.00136047	5.67725	1.36875e-08	1.24508e-05	1.00537	GPR27	protein_coding
ENSG00000096063.15	0.00585481	0.00103146	5.67625	1.37678e-08	1.24508e-05	1.00407	SRPK1	protein_coding
ENSG00000160588.9	0.00617862	0.00109207	5.65768	1.53429e-08	1.28932e-05	1.00429	MPZL3	protein_coding
ENSG00000167434.9	0.00920349	0.0016266	5.65811	1.53053e-08	1.28932e-05	1.0064	CA4	protein_coding
ENSG00000011198.9	0.00677015	0.00119722	5.6549	1.55936e-08	1.28932e-05	1.0047	ABHD5	protein_coding
ENSG00000268734.1	0.00662958	0.00117873	5.62433	1.86229e-08	1.48736e-05	1.00461	AC245128.3	lincRNA
ENSG00000051620.10	0.00456753	0.000813372	5.61555	1.95939e-08	1.48736e-05	1.00317	HEBP2	protein_coding
ENSG00000271554.1	0.00733513	0.00130816	5.60723	2.05586e-08	1.48736e-05	1.0051	AL138787.2	antisense
ENSG00000273306.1	-0.00423324	0.00075473	-5.60895	2.03563e-08	1.48736e-05	0.99707	AC018690.1	antisense
ENSG00000006652.13	0.00636626	0.00113463	5.61086	2.01321e-08	1.48736e-05	1.00442	IFRD1	protein_coding
ENSG00000157315.4	-0.00301729	0.000539151	-5.59637	2.18887e-08	1.54497e-05	0.997911	TMED6	protein_coding
ENSG00000139132.14	0.00587608	0.00105343	5.57804	2.43246e-08	1.63704e-05	1.00408	FGD4	protein_coding
ENSG00000112303.13	0.00873934	0.00156666	5.57833	2.42844e-08	1.63704e-05	1.00608	VNN2	protein_coding
ENSG00000241721.1	0.00882036	0.00159023	5.54658	2.91317e-08	1.68653e-05	1.00613	SUMO1P1	processed_pseudogene
ENSG00000272056.1	-0.00351546	0.000633812	-5.54653	2.91395e-08	1.68653e-05	0.997566	AC013472.3	antisense
ENSG00000145491.11	0.00673098	0.00121328	5.54774	2.89381e-08	1.68653e-05	1.00468	ROPN1L	protein_coding
ENSG00000236785.1	0.0070496	0.00126924	5.55418	2.78919e-08	1.68653e-05	1.0049	SDR42E1P5	processed_pseudogene
ENSG00000135378.3	0.00711061	0.00128135	5.54931	2.868e-08	1.68653e-05	1.00494	PRRG4	protein_coding
ENSG00000163162.8	0.00536643	0.000965888	5.55595	2.76102e-08	1.68653e-05	1.00373	RNF149	protein_coding
ENSG00000268170.2	0.00818105	0.00147351	5.55208	2.82286e-08	1.68653e-05	1.00569	AC073342.2	antisense
ENSG00000236345.1	0.00609369	0.00110596	5.50985	3.59138e-08	1.99867e-05	1.00423	AL354719.2	antisense
ENSG00000188690.13	-0.00249031	0.000451858	-5.51127	3.56262e-08	1.99867e-05	0.998275	UROS	protein_coding
ENSG00000181016.9	0.00644392	0.00117036	5.50594	3.67198e-08	2.00497e-05	1.00448	LSMEM1	protein_coding
ENSG00000260064.1	-0.00391989	0.00071306	-5.49728	3.8569e-08	2.02936e-05	0.997287	AC092332.1	sense_intronic
ENSG00000264370.1	-0.00576013	0.00104776	-5.49758	3.85045e-08	2.02936e-05	0.996015	MIR3125	miRNA
ENSG00000109466.13	0.00556878	0.00101515	5.48568	4.11884e-08	2.12849e-05	1.00387	KLHL2	protein_coding
ENSG00000176076.7	0.0106104	0.00194243	5.46245	4.69599e-08	2.38416e-05	1.00738	KCNE5	protein_coding
ENSG00000115590.13	0.00773328	0.00141822	5.45279	4.95864e-08	2.47411e-05	1.00537	IL1R2	protein_coding
ENSG00000179299.16	0.00691018	0.00127	5.44107	5.29619e-08	2.55444e-05	1.0048	NSUN7	protein_coding
ENSG00000105835.11	0.00793839	0.00145888	5.44144	5.28506e-08	2.55444e-05	1.00552	NAMPT	protein_coding
ENSG00000225873.4	0.00752002	0.00138524	5.42869	5.67684e-08	2.69315e-05	1.00523	C3orf86	transcribed_unitary_pseudogene
ENSG00000163421.8	0.0087784	0.00162253	5.41032	6.29128e-08	2.9365e-05	1.0061	PROK2	protein_coding
ENSG00000273644.1	0.00875569	0.00161995	5.40492	6.48389e-08	2.94678e-05	1.00609	AC215522.1	processed_pseudogene
ENSG00000173930.8	0.00578281	0.00107065	5.40122	6.61877e-08	2.94678e-05	1.00402	SLCO4C1	protein_coding
ENSG00000263403.1	0.00639882	0.00118437	5.40271	6.564e-08	2.94678e-05	1.00445	MIR4673	miRNA
ENSG00000174007.7	0.00650616	0.00121309	5.3633	8.17154e-08	3.44645e-05	1.00452	CEP19	protein_coding
ENSG00000158089.14	0.0106621	0.00198853	5.36181	8.23916e-08	3.44645e-05	1.00742	GALNT14	protein_coding
ENSG00000274677.1	-0.00339304	0.000632836	-5.36164	8.24694e-08	3.44645e-05	0.997651	AC040169.3	sense_intronic
ENSG00000277763.1	0.00738317	0.00137754	5.35969	8.33655e-08	3.44645e-05	1.00513	AL138995.1	lincRNA
ENSG00000215114.8	0.00493421	0.000920483	5.36046	8.30113e-08	3.44645e-05	1.00343	UBXN2B	protein_coding
ENSG00000275401.1	-0.00323096	0.000604045	-5.34886	8.85079e-08	3.55504e-05	0.997763	AL391095.3	lincRNA
ENSG00000185261.14	0.00446019	0.000833748	5.34956	8.81675e-08	3.55504e-05	1.0031	KIAA0825	protein_coding
ENSG00000148572.15	0.00590134	0.00110378	5.34649	8.96776e-08	3.55504e-05	1.0041	NRBF2	protein_coding
ENSG00000200095.1	-0.00595616	0.00111482	-5.34269	9.15792e-08	3.58136e-05	0.99588	RNU6-181P	snRNA
ENSG00000057704.12	0.005978	0.00111997	5.33764	9.41639e-08	3.63335e-05	1.00415	TMCC3	protein_coding
ENSG00000253519.1	0.00551606	0.00103649	5.32185	1.02719e-07	3.91129e-05	1.00383	AC106801.1	antisense
ENSG00000274068.1	-0.0051769	0.000974154	-5.31425	1.07098e-07	4.02508e-05	0.996418	AL449266.1	protein_coding
ENSG00000186205.12	0.00674109	0.0012767	5.28007	1.29133e-07	4.77589e-05	1.00468	2023-03-01	protein_coding
ENSG00000138772.12	0.0103008	0.00195153	5.27832	1.30376e-07	4.77589e-05	1.00717	ANXA3	protein_coding
ENSG00000226842.1	0.00488127	0.000929888	5.24931	1.52668e-07	5.45441e-05	1.00339	AL158834.1	antisense
ENSG00000135932.10	0.00417706	0.000795636	5.24996	1.5213e-07	5.45441e-05	1.0029	CAB39	protein_coding
ENSG00000059728.10	0.00602562	0.0011519	5.23101	1.68587e-07	5.94969e-05	1.00419	MXD1	protein_coding
ENSG00000244436.2	0.00681596	0.00130376	5.22793	1.71422e-07	5.97683e-05	1.00474	AC023050.1	processed_pseudogene
ENSG00000214293.8	0.003416	0.000653821	5.22467	1.74467e-07	6.01058e-05	1.00237	APTR	lincRNA
ENSG00000263993.2	0.00610968	0.00117005	5.22172	1.77271e-07	6.03535e-05	1.00424	RN7SL786P	misc_RNA
ENSG00000176788.8	0.00750354	0.00143795	5.21822	1.80654e-07	6.07901e-05	1.00521	BASP1	protein_coding
ENSG00000111261.13	0.005974	0.00114616	5.21218	1.86634e-07	6.20804e-05	1.00415	MANSC1	protein_coding
ENSG00000171049.8	0.00712296	0.00136954	5.20099	1.98226e-07	6.50598e-05	1.00495	FPR2	protein_coding
ENSG00000196549.10	0.00781815	0.00150371	5.19926	2.00087e-07	6.50598e-05	1.00543	MME	protein_coding
ENSG00000203721.6	0.00550139	0.00105913	5.19426	2.0554e-07	6.60902e-05	1.00382	LINC00862	lincRNA
ENSG00000103154.9	0.0101704	0.00195969	5.1898	2.10514e-07	6.69459e-05	1.00707	NECAB2	protein_coding
ENSG00000162702.7	0.00556336	0.00107421	5.17902	2.23052e-07	6.99847e-05	1.00386	ZNF281	protein_coding
ENSG00000120868.13	0.00465036	0.000898191	5.17748	2.24907e-07	6.99847e-05	1.00323	APAF1	protein_coding
ENSG00000231327.1	0.00441487	0.00085335	5.17358	2.29649e-07	7.07001e-05	1.00306	LINC01816	lincRNA
ENSG00000100504.16	0.00639743	0.00123832	5.16624	2.38848e-07	7.25149e-05	1.00444	PYGL	protein_coding
ENSG00000213390.10	0.00405521	0.000785146	5.16491	2.40555e-07	7.25149e-05	1.00281	ARHGAP19	protein_coding
ENSG00000186431.18	0.00638985	0.00124184	5.14546	2.66868e-07	7.96173e-05	1.00444	FCAR	protein_coding
ENSG00000115271.10	0.00747524	0.00145469	5.13871	2.76625e-07	8.16861e-05	1.00519	GCA	protein_coding
ENSG00000167536.13	0.00581584	0.00113225	5.13655	2.79832e-07	8.17986e-05	1.00404	DHRS13	protein_coding
ENSG00000131873.6	0.00521071	0.00101523	5.13252	2.85884e-07	8.2732e-05	1.00362	CHSY1	protein_coding
ENSG00000189134.3	0.0072466	0.0014142	5.12418	2.98836e-07	8.5624e-05	1.00504	NKAPL	protein_coding
ENSG00000188158.15	0.00559365	0.00109231	5.12094	3.04016e-07	8.62541e-05	1.00388	NHS	protein_coding
ENSG00000112096.17	0.0055835	0.00109239	5.11127	3.19994e-07	8.99057e-05	1.00388	SOD2	protein_coding
ENSG00000276900.1	0.00612973	0.00120092	5.1042	3.322e-07	9.24378e-05	1.00426	AC023157.3	antisense
ENSG00000145882.10	-0.00347333	0.000680806	-5.10179	3.36456e-07	9.2582e-05	0.997595	PCYOX1L	protein_coding
ENSG00000127954.12	0.0068644	0.00134588	5.1003	3.39116e-07	9.2582e-05	1.00477	STEAP4	protein_coding
ENSG00000103194.15	0.00457515	0.00090413	5.06028	4.18642e-07	0.000113225	1.00318	USP10	protein_coding
ENSG00000100985.7	0.0106883	0.00211399	5.05598	4.28176e-07	0.000114731	1.00744	MMP9	protein_coding
ENSG00000257094.1	0.0041469	0.000821051	5.05073	4.40132e-07	0.000116853	1.00288	AC016957.1	processed_pseudogene
ENSG00000180953.11	0.0055328	0.00109601	5.04814	4.46127e-07	0.000117368	1.00384	ST20	protein_coding
ENSG00000109381.19	0.00389298	0.00077214	5.04181	4.61158e-07	0.000120229	1.0027	ELF2	protein_coding
ENSG00000132825.6	0.00426359	0.000847229	5.03239	4.84403e-07	0.000124679	1.00296	PPP1R3D	protein_coding
ENSG00000184178.15	-0.00307783	0.00061172	-5.03143	4.86842e-07	0.000124679	0.997869	SCFD2	protein_coding
ENSG00000180822.11	-0.00289554	0.000576166	-5.02553	5.02038e-07	0.000127443	0.997995	PSMG4	protein_coding
ENSG00000123700.4	0.00655725	0.00130733	5.01575	5.28256e-07	0.00012797	1.00456	KCNJ2	protein_coding
ENSG00000284930.1	0.0061519	0.00122561	5.01946	5.18167e-07	0.00012797	1.00427	AC005280.2	lincRNA
ENSG00000163739.4	0.00719521	0.00143477	5.01489	5.30645e-07	0.00012797	1.005	CXCL1	protein_coding
ENSG00000201441.1	0.0077567	0.00154565	5.0184	5.21024e-07	0.00012797	1.00539	RNU6-646P	snRNA
ENSG00000230257.2	0.00782776	0.00156055	5.01602	5.27539e-07	0.00012797	1.00544	NFE4	protein_coding
ENSG00000174125.7	0.00615507	0.00122616	5.0198	5.17245e-07	0.00012797	1.00428	TLR1	protein_coding
ENSG00000223819.2	0.00566726	0.00113387	4.99818	5.78746e-07	0.000135067	1.00394	PPIAP89	processed_pseudogene
ENSG00000091317.7	0.00574732	0.00114954	4.99967	5.74277e-07	0.000135067	1.00399	CMTM6	protein_coding
ENSG00000177125.5	0.0044302	0.000885968	5.00041	5.72082e-07	0.000135067	1.00308	ZBTB34	protein_coding
ENSG00000155099.7	0.00587329	0.00117492	4.99889	5.76612e-07	0.000135067	1.00408	PIP4P2	protein_coding
ENSG00000143815.14	0.00488654	0.000978546	4.99368	5.92409e-07	0.000136061	1.00339	LBR	protein_coding
ENSG00000249662.6	0.00716224	0.00143419	4.99391	5.91684e-07	0.000136061	1.00498	LINC02218	protein_coding
ENSG00000174718.11	0.00598365	0.00119881	4.99132	5.99672e-07	0.000136645	1.00416	KIAA1551	protein_coding
ENSG00000065559.14	0.00426702	0.000857047	4.97875	6.39967e-07	0.000144687	1.00296	MAP2K4	protein_coding
ENSG00000254928.1	0.00654113	0.00131601	4.97044	6.67997e-07	0.000149854	1.00454	AP001372.3	antisense
ENSG00000185950.8	0.0056474	0.00113713	4.96637	6.82191e-07	0.000151861	1.00392	IRS2	protein_coding
ENSG00000143384.12	0.00447124	0.000902513	4.95421	7.26229e-07	0.00016043	1.0031	MCL1	protein_coding
ENSG00000111058.7	0.00650019	0.00131377	4.94772	7.50866e-07	0.000163931	1.00452	ACSS3	protein_coding
ENSG00000256229.7	0.00426015	0.000861148	4.94707	7.53404e-07	0.000163931	1.00296	ZNF486	protein_coding
ENSG00000183621.15	0.00534531	0.00108091	4.94519	7.60701e-07	0.000164283	1.00371	ZNF438	protein_coding
ENSG00000119471.14	0.0052686	0.00106753	4.9353	8.00257e-07	0.000171545	1.00366	HSDL2	protein_coding
ENSG00000132965.9	0.00635727	0.00129358	4.91448	8.9017e-07	0.000189416	1.00442	ALOX5AP	protein_coding
ENSG00000272953.1	0.00563624	0.0011476	4.91134	9.04541e-07	0.000191069	1.00391	AC092171.4	lincRNA
ENSG00000169902.14	0.00901767	0.00183814	4.90587	9.30164e-07	0.000195058	1.00627	TPST1	protein_coding
ENSG00000165071.14	0.00453432	0.000924939	4.90229	9.47245e-07	0.000197211	1.00315	TMEM71	protein_coding
ENSG00000246263.2	0.00536136	0.00109595	4.89199	9.98218e-07	0.000206339	1.00372	UBR5-AS1	antisense
ENSG00000266720.2	-0.00429592	0.00087923	-4.88601	1.02902e-06	0.00020971	0.997027	RN7SL14P	misc_RNA
ENSG00000154743.17	-0.00230049	0.000470767	-4.88667	1.02554e-06	0.00020971	0.998407	TSEN2	protein_coding
ENSG00000276136.1	0.00387054	0.000792838	4.88188	1.05079e-06	0.00021265	1.00269	AC016957.2	lincRNA
ENSG00000010539.11	0.00259776	0.000532325	4.88004	1.06065e-06	0.000213153	1.0018	ZNF200	protein_coding
ENSG00000242247.10	0.00307785	0.000631023	4.87755	1.0741e-06	0.000214368	1.00214	ARFGAP3	protein_coding
ENSG00000230928.1	-0.00257694	0.000528896	-4.8723	1.10309e-06	0.000218645	0.998215	AL139241.1	antisense
ENSG00000125827.8	0.00417785	0.00085857	4.86606	1.13847e-06	0.000224123	1.0029	TMX4	protein_coding
ENSG00000069974.15	0.00378881	0.000779212	4.86236	1.15997e-06	0.000224307	1.00263	RAB27A	protein_coding
ENSG00000112062.10	0.00462452	0.000950676	4.86445	1.14773e-06	0.000224307	1.00321	MAPK14	protein_coding
ENSG00000180549.7	0.00591376	0.00121635	4.8619	1.16265e-06	0.000224307	1.00411	FUT7	protein_coding
ENSG00000003402.19	0.00353856	0.000729452	4.85098	1.22855e-06	0.000232372	1.00246	CFLAR	protein_coding
ENSG00000213347.10	0.00580282	0.00119558	4.85358	1.21254e-06	0.000232372	1.00403	MXD3	protein_coding
ENSG00000165030.3	0.00582925	0.00120156	4.85141	1.22585e-06	0.000232372	1.00405	NFIL3	protein_coding
ENSG00000100218.11	0.00846041	0.00174617	4.84511	1.26539e-06	0.000237787	1.00588	RSPH14	protein_coding
ENSG00000253276.2	0.00530804	0.00109669	4.84004	1.29814e-06	0.000242367	1.00369	CCDC71L	protein_coding
ENSG00000136869.14	0.00588667	0.00121788	4.83354	1.34124e-06	0.000247224	1.00409	TLR4	protein_coding
ENSG00000143226.13	0.00556172	0.00115037	4.83473	1.33326e-06	0.000247224	1.00386	FCGR2A	protein_coding
ENSG00000142166.12	0.00375699	0.00077815	4.82811	1.37836e-06	0.000252459	1.00261	IFNAR1	protein_coding
ENSG00000127947.15	0.00397736	0.000824297	4.82515	1.39897e-06	0.000254621	1.00276	PTPN12	protein_coding
ENSG00000257878.1	0.00674724	0.00139927	4.82196	1.42157e-06	0.00025645	1.00469	AC007298.2	antisense
ENSG00000121057.12	-0.00267924	0.000555718	-4.82123	1.42674e-06	0.00025645	0.998145	AKAP1	protein_coding
ENSG00000135766.8	0.00499987	0.00103763	4.81854	1.44612e-06	0.000256744	1.00347	EGLN1	protein_coding
ENSG00000183444.10	-0.00417374	0.000866165	-4.81865	1.44536e-06	0.000256744	0.997111	OR7E38P	unprocessed_pseudogene
ENSG00000144535.19	-0.0025091	0.000521059	-4.81538	1.4692e-06	0.000259143	0.998262	DIS3L2	protein_coding
ENSG00000146955.10	0.00370471	0.000769529	4.81425	1.47754e-06	0.000259143	1.00257	RAB19	protein_coding
ENSG00000120696.8	0.00586038	0.00121772	4.81259	1.48986e-06	0.00025973	1.00407	KBTBD7	protein_coding
ENSG00000106780.8	0.00540805	0.00112415	4.81079	1.50337e-06	0.000260514	1.00376	MEGF9	protein_coding
ENSG00000267512.1	0.00473111	0.000983907	4.80849	1.52071e-06	0.000261952	1.00328	AC011446.1	antisense
ENSG00000247400.3	0.00723049	0.00150578	4.80183	1.57219e-06	0.000269071	1.00502	DNAJC3-DT	lincRNA
ENSG00000038219.12	0.00415871	0.000866324	4.80041	1.58337e-06	0.000269071	1.00289	BOD1L1	protein_coding
ENSG00000198556.13	-0.00236807	0.000493389	-4.79959	1.58994e-06	0.000269071	0.99836	ZNF789	protein_coding
ENSG00000113532.12	0.00495712	0.00103371	4.79547	1.62295e-06	0.000273062	1.00344	ST8SIA4	protein_coding
ENSG00000148187.17	-0.00196817	0.000410587	-4.79354	1.63862e-06	0.000274104	0.998637	MRRF	protein_coding
ENSG00000253981.5	0.00686662	0.00143296	4.79192	1.6519e-06	0.000274737	1.00477	ALG1L13P	transcribed_unprocessed_pseudogene
ENSG00000161040.16	0.00755992	0.00157849	4.78935	1.67326e-06	0.0002767	1.00525	FBXL13	protein_coding
ENSG00000266668.1	-0.00499187	0.00104506	-4.77664	1.78245e-06	0.000293081	0.996546	MIR5692C2	miRNA
ENSG00000223878.1	0.00481358	0.00100917	4.76984	1.84371e-06	0.000299747	1.00334	PPIAP53	processed_pseudogene
ENSG00000221869.4	0.00586189	0.00122876	4.77056	1.83715e-06	0.000299747	1.00407	CEBPD	protein_coding
ENSG00000273320.1	0.00720641	0.00151802	4.74724	2.0621e-06	0.000333381	1.00501	AC007032.1	antisense
ENSG00000114021.11	-0.00241015	0.000507869	-4.74561	2.07884e-06	0.000334219	0.998331	NIT2	protein_coding
ENSG00000270133.1	0.00465394	0.000981189	4.74317	2.10402e-06	0.0003364	1.00323	AC025766.1	sense_intronic
ENSG00000123684.12	0.00418981	0.000883546	4.74204	2.11581e-06	0.000336425	1.00291	LPGAT1	protein_coding
ENSG00000013523.9	-0.00275809	0.000582058	-4.73851	2.15293e-06	0.000340457	0.99809	ANGEL1	protein_coding
ENSG00000170525.20	0.00608833	0.00128673	4.73161	2.22742e-06	0.000347104	1.00423	PFKFB3	protein_coding
ENSG00000135763.9	-0.00267739	0.00056589	-4.73129	2.23095e-06	0.000347104	0.998146	URB2	protein_coding
ENSG00000121957.13	0.00381395	0.00080582	4.733	2.21226e-06	0.000347104	1.00265	GPSM2	protein_coding
ENSG00000084110.10	0.00568387	0.00120243	4.72697	2.27894e-06	0.000352675	1.00395	HAL	protein_coding
ENSG00000136630.12	0.00542431	0.00114784	4.72569	2.29339e-06	0.000353024	1.00377	HLX	protein_coding
ENSG00000083444.16	0.00475021	0.00100553	4.72409	2.31153e-06	0.000353038	1.0033	PLOD1	protein_coding
ENSG00000113161.15	0.00407274	0.000862223	4.72353	2.31789e-06	0.000353038	1.00283	HMGCR	protein_coding
ENSG00000157551.18	0.00682405	0.00144594	4.71946	2.36469e-06	0.000358281	1.00474	KCNJ15	protein_coding
ENSG00000263235.1	-0.00484259	0.00102671	-4.71661	2.39807e-06	0.000361446	0.996649	AC006111.2	sense_overlapping
ENSG00000111802.13	0.00457255	0.000970798	4.71009	2.47607e-06	0.000369764	1.00317	TDP2	protein_coding
ENSG00000146122.16	0.0138964	0.00295049	4.70986	2.47881e-06	0.000369764	1.00968	DAAM2	protein_coding
ENSG00000163563.7	0.00634076	0.00134921	4.69961	2.60657e-06	0.000381631	1.0044	MNDA	protein_coding
ENSG00000140749.8	0.00523304	0.00111319	4.70092	2.58997e-06	0.000381631	1.00363	IGSF6	protein_coding
ENSG00000238719.1	-0.00317896	0.00067663	-4.69823	2.6243e-06	0.000381631	0.997799	RNU7-96P	snRNA
ENSG00000113303.11	0.00641594	0.0013654	4.69894	2.6152e-06	0.000381631	1.00446	BTNL8	protein_coding
ENSG00000277602.1	0.00450651	0.000958952	4.69941	2.60914e-06	0.000381631	1.00313	AC005363.2	lincRNA
ENSG00000228444.2	-0.00345877	0.000736361	-4.69711	2.63866e-06	0.000381802	0.997605	AL137244.1	sense_intronic
ENSG00000261716.2	0.00381648	0.000813867	4.68931	2.74126e-06	0.000394673	1.00265	HIST2H2BC	transcribed_unprocessed_pseudogene
ENSG00000005893.15	0.00452024	0.000964669	4.6858	2.78872e-06	0.000398033	1.00314	LAMP2	protein_coding
ENSG00000212743.2	0.00673607	0.00143763	4.68555	2.7921e-06	0.000398033	1.00468	AL137145.1	lincRNA
ENSG00000164463.12	0.00406915	0.000869359	4.68063	2.85989e-06	0.000405698	1.00282	CREBRF	protein_coding
ENSG00000172007.5	0.00475834	0.001018	4.67421	2.95085e-06	0.000416559	1.0033	RAB33B	protein_coding
ENSG00000174132.8	0.00536416	0.00114828	4.67149	2.99027e-06	0.000420075	1.00373	FAM174A	protein_coding
ENSG00000233461.5	0.00588323	0.00126115	4.66497	3.08657e-06	0.000431508	1.00409	AL445524.1	antisense
ENSG00000259376.1	0.00600562	0.00128807	4.66251	3.12371e-06	0.000434602	1.00417	AC090907.1	antisense
ENSG00000155966.13	0.00552974	0.00118709	4.65822	3.18949e-06	0.00044163	1.00384	AFF2	protein_coding
ENSG00000103196.11	0.00732211	0.00157562	4.64712	3.36598e-06	0.000462835	1.00509	CRISPLD2	protein_coding
ENSG00000112195.8	0.00474212	0.00102056	4.64659	3.37462e-06	0.000462835	1.00329	TREML2	protein_coding
ENSG00000160179.18	0.00656326	0.00141361	4.64289	3.43563e-06	0.00046898	1.00456	ABCG1	protein_coding
ENSG00000005882.11	-0.00463692	0.000999335	-4.64001	3.48393e-06	0.00047334	0.996791	PDK2	protein_coding
ENSG00000250687.6	0.0052378	0.00112948	4.63733	3.5293e-06	0.000477264	1.00364	AC146944.2	transcribed_unprocessed_pseudogene
ENSG00000166523.7	0.00658881	0.00142221	4.63279	3.60775e-06	0.000483354	1.00458	CLEC4E	protein_coding
ENSG00000257335.8	0.00700115	0.00151096	4.63357	3.59405e-06	0.000483354	1.00486	MGAM	protein_coding
ENSG00000196352.15	0.00518235	0.00111929	4.63003	3.6561e-06	0.000487575	1.0036	CD55	protein_coding
ENSG00000235750.9	0.00371289	0.000802867	4.62454	3.75438e-06	0.000498386	1.00258	KIAA0040	protein_coding
ENSG00000258922.1	0.00511279	0.00110595	4.62298	3.7826e-06	0.000499838	1.00355	AC106028.2	sense_intronic
ENSG00000258352.1	-0.00480946	0.00104137	-4.61839	3.86721e-06	0.000506448	0.996672	AC119044.1	transcribed_processed_pseudogene
ENSG00000198734.10	0.00585874	0.00126857	4.61837	3.86762e-06	0.000506448	1.00407	F5	protein_coding
ENSG00000138678.10	0.00569606	0.00123455	4.61389	3.95197e-06	0.000515163	1.00396	GPAT3	protein_coding
ENSG00000039319.16	0.00469881	0.00101893	4.61149	3.99788e-06	0.00051881	1.00326	ZFYVE16	protein_coding
ENSG00000274357.1	0.00539918	0.00117202	4.60671	4.09089e-06	0.00052851	1.00375	RF00017	misc_RNA
ENSG00000116793.15	0.00284017	0.00061772	4.59783	4.26909e-06	0.000544243	1.00197	PHTF1	protein_coding
ENSG00000111052.7	0.00629806	0.0013696	4.59845	4.25639e-06	0.000544243	1.00438	LIN7A	protein_coding
ENSG00000251139.2	0.011583	0.0025185	4.59914	4.24241e-06	0.000544243	1.00806	AC084871.1	antisense
ENSG00000159882.12	0.00495302	0.00107774	4.59575	4.31198e-06	0.0005473	1.00344	ZNF230	protein_coding
ENSG00000231856.2	0.00432615	0.000941673	4.59411	4.3459e-06	0.000549196	1.003	AL162377.1	antisense
ENSG00000196954.13	0.00448964	0.000977753	4.59179	4.39461e-06	0.000552938	1.00312	CASP4	protein_coding
ENSG00000161533.11	0.00485569	0.00105792	4.58985	4.43556e-06	0.000555039	1.00337	ACOX1	protein_coding
ENSG00000112053.13	0.00619354	0.00134959	4.58919	4.44967e-06	0.000555039	1.0043	SLC26A8	protein_coding
ENSG00000167193.7	0.0033788	0.000736456	4.58792	4.47683e-06	0.00055603	1.00234	CRK	protein_coding
ENSG00000222852.1	0.00889062	0.00193865	4.58598	4.51871e-06	0.000558833	1.00618	RF00019	misc_RNA
ENSG00000243273.1	0.0114247	0.00249261	4.58341	4.57455e-06	0.000563332	1.00795	AC020636.1	antisense
ENSG00000254469.7	-0.00245698	0.000536549	-4.57922	4.6671e-06	0.000572293	0.998298	AP002495.1	protein_coding
ENSG00000068366.19	0.00506783	0.001107	4.57798	4.69497e-06	0.000573281	1.00352	ACSL4	protein_coding
ENSG00000137449.15	0.00525871	0.00114911	4.57632	4.73227e-06	0.000575409	1.00365	CPEB2	protein_coding
ENSG00000183666.16	-0.00414016	0.000906197	-4.56872	4.90703e-06	0.000594162	0.997134	GUSBP1	transcribed_unprocessed_pseudogene
ENSG00000125735.10	0.00427032	0.000936472	4.56001	5.1152e-06	0.000611689	1.00296	TNFSF14	protein_coding
ENSG00000110911.15	-0.00211035	0.000462654	-4.5614	5.08145e-06	0.000611689	0.998538	SLC11A2	protein_coding
ENSG00000135828.11	0.00334092	0.00073252	4.56085	5.0946e-06	0.000611689	1.00232	RNASEL	protein_coding
ENSG00000257743.8	0.00802704	0.00176115	4.55784	5.16832e-06	0.000615498	1.00558	MGAM2	protein_coding
ENSG00000108946.14	0.00414489	0.000909702	4.55632	5.20583e-06	0.000617425	1.00288	PRKAR1A	protein_coding
ENSG00000285409.1	-0.00370298	0.000813345	-4.55278	5.29418e-06	0.00062534	0.997437	AC099671.1	lincRNA
ENSG00000266698.1	0.0100414	0.00220612	4.55162	5.32337e-06	0.000626232	1.00698	MIR3945	miRNA
ENSG00000284948.1	0.00557846	0.00122666	4.54767	5.42423e-06	0.000635513	1.00387	AC107959.4	lincRNA
ENSG00000280832.1	0.00512829	0.00112835	4.54495	5.49471e-06	0.000641175	1.00356	GSEC	antisense
ENSG00000170871.11	0.00388965	0.000856701	4.54026	5.61847e-06	0.000648402	1.0027	KIAA0232	protein_coding
ENSG00000079739.16	0.00289238	0.000637315	4.53838	5.66867e-06	0.000648402	1.00201	PGM1	protein_coding
ENSG00000173559.12	0.00453948	0.00100008	4.53913	5.64859e-06	0.000648402	1.00315	NABP1	protein_coding
ENSG00000186115.12	0.00710656	0.00156533	4.53997	5.62633e-06	0.000648402	1.00494	CYP4F2	protein_coding
ENSG00000213373.7	0.00522325	0.00115006	4.54171	5.5799e-06	0.000648402	1.00363	LINC00671	lincRNA
ENSG00000145982.12	-0.00262624	0.000579125	-4.53485	5.76454e-06	0.000655239	0.998181	FARS2	protein_coding
ENSG00000137312.14	0.00463735	0.00102268	4.53451	5.77373e-06	0.000655239	1.00322	FLOT1	protein_coding
ENSG00000157734.13	-0.00499094	0.00110103	-4.53297	5.81591e-06	0.000657447	0.996547	SNX22	protein_coding
ENSG00000113719.15	0.00456564	0.00100826	4.52826	5.94717e-06	0.000664653	1.00317	ERGIC1	protein_coding
ENSG00000243664.1	0.00833825	0.00184173	4.5274	5.97152e-06	0.000664653	1.0058	RPS29P12	processed_pseudogene
ENSG00000255156.1	-0.00455524	0.00100608	-4.52772	5.96231e-06	0.000664653	0.996848	RNY1P9	misc_RNA
ENSG00000243660.9	0.00349423	0.000771705	4.52794	5.95623e-06	0.000664653	1.00242	ZNF487	protein_coding
ENSG00000163083.5	0.00934791	0.0020652	4.52639	5.99987e-06	0.00066525	1.0065	INHBB	protein_coding
ENSG00000163464.7	0.00592765	0.00131067	4.5226	6.10838e-06	0.000674696	1.00412	CXCR1	protein_coding
ENSG00000119723.16	-0.00199417	0.000441124	-4.52065	6.16495e-06	0.000678355	0.998619	COQ6	protein_coding
ENSG00000277423.1	-0.00568651	0.00125857	-4.51824	6.23562e-06	0.000678394	0.996066	AC069234.5	lincRNA
ENSG00000249138.1	0.00730278	0.00161625	4.51835	6.23237e-06	0.000678394	1.00507	SLED1	transcribed_processed_pseudogene
ENSG00000175787.16	-0.00181976	0.000402704	-4.51884	6.21781e-06	0.000678394	0.998739	ZNF169	protein_coding
ENSG00000165115.14	0.00500984	0.00110932	4.51614	6.29783e-06	0.000682596	1.00348	KIF27	protein_coding
ENSG00000198814.12	0.00550108	0.00121909	4.51245	6.40836e-06	0.000686857	1.00382	GK	protein_coding
ENSG00000203644.3	0.00512587	0.0011359	4.51261	6.40352e-06	0.000686857	1.00356	AC083799.1	sense_intronic
ENSG00000133028.11	-0.00153175	0.000339391	-4.51323	6.38466e-06	0.000686857	0.998939	SCO1	protein_coding
ENSG00000164823.10	0.00581628	0.0012894	4.51084	6.45701e-06	0.000689518	1.00404	OSGIN2	protein_coding
ENSG00000231933.7	0.00782858	0.00173665	4.50787	6.54803e-06	0.000694115	1.00544	Z98949.1	antisense
ENSG00000118564.14	0.00547658	0.00121476	4.50835	6.53324e-06	0.000694115	1.0038	FBXL5	protein_coding
ENSG00000164938.13	0.00428792	0.000952316	4.50262	6.71212e-06	0.000708913	1.00298	TP53INP1	protein_coding
ENSG00000196083.9	0.00492248	0.00109415	4.4989	6.83072e-06	0.000718815	1.00342	IL1RAP	protein_coding
ENSG00000181274.6	0.00527133	0.00117264	4.49527	6.94819e-06	0.000728527	1.00366	FRAT2	protein_coding
ENSG00000236806.1	-0.005089	0.0011329	-4.492	7.05582e-06	0.000737142	0.996479	RPL7AP15	processed_pseudogene
ENSG00000185862.6	0.00534494	0.00119033	4.49031	7.11196e-06	0.000740334	1.00371	EVI2B	protein_coding
ENSG00000236559.1	-0.00605015	0.00134862	-4.48617	7.25138e-06	0.000752142	0.995815	AL117381.1	antisense
ENSG00000183019.7	0.00795917	0.0017761	4.48127	7.41991e-06	0.000766874	1.00553	MCEMP1	protein_coding
ENSG00000254328.1	0.00337418	0.000753251	4.47948	7.48235e-06	0.000767843	1.00234	AC008429.4	processed_pseudogene
ENSG00000168495.12	-0.00254176	0.000567354	-4.48002	7.46361e-06	0.000767843	0.99824	POLR3D	protein_coding
ENSG00000172795.15	0.00451533	0.00100834	4.47797	7.53573e-06	0.000770588	1.00313	DCP2	protein_coding
ENSG00000273812.1	0.00709848	0.00158585	4.47612	7.60106e-06	0.000773605	1.00493	BX640514.2	lincRNA
ENSG00000206344.7	0.00495663	0.00110747	4.47563	7.61869e-06	0.000773605	1.00344	HCG27	lincRNA
ENSG00000169967.16	0.00430512	0.000962199	4.47426	7.66775e-06	0.000775864	1.00299	MAP3K2	protein_coding
ENSG00000189067.12	0.00508946	0.00113779	4.47311	7.70904e-06	0.000777323	1.00353	LITAF	protein_coding
ENSG00000280587.1	0.00491434	0.00109896	4.4718	7.75623e-06	0.000779367	1.00341	LINC01348	lincRNA
ENSG00000008294.20	0.00354995	0.000794397	4.46873	7.86847e-06	0.000786085	1.00246	SPAG9	protein_coding
ENSG00000140575.12	0.00407598	0.000912161	4.46849	7.87742e-06	0.000786085	1.00283	IQGAP1	protein_coding
ENSG00000125170.10	0.0071464	0.00160014	4.46611	7.96554e-06	0.000792147	1.00497	DOK4	protein_coding
ENSG00000211938.2	-0.00970345	0.00217348	-4.46448	8.0262e-06	0.000795446	0.993297	IGHV3-7	IG_V_gene
ENSG00000165175.15	0.0042791	0.000959259	4.46083	8.16413e-06	0.000804916	1.00297	MID1IP1	protein_coding
ENSG00000240616.1	-0.00419249	0.000939917	-4.46049	8.17739e-06	0.000804916	0.997098	RPS6P25	processed_pseudogene
ENSG00000170836.11	0.00200941	0.000450684	4.45859	8.25015e-06	0.000809325	1.00139	PPM1D	protein_coding
ENSG00000075426.11	0.00522589	0.00117452	4.44937	8.61218e-06	0.000841986	1.00363	FOSL2	protein_coding
ENSG00000013364.18	0.00383008	0.000862136	4.44255	8.88977e-06	0.000866199	1.00266	MVP	protein_coding
ENSG00000116954.7	0.00243273	0.000547734	4.44145	8.93562e-06	0.000867745	1.00169	RRAGC	protein_coding
ENSG00000137575.11	0.00495719	0.00111717	4.43727	9.11051e-06	0.00087901	1.00344	SDCBP	protein_coding
ENSG00000272810.1	0.00460632	0.00103811	4.43723	9.11238e-06	0.00087901	1.0032	U91328.3	lincRNA
ENSG00000124588.19	0.00486015	0.00109588	4.43493	9.21042e-06	0.000885516	1.00337	NQO2	protein_coding
ENSG00000140044.12	0.00423261	0.00095553	4.42959	9.44118e-06	0.000904696	1.00294	JDP2	protein_coding
ENSG00000166949.15	-0.004145	0.000936311	-4.42694	9.55776e-06	0.000906859	0.997131	SMAD3	protein_coding
ENSG00000267419.2	-0.00170099	0.000384165	-4.42777	9.52143e-06	0.000906859	0.998822	AC011477.1	transcribed_unprocessed_pseudogene
ENSG00000142207.6	-0.00251931	0.000569028	-4.42739	9.53795e-06	0.000906859	0.998255	URB1	protein_coding
ENSG00000173597.8	0.00470964	0.00106467	4.42357	9.70829e-06	0.000918131	1.00327	SULT1B1	protein_coding
ENSG00000111490.13	0.00465048	0.00105194	4.42087	9.83047e-06	0.000926658	1.00323	TBC1D30	protein_coding
ENSG00000252568.1	0.00443469	0.00100414	4.41642	1.0035e-05	0.000942864	1.00308	RNU7-28P	snRNA
ENSG00000187257.15	0.00343774	0.000779433	4.41057	1.031e-05	0.000965573	1.00239	RSBN1L	protein_coding
ENSG00000136040.8	0.00448869	0.00101797	4.40946	1.03631e-05	0.000967411	1.00312	PLXNC1	protein_coding
ENSG00000113916.17	0.0062103	0.00140909	4.40732	1.0466e-05	0.000969608	1.00431	BCL6	protein_coding
ENSG00000226853.2	0.00617207	0.00140015	4.40814	1.0426e-05	0.000969608	1.00429	AC010894.2	lincRNA
ENSG00000209042.1	0.00601835	0.00136567	4.40688	1.04871e-05	0.000969608	1.00418	SNORD12C	snoRNA
ENSG00000197329.11	0.00454629	0.00103219	4.40453	1.06015e-05	0.000977061	1.00316	PELI1	protein_coding
ENSG00000152213.3	0.0039584	0.00089977	4.39935	1.08578e-05	0.000993235	1.00275	ARL11	protein_coding
ENSG00000284882.1	0.00460147	0.00104605	4.3989	1.088e-05	0.000993235	1.00319	AL359762.1	bidirectional_promoter_lncRNA
ENSG00000174130.12	0.00453465	0.00103066	4.39973	1.08383e-05	0.000993235	1.00315	TLR6	protein_coding
ENSG00000133800.8	0.00671138	0.00152634	4.39704	1.09735e-05	0.000998621	1.00466	LYVE1	protein_coding
ENSG00000166527.7	0.00785955	0.00178871	4.39398	1.11295e-05	0.00100964	1.00546	CLEC4D	protein_coding
ENSG00000116741.7	0.0064768	0.00147572	4.3889	1.13923e-05	0.00103026	1.0045	RGS2	protein_coding
ENSG00000102218.5	0.00484516	0.00110518	4.38404	1.16496e-05	0.00105024	1.00336	RP2	protein_coding
ENSG00000217128.11	0.00387115	0.000883448	4.38187	1.17666e-05	0.00105749	1.00269	FNIP1	protein_coding
ENSG00000224152.1	0.00576011	0.00131501	4.38027	1.18533e-05	0.00106199	1.004	AC009506.1	antisense
ENSG00000270437.1	0.00894799	0.00204523	4.37504	1.21408e-05	0.00108335	1.00622	AC009501.2	processed_pseudogene
ENSG00000146592.16	0.00578317	0.00132199	4.37458	1.21666e-05	0.00108335	1.00402	CREB5	protein_coding
ENSG00000101846.6	0.00367762	0.000840863	4.37362	1.22203e-05	0.00108479	1.00255	STS	protein_coding
ENSG00000258082.1	0.00513695	0.00117503	4.37178	1.23238e-05	0.00109064	1.00357	AL391832.3	lincRNA
ENSG00000154122.13	-0.00484389	0.00110884	-4.36841	1.25155e-05	0.00110423	0.996648	ANKH	protein_coding
ENSG00000120129.5	0.00587146	0.00134435	4.3675	1.25674e-05	0.00110543	1.00408	DUSP1	protein_coding
ENSG00000133318.13	0.00443451	0.00101578	4.36563	1.26755e-05	0.00111157	1.00308	RTN3	protein_coding
ENSG00000159339.13	0.00684567	0.00156922	4.36247	1.28603e-05	0.00112436	1.00476	PADI4	protein_coding
ENSG00000260078.3	0.00600892	0.00137997	4.35439	1.33438e-05	0.00115969	1.00417	AC007342.3	transcribed_unprocessed_pseudogene
ENSG00000062282.14	0.00540414	0.00124108	4.35438	1.33445e-05	0.00115969	1.00375	DGAT2	protein_coding
ENSG00000100116.16	-0.0103775	0.00238486	-4.3514	1.35273e-05	0.00116483	0.992833	GCAT	protein_coding
ENSG00000100644.16	0.00403603	0.000927545	4.3513	1.35332e-05	0.00116483	1.0028	HIF1A	protein_coding
ENSG00000165046.12	0.00361665	0.000831262	4.35079	1.35646e-05	0.00116483	1.00251	LETM2	protein_coding
ENSG00000073756.11	0.00582541	0.00133875	4.35138	1.35283e-05	0.00116483	1.00405	PTGS2	protein_coding
ENSG00000178726.6	0.00684856	0.00157528	4.34753	1.37679e-05	0.00117879	1.00476	THBD	protein_coding
ENSG00000170892.10	0.00435916	0.00100391	4.34216	1.41087e-05	0.0012017	1.00303	TSEN34	protein_coding
ENSG00000198604.10	0.00449785	0.00103589	4.34201	1.41186e-05	0.0012017	1.00312	BAZ1A	protein_coding
ENSG00000158470.5	0.00518036	0.0011938	4.33941	1.42868e-05	0.00120891	1.0036	B4GALT5	protein_coding
ENSG00000163625.15	0.00533496	0.00122931	4.33981	1.42606e-05	0.00120891	1.0037	WDFY3	protein_coding
ENSG00000247624.6	0.00317199	0.000731392	4.33692	1.44496e-05	0.00121848	1.0022	CPEB2-DT	lincRNA
ENSG00000117151.12	0.00457041	0.00105397	4.33639	1.44841e-05	0.00121848	1.00317	CTBS	protein_coding
ENSG00000100612.13	0.00360525	0.000831992	4.33328	1.46907e-05	0.00123228	1.0025	DHRS7	protein_coding
ENSG00000090316.15	0.00332201	0.000767071	4.33077	1.4859e-05	0.00124279	1.00231	MAEA	protein_coding
ENSG00000173535.14	0.00538438	0.00124357	4.32977	1.49267e-05	0.00124485	1.00374	TNFRSF10C	protein_coding
ENSG00000171236.9	0.00577898	0.00133496	4.32895	1.49824e-05	0.00124524	1.00401	LRG1	protein_coding
ENSG00000135365.15	0.00363541	0.000840013	4.3278	1.50604e-05	0.00124524	1.00252	PHF21A	protein_coding
ENSG00000175928.5	0.0065482	0.00151298	4.328	1.50466e-05	0.00124524	1.00455	LRRN1	protein_coding
ENSG00000243554.1	-0.00307499	0.000710808	-4.32605	1.5181e-05	0.00125164	0.997871	AC004967.1	transcribed_unprocessed_pseudogene
ENSG00000231344.1	-0.00469419	0.00108542	-4.32476	1.52699e-05	0.00125539	0.996752	AL020997.1	processed_pseudogene
ENSG00000086300.15	0.00478756	0.0011075	4.32286	1.54022e-05	0.00126268	1.00332	SNX10	protein_coding
ENSG00000136999.4	0.00697376	0.00161428	4.32003	1.56008e-05	0.00127535	1.00485	NOV	protein_coding
ENSG00000144228.8	0.00506129	0.00117188	4.31896	1.56768e-05	0.00127795	1.00351	SPOPL	protein_coding
ENSG00000270276.2	0.00455401	0.00105487	4.31712	1.58076e-05	0.00128499	1.00316	HIST2H4B	protein_coding
ENSG00000203710.11	0.0054893	0.00127299	4.31214	1.61681e-05	0.00131062	1.00381	CR1	protein_coding
ENSG00000153207.15	0.00363709	0.000844047	4.30912	1.63908e-05	0.00131854	1.00252	AHCTF1	protein_coding
ENSG00000119669.4	0.0046119	0.00107031	4.30896	1.64026e-05	0.00131854	1.0032	IRF2BPL	protein_coding
ENSG00000251513.2	-0.00827765	0.00192085	-4.30937	1.63723e-05	0.00131854	0.994279	LIX1-AS1	lincRNA
ENSG00000134779.14	-0.00300312	0.00069733	-4.3066	1.65785e-05	0.00132899	0.997921	TPGS2	protein_coding
ENSG00000164674.15	0.0042466	0.000987119	4.30202	1.69248e-05	0.00135171	1.00295	SYTL3	protein_coding
ENSG00000168214.20	0.00336845	0.000783066	4.30162	1.69553e-05	0.00135171	1.00234	RBPJ	protein_coding
ENSG00000237576.1	0.00457397	0.00106439	4.29728	1.72903e-05	0.00137463	1.00318	LINC01888	antisense
ENSG00000117335.19	0.00415087	0.000966121	4.29643	1.7357e-05	0.00137614	1.00288	CD46	protein_coding
ENSG00000223969.5	0.00585749	0.00136374	4.29515	1.74576e-05	0.00138034	1.00407	AC002456.1	antisense
ENSG00000277590.1	0.00617009	0.00143781	4.29132	1.77611e-05	0.00139578	1.00429	MIR7845	miRNA
ENSG00000114737.15	-0.00536552	0.00125019	-4.29175	1.77269e-05	0.00139578	0.996288	CISH	protein_coding
ENSG00000115507.9	0.00959812	0.00223687	4.29087	1.77975e-05	0.00139578	1.00668	OTX1	protein_coding
ENSG00000244242.1	0.00608554	0.00141912	4.28825	1.80088e-05	0.00140853	1.00423	IFITM10	protein_coding
ENSG00000276002.1	0.0114181	0.00266526	4.28404	1.83533e-05	0.00142147	1.00795	RF00017	misc_RNA
ENSG00000166446.14	-0.00277018	0.000646661	-4.28383	1.83707e-05	0.00142147	0.998082	CDYL2	protein_coding
ENSG00000222078.1	-0.00636618	0.00148584	-4.28458	1.83086e-05	0.00142147	0.995597	RN7SKP110	misc_RNA
ENSG00000067082.14	0.00323156	0.000754223	4.28462	1.83049e-05	0.00142147	1.00224	KLF6	protein_coding
ENSG00000262001.1	0.00323194	0.000754886	4.28136	1.85751e-05	0.00143345	1.00224	DLGAP1-AS2	antisense
ENSG00000184005.10	0.00438291	0.00102451	4.27807	1.88522e-05	0.00145097	1.00304	ST6GALNAC3	protein_coding
ENSG00000065615.13	0.00322258	0.000753393	4.27742	1.89071e-05	0.00145133	1.00224	CYB5R4	protein_coding
ENSG00000243953.1	0.0084276	0.00197057	4.27673	1.89656e-05	0.00145197	1.00586	AC073359.1	lincRNA
ENSG00000242707.3	-0.0035918	0.000839984	-4.27604	1.90247e-05	0.00145265	0.997513	RN7SL362P	misc_RNA
ENSG00000198189.10	0.00445435	0.00104216	4.27416	1.9186e-05	0.00146111	1.00309	HSD17B11	protein_coding
ENSG00000135823.13	0.00251614	0.000588893	4.27266	1.93153e-05	0.0014671	1.00175	STX6	protein_coding
ENSG00000266501.1	-0.00339643	0.000795678	-4.26859	1.96709e-05	0.00148906	0.997649	AC025198.1	processed_pseudogene
ENSG00000261428.2	-0.00316348	0.000741179	-4.26818	1.97073e-05	0.00148906	0.99781	AC097461.1	antisense
ENSG00000123505.15	0.00352408	0.000825923	4.26684	1.98264e-05	0.00149416	1.00245	AMD1	protein_coding
ENSG00000164144.15	0.00432285	0.00101347	4.26539	1.99553e-05	0.00149608	1.003	ARFIP1	protein_coding
ENSG00000246016.2	0.00508294	0.00119153	4.2659	1.99099e-05	0.00149608	1.00353	LINC01513	antisense
ENSG00000100731.15	0.00322827	0.000757455	4.26199	2.02614e-05	0.00151179	1.00224	PCNX1	protein_coding
ENSG00000224672.4	0.00377911	0.000886958	4.26075	2.03738e-05	0.00151179	1.00262	RPL17P10	processed_pseudogene
ENSG00000163041.9	0.00445131	0.00104466	4.261	2.03512e-05	0.00151179	1.00309	H3F3A	protein_coding
ENSG00000272853.1	-0.002409	0.000565298	-4.26146	2.03093e-05	0.00151179	0.998332	AC069544.1	lincRNA
ENSG00000108379.9	0.0107681	0.00252825	4.2591	2.05255e-05	0.00151527	1.00749	WNT3	protein_coding
ENSG00000243646.9	0.00324839	0.000762612	4.25956	2.0483e-05	0.00151527	1.00225	IL10RB	protein_coding
ENSG00000156671.13	0.00357215	0.000839808	4.25353	2.10429e-05	0.00154952	1.00248	SAMD8	protein_coding
ENSG00000102445.18	0.00559906	0.00131706	4.25118	2.12643e-05	0.00156185	1.00389	RUBCNL	protein_coding
ENSG00000182885.16	0.00707628	0.00166509	4.24979	2.13968e-05	0.00156368	1.00492	ADGRG3	protein_coding
ENSG00000166428.13	-0.00550704	0.00129584	-4.24979	2.13973e-05	0.00156368	0.99619	PLD4	protein_coding
ENSG00000171051.8	0.00544512	0.00128175	4.24817	2.15521e-05	0.00157103	1.00378	FPR1	protein_coding
ENSG00000233431.1	0.00645665	0.00152023	4.24716	2.16499e-05	0.00157419	1.00449	LINC02596	antisense
ENSG00000274213.1	0.00654339	0.0015415	4.24481	2.18784e-05	0.00158681	1.00455	AC015912.3	lincRNA
ENSG00000093000.18	0.00309786	0.000730159	4.24272	2.20828e-05	0.00159763	1.00215	NUP50	protein_coding
ENSG00000100368.13	0.00491197	0.00115872	4.23912	2.24393e-05	0.00161134	1.00341	CSF2RB	protein_coding
ENSG00000189180.15	0.00346865	0.000818089	4.23994	2.23575e-05	0.00161134	1.00241	ZNF33A	protein_coding
ENSG00000228079.2	0.00670122	0.00158067	4.23947	2.24044e-05	0.00161134	1.00466	AC012368.2	lincRNA
ENSG00000205423.11	0.00367857	0.000868795	4.23411	2.29464e-05	0.00163632	1.00255	CNEP1R1	protein_coding
ENSG00000159496.14	0.00504007	0.00119095	4.23197	2.31653e-05	0.00163632	1.0035	RGL4	protein_coding
ENSG00000204323.5	-0.00786014	0.00185727	-4.23209	2.3153e-05	0.00163632	0.994567	SMIM5	protein_coding
ENSG00000073921.17	0.00388739	0.000918304	4.23323	2.30363e-05	0.00163632	1.0027	PICALM	protein_coding
ENSG00000198700.9	-0.00201186	0.000475415	-4.2318	2.31829e-05	0.00163632	0.998606	IPO9	protein_coding
ENSG00000143486.15	-0.00224957	0.000531309	-4.23401	2.29556e-05	0.00163632	0.998442	EIF2D	protein_coding
ENSG00000257243.1	-0.00364358	0.000860805	-4.23276	2.30836e-05	0.00163632	0.997478	AC020612.1	processed_pseudogene
ENSG00000086730.16	0.00397722	0.000940491	4.22887	2.34864e-05	0.00165371	1.00276	LAT2	protein_coding
ENSG00000163803.12	0.00755129	0.00178635	4.22722	2.36596e-05	0.00165871	1.00525	PLB1	protein_coding
ENSG00000188906.15	0.00512891	0.00121334	4.2271	2.36721e-05	0.00165871	1.00356	LRRK2	protein_coding
ENSG00000057657.16	0.00345182	0.000816736	4.22635	2.37509e-05	0.00166021	1.0024	PRDM1	protein_coding
ENSG00000078618.21	0.00305352	0.00072268	4.22527	2.38651e-05	0.00166418	1.00212	NRDC	protein_coding
ENSG00000199331.1	-0.00319113	0.000755661	-4.22296	2.41111e-05	0.00167729	0.997791	RF00019	misc_RNA
ENSG00000101916.11	0.00463945	0.00109926	4.22054	2.43719e-05	0.00169136	1.00322	TLR8	protein_coding
ENSG00000260916.7	0.00476113	0.0011286	4.21861	2.45818e-05	0.00170185	1.00331	CCPG1	protein_coding
ENSG00000235749.2	0.00432239	0.00102478	4.21787	2.46624e-05	0.00170335	1.003	AL390860.1	antisense
ENSG00000248508.6	-0.00302071	0.000716319	-4.21699	2.47582e-05	0.0017059	0.997908	SRP14-AS1	lincRNA
ENSG00000108424.9	0.00334669	0.000794369	4.21302	2.51976e-05	0.00173205	1.00232	KPNB1	protein_coding
ENSG00000123636.17	0.0038339	0.000910448	4.21101	2.54237e-05	0.00173946	1.00266	BAZ2B	protein_coding
ENSG00000186529.15	0.00598271	0.00142074	4.21099	2.54256e-05	0.00173946	1.00416	CYP4F3	protein_coding
ENSG00000220323.4	0.0036624	0.000869962	4.20983	2.55559e-05	0.00174015	1.00254	HIST2H2BD	transcribed_unprocessed_pseudogene
ENSG00000058799.14	0.00296629	0.000704584	4.20999	2.55377e-05	0.00174015	1.00206	YIPF1	protein_coding
ENSG00000100503.23	0.00297953	0.000708276	4.20674	2.59084e-05	0.00176001	1.00207	NIN	protein_coding
ENSG00000247853.2	0.0042954	0.00102175	4.20397	2.62277e-05	0.00177753	1.00298	AC006064.2	antisense
ENSG00000173334.3	0.00408696	0.000972957	4.20056	2.66261e-05	0.00180031	1.00284	TRIB1	protein_coding
ENSG00000153310.19	0.00343434	0.000818093	4.19798	2.69301e-05	0.00181662	1.00238	FAM49B	protein_coding
ENSG00000138814.16	0.00334971	0.000798382	4.19562	2.72125e-05	0.0018314	1.00232	PPP3CA	protein_coding
ENSG00000012232.8	0.00419501	0.0010002	4.19418	2.73859e-05	0.00183879	1.00291	EXTL3	protein_coding
ENSG00000158887.15	0.00395533	0.000944021	4.18988	2.79104e-05	0.00186967	1.00275	MPZ	protein_coding
ENSG00000163191.5	0.00506747	0.00121037	4.1867	2.83035e-05	0.00189163	1.00352	S100A11	protein_coding
ENSG00000180509.11	0.00470565	0.0011254	4.18131	2.8983e-05	0.00193258	1.00327	KCNE1	protein_coding
ENSG00000253736.2	0.00619402	0.00148218	4.17899	2.92813e-05	0.00194798	1.0043	AC022217.3	antisense
ENSG00000106263.17	-0.00354246	0.000847887	-4.17799	2.94097e-05	0.00195204	0.997548	EIF3B	protein_coding
ENSG00000162747.10	0.00627064	0.00150162	4.1759	2.96809e-05	0.00196553	1.00436	FCGR3B	protein_coding
ENSG00000251179.1	0.00801819	0.00192056	4.17492	2.98091e-05	0.00196951	1.00557	TMEM92-AS1	antisense
ENSG00000285667.1	0.00279126	0.000668697	4.17417	2.99073e-05	0.0019715	1.00194	AC012291.2	lincRNA
ENSG00000136156.13	0.00398194	0.000954226	4.17296	3.00672e-05	0.00197753	1.00276	ITM2B	protein_coding
ENSG00000116017.10	0.00407655	0.000977208	4.17163	3.02426e-05	0.00198007	1.00283	ARID3A	protein_coding
ENSG00000155926.13	0.00363281	0.000870811	4.17176	3.02257e-05	0.00198007	1.00252	SLA	protein_coding
ENSG00000099985.3	0.00635214	0.0015242	4.16752	3.07926e-05	0.00199893	1.00441	OSM	protein_coding
ENSG00000266850.1	0.00407757	0.00097844	4.16742	3.08069e-05	0.00199893	1.00283	AC090912.2	antisense
ENSG00000108439.10	-0.00222288	0.000533308	-4.1681	3.07153e-05	0.00199893	0.99846	PNPO	protein_coding
ENSG00000137460.8	0.00509567	0.0012225	4.16823	3.06978e-05	0.00199893	1.00354	FHDC1	protein_coding
ENSG00000259182.5	0.00758746	0.00182127	4.16601	3.09972e-05	0.00200677	1.00527	AC019254.1	lincRNA
ENSG00000259332.3	0.00383777	0.000921406	4.16513	3.11175e-05	0.00201007	1.00266	ST20-MTHFS	protein_coding
ENSG00000085465.12	-0.00452826	0.00108762	-4.16344	3.1349e-05	0.00202051	0.996866	OVGP1	protein_coding
ENSG00000136404.15	0.00413622	0.000994162	4.16051	3.17533e-05	0.00203933	1.00287	TM6SF1	protein_coding
ENSG00000124731.12	0.00543297	0.00130591	4.16031	3.17819e-05	0.00203933	1.00377	TREM1	protein_coding
ENSG00000115204.14	-0.00200423	0.000482008	-4.15808	3.20933e-05	0.00205475	0.998612	MPV17	protein_coding
ENSG00000250017.1	0.00410449	0.00098742	4.15678	3.22766e-05	0.00206192	1.00285	AC117529.1	processed_pseudogene
ENSG00000196741.5	-0.00192989	0.000464514	-4.15464	3.25803e-05	0.00207674	0.998663	LINC01560	lincRNA
ENSG00000142046.14	0.00409047	0.000984802	4.15359	3.27299e-05	0.0020817	1.00284	TMEM91	protein_coding
ENSG00000139890.9	0.00504652	0.00121627	4.14918	3.33675e-05	0.00211759	1.0035	REM2	protein_coding
ENSG00000268240.1	0.00631309	0.0015224	4.1468	3.37151e-05	0.00212381	1.00439	AC123912.2	lincRNA
ENSG00000173110.7	0.00499023	0.00120374	4.14561	3.38907e-05	0.00212381	1.00346	HSPA6	protein_coding
ENSG00000233184.6	-0.00379673	0.000915598	-4.14672	3.37269e-05	0.00212381	0.997372	AC093157.1	antisense
ENSG00000248323.6	0.00458141	0.00110494	4.14632	3.37863e-05	0.00212381	1.00318	LUCAT1	antisense
ENSG00000120162.9	-0.00332873	0.000802916	-4.1458	3.38631e-05	0.00212381	0.997695	MOB3B	protein_coding
ENSG00000156398.12	-0.002397	0.000578216	-4.14551	3.39057e-05	0.00212381	0.99834	SFXN2	protein_coding
ENSG00000101546.12	-0.0022012	0.000531154	-4.14419	3.4102e-05	0.00212484	0.998475	RBFA	protein_coding
ENSG00000135127.11	-0.00352358	0.000850258	-4.14414	3.41098e-05	0.00212484	0.997561	BICDL1	protein_coding
ENSG00000113269.13	0.00358568	0.000865391	4.14342	3.4216e-05	0.00212484	1.00249	RNF130	protein_coding
ENSG00000048392.11	0.00514749	0.00124231	4.14348	3.42078e-05	0.00212484	1.00357	RRM2B	protein_coding
ENSG00000165650.11	0.0044939	0.00108482	4.14252	3.43503e-05	0.00212861	1.00312	PDZD8	protein_coding
ENSG00000277443.2	0.00545909	0.00131824	4.1412	3.45494e-05	0.00213638	1.00379	MARCKS	protein_coding
ENSG00000182504.10	0.00271477	0.000656071	4.13792	3.50471e-05	0.0021469	1.00188	CEP97	protein_coding
ENSG00000097033.14	0.00372369	0.000899995	4.13746	3.51171e-05	0.0021469	1.00258	SH3GLB1	protein_coding
ENSG00000140543.14	-0.00243841	0.000589395	-4.13715	3.51647e-05	0.0021469	0.998311	DET1	protein_coding
ENSG00000049249.8	0.00370406	0.000894806	4.13951	3.48053e-05	0.0021469	1.00257	TNFRSF9	protein_coding
ENSG00000072694.20	0.00443352	0.00107115	4.13902	3.48791e-05	0.0021469	1.00308	FCGR2B	protein_coding
ENSG00000168575.9	-0.00214101	0.00051738	-4.13817	3.50086e-05	0.0021469	0.998517	SLC20A2	protein_coding
ENSG00000196227.10	0.00261138	0.000631373	4.13603	3.53369e-05	0.00215287	1.00181	FAM217B	protein_coding
ENSG00000276651.1	0.00195421	0.00047269	4.13422	3.56159e-05	0.00216531	1.00136	AC007950.2	lincRNA
ENSG00000012660.13	0.00305795	0.000740371	4.13029	3.62306e-05	0.00219611	1.00212	ELOVL5	protein_coding
ENSG00000151151.5	0.00581377	0.00140769	4.13001	3.62742e-05	0.00219611	1.00404	IPMK	protein_coding
ENSG00000115652.14	-0.00262183	0.000635116	-4.12812	3.65744e-05	0.00220966	0.998184	UXS1	protein_coding
ENSG00000236180.2	0.00464888	0.00112689	4.12543	3.70051e-05	0.00223102	1.00323	AL445669.2	processed_pseudogene
ENSG00000280169.1	0.00537395	0.00130348	4.12278	3.7433e-05	0.00225213	1.00373	AL136526.1	antisense
ENSG00000082996.19	0.00423408	0.00102835	4.11737	3.83223e-05	0.00230085	1.00294	RNF13	protein_coding
ENSG00000273129.1	0.00648768	0.00157716	4.11351	3.89683e-05	0.00233479	1.00451	PACERR	lincRNA
ENSG00000125246.15	-0.00316981	0.000770725	-4.11277	3.90947e-05	0.00233752	0.997805	CLYBL	protein_coding
ENSG00000238160.1	0.00497445	0.0012106	4.10908	3.97241e-05	0.00237026	1.00345	AC116366.2	antisense
ENSG00000254788.7	0.00420342	0.00102342	4.10725	4.00398e-05	0.00237945	1.00292	CKLF-CMTM1	protein_coding
ENSG00000187553.8	0.00489239	0.00119116	4.10723	4.00426e-05	0.00237945	1.0034	CYP26C1	protein_coding
ENSG00000183690.12	0.00457206	0.00111346	4.10617	4.02278e-05	0.00238556	1.00317	EFHC2	protein_coding
ENSG00000235119.1	0.00258175	0.000628884	4.10529	4.03806e-05	0.00238972	1.00179	AL138895.1	lincRNA
ENSG00000234436.1	0.00736511	0.00179449	4.1043	4.05544e-05	0.00239459	1.00512	AC245884.2	unprocessed_pseudogene
ENSG00000228242.6	0.00508231	0.00123842	4.10388	4.06284e-05	0.00239459	1.00353	AC093495.1	antisense
ENSG00000249667.1	-0.0045614	0.00111205	-4.1018	4.09944e-05	0.00241125	0.996843	LINC01259	lincRNA
ENSG00000271749.1	0.00440858	0.00107502	4.10095	4.11465e-05	0.00241529	1.00306	AC005828.6	unprocessed_pseudogene
ENSG00000285693.1	0.00409214	0.000998708	4.09743	4.17757e-05	0.00244232	1.00284	AP002381.2	lincRNA
ENSG00000031081.10	-0.00317581	0.000774995	-4.09785	4.17012e-05	0.00244232	0.997801	ARHGAP31	protein_coding
ENSG00000110422.11	0.00380348	0.000928566	4.09608	4.20206e-05	0.00245168	1.00264	HIPK3	protein_coding
ENSG00000102900.12	-0.00197417	0.00048207	-4.09518	4.21833e-05	0.00245623	0.998633	NUP93	protein_coding
ENSG00000137414.5	0.0050705	0.00123833	4.09464	4.22825e-05	0.00245706	1.00352	FAM8A1	protein_coding
ENSG00000106829.18	0.00270446	0.000660679	4.09346	4.24983e-05	0.00246465	1.00188	TLE4	protein_coding
ENSG00000151893.14	0.00292848	0.000715573	4.0925	4.26745e-05	0.00246991	1.00203	CACUL1	protein_coding
ENSG00000179456.10	0.00319987	0.000782235	4.09068	4.30115e-05	0.00248445	1.00222	ZBTB18	protein_coding
ENSG00000285938.1	0.00840416	0.00205529	4.08903	4.3318e-05	0.00249221	1.00584	AC072022.2	antisense
ENSG00000049883.14	-0.00211798	0.000517931	-4.08931	4.32658e-05	0.00249221	0.998533	PTCD2	protein_coding
ENSG00000137266.14	-0.00569295	0.00139356	-4.0852	4.40397e-05	0.0025287	0.996062	SLC22A23	protein_coding
ENSG00000132155.11	0.00351809	0.000861311	4.08457	4.41582e-05	0.00253048	1.00244	RAF1	protein_coding
ENSG00000132275.10	-0.00194148	0.000475486	-4.08315	4.44285e-05	0.00254094	0.998655	RRP8	protein_coding
ENSG00000167676.4	0.00679007	0.00166337	4.08211	4.46277e-05	0.0025473	1.00472	PLIN4	protein_coding
ENSG00000278987.1	-0.00162601	0.000398578	-4.07954	4.51247e-05	0.00256051	0.998874	AL031009.1	TEC
ENSG00000246560.2	0.00306182	0.000750448	4.07999	4.50376e-05	0.00256051	1.00212	AC018797.2	antisense
ENSG00000204344.14	0.00220037	0.000539365	4.07956	4.51213e-05	0.00256051	1.00153	STK19	protein_coding
ENSG00000250548.6	0.00524984	0.00128737	4.07795	4.54343e-05	0.00256801	1.00365	LINC01303	lincRNA
ENSG00000116701.14	0.00411456	0.00100887	4.07838	4.53507e-05	0.00256801	1.00286	NCF2	protein_coding
ENSG00000267365.1	0.00513128	0.00125858	4.07705	4.56109e-05	0.00257297	1.00356	KCNJ2-AS1	antisense
ENSG00000135842.16	0.00518952	0.00127319	4.07601	4.58159e-05	0.00257951	1.0036	FAM129A	protein_coding
ENSG00000206190.11	-0.00371166	0.000911161	-4.07355	4.63013e-05	0.00259673	0.997431	ATP10A	protein_coding
ENSG00000166788.9	-0.00265489	0.000651683	-4.07389	4.62338e-05	0.00259673	0.998161	SAAL1	protein_coding
ENSG00000114331.13	0.00343316	0.000843486	4.0702	4.6972e-05	0.00262925	1.00238	ACAP2	protein_coding
ENSG00000278600.1	0.00385492	0.000947399	4.06895	4.72246e-05	0.00263644	1.00268	AC015871.3	sense_intronic
ENSG00000242616.3	0.00717377	0.00176335	4.06825	4.73666e-05	0.00263644	1.00498	GNG10	protein_coding
ENSG00000189337.16	0.00808871	0.00198827	4.06822	4.73737e-05	0.00263644	1.00562	KAZN	protein_coding
ENSG00000040633.12	0.00273586	0.000672672	4.06715	4.75907e-05	0.00264343	1.0019	PHF23	protein_coding
ENSG00000237803.5	0.00672414	0.00165419	4.06491	4.80501e-05	0.0026593	1.00467	LINC00211	lincRNA
ENSG00000263482.3	-0.00484499	0.00119192	-4.06486	4.80603e-05	0.0026593	0.996647	ANTXRLP1	unprocessed_pseudogene
ENSG00000128383.12	0.00560852	0.00138095	4.06135	4.87888e-05	0.00267913	1.0039	APOBEC3A	protein_coding
ENSG00000204345.1	0.00797297	0.00196308	4.06147	4.87657e-05	0.00267913	1.00554	CD300LD	protein_coding
ENSG00000170876.7	0.0032093	0.000790008	4.06236	4.85788e-05	0.00267913	1.00223	TMEM43	protein_coding
ENSG00000025039.14	0.00400379	0.000985619	4.06221	4.86109e-05	0.00267913	1.00278	RRAGD	protein_coding
ENSG00000154845.15	0.00396012	0.000975225	4.06073	4.89199e-05	0.00268124	1.00275	PPP4R1	protein_coding
ENSG00000081237.19	0.00365754	0.000901181	4.0586	4.9367e-05	0.00270063	1.00254	PTPRC	protein_coding
ENSG00000244361.1	0.00838271	0.00206661	4.05626	4.98648e-05	0.00272271	1.00583	RPL30P7	processed_pseudogene
ENSG00000270640.1	0.00480988	0.00118674	4.05302	5.0561e-05	0.00275553	1.00334	AC104695.3	sense_intronic
ENSG00000228719.1	0.00580999	0.00143368	4.05249	5.06763e-05	0.00275662	1.00404	AL022313.2	lincRNA
ENSG00000274536.6	0.00429027	0.00105894	4.05147	5.08958e-05	0.00276336	1.00298	AL034397.3	antisense
ENSG00000260621.1	0.00488069	0.00120569	4.04806	5.16442e-05	0.00279475	1.00339	AC092140.1	antisense
ENSG00000184677.17	-0.0026175	0.000646622	-4.04796	5.16671e-05	0.00279475	0.998187	ZBTB40	protein_coding
ENSG00000179715.12	-0.00413787	0.0010225	-4.04682	5.19191e-05	0.00280315	0.997136	PCED1B	protein_coding
ENSG00000120063.9	0.00356132	0.000880252	4.0458	5.21446e-05	0.00281008	1.00247	GNA13	protein_coding
ENSG00000255421.1	0.00270296	0.000668501	4.04331	5.27017e-05	0.00283482	1.00188	AP002340.1	antisense
ENSG00000073536.17	-0.00193518	0.000479212	-4.03826	5.38502e-05	0.00289122	0.99866	NLE1	protein_coding
ENSG00000007944.14	0.00347609	0.000860937	4.03757	5.40087e-05	0.00289437	1.00241	MYLIP	protein_coding
ENSG00000103994.17	0.0030707	0.000760859	4.03584	5.44074e-05	0.00291034	1.00213	ZNF106	protein_coding
ENSG00000065135.10	0.00269679	0.000668405	4.03467	5.46799e-05	0.00291952	1.00187	GNAI3	protein_coding
ENSG00000257127.6	0.00414064	0.00102697	4.03191	5.53253e-05	0.00294432	1.00287	CLLU1	processed_transcript
ENSG00000138190.16	0.0043293	0.00107378	4.03181	5.53479e-05	0.00294432	1.00301	EXOC6	protein_coding
ENSG00000108433.16	-0.00211625	0.000525085	-4.03031	5.5703e-05	0.00295417	0.998534	GOSR2	protein_coding
ENSG00000176597.11	0.00492599	0.00122228	4.03017	5.57372e-05	0.00295417	1.00342	B3GNT5	protein_coding
ENSG00000134061.5	-0.00451173	0.00111975	-4.02922	5.59615e-05	0.00296064	0.996878	CD180	protein_coding
ENSG00000005020.12	0.0053092	0.00131802	4.02815	5.62172e-05	0.00296874	1.00369	SKAP2	protein_coding
ENSG00000244115.1	0.00558036	0.00138571	4.02709	5.64716e-05	0.00297674	1.00388	DNAJC25-GNG10	protein_coding
ENSG00000175029.16	0.00274508	0.000681736	4.0266	5.65893e-05	0.00297752	1.0019	CTBP2	protein_coding
ENSG00000066084.12	0.00311061	0.000772609	4.02611	5.67071e-05	0.0029783	1.00216	DIP2B	protein_coding
ENSG00000260563.3	0.00319268	0.000793521	4.02343	5.73557e-05	0.00300691	1.00222	AC132872.1	lincRNA
ENSG00000138363.14	-0.00264169	0.000656752	-4.02236	5.76183e-05	0.00301522	0.998171	ATIC	protein_coding
ENSG00000132819.16	-0.00804032	0.00199935	-4.02147	5.78356e-05	0.00302113	0.994442	RBM38	protein_coding
ENSG00000157557.11	0.00358441	0.000892092	4.01798	5.86996e-05	0.00306074	1.00249	ETS2	protein_coding
ENSG00000267637.1	0.00599419	0.00149253	4.01613	5.91615e-05	0.00306862	1.00416	AC040904.1	sense_intronic
ENSG00000269038.1	0.00319738	0.000796141	4.0161	5.91688e-05	0.00306862	1.00222	AP001462.1	lincRNA
ENSG00000262332.1	0.00734216	0.00182794	4.01663	5.90359e-05	0.00306862	1.0051	AC136624.1	antisense
ENSG00000173890.16	0.00451477	0.00112481	4.01381	5.97458e-05	0.00309299	1.00313	GPR160	protein_coding
ENSG00000124126.13	0.0045313	0.0011293	4.01248	6.00848e-05	0.00310499	1.00315	PREX1	protein_coding
ENSG00000270330.1	0.00948544	0.00236479	4.01111	6.04333e-05	0.00311743	1.0066	AL009183.1	processed_pseudogene
ENSG00000115607.9	0.00668395	0.00166755	4.00825	6.11715e-05	0.0031499	1.00464	IL18RAP	protein_coding
ENSG00000176390.11	0.00301571	0.000752492	4.00764	6.13291e-05	0.0031524	1.00209	CRLF3	protein_coding
ENSG00000171862.10	0.00452759	0.00113052	4.00489	6.20467e-05	0.00318363	1.00314	PTEN	protein_coding
ENSG00000158201.9	0.00365728	0.000914089	4.00101	6.30717e-05	0.00322082	1.00254	ABHD3	protein_coding
ENSG00000169895.5	0.00179004	0.000447511	3.99998	6.33467e-05	0.00322082	1.00124	SYAP1	protein_coding
ENSG00000038382.19	-0.00356726	0.000891784	-4.00014	6.33048e-05	0.00322082	0.99753	TRIO	protein_coding
ENSG00000163788.13	0.00300197	0.00075056	3.99964	6.34392e-05	0.00322082	1.00208	SNRK	protein_coding
ENSG00000118420.16	-0.00242596	0.000606469	-4.00013	6.33073e-05	0.00322082	0.99832	UBE3D	protein_coding
ENSG00000113749.7	0.00511769	0.00127903	4.00124	6.30117e-05	0.00322082	1.00355	HRH2	protein_coding
ENSG00000273559.4	0.00233166	0.000583191	3.9981	6.38541e-05	0.00323621	1.00162	CWC25	protein_coding
ENSG00000233527.8	-0.00142506	0.000356551	-3.99678	6.42093e-05	0.00324395	0.999013	ZNF529-AS1	antisense
ENSG00000241547.1	-0.00237328	0.000593809	-3.9967	6.42311e-05	0.00324395	0.998356	ACTG1P20	processed_pseudogene
ENSG00000267385.1	0.00468888	0.00117366	3.99509	6.46683e-05	0.00326002	1.00326	AC011498.4	protein_coding
ENSG00000100938.17	0.00287171	0.000718879	3.99471	6.47747e-05	0.00326002	1.00199	GMPR2	protein_coding
ENSG00000215301.10	0.00346111	0.000867163	3.9913	6.57119e-05	0.00329779	1.0024	DDX3X	protein_coding
ENSG00000066027.11	0.0039659	0.000993672	3.99115	6.57529e-05	0.00329779	1.00275	PPP2R5A	protein_coding
ENSG00000248712.7	0.00388003	0.000972397	3.99017	6.60266e-05	0.0032991	1.00269	CCDC153	protein_coding
ENSG00000119314.15	0.00299796	0.000751401	3.98983	6.61211e-05	0.0032991	1.00208	PTBP3	protein_coding
ENSG00000227910.1	-0.0043404	0.00108783	-3.98995	6.60885e-05	0.0032991	0.996996	AC092634.4	transcribed_processed_pseudogene
ENSG00000132010.15	0.00410339	0.00102871	3.98888	6.63851e-05	0.00330657	1.00285	ZNF20	protein_coding
ENSG00000105352.10	0.00546282	0.00137011	3.98714	6.6874e-05	0.00330815	1.00379	CEACAM4	protein_coding
ENSG00000136167.13	0.0034977	0.000877046	3.98805	6.66192e-05	0.00330815	1.00243	LCP1	protein_coding
ENSG00000272021.1	0.00927989	0.00232729	3.98743	6.67942e-05	0.00330815	1.00645	AC008592.5	lincRNA
ENSG00000140932.9	0.00640873	0.0016072	3.98752	6.67689e-05	0.00330815	1.00445	CMTM2	protein_coding
ENSG00000214706.10	-0.00451077	0.00113161	-3.98614	6.7157e-05	0.00331648	0.996878	IFRD2	protein_coding
ENSG00000100266.18	0.00395848	0.000993553	3.98416	6.77191e-05	0.00332829	1.00275	PACSIN2	protein_coding
ENSG00000233030.2	0.00744723	0.00186901	3.98459	6.75971e-05	0.00332829	1.00518	AC243772.2	antisense
ENSG00000233791.5	0.00491207	0.00123292	3.98408	6.77412e-05	0.00332829	1.00341	LINC01136	lincRNA
ENSG00000059588.9	-0.00295208	0.000741232	-3.98266	6.81472e-05	0.00334112	0.997956	TARBP1	protein_coding
ENSG00000173171.14	0.00409048	0.00102715	3.98236	6.82332e-05	0.00334112	1.00284	MTX1	protein_coding
ENSG00000260550.2	0.00748674	0.00188058	3.98108	6.8602e-05	0.0033523	1.0052	AC136618.1	lincRNA
ENSG00000282840.1	0.00653054	0.00164052	3.98077	6.86932e-05	0.0033523	1.00454	AC004554.2	lincRNA
ENSG00000234034.1	0.00193618	0.000486493	3.97988	6.89514e-05	0.00335359	1.00134	AP000959.1	lincRNA
ENSG00000011422.11	0.0042298	0.00106271	3.98019	6.88603e-05	0.00335359	1.00294	PLAUR	protein_coding
ENSG00000175538.10	0.00410998	0.00103321	3.97786	6.95378e-05	0.00337643	1.00285	KCNE3	protein_coding
ENSG00000265666.1	0.00469437	0.00118095	3.97509	7.03512e-05	0.00341021	1.00326	RARA-AS1	antisense
ENSG00000169905.12	0.00155451	0.000391365	3.97202	7.12653e-05	0.00344874	1.00108	TOR1AIP2	protein_coding
ENSG00000108256.8	0.0028184	0.000709698	3.97127	7.14899e-05	0.00345383	1.00196	NUFIP2	protein_coding
ENSG00000178802.17	-0.0025208	0.000635259	-3.96814	7.24352e-05	0.00348206	0.998254	MPI	protein_coding
ENSG00000119979.17	0.00315881	0.000796024	3.96824	7.24061e-05	0.00348206	1.00219	FAM45A	protein_coding
ENSG00000155275.18	-0.00171666	0.000432565	-3.96856	7.23075e-05	0.00348206	0.998811	TRMT44	protein_coding
ENSG00000145860.11	0.0026599	0.000670714	3.96577	7.31579e-05	0.00351097	1.00185	RNF145	protein_coding
ENSG00000048991.16	-0.00173629	0.000438102	-3.96321	7.39479e-05	0.00354301	0.998797	R3HDM1	protein_coding
ENSG00000173614.13	0.00207944	0.000524847	3.96199	7.43288e-05	0.00354951	1.00144	NMNAT1	protein_coding
ENSG00000248559.1	0.00367944	0.000928663	3.96208	7.42981e-05	0.00354951	1.00255	AC109454.2	antisense
ENSG00000168434.12	-0.00200882	0.0005073	-3.95983	7.50027e-05	0.00357579	0.998609	COG7	protein_coding
ENSG00000101019.21	-0.00195973	0.000494954	-3.95942	7.51328e-05	0.0035761	0.998643	UQCC1	protein_coding
ENSG00000105856.13	0.00361129	0.000912624	3.95705	7.58824e-05	0.00360585	1.00251	HBP1	protein_coding
ENSG00000155111.14	0.00320345	0.000809676	3.95645	7.60707e-05	0.00360887	1.00222	CDK19	protein_coding
ENSG00000272689.1	-0.00334462	0.000845774	-3.9545	7.66943e-05	0.00361475	0.997684	AC004832.4	sense_intronic
ENSG00000033800.13	0.00313635	0.000793054	3.95478	7.6605e-05	0.00361475	1.00218	PIAS1	protein_coding
ENSG00000283064.1	0.00327248	0.000827408	3.9551	7.65023e-05	0.00361475	1.00227	AL353759.1	antisense
ENSG00000260583.1	-0.00245036	0.000619542	-3.95511	7.64984e-05	0.00361475	0.998303	LINC00515	antisense
ENSG00000259687.1	0.00570802	0.00144391	3.95317	7.71217e-05	0.00362899	1.00396	LINC01220	lincRNA
ENSG00000170345.9	0.00572177	0.00144869	3.94961	7.82791e-05	0.00367747	1.00397	FOS	protein_coding
ENSG00000232412.1	0.00402175	0.00101944	3.94506	7.9781e-05	0.00374195	1.00279	AL121601.1	lincRNA
ENSG00000204152.10	-0.0021196	0.000537437	-3.94391	8.01647e-05	0.00375386	0.998532	TIMM23B	protein_coding
ENSG00000285480.1	-0.00265552	0.000673643	-3.94202	8.07977e-05	0.0037713	0.998161	AC021097.3	protein_coding
ENSG00000012779.10	0.00411928	0.00104486	3.94241	8.06684e-05	0.0037713	1.00286	ALOX5	protein_coding
ENSG00000114054.13	-0.0015141	0.000384218	-3.94072	8.12363e-05	0.00378566	0.998951	PCCB	protein_coding
ENSG00000100485.11	0.00385273	0.000977786	3.94026	8.13942e-05	0.00378692	1.00267	SOS2	protein_coding
ENSG00000243033.2	-0.00368169	0.000934883	-3.93813	8.21191e-05	0.00381288	0.997451	GAPDHP47	processed_pseudogene
ENSG00000138738.10	0.00497394	0.00126311	3.93785	8.22156e-05	0.00381288	1.00345	PRDM5	protein_coding
ENSG00000122694.15	0.00367695	0.000933922	3.93711	8.2469e-05	0.00381851	1.00255	GLIPR2	protein_coding
ENSG00000164251.4	0.0060636	0.00154111	3.93457	8.33441e-05	0.00385287	1.00421	F2RL1	protein_coding
ENSG00000160712.12	0.00396303	0.00100733	3.93419	8.34775e-05	0.00385288	1.00275	IL6R	protein_coding
ENSG00000147526.19	0.00255394	0.00064924	3.93374	8.36337e-05	0.00385394	1.00177	TACC1	protein_coding
ENSG00000128594.7	0.00505662	0.0012858	3.93267	8.40084e-05	0.00386505	1.00351	LRRC4	protein_coding
ENSG00000248079.2	-0.00263094	0.000669073	-3.93221	8.41669e-05	0.00386539	0.998178	DPH6-DT	lincRNA
ENSG00000085063.15	0.00322757	0.00082087	3.93188	8.42829e-05	0.00386539	1.00224	CD59	protein_coding
ENSG00000279077.1	-0.00284981	0.000724893	-3.93136	8.44674e-05	0.00386772	0.998027	AC023090.2	TEC
ENSG00000141968.7	0.00298761	0.000760243	3.92981	8.50134e-05	0.00388658	1.00207	VAV1	protein_coding
ENSG00000221817.9	-0.00173911	0.000442628	-3.92906	8.52778e-05	0.00389251	0.998795	PPP3CB-AS1	processed_transcript
ENSG00000101346.13	-0.0022938	0.000584034	-3.9275	8.58328e-05	0.00389314	0.998411	POFUT1	protein_coding
ENSG00000085415.15	-0.00158465	0.000403539	-3.92688	8.60555e-05	0.00389314	0.998902	SEH1L	protein_coding
ENSG00000150403.17	0.00238113	0.000606344	3.92703	8.6002e-05	0.00389314	1.00165	TMCO3	protein_coding
ENSG00000223336.1	0.00523458	0.00133299	3.92696	8.6025e-05	0.00389314	1.00363	RNU2-6P	snRNA
ENSG00000072952.18	0.00514061	0.0013088	3.92774	8.57493e-05	0.00389314	1.00357	MRVI1	protein_coding
ENSG00000272407.1	-0.00460571	0.0011729	-3.92676	8.60988e-05	0.00389314	0.996813	AL022394.1	transcribed_processed_pseudogene
ENSG00000116120.9	-0.00267299	0.000681293	-3.92341	8.73051e-05	0.00394153	0.998149	FARSB	protein_coding
ENSG00000067836.12	-0.00549313	0.00140029	-3.92285	8.75092e-05	0.00394459	0.9962	ROGDI	protein_coding
ENSG00000171295.12	0.00211784	0.000540872	3.9156	9.01786e-05	0.00405348	1.00147	ZNF440	protein_coding
ENSG00000198933.9	0.00478216	0.00122161	3.91463	9.05415e-05	0.00405348	1.00332	TBKBP1	protein_coding
ENSG00000010318.20	-0.00191155	0.000488336	-3.91441	9.06253e-05	0.00405348	0.998676	PHF7	protein_coding
ENSG00000182923.17	0.00338015	0.000863443	3.91473	9.05049e-05	0.00405348	1.00235	CEP63	protein_coding
ENSG00000200086.1	0.00440345	0.00112492	3.91444	9.06139e-05	0.00405348	1.00306	RNU6-433P	snRNA
ENSG00000112941.13	-0.00260518	0.000665637	-3.91381	9.08507e-05	0.0040573	0.998196	TENT4A	protein_coding
ENSG00000207698.1	-0.00428626	0.00109566	-3.91203	9.15221e-05	0.00408098	0.997033	MIR32	miRNA
ENSG00000186812.12	0.00194248	0.000496715	3.91065	9.20463e-05	0.00408547	1.00135	ZNF397	protein_coding
ENSG00000111647.12	0.00367872	0.000940658	3.91079	9.19953e-05	0.00408547	1.00255	UHRF1BP1L	protein_coding
ENSG00000127948.15	0.0036682	0.000937935	3.91094	9.19395e-05	0.00408547	1.00255	POR	protein_coding
ENSG00000159335.15	-0.00741428	0.00189618	-3.91012	9.22499e-05	0.00408824	0.994874	PTMS	protein_coding
ENSG00000143367.15	0.00380032	0.000972268	3.90872	9.27883e-05	0.00410581	1.00264	TUFT1	protein_coding
ENSG00000214013.9	-0.00213992	0.000547663	-3.90736	9.33086e-05	0.00411765	0.998518	GANC	protein_coding
ENSG00000135636.13	0.00653176	0.00167169	3.90728	9.33404e-05	0.00411765	1.00454	DYSF	protein_coding
ENSG00000258355.1	0.00464085	0.00118982	3.90048	9.60034e-05	0.00422395	1.00322	AC079174.1	sense_intronic
ENSG00000104324.15	0.00350958	0.000899806	3.90038	9.6042e-05	0.00422395	1.00244	CPQ	protein_coding
ENSG00000076662.9	0.00397009	0.00101853	3.89786	9.70468e-05	0.00426166	1.00276	ICAM3	protein_coding
ENSG00000205537.2	0.00615588	0.00158013	3.89582	9.78691e-05	0.00429126	1.00428	AC121338.1	antisense
ENSG00000139505.11	0.00390171	0.00100167	3.89521	9.8113e-05	0.00429545	1.00271	MTMR6	protein_coding
ENSG00000214456.8	0.00466855	0.00119872	3.89463	9.83503e-05	0.00429933	1.00324	PLIN5	protein_coding
ENSG00000176422.13	-0.00203	0.000521527	-3.89241	9.92514e-05	0.00433218	0.998594	SPRYD4	protein_coding
ENSG00000101596.15	0.004319	0.00111023	3.89019	0.000100165	0.00436547	1.003	SMCHD1	protein_coding
ENSG00000163297.16	0.0030107	0.000774303	3.88827	0.000100961	0.00439357	1.00209	ANTXR2	protein_coding
ENSG00000254477.2	0.00365531	0.000940319	3.88731	0.000101361	0.00439774	1.00254	AP000640.1	processed_transcript
ENSG00000139514.12	-0.00323461	0.000832041	-3.88756	0.000101256	0.00439774	0.99776	SLC7A1	protein_coding
ENSG00000213903.8	0.00419019	0.00107837	3.88566	0.000102052	0.0044211	1.00291	LTB4R	protein_coding
ENSG00000072401.14	0.00538893	0.00138794	3.88267	0.000103314	0.00446906	1.00374	UBE2D1	protein_coding
ENSG00000257715.1	0.00692571	0.00178439	3.88126	0.000103915	0.00448834	1.00481	AC007298.1	antisense
ENSG00000214812.3	0.00532364	0.00137193	3.88041	0.000104282	0.00449751	1.0037	AL137792.1	processed_pseudogene
ENSG00000100413.16	-0.00253605	0.000653917	-3.87824	0.000105213	0.00450423	0.998244	POLR3H	protein_coding
ENSG00000279180.1	0.00607782	0.00156658	3.87967	0.000104598	0.00450423	1.00422	AC061709.2	TEC
ENSG00000260822.1	0.00303127	0.00078161	3.87824	0.000105217	0.00450423	1.0021	AC004656.1	sense_overlapping
ENSG00000277473.1	0.00529445	0.00136507	3.87851	0.000105097	0.00450423	1.00368	RF00017	misc_RNA
ENSG00000174206.12	-0.00221817	0.000571928	-3.87841	0.000105143	0.00450423	0.998464	C12orf66	protein_coding
ENSG00000204392.10	-0.00188843	0.000487139	-3.87658	0.000105936	0.00452833	0.998692	LSM2	protein_coding
ENSG00000278991.1	-0.00438531	0.00113233	-3.8728	0.000107592	0.00459234	0.996965	AC090181.3	TEC
ENSG00000197579.7	0.00481937	0.00124493	3.8712	0.0001083	0.00461577	1.00335	TOPORS	protein_coding
ENSG00000110080.18	0.00472412	0.00122103	3.86896	0.000109301	0.00464448	1.00328	ST3GAL4	protein_coding
ENSG00000225527.1	-0.00378768	0.000979039	-3.86877	0.000109387	0.00464448	0.997378	AL450384.1	antisense
ENSG00000285725.1	-0.00274333	0.000709125	-3.86861	0.000109456	0.00464448	0.9981	AC004967.2	processed_transcript
ENSG00000188026.12	0.00331381	0.000856667	3.86826	0.000109616	0.00464449	1.0023	RILPL1	protein_coding
ENSG00000183762.12	0.00657002	0.0016987	3.86768	0.000109877	0.00464871	1.00456	KREMEN1	protein_coding
ENSG00000211663.2	-0.00930675	0.0024067	-3.86701	0.000110177	0.00465463	0.99357	IGLV3-19	IG_V_gene
ENSG00000138071.13	0.00335581	0.000868291	3.86484	0.00011116	0.00468931	1.00233	ACTR2	protein_coding
ENSG00000260452.1	0.00410186	0.00106168	3.86357	0.000111741	0.00470694	1.00285	TPRKBP2	processed_pseudogene
ENSG00000158615.8	0.00269395	0.000697975	3.85967	0.000113542	0.00477588	1.00187	PPP1R15B	protein_coding
ENSG00000139496.15	0.00308805	0.000800352	3.85836	0.00011415	0.00479446	1.00214	NUP58	protein_coding
ENSG00000231507.1	0.00595673	0.00154447	3.85682	0.000114871	0.00481777	1.00414	LINC01353	lincRNA
ENSG00000267904.1	-0.00217508	0.000564279	-3.85461	0.000115913	0.00485444	0.998493	AC024075.1	sense_intronic
ENSG00000184465.16	-0.00309969	0.000804282	-3.85399	0.000116208	0.00485976	0.997854	WDR27	protein_coding
ENSG00000136536.14	0.00387311	0.00100534	3.85255	0.000116892	0.00488081	1.00269	2023-03-07	protein_coding
ENSG00000182247.9	-0.00300202	0.000779295	-3.85223	0.000117049	0.00488081	0.997921	UBE2E2	protein_coding
ENSG00000176834.13	0.00534121	0.0013873	3.85009	0.000118076	0.00491657	1.00371	VSIG10	protein_coding
ENSG00000198879.11	-0.00262631	0.000682207	-3.84972	0.000118251	0.00491674	0.998181	SFMBT2	protein_coding
ENSG00000234946.1	-0.0049927	0.00129721	-3.8488	0.0001187	0.0049213	0.996545	SDHCP3	processed_pseudogene
ENSG00000155265.10	-0.00361627	0.000939582	-3.84881	0.000118693	0.0049213	0.997497	GOLGA7B	protein_coding
ENSG00000182310.14	0.00487588	0.00126833	3.84432	0.000120887	0.00499145	1.00339	SPACA6	protein_coding
ENSG00000138592.13	0.00149726	0.000389482	3.84423	0.000120933	0.00499145	1.00104	USP8	protein_coding
ENSG00000071537.13	0.00254504	0.000662093	3.84392	0.000121082	0.00499145	1.00177	SEL1L	protein_coding
ENSG00000145012.13	0.00217732	0.00056642	3.844	0.000121045	0.00499145	1.00151	LPP	protein_coding
ENSG00000116984.12	-0.00226223	0.000588593	-3.84346	0.000121311	0.00499378	0.998433	MTR	protein_coding
ENSG00000233220.3	0.0044726	0.00116395	3.84261	0.000121734	0.00499583	1.0031	LINC00167	lincRNA
ENSG00000234572.1	-0.00622016	0.001619	-3.84197	0.000122052	0.00499583	0.995698	LINC01800	lincRNA
ENSG00000027697.14	0.00494875	0.00128791	3.84246	0.000121809	0.00499583	1.00344	IFNGR1	protein_coding
ENSG00000129292.20	0.00411849	0.00107193	3.84214	0.000121964	0.00499583	1.00286	PHF20L1	protein_coding
ENSG00000198060.9	0.00221554	0.000576764	3.84133	0.000122368	0.00500172	1.00154	2023-03-05	protein_coding
ENSG00000116455.13	-0.00247106	0.000643583	-3.83953	0.000123272	0.00502546	0.998289	WDR77	protein_coding
ENSG00000112182.14	-0.00443035	0.00115389	-3.83948	0.000123297	0.00502546	0.996934	BACH2	protein_coding
ENSG00000115594.11	0.00617069	0.00160734	3.83906	0.000123507	0.00502695	1.00429	IL1R1	protein_coding
ENSG00000261000.1	-0.00433251	0.00112871	-3.83845	0.000123811	0.00503227	0.997001	AC244034.2	lincRNA
ENSG00000187097.12	-0.00310888	0.000810449	-3.83599	0.000125059	0.00507585	0.997847	ENTPD5	protein_coding
ENSG00000255314.3	0.0050388	0.00131455	3.83309	0.000126542	0.0051074	1.0035	AC024475.4	lincRNA
ENSG00000164506.14	0.00396103	0.00103327	3.8335	0.00012633	0.0051074	1.00275	STXBP5	protein_coding
ENSG00000180871.7	0.00528257	0.00137801	3.83348	0.000126344	0.0051074	1.00367	CXCR2	protein_coding
ENSG00000238228.1	-0.00426164	0.00111172	-3.83338	0.000126394	0.0051074	0.99705	OR7E7P	unprocessed_pseudogene
ENSG00000139946.9	0.00337201	0.000880397	3.8301	0.000128091	0.00516272	1.00234	PELI2	protein_coding
ENSG00000007923.15	-0.00224354	0.000585919	-3.8291	0.000128614	0.00517657	0.998446	DNAJC11	protein_coding
ENSG00000018280.16	0.00512883	0.00134083	3.8251	0.000130718	0.00525394	1.00356	SLC11A1	protein_coding
ENSG00000182782.7	0.00543689	0.00142217	3.82295	0.000131866	0.00529276	1.00378	HCAR2	protein_coding
ENSG00000273141.1	0.00586641	0.00153506	3.82161	0.000132586	0.00531426	1.00407	AP001269.4	antisense
ENSG00000262227.1	-0.00245129	0.000641541	-3.82093	0.000132947	0.00532015	0.998302	AC004771.3	antisense
ENSG00000182831.11	0.0027056	0.000708166	3.82057	0.000133145	0.00532015	1.00188	C16orf72	protein_coding
ENSG00000116815.15	0.00318558	0.000833853	3.82031	0.000133284	0.00532015	1.00221	CD58	protein_coding
ENSG00000130821.15	-0.00910525	0.00238472	-3.81816	0.000134449	0.00535926	0.993709	SLC6A8	protein_coding
ENSG00000169084.13	0.00362529	0.000949673	3.81741	0.000134859	0.00536822	1.00252	DHRSX	protein_coding
ENSG00000159128.14	0.00358509	0.000939531	3.81583	0.000135729	0.00538837	1.00249	IFNGR2	protein_coding
ENSG00000076685.18	0.00334652	0.000877015	3.81581	0.000135738	0.00538837	1.00232	NT5C2	protein_coding
ENSG00000135870.11	0.00250127	0.000656086	3.81241	0.000137619	0.00545557	1.00174	RC3H1	protein_coding
ENSG00000009694.13	0.00616207	0.00161691	3.81101	0.000138401	0.00545665	1.00428	TENM1	protein_coding
ENSG00000188315.7	0.00316913	0.000831513	3.81128	0.000138249	0.00545665	1.0022	C3orf62	protein_coding
ENSG00000120942.13	-0.00210925	0.000553384	-3.81155	0.0001381	0.00545665	0.998539	UBIAD1	protein_coding
ENSG00000154997.8	0.00473916	0.00124352	3.81109	0.000138357	0.00545665	1.00329	2023-09-14	protein_coding
ENSG00000173585.15	-0.00679501	0.00178369	-3.80951	0.000139241	0.0054823	0.995301	CCR9	protein_coding
ENSG00000100030.14	0.002643	0.000693946	3.80866	0.000139722	0.00549379	1.00183	MAPK1	protein_coding
ENSG00000146859.6	0.00431272	0.00113286	3.80693	0.000140703	0.00552484	1.00299	TMEM140	protein_coding
ENSG00000137177.19	0.00393782	0.00103521	3.8039	0.000142434	0.00558523	1.00273	KIF13A	protein_coding
ENSG00000116991.10	0.00564784	0.00148546	3.80209	0.000143481	0.00561868	1.00392	SIPA1L2	protein_coding
ENSG00000089012.14	-0.00414574	0.00109097	-3.80005	0.000144668	0.00565751	0.997131	SIRPG	protein_coding
ENSG00000182307.13	-0.00176707	0.000465136	-3.79903	0.000145261	0.00567301	0.998776	C8orf33	protein_coding
ENSG00000157107.13	0.00466479	0.00122802	3.79862	0.000145501	0.00567475	1.00324	FCHO2	protein_coding
ENSG00000240244.3	0.00438126	0.00115365	3.79774	0.00014602	0.00568732	1.00304	GAPDHP33	processed_pseudogene
ENSG00000234694.1	-0.00234737	0.000618186	-3.79718	0.000146351	0.00569254	0.998374	AL139289.2	antisense
ENSG00000132475.10	0.00377921	0.000995956	3.79455	0.000147911	0.00573779	1.00262	H3F3B	protein_coding
ENSG00000208022.1	0.00535387	0.00141082	3.79487	0.000147718	0.00573779	1.00372	MIR618	miRNA
ENSG00000024048.10	0.00303865	0.000801148	3.79288	0.000148912	0.00576891	1.00211	UBR2	protein_coding
ENSG00000233674.2	-0.00341368	0.000900594	-3.79048	0.000150358	0.00581711	0.997637	AL451062.2	processed_pseudogene
ENSG00000149573.8	0.00464491	0.0012259	3.78896	0.000151277	0.00583708	1.00322	MPZL2	protein_coding
ENSG00000145868.16	0.00264624	0.000698371	3.78916	0.000151158	0.00583708	1.00184	FBXO38	protein_coding
ENSG00000134982.16	0.00346418	0.00091475	3.78702	0.000152463	0.00587501	1.0024	APC	protein_coding
ENSG00000136840.18	-0.00701668	0.0018534	-3.78584	0.000153188	0.0058951	0.995148	ST6GALNAC4	protein_coding
ENSG00000198961.9	0.00346185	0.000915091	3.78307	0.000154906	0.00595328	1.0024	PJA2	protein_coding
ENSG00000156052.10	0.00316796	0.000838015	3.78032	0.00015663	0.00601156	1.0022	GNAQ	protein_coding
ENSG00000187566.5	-0.00174467	0.00046159	-3.7797	0.000157019	0.00601852	0.998791	NHLRC1	protein_coding
ENSG00000214954.8	-0.00232682	0.000615707	-3.77911	0.00015739	0.00602475	0.998388	LRRC69	protein_coding
ENSG00000104915.14	0.00340263	0.000900766	3.77748	0.000158421	0.0060562	1.00236	STX10	protein_coding
ENSG00000125124.11	-0.00268702	0.000711637	-3.77583	0.000159473	0.00608838	0.998139	BBS2	protein_coding
ENSG00000278829.1	0.00296188	0.000784606	3.77499	0.000160016	0.00610105	1.00206	AC099811.5	sense_intronic
ENSG00000285838.1	0.00564003	0.00149428	3.77442	0.000160382	0.00610698	1.00392	AL646090.2	lincRNA
ENSG00000177873.12	-0.00149689	0.00039666	-3.77374	0.000160818	0.0061155	0.998963	ZNF619	protein_coding
ENSG00000273472.1	-0.0043873	0.00116291	-3.77269	0.000161497	0.00613327	0.996964	AC096733.2	lincRNA
ENSG00000119541.9	0.00276502	0.00073305	3.77194	0.000161983	0.00614368	1.00192	VPS4B	protein_coding
ENSG00000231999.6	-0.00286051	0.000758447	-3.77153	0.000162249	0.00614569	0.998019	LRRC8C-DT	antisense
ENSG00000217555.12	0.00427198	0.00113332	3.76944	0.000163611	0.0061892	1.00297	CKLF	protein_coding
ENSG00000171953.15	-0.00198052	0.000525876	-3.76613	0.000165798	0.00626375	0.998628	ATPAF2	protein_coding
ENSG00000280181.1	0.0036506	0.000969475	3.76554	0.00016619	0.00627037	1.00253	AC025262.2	TEC
ENSG00000138185.19	0.00363372	0.000965624	3.76308	0.000167832	0.00632406	1.00252	ENTPD1	protein_coding
ENSG00000131378.13	-0.0024545	0.000652354	-3.76253	0.000168201	0.00632972	0.9983	RFTN1	protein_coding
ENSG00000012048.21	0.00318255	0.000846094	3.76146	0.000168927	0.00634879	1.00221	BRCA1	protein_coding
ENSG00000144118.13	0.00393537	0.00104637	3.76098	0.000169248	0.00635261	1.00273	RALB	protein_coding
ENSG00000222365.1	0.00405759	0.00107949	3.75879	0.000170735	0.00640015	1.00282	SNORD12B	snoRNA
ENSG00000249859.9	-0.00320084	0.000851912	-3.75725	0.000171794	0.0064315	0.997784	PVT1	lincRNA
ENSG00000230082.1	-0.00400117	0.00106526	-3.75605	0.000172614	0.00645385	0.99723	PRRT3-AS1	antisense
ENSG00000116679.15	0.00311928	0.000830563	3.75562	0.000172913	0.00645669	1.00216	IVNS1ABP	protein_coding
ENSG00000131844.15	-0.00194032	0.000516694	-3.75526	0.000173163	0.00645767	0.998656	MCCC2	protein_coding
ENSG00000283525.1	0.0102233	0.00272381	3.75331	0.000174516	0.00649977	1.00711	AC005622.1	transcribed_unprocessed_pseudogene
ENSG00000179841.8	0.0052624	0.00140243	3.75235	0.000175183	0.00651622	1.00365	AKAP5	protein_coding
ENSG00000197930.12	0.00366993	0.000978458	3.75072	0.000176324	0.00652512	1.00255	ERO1A	protein_coding
ENSG00000203804.4	0.00426103	0.00113591	3.75121	0.000175986	0.00652512	1.00296	ADAMTSL4-AS1	processed_transcript
ENSG00000150457.8	0.00269276	0.000717841	3.75119	0.000175996	0.00652512	1.00187	LATS2	protein_coding
ENSG00000165131.6	0.00758682	0.00202272	3.7508	0.000176272	0.00652512	1.00527	LLCFC1	protein_coding
ENSG00000267766.1	-0.00670167	0.00178708	-3.75006	0.000176789	0.00653398	0.995366	AC022726.1	sense_intronic
ENSG00000182308.6	0.00360629	0.000961764	3.74966	0.000177072	0.00653609	1.0025	DCAF4L1	protein_coding
ENSG00000114770.16	0.00355324	0.000948528	3.74606	0.000179637	0.00662232	1.00247	ABCC5	protein_coding
ENSG00000163393.12	0.00396435	0.00105871	3.7445	0.000180752	0.00665495	1.00275	SLC22A15	protein_coding
ENSG00000263956.6	-0.00252967	0.000675673	-3.74393	0.000181165	0.00666167	0.998248	NBPF11	protein_coding
ENSG00000254694.1	-0.0029956	0.000800357	-3.74283	0.000181957	0.00667384	0.997926	AP001893.1	antisense
ENSG00000198561.13	-0.00339423	0.000906851	-3.74288	0.000181924	0.00667384	0.99765	CTNND1	protein_coding
ENSG00000213722.8	0.0031877	0.000851832	3.74216	0.000182442	0.00668315	1.00221	DDAH2	protein_coding
ENSG00000279491.1	0.00274637	0.000734202	3.74062	0.000183568	0.0067074	1.00191	AP003733.4	TEC
ENSG00000271646.1	0.00335363	0.000896502	3.74079	0.000183443	0.0067074	1.00233	AC099343.3	bidirectional_promoter_lncRNA
ENSG00000139278.9	0.0040744	0.00108935	3.74023	0.000183854	0.0067094	1.00283	GLIPR1	protein_coding
ENSG00000166326.6	-0.00189532	0.00050685	-3.7394	0.000184457	0.00672291	0.998687	TRIM44	protein_coding
ENSG00000278112.1	0.00782742	0.00209343	3.73905	0.000184717	0.00672393	1.00544	AC145423.3	sense_intronic
ENSG00000224536.2	-0.00305708	0.000817781	-3.73826	0.000185295	0.00673651	0.997883	AC096677.1	antisense
ENSG00000120215.9	0.00314633	0.000841727	3.73795	0.000185529	0.00673655	1.00218	MLANA	protein_coding
ENSG00000160563.13	-0.00197863	0.000529401	-3.7375	0.00018586	0.00673775	0.998629	MED27	protein_coding
ENSG00000166439.5	0.00246153	0.000658754	3.73664	0.000186494	0.00673775	1.00171	RNF169	protein_coding
ENSG00000138764.14	0.00335627	0.000898128	3.73697	0.000186254	0.00673775	1.00233	CCNG2	protein_coding
ENSG00000178199.13	-0.00301859	0.000807811	-3.73675	0.000186413	0.00673775	0.99791	ZC3H12D	protein_coding
ENSG00000132334.16	0.00311846	0.000835208	3.73375	0.000188647	0.00680705	1.00216	PTPRE	protein_coding
ENSG00000104299.14	-0.00165284	0.00044279	-3.73278	0.000189381	0.00682503	0.998855	INTS9	protein_coding
ENSG00000119900.8	0.00472177	0.00126535	3.7316	0.00019027	0.00684855	1.00328	OGFRL1	protein_coding
ENSG00000204592.8	0.00325707	0.000873108	3.73043	0.000191151	0.00686913	1.00226	HLA-E	protein_coding
ENSG00000166900.16	0.00406594	0.00109	3.73021	0.000191317	0.00686913	1.00282	STX3	protein_coding
ENSG00000175274.18	0.00557573	0.00149538	3.72865	0.000192511	0.00690344	1.00387	TP53I11	protein_coding
ENSG00000258365.1	-0.00423349	0.00113588	-3.72705	0.000193737	0.00693879	0.99707	AC073655.2	antisense
ENSG00000200855.1	-0.00388126	0.00104173	-3.72578	0.000194711	0.00695647	0.997313	RF00019	misc_RNA
ENSG00000251230.5	0.0059742	0.00160334	3.72609	0.000194472	0.00695647	1.00415	MIR3945HG	lincRNA
ENSG00000125753.13	0.00374247	0.00100459	3.72535	0.000195041	0.00695967	1.0026	VASP	protein_coding
ENSG00000234663.6	-0.00288787	0.000775334	-3.72468	0.000195564	0.00696973	0.998	LINC01934	lincRNA
ENSG00000184730.10	0.00460652	0.00123747	3.72252	0.000197245	0.00701238	1.0032	APOBR	protein_coding
ENSG00000120658.13	0.00652926	0.00175385	3.72282	0.000197013	0.00701238	1.00454	ENOX1	protein_coding
ENSG00000234638.1	0.00344125	0.000925035	3.72013	0.000199118	0.00706203	1.00239	AC053503.4	antisense
ENSG00000054523.17	0.00376243	0.00101137	3.72012	0.00019913	0.00706203	1.00261	KIF1B	protein_coding
ENSG00000137642.12	0.0041525	0.00111656	3.71903	0.00019999	0.00708386	1.00288	SORL1	protein_coding
ENSG00000198216.11	0.00632304	0.00170097	3.71731	0.000201356	0.00712351	1.00439	CACNA1E	protein_coding
ENSG00000175931.12	-0.00615971	0.0016584	-3.71424	0.000203812	0.0072016	0.99574	UBE2O	protein_coding
ENSG00000141564.14	-0.00325367	0.000876234	-3.71324	0.000204621	0.00722139	0.997747	RPTOR	protein_coding
ENSG00000075914.12	-0.00213642	0.000575457	-3.71255	0.000205179	0.00723226	0.99852	EXOSC7	protein_coding
ENSG00000171988.18	0.003283	0.000884665	3.71101	0.000206436	0.00726413	1.00228	JMJD1C	protein_coding
ENSG00000241665.3	0.00267828	0.000721807	3.71052	0.000206837	0.00726413	1.00186	RN7SL418P	misc_RNA
ENSG00000062716.12	0.00368538	0.000993218	3.71054	0.000206814	0.00726413	1.00256	VMP1	protein_coding
ENSG00000019144.18	0.00477132	0.00128619	3.70967	0.000207531	0.00727338	1.00331	PHLDB1	protein_coding
ENSG00000115137.11	-0.00206218	0.000555908	-3.70958	0.000207603	0.00727338	0.998572	DNAJC27	protein_coding
ENSG00000169228.13	0.00377503	0.00101784	3.70887	0.000208183	0.00728491	1.00262	RAB24	protein_coding
ENSG00000124875.9	0.00673149	0.00181536	3.70808	0.000208836	0.0072912	1.00468	CXCL6	protein_coding
ENSG00000119383.19	-0.00255941	0.000690232	-3.70804	0.000208867	0.0072912	0.998228	PTPA	protein_coding
ENSG00000236352.1	0.00669418	0.00180563	3.70739	0.000209409	0.00730132	1.00465	AC005220.1	antisense
ENSG00000260267.1	-0.00271295	0.000731973	-3.70635	0.000210266	0.00731358	0.998121	AC026471.1	antisense
ENSG00000125485.17	-0.0023143	0.000624409	-3.70639	0.000210232	0.00731358	0.998397	DDX31	protein_coding
ENSG00000229728.1	-0.00262907	0.000709712	-3.70441	0.000211884	0.00735216	0.998179	AL136531.1	antisense
ENSG00000118515.11	0.00381257	0.00102914	3.70461	0.000211715	0.00735216	1.00265	SGK1	protein_coding
ENSG00000092200.12	0.0043986	0.00118824	3.70177	0.000214101	0.0074202	1.00305	RPGRIP1	protein_coding
ENSG00000182919.14	0.00289914	0.000783368	3.70087	0.000214864	0.00743772	1.00201	C11orf54	protein_coding
ENSG00000217083.1	0.00612935	0.00165636	3.7005	0.000215177	0.00743967	1.00426	MTCO2P33	processed_pseudogene
ENSG00000285258.1	0.00300148	0.000811272	3.69972	0.000215839	0.00745366	1.00208	ATXN7	protein_coding
ENSG00000171865.9	-0.0015323	0.000414343	-3.69815	0.000217178	0.00749097	0.998938	RNASEH1	protein_coding
ENSG00000163900.10	-0.00134557	0.0003641	-3.69561	0.000219361	0.00754949	0.999068	TMEM41A	protein_coding
ENSG00000148606.12	-0.00152036	0.000411402	-3.69557	0.000219397	0.00754949	0.998947	POLR3A	protein_coding
ENSG00000204599.14	0.0019962	0.000540281	3.69474	0.000220109	0.007565	1.00138	TRIM39	protein_coding
ENSG00000184470.20	-0.00342208	0.000927295	-3.69039	0.000223911	0.00767746	0.997631	TXNRD2	protein_coding
ENSG00000140961.12	0.00670229	0.00181615	3.69039	0.00022391	0.00767746	1.00466	OSGIN1	protein_coding
ENSG00000228590.2	-0.00525179	0.00142353	-3.68927	0.000224894	0.00770203	0.996366	MIR4432HG	lincRNA
ENSG00000156675.15	0.00383557	0.00104025	3.68715	0.000226782	0.00775749	1.00266	RAB11FIP1	protein_coding
ENSG00000089818.17	0.00132493	0.000359466	3.68582	0.000227967	0.00777963	1.00092	NECAP1	protein_coding
ENSG00000207763.1	0.00540331	0.00146589	3.68601	0.000227793	0.00777963	1.00375	MIR617	miRNA
ENSG00000142867.13	0.0025036	0.000679401	3.68501	0.000228689	0.00778942	1.00174	BCL10	protein_coding
ENSG00000104343.19	0.0043743	0.00118709	3.6849	0.000228792	0.00778942	1.00304	UBE2W	protein_coding
ENSG00000136048.13	0.00254666	0.000691364	3.68353	0.000230025	0.00782219	1.00177	DRAM1	protein_coding
ENSG00000160193.11	-0.00314666	0.000854454	-3.68265	0.000230818	0.00783994	0.997821	WDR4	protein_coding
ENSG00000226498.2	-0.00407134	0.00110608	-3.68089	0.000232426	0.00788531	0.997182	RPSAP21	transcribed_processed_pseudogene
ENSG00000141279.15	0.00239999	0.000652275	3.67941	0.000233771	0.00792166	1.00166	NPEPPS	protein_coding
ENSG00000172878.13	-0.00322491	0.000877271	-3.67607	0.000236853	0.00801672	0.997767	METAP1D	protein_coding
ENSG00000197771.12	0.00268414	0.000730324	3.67527	0.000237599	0.00803257	1.00186	MCMBP	protein_coding
ENSG00000130703.16	0.00298058	0.000811479	3.67302	0.000239701	0.00809416	1.00207	OSBPL2	protein_coding
ENSG00000241157.1	0.00468866	0.00127718	3.67111	0.000241503	0.00814551	1.00326	AC104763.1	processed_pseudogene
ENSG00000008438.4	0.00640911	0.001746	3.67073	0.000241858	0.008148	1.00445	PGLYRP1	protein_coding
ENSG00000165355.7	0.00308018	0.000839438	3.66933	0.000243184	0.00818315	1.00214	FBXO33	protein_coding
ENSG00000125538.11	0.00453615	0.00123639	3.66888	0.000243617	0.00818819	1.00315	IL1B	protein_coding
ENSG00000248774.1	0.00429412	0.00117085	3.66752	0.000244916	0.0082223	1.00298	AC097534.1	antisense
ENSG00000141526.16	0.00401109	0.0010939	3.66677	0.000245638	0.00822781	1.00278	SLC16A3	protein_coding
ENSG00000274929.1	0.00324548	0.000885182	3.66646	0.000245933	0.00822781	1.00225	AL157813.1	sense_intronic
ENSG00000189283.9	-0.00499274	0.00136167	-3.66663	0.000245766	0.00822781	0.996545	FHIT	protein_coding
ENSG00000279189.1	0.00342964	0.000935592	3.66574	0.00024662	0.00824128	1.00238	AP003972.1	TEC
ENSG00000164754.14	0.00312899	0.000854023	3.66383	0.000248476	0.00829372	1.00217	RAD21	protein_coding
ENSG00000157540.20	0.00177412	0.000484692	3.66032	0.000251904	0.00839843	1.00123	DYRK1A	protein_coding
ENSG00000035664.11	0.00426839	0.00116643	3.65938	0.00025283	0.0084196	1.00296	DAPK2	protein_coding
ENSG00000135966.12	-0.00198403	0.000542355	-3.65817	0.000254022	0.00844958	0.998626	TGFBRAP1	protein_coding
ENSG00000100360.14	-0.00201169	0.00055031	-3.65556	0.000256617	0.00851006	0.998607	IFT27	protein_coding
ENSG00000232021.6	-0.00489793	0.00133995	-3.65531	0.000256868	0.00851006	0.996611	LEF1-AS1	processed_transcript
ENSG00000010270.13	0.00254496	0.000696161	3.6557	0.000256479	0.00851006	1.00177	STARD3NL	protein_coding
ENSG00000129749.3	0.00325234	0.000889792	3.65517	0.000257016	0.00851006	1.00226	CHRNA10	protein_coding
ENSG00000144655.14	0.00423473	0.00115964	3.65176	0.000260451	0.00859231	1.00294	CSRNP1	protein_coding
ENSG00000079819.18	-0.00299239	0.000819476	-3.65158	0.00026063	0.00859231	0.997928	EPB41L2	protein_coding
ENSG00000188921.13	0.00297463	0.000814628	3.65152	0.000260688	0.00859231	1.00206	HACD4	protein_coding
ENSG00000226676.1	-0.00532891	0.00145918	-3.65199	0.000260216	0.00859231	0.996313	BX248123.1	lincRNA
ENSG00000135407.10	0.0044886	0.00122949	3.65079	0.000261438	0.00859744	1.00312	AVIL	protein_coding
ENSG00000103550.13	-0.00138617	0.000379674	-3.65094	0.000261284	0.00859744	0.99904	KNOP1	protein_coding
ENSG00000163534.14	-0.00658492	0.00180402	-3.65014	0.000262097	0.00860935	0.995446	FCRL1	protein_coding
ENSG00000203814.6	0.0037393	0.00102474	3.64903	0.000263229	0.00862865	1.0026	HIST2H2BF	protein_coding
ENSG00000166169.16	-0.00414569	0.00113612	-3.64898	0.000263281	0.00862865	0.997131	POLL	protein_coding
ENSG00000279447.1	0.00644945	0.00176814	3.6476	0.0002647	0.00866534	1.00448	AL118508.4	TEC
ENSG00000282602.1	0.0046682	0.00128056	3.64542	0.000266957	0.00871949	1.00324	Z82244.2	lincRNA
ENSG00000080371.5	0.0021798	0.000597928	3.64559	0.000266777	0.00871949	1.00151	RAB21	protein_coding
ENSG00000243005.3	-0.00161398	0.000442813	-3.64483	0.000267567	0.00872956	0.998882	RN7SL16P	misc_RNA
ENSG00000140332.15	0.00422276	0.0011587	3.64441	0.000268003	0.00873395	1.00293	TLE3	protein_coding
ENSG00000198736.11	0.00430498	0.00118178	3.64281	0.00026968	0.00877869	1.00299	MSRB1	protein_coding
ENSG00000269246.1	0.00496872	0.00136414	3.64237	0.000270139	0.00878376	1.00345	AC011445.2	lincRNA
ENSG00000231509.1	0.00524961	0.00144155	3.64165	0.000270895	0.00879846	1.00365	AL162253.1	lincRNA
ENSG00000058600.15	-0.00215169	0.000591329	-3.63875	0.000273969	0.00888833	0.99851	POLR3E	protein_coding
ENSG00000101109.11	0.00226742	0.000623559	3.63626	0.00027663	0.0089646	1.00157	STK4	protein_coding
ENSG00000185650.9	0.00374921	0.00103141	3.63505	0.000277932	0.00899673	1.0026	ZFP36L1	protein_coding
ENSG00000170915.8	-0.00254456	0.000700124	-3.63444	0.000278587	0.00900784	0.998238	PAQR8	protein_coding
ENSG00000102882.11	0.00362106	0.000996546	3.6336	0.000279489	0.00902693	1.00251	MAPK3	protein_coding
ENSG00000105767.2	0.00440095	0.00121205	3.63101	0.000282315	0.00910732	1.00306	CADM4	protein_coding
ENSG00000105355.8	0.00353975	0.000974939	3.63074	0.000282607	0.00910732	1.00246	PLIN3	protein_coding
ENSG00000259717.1	0.0055482	0.00152861	3.62957	0.000283889	0.00913845	1.00385	LINC00677	lincRNA
ENSG00000148334.14	-0.0027624	0.000761363	-3.62823	0.000285369	0.00917587	0.998087	PTGES2	protein_coding
ENSG00000189159.15	0.00330362	0.00091097	3.62649	0.000287297	0.00921739	1.00229	JPT1	protein_coding
ENSG00000230797.2	-0.0026661	0.000735166	-3.62653	0.000287256	0.00921739	0.998154	YY2	protein_coding
ENSG00000101558.13	0.00286284	0.000789744	3.62502	0.000288937	0.0092294	1.00199	VAPA	protein_coding
ENSG00000162704.15	0.00338451	0.000933455	3.62579	0.000288076	0.0092294	1.00235	ARPC5	protein_coding
ENSG00000243951.1	-0.00177694	0.000490168	-3.62516	0.000288779	0.0092294	0.998769	RN7SL308P	misc_RNA
ENSG00000135318.11	-0.00601511	0.00165933	-3.62501	0.000288947	0.0092294	0.995839	NT5E	protein_coding
ENSG00000153560.11	-0.00202664	0.000559239	-3.62391	0.000290178	0.00925849	0.998596	UBP1	protein_coding
ENSG00000272799.1	0.00347104	0.00095854	3.62117	0.000293275	0.00927538	1.00241	AC006238.1	lincRNA
ENSG00000100577.18	-0.00213141	0.000588613	-3.62107	0.000293388	0.00927538	0.998524	GSTZ1	protein_coding
ENSG00000258215.1	0.00464115	0.00128165	3.62123	0.000293205	0.00927538	1.00322	AC078886.1	processed_pseudogene
ENSG00000134294.13	0.00399077	0.00110191	3.62168	0.000292695	0.00927538	1.00277	SLC38A2	protein_coding
ENSG00000152784.15	0.00304032	0.000839726	3.62061	0.000293912	0.00927538	1.00211	PRDM8	protein_coding
ENSG00000011376.10	-0.00185171	0.000511425	-3.6207	0.000293812	0.00927538	0.998717	LARS2	protein_coding
ENSG00000164603.11	0.00408884	0.0011291	3.62132	0.000293106	0.00927538	1.00284	BMT2	protein_coding
ENSG00000179632.9	-0.00520602	0.00143723	-3.62225	0.000292052	0.00927538	0.996398	MAF1	protein_coding
ENSG00000103091.14	-0.00165643	0.000457383	-3.62153	0.000292863	0.00927538	0.998853	WDR59	protein_coding
ENSG00000197442.9	0.00274645	0.000758486	3.62096	0.000293514	0.00927538	1.00191	MAP3K5	protein_coding
ENSG00000273192.1	-0.00301259	0.000832231	-3.61989	0.000294726	0.00929092	0.997914	AL671710.1	lincRNA
ENSG00000075420.12	0.00317133	0.00087662	3.61768	0.00029726	0.00936062	1.0022	FNDC3B	protein_coding
ENSG00000272990.1	-0.00408529	0.00112955	-3.61673	0.000298347	0.00938464	0.997172	AC084036.1	antisense
ENSG00000101265.15	0.00351299	0.000971531	3.61593	0.00029927	0.00939089	1.00244	RASSF2	protein_coding
ENSG00000276026.1	-0.00362285	0.00100197	-3.61572	0.000299519	0.00939089	0.997492	AL031665.2	antisense
ENSG00000100031.18	0.00359744	0.000994843	3.61609	0.000299084	0.00939089	1.0025	GGT1	protein_coding
ENSG00000259431.5	-0.00271776	0.000751842	-3.6148	0.000300579	0.00940375	0.998118	THTPA	protein_coding
ENSG00000107902.13	-0.00323662	0.000895331	-3.615	0.000300351	0.00940375	0.997759	LHPP	protein_coding
ENSG00000188554.13	0.00239155	0.000661905	3.61313	0.000302526	0.00943879	1.00166	NBR1	protein_coding
ENSG00000135372.8	-0.00225098	0.000623024	-3.613	0.000302678	0.00943879	0.998441	NAT10	protein_coding
ENSG00000122224.17	-0.00285745	0.000790774	-3.61348	0.000302113	0.00943879	0.998021	LY9	protein_coding
ENSG00000211886.1	-0.0042441	0.00117493	-3.61221	0.0003036	0.00944448	0.997063	TRAJ3	TR_J_gene
ENSG00000116903.7	0.00315366	0.000873105	3.612	0.00030384	0.00944448	1.00219	EXOC8	protein_coding
ENSG00000283050.1	0.0032038	0.00088695	3.61216	0.000303658	0.00944448	1.00222	GTF2IP12	transcribed_unprocessed_pseudogene
ENSG00000101972.18	0.004655	0.00128904	3.61123	0.000304752	0.00946268	1.00323	STAG2	protein_coding
ENSG00000189007.15	-0.00203059	0.000562381	-3.61071	0.000305363	0.00947148	0.998593	ADAT2	protein_coding
ENSG00000273454.1	-0.0021621	0.000599208	-3.60827	0.000308244	0.00955061	0.998502	AC112503.2	lincRNA
ENSG00000132768.13	-0.00258759	0.000717591	-3.60595	0.000311017	0.00962624	0.998208	DPH2	protein_coding
ENSG00000276649.1	0.00425553	0.00118059	3.60457	0.000312674	0.00966716	1.00295	AL117335.1	antisense
ENSG00000225163.4	-0.00308244	0.000855661	-3.60241	0.000315286	0.00973752	0.997866	LINC00618	sense_overlapping
ENSG00000143337.18	0.00230281	0.000639307	3.60204	0.000315731	0.00974088	1.0016	TOR1AIP1	protein_coding
ENSG00000168126.3	0.00738667	0.00205126	3.60103	0.000316958	0.00976831	1.00513	OR2W6P	unprocessed_pseudogene
ENSG00000279342.2	-0.00266382	0.000740059	-3.59947	0.000318861	0.00981651	0.998155	AP000866.6	sense_intronic
ENSG00000223922.1	-0.00221376	0.000615146	-3.59875	0.000319756	0.0098336	0.998467	ASS1P2	processed_pseudogene
ENSG00000163694.14	0.00390158	0.00108428	3.59831	0.000320289	0.00983953	1.00271	RBM47	protein_coding
ENSG00000227373.5	-0.00138617	0.000385281	-3.5978	0.000320915	0.00984832	0.99904	AL121983.2	lincRNA
ENSG00000142405.21	0.00406367	0.00112983	3.59672	0.000322251	0.00987883	1.00282	NLRP12	protein_coding
ENSG00000259600.2	0.00598877	0.00166559	3.59559	0.000323655	0.00991137	1.00416	AC066616.2	processed_pseudogene
ENSG00000212930.3	0.00332661	0.000925423	3.59469	0.00032478	0.00993532	1.00231	AC093281.1	lincRNA
ENSG00000247271.6	-0.00235581	0.000655518	-3.59381	0.000325877	0.00995835	0.998368	ZBED5-AS1	antisense
ENSG00000110934.10	0.00230599	0.000641927	3.59229	0.000327782	0.010006	1.0016	BIN2	protein_coding
ENSG00000173727.12	0.00279483	0.000778297	3.59096	0.000329458	0.010036	1.00194	AP000769.1	transcribed_unprocessed_pseudogene
ENSG00000150961.14	0.00197091	0.000548847	3.591	0.000329416	0.010036	1.00137	SEC24D	protein_coding
ENSG00000259321.1	0.00300553	0.000837315	3.58949	0.000331329	0.0100483	1.00209	AL136295.2	lincRNA
ENSG00000160194.17	-0.00138849	0.000386797	-3.5897	0.000331056	0.0100483	0.999038	NDUFV3	protein_coding
ENSG00000197208.5	0.00459759	0.00128102	3.58901	0.000331942	0.0100483	1.00319	SLC22A4	protein_coding
ENSG00000251149.1	-0.00666526	0.00185661	-3.59003	0.000330645	0.0100483	0.995391	MTND5P5	processed_pseudogene
ENSG00000266126.1	0.00198443	0.00055292	3.589	0.000331944	0.0100483	1.00138	AC005730.3	sense_intronic
ENSG00000107077.18	-0.00222774	0.000620561	-3.58988	0.000330834	0.0100483	0.998457	KDM4C	protein_coding
ENSG00000231841.1	0.00481462	0.00134219	3.58713	0.000334343	0.0100521	1.00334	FAM192BP	processed_pseudogene
ENSG00000244687.11	-0.00242963	0.00067722	-3.58765	0.000333674	0.0100521	0.998317	UBE2V1	protein_coding
ENSG00000170325.14	0.00167225	0.00046612	3.5876	0.000333734	0.0100521	1.00116	PRDM10	protein_coding
ENSG00000171940.13	0.00253633	0.000706952	3.58771	0.000333601	0.0100521	1.00176	ZNF217	protein_coding
ENSG00000144909.7	0.002929	0.000816424	3.5876	0.000333738	0.0100521	1.00203	OSBPL11	protein_coding
ENSG00000164035.9	0.0037584	0.00104778	3.587	0.000334501	0.0100521	1.00261	EMCN	protein_coding
ENSG00000198363.17	0.00387225	0.00107943	3.58731	0.00033411	0.0100521	1.00269	ASPH	protein_coding
ENSG00000239523.5	-0.00183452	0.000511675	-3.58533	0.000336651	0.0101062	0.998729	MYLK-AS1	antisense
ENSG00000215717.5	0.00336908	0.000940112	3.5837	0.000338766	0.0101591	1.00234	TMEM167B	protein_coding
ENSG00000272829.1	-0.00374048	0.00104414	-3.58237	0.000340494	0.0102004	0.997411	AC002470.1	lincRNA
ENSG00000164330.16	-0.00573368	0.00160091	-3.58151	0.000341612	0.0102233	0.996034	EBF1	protein_coding
ENSG00000122085.16	-0.0024053	0.00067166	-3.58112	0.000342122	0.010228	0.998334	MTERF4	protein_coding
ENSG00000260565.6	-0.00224206	0.000626176	-3.58056	0.000342863	0.0102395	0.998447	ERVK13-1	processed_transcript
ENSG00000100461.17	0.00258747	0.000722705	3.58026	0.000343259	0.0102408	1.0018	RBM23	protein_coding
ENSG00000283597.2	0.00494914	0.0013827	3.57932	0.000344491	0.0102577	1.00344	FAM169B	protein_coding
ENSG00000109743.10	0.00376003	0.0010505	3.57929	0.000344534	0.0102577	1.00261	BST1	protein_coding
ENSG00000237076.1	0.00276452	0.000772806	3.57725	0.000347228	0.0103273	1.00192	AL035706.1	lincRNA
ENSG00000103047.7	-0.0017275	0.000482965	-3.57685	0.000347757	0.0103324	0.998803	TANGO6	protein_coding
ENSG00000148926.9	0.00582046	0.00162811	3.57498	0.000350248	0.0103957	1.00404	ADM	protein_coding
ENSG00000268001.1	0.00347336	0.000971836	3.57401	0.000351551	0.0104028	1.00241	CARD8-AS1	antisense
ENSG00000140403.12	-0.00546749	0.00152963	-3.57438	0.000351052	0.0104028	0.996217	DNAJA4	protein_coding
ENSG00000197852.10	0.00419951	0.00117501	3.574	0.000351564	0.0104028	1.00292	INKA2	protein_coding
ENSG00000278259.4	-0.00197491	0.000552691	-3.57327	0.000352557	0.0104215	0.998632	MYO19	protein_coding
ENSG00000115165.9	0.0026952	0.000754423	3.57253	0.000353556	0.0104404	1.00187	CYTIP	protein_coding
ENSG00000228794.8	-0.00235545	0.000659785	-3.57003	0.00035694	0.0105296	0.998369	LINC01128	processed_transcript
ENSG00000132570.14	-0.00140245	0.000392997	-3.5686	0.000358893	0.0105764	0.999028	PCBD2	protein_coding
ENSG00000277463.1	0.00307047	0.000860713	3.56736	0.0003606	0.0106159	1.00213	AC080038.2	lincRNA
ENSG00000258379.1	0.00435773	0.00122204	3.56594	0.000362553	0.0106543	1.00303	AL355097.1	lincRNA
ENSG00000206448.3	-0.0041287	0.00115784	-3.56588	0.000362642	0.0106543	0.997142	PPIAP30	processed_pseudogene
ENSG00000101220.17	-0.00363654	0.00102015	-3.56472	0.00036425	0.0106708	0.997483	C20orf27	protein_coding
ENSG00000117419.15	-0.00232747	0.000652926	-3.56467	0.000364311	0.0106708	0.998388	ERI3	protein_coding
ENSG00000132286.11	-0.00212168	0.000595145	-3.56498	0.000363883	0.0106708	0.99853	TIMM10B	protein_coding
ENSG00000169891.17	0.0041901	0.00117581	3.56358	0.000365828	0.0106936	1.00291	REPS2	protein_coding
ENSG00000148824.18	-0.00266465	0.00074771	-3.56375	0.000365594	0.0106936	0.998155	MTG1	protein_coding
ENSG00000130559.18	-0.00142651	0.000400618	-3.56077	0.000369769	0.0107979	0.999012	CAMSAP1	protein_coding
ENSG00000134152.10	0.00380623	0.00106974	3.5581	0.000373549	0.010892	1.00264	KATNBL1	protein_coding
ENSG00000233010.1	-0.00239395	0.000672843	-3.55796	0.000373742	0.010892	0.998342	RPEP4	processed_pseudogene
ENSG00000071564.14	-0.00394196	0.0011085	-3.55612	0.000376369	0.0109027	0.997271	TCF3	protein_coding
ENSG00000179119.14	0.00182325	0.000512686	3.55626	0.000376165	0.0109027	1.00126	SPTY2D1	protein_coding
ENSG00000133063.15	0.00412315	0.00115927	3.55668	0.000375567	0.0109027	1.00286	CHIT1	protein_coding
ENSG00000277371.1	0.00346718	0.000974876	3.55653	0.00037578	0.0109027	1.00241	RF00017	misc_RNA
ENSG00000116127.17	-0.00246368	0.000692777	-3.55624	0.000376202	0.0109027	0.998294	ALMS1	protein_coding
ENSG00000272037.1	0.00393407	0.001106	3.55701	0.000375101	0.0109027	1.00273	AP002907.1	antisense
ENSG00000132824.13	0.00218662	0.000615029	3.55531	0.00037753	0.0109253	1.00152	SERINC3	protein_coding
ENSG00000108984.14	0.00272186	0.000765745	3.55452	0.000378665	0.0109382	1.00189	MAP2K6	protein_coding
ENSG00000128536.15	-0.00349728	0.000983963	-3.55428	0.000379016	0.0109382	0.997579	CDHR3	protein_coding
ENSG00000015676.17	-0.0018775	0.000528247	-3.55422	0.000379108	0.0109382	0.998699	NUDCD3	protein_coding
ENSG00000132357.13	0.00325838	0.000917323	3.55205	0.000382237	0.0110175	1.00226	CARD6	protein_coding
ENSG00000107959.15	-0.0021581	0.000607618	-3.55174	0.00038269	0.0110196	0.998505	PITRM1	protein_coding
ENSG00000256712.1	-0.00336094	0.000946844	-3.54962	0.000385783	0.0110976	0.997673	AC134349.1	sense_intronic
ENSG00000250539.1	-0.00432935	0.00121976	-3.54935	0.00038619	0.0110983	0.997004	KRT8P33	processed_pseudogene
ENSG00000105851.10	0.00233923	0.000659343	3.54781	0.000388445	0.011152	1.00162	PIK3CG	protein_coding
ENSG00000266922.1	0.00231126	0.000651581	3.54715	0.000389416	0.0111688	1.0016	AC008543.3	sense_intronic
ENSG00000109133.12	0.00293456	0.000827632	3.54573	0.000391534	0.0112184	1.00204	TMEM33	protein_coding
ENSG00000178075.19	0.00518059	0.00146154	3.5446	0.000393202	0.0112551	1.0036	GRAMD1C	protein_coding
ENSG00000124177.14	-0.00216832	0.000612201	-3.54184	0.00039734	0.0113623	0.998498	CHD6	protein_coding
ENSG00000226904.1	0.00613142	0.0017317	3.5407	0.000399064	0.0114003	1.00426	AL353608.2	antisense
ENSG00000170832.12	0.00307788	0.000869558	3.53959	0.000400742	0.0114369	1.00214	USP32	protein_coding
ENSG00000269976.1	-0.00417477	0.00117978	-3.5386	0.000402252	0.0114687	0.99711	AC012065.3	lincRNA
ENSG00000154589.6	0.00595149	0.00168285	3.53655	0.000405392	0.0115469	1.00413	LY96	protein_coding
ENSG00000125304.9	0.00275811	0.000780631	3.53318	0.000410589	0.0116811	1.00191	TM9SF2	protein_coding
ENSG00000059691.11	-0.00168838	0.000477892	-3.53298	0.000410911	0.0116811	0.99883	GATB	protein_coding
ENSG00000197037.10	-0.00169501	0.000479824	-3.53257	0.000411547	0.0116877	0.998826	ZSCAN25	protein_coding
ENSG00000060069.16	0.00236644	0.000670017	3.53191	0.000412577	0.0117055	1.00164	CTDP1	protein_coding
ENSG00000146094.14	0.0044881	0.00127089	3.53147	0.000413253	0.0117132	1.00312	DOK3	protein_coding
ENSG00000189430.12	0.00445688	0.00126264	3.52982	0.000415843	0.0117635	1.00309	NCR1	protein_coding
ENSG00000269919.1	0.00381238	0.00108005	3.52983	0.000415822	0.0117635	1.00265	AL022067.1	sense_intronic
ENSG00000151553.14	0.00331559	0.00093975	3.52816	0.000418452	0.0118258	1.0023	FAM160B1	protein_coding
ENSG00000269303.1	0.00384504	0.00109005	3.52738	0.000419694	0.0118493	1.00267	AC020907.3	antisense
ENSG00000117597.17	-0.00197689	0.000560575	-3.52655	0.000421017	0.0118751	0.998631	UTP25	protein_coding
ENSG00000258565.1	0.00375129	0.0010641	3.52532	0.000422978	0.0119187	1.0026	BLZF2P	unprocessed_pseudogene
ENSG00000233560.2	-0.00265628	0.000753633	-3.52464	0.000424062	0.0119377	0.99816	KRT8P39	processed_pseudogene
ENSG00000272498.1	-0.00432449	0.00122722	-3.52382	0.000425381	0.0119515	0.997007	AC090948.2	antisense
ENSG00000143207.20	0.0031153	0.000884058	3.52386	0.000425311	0.0119515	1.00216	COP1	protein_coding
ENSG00000132434.9	-0.00177922	0.00050506	-3.52278	0.000427048	0.0119868	0.998768	LANCL2	protein_coding
ENSG00000122861.15	0.00682401	0.00193748	3.52211	0.000428134	0.0120056	1.00474	PLAU	protein_coding
ENSG00000113360.16	-0.00213974	0.000607742	-3.5208	0.000430244	0.0120531	0.998518	DROSHA	protein_coding
ENSG00000223547.9	0.00341447	0.00096989	3.52047	0.000430778	0.0120564	1.00237	ZNF844	protein_coding
ENSG00000249931.4	0.00629669	0.00178917	3.51934	0.000432628	0.0120965	1.00437	GOLGA8K	protein_coding
ENSG00000275287.5	0.00406879	0.00115709	3.51639	0.000437466	0.0121832	1.00282	RF00017	misc_RNA
ENSG00000105610.5	-0.00772561	0.00219682	-3.51673	0.000436898	0.0121832	0.994659	KLF1	protein_coding
ENSG00000211956.2	-0.00630492	0.00179303	-3.51635	0.000437525	0.0121832	0.995639	IGHV4-34	IG_V_gene
ENSG00000115520.8	0.00302131	0.000859265	3.51616	0.000437835	0.0121832	1.0021	COQ10B	protein_coding
ENSG00000084731.14	0.00388973	0.00110596	3.51706	0.000436352	0.0121832	1.0027	KIF3C	protein_coding
ENSG00000186792.16	-0.00450039	0.00128013	-3.51556	0.000438821	0.0121989	0.996885	HYAL3	protein_coding
ENSG00000021574.12	0.00278752	0.000793002	3.51515	0.000439514	0.0122064	1.00193	SPAST	protein_coding
ENSG00000101882.9	0.0012163	0.000346068	3.51461	0.000440395	0.0122192	1.00084	NKAP	protein_coding
ENSG00000134698.10	0.00308738	0.000878765	3.51332	0.000442546	0.0122553	1.00214	AGO4	protein_coding
ENSG00000110721.11	-0.0027341	0.000778196	-3.51338	0.000442441	0.0122553	0.998107	CHKA	protein_coding
ENSG00000166965.12	-0.00331899	0.000945055	-3.51196	0.000444816	0.0123064	0.997702	RCCD1	protein_coding
ENSG00000118217.5	0.00263221	0.000749758	3.51074	0.00044686	0.0123512	1.00183	ATF6	protein_coding
ENSG00000166261.10	-0.00198701	0.000566133	-3.50978	0.000448474	0.0123679	0.998624	ZNF202	protein_coding
ENSG00000124882.3	0.0045652	0.00130077	3.50962	0.000448746	0.0123679	1.00317	EREG	protein_coding
ENSG00000122862.4	0.00577816	0.00164633	3.50973	0.000448569	0.0123679	1.00401	SRGN	protein_coding
ENSG00000236021.1	0.00561425	0.00160014	3.50861	0.000450459	0.0123952	1.0039	AL359265.3	antisense
ENSG00000178814.16	0.00571525	0.00162896	3.50853	0.000450594	0.0123952	1.00397	OPLAH	protein_coding
ENSG00000168807.16	0.00193522	0.000551661	3.50798	0.000451519	0.0124088	1.00134	SNTB2	protein_coding
ENSG00000064932.15	0.00456938	0.00130277	3.50743	0.000452465	0.0124101	1.00317	SBNO2	protein_coding
ENSG00000236194.3	0.00330891	0.000943529	3.50695	0.00045328	0.0124101	1.0023	AC099811.1	sense_intronic
ENSG00000211882.1	-0.00369219	0.00105268	-3.50742	0.00045247	0.0124101	0.997444	TRAJ7	TR_J_gene
ENSG00000148841.16	0.00357204	0.00101853	3.50705	0.000453109	0.0124101	1.00248	ITPRIP	protein_coding
ENSG00000156313.13	0.00307011	0.0008757	3.5059	0.000455074	0.0124461	1.00213	RPGR	protein_coding
ENSG00000181754.6	-0.0034344	0.00097974	-3.50542	0.000455884	0.0124461	0.997622	AMIGO1	protein_coding
ENSG00000136319.11	-0.00185624	0.000529507	-3.50561	0.000455565	0.0124461	0.998714	TTC5	protein_coding
ENSG00000135049.15	0.00339613	0.000969649	3.50243	0.000461027	0.0125746	1.00236	AGTPBP1	protein_coding
ENSG00000150995.19	-0.00237754	0.00067892	-3.50194	0.000461877	0.0125859	0.998353	ITPR1	protein_coding
ENSG00000160593.18	0.00323782	0.000925265	3.49934	0.000466408	0.0126855	1.00225	JAML	protein_coding
ENSG00000251411.1	-0.00487768	0.00139386	-3.4994	0.000466315	0.0126855	0.996625	AC093827.3	processed_pseudogene
ENSG00000092036.18	0.00420208	0.00120136	3.49776	0.00046919	0.0127492	1.00292	HAUS4	protein_coding
ENSG00000224157.1	0.00591827	0.00169228	3.49723	0.000470122	0.0127606	1.00411	HCG14	antisense
ENSG00000154928.17	0.00412614	0.0011799	3.49702	0.000470491	0.0127606	1.00286	EPHB1	protein_coding
ENSG00000119640.8	-0.00263522	0.000753801	-3.49591	0.000472451	0.0127667	0.998175	ACYP1	protein_coding
ENSG00000243417.1	0.00368737	0.00105477	3.49589	0.000472481	0.0127667	1.00256	AC023424.2	processed_pseudogene
ENSG00000145332.13	0.00296296	0.000847505	3.4961	0.000472109	0.0127667	1.00206	KLHL8	protein_coding
ENSG00000087253.12	0.00391395	0.00111937	3.49657	0.000471281	0.0127667	1.00272	LPCAT2	protein_coding
ENSG00000011143.16	-0.00196717	0.000562873	-3.49487	0.000474286	0.0128035	0.998637	MKS1	protein_coding
ENSG00000185947.14	0.00446961	0.00127942	3.49347	0.000476785	0.0128354	1.0031	ZNF267	protein_coding
ENSG00000239998.5	0.00383869	0.00109872	3.4938	0.000476197	0.0128354	1.00266	LILRA2	protein_coding
ENSG00000112406.4	0.00263399	0.000753978	3.49346	0.000476798	0.0128354	1.00183	HECA	protein_coding
ENSG00000058091.16	0.00425753	0.001219	3.49264	0.000478271	0.0128631	1.00296	CDK14	protein_coding
ENSG00000180353.10	0.00305182	0.00087385	3.49238	0.000478741	0.0128638	1.00212	HCLS1	protein_coding
ENSG00000166411.13	-0.00187615	0.000537254	-3.49211	0.000479223	0.0128648	0.9987	IDH3A	protein_coding
ENSG00000130021.13	-0.00197674	0.0005661	-3.49185	0.000479681	0.0128651	0.998631	PUDP	protein_coding
ENSG00000261596.2	0.00333573	0.000955608	3.49069	0.000481778	0.0128727	1.00231	AC005632.2	sense_intronic
ENSG00000109756.9	0.00307192	0.000880091	3.49046	0.000482186	0.0128727	1.00213	RAPGEF2	protein_coding
ENSG00000165271.16	-0.00294696	0.000844197	-3.49084	0.000481503	0.0128727	0.997959	NOL6	protein_coding
ENSG00000136273.12	-0.0017919	0.000513293	-3.49099	0.000481229	0.0128727	0.998759	HUS1	protein_coding
ENSG00000087157.18	0.00363635	0.00104155	3.49129	0.000480695	0.0128727	1.00252	PGS1	protein_coding
ENSG00000228293.1	0.00290457	0.000832317	3.48975	0.000483478	0.0128953	1.00202	AL049712.1	antisense
ENSG00000143622.10	0.0032939	0.000944071	3.48903	0.00048477	0.0129085	1.00229	RIT1	protein_coding
ENSG00000144029.11	-0.000896436	0.000256934	-3.48898	0.000484867	0.0129085	0.999379	MRPS5	protein_coding
ENSG00000065243.19	0.00395095	0.00113256	3.48852	0.000485711	0.0129191	1.00274	PKN2	protein_coding
ENSG00000198874.12	-0.00197598	0.000566577	-3.48758	0.000487406	0.0129523	0.998631	TYW1	protein_coding
ENSG00000167207.13	0.00482205	0.00138283	3.48709	0.000488315	0.0129646	1.00335	NOD2	protein_coding
ENSG00000117899.10	-0.00158029	0.000453274	-3.48638	0.000489607	0.012975	0.998905	MESD	protein_coding
ENSG00000269891.2	0.00875842	0.00251208	3.48653	0.000489336	0.012975	1.00609	ARHGAP19-SLIT1	protein_coding
ENSG00000208028.1	0.00332493	0.000953926	3.48552	0.000491174	0.0130047	1.00231	MIR616	miRNA
ENSG00000083223.17	0.00322422	0.000925206	3.48487	0.000492375	0.0130245	1.00224	TUT7	protein_coding
ENSG00000126945.8	0.00430189	0.0012347	3.48416	0.000493681	0.0130472	1.00299	HNRNPH2	protein_coding
ENSG00000184675.10	-0.00212566	0.000610137	-3.48391	0.00049415	0.0130474	0.998528	AMER1	protein_coding
ENSG00000258810.1	0.00608882	0.00174794	3.48342	0.000495042	0.0130474	1.00423	AL133371.2	antisense
ENSG00000123609.10	0.00393087	0.00112844	3.48344	0.000495014	0.0130474	1.00273	NMI	protein_coding
ENSG00000211455.7	0.00365245	0.00104919	3.48121	0.000499159	0.013132	1.00253	STK38L	protein_coding
ENSG00000120029.12	-0.00193873	0.000556906	-3.48125	0.000499087	0.013132	0.998657	ARMH3	protein_coding
ENSG00000165813.19	0.0034737	0.000998235	3.47984	0.000501717	0.0131873	1.00241	CCDC186	protein_coding
ENSG00000162396.5	-0.00302005	0.000868167	-3.47865	0.00050394	0.0132247	0.997909	PARS2	protein_coding
ENSG00000218730.1	-0.00671115	0.00192927	-3.47859	0.000504054	0.0132247	0.995359	AL117342.1	processed_pseudogene
ENSG00000204177.10	-0.00271889	0.000781732	-3.47804	0.000505099	0.0132401	0.998117	BMS1P1	transcribed_unprocessed_pseudogene
ENSG00000265972.5	0.00290607	0.00083565	3.47762	0.000505888	0.0132488	1.00202	TXNIP	protein_coding
ENSG00000100418.7	-0.00220357	0.000633777	-3.47689	0.00050727	0.013273	0.998474	DESI1	protein_coding
ENSG00000103707.9	0.00158525	0.000456024	3.47625	0.000508479	0.0132926	1.0011	MTFMT	protein_coding
ENSG00000136161.12	0.00288868	0.000831062	3.47589	0.000509163	0.0132984	1.002	RCBTB2	protein_coding
ENSG00000101266.18	-0.000967993	0.000278655	-3.47381	0.000513131	0.01339	0.999329	CSNK2A1	protein_coding
ENSG00000102967.11	-0.00198295	0.000570947	-3.47308	0.000514518	0.0134115	0.998626	DHODH	protein_coding
ENSG00000117139.17	0.00173516	0.000499629	3.47289	0.000514881	0.0134115	1.0012	KDM5B	protein_coding
ENSG00000255112.2	0.0033163	0.000955169	3.47196	0.000516681	0.0134406	1.0023	CHMP1B	protein_coding
ENSG00000183309.11	-0.00143082	0.000412123	-3.47183	0.00051693	0.0134406	0.999009	ZNF623	protein_coding
ENSG00000166734.19	0.00333718	0.000961569	3.47056	0.000519371	0.013492	1.00232	CASC4	protein_coding
ENSG00000163220.10	0.0058717	0.00169226	3.46974	0.000520957	0.0135211	1.00408	S100A9	protein_coding
ENSG00000102043.15	-0.00249701	0.000720034	-3.46791	0.000524524	0.0136014	0.998271	MTMR8	protein_coding
ENSG00000228506.1	-0.00279706	0.000806739	-3.46712	0.000526072	0.0136179	0.998063	AL513550.1	antisense
ENSG00000118491.9	-0.00378182	0.00109083	-3.46694	0.000526426	0.0136179	0.997382	ZC2HC1B	protein_coding
ENSG00000159885.13	0.0037938	0.0010943	3.46686	0.000526572	0.0136179	1.00263	ZNF222	protein_coding
ENSG00000006327.13	0.00385859	0.00111346	3.46539	0.000529454	0.013668	1.00268	TNFRSF12A	protein_coding
ENSG00000204701.2	0.00383963	0.00110798	3.46542	0.000529404	0.013668	1.00266	OR2J3	protein_coding
ENSG00000225062.1	0.00574912	0.00165926	3.46487	0.000530479	0.0136823	1.00399	CATIP-AS1	processed_transcript
ENSG00000108061.11	0.003899	0.00112556	3.46405	0.000532109	0.0137121	1.00271	SHOC2	protein_coding
ENSG00000135686.12	-0.00193552	0.000558932	-3.46289	0.000534406	0.0137591	0.998659	KLHL36	protein_coding
ENSG00000184787.18	-0.00196481	0.00056747	-3.4624	0.000535375	0.0137717	0.998639	UBE2G2	protein_coding
ENSG00000230839.1	0.00509286	0.00147109	3.46195	0.000536274	0.0137826	1.00354	AL121760.1	lincRNA
ENSG00000013306.15	-0.00718837	0.00207763	-3.45988	0.000540409	0.013852	0.99503	SLC25A39	protein_coding
ENSG00000136026.13	0.00386897	0.00111822	3.45993	0.000540307	0.013852	1.00269	CKAP4	protein_coding
ENSG00000165275.9	-0.00151927	0.00043909	-3.46005	0.000540081	0.013852	0.998947	TRMT10B	protein_coding
ENSG00000240549.2	0.00362654	0.00104827	3.45956	0.000541068	0.0138566	1.00252	THOC7-AS1	antisense
ENSG00000182389.19	0.0046808	0.00135359	3.45807	0.000544062	0.013915	1.00325	CACNB4	protein_coding
ENSG00000279821.1	0.00433827	0.00125458	3.45795	0.000544308	0.013915	1.00301	AC145098.2	TEC
ENSG00000207633.3	-0.00314373	0.000909284	-3.45737	0.000545471	0.0139324	0.997823	MIR505	miRNA
ENSG00000277161.1	-0.0022982	0.000665932	-3.4511	0.000558307	0.014207	0.998408	PIGW	protein_coding
ENSG00000101150.17	0.00304403	0.000881995	3.4513	0.00055789	0.014207	1.00211	TPD52L2	protein_coding
ENSG00000133703.11	0.00269705	0.000781598	3.45068	0.000559169	0.014207	1.00187	KRAS	protein_coding
ENSG00000270012.1	-0.0024003	0.000695416	-3.4516	0.000557265	0.014207	0.998338	AC232271.1	lincRNA
ENSG00000168769.13	0.00293675	0.000851045	3.45076	0.000559016	0.014207	1.00204	TET2	protein_coding
ENSG00000172243.17	0.00374151	0.00108407	3.45137	0.000557758	0.014207	1.0026	CLEC7A	protein_coding
ENSG00000100865.14	0.00148633	0.000430777	3.45035	0.000559859	0.0142121	1.00103	CINP	protein_coding
ENSG00000197381.15	-0.00308379	0.000893957	-3.44959	0.000561433	0.0142271	0.997865	ADARB1	protein_coding
ENSG00000275158.1	-0.00824572	0.00239029	-3.44967	0.000561274	0.0142271	0.994301	TRBV12-5	TR_V_gene
ENSG00000243845.3	-0.00419724	0.00121689	-3.44916	0.000562343	0.0142377	0.997095	RN7SL30P	misc_RNA
ENSG00000260495.1	-0.001915	0.000555271	-3.44876	0.000563157	0.0142458	0.998674	AC009148.1	antisense
ENSG00000113369.8	0.00498461	0.00144666	3.44561	0.000569771	0.0144005	1.00346	ARRDC3	protein_coding
ENSG00000027001.9	-0.00215818	0.000626607	-3.44423	0.000572698	0.0144367	0.998505	MIPEP	protein_coding
ENSG00000077684.15	0.00198074	0.000575056	3.44442	0.000572278	0.0144367	1.00137	JADE1	protein_coding
ENSG00000163283.6	0.0091841	0.00266627	3.44455	0.000572009	0.0144367	1.00639	ALPP	protein_coding
ENSG00000152684.10	0.00303731	0.000882233	3.44276	0.00057582	0.0145027	1.00211	PELO	protein_coding
ENSG00000108799.12	0.00204539	0.000594237	3.44204	0.000577341	0.0145284	1.00142	EZH1	protein_coding
ENSG00000114030.12	0.00205946	0.000598557	3.4407	0.000580206	0.0145878	1.00143	KPNA1	protein_coding
ENSG00000264017.2	0.00168082	0.000488726	3.43919	0.000583453	0.0146513	1.00117	RN7SL336P	misc_RNA
ENSG00000112242.14	0.00255789	0.000743776	3.43906	0.000583744	0.0146513	1.00177	E2F3	protein_coding
ENSG00000140750.16	-0.00326887	0.000950638	-3.4386	0.000584721	0.0146631	0.997737	ARHGAP17	protein_coding
ENSG00000144791.9	-0.00196181	0.000570595	-3.43819	0.000585625	0.0146731	0.998641	LIMD1	protein_coding
ENSG00000118900.14	0.00427842	0.00124463	3.4375	0.000587101	0.0146971	1.00297	UBN1	protein_coding
ENSG00000252652.1	-0.00272281	0.000792142	-3.43727	0.0005876	0.0146971	0.998114	RF00019	misc_RNA
ENSG00000146021.14	-0.0028014	0.000815171	-3.43658	0.000589104	0.014722	0.99806	KLHL3	protein_coding
ENSG00000183597.15	-0.00460869	0.00134139	-3.43575	0.000590914	0.0147545	0.996811	TANGO2	protein_coding
ENSG00000267174.5	0.00684083	0.00199181	3.43447	0.000593708	0.0147987	1.00475	AC011472.2	3prime_overlapping_ncRNA
ENSG00000116962.14	-0.00521385	0.00151809	-3.43448	0.000593684	0.0147987	0.996393	NID1	protein_coding
ENSG00000110400.10	0.00456613	0.00133008	3.43296	0.000597021	0.0148465	1.00317	NECTIN1	protein_coding
ENSG00000196668.3	0.00380858	0.00110932	3.43327	0.000596351	0.0148465	1.00264	LINC00173	processed_transcript
ENSG00000278831.1	-0.00362966	0.00105732	-3.4329	0.000597164	0.0148465	0.997487	AL513190.1	antisense
ENSG00000135655.15	0.00411486	0.00119914	3.43152	0.000600206	0.0149093	1.00286	USP15	protein_coding
ENSG00000130300.8	-0.00790175	0.00230307	-3.43096	0.000601439	0.0149143	0.994538	PLVAP	protein_coding
ENSG00000165879.8	0.00380041	0.00110767	3.43098	0.000601396	0.0149143	1.00264	FRAT1	protein_coding
ENSG00000205643.10	-0.00262822	0.000766136	-3.43048	0.000602516	0.0149283	0.99818	CDPF1	protein_coding
ENSG00000153250.19	0.00232959	0.000679169	3.43005	0.000603464	0.0149373	1.00162	RBMS1	protein_coding
ENSG00000273486.1	-0.00154599	0.000450746	-3.42985	0.000603914	0.0149373	0.998929	AC096992.2	antisense
ENSG00000165288.10	0.00249347	0.000727221	3.42877	0.000606334	0.0149532	1.00173	BRWD3	protein_coding
ENSG00000123815.11	0.00201218	0.000586755	3.42933	0.000605076	0.0149532	1.0014	COQ8B	protein_coding
ENSG00000214331.8	-0.00233304	0.000680458	-3.42864	0.000606624	0.0149532	0.998384	AC009053.1	transcribed_unprocessed_pseudogene
ENSG00000174574.15	0.00241271	0.00070365	3.42884	0.000606159	0.0149532	1.00167	AKIRIN1	protein_coding
ENSG00000112159.11	-0.00270288	0.000788449	-3.4281	0.000607825	0.0149701	0.998128	MDN1	protein_coding
ENSG00000214517.9	-0.00132581	0.000386788	-3.42775	0.000608612	0.0149767	0.999081	PPME1	protein_coding
ENSG00000171552.12	-0.00685305	0.00200153	-3.4239	0.000617287	0.0151773	0.995261	BCL2L1	protein_coding
ENSG00000115170.13	-0.00216629	0.000632961	-3.42247	0.00062054	0.0152443	0.9985	ACVR1	protein_coding
ENSG00000235159.1	-0.00331616	0.000969276	-3.42128	0.000623272	0.0152855	0.997704	AL121672.2	lincRNA
ENSG00000259626.2	0.00580549	0.00169679	3.42144	0.000622895	0.0152855	1.00403	MTND3P12	processed_pseudogene
ENSG00000063854.12	-0.00632473	0.00184929	-3.42009	0.000626007	0.0153214	0.995626	HAGH	protein_coding
ENSG00000133116.7	0.00604919	0.00176859	3.42035	0.000625397	0.0153214	1.0042	KL	protein_coding
ENSG00000109220.10	0.00279045	0.000815989	3.41972	0.000626853	0.0153214	1.00194	CHIC2	protein_coding
ENSG00000267519.6	0.00379014	0.00110826	3.41991	0.000626409	0.0153214	1.00263	AC020916.1	antisense
ENSG00000163933.9	-0.00161223	0.000471816	-3.41707	0.000632992	0.0154453	0.998883	RFT1	protein_coding
ENSG00000164327.12	0.0036507	0.00106833	3.4172	0.000632696	0.0154453	1.00253	RICTOR	protein_coding
ENSG00000157322.17	0.00620425	0.00181593	3.41657	0.000634147	0.0154605	1.00431	CLEC18A	protein_coding
ENSG00000161682.14	0.00614754	0.0017995	3.41624	0.000634915	0.0154662	1.00427	FAM171A2	protein_coding
ENSG00000121104.7	-0.00478081	0.0013998	-3.41536	0.000636971	0.0155032	0.996692	FAM117A	protein_coding
ENSG00000272719.1	0.00503217	0.0014736	3.41488	0.00063809	0.0155042	1.00349	AC006483.2	antisense
ENSG00000048140.17	-0.00260351	0.000762425	-3.41478	0.000638337	0.0155042	0.998197	TSPAN17	protein_coding
ENSG00000081059.19	-0.00430096	0.00125956	-3.41466	0.000638619	0.0155042	0.997023	TCF7	protein_coding
ENSG00000233746.1	0.00648121	0.00189873	3.41345	0.000641458	0.015547	1.0045	LINC00656	lincRNA
ENSG00000125810.9	0.00464818	0.00136169	3.41354	0.000641238	0.015547	1.00323	CD93	protein_coding
ENSG00000186517.13	0.00262482	0.000769065	3.41301	0.000642504	0.0155594	1.00182	ARHGAP30	protein_coding
ENSG00000170852.10	0.00276909	0.000811443	3.41255	0.000643578	0.0155723	1.00192	KBTBD2	protein_coding
ENSG00000102100.15	0.00217607	0.000637889	3.41137	0.000646371	0.0156268	1.00151	SLC35A2	protein_coding
ENSG00000104763.18	0.0033484	0.000981731	3.41071	0.000647938	0.0156517	1.00232	ASAH1	protein_coding
ENSG00000174885.12	0.00481778	0.00141278	3.41014	0.000649284	0.0156711	1.00335	NLRP6	protein_coding
ENSG00000162819.11	0.00280925	0.00082401	3.40924	0.000651437	0.0157099	1.00195	BROX	protein_coding
ENSG00000259767.1	-0.00243772	0.00071518	-3.40855	0.000653096	0.0157368	0.998312	AC022558.1	sense_intronic
ENSG00000239827.8	-0.0025433	0.000746235	-3.40817	0.000653991	0.0157453	0.998239	SUGT1P3	transcribed_unprocessed_pseudogene
ENSG00000171223.5	0.00364423	0.00106949	3.40743	0.000655774	0.015762	1.00253	JUNB	protein_coding
ENSG00000180979.9	0.00124958	0.000366709	3.40754	0.000655501	0.015762	1.00087	LRRC57	protein_coding
ENSG00000091039.16	0.00491786	0.00144423	3.40519	0.000661183	0.0158788	1.00341	OSBPL8	protein_coding
ENSG00000188404.8	0.00382516	0.00112409	3.40291	0.000666721	0.0159853	1.00265	SELL	protein_coding
ENSG00000226266.6	0.00164492	0.00048337	3.40302	0.000666459	0.0159853	1.00114	AC009961.1	lincRNA
ENSG00000115042.9	-0.00196826	0.000578613	-3.4017	0.000669691	0.0160432	0.998637	FAHD2A	protein_coding
ENSG00000255332.7	-0.00447402	0.00131547	-3.40109	0.000671182	0.0160656	0.996904	AP003028.1	lincRNA
ENSG00000246225.6	-0.00352164	0.00103567	-3.40034	0.000673012	0.0160916	0.997562	AC006299.1	antisense
ENSG00000249437.7	0.00462749	0.00136095	3.40019	0.00067338	0.0160916	1.00321	NAIP	protein_coding
ENSG00000119682.16	0.00250581	0.000737903	3.39586	0.000684142	0.0163141	1.00174	AREL1	protein_coding
ENSG00000187475.5	0.00464709	0.0013685	3.39576	0.00068438	0.0163141	1.00323	HIST1H1T	protein_coding
ENSG00000135749.18	-0.00250246	0.000736916	-3.39586	0.00068414	0.0163141	0.998267	PCNX2	protein_coding
ENSG00000134830.5	0.00349815	0.00103047	3.39471	0.000687014	0.0163634	1.00243	C5AR2	protein_coding
ENSG00000182134.15	-0.00235334	0.000693346	-3.39418	0.000688336	0.0163814	0.99837	TDRKH	protein_coding
ENSG00000225889.7	0.00377726	0.00111302	3.39372	0.000689513	0.0163959	1.00262	AC012368.1	antisense
ENSG00000083828.15	0.0022269	0.000656247	3.39339	0.000690339	0.0164021	1.00154	ZNF586	protein_coding
ENSG00000172845.14	0.00367256	0.00108243	3.39288	0.000691618	0.016419	1.00255	SP3	protein_coding
ENSG00000114541.14	0.0022657	0.000667883	3.39236	0.00069293	0.0164335	1.00157	FRMD4B	protein_coding
ENSG00000236810.5	-0.00148721	0.000438421	-3.39219	0.000693364	0.0164335	0.99897	ELOA-AS1	antisense
ENSG00000105974.11	0.0106408	0.00313775	3.39123	0.0006958	0.0164777	1.0074	CAV1	protein_coding
ENSG00000067992.13	0.00246272	0.00072629	3.39082	0.000696842	0.0164889	1.00171	PDK3	protein_coding
ENSG00000143374.16	-0.00161847	0.000477424	-3.39002	0.000698887	0.0165238	0.998879	TARS2	protein_coding
ENSG00000001167.14	0.00191913	0.000566328	3.38872	0.000702195	0.0165884	1.00133	NFYA	protein_coding
ENSG00000197081.13	0.00453053	0.00133717	3.38814	0.000703676	0.0166098	1.00315	IGF2R	protein_coding
ENSG00000257704.3	0.00315729	0.000932015	3.38759	0.000705085	0.016616	1.00219	INAFM1	protein_coding
ENSG00000146776.14	-0.00217351	0.000641575	-3.38777	0.000704637	0.016616	0.998495	ATXN7L1	protein_coding
ENSG00000087589.16	0.00327499	0.000966935	3.38698	0.000706664	0.0166397	1.00227	CASS4	protein_coding
ENSG00000225300.1	-0.00275736	0.000814186	-3.38665	0.000707523	0.0166464	0.998091	AL591623.1	sense_intronic
ENSG00000124571.17	-0.00204783	0.000604861	-3.38562	0.000710183	0.0166954	0.998582	XPO5	protein_coding
ENSG00000079308.18	-0.00749431	0.00221436	-3.38441	0.000713303	0.0167436	0.994819	TNS1	protein_coding
ENSG00000021355.12	0.0032679	0.000965584	3.38438	0.000713394	0.0167436	1.00227	SERPINB1	protein_coding
ENSG00000270959.1	0.00216849	0.000641281	3.3815	0.000720918	0.0169065	1.0015	LPP-AS2	antisense
ENSG00000164406.7	-0.00121637	0.000360004	-3.37876	0.000728145	0.0170346	0.999157	LEAP2	protein_coding
ENSG00000259496.2	0.00707405	0.00209361	3.37888	0.000727826	0.0170346	1.00492	AC021818.2	processed_pseudogene
ENSG00000207626.1	-0.00372257	0.00110171	-3.3789	0.000727775	0.0170346	0.997423	MIR562	miRNA
ENSG00000176749.8	0.00412508	0.00122155	3.37693	0.000733002	0.0171344	1.00286	CDK5R1	protein_coding
ENSG00000131470.14	0.00162417	0.000481039	3.37637	0.000734487	0.0171427	1.00113	PSMC3IP	protein_coding
ENSG00000196411.9	0.00489991	0.00145124	3.37635	0.000734544	0.0171427	1.0034	EPHB4	protein_coding
ENSG00000058272.18	0.00329643	0.000976977	3.37412	0.000740529	0.017213	1.00229	PPP1R12A	protein_coding
ENSG00000285006.1	0.00457677	0.00135631	3.37444	0.000739669	0.017213	1.00318	AC005280.3	processed_transcript
ENSG00000154429.10	0.00311392	0.000922772	3.37453	0.00073942	0.017213	1.00216	CCSAP	protein_coding
ENSG00000273382.1	0.00308445	0.000914103	3.37429	0.000740062	0.017213	1.00214	AL356488.3	antisense
ENSG00000142453.11	-0.00583626	0.0017295	-3.37453	0.00073943	0.017213	0.995963	CARM1	protein_coding
ENSG00000206149.10	-0.00204394	0.000605859	-3.37362	0.000741877	0.0172305	0.998584	HERC2P9	transcribed_unprocessed_pseudogene
ENSG00000254783.1	-0.00140548	0.00041666	-3.37321	0.000742968	0.0172396	0.999026	AP003084.1	processed_pseudogene
ENSG00000198169.8	-0.00178095	0.000527996	-3.37303	0.00074346	0.0172396	0.998766	ZNF251	protein_coding
ENSG00000267040.6	-0.00228128	0.000676613	-3.37162	0.000747277	0.0173142	0.99842	AC027097.1	antisense
ENSG00000140199.11	0.00275458	0.0008171	3.37117	0.000748497	0.0173286	1.00191	SLC12A6	protein_coding
ENSG00000241634.1	-0.00463437	0.00137491	-3.37067	0.000749859	0.0173462	0.996793	AC069499.1	processed_pseudogene
ENSG00000158290.16	0.00312903	0.00092885	3.36871	0.000755213	0.0174422	1.00217	CUL4B	protein_coding
ENSG00000081320.10	0.00370601	0.00110009	3.36881	0.000754927	0.0174422	1.00257	STK17B	protein_coding
ENSG00000135334.8	0.00283364	0.000841325	3.36807	0.00075697	0.0174689	1.00197	AKIRIN2	protein_coding
ENSG00000258284.1	-0.00339874	0.00100943	-3.36697	0.000759977	0.0175243	0.997647	POLR2KP1	processed_pseudogene
ENSG00000185201.16	0.00806741	0.00239679	3.36592	0.00076288	0.0175772	1.00561	IFITM2	protein_coding
ENSG00000125375.14	-0.00152909	0.000454519	-3.3642	0.000767652	0.0176731	0.998941	ATP5S	protein_coding
ENSG00000263627.1	0.00517246	0.00153779	3.36358	0.000769392	0.0176991	1.00359	PPP4R1-AS1	lincRNA
ENSG00000110717.12	-0.00203807	0.000606029	-3.363	0.000771008	0.0177222	0.998588	NDUFS8	protein_coding
ENSG00000204054.13	0.00270795	0.000805467	3.36197	0.000773899	0.0177745	1.00188	LINC00963	processed_transcript
ENSG00000255730.5	0.00869405	0.00258698	3.36069	0.000777484	0.0178145	1.00604	AC011462.1	protein_coding
ENSG00000233327.10	0.00513909	0.00152918	3.36069	0.00077749	0.0178145	1.00357	USP32P2	transcribed_unprocessed_pseudogene
ENSG00000155307.18	0.00371613	0.00110564	3.36108	0.000776384	0.0178145	1.00258	SAMSN1	protein_coding
ENSG00000131263.12	0.00290039	0.000863175	3.36014	0.00077902	0.0178264	1.00201	RLIM	protein_coding
ENSG00000272672.1	-0.00243023	0.00072327	-3.36007	0.00077924	0.0178264	0.998317	AL391497.1	lincRNA
ENSG00000177646.18	-0.00202566	0.000602972	-3.35947	0.000780935	0.0178465	0.998597	ACAD9	protein_coding
ENSG00000171793.14	-0.00165195	0.000491809	-3.35892	0.000782476	0.0178465	0.998856	CTPS1	protein_coding
ENSG00000130347.12	-0.00250179	0.000744829	-3.35888	0.000782583	0.0178465	0.998267	RTN4IP1	protein_coding
ENSG00000151623.14	-0.00304006	0.000905024	-3.3591	0.000781979	0.0178465	0.997895	NR3C2	protein_coding
ENSG00000121060.17	0.00402198	0.00119757	3.35843	0.000783853	0.0178613	1.00279	TRIM25	protein_coding
ENSG00000163219.11	0.00253263	0.000754184	3.35811	0.000784775	0.0178683	1.00176	ARHGAP25	protein_coding
ENSG00000104892.16	-0.00685491	0.00204177	-3.35734	0.000786971	0.0178702	0.99526	KLC3	protein_coding
ENSG00000134909.18	-0.00245458	0.000731135	-3.35721	0.000787331	0.0178702	0.9983	ARHGAP32	protein_coding
ENSG00000113742.12	0.00319764	0.000952312	3.35777	0.000785743	0.0178702	1.00222	CPEB4	protein_coding
ENSG00000281969.1	0.00827927	0.00246607	3.35728	0.000787141	0.0178702	1.00576	AL592158.1	TEC
ENSG00000033050.8	-0.00166179	0.000495046	-3.35684	0.000788401	0.0178805	0.998849	ABCF2	protein_coding
ENSG00000271582.1	-0.0050697	0.00151066	-3.35595	0.000790926	0.0179237	0.996492	AC073111.2	processed_pseudogene
ENSG00000159199.13	-0.00229918	0.00068551	-3.35396	0.000796631	0.0180389	0.998408	ATP5MC1	protein_coding
ENSG00000271931.1	0.00755341	0.00225251	3.35334	0.000798429	0.0180514	1.00525	AL353135.1	antisense
ENSG00000250644.3	0.00443682	0.00132307	3.35343	0.000798158	0.0180514	1.00308	AC068580.4	protein_coding
ENSG00000137815.14	0.00176507	0.000526502	3.35245	0.000800994	0.0180952	1.00122	RTF1	protein_coding
ENSG00000113716.12	-0.00188171	0.000561427	-3.35166	0.000803278	0.0181327	0.998697	HMGXB3	protein_coding
ENSG00000136371.10	0.00288662	0.00086139	3.35112	0.000804868	0.0181544	1.002	MTHFS	protein_coding
ENSG00000234616.8	-0.00195105	0.000582305	-3.35056	0.000806483	0.0181766	0.998649	JRK	protein_coding
ENSG00000105447.12	-0.0019838	0.000592164	-3.35008	0.000807885	0.0181941	0.998626	GRWD1	protein_coding
ENSG00000131876.16	-0.00209723	0.000626285	-3.34868	0.000811972	0.0182719	0.998547	SNRPA1	protein_coding
ENSG00000197622.12	0.0022441	0.00067038	3.3475	0.000815452	0.0183342	1.00156	CDC42SE1	protein_coding
ENSG00000215190.9	-0.00186794	0.000558042	-3.34731	0.000816006	0.0183342	0.998706	LINC00680	transcribed_unprocessed_pseudogene
ENSG00000182541.17	0.00424181	0.00126754	3.3465	0.000818396	0.0183363	1.00294	LIMK2	protein_coding
ENSG00000124160.11	-0.00173505	0.000518394	-3.34698	0.000816966	0.0183363	0.998798	NCOA5	protein_coding
ENSG00000272669.1	0.00546886	0.00163422	3.34646	0.000818502	0.0183363	1.0038	AL021707.6	antisense
ENSG00000213462.4	0.00343882	0.00102761	3.34642	0.000818636	0.0183363	1.00239	ERV3-1	protein_coding
ENSG00000100483.13	0.002629	0.000785727	3.34595	0.00082001	0.0183529	1.00182	VCPKMT	protein_coding
ENSG00000100906.10	0.00289543	0.000865453	3.34556	0.000821157	0.0183643	1.00201	NFKBIA	protein_coding
ENSG00000243107.1	-0.0027392	0.000819094	-3.34419	0.000825242	0.0184415	0.998103	AC000120.1	sense_overlapping
ENSG00000005156.11	-0.00177091	0.000529597	-3.34388	0.000826148	0.0184475	0.998773	LIG3	protein_coding
ENSG00000221826.9	0.00554395	0.00165805	3.34366	0.000826822	0.0184483	1.00385	PSG3	protein_coding
ENSG00000278864.1	-0.00382667	0.00114462	-3.34318	0.000828234	0.0184655	0.997351	AC055811.4	TEC
ENSG00000229196.3	-0.00292053	0.000873711	-3.34267	0.000829772	0.0184856	0.997978	AC087071.1	antisense
ENSG00000230492.1	0.00400982	0.00119967	3.34243	0.000830478	0.0184871	1.00278	AL049651.1	antisense
ENSG00000151414.14	0.00387388	0.00115917	3.34192	0.000831996	0.0185066	1.00269	NEK7	protein_coding
ENSG00000122729.18	-0.00192129	0.000575087	-3.34086	0.000835185	0.0185206	0.998669	ACO1	protein_coding
ENSG00000043514.16	-0.00179814	0.000538167	-3.34123	0.000834068	0.0185206	0.998754	TRIT1	protein_coding
ENSG00000086288.11	0.00388671	0.0011633	3.3411	0.000834477	0.0185206	1.0027	NME8	protein_coding
ENSG00000234921.1	0.0042165	0.00126209	3.34089	0.000835089	0.0185206	1.00293	AC006450.2	antisense
ENSG00000184792.15	-0.00722595	0.00216338	-3.34013	0.000837398	0.0185555	0.995004	OSBP2	protein_coding
ENSG00000226985.6	0.00330615	0.000990203	3.33886	0.000841221	0.018589	1.00229	LINC01203	lincRNA
ENSG00000125844.15	0.00268887	0.000805362	3.33871	0.000841697	0.018589	1.00187	RRBP1	protein_coding
ENSG00000158825.5	0.0050608	0.00151559	3.33916	0.000840332	0.018589	1.00351	CDA	protein_coding
ENSG00000187736.12	-0.00173404	0.000519396	-3.33857	0.000842122	0.018589	0.998799	NHEJ1	protein_coding
ENSG00000233730.1	0.0066217	0.00198327	3.33878	0.000841486	0.018589	1.0046	LINC01765	lincRNA
ENSG00000265694.1	-0.00494704	0.00148243	-3.33712	0.000846528	0.018672	0.996577	MIR4774	miRNA
ENSG00000104450.12	0.00364005	0.00109122	3.33575	0.000850687	0.0187494	1.00253	SPAG1	protein_coding
ENSG00000169193.11	0.0045947	0.00137754	3.33545	0.000851626	0.0187559	1.00319	CCDC126	protein_coding
ENSG00000104381.12	-0.00268832	0.000806134	-3.33482	0.000853536	0.0187836	0.998138	GDAP1	protein_coding
ENSG00000105321.13	0.00239084	0.000716977	3.33461	0.000854195	0.0187839	1.00166	CCDC9	protein_coding
ENSG00000211643.2	-0.00482771	0.00144816	-3.33368	0.000857044	0.0188322	0.996659	IGLV5-52	IG_V_gene
ENSG00000258137.5	0.00333525	0.00100058	3.33332	0.000858161	0.0188424	1.00231	AC079313.2	antisense
ENSG00000122126.16	-0.00205805	0.000617541	-3.33265	0.000860238	0.0188451	0.998574	OCRL	protein_coding
ENSG00000109458.8	0.00284153	0.000852626	3.33268	0.000860147	0.0188451	1.00197	GAB1	protein_coding
ENSG00000285851.1	0.0032672	0.000980342	3.33272	0.000860014	0.0188451	1.00227	AL359762.3	processed_transcript
ENSG00000143753.12	0.00240111	0.000720554	3.33231	0.000861284	0.0188538	1.00167	DEGS1	protein_coding
ENSG00000237665.1	0.00687737	0.00206439	3.33143	0.000863996	0.0188988	1.00478	GRM7-AS2	antisense
ENSG00000144040.12	0.00233691	0.000701517	3.33122	0.000864676	0.0188994	1.00162	SFXN5	protein_coding
ENSG00000271964.1	-0.00440035	0.00132112	-3.33077	0.000866069	0.0189156	0.996955	AC090948.1	antisense
ENSG00000134198.9	0.00440453	0.00132255	3.33033	0.00086743	0.018924	1.00306	TSPAN2	protein_coding
ENSG00000204304.11	0.00310142	0.000931294	3.33022	0.000867761	0.018924	1.00215	PBX2	protein_coding
ENSG00000101452.14	-0.00162125	0.000486948	-3.32941	0.000870316	0.0189654	0.998877	DHX35	protein_coding
ENSG00000157856.11	0.00784719	0.00235966	3.32556	0.000882415	0.0191898	1.00545	DRC1	protein_coding
ENSG00000162490.6	0.00340324	0.0010235	3.32509	0.000883888	0.0191898	1.00236	DRAXIN	protein_coding
ENSG00000132128.16	-0.0014043	0.000422236	-3.32586	0.00088146	0.0191898	0.999027	LRRC41	protein_coding
ENSG00000111962.7	-0.00293476	0.000882585	-3.32519	0.000883598	0.0191898	0.997968	UST	protein_coding
ENSG00000279814.1	-0.00591139	0.00177782	-3.32508	0.000883929	0.0191898	0.995911	AC010997.5	TEC
ENSG00000140400.16	-0.00384606	0.00115683	-3.32466	0.000885269	0.0192045	0.997338	MAN2C1	protein_coding
ENSG00000261537.1	-0.00618654	0.0018617	-3.32306	0.000890363	0.0192861	0.995721	AC027279.2	sense_intronic
ENSG00000155659.14	0.00623251	0.00187552	3.32308	0.000890301	0.0192861	1.00433	VSIG4	protein_coding
ENSG00000135083.15	0.00459801	0.0013838	3.32275	0.000891356	0.0192932	1.00319	CCNJL	protein_coding
ENSG00000134755.15	0.00583868	0.00175745	3.32224	0.000892973	0.0193031	1.00406	DSC2	protein_coding
ENSG00000101460.12	0.00460258	0.00138541	3.32219	0.000893151	0.0193031	1.0032	MAP1LC3A	protein_coding
ENSG00000151743.10	0.00205046	0.000617243	3.32197	0.000893851	0.0193038	1.00142	AMN1	protein_coding
ENSG00000240663.3	0.00292378	0.000880716	3.31978	0.000900878	0.019355	1.00203	RN7SL310P	misc_RNA
ENSG00000141540.10	-0.00328912	0.000990504	-3.32065	0.000898082	0.019355	0.997723	TTYH2	protein_coding
ENSG00000132589.15	0.00408915	0.00123176	3.31977	0.000900901	0.019355	1.00284	FLOT2	protein_coding
ENSG00000142655.12	-0.00243081	0.00073216	-3.32006	0.000899979	0.019355	0.998317	PEX14	protein_coding
ENSG00000137462.7	0.00392818	0.00118297	3.32062	0.00089819	0.019355	1.00273	TLR2	protein_coding
ENSG00000126262.4	0.00435801	0.00131261	3.32012	0.000899798	0.019355	1.00303	FFAR2	protein_coding
ENSG00000119535.17	0.0043282	0.00130371	3.31992	0.000900437	0.019355	1.003	CSF3R	protein_coding
ENSG00000116406.18	0.00285584	0.000860441	3.31904	0.000903271	0.0193852	1.00198	EDEM3	protein_coding
ENSG00000228218.1	-0.00500717	0.00150867	-3.31892	0.000903648	0.0193852	0.996535	ATF4P3	processed_pseudogene
ENSG00000233382.6	-0.00209351	0.000630941	-3.31808	0.000906399	0.0194244	0.99855	NKAPP1	transcribed_processed_pseudogene
ENSG00000170848.15	0.0046374	0.00139802	3.31712	0.000909503	0.0194244	1.00322	PSG6	protein_coding
ENSG00000070269.13	0.00246162	0.000742055	3.3173	0.000908931	0.0194244	1.00171	TMEM260	protein_coding
ENSG00000249685.1	-0.00394597	0.00118931	-3.31788	0.000907048	0.0194244	0.997269	AC079921.2	lincRNA
ENSG00000197249.13	0.00418754	0.00126229	3.31741	0.000908551	0.0194244	1.00291	SERPINA1	protein_coding
ENSG00000136104.20	-0.00199455	0.000601259	-3.31729	0.00090896	0.0194244	0.998618	RNASEH2B	protein_coding
ENSG00000214629.3	-0.00360991	0.00108863	-3.316	0.000913162	0.0194882	0.997501	RPSAP6	processed_pseudogene
ENSG00000183283.15	0.00261036	0.000787394	3.31518	0.000915827	0.0195307	1.00181	DAZAP2	protein_coding
ENSG00000008086.11	0.00228572	0.000689729	3.31394	0.000919909	0.0195928	1.00159	CDKL5	protein_coding
ENSG00000161638.10	0.00314658	0.000949572	3.31368	0.00092077	0.0195928	1.00218	ITGA5	protein_coding
ENSG00000240966.3	0.00331349	0.000999888	3.31386	0.000920184	0.0195928	1.0023	RN7SL681P	misc_RNA
ENSG00000259488.2	0.00756258	0.00228245	3.31336	0.000921833	0.0195987	1.00526	AC023355.1	antisense
ENSG00000123810.7	0.00287111	0.000866571	3.31318	0.000922402	0.0195987	1.00199	B9D2	protein_coding
ENSG00000108474.16	-0.00183685	0.000554597	-3.31204	0.000926182	0.0196505	0.998728	PIGL	protein_coding
ENSG00000226756.1	0.00377903	0.001141	3.31203	0.000926202	0.0196505	1.00262	AC007365.1	lincRNA
ENSG00000114480.12	0.00275308	0.000831339	3.31162	0.000927572	0.0196652	1.00191	GBE1	protein_coding
ENSG00000139644.12	0.00236725	0.00071493	3.31117	0.000929084	0.0196828	1.00164	TMBIM6	protein_coding
ENSG00000103064.14	-0.00271211	0.000819191	-3.31072	0.000930554	0.0196996	0.998122	SLC7A6	protein_coding
ENSG00000142611.16	0.0100384	0.0030339	3.30875	0.00093712	0.0198241	1.00698	PRDM16	protein_coding
ENSG00000070770.8	-0.00161395	0.00048782	-3.30851	0.000937955	0.0198272	0.998882	CSNK2A2	protein_coding
ENSG00000277493.1	-0.00303042	0.000916523	-3.30643	0.000944945	0.0199076	0.997902	AC139769.3	unprocessed_pseudogene
ENSG00000259671.1	0.005594	0.00169188	3.30637	0.000945132	0.0199076	1.00388	MTCYBP23	processed_pseudogene
ENSG00000163513.17	0.00222779	0.000673663	3.30698	0.000943082	0.0199076	1.00155	TGFBR2	protein_coding
ENSG00000122642.10	0.00447492	0.00135343	3.30635	0.000945196	0.0199076	1.00311	FKBP9	protein_coding
ENSG00000214439.4	0.00322459	0.000975138	3.3068	0.000943668	0.0199076	1.00224	FAM185BP	transcribed_unprocessed_pseudogene
ENSG00000100365.14	0.00398273	0.00120516	3.30473	0.00095069	0.019942	1.00276	NCF4	protein_coding
ENSG00000224530.1	-0.00917886	0.00277747	-3.30475	0.000950611	0.019942	0.993658	PPIAP10	processed_pseudogene
ENSG00000168610.14	0.00338562	0.00102423	3.30551	0.000948035	0.019942	1.00235	STAT3	protein_coding
ENSG00000132405.18	0.00305617	0.00092481	3.30465	0.000950965	0.019942	1.00212	TBC1D14	protein_coding
ENSG00000269001.2	0.00412782	0.00124895	3.30503	0.000949651	0.019942	1.00287	AC092070.2	transcribed_unprocessed_pseudogene
ENSG00000107951.14	-0.00112931	0.000341725	-3.30474	0.000950659	0.019942	0.999218	MTPAP	protein_coding
ENSG00000147533.16	0.00261042	0.000790267	3.30321	0.000955856	0.0200301	1.00181	GOLGA7	protein_coding
ENSG00000214975.4	0.00653917	0.00197992	3.30275	0.000957402	0.0200479	1.00454	PPIAP29	processed_pseudogene
ENSG00000271699.5	-0.00367592	0.00111315	-3.30227	0.000959051	0.0200535	0.997455	SNX29P2	transcribed_unprocessed_pseudogene
ENSG00000261338.2	0.00181362	0.000549186	3.30239	0.000958656	0.0200535	1.00126	AC021016.2	sense_overlapping
ENSG00000202374.1	-0.00628887	0.00190617	-3.29922	0.00096954	0.0202544	0.99565	RF00091	snoRNA
ENSG00000214113.10	-0.00205268	0.0006222	-3.29907	0.000970059	0.0202544	0.998578	LYRM4	protein_coding
ENSG00000130023.15	-0.00198254	0.000601053	-3.29845	0.000972207	0.0202554	0.998627	ERMARD	protein_coding
ENSG00000138069.17	0.00262568	0.000796008	3.29856	0.000971835	0.0202554	1.00182	RAB1A	protein_coding
ENSG00000226479.3	0.00259469	0.000786596	3.29863	0.000971565	0.0202554	1.0018	TMEM185B	protein_coding
ENSG00000257594.3	0.00317731	0.00096348	3.29774	0.00097465	0.0202764	1.0022	GALNT4	protein_coding
ENSG00000075884.13	0.00289115	0.0008767	3.29777	0.000974573	0.0202764	1.00201	ARHGAP15	protein_coding
ENSG00000111897.6	0.00432164	0.00131056	3.29755	0.000975321	0.0202764	1.003	SERINC1	protein_coding
ENSG00000166579.15	0.00318511	0.000966088	3.29691	0.000977534	0.0203079	1.00221	NDEL1	protein_coding
ENSG00000175137.10	0.0026537	0.000805403	3.29487	0.000984665	0.0204413	1.00184	SH3BP5L	protein_coding
ENSG00000198911.11	-0.00368319	0.00111856	-3.29278	0.000992007	0.0205596	0.99745	SREBF2	protein_coding
ENSG00000227508.6	-0.0032707	0.000993257	-3.29291	0.000991572	0.0205596	0.997735	LINC01624	lincRNA
ENSG00000198431.15	0.00274937	0.000835014	3.29261	0.000992629	0.0205596	1.00191	TXNRD1	protein_coding
ENSG00000152926.14	0.00541588	0.00164494	3.29245	0.000993202	0.0205596	1.00376	ZNF117	protein_coding
ENSG00000077420.15	0.00302881	0.000920069	3.29194	0.000994981	0.0205817	1.0021	APBB1IP	protein_coding
ENSG00000161980.5	-0.00166715	0.000506634	-3.29064	0.000999588	0.0206622	0.998845	POLR3K	protein_coding
ENSG00000132199.19	-0.00287754	0.000874589	-3.29016	0.0010013	0.0206828	0.998007	ENOSF1	protein_coding
ENSG00000272071.1	-0.0027122	0.000824628	-3.28899	0.00100547	0.0207441	0.998122	AC122710.3	lincRNA
ENSG00000136068.14	-0.00301177	0.00091573	-3.28893	0.0010057	0.0207441	0.997915	FLNB	protein_coding
ENSG00000177410.12	0.00322983	0.000982274	3.28811	0.00100862	0.0207747	1.00224	ZFAS1	antisense
ENSG00000173757.9	0.00303951	0.000924375	3.28818	0.00100838	0.0207747	1.00211	STAT5B	protein_coding
ENSG00000240671.4	-0.00869626	0.00264507	-3.28772	0.00101003	0.020789	0.99399	IGKV1-8	IG_V_gene
ENSG00000162551.13	0.00649484	0.00197561	3.28752	0.00101076	0.0207891	1.00451	ALPL	protein_coding
ENSG00000117616.17	0.00273342	0.000831572	3.28705	0.00101242	0.0207975	1.0019	RSRP1	protein_coding
ENSG00000106628.10	-0.00266502	0.000810775	-3.287	0.0010126	0.0207975	0.998154	POLD2	protein_coding
ENSG00000204160.11	0.00380188	0.00115672	3.28678	0.00101339	0.020799	1.00264	ZDHHC18	protein_coding
ENSG00000153339.13	0.0024274	0.000738974	3.28482	0.00102046	0.0209292	1.00168	TRAPPC8	protein_coding
ENSG00000146909.7	-0.00142565	0.00043419	-3.28348	0.00102532	0.0210141	0.999012	NOM1	protein_coding
ENSG00000183784.7	0.00266232	0.000811063	3.28251	0.00102886	0.0210568	1.00185	C9orf66	protein_coding
ENSG00000224745.1	0.00435982	0.00132814	3.28266	0.00102833	0.0210568	1.00303	AC063965.1	sense_intronic
ENSG00000284428.1	-0.00206606	0.000629495	-3.28209	0.00103041	0.0210735	0.998569	IPO5P1	processed_transcript
ENSG00000275210.1	0.00418142	0.00127449	3.28085	0.00103495	0.0211365	1.0029	AC245884.11	processed_transcript
ENSG00000175471.19	0.00338326	0.00103116	3.28101	0.00103435	0.0211365	1.00235	MCTP1	protein_coding
ENSG00000227268.3	0.00290578	0.000885826	3.28031	0.00103694	0.0211621	1.00202	KLLN	protein_coding
ENSG00000211965.4	-0.00789844	0.00240895	-3.27878	0.00104255	0.0212618	0.99454	IGHV3-49	IG_V_gene
ENSG00000070731.10	0.00429648	0.00131084	3.27766	0.0010467	0.0213164	1.00298	ST6GALNAC2	protein_coding
ENSG00000189077.10	0.00308135	0.000940088	3.27772	0.00104647	0.0213164	1.00214	TMEM120A	protein_coding
ENSG00000119318.12	0.00225765	0.000688867	3.27734	0.00104789	0.0213255	1.00157	RAD23B	protein_coding
ENSG00000273247.5	0.00178679	0.000545318	3.2766	0.00105063	0.0213663	1.00124	AC097376.2	antisense
ENSG00000100099.20	-0.00143905	0.000439229	-3.27632	0.0010517	0.021373	0.999003	HPS4	protein_coding
ENSG00000256590.2	0.00953752	0.00291249	3.2747	0.00105775	0.0214809	1.00663	TRDV3	TR_V_gene
ENSG00000103313.12	0.00379385	0.00115877	3.27403	0.00106026	0.0215036	1.00263	MEFV	protein_coding
ENSG00000048471.13	-0.00235399	0.000718994	-3.274	0.00106036	0.0215036	0.99837	SNX29	protein_coding
ENSG00000221263.1	0.00475046	0.0014511	3.27371	0.00106146	0.021511	1.0033	MIR548P	miRNA
ENSG00000139842.14	-0.00236466	0.000722437	-3.27317	0.0010635	0.0215221	0.998362	CUL4A	protein_coding
ENSG00000083168.10	0.00203304	0.000621123	3.27317	0.00106349	0.0215221	1.00141	KAT6A	protein_coding
ENSG00000081913.13	0.00239272	0.00073128	3.27196	0.00106804	0.0215839	1.00166	PHLPP1	protein_coding
ENSG00000112299.7	0.00595191	0.00181898	3.27212	0.00106746	0.0215839	1.00413	VNN1	protein_coding
ENSG00000130592.15	0.00373032	0.00114027	3.27144	0.00107	0.0216082	1.00259	LSP1	protein_coding
ENSG00000105647.16	-0.00468031	0.00143095	-3.27077	0.00107253	0.0216444	0.996761	PIK3R2	protein_coding
ENSG00000229955.1	0.00268194	0.00082015	3.27006	0.00107525	0.0216841	1.00186	Z98749.1	sense_intronic
ENSG00000143157.11	-0.00147826	0.000452194	-3.26908	0.00107897	0.0217439	0.998976	POGK	protein_coding
ENSG00000138796.16	-0.00170364	0.000521242	-3.26843	0.00108147	0.0217554	0.99882	HADH	protein_coding
ENSG00000088812.17	-0.00162715	0.000497853	-3.26834	0.00108179	0.0217554	0.998873	ATRN	protein_coding
ENSG00000075340.22	-0.00285606	0.000873842	-3.2684	0.00108159	0.0217554	0.998022	ADD2	protein_coding
ENSG00000274307.1	-0.00357626	0.00109436	-3.26791	0.00108346	0.0217738	0.997524	AC023449.2	sense_intronic
ENSG00000102554.13	0.00379452	0.00116137	3.26727	0.0010859	0.0217926	1.00263	KLF5	protein_coding
ENSG00000088876.11	-0.00163939	0.000501746	-3.26737	0.00108553	0.0217926	0.998864	ZNF343	protein_coding
ENSG00000160551.11	0.00194954	0.000596742	3.26697	0.00108707	0.0218009	1.00135	TAOK1	protein_coding
ENSG00000230124.7	-0.00155826	0.000477135	-3.26586	0.00109132	0.0218558	0.99892	ACBD6	protein_coding
ENSG00000197872.11	0.0026757	0.000819283	3.2659	0.00109118	0.0218558	1.00186	FAM49A	protein_coding
ENSG00000219712.1	-0.00367911	0.00112706	-3.26434	0.0010972	0.0219584	0.997453	AL357054.1	processed_pseudogene
ENSG00000159247.13	0.0110887	0.00339723	3.26405	0.00109831	0.0219654	1.00772	TUBBP5	transcribed_unprocessed_pseudogene
ENSG00000013583.9	-0.00533882	0.00163606	-3.26323	0.00110151	0.0220032	0.996306	HEBP1	protein_coding
ENSG00000115758.12	-0.00519867	0.00159313	-3.26317	0.00110172	0.0220032	0.996403	ODC1	protein_coding
ENSG00000274308.1	-0.00313048	0.000959788	-3.26164	0.00110769	0.0221073	0.997832	AC244093.1	processed_pseudogene
ENSG00000228452.1	0.00257042	0.000788195	3.26114	0.00110964	0.0221309	1.00178	AC098484.1	antisense
ENSG00000115761.15	-0.00164725	0.000505159	-3.26084	0.00111081	0.0221389	0.998859	NOL10	protein_coding
ENSG00000132394.10	-0.00242477	0.000744051	-3.25888	0.00111854	0.0222776	0.998321	EEFSEC	protein_coding
ENSG00000123146.19	0.00379125	0.00116362	3.25814	0.00112145	0.0223203	1.00263	ADGRE5	protein_coding
ENSG00000022277.12	0.00279094	0.000856807	3.25737	0.00112451	0.022359	1.00194	RTF2	protein_coding
ENSG00000179046.8	0.00257873	0.000791688	3.25726	0.00112494	0.022359	1.00179	TRIML2	protein_coding
ENSG00000218809.1	0.00437595	0.00134395	3.25603	0.0011298	0.0224402	1.00304	AL391903.1	unprocessed_pseudogene
ENSG00000235051.3	0.00329618	0.00101255	3.25531	0.00113269	0.0224822	1.00229	AL357497.1	antisense
ENSG00000270179.1	-0.00415172	0.00127564	-3.25462	0.00113545	0.0225214	0.997126	AP002840.2	sense_intronic
ENSG00000078747.14	0.0021557	0.00066241	3.25433	0.00113661	0.0225291	1.0015	ITCH	protein_coding
ENSG00000260859.1	0.00674423	0.00207271	3.25383	0.00113861	0.0225532	1.00469	AC025280.1	sense_intronic
ENSG00000182957.15	0.00214646	0.000659727	3.25356	0.00113968	0.022559	1.00149	SPATA13	protein_coding
ENSG00000111837.11	0.00484777	0.00149029	3.2529	0.00114234	0.0225962	1.00337	MAK	protein_coding
ENSG00000204389.9	0.00449863	0.00138317	3.2524	0.00114433	0.0226046	1.00312	HSPA1A	protein_coding
ENSG00000133961.20	0.00306936	0.000943706	3.25245	0.00114414	0.0226046	1.00213	NUMB	protein_coding
ENSG00000234432.4	0.00401149	0.00123354	3.25202	0.00114588	0.0226199	1.00278	AC092171.3	lincRNA
ENSG00000189060.5	-0.00739983	0.00227591	-3.25137	0.00114851	0.0226562	0.994884	H1F0	protein_coding
ENSG00000152443.12	0.00251876	0.000774804	3.25084	0.00115066	0.0226833	1.00175	ZNF776	protein_coding
ENSG00000236550.1	-0.00370034	0.00113839	-3.25052	0.00115196	0.0226934	0.997438	AL109809.3	unprocessed_pseudogene
ENSG00000260868.1	0.00606503	0.00186617	3.24998	0.00115412	0.0227205	1.00421	LINC01960	lincRNA
ENSG00000102897.9	0.0020137	0.000619682	3.24958	0.00115577	0.0227375	1.0014	LYRM1	protein_coding
ENSG00000116198.12	-0.0020822	0.000640798	-3.24938	0.00115657	0.0227378	0.998558	CEP104	protein_coding
ENSG00000260086.2	0.00439299	0.00135243	3.24822	0.00116129	0.0227925	1.00305	AC007611.1	lincRNA
ENSG00000163412.12	0.00307942	0.000948064	3.24812	0.00116172	0.0227925	1.00214	EIF4E3	protein_coding
ENSG00000114573.9	0.00298589	0.000919261	3.24814	0.00116161	0.0227925	1.00207	ATP6V1A	protein_coding
ENSG00000215769.8	0.00271833	0.000837612	3.24533	0.00117316	0.0228761	1.00189	ARHGAP27P1-BPTFP1-KPNA2P3	processed_transcript
ENSG00000103227.18	-0.00277399	0.000854629	-3.24584	0.00117104	0.0228761	0.998079	LMF1	protein_coding
ENSG00000252614.1	0.00306508	0.000944286	3.24593	0.00117069	0.0228761	1.00213	RNU6-807P	snRNA
ENSG00000137817.16	-0.00168063	0.000517679	-3.24646	0.00116848	0.0228761	0.998836	PARP6	protein_coding
ENSG00000126858.17	0.00315463	0.000972114	3.24513	0.00117398	0.0228761	1.00219	RHOT1	protein_coding
ENSG00000087338.4	0.00260964	0.000803958	3.24599	0.00117045	0.0228761	1.00181	GMCL1	protein_coding
ENSG00000283491.1	-0.00428709	0.00132104	-3.24523	0.00117357	0.0228761	0.997033	AC017104.5	unprocessed_pseudogene
ENSG00000253210.1	0.00389814	0.00120129	3.24496	0.00117467	0.0228761	1.00271	AC040970.1	antisense
ENSG00000137274.12	-0.00175572	0.000540775	-3.24667	0.00116763	0.0228761	0.998784	BPHL	protein_coding
ENSG00000138867.16	-0.00527518	0.00162477	-3.24673	0.00116739	0.0228761	0.99635	GUCD1	protein_coding
ENSG00000151327.12	0.00160843	0.000495605	3.24539	0.00117292	0.0228761	1.00112	FAM177A1	protein_coding
ENSG00000087074.7	0.00354654	0.00109307	3.24457	0.00117629	0.0228922	1.00246	PPP1R15A	protein_coding
ENSG00000166128.12	0.00408381	0.00125879	3.24423	0.00117769	0.022904	1.00283	RAB8B	protein_coding
ENSG00000279356.1	-0.00196021	0.000604359	-3.24345	0.00118092	0.0229425	0.998642	AC007610.4	TEC
ENSG00000229452.1	0.00642289	0.00198031	3.24337	0.00118125	0.0229425	1.00446	AC005162.1	antisense
ENSG00000223949.6	0.00354534	0.00109344	3.24239	0.00118532	0.0229877	1.00246	ROR1-AS1	antisense
ENSG00000177830.17	-0.00253721	0.000782643	-3.24185	0.00118755	0.0229877	0.998243	CHID1	protein_coding
ENSG00000095794.19	0.00215645	0.000665164	3.24199	0.00118699	0.0229877	1.0015	CREM	protein_coding
ENSG00000249156.2	0.0071257	0.00219777	3.24224	0.00118593	0.0229877	1.00495	TAF11L12	protein_coding
ENSG00000232533.1	0.00307516	0.000948483	3.24219	0.00118615	0.0229877	1.00213	AC093673.1	antisense
ENSG00000265118.5	0.00523503	0.00161543	3.24065	0.00119259	0.0230697	1.00364	AC134669.1	protein_coding
ENSG00000120594.16	0.0031096	0.000959726	3.24009	0.00119491	0.0230991	1.00216	PLXDC2	protein_coding
ENSG00000129680.15	-0.00170775	0.000527159	-3.23953	0.00119725	0.023129	0.998817	MAP7D3	protein_coding
ENSG00000273112.1	0.00615852	0.00190123	3.23923	0.00119854	0.0231384	1.00428	AL590385.2	processed_transcript
ENSG00000141084.10	-0.00513261	0.00158495	-3.23834	0.00120228	0.0231798	0.996449	RANBP10	protein_coding
ENSG00000255723.1	0.00386758	0.00119425	3.23851	0.00120155	0.0231798	1.00268	AC108516.2	processed_transcript
ENSG00000272563.1	0.00375576	0.00115989	3.23804	0.00120352	0.0231883	1.00261	AC016745.2	lincRNA
ENSG00000254812.1	0.00200505	0.000619291	3.23766	0.00120515	0.0232042	1.00139	AC067930.3	antisense
ENSG00000160445.10	-0.00520918	0.00160905	-3.23742	0.00120614	0.0232078	0.996396	ZER1	protein_coding
ENSG00000241886.1	0.00428964	0.00132526	3.23683	0.00120865	0.0232407	1.00298	AC112496.1	sense_intronic
ENSG00000149292.16	-0.00269227	0.000832315	-3.23468	0.00121781	0.0234009	0.998136	TTC12	protein_coding
ENSG00000117859.18	0.00174693	0.000540096	3.23449	0.0012186	0.0234009	1.00121	OSBPL9	protein_coding
ENSG00000132823.10	0.00303103	0.000937472	3.23319	0.00122415	0.0234212	1.0021	OSER1	protein_coding
ENSG00000137845.14	0.00272357	0.000842398	3.23311	0.00122449	0.0234212	1.00189	ADAM10	protein_coding
ENSG00000148925.10	0.00269585	0.000833598	3.23399	0.00122075	0.0234212	1.00187	BTBD10	protein_coding
ENSG00000144741.17	-0.00191408	0.00059192	-3.23368	0.00122207	0.0234212	0.998674	SLC25A26	protein_coding
ENSG00000204569.9	0.00230151	0.000711849	3.23314	0.00122436	0.0234212	1.0016	PPP1R10	protein_coding
ENSG00000233072.1	0.00275486	0.000852079	3.23311	0.00122452	0.0234212	1.00191	RPS15AP6	processed_pseudogene
ENSG00000100439.10	0.00285301	0.000882769	3.23188	0.00122977	0.0234789	1.00198	ABHD4	protein_coding
ENSG00000204397.7	0.0044174	0.00136684	3.23184	0.00122997	0.0234789	1.00307	CARD16	protein_coding
ENSG00000142409.5	0.00264358	0.000817936	3.23201	0.00122922	0.0234789	1.00183	ZNF787	protein_coding
ENSG00000085433.15	0.00202981	0.00062818	3.23126	0.00123246	0.0235111	1.00141	WDR47	protein_coding
ENSG00000283384.1	0.00603724	0.00186892	3.23034	0.00123644	0.0235713	1.00419	AL138694.1	lincRNA
ENSG00000231233.1	0.00566343	0.00175342	3.22993	0.0012382	0.0235749	1.00393	CFAP58-DT	antisense
ENSG00000270001.1	-0.00322245	0.000997688	-3.22992	0.00123825	0.0235749	0.997769	AL121894.2	lincRNA
ENSG00000123933.16	-0.00271019	0.000839558	-3.22812	0.00124606	0.023708	0.998123	MXD4	protein_coding
ENSG00000011028.13	-0.00668952	0.00207346	-3.22626	0.00125417	0.0238466	0.995374	MRC2	protein_coding
ENSG00000128918.14	0.00572366	0.0017749	3.22478	0.0012607	0.023955	1.00398	ALDH1A2	protein_coding
ENSG00000273907.1	0.00759503	0.00235661	3.22286	0.00126919	0.0241005	1.00528	CA15P2	unprocessed_pseudogene
ENSG00000123836.14	0.00334027	0.0010365	3.22263	0.00127019	0.0241036	1.00232	PFKFB2	protein_coding
ENSG00000130159.13	-0.00346583	0.00107587	-3.22142	0.00127555	0.0241811	0.997601	ECSIT	protein_coding
ENSG00000126883.16	0.00210215	0.000652572	3.22134	0.00127594	0.0241811	1.00146	NUP214	protein_coding
ENSG00000204228.3	-0.00312766	0.000971154	-3.22056	0.0012794	0.0242308	0.997834	HSD17B8	protein_coding
ENSG00000213341.10	0.00319111	0.000990949	3.22026	0.00128074	0.0242403	1.00221	CHUK	protein_coding
ENSG00000163605.14	0.0043744	0.0013585	3.22003	0.00128178	0.0242442	1.00304	PPP4R2	protein_coding
ENSG00000259962.1	0.00515446	0.00160086	3.21982	0.00128272	0.0242461	1.00358	AC007342.2	unprocessed_pseudogene
ENSG00000243101.1	-0.0056494	0.00175559	-3.21795	0.00129111	0.0243887	0.996092	RPS3P7	processed_pseudogene
ENSG00000100580.7	0.00199491	0.000620039	3.2174	0.00129359	0.0244196	1.00138	TMED8	protein_coding
ENSG00000006740.16	0.0077837	0.00241957	3.21698	0.00129549	0.0244395	1.00541	ARHGAP44	protein_coding
ENSG00000207042.1	0.00436355	0.00135667	3.21636	0.00129827	0.0244761	1.00303	RNU6-196P	snRNA
ENSG00000130414.11	-0.00152585	0.000474562	-3.21529	0.00130312	0.0245455	0.998943	NDUFA10	protein_coding
ENSG00000237135.1	0.00515117	0.00160214	3.21517	0.00130365	0.0245455	1.00358	DDX10P1	processed_pseudogene
ENSG00000198223.16	0.0029884	0.00092986	3.21382	0.00130983	0.0246457	1.00207	CSF2RA	protein_coding
ENSG00000260596.5	0.00998606	0.00310845	3.21255	0.00131563	0.0247389	1.00695	DUX4	protein_coding
ENSG00000129071.9	0.00243407	0.000757742	3.21227	0.00131691	0.0247467	1.00169	MBD4	protein_coding
ENSG00000112561.17	0.00275663	0.000858357	3.21152	0.00132033	0.024795	1.00191	TFEB	protein_coding
ENSG00000261529.1	-0.00264251	0.000822931	-3.21109	0.0013223	0.0248159	0.99817	AC100774.1	sense_intronic
ENSG00000239948.2	0.00448708	0.00139778	3.21015	0.00132668	0.0248819	1.00312	RN7SL368P	misc_RNA
ENSG00000176853.15	0.00278068	0.000866305	3.20982	0.0013282	0.0248943	1.00193	FAM91A1	protein_coding
ENSG00000170921.15	0.00244798	0.000762723	3.20952	0.00132955	0.0249034	1.0017	TANC2	protein_coding
ENSG00000259418.1	0.00518936	0.00161713	3.20899	0.00133201	0.0249334	1.0036	AC091117.2	antisense
ENSG00000109586.11	0.00223467	0.000696417	3.20881	0.00133287	0.0249334	1.00155	GALNT7	protein_coding
ENSG00000148680.15	-0.00278438	0.000867852	-3.20836	0.00133494	0.0249559	0.998072	HTR7	protein_coding
ENSG00000285882.1	0.00289401	0.00090213	3.20797	0.00133675	0.0249737	1.00201	AC093516.1	sense_intronic
ENSG00000054392.12	-0.003071	0.000957367	-3.20775	0.00133776	0.0249765	0.997874	HHAT	protein_coding
ENSG00000262180.1	-0.00215364	0.000671593	-3.20676	0.00134237	0.0250463	0.998508	OCLM	protein_coding
ENSG00000239265.5	0.00732341	0.00228555	3.20422	0.00135429	0.0252357	1.00509	CLRN1-AS1	antisense
ENSG00000112294.12	-0.00413582	0.00129073	-3.20425	0.00135417	0.0252357	0.997137	ALDH5A1	protein_coding
ENSG00000204149.10	-0.00271127	0.000846203	-3.20404	0.00135514	0.0252357	0.998122	AGAP6	protein_coding
ENSG00000073331.17	0.00345437	0.00107852	3.20288	0.00136058	0.0253209	1.0024	ALPK1	protein_coding
ENSG00000002016.17	-0.00191063	0.000596594	-3.20256	0.00136212	0.0253332	0.998677	RAD52	protein_coding
ENSG00000259651.2	0.0051878	0.00162012	3.20211	0.00136425	0.0253402	1.0036	MTCO3P23	processed_pseudogene
ENSG00000177272.8	-0.00288635	0.00090137	-3.20219	0.00136388	0.0253402	0.998001	KCNA3	protein_coding
ENSG00000282133.1	-0.00390726	0.00122036	-3.20174	0.00136601	0.0253404	0.997295	TRBJ1-3	TR_J_gene
ENSG00000129204.16	0.00306204	0.000956317	3.20191	0.00136522	0.0253404	1.00212	USP6	protein_coding
ENSG00000183018.8	0.00539218	0.00168469	3.20069	0.00137099	0.0254165	1.00374	SPNS2	protein_coding
ENSG00000171467.15	-0.00223551	0.000698496	-3.20046	0.00137209	0.0254205	0.998452	ZNF318	protein_coding
ENSG00000100697.14	0.00241723	0.000755499	3.19951	0.0013766	0.025475	1.00168	DICER1	protein_coding
ENSG00000176868.2	-0.0038851	0.0012143	-3.19947	0.00137679	0.025475	0.997311	AL358781.1	antisense
ENSG00000173212.4	0.00569	0.00177867	3.19902	0.00137893	0.0254959	1.00395	MAB21L3	protein_coding
ENSG00000156170.12	-0.00140175	0.000438201	-3.19887	0.00137968	0.0254959	0.999029	NDUFAF6	protein_coding
ENSG00000162194.12	-0.00236588	0.000739955	-3.19733	0.00138706	0.0255688	0.998361	LBHD1	protein_coding
ENSG00000131389.17	0.00342759	0.00107208	3.19714	0.00138798	0.0255688	1.00238	SLC6A6	protein_coding
ENSG00000162367.11	-0.00541214	0.00169256	-3.1976	0.00138576	0.0255688	0.996256	TAL1	protein_coding
ENSG00000131323.14	-0.0020116	0.000629189	-3.19713	0.00138804	0.0255688	0.998607	TRAF3	protein_coding
ENSG00000232680.2	0.00522189	0.0016332	3.19734	0.001387	0.0255688	1.00363	AC002511.1	lincRNA
ENSG00000280190.1	-0.00552552	0.00172901	-3.19577	0.00139458	0.0256728	0.996177	AC027279.4	TEC
ENSG00000206053.12	-0.00166818	0.000522108	-3.19508	0.0013979	0.0257013	0.998844	JPT2	protein_coding
ENSG00000228106.5	-0.00249722	0.000781571	-3.19512	0.00139772	0.0257013	0.998271	AL392172.1	lincRNA
ENSG00000238005.2	0.00443107	0.00138729	3.19405	0.0014029	0.0257605	1.00308	AL391832.2	lincRNA
ENSG00000221783.1	-0.00361745	0.00113249	-3.19423	0.00140204	0.0257605	0.997496	MIR1183	miRNA
ENSG00000280027.1	0.00585415	0.00183329	3.19325	0.00140682	0.0258057	1.00407	AC007342.9	TEC
ENSG00000236670.1	-0.00286624	0.000897613	-3.19318	0.00140715	0.0258057	0.998015	KRT18P5	processed_pseudogene
ENSG00000271741.1	-0.00246896	0.000773401	-3.19235	0.00141121	0.0258638	0.99829	AC114490.2	protein_coding
ENSG00000112531.16	0.00311564	0.000976226	3.19152	0.00141529	0.0259221	1.00216	QKI	protein_coding
ENSG00000160216.18	-0.0025182	0.000789114	-3.19117	0.00141696	0.0259365	0.998256	AGPAT3	protein_coding
ENSG00000068654.15	-0.00196446	0.000615762	-3.19029	0.00142129	0.0259991	0.998639	POLR1A	protein_coding
ENSG00000164649.19	-0.00359824	0.00112797	-3.19001	0.00142267	0.026008	0.997509	CDCA7L	protein_coding
ENSG00000136197.12	0.00304586	0.00095525	3.18855	0.00142987	0.0261231	1.00211	C7orf25	protein_coding
ENSG00000167995.15	0.00376238	0.00118014	3.18808	0.00143221	0.0261303	1.00261	BEST1	protein_coding
ENSG00000181631.6	0.00383346	0.00120237	3.18826	0.00143131	0.0261303	1.00266	P2RY13	protein_coding
ENSG00000123983.13	0.00230889	0.000724321	3.18766	0.00143431	0.0261303	1.0016	ACSL3	protein_coding
ENSG00000006459.10	0.0024883	0.000780588	3.18772	0.00143398	0.0261303	1.00173	KDM7A	protein_coding
ENSG00000260633.1	0.00351802	0.00110367	3.18756	0.00143478	0.0261303	1.00244	AC010207.1	lincRNA
ENSG00000237261.2	0.00354132	0.00111114	3.18711	0.00143703	0.0261548	1.00246	RF00017	misc_RNA
ENSG00000114268.11	0.00362027	0.00113619	3.18632	0.00144096	0.026181	1.00251	PFKFB4	protein_coding
ENSG00000116266.10	0.00321411	0.00100882	3.18602	0.00144245	0.026181	1.00223	STXBP3	protein_coding
ENSG00000231047.1	0.00391031	0.00122723	3.18629	0.00144112	0.026181	1.00271	GCNT1P3	processed_pseudogene
ENSG00000114982.17	-0.00226178	0.000709931	-3.18591	0.00144299	0.026181	0.998433	KANSL3	protein_coding
ENSG00000255398.2	0.00513826	0.00161262	3.18627	0.00144119	0.026181	1.00357	HCAR3	protein_coding
ENSG00000231181.1	-0.00458065	0.00143789	-3.18567	0.00144421	0.0261866	0.99683	AL954705.1	processed_pseudogene
ENSG00000159445.12	-0.00255079	0.00080076	-3.18546	0.00144526	0.0261893	0.998233	THEM4	protein_coding
ENSG00000230918.1	-0.00437073	0.00137219	-3.18521	0.00144648	0.0261951	0.996975	AC008063.1	antisense
ENSG00000279594.1	-0.00265972	0.00083516	-3.18468	0.00144914	0.0262269	0.998158	AL049780.3	TEC
ENSG00000212246.1	0.00317643	0.000997491	3.18442	0.00145044	0.026234	1.0022	RNU6-360P	snRNA
ENSG00000147535.16	-0.00332518	0.00104437	-3.1839	0.00145303	0.0262644	0.997698	PLPP5	protein_coding
ENSG00000232310.7	0.00395992	0.00124384	3.18362	0.00145444	0.0262735	1.00275	AL078590.3	lincRNA
ENSG00000269902.1	-0.00300474	0.000943889	-3.18336	0.00145575	0.0262808	0.997919	AC234772.2	lincRNA
ENSG00000057935.13	-0.00194198	0.000610266	-3.18218	0.00146169	0.0263551	0.998655	MTA3	protein_coding
ENSG00000163171.7	0.00284625	0.000894397	3.18231	0.00146105	0.0263551	1.00197	CDC42EP3	protein_coding
ENSG00000154930.14	-0.00189069	0.000594424	-3.1807	0.00146918	0.0264571	0.99869	ACSS1	protein_coding
ENSG00000197013.9	0.00305847	0.000961541	3.1808	0.00146871	0.0264571	1.00212	ZNF429	protein_coding
ENSG00000104375.16	0.00241897	0.000760975	3.17877	0.00147901	0.02661	1.00168	STK3	protein_coding
ENSG00000134313.15	0.00197184	0.000620334	3.17867	0.00147951	0.02661	1.00137	KIDINS220	protein_coding
ENSG00000160746.12	0.0022552	0.000709769	3.17736	0.0014862	0.0267102	1.00156	ANO10	protein_coding
ENSG00000272666.1	0.00657571	0.00206964	3.17722	0.00148693	0.0267102	1.00457	U62317.1	lincRNA
ENSG00000225342.2	0.00440956	0.00138829	3.17626	0.00149187	0.0267824	1.00306	AC079630.1	antisense
ENSG00000083454.21	-0.00490602	0.00154484	-3.17574	0.00149453	0.0268134	0.996605	P2RX5	protein_coding
ENSG00000278420.1	0.00369868	0.0011648	3.17537	0.00149645	0.0268313	1.00257	MIR6819	miRNA
ENSG00000160888.6	0.00259521	0.000817577	3.17427	0.00150213	0.0269165	1.0018	IER2	protein_coding
ENSG00000179262.9	-0.00457387	0.00144108	-3.17392	0.00150395	0.0269324	0.996835	RAD23A	protein_coding
ENSG00000149177.12	0.00303914	0.000957712	3.17333	0.00150699	0.0269536	1.00211	PTPRJ	protein_coding
ENSG00000151883.17	0.00287959	0.000907422	3.17338	0.00150677	0.0269536	1.002	PARP8	protein_coding
ENSG00000153179.12	0.0026514	0.00083559	3.17309	0.00150824	0.0269591	1.00184	RASSF3	protein_coding
ENSG00000144504.15	-0.00217553	0.00068575	-3.17248	0.00151141	0.0269991	0.998493	ANKMY1	protein_coding
ENSG00000198276.15	-0.0026265	0.000828307	-3.17092	0.00151956	0.027128	0.998181	UCKL1	protein_coding
ENSG00000135838.13	0.00337075	0.00106312	3.17062	0.00152115	0.0271397	1.00234	NPL	protein_coding
ENSG00000067900.7	0.00318263	0.00100391	3.17022	0.00152321	0.0271598	1.00221	ROCK1	protein_coding
ENSG00000266195.2	0.00614071	0.00193802	3.16855	0.00153204	0.027263	1.00427	RN7SL163P	misc_RNA
ENSG00000076513.16	0.00237994	0.000751147	3.16841	0.00153277	0.027263	1.00165	ANKRD13A	protein_coding
ENSG00000261408.7	0.00217297	0.000685804	3.1685	0.00153228	0.027263	1.00151	TEN1-CDK3	protein_coding
ENSG00000115935.17	0.00218912	0.00069082	3.16888	0.00153028	0.027263	1.00152	WIPF1	protein_coding
ENSG00000151552.11	-0.00261385	0.000825045	-3.16813	0.00153424	0.0272724	0.99819	QDPR	protein_coding
ENSG00000207320.1	-0.0039023	0.00123254	-3.16607	0.00154512	0.0273148	0.997299	RF00019	misc_RNA
ENSG00000012124.16	-0.00523125	0.00165223	-3.16617	0.00154458	0.0273148	0.996381	CD22	protein_coding
ENSG00000242999.3	0.00205934	0.000650406	3.16624	0.00154423	0.0273148	1.00143	RN7SL239P	misc_RNA
ENSG00000262714.1	0.00531746	0.00167907	3.16691	0.0015407	0.0273148	1.00369	AC007342.5	lincRNA
ENSG00000226254.1	0.00510807	0.00161332	3.16619	0.00154451	0.0273148	1.00355	PTP4A1P3	processed_pseudogene
ENSG00000211644.3	-0.00556716	0.00175772	-3.16726	0.0015388	0.0273148	0.996149	IGLV1-51	IG_V_gene
ENSG00000198898.13	0.00534273	0.00168717	3.16668	0.00154189	0.0273148	1.00371	CAPZA2	protein_coding
ENSG00000158793.13	0.0014433	0.000455794	3.16656	0.00154253	0.0273148	1.001	NIT1	protein_coding
ENSG00000108039.17	-0.00173704	0.000548497	-3.16691	0.00154066	0.0273148	0.998797	XPNPEP1	protein_coding
ENSG00000105281.12	-0.0061301	0.00193742	-3.16406	0.00155586	0.0274376	0.99576	SLC1A5	protein_coding
ENSG00000268643.1	0.00494839	0.00156372	3.1645	0.00155348	0.0274376	1.00344	AC006486.1	protein_coding
ENSG00000283200.1	-0.00406425	0.00128443	-3.16425	0.00155482	0.0274376	0.997187	MIR1206	miRNA
ENSG00000134996.11	0.00276245	0.000873073	3.16406	0.00155585	0.0274376	1.00192	OSTF1	protein_coding
ENSG00000261167.1	-0.00258944	0.000818524	-3.16354	0.00155861	0.0274693	0.998207	AC107027.3	sense_overlapping
ENSG00000161791.13	-0.00288718	0.000912746	-3.16318	0.00156056	0.0274869	0.998001	FMNL3	protein_coding
ENSG00000240888.1	-0.00368707	0.00116592	-3.16238	0.00156486	0.0275459	0.997448	AC131210.1	sense_intronic
ENSG00000182372.9	-0.00164105	0.000519262	-3.16035	0.00157581	0.0277217	0.998863	CLN8	protein_coding
ENSG00000251259.1	0.00410908	0.00130057	3.15945	0.00158069	0.0277908	1.00285	AC004069.1	lincRNA
ENSG00000114491.13	-0.00176406	0.000558558	-3.15824	0.00158723	0.0278887	0.998778	UMPS	protein_coding
ENSG00000135537.16	-0.00134877	0.000427117	-3.15784	0.00158944	0.0279107	0.999066	AFG1L	protein_coding
ENSG00000099804.8	-0.00604291	0.00191405	-3.15713	0.00159332	0.0279619	0.99582	CDC34	protein_coding
ENSG00000148842.17	-0.00184394	0.000584142	-3.15666	0.00159589	0.0279899	0.998723	CNNM2	protein_coding
ENSG00000260711.2	-0.00289128	0.00091609	-3.15611	0.00159889	0.0280086	0.997998	AL121839.2	sense_intronic
ENSG00000100596.6	0.00225546	0.000714594	3.15628	0.00159796	0.0280086	1.00156	SPTLC2	protein_coding
ENSG00000105393.15	-0.00395243	0.00125248	-3.15569	0.0016012	0.0280322	0.997264	BABAM1	protein_coding
ENSG00000219470.1	-0.00477587	0.00151381	-3.15487	0.00160571	0.0280941	0.996695	AL355802.1	processed_pseudogene
ENSG00000179409.10	-0.00194088	0.000615407	-3.15381	0.00161154	0.028129	0.998656	GEMIN4	protein_coding
ENSG00000241868.3	0.0019382	0.000614553	3.15384	0.00161138	0.028129	1.00134	RN7SL434P	misc_RNA
ENSG00000181788.3	-0.00612768	0.00194295	-3.1538	0.00161159	0.028129	0.995762	SIAH2	protein_coding
ENSG00000162408.10	-0.00166412	0.00052764	-3.1539	0.00161105	0.028129	0.998847	NOL9	protein_coding
ENSG00000125818.17	-0.00478441	0.00151735	-3.15314	0.00161527	0.0281762	0.996689	PSMF1	protein_coding
ENSG00000008441.16	-0.00573814	0.00182013	-3.1526	0.00161823	0.0282108	0.996031	NFIX	protein_coding
ENSG00000058673.16	0.00257858	0.000817985	3.15236	0.00161957	0.0282173	1.00179	ZC3H11A	protein_coding
ENSG00000235381.1	-0.00220984	0.000701107	-3.15193	0.00162196	0.0282418	0.998469	AL596202.1	antisense
ENSG00000136478.7	-0.00158069	0.000501559	-3.15156	0.00162399	0.0282435	0.998905	TEX2	protein_coding
ENSG00000148832.15	-0.00245076	0.000777635	-3.15156	0.00162401	0.0282435	0.998303	PAOX	protein_coding
ENSG00000163141.19	0.00270401	0.000858133	3.15104	0.00162689	0.0282767	1.00188	BNIPL	protein_coding
ENSG00000058063.15	0.00331427	0.00105242	3.14917	0.00163734	0.0284411	1.0023	ATP11B	protein_coding
ENSG00000125843.10	-0.00115452	0.000366667	-3.1487	0.00164	0.0284456	0.9992	AP5S1	protein_coding
ENSG00000109685.17	-0.00176274	0.000559877	-3.14843	0.00164148	0.0284456	0.998779	NSD2	protein_coding
ENSG00000268516.2	-0.00238041	0.000755998	-3.1487	0.00163998	0.0284456	0.998351	AC020915.3	antisense
ENSG00000262879.5	-0.00197598	0.00062761	-3.14843	0.00164152	0.0284456	0.998631	AC068152.1	processed_transcript
ENSG00000080815.18	0.00223626	0.000710375	3.148	0.0016439	0.0284527	1.00155	PSEN1	protein_coding
ENSG00000111276.10	0.00267131	0.000848535	3.14814	0.00164311	0.0284527	1.00185	CDKN1B	protein_coding
ENSG00000104870.12	0.00329459	0.00104701	3.14666	0.0016515	0.0285161	1.00229	FCGRT	protein_coding
ENSG00000134864.10	-0.00241037	0.000766021	-3.14661	0.00165174	0.0285161	0.998331	GGACT	protein_coding
ENSG00000144635.8	0.0030313	0.000963382	3.14652	0.00165226	0.0285161	1.0021	DYNC1LI1	protein_coding
ENSG00000115525.17	-0.00183261	0.000582433	-3.14648	0.00165249	0.0285161	0.998731	ST3GAL5	protein_coding
ENSG00000276770.1	-0.004137	0.00131459	-3.14699	0.0016496	0.0285161	0.997137	MIR6780B	miRNA
ENSG00000244627.5	0.00183102	0.000582341	3.14424	0.00166518	0.0287179	1.00127	TPTEP2	transcribed_unprocessed_pseudogene
ENSG00000251393.3	0.00410768	0.00130652	3.14398	0.00166666	0.0287264	1.00285	AC005280.1	processed_transcript
ENSG00000125846.15	-0.00157687	0.000501696	-3.14308	0.00167183	0.0287982	0.998908	ZNF133	protein_coding
ENSG00000100228.12	0.0043173	0.00137369	3.14286	0.00167306	0.0288023	1.003	RAB36	protein_coding
ENSG00000167483.17	-0.00374818	0.0011927	-3.14262	0.00167445	0.0288091	0.997405	FAM129C	protein_coding
ENSG00000217624.2	-0.00427822	0.00136218	-3.14071	0.00168542	0.0289805	0.997039	AL627402.1	processed_pseudogene
ENSG00000102921.7	0.00254349	0.000810343	3.13878	0.00169653	0.0291542	1.00176	N4BP1	protein_coding
ENSG00000266160.2	0.00399258	0.00127217	3.13841	0.00169869	0.0291568	1.00277	RN7SL612P	misc_RNA
ENSG00000120709.10	0.00339583	0.00108197	3.13856	0.00169778	0.0291568	1.00236	FAM53C	protein_coding
ENSG00000130695.15	-0.00177297	0.000564985	-3.13809	0.00170052	0.029171	0.998772	CEP85	protein_coding
ENSG00000214093.3	-0.00359442	0.00114572	-3.13727	0.00170529	0.0292188	0.997512	AL096701.1	processed_pseudogene
ENSG00000116922.14	-0.00182451	0.000581562	-3.13726	0.00170533	0.0292188	0.998736	C1orf109	protein_coding
ENSG00000197157.10	-0.00219598	0.000700037	-3.13694	0.00170721	0.0292337	0.998479	SND1	protein_coding
ENSG00000276445.1	-0.00262583	0.000837235	-3.13632	0.00171085	0.0292787	0.998182	AC005393.1	lincRNA
ENSG00000150527.17	0.00196788	0.000627536	3.13588	0.0017134	0.029305	1.00136	MIA2	protein_coding
ENSG00000263843.1	-0.00317587	0.00101292	-3.13535	0.00171646	0.0293401	0.997801	AC022211.2	antisense
ENSG00000102786.14	0.001968	0.000627872	3.1344	0.00172205	0.0294183	1.00137	INTS6	protein_coding
ENSG00000101084.17	0.00300085	0.000957746	3.13325	0.00172883	0.0295167	1.00208	RAB5IF	protein_coding
ENSG00000151353.14	-0.00160963	0.000513837	-3.13256	0.00173286	0.029568	0.998885	TMEM18	protein_coding
ENSG00000259399.1	-0.00413292	0.00131974	-3.13163	0.0017384	0.0296449	0.997139	TGIF2-RAB5IF	protein_coding
ENSG00000133422.12	-0.00183792	0.000587027	-3.13089	0.00174277	0.0296879	0.998727	MORC2	protein_coding
ENSG00000259287.2	-0.00343694	0.00109779	-3.13079	0.0017434	0.0296879	0.997621	AC010809.1	antisense
ENSG00000007968.6	-0.00634536	0.00202694	-3.13051	0.00174502	0.0296879	0.995611	E2F2	protein_coding
ENSG00000120915.13	-0.0027526	0.000879267	-3.13056	0.00174474	0.0296879	0.998094	EPHX2	protein_coding
ENSG00000255328.1	0.00484885	0.00154926	3.12978	0.00174939	0.0297448	1.00337	AC136475.5	lincRNA
ENSG00000107815.9	-0.00207547	0.000663274	-3.12913	0.00175328	0.0297672	0.998562	TWNK	protein_coding
ENSG00000138449.10	0.00356445	0.00113906	3.12931	0.00175219	0.0297672	1.00247	SLC40A1	protein_coding
ENSG00000272914.1	0.00398058	0.00127214	3.12904	0.0017538	0.0297672	1.00276	AL359532.1	sense_intronic
ENSG00000116489.12	0.00445871	0.0014252	3.12848	0.00175714	0.0298065	1.0031	CAPZA1	protein_coding
ENSG00000258101.2	0.00542394	0.00173404	3.12792	0.00176048	0.0298225	1.00377	AC010173.1	antisense
ENSG00000160229.11	0.00371521	0.00118779	3.12784	0.00176093	0.0298225	1.00258	ZNF66	protein_coding
ENSG00000146540.14	-0.00245777	0.000785781	-3.1278	0.00176118	0.0298225	0.998298	C7orf50	protein_coding
ENSG00000256372.1	0.00575144	0.0018392	3.12714	0.00176517	0.0298571	1.00399	AC023050.2	processed_pseudogene
ENSG00000238260.1	0.00275743	0.000881779	3.12712	0.00176528	0.0298571	1.00191	AL513320.1	antisense
ENSG00000263786.1	0.00380132	0.00121567	3.12692	0.00176647	0.0298598	1.00264	AC022211.1	sense_intronic
ENSG00000168297.15	0.00237066	0.000758258	3.12646	0.00176924	0.0298739	1.00164	PXK	protein_coding
ENSG00000233393.1	0.00367351	0.00117498	3.12644	0.00176937	0.0298739	1.00255	AP000688.2	lincRNA
ENSG00000186166.8	-0.00165016	0.000527864	-3.12611	0.00177134	0.0298898	0.998857	CCDC84	protein_coding
ENSG00000274963.1	0.00353132	0.00113001	3.12503	0.00177788	0.0299734	1.00245	RN7SL600P	misc_RNA
ENSG00000169403.11	0.00353615	0.00113159	3.12495	0.00177837	0.0299734	1.00245	PTAFR	protein_coding
ENSG00000196663.15	0.00383434	0.00122718	3.12451	0.00178103	0.0300007	1.00266	TECPR2	protein_coding
ENSG00000197405.7	0.00414182	0.00132622	3.12303	0.00178999	0.0300307	1.00288	C5AR1	protein_coding
ENSG00000279811.1	0.0030514	0.00097681	3.12384	0.00178506	0.0300307	1.00212	AC093330.2	TEC
ENSG00000090554.12	-0.00252843	0.000809607	-3.12303	0.00179	0.0300307	0.998249	FLT3LG	protein_coding
ENSG00000153896.17	-0.00176294	0.000564499	-3.12302	0.00179007	0.0300307	0.998779	ZNF599	protein_coding
ENSG00000181778.4	0.00499987	0.00160082	3.12331	0.00178827	0.0300307	1.00347	TMEM252	protein_coding
ENSG00000229124.6	0.00272889	0.000873565	3.12386	0.00178498	0.0300307	1.00189	VIM-AS1	antisense
ENSG00000183307.3	0.00518005	0.00165858	3.12319	0.00178903	0.0300307	1.0036	TMEM121B	protein_coding
ENSG00000112697.15	0.00335197	0.0010734	3.12277	0.00179156	0.0300382	1.00233	TMEM30A	protein_coding
ENSG00000197943.9	0.0026765	0.000857321	3.12193	0.00179668	0.0301066	1.00186	PLCG2	protein_coding
ENSG00000281958.1	-0.00375826	0.00120398	-3.12154	0.00179906	0.0301291	0.997398	TRBJ1-4	TR_J_gene
ENSG00000258752.1	0.00380435	0.00121883	3.12131	0.0018005	0.0301358	1.00264	AL357093.2	antisense
ENSG00000134686.18	0.00449758	0.00144144	3.1202	0.00180731	0.0302162	1.00312	PHC2	protein_coding
ENSG00000067113.16	-0.00282707	0.000906061	-3.12018	0.0018074	0.0302162	0.998042	PLPP1	protein_coding
ENSG00000213658.11	-0.00246451	0.000789984	-3.1197	0.00181036	0.0302308	0.998293	LAT	protein_coding
ENSG00000112715.21	0.00316001	0.00101287	3.11985	0.00180946	0.0302308	1.00219	VEGFA	protein_coding
ENSG00000118046.14	-0.00380403	0.0012196	-3.11909	0.00181412	0.0302762	0.997367	STK11	protein_coding
ENSG00000106799.12	0.00327234	0.0010493	3.1186	0.00181715	0.0303092	1.00227	TGFBR1	protein_coding
ENSG00000172985.10	0.00443122	0.00142117	3.118	0.00182083	0.0303532	1.00308	SH3RF3	protein_coding
ENSG00000096746.17	0.00249255	0.000799637	3.1171	0.00182642	0.0304287	1.00173	HNRNPH3	protein_coding
ENSG00000261468.1	0.00248303	0.000796755	3.11643	0.00183056	0.0304803	1.00172	AC096921.2	sense_overlapping
ENSG00000264968.1	0.00268402	0.00086149	3.11556	0.00183595	0.0305524	1.00186	AC090844.2	lincRNA
ENSG00000175197.12	0.00359454	0.00115385	3.11526	0.00183783	0.0305661	1.00249	DDIT3	protein_coding
ENSG00000165801.9	0.00424251	0.00136193	3.11508	0.00183897	0.0305674	1.00295	ARHGEF40	protein_coding
ENSG00000270015.1	-0.00279994	0.00089897	-3.11461	0.00184187	0.0305981	0.998061	AC087481.3	sense_intronic
ENSG00000158850.14	-0.00342242	0.0010989	-3.11442	0.00184308	0.0306007	0.997631	B4GALT3	protein_coding
ENSG00000227945.1	-0.00760435	0.00244195	-3.11405	0.00184539	0.0306215	0.994743	AL590006.1	antisense
ENSG00000105371.9	-0.0039739	0.00127622	-3.11381	0.00184688	0.0306286	0.997249	ICAM4	protein_coding
ENSG00000235672.1	-0.00315433	0.00101319	-3.11328	0.00185023	0.0306666	0.997816	AC090286.2	transcribed_processed_pseudogene
ENSG00000259713.1	0.00376476	0.00120942	3.11287	0.00185277	0.0306911	1.00261	AC013391.2	sense_overlapping
ENSG00000237188.4	-0.00286289	0.000919811	-3.11247	0.00185527	0.0306963	0.998018	AC242426.2	antisense
ENSG00000135775.13	-0.00151682	0.000487387	-3.11215	0.00185733	0.0306963	0.998949	COG2	protein_coding
ENSG00000139178.10	0.0029858	0.000959379	3.11223	0.00185682	0.0306963	1.00207	C1RL	protein_coding
ENSG00000155096.13	0.00269861	0.000867047	3.11242	0.0018556	0.0306963	1.00187	AZIN1	protein_coding
ENSG00000087269.15	-0.00188272	0.000605066	-3.1116	0.00186077	0.0307023	0.998696	NOP14	protein_coding
ENSG00000116044.15	0.00254991	0.000819447	3.11175	0.00185984	0.0307023	1.00177	NFE2L2	protein_coding
ENSG00000164691.17	0.00254108	0.000816653	3.11158	0.00186087	0.0307023	1.00176	TAGAP	protein_coding
ENSG00000205250.8	-0.00291428	0.000936802	-3.11089	0.00186527	0.0307573	0.997982	E2F4	protein_coding
ENSG00000100583.4	0.00511983	0.001646	3.11046	0.00186796	0.0307842	1.00356	SAMD15	protein_coding
ENSG00000247679.2	-0.00270339	0.000869397	-3.10949	0.00187408	0.0308673	0.998128	AC139795.2	antisense
ENSG00000253250.2	0.00489943	0.00157574	3.10928	0.00187543	0.0308721	1.0034	C8orf88	protein_coding
ENSG00000091106.18	0.00329332	0.00105928	3.10902	0.00187709	0.0308818	1.00229	NLRC4	protein_coding
ENSG00000185896.10	0.00273593	0.000880162	3.10844	0.00188079	0.0309179	1.0019	LAMP1	protein_coding
ENSG00000273084.1	0.00441875	0.00142158	3.10834	0.00188142	0.0309179	1.00307	AC092171.5	lincRNA
ENSG00000204872.4	-0.00669545	0.0021543	-3.10795	0.00188392	0.0309413	0.99537	NAT8B	polymorphic_pseudogene
ENSG00000177192.13	-0.00159009	0.000511665	-3.10768	0.00188564	0.0309521	0.998898	PUS1	protein_coding
ENSG00000260077.1	-0.00234453	0.000754581	-3.10706	0.00188956	0.0309989	0.998376	AC104794.2	lincRNA
ENSG00000101004.14	0.00631852	0.00203393	3.10656	0.00189278	0.0310341	1.00439	NINL	protein_coding
ENSG00000274403.1	-0.00287401	0.000925225	-3.10629	0.00189453	0.0310452	0.99801	AC090510.2	antisense
ENSG00000177370.4	-0.00187833	0.000604776	-3.10582	0.00189753	0.0310767	0.998699	TIMM22	protein_coding
ENSG00000110876.9	0.00295454	0.000951634	3.10471	0.00190467	0.031176	1.00205	SELPLG	protein_coding
ENSG00000255655.1	-0.00323281	0.00104144	-3.10419	0.00190804	0.0312135	0.997762	AC007570.1	antisense
ENSG00000082196.20	-0.00244121	0.000786678	-3.10319	0.0019145	0.0313015	0.998309	C1QTNF3	protein_coding
ENSG00000260571.1	-0.00264938	0.000853913	-3.10264	0.00191804	0.0313417	0.998165	BNIP3P5	processed_pseudogene
ENSG00000141384.12	-0.00275182	0.000887232	-3.10157	0.00192496	0.0313941	0.998094	TAF4B	protein_coding
ENSG00000126602.10	-0.0022355	0.000720787	-3.10148	0.00192558	0.0313941	0.998452	TRAP1	protein_coding
ENSG00000115808.11	0.0019784	0.000637808	3.10187	0.00192302	0.0313941	1.00137	STRN	protein_coding
ENSG00000279136.1	0.00915634	0.00295205	3.10169	0.0019242	0.0313941	1.00637	AL031258.1	TEC
ENSG00000168461.12	0.00315567	0.00101756	3.10122	0.00192726	0.0314037	1.00219	RAB31	protein_coding
ENSG00000198799.11	-0.00155049	0.000500035	-3.10076	0.00193027	0.031435	0.998926	LRIG2	protein_coding
ENSG00000211728.2	-0.0054659	0.00176296	-3.10041	0.00193256	0.0314546	0.996218	TRBV5-6	TR_V_gene
ENSG00000164430.15	0.00201685	0.000650573	3.10011	0.00193446	0.0314679	1.0014	CGAS	protein_coding
ENSG00000168916.15	0.00494094	0.00159389	3.09992	0.00193571	0.0314706	1.00343	ZNF608	protein_coding
ENSG00000118260.14	0.00264932	0.000854971	3.09872	0.00194359	0.0315809	1.00184	CREB1	protein_coding
ENSG00000256706.1	0.00350343	0.00113078	3.09823	0.0019468	0.0316152	1.00243	AC005342.2	antisense
ENSG00000273399.2	-0.00418092	0.00134958	-3.09794	0.00194872	0.0316288	0.997106	AL159169.3	lincRNA
ENSG00000074181.8	0.00671	0.00216643	3.09726	0.0019532	0.0316837	1.00466	NOTCH3	protein_coding
ENSG00000198671.3	0.0023253	0.000751253	3.09523	0.00196659	0.0318784	1.00161	AC135895.1	antisense
ENSG00000065600.12	-0.0018211	0.000588381	-3.09511	0.00196741	0.0318784	0.998739	TMEM206	protein_coding
ENSG00000151948.11	0.00368727	0.0011914	3.0949	0.00196877	0.0318826	1.00256	GLT1D1	protein_coding
ENSG00000259379.1	0.00569152	0.00183975	3.09365	0.00197713	0.0320002	1.00395	MTND5P32	processed_pseudogene
ENSG00000197054.11	0.00288916	0.000934106	3.09296	0.00198168	0.0320379	1.002	ZNF763	protein_coding
ENSG00000103257.8	-0.00519571	0.00167977	-3.09311	0.00198069	0.0320379	0.996405	SLC7A5	protein_coding
ENSG00000172270.19	-0.00624959	0.00202102	-3.0923	0.00198615	0.0320744	0.995677	BSG	protein_coding
ENSG00000110315.6	0.0031555	0.00102043	3.09232	0.00198597	0.0320744	1.00219	RNF141	protein_coding
ENSG00000142347.17	0.00352731	0.0011411	3.09115	0.00199381	0.0321382	1.00245	MYO1F	protein_coding
ENSG00000264548.1	0.00335164	0.00108437	3.09085	0.00199584	0.0321382	1.00233	AC132872.2	antisense
ENSG00000225808.1	0.0028858	0.000933711	3.09067	0.00199703	0.0321382	1.002	DNAJC19P5	processed_pseudogene
ENSG00000170956.16	0.00421732	0.00136459	3.09055	0.00199788	0.0321382	1.00293	CEACAM3	protein_coding
ENSG00000163131.10	0.00369359	0.00119493	3.09104	0.00199454	0.0321382	1.00256	CTSS	protein_coding
ENSG00000183172.8	-0.00224606	0.000726692	-3.0908	0.00199618	0.0321382	0.998444	SMDT1	protein_coding
ENSG00000214626.2	-0.00447674	0.00144812	-3.09141	0.00199209	0.0321382	0.996902	POLR3DP1	processed_pseudogene
ENSG00000176845.12	0.00318389	0.00103036	3.09008	0.002001	0.0321706	1.00221	METRNL	protein_coding
ENSG00000005812.10	0.00290761	0.000941147	3.08944	0.00200535	0.0322047	1.00202	FBXL3	protein_coding
ENSG00000131236.16	0.00245873	0.000795825	3.08954	0.00200469	0.0322047	1.00171	CAP1	protein_coding
ENSG00000069399.14	0.00426621	0.00138106	3.08907	0.00200782	0.0322264	1.00296	BCL3	protein_coding
ENSG00000180712.3	0.00437579	0.00141678	3.08855	0.00201133	0.0322649	1.00304	LINC02363	lincRNA
ENSG00000280997.1	-0.00416542	0.00134875	-3.08836	0.00201265	0.0322682	0.997117	CCAT2	lincRNA
ENSG00000188559.14	0.00290898	0.000942093	3.08778	0.00201655	0.0323114	1.00202	RALGAPA2	protein_coding
ENSG00000006744.18	-0.00159238	0.000515728	-3.08763	0.00201758	0.0323114	0.998897	ELAC2	protein_coding
ENSG00000023287.12	0.00376161	0.00121844	3.08723	0.00202033	0.0323376	1.00261	RB1CC1	protein_coding
ENSG00000163960.11	0.00171789	0.000556761	3.08552	0.00203199	0.0325063	1.00119	UBXN7	protein_coding
ENSG00000244005.12	-0.00109704	0.000355657	-3.08453	0.00203871	0.0325533	0.99924	NFS1	protein_coding
ENSG00000092094.10	-0.00146933	0.000476343	-3.08461	0.00203818	0.0325533	0.998982	OSGEP	protein_coding
ENSG00000188487.11	0.00645641	0.00209334	3.08426	0.00204056	0.0325533	1.00449	INSC	protein_coding
ENSG00000213542.3	0.00368113	0.00119335	3.08471	0.00203754	0.0325533	1.00255	AC007000.1	processed_pseudogene
ENSG00000155097.11	0.00228768	0.000741724	3.08427	0.0020405	0.0325533	1.00159	ATP6V1C1	protein_coding
ENSG00000112149.9	-0.00322331	0.00104528	-3.08369	0.00204451	0.0325984	0.997768	CD83	protein_coding
ENSG00000269837.1	-0.00213706	0.000693201	-3.08288	0.00205006	0.032651	0.99852	IPO5P1	transcribed_processed_pseudogene
ENSG00000179532.12	-0.00348979	0.00113199	-3.08289	0.00205004	0.032651	0.997584	DNHD1	protein_coding
ENSG00000177337.7	0.00218541	0.000708982	3.08246	0.00205299	0.0326617	1.00152	DLGAP1-AS1	antisense
ENSG00000227666.1	-0.00304897	0.000989104	-3.08255	0.00205232	0.0326617	0.997889	CYCSP24	processed_pseudogene
ENSG00000140396.12	0.00214275	0.000695273	3.08189	0.00205693	0.0327063	1.00149	NCOA2	protein_coding
ENSG00000148399.12	-0.00194203	0.000630494	-3.08018	0.00206876	0.0328764	0.998655	DPH7	protein_coding
ENSG00000173011.11	0.00177905	0.000577711	3.07949	0.00207356	0.0329287	1.00123	TADA2B	protein_coding
ENSG00000064419.13	0.00184288	0.000598459	3.07938	0.00207433	0.0329287	1.00128	TNPO3	protein_coding
ENSG00000168071.21	0.00323919	0.00105217	3.07859	0.00207981	0.0329977	1.00225	CCDC88B	protein_coding
ENSG00000141759.14	-0.00161646	0.000525261	-3.07743	0.00208792	0.0331081	0.99888	TXNL4A	protein_coding
ENSG00000139797.7	0.00325185	0.00105688	3.07684	0.00209205	0.0331373	1.00226	RNF113B	protein_coding
ENSG00000126561.16	0.00246529	0.000801228	3.07689	0.00209174	0.0331373	1.00171	STAT5A	protein_coding
ENSG00000133069.16	-0.00604942	0.00196696	-3.07552	0.00210136	0.0332666	0.995816	TMCC2	protein_coding
ENSG00000196684.12	0.00375304	0.0012205	3.07501	0.00210495	0.0332983	1.0026	HSH2D	protein_coding
ENSG00000212529.1	-0.00367103	0.00119387	-3.07491	0.00210566	0.0332983	0.997459	RF00191	snoRNA
ENSG00000272501.1	0.00244375	0.000794795	3.07469	0.0021072	0.0333044	1.0017	AL662844.4	antisense
ENSG00000185010.14	0.00225226	0.000732621	3.07425	0.0021103	0.0333351	1.00156	F8	protein_coding
ENSG00000049541.10	0.00181712	0.000591207	3.07358	0.00211507	0.0333923	1.00126	RFC2	protein_coding
ENSG00000144524.17	-0.00182242	0.000593335	-3.07149	0.00212993	0.0336002	0.998738	COPS7B	protein_coding
ENSG00000054267.21	0.00285488	0.000929503	3.0714	0.00213056	0.0336002	1.00198	ARID4B	protein_coding
ENSG00000125780.11	0.00657134	0.00213971	3.07114	0.00213241	0.0336111	1.00457	TGM3	protein_coding
ENSG00000115687.13	-0.00301386	0.000981759	-3.06986	0.00214159	0.0337373	0.997913	PASK	protein_coding
ENSG00000113163.16	0.00193173	0.000629492	3.06871	0.00214988	0.0338495	1.00134	COL4A3BP	protein_coding
ENSG00000099785.10	-0.00477391	0.00155676	-3.06657	0.0021653	0.0340112	0.996696	2023-03-02	protein_coding
ENSG00000141985.9	-0.0033057	0.00107796	-3.06663	0.00216483	0.0340112	0.997711	SH3GL1	protein_coding
ENSG00000254732.1	-0.0052406	0.00170875	-3.06692	0.00216276	0.0340112	0.996374	AP001931.1	protein_coding
ENSG00000233716.1	-0.00402681	0.00131298	-3.06694	0.00216265	0.0340112	0.997213	AC074367.1	processed_pseudogene
ENSG00000163848.19	0.00300642	0.000980418	3.06647	0.00216602	0.0340112	1.00209	ZNF148	protein_coding
ENSG00000206728.1	-0.00545307	0.00177877	-3.06564	0.00217201	0.0340867	0.996227	RF00019	misc_RNA
ENSG00000167986.13	-0.00260355	0.000849396	-3.06518	0.00217541	0.0341215	0.998197	DDB1	protein_coding
ENSG00000142156.14	0.00793307	0.0025886	3.06462	0.00217946	0.034142	1.00551	COL6A1	protein_coding
ENSG00000151715.7	0.00356437	0.00116315	3.06442	0.00218096	0.034142	1.00247	TMEM45B	protein_coding
ENSG00000268392.1	0.00412067	0.00134471	3.06435	0.00218143	0.034142	1.00286	AC003682.1	lincRNA
ENSG00000242860.3	0.00260968	0.000851593	3.06447	0.00218059	0.034142	1.00181	RN7SL180P	misc_RNA
ENSG00000259070.5	0.00600063	0.00195913	3.06291	0.00219199	0.0342868	1.00417	LINC00639	lincRNA
ENSG00000138613.13	0.00173802	0.000567468	3.06276	0.00219306	0.0342868	1.00121	APH1B	protein_coding
ENSG00000279557.1	-0.00251726	0.000821985	-3.06241	0.00219562	0.0343083	0.998257	AC010435.1	TEC
ENSG00000144802.11	0.00244077	0.000797239	3.06152	0.00220215	0.0343917	1.00169	NFKBIZ	protein_coding
ENSG00000275569.1	0.00418793	0.00136877	3.05964	0.00221602	0.0345339	1.00291	AL355073.2	antisense
ENSG00000093010.13	-0.00213857	0.00069893	-3.05978	0.002215	0.0345339	0.998519	COMT	protein_coding
ENSG00000110852.4	0.00481806	0.00157452	3.06001	0.00221329	0.0345339	1.00335	CLEC2B	protein_coding
ENSG00000265874.1	0.00386006	0.0012616	3.05965	0.00221595	0.0345339	1.00268	MIR4489	miRNA
ENSG00000186141.8	-0.00159847	0.000522527	-3.0591	0.00222	0.0345772	0.998893	POLR3C	protein_coding
ENSG00000215241.3	0.00275642	0.000901262	3.0584	0.00222522	0.0346399	1.00191	LINC02449	lincRNA
ENSG00000235852.1	-0.00309226	0.00101123	-3.05792	0.00222879	0.0346769	0.997859	AC005540.1	antisense
ENSG00000111885.6	0.00299845	0.000980609	3.05775	0.00223009	0.0346784	1.00208	MAN1A1	protein_coding
ENSG00000186575.17	-0.00173627	0.000567909	-3.0573	0.00223341	0.0347113	0.998797	NF2	protein_coding
ENSG00000271259.1	0.00393435	0.00128697	3.05707	0.0022351	0.034719	1.00273	AC010201.1	lincRNA
ENSG00000278462.1	-0.00196866	0.000644119	-3.05637	0.00224038	0.0347823	0.998636	AL359880.1	sense_intronic
ENSG00000169413.2	0.0045264	0.00148122	3.05586	0.00224413	0.0347878	1.00314	RNASE6	protein_coding
ENSG00000163659.12	0.0024719	0.000808881	3.05595	0.00224345	0.0347878	1.00171	TIPARP	protein_coding
ENSG00000204946.9	-0.00189611	0.000620521	-3.05568	0.00224553	0.0347878	0.998687	ZNF783	protein_coding
ENSG00000228801.5	-0.00193506	0.000633248	-3.05576	0.00224488	0.0347878	0.99866	AC064807.1	antisense
ENSG00000266957.1	-0.00329999	0.00108044	-3.0543	0.0022559	0.0349296	0.997715	AC012254.1	antisense
ENSG00000236463.1	-0.00322582	0.00105628	-3.05393	0.00225862	0.0349531	0.997767	LINC00427	lincRNA
ENSG00000169180.11	0.00314342	0.00102947	3.05344	0.0022623	0.0349913	1.00218	XPO6	protein_coding
ENSG00000187531.13	0.00208593	0.000683377	3.05238	0.00227036	0.035063	1.00145	SIRT7	protein_coding
ENSG00000114316.12	0.00231959	0.000759868	3.05263	0.00226846	0.035063	1.00161	USP4	protein_coding
ENSG00000265148.5	-0.00230108	0.000753872	-3.05235	0.00227057	0.035063	0.998406	TSPOAP1-AS1	antisense
ENSG00000213139.7	-0.00204576	0.000670279	-3.0521	0.00227247	0.0350737	0.998583	CRYGS	protein_coding
ENSG00000131043.11	-0.00158982	0.000521034	-3.05128	0.0022787	0.035151	0.998899	AAR2	protein_coding
ENSG00000167994.11	-0.00675344	0.002214	-3.05033	0.00228592	0.0352436	0.99533	RAB3IL1	protein_coding
ENSG00000116983.12	-0.00472913	0.00155088	-3.04932	0.0022936	0.0353431	0.996727	HPCAL4	protein_coding
ENSG00000197601.12	0.00393356	0.00129027	3.04862	0.00229893	0.0354065	1.00273	FAR1	protein_coding
ENSG00000271856.1	-0.00217171	0.00071301	-3.04584	0.00232034	0.0357172	0.998496	LINC01215	lincRNA
ENSG00000133962.7	-0.00278152	0.000913426	-3.04515	0.00232561	0.0357792	0.998074	CATSPERB	protein_coding
ENSG00000115339.13	0.00309375	0.00101632	3.04408	0.00233393	0.0358881	1.00215	GALNT3	protein_coding
ENSG00000157514.16	0.00353729	0.0011629	3.04179	0.0023518	0.0361245	1.00245	TSC22D3	protein_coding
ENSG00000253218.1	-0.00314688	0.00103451	-3.0419	0.00235094	0.0361245	0.997821	KLF3P1	processed_pseudogene
ENSG00000118308.15	0.00265333	0.000872407	3.04139	0.00235492	0.0361533	1.00184	LRMP	protein_coding
ENSG00000249635.1	-0.00321282	0.00105655	-3.04087	0.00235897	0.0361963	0.997776	AC109361.1	antisense
ENSG00000234997.1	0.00469559	0.00154501	3.03919	0.00237215	0.0363792	1.00326	AC016745.1	antisense
ENSG00000284956.1	0.00427152	0.00140605	3.03795	0.00238194	0.03651	1.00297	AC107959.5	protein_coding
ENSG00000170006.11	0.00280518	0.000923591	3.03726	0.00238741	0.0365602	1.00195	TMEM154	protein_coding
ENSG00000109854.13	0.00273602	0.00090083	3.03722	0.00238774	0.0365602	1.0019	HTATIP2	protein_coding
ENSG00000197296.5	-0.0019064	0.000627919	-3.03606	0.00239694	0.0365773	0.998679	FITM2	protein_coding
ENSG00000089022.13	-0.00121379	0.000399687	-3.03685	0.00239067	0.0365773	0.999159	MAPKAPK5	protein_coding
ENSG00000273004.1	0.00407235	0.0013413	3.03612	0.00239643	0.0365773	1.00283	AL078644.1	lincRNA
ENSG00000229191.1	0.00345059	0.0011364	3.03642	0.00239405	0.0365773	1.00239	AL358473.1	antisense
ENSG00000272562.1	0.00267074	0.00087949	3.03669	0.00239193	0.0365773	1.00185	AL512343.2	antisense
ENSG00000146192.14	-0.00337262	0.00111074	-3.03639	0.00239432	0.0365773	0.997665	FGD2	protein_coding
ENSG00000146409.11	-0.00273612	0.000901237	-3.03596	0.0023977	0.0365773	0.998105	SLC18B1	protein_coding
ENSG00000285730.1	0.00350621	0.00115553	3.03428	0.00241113	0.0367628	1.00243	Z94721.3	bidirectional_promoter_lncRNA
ENSG00000136383.6	0.00498122	0.00164312	3.03157	0.00243284	0.0370743	1.00346	ALPK3	protein_coding
ENSG00000263528.7	-0.00226973	0.000748764	-3.0313	0.00243504	0.0370882	0.998428	IKBKE	protein_coding
ENSG00000163565.18	0.00321288	0.00106086	3.02857	0.00245717	0.0374057	1.00223	IFI16	protein_coding
ENSG00000265996.1	0.00308925	0.0010203	3.0278	0.00246338	0.0374804	1.00214	MIR3671	miRNA
ENSG00000123329.17	0.00373947	0.0012352	3.02742	0.0024665	0.0375081	1.0026	ARHGAP9	protein_coding
ENSG00000064270.12	0.00700472	0.00231462	3.02629	0.00247575	0.0375909	1.00487	ATP2C2	protein_coding
ENSG00000122965.10	-0.00202826	0.00067015	-3.02658	0.00247337	0.0375909	0.998595	RBM19	protein_coding
ENSG00000114270.17	0.00669865	0.00221361	3.02612	0.00247714	0.0375909	1.00465	COL7A1	protein_coding
ENSG00000134215.15	0.00217665	0.000719276	3.02616	0.00247679	0.0375909	1.00151	VAV3	protein_coding
ENSG00000111203.12	-0.00185205	0.000612097	-3.02575	0.00248019	0.0376175	0.998717	ITFG2	protein_coding
ENSG00000167110.17	0.00222635	0.000735854	3.02554	0.00248193	0.0376241	1.00154	GOLGA2	protein_coding
ENSG00000172216.5	0.00324111	0.00107143	3.02504	0.00248601	0.0376664	1.00225	CEBPB	protein_coding
ENSG00000182463.15	-0.00417867	0.00138147	-3.0248	0.00248801	0.0376769	0.997108	TSHZ2	protein_coding
ENSG00000101336.13	0.00316268	0.0010457	3.02446	0.00249081	0.0376996	1.00219	HCK	protein_coding
ENSG00000111432.4	0.00773958	0.00255962	3.02372	0.0024969	0.037772	1.00538	FZD10	protein_coding
ENSG00000269243.1	0.00780401	0.00258157	3.02297	0.00250305	0.0378343	1.00542	AC008894.2	antisense
ENSG00000257915.1	0.00377748	0.00124962	3.0229	0.00250363	0.0378343	1.00262	GLULP5	processed_pseudogene
ENSG00000004939.14	-0.00725393	0.00240065	-3.02166	0.00251397	0.0379706	0.994985	SLC4A1	protein_coding
ENSG00000277246.1	0.00306157	0.00101339	3.02112	0.00251838	0.0380174	1.00212	AL157762.1	sense_intronic
ENSG00000136153.19	-0.00217739	0.00072087	-3.02051	0.00252352	0.0380752	0.998492	LMO7	protein_coding
ENSG00000006712.14	0.00216827	0.000717905	3.02027	0.00252552	0.0380855	1.0015	PAF1	protein_coding
ENSG00000166912.16	0.00220574	0.000730476	3.01959	0.00253117	0.0381382	1.00153	MTMR10	protein_coding
ENSG00000103351.12	-0.0017738	0.000587443	-3.01953	0.00253165	0.0381382	0.998771	CLUAP1	protein_coding
ENSG00000260816.2	-0.00342506	0.00113454	-3.0189	0.00253693	0.0381581	0.997629	AC027279.1	sense_intronic
ENSG00000237753.1	-0.00254582	0.00084323	-3.01912	0.00253507	0.0381581	0.998237	FLJ42351	lincRNA
ENSG00000269952.1	0.00308749	0.00102271	3.01892	0.00253675	0.0381581	1.00214	AL117336.2	sense_intronic
ENSG00000120800.4	-0.00165606	0.00054862	-3.01858	0.0025396	0.0381785	0.998853	UTP20	protein_coding
ENSG00000177191.2	0.00366065	0.00121339	3.01688	0.00255393	0.038306	1.00254	B3GNT8	protein_coding
ENSG00000284873.1	0.00144638	0.000479434	3.01685	0.00255413	0.038306	1.001	OOSP1	protein_coding
ENSG00000115091.11	0.0025707	0.000852099	3.0169	0.00255375	0.038306	1.00178	ACTR3	protein_coding
ENSG00000215032.2	-0.00488037	0.00161774	-3.01679	0.00255468	0.038306	0.996623	GNL3LP1	processed_pseudogene
ENSG00000179562.2	0.00200893	0.000665916	3.01679	0.0025547	0.038306	1.00139	GCC1	protein_coding
ENSG00000164715.5	0.00292935	0.000971085	3.01658	0.00255646	0.0383125	1.00203	LMTK2	protein_coding
ENSG00000269194.1	0.00367735	0.00121922	3.01614	0.00256014	0.0383477	1.00255	AC006942.1	antisense
ENSG00000163754.17	0.00251149	0.000832882	3.01541	0.00256628	0.0384199	1.00174	GYG1	protein_coding
ENSG00000272529.1	-0.00385339	0.0012781	-3.01493	0.00257041	0.0384432	0.997333	AC090948.3	antisense
ENSG00000106771.12	-0.00218069	0.0007233	-3.01492	0.00257049	0.0384432	0.99849	TMEM245	protein_coding
ENSG00000238090.1	-0.0029382	0.000974818	-3.01411	0.00257737	0.038526	0.997965	AC006195.1	processed_pseudogene
ENSG00000165886.4	0.00352388	0.00116949	3.01319	0.00258521	0.0386233	1.00245	UBTD1	protein_coding
ENSG00000180815.14	0.00449741	0.00149299	3.01235	0.00259231	0.0386812	1.00312	MAP3K15	protein_coding
ENSG00000272361.2	-0.0017276	0.000573496	-3.01241	0.00259186	0.0386812	0.998803	AC005014.2	lincRNA
ENSG00000226975.1	0.00658196	0.00218505	3.01226	0.00259309	0.0386812	1.00457	AC006987.1	unprocessed_pseudogene
ENSG00000092020.10	0.00350685	0.00116439	3.01176	0.00259741	0.0387257	1.00243	PPP2R3C	protein_coding
ENSG00000245937.7	-0.00225998	0.000750495	-3.01132	0.00260115	0.0387415	0.998435	LINC01184	lincRNA
ENSG00000104388.14	0.0025946	0.0008616	3.01138	0.00260063	0.0387415	1.0018	RAB2A	protein_coding
ENSG00000119820.10	0.00194846	0.000647157	3.0108	0.00260558	0.0387675	1.00135	YIPF4	protein_coding
ENSG00000232479.2	-0.00271802	0.000902726	-3.0109	0.00260474	0.0387675	0.998118	AC010900.1	processed_pseudogene
ENSG00000274523.4	-0.00181345	0.00060246	-3.01007	0.00261185	0.0388408	0.998744	RCC1L	protein_coding
ENSG00000270120.1	0.00440205	0.0014626	3.00974	0.00261475	0.038864	1.00306	AC007728.3	sense_intronic
ENSG00000264801.1	-0.00329013	0.00109341	-3.00905	0.00262067	0.0389321	0.997722	ERVFRD-3	transcribed_processed_pseudogene
ENSG00000163681.14	0.00168067	0.000558673	3.00833	0.00262687	0.0390041	1.00117	SLMAP	protein_coding
ENSG00000205155.7	0.00245549	0.000816389	3.00775	0.00263192	0.039039	1.0017	PSENEN	protein_coding
ENSG00000254860.5	-0.00295268	0.000981651	-3.00787	0.00263082	0.039039	0.997955	TMEM9B-AS1	antisense
ENSG00000100296.13	0.00229674	0.000763692	3.00741	0.00263481	0.0390619	1.00159	THOC5	protein_coding
ENSG00000261072.2	-0.00291378	0.000969166	-3.00648	0.00264291	0.0391618	0.997982	AC084783.1	processed_pseudogene
ENSG00000111684.10	0.00238842	0.000794529	3.00608	0.00264639	0.039178	1.00166	LPCAT3	protein_coding
ENSG00000154710.17	0.00163705	0.000544587	3.00604	0.00264671	0.039178	1.00114	RABGEF1	protein_coding
ENSG00000186654.20	-0.00281612	0.000936896	-3.00579	0.00264888	0.0391901	0.99805	PRR5	protein_coding
ENSG00000279155.1	0.00338938	0.00112778	3.00535	0.00265278	0.0392078	1.00235	AC233300.1	TEC
ENSG00000226396.1	-0.00227284	0.00075623	-3.00548	0.00265159	0.0392078	0.998426	AL031727.1	processed_pseudogene
ENSG00000271857.1	0.00313398	0.00104297	3.00485	0.00265715	0.0392523	1.00217	AL096865.1	antisense
ENSG00000130779.20	0.00148364	0.000493777	3.00467	0.00265866	0.0392546	1.00103	CLIP1	protein_coding
ENSG00000183023.18	0.00339731	0.00113101	3.00379	0.0026664	0.0393487	1.00236	SLC8A1	protein_coding
ENSG00000230489.1	-0.00460407	0.001533	-3.00331	0.00267063	0.0393711	0.996814	VAV3-AS1	antisense
ENSG00000198399.14	0.0020611	0.000686251	3.00342	0.00266967	0.0393711	1.00143	ITSN2	protein_coding
ENSG00000147459.17	0.00341917	0.0011387	3.0027	0.00267596	0.0394296	1.00237	DOCK5	protein_coding
ENSG00000100284.20	0.00270487	0.000901028	3.00198	0.00268226	0.0395022	1.00188	TOM1	protein_coding
ENSG00000180347.13	0.00443547	0.00147803	3.00093	0.00269152	0.0395984	1.00308	ITPRID1	protein_coding
ENSG00000158856.18	-0.00661033	0.00220268	-3.00104	0.00269057	0.0395984	0.995429	DMTN	protein_coding
ENSG00000140995.16	0.00290246	0.000967258	3.00071	0.00269354	0.0396079	1.00201	DEF8	protein_coding
ENSG00000102145.13	-0.00578593	0.00192834	-3.00047	0.00269567	0.0396129	0.995998	GATA1	protein_coding
ENSG00000226337.3	0.00527891	0.00175943	3.00036	0.00269662	0.0396129	1.00367	AL353616.2	lincRNA
ENSG00000200999.1	-0.00352814	0.00117608	-2.99991	0.00270062	0.0396516	0.997557	RF00284	snoRNA
ENSG00000113580.14	0.00233432	0.000778223	2.99955	0.0027038	0.0396781	1.00162	NR3C1	protein_coding
ENSG00000237429.1	-0.00433222	0.00144511	-2.99785	0.00271889	0.039839	0.997002	BX293535.1	antisense
ENSG00000008130.15	0.00346951	0.00115723	2.99812	0.00271651	0.039839	1.00241	NADK	protein_coding
ENSG00000239466.3	0.00475522	0.00158619	2.99789	0.0027186	0.039839	1.0033	RN7SL552P	misc_RNA
ENSG00000107611.15	-0.00293564	0.000979422	-2.99732	0.00272366	0.0398684	0.997967	CUBN	protein_coding
ENSG00000104320.13	0.00347359	0.00115885	2.99743	0.00272262	0.0398684	1.00241	NBN	protein_coding
ENSG00000143669.13	0.00265318	0.00088535	2.99676	0.00272867	0.0399216	1.00184	LYST	protein_coding
ENSG00000266017.1	0.0045379	0.00151497	2.99538	0.00274106	0.0400827	1.00315	MIR4477B	miRNA
ENSG00000269069.1	-0.00312063	0.00104189	-2.99517	0.00274293	0.0400898	0.997839	AC007842.1	processed_pseudogene
ENSG00000011600.11	0.00318513	0.00106357	2.99476	0.00274664	0.0401042	1.00221	TYROBP	protein_coding
ENSG00000143416.20	-0.00704413	0.00235216	-2.99475	0.0027467	0.0401042	0.995129	SELENBP1	protein_coding
ENSG00000106479.10	-0.00189597	0.000633177	-2.99437	0.00275014	0.0401344	0.998687	ZNF862	protein_coding
ENSG00000169184.5	0.010958	0.00366133	2.9929	0.00276345	0.0403082	1.00762	MN1	protein_coding
ENSG00000127362.2	-0.00338367	0.00113069	-2.99258	0.00276633	0.0403299	0.997657	TAS2R3	protein_coding
ENSG00000164828.17	-0.00203379	0.000679696	-2.99221	0.0027697	0.0403587	0.998591	SUN1	protein_coding
ENSG00000100055.20	0.00255034	0.00085243	2.99185	0.00277291	0.0403851	1.00177	CYTH4	protein_coding
ENSG00000177173.5	0.00291675	0.000975185	2.99096	0.00278098	0.0404823	1.00202	NAP1L4P1	processed_pseudogene
ENSG00000101457.12	0.00292731	0.000978773	2.99079	0.00278253	0.0404845	1.00203	DNTTIP1	protein_coding
ENSG00000252050.1	0.00457649	0.00153063	2.98993	0.00279041	0.0405765	1.00318	RF00322	snoRNA
ENSG00000002834.17	0.00289525	0.000968386	2.98977	0.00279191	0.0405765	1.00201	LASP1	protein_coding
ENSG00000187554.12	0.00375759	0.00125687	2.98964	0.00279306	0.0405765	1.00261	TLR5	protein_coding
ENSG00000285861.1	0.00349733	0.0011699	2.98943	0.00279502	0.0405846	1.00243	AC026991.2	antisense
ENSG00000267546.2	0.00258569	0.000865118	2.98884	0.00280043	0.0406224	1.00179	AC015802.4	antisense
ENSG00000167671.11	-0.00572414	0.00191508	-2.98897	0.00279916	0.0406224	0.99604	UBXN6	protein_coding
ENSG00000105520.10	0.00415664	0.00139109	2.98805	0.0028076	0.040706	1.00289	PLPPR2	protein_coding
ENSG00000116514.16	0.00288134	0.00096461	2.98705	0.00281681	0.040819	1.002	RNF19B	protein_coding
ENSG00000281379.2	0.00347967	0.0011654	2.98581	0.00282829	0.0408627	1.00241	SEPT14P19	transcribed_unprocessed_pseudogene
ENSG00000101158.13	-0.00178595	0.000598033	-2.98637	0.00282307	0.0408627	0.998763	NELFCD	protein_coding
[truncated: 237 more rows]

## Sheet: PDBF_UPDRS_DE
	log2FoldChange	lfcSE	stat	pvalue	padj	FoldChange	symbol	geneType
ENSG00000138411.12	0.00756106	0.000978583	7.72654	1.10506e-14	3.18688e-10	1.00525	HECW2	protein_coding
ENSG00000198671.3	0.00527244	0.000701668	7.51416	5.72766e-14	8.259e-10	1.00366	AC135895.1	antisense
ENSG00000145491.11	0.00668212	0.000942853	7.08712	1.3693e-12	1.31631e-08	1.00464	ROPN1L	protein_coding
ENSG00000188895.11	0.0045832	0.000666057	6.88109	5.93972e-12	4.28239e-08	1.00318	MSL1	protein_coding
ENSG00000223969.5	0.00758804	0.00113171	6.70495	2.01479e-11	1.16209e-07	1.00527	AC002456.1	antisense
ENSG00000198736.11	0.0059375	0.000909085	6.53129	6.52037e-11	1.72361e-07	1.00412	MSRB1	protein_coding
ENSG00000284882.1	0.00560706	0.00085768	6.53747	6.25695e-11	1.72361e-07	1.00389	AL359762.1	bidirectional_promoter_lncRNA
ENSG00000177125.5	0.00424107	0.000645948	6.56566	5.18029e-11	1.72361e-07	1.00294	ZBTB34	protein_coding
ENSG00000135378.3	0.00639251	0.000978937	6.53006	6.57434e-11	1.72361e-07	1.00444	PRRG4	protein_coding
ENSG00000181016.9	0.00621668	0.000939178	6.61928	3.60956e-11	1.72361e-07	1.00432	LSMEM1	protein_coding
ENSG00000206344.7	0.0055656	0.000851612	6.53536	6.34554e-11	1.72361e-07	1.00387	HCG27	lincRNA
ENSG00000002919.14	0.0037869	0.000587092	6.45026	1.11658e-10	2.68342e-07	1.00263	SNX11	protein_coding
ENSG00000003402.19	0.00347139	0.000540971	6.41697	1.39012e-10	3.08382e-07	1.00241	CFLAR	protein_coding
ENSG00000152213.3	0.00420523	0.000658637	6.38474	1.71687e-10	3.53663e-07	1.00292	ARL11	protein_coding
ENSG00000236345.1	0.00557863	0.000876138	6.3673	1.9239e-10	3.55303e-07	1.00387	AL354719.2	antisense
ENSG00000170837.2	0.00661973	0.00104025	6.36357	1.97123e-10	3.55303e-07	1.0046	GPR27	protein_coding
ENSG00000173110.7	0.00579188	0.000914363	6.33433	2.38372e-10	4.04377e-07	1.00402	HSPA6	protein_coding
ENSG00000189134.3	0.00687591	0.00109285	6.2917	3.14017e-10	4.59629e-07	1.00478	NKAPL	protein_coding
ENSG00000219150.2	0.00499311	0.000793897	6.28937	3.18755e-10	4.59629e-07	1.00347	AL603914.1	processed_pseudogene
ENSG00000155099.7	0.00507415	0.000805157	6.30206	2.93719e-10	4.59629e-07	1.00352	PIP4P2	protein_coding
ENSG00000142166.12	0.00362193	0.000577646	6.27015	3.60692e-10	4.95334e-07	1.00251	IFNAR1	protein_coding
ENSG00000180953.11	0.00515214	0.000823184	6.2588	3.87959e-10	5.08562e-07	1.00358	ST20	protein_coding
ENSG00000143226.13	0.00530164	0.000854355	6.20543	5.45484e-10	6.83966e-07	1.00368	FCGR2A	protein_coding
ENSG00000257878.1	0.00663886	0.00107113	6.19799	5.71884e-10	6.8719e-07	1.00461	AC007298.2	antisense
ENSG00000140044.12	0.00470443	0.000761137	6.1808	6.37789e-10	7.35728e-07	1.00327	JDP2	protein_coding
ENSG00000255801.1	0.00832712	0.00134904	6.17262	6.71674e-10	7.45016e-07	1.00579	AC092746.1	lincRNA
ENSG00000228242.6	0.00571366	0.000932104	6.12985	8.79638e-10	9.16556e-07	1.00397	AC093495.1	antisense
ENSG00000214812.3	0.0068683	0.00112087	6.12764	8.91937e-10	9.16556e-07	1.00477	AL137792.1	processed_pseudogene
ENSG00000174529.7	0.00165644	0.000270554	6.12239	9.2182e-10	9.16556e-07	1.00115	TMEM81	protein_coding
ENSG00000175029.16	0.00303793	0.000496637	6.11701	9.53454e-10	9.16556e-07	1.00211	CTBP2	protein_coding
ENSG00000197208.5	0.00579937	0.000950522	6.10125	1.05243e-09	9.48467e-07	1.00403	SLC22A4	protein_coding
ENSG00000173281.4	0.00537504	0.000880544	6.10423	1.03301e-09	9.48467e-07	1.00373	PPP1R3B	protein_coding
ENSG00000148572.15	0.0047737	0.000784089	6.0882	1.14186e-09	9.97881e-07	1.00331	NRBF2	protein_coding
ENSG00000196668.3	0.00560584	0.000923051	6.07317	1.25411e-09	1.0298e-06	1.00389	LINC00173	processed_transcript
ENSG00000198053.11	0.00553922	0.000912656	6.06934	1.28434e-09	1.0298e-06	1.00385	SIRPA	protein_coding
ENSG00000120709.10	0.00496369	0.000817849	6.0692	1.28551e-09	1.0298e-06	1.00345	FAM53C	protein_coding
ENSG00000174130.12	0.00452362	0.000746205	6.06217	1.34299e-09	1.04677e-06	1.00314	TLR6	protein_coding
ENSG00000259332.3	0.00493456	0.000816044	6.04692	1.47637e-09	1.12045e-06	1.00343	ST20-MTHFS	protein_coding
ENSG00000139946.9	0.00410522	0.000679374	6.04265	1.51607e-09	1.12108e-06	1.00285	PELI2	protein_coding
ENSG00000134830.5	0.00473488	0.000784842	6.03291	1.6103e-09	1.16099e-06	1.00329	C5AR2	protein_coding
ENSG00000278600.1	0.00426283	0.00070783	6.0224	1.71849e-09	1.18241e-06	1.00296	AC015871.3	sense_intronic
ENSG00000126883.16	0.00302471	0.00050227	6.02207	1.72201e-09	1.18241e-06	1.0021	NUP214	protein_coding
ENSG00000225873.4	0.00637208	0.00105926	6.01559	1.79236e-09	1.20209e-06	1.00443	C3orf86	transcribed_unitary_pseudogene
ENSG00000135083.15	0.00631924	0.001054	5.99551	2.02851e-09	1.32955e-06	1.00439	CCNJL	protein_coding
ENSG00000272953.1	0.00557573	0.000932934	5.97656	2.27905e-09	1.45552e-06	1.00387	AC092171.4	lincRNA
ENSG00000243646.9	0.00344427	0.000576588	5.97354	2.32165e-09	1.45552e-06	1.00239	IL10RB	protein_coding
ENSG00000182195.7	-0.00677369	0.00114016	-5.94102	2.83247e-09	1.51924e-06	0.995316	LDOC1	protein_coding
ENSG00000169180.11	0.00446288	0.000749323	5.95587	2.58684e-09	1.51924e-06	1.0031	XPO6	protein_coding
ENSG00000155744.9	0.00519248	0.000872991	5.94792	2.71576e-09	1.51924e-06	1.00361	FAM126B	protein_coding
ENSG00000226842.1	0.00508558	0.000856113	5.94032	2.84473e-09	1.51924e-06	1.00353	AL158834.1	antisense
ENSG00000244617.2	0.0071081	0.00119642	5.94116	2.83016e-09	1.51924e-06	1.00494	ASPRV1	protein_coding
ENSG00000084110.10	0.00538553	0.00090402	5.95731	2.56424e-09	1.51924e-06	1.00374	HAL	protein_coding
ENSG00000150457.8	0.00342472	0.000575535	5.9505	2.67326e-09	1.51924e-06	1.00238	LATS2	protein_coding
ENSG00000165879.8	0.00505238	0.00085036	5.94146	2.825e-09	1.51924e-06	1.00351	FRAT1	protein_coding
ENSG00000011600.11	0.00474893	0.000802445	5.91808	3.25722e-09	1.70791e-06	1.0033	TYROBP	protein_coding
ENSG00000115590.13	0.00669113	0.00113124	5.91487	3.32137e-09	1.71045e-06	1.00465	IL1R2	protein_coding
ENSG00000166900.16	0.00471961	0.000798746	5.90877	3.44672e-09	1.74386e-06	1.00328	STX3	protein_coding
ENSG00000246263.2	0.00494575	0.000837536	5.90512	3.5239e-09	1.75217e-06	1.00343	UBR5-AS1	antisense
ENSG00000181274.6	0.00521651	0.00088384	5.9021	3.58908e-09	1.75433e-06	1.00362	FRAT2	protein_coding
ENSG00000151948.11	0.00510421	0.000868449	5.87739	4.16784e-09	2.00327e-06	1.00354	GLT1D1	protein_coding
ENSG00000163393.12	0.00466574	0.000795147	5.86777	4.41687e-09	2.08817e-06	1.00324	SLC22A15	protein_coding
ENSG00000175938.6	0.0033059	0.000563758	5.86404	4.51746e-09	2.10127e-06	1.00229	ORAI3	protein_coding
ENSG00000247624.6	0.00334833	0.000571263	5.86127	4.59333e-09	2.10265e-06	1.00232	CPEB2-DT	lincRNA
ENSG00000064225.12	0.00424399	0.000724472	5.85805	4.6834e-09	2.11039e-06	1.00295	ST3GAL6	protein_coding
ENSG00000006327.13	0.00551992	0.000943082	5.85306	4.82614e-09	2.12296e-06	1.00383	TNFRSF12A	protein_coding
ENSG00000182923.17	0.00376713	0.00064374	5.85195	4.85853e-09	2.12296e-06	1.00261	CEP63	protein_coding
ENSG00000170836.11	0.00189046	0.000325162	5.81391	6.10296e-09	2.51433e-06	1.00131	PPM1D	protein_coding
ENSG00000172349.17	0.00300006	0.000515833	5.81595	6.02901e-09	2.51433e-06	1.00208	IL16	protein_coding
ENSG00000174132.8	0.00520201	0.000893851	5.81977	5.89275e-09	2.51433e-06	1.00361	FAM174A	protein_coding
ENSG00000238160.1	0.00538513	0.000925571	5.81818	5.94926e-09	2.51433e-06	1.00374	AC116366.2	antisense
ENSG00000164938.13	0.00401414	0.00069076	5.81119	6.20306e-09	2.51958e-06	1.00279	TP53INP1	protein_coding
ENSG00000196083.9	0.0052451	0.000904196	5.80084	6.59825e-09	2.59822e-06	1.00364	IL1RAP	protein_coding
ENSG00000175538.10	0.00455747	0.000785892	5.79911	6.66696e-09	2.59822e-06	1.00316	KCNE3	protein_coding
ENSG00000173559.12	0.0042494	0.000732753	5.79923	6.66219e-09	2.59822e-06	1.00295	NABP1	protein_coding
ENSG00000059728.10	0.00498166	0.000859697	5.79467	6.84544e-09	2.63221e-06	1.00346	MXD1	protein_coding
ENSG00000086730.16	0.00428494	0.000740003	5.79043	7.02068e-09	2.66407e-06	1.00297	LAT2	protein_coding
ENSG00000067082.14	0.00300647	0.000520131	5.78021	7.46057e-09	2.79423e-06	1.00209	KLF6	protein_coding
ENSG00000285693.1	0.00444587	0.000770043	5.77353	7.76282e-09	2.80524e-06	1.00309	AP002381.2	lincRNA
ENSG00000154928.17	0.00511266	0.000885597	5.77312	7.78179e-09	2.80524e-06	1.00355	EPHB1	protein_coding
ENSG00000176749.8	0.00557415	0.000965148	5.77543	7.67548e-09	2.80524e-06	1.00387	CDK5R1	protein_coding
ENSG00000259415.1	0.00248755	0.000431961	5.75874	8.47437e-09	2.98039e-06	1.00173	AC012291.1	sense_intronic
ENSG00000235119.1	0.00316148	0.000548842	5.76027	8.39796e-09	2.98039e-06	1.00219	AL138895.1	lincRNA
ENSG00000279811.1	0.00440564	0.00076532	5.7566	8.58274e-09	2.98214e-06	1.00306	AC093330.2	TEC
ENSG00000087589.16	0.00415335	0.000722652	5.74737	9.06418e-09	3.11193e-06	1.00288	CASS4	protein_coding
ENSG00000135766.8	0.00446035	0.000777286	5.73837	9.55929e-09	3.2433e-06	1.0031	EGLN1	protein_coding
ENSG00000136404.15	0.00437617	0.000763528	5.73151	9.95401e-09	3.33795e-06	1.00304	TM6SF1	protein_coding
ENSG00000142046.14	0.00444034	0.000775991	5.72215	1.05183e-08	3.44701e-06	1.00308	TMEM91	protein_coding
ENSG00000215114.8	0.00381572	0.00066673	5.72303	1.04638e-08	3.44701e-06	1.00265	UBXN2B	protein_coding
ENSG00000125735.10	0.00411174	0.000719506	5.71467	1.09918e-08	3.52212e-06	1.00285	TNFSF14	protein_coding
ENSG00000230257.2	0.00702709	0.00122949	5.71546	1.09405e-08	3.52212e-06	1.00488	NFE4	protein_coding
ENSG00000250616.2	0.00587243	0.00103095	5.69614	1.22552e-08	3.88381e-06	1.00408	AC012645.1	antisense
ENSG00000113719.15	0.00439915	0.00077284	5.69218	1.25424e-08	3.93164e-06	1.00305	ERGIC1	protein_coding
ENSG00000163464.7	0.00579974	0.00101974	5.6875	1.28916e-08	3.97782e-06	1.00403	CXCR1	protein_coding
ENSG00000163694.14	0.00465917	0.000819336	5.68652	1.29656e-08	3.97782e-06	1.00323	RBM47	protein_coding
ENSG00000072401.14	0.00602304	0.00106078	5.67792	1.36345e-08	4.0959e-06	1.00418	UBE2D1	protein_coding
ENSG00000204160.11	0.00476465	0.000839001	5.67896	1.35516e-08	4.0959e-06	1.00331	ZDHHC18	protein_coding
ENSG00000117151.12	0.00426236	0.00075122	5.67391	1.39572e-08	4.14961e-06	1.00296	CTBS	protein_coding
ENSG00000171051.8	0.00586458	0.00103622	5.65958	1.51743e-08	4.42787e-06	1.00407	FPR1	protein_coding
ENSG00000131389.17	0.00438035	0.00077415	5.65827	1.52902e-08	4.42787e-06	1.00304	SLC6A6	protein_coding
ENSG00000197329.11	0.00437468	0.000773245	5.65756	1.53537e-08	4.42787e-06	1.00304	PELI1	protein_coding
ENSG00000239407.5	-0.00241504	0.000427443	-5.64997	1.60472e-08	4.58203e-06	0.998327	Z68871.1	lincRNA
ENSG00000223878.1	0.00420762	0.000745601	5.64326	1.66865e-08	4.71785e-06	1.00292	PPIAP53	processed_pseudogene
ENSG00000136630.12	0.00539286	0.000957104	5.63457	1.75501e-08	4.91384e-06	1.00375	HLX	protein_coding
ENSG00000249662.6	0.00612136	0.00108689	5.63202	1.78108e-08	4.93891e-06	1.00425	LINC02218	protein_coding
ENSG00000072694.20	0.00438697	0.000779368	5.62888	1.81385e-08	4.98186e-06	1.00305	FCGR2B	protein_coding
ENSG00000128594.7	0.00532566	0.00094733	5.62176	1.89026e-08	5.14276e-06	1.0037	LRRC4	protein_coding
ENSG00000170892.10	0.0046251	0.00082423	5.61142	2.0067e-08	5.26102e-06	1.00321	TSEN34	protein_coding
ENSG00000109466.13	0.00442955	0.000789279	5.61215	1.99833e-08	5.26102e-06	1.00308	KLHL2	protein_coding
ENSG00000162413.16	0.00403567	0.000719073	5.61232	1.9963e-08	5.26102e-06	1.0028	KLHL21	protein_coding
ENSG00000153179.12	0.00334417	0.000595479	5.61595	1.95491e-08	5.26102e-06	1.00232	RASSF3	protein_coding
ENSG00000231047.1	0.00539538	0.000963745	5.59835	2.164e-08	5.62231e-06	1.00375	GCNT1P3	processed_pseudogene
ENSG00000104549.11	-0.00445951	0.000797903	-5.58904	2.28324e-08	5.87915e-06	0.996914	SQLE	protein_coding
ENSG00000132155.11	0.00335919	0.000601211	5.58737	2.30531e-08	5.88345e-06	1.00233	RAF1	protein_coding
ENSG00000117410.13	0.00442802	0.000795004	5.56981	2.55021e-08	6.45137e-06	1.00307	ATP6V0B	protein_coding
ENSG00000101265.15	0.00413686	0.000744637	5.55555	2.76744e-08	6.88019e-06	1.00287	RASSF2	protein_coding
ENSG00000163421.8	0.00652999	0.00117515	5.5567	2.74917e-08	6.88019e-06	1.00454	PROK2	protein_coding
ENSG00000103569.9	0.00542932	0.000978492	5.54866	2.87869e-08	7.0956e-06	1.00377	AQP9	protein_coding
ENSG00000136156.13	0.00409985	0.000739625	5.54315	2.97078e-08	7.19953e-06	1.00285	ITM2B	protein_coding
ENSG00000140199.11	0.00339136	0.000611706	5.54411	2.95461e-08	7.19953e-06	1.00235	SLC12A6	protein_coding
ENSG00000238005.2	0.00582639	0.00105214	5.53766	3.06532e-08	7.36674e-06	1.00405	AL391832.2	lincRNA
ENSG00000115271.10	0.00588881	0.00106417	5.53369	3.13562e-08	7.4734e-06	1.00409	GCA	protein_coding
ENSG00000158156.7	0.00480624	0.000868898	5.53142	3.17644e-08	7.50864e-06	1.00334	XKR8	protein_coding
ENSG00000256533.1	-0.00296968	0.000537274	-5.5273	3.2519e-08	7.6245e-06	0.997944	AP002373.2	processed_pseudogene
ENSG00000138185.19	0.00390817	0.000707282	5.52562	3.28333e-08	7.63612e-06	1.00271	ENTPD1	protein_coding
ENSG00000224610.1	-0.0132893	0.00240669	-5.52182	3.35507e-08	7.74055e-06	0.990831	AC108879.1	lincRNA
ENSG00000171700.13	0.00357817	0.000650647	5.49941	3.81072e-08	8.72202e-06	1.00248	RGS19	protein_coding
ENSG00000159128.14	0.00387973	0.000706141	5.49426	3.92342e-08	8.90925e-06	1.00269	IFNGR2	protein_coding
ENSG00000137462.7	0.0048422	0.000882904	5.4844	4.14878e-08	9.3474e-06	1.00336	TLR2	protein_coding
ENSG00000239823.2	0.00450417	0.000821862	5.48045	4.24247e-08	9.36333e-06	1.00313	RF00019	misc_RNA
ENSG00000233060.1	0.00406002	0.000740879	5.48	4.25325e-08	9.36333e-06	1.00282	AC016700.3	lincRNA
ENSG00000268170.2	0.00639878	0.00116711	5.48258	4.19156e-08	9.36333e-06	1.00445	AC073342.2	antisense
ENSG00000087074.7	0.00478877	0.000874156	5.47817	4.29751e-08	9.38909e-06	1.00332	PPP1R15A	protein_coding
ENSG00000116991.10	0.00626734	0.00114464	5.47538	4.36576e-08	9.46649e-06	1.00435	SIPA1L2	protein_coding
ENSG00000100439.10	0.00353969	0.000647758	5.46454	4.64118e-08	9.98859e-06	1.00246	ABHD4	protein_coding
ENSG00000157514.16	0.00484988	0.000887859	5.46244	4.69631e-08	1.00324e-05	1.00337	TSC22D3	protein_coding
ENSG00000211764.1	-0.00399185	0.000731202	-5.4593	4.78019e-08	1.01365e-05	0.997237	TRBJ2-1	TR_J_gene
ENSG00000111058.7	0.0056162	0.00103081	5.44836	5.08365e-08	1.05473e-05	1.0039	ACSS3	protein_coding
ENSG00000130449.5	0.00263435	0.000483416	5.44945	5.05264e-08	1.05473e-05	1.00183	ZSWIM6	protein_coding
ENSG00000106348.17	0.00445138	0.000816915	5.44901	5.06516e-08	1.05473e-05	1.00309	IMPDH1	protein_coding
ENSG00000163162.8	0.00407478	0.000748156	5.44643	5.13895e-08	1.05859e-05	1.00283	RNF149	protein_coding
ENSG00000172765.17	0.00377651	0.000694263	5.4396	5.34014e-08	1.09223e-05	1.00262	TMCC1	protein_coding
ENSG00000109743.10	0.00411485	0.000757301	5.43357	5.52364e-08	1.1218e-05	1.00286	BST1	protein_coding
ENSG00000062716.12	0.00375846	0.000691871	5.43232	5.56265e-08	1.12183e-05	1.00261	VMP1	protein_coding
ENSG00000062282.14	0.00527079	0.000970625	5.43031	5.62576e-08	1.1227e-05	1.00366	DGAT2	protein_coding
ENSG00000113269.13	0.00367226	0.000676329	5.4297	5.64485e-08	1.1227e-05	1.00255	RNF130	protein_coding
ENSG00000148841.16	0.00413647	0.000762215	5.4269	5.73407e-08	1.13264e-05	1.00287	ITPRIP	protein_coding
ENSG00000160785.13	0.00336426	0.000620253	5.42402	5.8273e-08	1.14322e-05	1.00233	SLC25A44	protein_coding
ENSG00000116954.7	0.00214329	0.000395362	5.42107	5.92439e-08	1.15442e-05	1.00149	RRAGC	protein_coding
ENSG00000226501.2	0.0043458	0.000802192	5.41741	6.04697e-08	1.15489e-05	1.00302	USF1P1	processed_pseudogene
ENSG00000154165.4	-0.010874	0.00200685	-5.41844	6.012e-08	1.15489e-05	0.992491	GPR15	protein_coding
ENSG00000163191.5	0.00478449	0.000883085	5.41793	6.02924e-08	1.15489e-05	1.00332	S100A11	protein_coding
ENSG00000108179.13	0.0034974	0.000646836	5.40693	6.41132e-08	1.21642e-05	1.00243	PPIF	protein_coding
ENSG00000225639.1	0.00397377	0.000735581	5.40222	6.58221e-08	1.24068e-05	1.00276	PGAM1P2	processed_pseudogene
ENSG00000011198.9	0.00502864	0.00093342	5.38733	7.15124e-08	1.33919e-05	1.00349	ABHD5	protein_coding
ENSG00000131724.10	0.00443345	0.000824033	5.38018	7.44104e-08	1.38447e-05	1.00308	IL13RA1	protein_coding
ENSG00000234235.1	0.00346653	0.000644543	5.37828	7.5202e-08	1.39022e-05	1.00241	BOK-AS1	antisense
ENSG00000274357.1	0.00520233	0.000967686	5.37605	7.61387e-08	1.39858e-05	1.00361	RF00017	misc_RNA
ENSG00000100368.13	0.00477608	0.000890144	5.36552	8.07177e-08	1.46404e-05	1.00332	CSF2RB	protein_coding
ENSG00000284930.1	0.00497112	0.000926381	5.36617	8.04246e-08	1.46404e-05	1.00345	AC005280.2	lincRNA
ENSG00000166523.7	0.00621653	0.00116232	5.34838	8.87442e-08	1.59956e-05	1.00432	CLEC4E	protein_coding
ENSG00000217128.11	0.003478	0.000650476	5.34686	8.9494e-08	1.60305e-05	1.00241	FNIP1	protein_coding
ENSG00000260621.1	0.00494959	0.000926299	5.34341	9.12152e-08	1.6238e-05	1.00344	AC092140.1	antisense
ENSG00000261055.1	0.00703214	0.00131666	5.34088	9.2497e-08	1.63652e-05	1.00489	AL450468.2	lincRNA
ENSG00000256706.1	0.00482197	0.000903351	5.33786	9.40475e-08	1.64922e-05	1.00335	AC005342.2	antisense
ENSG00000131844.15	-0.00218545	0.000409471	-5.33727	9.4359e-08	1.64922e-05	0.998486	MCCC2	protein_coding
ENSG00000134873.9	0.00480688	0.000901319	5.33316	9.65203e-08	1.67684e-05	1.00334	CLDN10	protein_coding
ENSG00000143067.4	0.00427504	0.000801994	5.33051	9.79365e-08	1.69125e-05	1.00297	ZNF697	protein_coding
ENSG00000173535.14	0.00509514	0.000956531	5.32669	1.00017e-07	1.7169e-05	1.00354	TNFRSF10C	protein_coding
ENSG00000138463.8	0.00349426	0.000656144	5.32545	1.00703e-07	1.71845e-05	1.00242	DIRC2	protein_coding
ENSG00000258215.1	0.00526395	0.000989304	5.32086	1.03276e-07	1.75199e-05	1.00366	AC078886.1	processed_pseudogene
ENSG00000183621.15	0.00417833	0.000785836	5.31705	1.05462e-07	1.77861e-05	1.0029	ZNF438	protein_coding
ENSG00000127954.12	0.00534843	0.00100627	5.31513	1.06584e-07	1.78707e-05	1.00371	STEAP4	protein_coding
ENSG00000258082.1	0.00496418	0.000935261	5.3078	1.10955e-07	1.84962e-05	1.00345	AL391832.3	lincRNA
ENSG00000130856.16	-0.00202134	0.000381263	-5.30169	1.14735e-07	1.86656e-05	0.9986	ZNF236	protein_coding
ENSG00000217275.2	0.00800918	0.00151087	5.30104	1.15143e-07	1.86656e-05	1.00557	AL031777.1	processed_pseudogene
ENSG00000107341.4	0.00317674	0.000599265	5.30106	1.15135e-07	1.86656e-05	1.0022	UBE2R2	protein_coding
ENSG00000112561.17	0.00330019	0.000622534	5.30122	1.15034e-07	1.86656e-05	1.00229	TFEB	protein_coding
ENSG00000139370.11	0.0033483	0.000631642	5.30094	1.15208e-07	1.86656e-05	1.00232	SLC15A4	protein_coding
ENSG00000278869.1	0.0063209	0.00119271	5.29962	1.16046e-07	1.86963e-05	1.00439	BX539320.1	lincRNA
ENSG00000155657.26	-0.00579249	0.00109367	-5.29639	1.18114e-07	1.89238e-05	0.995993	TTN	protein_coding
ENSG00000112062.10	0.00372657	0.000704787	5.28751	1.23993e-07	1.9756e-05	1.00259	MAPK14	protein_coding
ENSG00000201470.1	-0.00413129	0.000782392	-5.28033	1.28954e-07	2.04335e-05	0.997141	RNY4P7	misc_RNA
ENSG00000197852.10	0.00476733	0.000903371	5.27726	1.31128e-07	2.06645e-05	1.00331	INKA2	protein_coding
ENSG00000113303.11	0.00568235	0.00107832	5.26963	1.36699e-07	2.14254e-05	1.00395	BTNL8	protein_coding
ENSG00000101150.17	0.00345857	0.000656558	5.26773	1.3812e-07	2.14928e-05	1.0024	TPD52L2	protein_coding
ENSG00000239998.5	0.00422501	0.000802392	5.26552	1.39794e-07	2.14928e-05	1.00293	LILRA2	protein_coding
ENSG00000134686.18	0.00570018	0.00108263	5.2651	1.4011e-07	2.14928e-05	1.00396	PHC2	protein_coding
ENSG00000127947.15	0.00290801	0.000552159	5.26662	1.38958e-07	2.14928e-05	1.00202	PTPN12	protein_coding
ENSG00000105722.9	0.00404338	0.00076917	5.25682	1.4657e-07	2.22512e-05	1.00281	ERF	protein_coding
ENSG00000168769.13	0.00327338	0.000622811	5.25582	1.47369e-07	2.22512e-05	1.00227	TET2	protein_coding
ENSG00000248323.6	0.00443367	0.000843474	5.25644	1.46868e-07	2.22512e-05	1.00308	LUCAT1	antisense
ENSG00000163235.15	0.00491902	0.000937194	5.24866	1.53206e-07	2.29666e-05	1.00342	TGFA	protein_coding
ENSG00000139890.9	0.00516746	0.00098464	5.24807	1.537e-07	2.29666e-05	1.00359	REM2	protein_coding
ENSG00000185950.8	0.00480244	0.000915552	5.2454	1.55943e-07	2.31816e-05	1.00333	IRS2	protein_coding
ENSG00000230578.3	0.00364767	0.00069631	5.23857	1.61828e-07	2.39331e-05	1.00253	AC234781.5	transcribed_unprocessed_pseudogene
ENSG00000181778.4	0.00686543	0.00131278	5.2297	1.69789e-07	2.49824e-05	1.00477	TMEM252	protein_coding
ENSG00000214293.8	0.00293356	0.000561152	5.22774	1.71591e-07	2.51193e-05	1.00204	APTR	lincRNA
ENSG00000154845.15	0.00386523	0.000740296	5.2212	1.7777e-07	2.58924e-05	1.00268	PPP4R1	protein_coding
ENSG00000277463.1	0.00412144	0.000789921	5.21754	1.81317e-07	2.62763e-05	1.00286	AC080038.2	lincRNA
ENSG00000276649.1	0.00452474	0.000867621	5.21511	1.83709e-07	2.64899e-05	1.00314	AL117335.1	antisense
ENSG00000165071.14	0.0035628	0.000683685	5.21117	1.8765e-07	2.69234e-05	1.00247	TMEM71	protein_coding
ENSG00000173757.9	0.00338885	0.000650419	5.21025	1.88583e-07	2.69234e-05	1.00235	STAT5B	protein_coding
ENSG00000254477.2	0.00435523	0.000836129	5.2088	1.90068e-07	2.69462e-05	1.00302	AP000640.1	processed_transcript
ENSG00000051620.10	0.00324276	0.000622725	5.20736	1.91545e-07	2.69462e-05	1.00225	HEBP2	protein_coding
ENSG00000270640.1	0.00464325	0.000891584	5.20787	1.91022e-07	2.69462e-05	1.00322	AC104695.3	sense_intronic
ENSG00000223819.2	0.0050083	0.00096228	5.20462	1.94393e-07	2.71815e-05	1.00348	PPIAP89	processed_pseudogene
ENSG00000106780.8	0.00425645	0.000817928	5.20394	1.95103e-07	2.71815e-05	1.00295	MEGF9	protein_coding
ENSG00000188315.7	0.00338692	0.000651271	5.20048	1.98779e-07	2.74286e-05	1.00235	C3orf62	protein_coding
ENSG00000006652.13	0.00442141	0.000850107	5.201	1.98217e-07	2.74286e-05	1.00307	IFRD1	protein_coding
ENSG00000252577.1	0.00441736	0.000850588	5.19329	2.06606e-07	2.83729e-05	1.00307	SCARNA20	scaRNA
ENSG00000175182.14	0.00278241	0.000535896	5.19207	2.0797e-07	2.84249e-05	1.00193	FAM131A	protein_coding
ENSG00000132825.6	0.00331667	0.000639452	5.18674	2.14009e-07	2.91123e-05	1.0023	PPP1R3D	protein_coding
ENSG00000134152.10	0.00386704	0.000745828	5.1849	2.16135e-07	2.92635e-05	1.00268	KATNBL1	protein_coding
ENSG00000103707.9	0.00191701	0.00036986	5.18306	2.1828e-07	2.92896e-05	1.00133	MTFMT	protein_coding
ENSG00000057704.12	0.00462799	0.00089344	5.17997	2.21926e-07	2.92896e-05	1.00321	TMCC3	protein_coding
ENSG00000137575.11	0.0043833	0.000845808	5.18238	2.19074e-07	2.92896e-05	1.00304	SDCBP	protein_coding
ENSG00000258476.5	0.00797142	0.00153833	5.18187	2.19678e-07	2.92896e-05	1.00554	LINC02207	lincRNA
ENSG00000197872.11	0.00307547	0.000593772	5.17955	2.22422e-07	2.92896e-05	1.00213	FAM49A	protein_coding
ENSG00000124731.12	0.00545667	0.00105335	5.18028	2.21555e-07	2.92896e-05	1.00379	TREM1	protein_coding
ENSG00000136040.8	0.00403893	0.000780284	5.17623	2.26418e-07	2.96803e-05	1.0028	PLXNC1	protein_coding
ENSG00000065615.13	0.00292654	0.000565537	5.1748	2.28155e-07	2.97727e-05	1.00203	CYB5R4	protein_coding
ENSG00000167434.9	0.00654311	0.00126481	5.17319	2.30126e-07	2.98947e-05	1.00455	CA4	protein_coding
ENSG00000244627.5	0.00235139	0.000454672	5.17162	2.32072e-07	3.00122e-05	1.00163	TPTEP2	transcribed_unprocessed_pseudogene
ENSG00000180871.7	0.00548777	0.00106234	5.16573	2.39496e-07	3.0834e-05	1.00381	CXCR2	protein_coding
ENSG00000088833.17	0.00341212	0.000660989	5.16214	2.44139e-07	3.12921e-05	1.00237	NSFL1C	protein_coding
ENSG00000172216.5	0.00420602	0.000815148	5.15982	2.47185e-07	3.13973e-05	1.00292	CEBPB	protein_coding
ENSG00000275601.1	-0.00343912	0.000666621	-5.15903	2.48226e-07	3.13973e-05	0.997619	AC011330.2	sense_intronic
ENSG00000104324.15	0.00343126	0.000664991	5.15986	2.47129e-07	3.13973e-05	1.00238	CPQ	protein_coding
ENSG00000171310.10	0.00310654	0.000602506	5.15603	2.52238e-07	3.17655e-05	1.00216	CHST11	protein_coding
ENSG00000198223.16	0.00386263	0.000749828	5.15136	2.5861e-07	3.205e-05	1.00268	CSF2RA	protein_coding
ENSG00000267365.1	0.00536618	0.00104192	5.15028	2.60092e-07	3.205e-05	1.00373	KCNJ2-AS1	antisense
ENSG00000111261.13	0.00480668	0.000933229	5.15059	2.59673e-07	3.205e-05	1.00334	MANSC1	protein_coding
ENSG00000163041.9	0.00406911	0.000789729	5.15255	2.56974e-07	3.205e-05	1.00282	H3F3A	protein_coding
ENSG00000116701.14	0.00408064	0.000792074	5.15184	2.57938e-07	3.205e-05	1.00283	NCF2	protein_coding
ENSG00000119669.4	0.00438638	0.000851805	5.14951	2.61165e-07	3.205e-05	1.00305	IRF2BPL	protein_coding
ENSG00000164713.9	0.00305999	0.000594369	5.1483	2.62852e-07	3.21203e-05	1.00212	BRI3	protein_coding
ENSG00000273253.2	0.00476342	0.000925902	5.14462	2.68056e-07	3.2342e-05	1.00331	AL022328.4	antisense
ENSG00000160179.18	0.00594881	0.001156	5.14601	2.66083e-07	3.2342e-05	1.00413	ABCG1	protein_coding
ENSG00000113532.12	0.00383632	0.000745806	5.14386	2.69152e-07	3.2342e-05	1.00266	ST8SIA4	protein_coding
ENSG00000176597.11	0.00489297	0.000951119	5.14444	2.68327e-07	3.2342e-05	1.0034	B3GNT5	protein_coding
ENSG00000257915.1	0.00485596	0.00094474	5.14	2.7474e-07	3.28764e-05	1.00337	GLULP5	processed_pseudogene
ENSG00000224152.1	0.00565256	0.00110116	5.13328	2.84731e-07	3.39313e-05	1.00393	AC009506.1	antisense
ENSG00000212445.1	-0.00335207	0.000654613	-5.12069	3.04416e-07	3.60803e-05	0.997679	RF00554	snoRNA
ENSG00000204054.13	0.00325628	0.000635971	5.12017	3.05267e-07	3.60803e-05	1.00226	LINC00963	processed_transcript
ENSG00000151726.13	0.00582226	0.00113751	5.11842	3.08107e-07	3.61199e-05	1.00404	ACSL1	protein_coding
ENSG00000237169.1	0.00610432	0.00119252	5.11884	3.0742e-07	3.61199e-05	1.00424	RPL12P27	processed_pseudogene
ENSG00000277763.1	0.00557797	0.00109017	5.11661	3.11082e-07	3.6321e-05	1.00387	AL138995.1	lincRNA
ENSG00000172575.11	-0.00327647	0.000640581	-5.11484	3.14007e-07	3.65147e-05	0.997732	RASGRP1	protein_coding
ENSG00000167080.8	0.00295475	0.000577873	5.11314	3.16841e-07	3.6654e-05	1.00205	B4GALNT2	protein_coding
ENSG00000100504.16	0.00481395	0.000941585	5.1126	3.17747e-07	3.6654e-05	1.00334	PYGL	protein_coding
ENSG00000144118.13	0.00415801	0.000813694	5.11005	3.2208e-07	3.70058e-05	1.00289	RALB	protein_coding
ENSG00000182831.11	0.00253951	0.00049707	5.10896	3.23939e-07	3.70717e-05	1.00176	C16orf72	protein_coding
ENSG00000274367.1	0.00293493	0.000574586	5.1079	3.25761e-07	3.71329e-05	1.00204	AC004233.4	lincRNA
ENSG00000178199.13	-0.00326426	0.000639279	-5.10615	3.28781e-07	3.73296e-05	0.99774	ZC3H12D	protein_coding
ENSG00000163492.15	-0.0046816	0.000917184	-5.10432	3.31983e-07	3.75453e-05	0.99676	CCDC141	protein_coding
ENSG00000232450.1	0.00445067	0.000872673	5.10005	3.39572e-07	3.82536e-05	1.00309	AL133517.1	transcribed_processed_pseudogene
ENSG00000142405.21	0.00435899	0.000855537	5.09504	3.48671e-07	3.89741e-05	1.00303	NLRP12	protein_coding
ENSG00000266094.7	0.00247018	0.000484764	5.09564	3.47568e-07	3.89741e-05	1.00171	RASSF5	protein_coding
ENSG00000146828.17	0.00358557	0.000704328	5.09077	3.56607e-07	3.97073e-05	1.00249	SLC12A9	protein_coding
ENSG00000177410.12	0.00360785	0.000708853	5.08969	3.58644e-07	3.97791e-05	1.0025	ZFAS1	antisense
ENSG00000280088.1	0.00304758	0.000598859	5.08897	3.60011e-07	3.97791e-05	1.00211	AC126474.2	TEC
ENSG00000211947.2	-0.00923919	0.00181665	-5.08583	3.6602e-07	4.02651e-05	0.993616	IGHV3-21	IG_V_gene
ENSG00000174885.12	0.00603041	0.00118587	5.08522	3.67201e-07	4.02651e-05	1.00419	NLRP6	protein_coding
ENSG00000154889.16	0.00297343	0.000584933	5.08337	3.70791e-07	4.05047e-05	1.00206	MPPE1	protein_coding
ENSG00000197403.4	0.0118492	0.0023314	5.08245	3.72592e-07	4.05479e-05	1.00825	OR6N1	protein_coding
ENSG00000228938.3	-0.0071967	0.00141623	-5.08159	3.74279e-07	4.05783e-05	0.995024	SNRPD2P1	processed_pseudogene
ENSG00000025039.14	0.00376982	0.000742451	5.07753	3.82376e-07	4.13009e-05	1.00262	RRAGD	protein_coding
ENSG00000275418.1	-0.00724023	0.00142632	-5.07615	3.85163e-07	4.14467e-05	0.994994	AC104971.3	lincRNA
ENSG00000072952.18	0.00495821	0.000977077	5.07454	3.88442e-07	4.16441e-05	1.00344	MRVI1	protein_coding
ENSG00000084070.11	0.00420918	0.000829671	5.07331	3.9095e-07	4.17578e-05	1.00292	SMAP2	protein_coding
ENSG00000259717.1	0.00630775	0.00124496	5.06664	4.04899e-07	4.30882e-05	1.00438	LINC00677	lincRNA
ENSG00000092200.12	0.00476014	0.000940061	5.06365	4.11302e-07	4.34284e-05	1.0033	RPGRIP1	protein_coding
ENSG00000233461.5	0.00512417	0.00101207	5.06304	4.12614e-07	4.34284e-05	1.00356	AL445524.1	antisense
ENSG00000120868.13	0.00324255	0.000640398	5.06333	4.11987e-07	4.34284e-05	1.00225	APAF1	protein_coding
ENSG00000108788.11	0.0021465	0.000424377	5.058	4.23685e-07	4.44315e-05	1.00149	MLX	protein_coding
ENSG00000213373.7	0.00514624	0.00101953	5.04766	4.47243e-07	4.6732e-05	1.00357	LINC00671	lincRNA
ENSG00000182782.7	0.00562314	0.00111452	5.04536	4.52667e-07	4.7128e-05	1.00391	HCAR2	protein_coding
ENSG00000254788.7	0.00404591	0.000803809	5.03342	4.81799e-07	4.99806e-05	1.00281	CKLF-CMTM1	protein_coding
ENSG00000170871.11	0.00318985	0.000634974	5.0236	5.07128e-07	5.23031e-05	1.00221	KIAA0232	protein_coding
ENSG00000135870.11	0.002232	0.000444327	5.02334	5.07815e-07	5.23031e-05	1.00155	RC3H1	protein_coding
ENSG00000278955.3	0.00442472	0.000881118	5.02172	5.1212e-07	5.25588e-05	1.00307	FP475955.1	lincRNA
ENSG00000179299.16	0.0051491	0.0010257	5.0201	5.16455e-07	5.28158e-05	1.00358	NSUN7	protein_coding
ENSG00000113916.17	0.00529673	0.00105574	5.01707	5.24663e-07	5.30238e-05	1.00368	BCL6	protein_coding
ENSG00000184014.7	0.00346244	0.000690045	5.0177	5.22932e-07	5.30238e-05	1.0024	DENND5A	protein_coding
ENSG00000276867.1	-0.00416866	0.000830962	-5.01666	5.25762e-07	5.30238e-05	0.997115	AC074050.4	lincRNA
ENSG00000105514.7	0.00454577	0.000906139	5.01663	5.25844e-07	5.30238e-05	1.00316	RAB3D	protein_coding
ENSG00000123066.8	0.00241407	0.000481939	5.00907	5.46944e-07	5.49593e-05	1.00167	MED13L	protein_coding
ENSG00000234345.2	-0.00288754	0.000576767	-5.00642	5.5451e-07	5.55261e-05	0.998001	AC234782.3	processed_pseudogene
ENSG00000259268.1	0.00867112	0.00173352	5.00203	5.67293e-07	5.62961e-05	1.00603	AC007950.1	lincRNA
ENSG00000091490.10	-0.00354265	0.000708267	-5.00186	5.67796e-07	5.62961e-05	0.997547	SEL1L3	protein_coding
ENSG00000146094.14	0.0048537	0.000970395	5.00177	5.68056e-07	5.62961e-05	1.00337	DOK3	protein_coding
ENSG00000260452.1	0.00410407	0.000820691	5.00075	5.71086e-07	5.64025e-05	1.00285	TPRKBP2	processed_pseudogene
ENSG00000133318.13	0.00346068	0.000692689	4.99601	5.85286e-07	5.73015e-05	1.0024	RTN3	protein_coding
ENSG00000196663.15	0.00450637	0.000902046	4.99573	5.86149e-07	5.73015e-05	1.00313	TECPR2	protein_coding
ENSG00000272037.1	0.00438806	0.000878247	4.99639	5.84146e-07	5.73015e-05	1.00305	AP002907.1	antisense
ENSG00000010404.17	0.00370932	0.000742891	4.99309	5.94214e-07	5.76988e-05	1.00257	IDS	protein_coding
ENSG00000213085.9	0.00569957	0.00114142	4.99341	5.93232e-07	5.76988e-05	1.00396	CFAP45	protein_coding
ENSG00000235749.2	0.00450041	0.000901513	4.99207	5.97364e-07	5.781e-05	1.00312	AL390860.1	antisense
ENSG00000181444.12	0.00471637	0.000945696	4.9872	6.12612e-07	5.90873e-05	1.00327	ZNF467	protein_coding
ENSG00000140932.9	0.006107	0.00122516	4.98466	6.20705e-07	5.96684e-05	1.00424	CMTM2	protein_coding
ENSG00000137449.15	0.0038586	0.000774771	4.98031	6.34838e-07	6.08242e-05	1.00268	CPEB2	protein_coding
ENSG00000093134.14	0.00531727	0.0010683	4.97731	6.44746e-07	6.1569e-05	1.00369	VNN3	protein_coding
ENSG00000271259.1	0.00332067	0.000667433	4.97528	6.51525e-07	6.2011e-05	1.0023	AC010201.1	lincRNA
ENSG00000116138.12	-0.00150564	0.000302697	-4.97407	6.55614e-07	6.21949e-05	0.998957	DNAJC16	protein_coding
ENSG00000115828.16	0.00547299	0.00110159	4.96828	6.75484e-07	6.38698e-05	1.0038	QPCT	protein_coding
ENSG00000228719.1	0.00610064	0.00122849	4.96597	6.83574e-07	6.44235e-05	1.00424	AL022313.2	lincRNA
ENSG00000189067.12	0.00440974	0.000888203	4.96479	6.87748e-07	6.46058e-05	1.00306	LITAF	protein_coding
ENSG00000160588.9	0.00415915	0.000837878	4.96391	6.90866e-07	6.46879e-05	1.00289	MPZL3	protein_coding
ENSG00000100365.14	0.00474745	0.000956759	4.96201	6.97674e-07	6.5114e-05	1.0033	NCF4	protein_coding
ENSG00000114268.11	0.00412742	0.000831996	4.96086	7.01805e-07	6.52882e-05	1.00287	PFKFB4	protein_coding
ENSG00000223117.1	0.00484755	0.000977398	4.95965	7.06217e-07	6.54533e-05	1.00337	RN7SKP296	misc_RNA
ENSG00000259962.1	0.00594837	0.00119963	4.9585	7.10388e-07	6.54533e-05	1.00413	AC007342.2	unprocessed_pseudogene
ENSG00000123636.17	0.00340204	0.000686094	4.95856	7.10161e-07	6.54533e-05	1.00236	BAZ2B	protein_coding
ENSG00000165886.4	0.00485285	0.000979682	4.9535	7.28915e-07	6.69464e-05	1.00337	UBTD1	protein_coding
ENSG00000273812.1	0.00633889	0.00128057	4.95004	7.41982e-07	6.78488e-05	1.0044	BX640514.2	lincRNA
ENSG00000129450.8	0.00372893	0.000753372	4.94966	7.43445e-07	6.78488e-05	1.00259	SIGLEC9	protein_coding
ENSG00000008294.20	0.00291245	0.000588803	4.94639	7.56041e-07	6.87806e-05	1.00202	SPAG9	protein_coding
ENSG00000278700.1	0.00374894	0.000758034	4.94561	7.59075e-07	6.88395e-05	1.0026	RF00017	misc_RNA
ENSG00000249274.1	0.00418887	0.000847184	4.94446	7.63556e-07	6.8918e-05	1.00291	PDLIM1P4	processed_pseudogene
ENSG00000147416.10	0.00341672	0.000691062	4.94416	7.6472e-07	6.8918e-05	1.00237	ATP6V1B2	protein_coding
ENSG00000136869.14	0.00461115	0.000932955	4.94252	7.71201e-07	6.92856e-05	1.0032	TLR4	protein_coding
ENSG00000150403.17	0.00254111	0.000514302	4.9409	7.77641e-07	6.96472e-05	1.00176	TMCO3	protein_coding
ENSG00000130703.16	0.00297851	0.000603107	4.9386	7.86853e-07	7.0254e-05	1.00207	OSBPL2	protein_coding
ENSG00000136238.17	0.00246491	0.000499404	4.9357	7.98635e-07	7.10859e-05	1.00171	RAC1	protein_coding
ENSG00000255723.1	0.003105	0.000629335	4.93377	8.06557e-07	7.15701e-05	1.00215	AC108516.2	processed_transcript
ENSG00000248521.1	-0.0026986	0.000547345	-4.93034	8.20852e-07	7.26152e-05	0.998131	AC092612.1	processed_pseudogene
ENSG00000175471.19	0.00357151	0.000724497	4.92964	8.23821e-07	7.2655e-05	1.00248	MCTP1	protein_coding
ENSG00000231485.1	0.00351124	0.000712605	4.92732	8.33631e-07	7.3296e-05	1.00244	AL357078.1	lincRNA
ENSG00000162747.10	0.00618621	0.00125834	4.91617	8.82545e-07	7.73609e-05	1.0043	FCGR3B	protein_coding
ENSG00000105352.10	0.00516581	0.00105239	4.90866	9.16999e-07	7.99262e-05	1.00359	CEACAM4	protein_coding
ENSG00000273084.1	0.00551907	0.00112437	4.90859	9.17354e-07	7.99262e-05	1.00383	AC092171.5	lincRNA
ENSG00000140995.16	0.00351042	0.000716379	4.90023	9.57247e-07	8.31507e-05	1.00244	DEF8	protein_coding
ENSG00000111052.7	0.00492505	0.00100666	4.89245	9.95887e-07	8.62474e-05	1.00342	LIN7A	protein_coding
ENSG00000109103.11	0.00310678	0.000635274	4.89045	1.00603e-06	8.67221e-05	1.00216	UNC119	protein_coding
ENSG00000225889.7	0.0044122	0.000902255	4.89019	1.00738e-06	8.67221e-05	1.00306	AC012368.1	antisense
ENSG00000175137.10	0.00304139	0.000622124	4.88873	1.01491e-06	8.71101e-05	1.00211	SH3BP5L	protein_coding
ENSG00000280832.1	0.00447897	0.000916638	4.8863	1.02747e-06	8.7823e-05	1.00311	GSEC	antisense
ENSG00000229955.1	0.00308626	0.000631661	4.88595	1.02931e-06	8.7823e-05	1.00214	Z98749.1	sense_intronic
ENSG00000279632.1	0.00278173	0.000569438	4.88505	1.03404e-06	8.79667e-05	1.00193	AP003108.4	TEC
ENSG00000110080.18	0.00451551	0.000924739	4.88302	1.04476e-06	8.8357e-05	1.00313	ST3GAL4	protein_coding
ENSG00000092871.16	0.00267452	0.000547714	4.88306	1.0445e-06	8.8357e-05	1.00186	RFFL	protein_coding
ENSG00000161533.11	0.00391786	0.000802483	4.88216	1.04928e-06	8.84799e-05	1.00272	ACOX1	protein_coding
ENSG00000272501.1	0.00342817	0.000702526	4.87977	1.06207e-06	8.92976e-05	1.00238	AL662844.4	antisense
ENSG00000175489.9	0.0040987	0.000840062	4.87904	1.06602e-06	8.93692e-05	1.00285	LRRC25	protein_coding
ENSG00000123700.4	0.00500055	0.00102567	4.87541	1.08585e-06	9.07676e-05	1.00347	KCNJ2	protein_coding
ENSG00000252222.1	0.00498208	0.00102226	4.87359	1.0959e-06	9.13427e-05	1.00346	RNU7-13P	snRNA
ENSG00000135365.15	0.00300648	0.000617135	4.87168	1.10654e-06	9.16994e-05	1.00209	PHF21A	protein_coding
ENSG00000263712.1	0.00359457	0.000737823	4.87186	1.10553e-06	9.16994e-05	1.00249	MIR4639	miRNA
ENSG00000075426.11	0.0040415	0.000829701	4.87103	1.11016e-06	9.17363e-05	1.00281	FOSL2	protein_coding
ENSG00000179715.12	-0.00383742	0.000787989	-4.86989	1.11663e-06	9.2007e-05	0.997344	PCED1B	protein_coding
ENSG00000143207.20	0.0028808	0.000591972	4.86644	1.13628e-06	9.33595e-05	1.002	COP1	protein_coding
ENSG00000187553.8	0.0044801	0.000921098	4.86386	1.15116e-06	9.43136e-05	1.00311	CYP26C1	protein_coding
ENSG00000197622.12	0.00236782	0.00048716	4.86046	1.17112e-06	9.56768e-05	1.00164	CDC42SE1	protein_coding
ENSG00000067182.7	0.00400039	0.000823748	4.85633	1.19581e-06	9.68924e-05	1.00278	TNFRSF1A	protein_coding
ENSG00000197712.11	0.00286532	0.000589939	4.85697	1.19196e-06	9.68924e-05	1.00199	FAM114A1	protein_coding
ENSG00000237135.1	0.00532614	0.00109675	4.85629	1.19608e-06	9.68924e-05	1.0037	DDX10P1	processed_pseudogene
ENSG00000165030.3	0.00434191	0.000894299	4.8551	1.20325e-06	9.72007e-05	1.00301	NFIL3	protein_coding
ENSG00000126602.10	-0.00273364	0.000563713	-4.84935	1.23865e-06	9.97802e-05	0.998107	TRAP1	protein_coding
ENSG00000274845.1	0.00479411	0.000990204	4.84154	1.28836e-06	0.000103496	1.00333	RF02271	misc_RNA
ENSG00000284948.1	0.00451862	0.000933634	4.83982	1.29958e-06	0.000104107	1.00314	AC107959.4	lincRNA
ENSG00000163125.15	-0.00174979	0.000361648	-4.83839	1.30896e-06	0.000104538	0.998788	RPRD2	protein_coding
ENSG00000059377.16	0.00340915	0.000704676	4.8379	1.31221e-06	0.000104538	1.00237	TBXAS1	protein_coding
ENSG00000132965.9	0.005036	0.00104163	4.83474	1.33321e-06	0.000105668	1.0035	ALOX5AP	protein_coding
ENSG00000158887.15	0.0036823	0.000761645	4.83466	1.33372e-06	0.000105668	1.00256	MPZ	protein_coding
ENSG00000134698.10	0.00297818	0.000616296	4.83237	1.34914e-06	0.000106597	1.00207	AGO4	protein_coding
ENSG00000179456.10	0.00272913	0.00056559	4.82527	1.39811e-06	0.000110164	1.00189	ZBTB18	protein_coding
ENSG00000189159.15	0.00358878	0.000743838	4.82468	1.4023e-06	0.000110194	1.00249	JPT1	protein_coding
ENSG00000246016.2	0.0046471	0.000963335	4.82397	1.40727e-06	0.000110284	1.00323	LINC01513	antisense
ENSG00000160856.20	-0.005493	0.00113917	-4.82193	1.42174e-06	0.000111115	0.9962	FCRL3	protein_coding
ENSG00000272799.1	0.0041137	0.000853458	4.82004	1.43528e-06	0.000111871	1.00286	AC006238.1	lincRNA
ENSG00000181631.6	0.00419671	0.000870846	4.81913	1.44188e-06	0.000111997	1.00291	P2RY13	protein_coding
ENSG00000198874.12	-0.00201583	0.000418378	-4.81821	1.44855e-06	0.000111997	0.998604	TYW1	protein_coding
ENSG00000254087.7	0.00344421	0.000714814	4.81833	1.44767e-06	0.000111997	1.00239	LYN	protein_coding
ENSG00000151893.14	0.0025944	0.000538772	4.8154	1.46903e-06	0.000113277	1.0018	CACUL1	protein_coding
ENSG00000110931.18	0.00329063	0.000683742	4.81268	1.48919e-06	0.000113955	1.00228	CAMKK2	protein_coding
ENSG00000133961.20	0.00333583	0.000693071	4.81311	1.48599e-06	0.000113955	1.00231	NUMB	protein_coding
ENSG00000221869.4	0.00481155	0.000999779	4.81261	1.48969e-06	0.000113955	1.00334	CEBPD	protein_coding
ENSG00000116514.16	0.00351986	0.000732366	4.80615	1.53863e-06	0.000117078	1.00244	RNF19B	protein_coding
ENSG00000174021.10	0.0032522	0.000676639	4.8064	1.5367e-06	0.000117078	1.00226	GNG5	protein_coding
ENSG00000015475.18	0.00293582	0.000611208	4.80331	1.56061e-06	0.000118127	1.00204	BID	protein_coding
ENSG00000136371.10	0.00307154	0.000639448	4.80342	1.5598e-06	0.000118127	1.00213	MTHFS	protein_coding
ENSG00000242860.3	0.00373994	0.000779061	4.80057	1.58214e-06	0.000119443	1.0026	RN7SL180P	misc_RNA
ENSG00000165046.12	0.00342355	0.000713301	4.79959	1.58993e-06	0.000119718	1.00238	LETM2	protein_coding
ENSG00000166912.16	0.00251821	0.000524795	4.79846	1.59894e-06	0.000120083	1.00175	MTMR10	protein_coding
ENSG00000167536.13	0.00416546	0.000868493	4.79619	1.61708e-06	0.000120504	1.00289	DHRS13	protein_coding
ENSG00000281162.2	0.00576544	0.00120198	4.79662	1.61368e-06	0.000120504	1.004	LINC01127	lincRNA
ENSG00000087157.18	0.00369247	0.000769865	4.79626	1.61658e-06	0.000120504	1.00256	PGS1	protein_coding
ENSG00000138758.11	-0.00250162	0.00052229	-4.78971	1.67021e-06	0.000124142	0.998268	2023-09-11	protein_coding
ENSG00000197971.14	0.00268975	0.000562156	4.7847	1.71245e-06	0.000125186	1.00187	MBP	protein_coding
ENSG00000186431.18	0.00461257	0.000963547	4.78707	1.69233e-06	0.000125186	1.0032	FCAR	protein_coding
ENSG00000173597.8	0.00510798	0.00106718	4.78641	1.69789e-06	0.000125186	1.00355	SULT1B1	protein_coding
ENSG00000235750.9	0.00283687	0.000592925	4.78454	1.71376e-06	0.000125186	1.00197	KIAA0040	protein_coding
ENSG00000146859.6	0.00415402	0.000867846	4.78659	1.69641e-06	0.000125186	1.00288	TMEM140	protein_coding
ENSG00000155111.14	0.00289009	0.00060406	4.78444	1.71464e-06	0.000125186	1.00201	CDK19	protein_coding
ENSG00000200769.1	-0.00378688	0.000791284	-4.78573	1.70364e-06	0.000125186	0.997379	RF00019	misc_RNA
ENSG00000168461.12	0.00378692	0.0007922	4.78025	1.75075e-06	0.00012733	1.00263	RAB31	protein_coding
ENSG00000267275.1	0.00340896	0.000713169	4.78001	1.75283e-06	0.00012733	1.00237	AC020911.2	antisense
ENSG00000267546.2	0.00351426	0.000735402	4.7787	1.76436e-06	0.000127845	1.00244	AC015802.4	antisense
ENSG00000205155.7	0.00321209	0.000672467	4.77658	1.783e-06	0.000128872	1.00223	PSENEN	protein_coding
ENSG00000157557.11	0.0035579	0.000745202	4.77441	1.80231e-06	0.000129942	1.00247	ETS2	protein_coding
ENSG00000240777.2	0.00549155	0.00115034	4.77385	1.80733e-06	0.000129979	1.00381	AC025572.1	lincRNA
ENSG00000273271.1	-0.00349334	0.000732527	-4.76888	1.85249e-06	0.000132472	0.997582	AP000254.1	antisense
ENSG00000166579.15	0.00321345	0.00067378	4.76928	1.84887e-06	0.000132472	1.00223	NDEL1	protein_coding
ENSG00000267519.6	0.00428188	0.000897946	4.76853	1.85577e-06	0.000132472	1.00297	AC020916.1	antisense
ENSG00000274929.1	0.00314879	0.000660994	4.76372	1.90057e-06	0.000135202	1.00218	AL157813.1	sense_intronic
ENSG00000272562.1	0.00316054	0.000663502	4.76342	1.90339e-06	0.000135202	1.00219	AL512343.2	antisense
ENSG00000105443.14	0.00209262	0.000440265	4.75308	2.00337e-06	0.000141606	1.00145	CYTH2	protein_coding
ENSG00000211597.2	-0.00554557	0.00116669	-4.75323	2.00191e-06	0.000141606	0.996163	IGKJ1	IG_J_gene
ENSG00000182117.5	0.00355904	0.000749374	4.74935	2.04068e-06	0.000143696	1.00247	NOP10	protein_coding
ENSG00000163513.17	0.00215873	0.0004546	4.74864	2.04789e-06	0.000143696	1.0015	TGFBR2	protein_coding
ENSG00000132334.16	0.00277518	0.000584377	4.74894	2.04481e-06	0.000143696	1.00193	PTPRE	protein_coding
ENSG00000238260.1	0.00383231	0.000807396	4.7465	2.06969e-06	0.000144873	1.00266	AL513320.1	antisense
ENSG00000172830.12	0.00371699	0.000783863	4.74189	2.11736e-06	0.000147783	1.00258	SSH3	protein_coding
ENSG00000151651.15	0.0041611	0.000877594	4.74149	2.1215e-06	0.000147783	1.00289	ADAM8	protein_coding
ENSG00000080839.11	-0.00301061	0.000635158	-4.73993	2.1379e-06	0.000148209	0.997915	RBL1	protein_coding
ENSG00000108559.11	-0.00259404	0.00054723	-4.74031	2.13393e-06	0.000148209	0.998204	NUP88	protein_coding
ENSG00000100030.14	0.00239872	0.000506267	4.73804	2.15791e-06	0.000149017	1.00166	MAPK1	protein_coding
ENSG00000186205.12	0.0046748	0.00098669	4.73786	2.15989e-06	0.000149017	1.00325	2023-03-01	protein_coding
ENSG00000196782.12	0.00370657	0.00078254	4.73659	2.17346e-06	0.000149595	1.00257	MAML3	protein_coding
ENSG00000167193.7	0.00249212	0.000526288	4.73529	2.18747e-06	0.000150126	1.00173	CRK	protein_coding
ENSG00000235782.1	0.0044915	0.000948593	4.7349	2.19158e-06	0.000150126	1.00312	AL031429.1	antisense
ENSG00000158201.9	0.00316357	0.000669098	4.72812	2.26611e-06	0.000154058	1.0022	ABHD3	protein_coding
ENSG00000270704.3	-0.00480463	0.00101632	-4.72748	2.27322e-06	0.000154058	0.996675	AC124312.4	sense_intronic
ENSG00000174007.7	0.00460474	0.000974084	4.72724	2.27587e-06	0.000154058	1.0032	CEP19	protein_coding
ENSG00000197385.5	-0.00831294	0.00175828	-4.72787	2.26883e-06	0.000154058	0.994254	ZNF860	protein_coding
ENSG00000213714.1	0.00390853	0.000826676	4.72801	2.26733e-06	0.000154058	1.00271	FAM209B	protein_coding
ENSG00000256325.1	0.0027439	0.000580501	4.72678	2.28104e-06	0.000154058	1.0019	AC025423.1	antisense
ENSG00000143409.15	0.00372323	0.000788327	4.72295	2.32444e-06	0.000155894	1.00258	MINDY1	protein_coding
ENSG00000073331.17	0.00396942	0.000840287	4.72389	2.3138e-06	0.000155894	1.00276	ALPK1	protein_coding
ENSG00000048740.18	0.00211275	0.000447319	4.72313	2.32245e-06	0.000155894	1.00147	CELF2	protein_coding
ENSG00000153310.19	0.00277102	0.000587154	4.71941	2.36529e-06	0.000158266	1.00192	FAM49B	protein_coding
ENSG00000172243.17	0.00362067	0.000767481	4.71761	2.38632e-06	0.000159303	1.00251	CLEC7A	protein_coding
ENSG00000171824.13	-0.00196613	0.000416809	-4.71711	2.39222e-06	0.000159328	0.998638	EXOSC10	protein_coding
ENSG00000116793.15	0.00241467	0.000511974	4.71639	2.40072e-06	0.000159526	1.00168	PHTF1	protein_coding
ENSG00000100296.13	0.00262758	0.0005572	4.71569	2.4089e-06	0.000159701	1.00182	THOC5	protein_coding
ENSG00000274213.1	0.00628821	0.00133379	4.71456	2.42236e-06	0.000160226	1.00437	AC015912.3	lincRNA
ENSG00000109762.15	-0.00363377	0.000770886	-4.71375	2.43193e-06	0.000160491	0.997484	SNX25	protein_coding
ENSG00000101846.6	0.00328824	0.000697728	4.71277	2.44367e-06	0.000160897	1.00228	STS	protein_coding
ENSG00000249579.2	-0.00467538	0.000992636	-4.71006	2.47645e-06	0.000162684	0.996765	AC113420.1	processed_pseudogene
ENSG00000112195.8	0.00405136	0.000860651	4.70732	2.50992e-06	0.000164508	1.00281	TREML2	protein_coding
ENSG00000010539.11	0.00206953	0.000440359	4.69965	2.60605e-06	0.000169735	1.00144	ZNF200	protein_coding
ENSG00000172354.9	0.00363398	0.000773219	4.69981	2.60409e-06	0.000169735	1.00252	GNB2	protein_coding
ENSG00000068383.18	0.0026898	0.000572352	4.69955	2.60732e-06	0.000169735	1.00187	INPP5A	protein_coding
ENSG00000263595.2	0.00351496	0.00074823	4.69769	2.63119e-06	0.000170519	1.00244	RN7SL823P	misc_RNA
ENSG00000179761.11	0.00275785	0.000587015	4.69809	2.62611e-06	0.000170519	1.00191	PIPOX	protein_coding
ENSG00000137642.12	0.00379596	0.000808232	4.69662	2.64507e-06	0.000170652	1.00263	SORL1	protein_coding
ENSG00000188186.10	0.00367422	0.000782266	4.69689	2.64149e-06	0.000170652	1.00255	LAMTOR4	protein_coding
ENSG00000169220.17	0.00341219	0.000726649	4.69579	2.65573e-06	0.000170957	1.00237	RGS14	protein_coding
ENSG00000121060.17	0.00424037	0.000903155	4.69506	2.66526e-06	0.000171188	1.00294	TRIM25	protein_coding
ENSG00000109193.11	0.00474999	0.00101257	4.69101	2.71861e-06	0.000174226	1.0033	SULT1E1	protein_coding
ENSG00000284688.1	0.00548668	0.0011707	4.68669	2.77663e-06	0.00017755	1.00381	AL121936.2	unprocessed_pseudogene
ENSG00000241978.9	-0.0044231	0.00094399	-4.68554	2.79228e-06	0.000178156	0.996939	AKAP2	protein_coding
ENSG00000140332.15	0.00398024	0.000849734	4.6841	2.81196e-06	0.000178918	1.00276	TLE3	protein_coding
ENSG00000138678.10	0.00457924	0.000977754	4.68343	2.82119e-06	0.000178918	1.00318	GPAT3	protein_coding
ENSG00000213722.8	0.00339938	0.000725851	4.68331	2.82284e-06	0.000178918	1.00236	DDAH2	protein_coding
ENSG00000177674.15	0.00341166	0.000728561	4.68273	2.83077e-06	0.000179028	1.00237	AGTRAP	protein_coding
ENSG00000213462.4	0.00362724	0.000775133	4.67951	2.87558e-06	0.000181463	1.00252	ERV3-1	protein_coding
ENSG00000248302.3	-0.00883377	0.0018889	-4.67669	2.9155e-06	0.000183397	0.993896	BNIP3P41	transcribed_processed_pseudogene
ENSG00000234432.4	0.00476125	0.00101833	4.67555	2.93165e-06	0.000183397	1.00331	AC092171.3	lincRNA
ENSG00000113749.7	0.00439476	0.00093984	4.67607	2.92432e-06	0.000183397	1.00305	HRH2	protein_coding
ENSG00000174125.7	0.00424904	0.000908739	4.67575	2.92877e-06	0.000183397	1.00295	TLR1	protein_coding
ENSG00000119397.16	-0.00232722	0.000497888	-4.67419	2.9511e-06	0.000184214	0.998388	CNTRL	protein_coding
ENSG00000197249.13	0.00446501	0.000955587	4.67253	2.97511e-06	0.000184912	1.0031	SERPINA1	protein_coding
ENSG00000105835.11	0.00536425	0.00114802	4.67259	2.97423e-06	0.000184912	1.00373	NAMPT	protein_coding
ENSG00000232536.1	0.0049328	0.0010561	4.67076	3.00087e-06	0.000186112	1.00343	AL365436.2	sense_intronic
ENSG00000103194.15	0.00319691	0.000684904	4.66767	3.04629e-06	0.00018812	1.00222	USP10	protein_coding
ENSG00000100034.13	0.00391127	0.000837897	4.66796	3.04203e-06	0.00018812	1.00271	PPM1F	protein_coding
ENSG00000128908.16	-0.00156197	0.000334683	-4.667	3.05622e-06	0.00018833	0.998918	INO80	protein_coding
ENSG00000180509.11	0.00439585	0.000942288	4.66508	3.08497e-06	0.000189696	1.00305	KCNE1	protein_coding
ENSG00000243660.9	0.00281525	0.000603796	4.66259	3.12255e-06	0.000191598	1.00195	ZNF487	protein_coding
ENSG00000274963.1	0.00365748	0.000784673	4.66115	3.14448e-06	0.000192534	1.00254	RN7SL600P	misc_RNA
ENSG00000101457.12	0.00351124	0.000753401	4.66052	3.15417e-06	0.000192718	1.00244	DNTTIP1	protein_coding
ENSG00000007944.14	0.0031647	0.000679518	4.65727	3.20423e-06	0.000195363	1.0022	MYLIP	protein_coding
ENSG00000243664.1	0.00653787	0.00140399	4.65662	3.21437e-06	0.000195568	1.00454	RPS29P12	processed_pseudogene
ENSG00000196954.13	0.00336691	0.000723352	4.6546	3.2461e-06	0.000197083	1.00234	CASP4	protein_coding
ENSG00000150977.10	0.0024702	0.000530824	4.65352	3.26311e-06	0.000197699	1.00171	RILPL2	protein_coding
ENSG00000163602.10	0.0028542	0.000613588	4.65165	3.29285e-06	0.000199083	1.00198	RYBP	protein_coding
ENSG00000161921.14	0.00445954	0.000959282	4.64883	3.3382e-06	0.000201402	1.0031	CXCL16	protein_coding
ENSG00000198814.12	0.00426511	0.000917921	4.64649	3.37631e-06	0.000203277	1.00296	GK	protein_coding
ENSG00000100228.12	0.00586215	0.00126239	4.64369	3.42249e-06	0.000205627	1.00407	RAB36	protein_coding
ENSG00000182541.17	0.00443248	0.000954799	4.64232	3.44524e-06	0.000206519	1.00308	LIMK2	protein_coding
ENSG00000236352.1	0.00653244	0.00140727	4.64193	3.45165e-06	0.000206519	1.00454	AC005220.1	antisense
ENSG00000018280.16	0.0045806	0.000987139	4.64028	3.47936e-06	0.000207746	1.00318	SLC11A1	protein_coding
ENSG00000128383.12	0.00471168	0.00101605	4.63724	3.53089e-06	0.000209953	1.00327	APOBEC3A	protein_coding
ENSG00000170734.11	-0.00198762	0.000428596	-4.63752	3.52615e-06	0.000209953	0.998623	POLH	protein_coding
ENSG00000223749.9	0.00533901	0.00115147	4.63668	3.54058e-06	0.000210096	1.00371	MIR503HG	lincRNA
ENSG00000119471.14	0.00390102	0.000841586	4.63532	3.56392e-06	0.000211047	1.00271	HSDL2	protein_coding
ENSG00000128311.13	0.00412789	0.000890809	4.63387	3.58895e-06	0.000212094	1.00287	TST	protein_coding
ENSG00000237441.9	0.00345604	0.000746263	4.63113	3.63673e-06	0.000214478	1.0024	RGL2	protein_coding
ENSG00000059804.15	0.00438075	0.000946339	4.62915	3.67163e-06	0.000215741	1.00304	SLC2A3	protein_coding
ENSG00000229808.1	0.00326856	0.000706104	4.629	3.67435e-06	0.000215741	1.00227	AL391825.1	transcribed_processed_pseudogene
ENSG00000120051.14	0.00495129	0.00106971	4.62865	3.68058e-06	0.000215741	1.00344	CFAP58	protein_coding
ENSG00000136861.17	-0.00197415	0.000426685	-4.6267	3.71531e-06	0.000217334	0.998633	CDK5RAP2	protein_coding
ENSG00000226985.6	0.00395316	0.000854846	4.62441	3.75666e-06	0.000219004	1.00274	LINC01203	lincRNA
ENSG00000228124.1	-0.00483626	0.00104584	-4.62428	3.75904e-06	0.000219004	0.996653	AL096678.1	antisense
ENSG00000156052.10	0.00294517	0.000637009	4.62343	3.77445e-06	0.000219458	1.00204	GNAQ	protein_coding
ENSG00000140749.8	0.00405831	0.000878414	4.62004	3.83662e-06	0.000222177	1.00282	IGSF6	protein_coding
ENSG00000131669.9	0.00410937	0.000889404	4.62037	3.8306e-06	0.000222177	1.00285	NINJ1	protein_coding
ENSG00000103381.11	0.0037736	0.000817423	4.61646	3.90346e-06	0.000225595	1.00262	CPPED1	protein_coding
ENSG00000249667.1	-0.00430416	0.000932791	-4.61428	3.94464e-06	0.000227519	0.997021	LINC01259	lincRNA
ENSG00000160208.12	-0.00247896	0.00053733	-4.61347	3.95995e-06	0.000227742	0.998283	RRP1B	protein_coding
ENSG00000189077.10	0.00357742	0.000775466	4.61325	3.96429e-06	0.000227742	1.00248	TMEM120A	protein_coding
ENSG00000076662.9	0.00399363	0.000866153	4.61077	4.01179e-06	0.000229556	1.00277	ICAM3	protein_coding
ENSG00000121957.13	0.00315349	0.000683911	4.61096	4.00811e-06	0.000229556	1.00219	GPSM2	protein_coding
ENSG00000069974.15	0.00248329	0.000538726	4.60957	4.03512e-06	0.000230434	1.00172	RAB27A	protein_coding
ENSG00000157450.15	0.00202201	0.000438742	4.60865	4.05295e-06	0.000230994	1.0014	RNF111	protein_coding
ENSG00000155265.10	-0.00365351	0.000792906	-4.60775	4.07046e-06	0.000231535	0.997471	GOLGA7B	protein_coding
ENSG00000242999.3	0.00233637	0.000507558	4.60315	4.16146e-06	0.000236245	1.00162	RN7SL239P	misc_RNA
ENSG00000101493.10	0.00357808	0.000777433	4.60242	4.17606e-06	0.000236608	1.00248	ZNF516	protein_coding
ENSG00000203644.3	0.0038388	0.000834195	4.6018	4.18852e-06	0.000236848	1.00266	AC083799.1	sense_intronic
ENSG00000159496.14	0.00456477	0.000992798	4.59788	4.26802e-06	0.000240872	1.00317	RGL4	protein_coding
ENSG00000120800.4	-0.00211028	0.000459046	-4.5971	4.28407e-06	0.000241305	0.998538	UTP20	protein_coding
ENSG00000163625.15	0.00419037	0.000911848	4.59547	4.31782e-06	0.000242732	1.00291	WDFY3	protein_coding
ENSG00000188917.14	-0.00184929	0.00040266	-4.59269	4.37568e-06	0.000245506	0.998719	TRMT2B	protein_coding
ENSG00000163297.16	0.00269398	0.000586666	4.59201	4.38991e-06	0.000245827	1.00187	ANTXR2	protein_coding
ENSG00000167851.14	0.00323973	0.000705695	4.59084	4.41458e-06	0.000246255	1.00225	CD300A	protein_coding
ENSG00000233246.1	0.00491085	0.00106971	4.59084	4.41464e-06	0.000246255	1.00341	AL513327.2	antisense
ENSG00000171940.13	0.00229521	0.000500102	4.58948	4.44348e-06	0.000247385	1.00159	ZNF217	protein_coding
ENSG00000166261.10	-0.00214878	0.000468456	-4.58694	4.49796e-06	0.000249936	0.998512	ZNF202	protein_coding
ENSG00000149269.9	0.00313168	0.000683409	4.58243	4.59596e-06	0.000254471	1.00217	PAK1	protein_coding
ENSG00000146592.16	0.00461948	0.0010081	4.58238	4.59722e-06	0.000254471	1.00321	CREB5	protein_coding
ENSG00000240457.3	0.00349634	0.000763643	4.57851	4.6831e-06	0.000258728	1.00243	RN7SL472P	misc_RNA
ENSG00000280022.1	-0.00798982	0.00174613	-4.57573	4.74553e-06	0.000261498	0.994477	AC126544.1	TEC
ENSG00000163644.14	-0.00299779	0.000655186	-4.57548	4.75138e-06	0.000261498	0.997924	PPM1K	protein_coding
ENSG00000106714.17	0.00731368	0.0015986	4.57505	4.76114e-06	0.000261536	1.00508	CNTNAP3	protein_coding
ENSG00000033327.12	0.0043898	0.000959865	4.57335	4.79978e-06	0.000262658	1.00305	GAB2	protein_coding
ENSG00000082512.14	-0.00270755	0.000591984	-4.57368	4.79229e-06	0.000262658	0.998125	TRAF5	protein_coding
ENSG00000065135.10	0.00218822	0.000478636	4.57179	4.8358e-06	0.000264128	1.00152	GNAI3	protein_coding
ENSG00000180539.7	0.00362741	0.000793592	4.57087	4.85695e-06	0.000264282	1.00252	C9orf139	antisense
ENSG00000186529.15	0.00497314	0.00108796	4.57106	4.85262e-06	0.000264282	1.00345	CYP4F3	protein_coding
ENSG00000208006.1	0.00570548	0.00125008	4.56411	5.01626e-06	0.000272437	1.00396	MIR16-1	miRNA
ENSG00000137393.9	0.00340452	0.000746283	4.56197	5.06752e-06	0.000274703	1.00236	RNF144B	protein_coding
ENSG00000135775.13	-0.00176951	0.000387972	-4.56094	5.09263e-06	0.000275546	0.998774	COG2	protein_coding
ENSG00000111490.13	0.0039239	0.000860549	4.55976	5.12125e-06	0.000276576	1.00272	TBC1D30	protein_coding
ENSG00000105520.10	0.00483446	0.00106064	4.55807	5.16267e-06	0.000278292	1.00336	PLPPR2	protein_coding
ENSG00000100266.18	0.00347	0.000761468	4.55698	5.18933e-06	0.000279207	1.00241	PACSIN2	protein_coding
ENSG00000144535.19	-0.00201624	0.00044255	-4.55596	5.21479e-06	0.000280054	0.998603	DIS3L2	protein_coding
ENSG00000256235.2	0.00359437	0.000789203	4.55442	5.25298e-06	0.000281213	1.00249	SMIM3	protein_coding
ENSG00000109016.17	0.00197896	0.000434526	4.55431	5.25587e-06	0.000281213	1.00137	DHRS7B	protein_coding
ENSG00000264322.2	0.00396028	0.000870487	4.54949	5.37752e-06	0.000286787	1.00275	RN7SL448P	misc_RNA
ENSG00000171862.10	0.0037635	0.000827324	4.54901	5.38988e-06	0.000286787	1.00261	PTEN	protein_coding
ENSG00000135250.16	0.00230529	0.000506742	4.54924	5.38393e-06	0.000286787	1.0016	SRPK2	protein_coding
ENSG00000224373.3	-0.00838632	0.00184378	-4.54844	5.40449e-06	0.000287035	0.994204	IGHV4-59	IG_V_gene
ENSG00000039319.16	0.00326233	0.000717647	4.54588	5.47073e-06	0.000290019	1.00226	ZFYVE16	protein_coding
ENSG00000172932.14	0.0031844	0.000700657	4.54488	5.49675e-06	0.000290864	1.00221	ANKRD13D	protein_coding
ENSG00000258565.1	0.0038795	0.000853813	4.54373	5.52667e-06	0.000291912	1.00269	BLZF2P	unprocessed_pseudogene
ENSG00000275371.1	0.00474528	0.00104484	4.54162	5.58226e-06	0.000294083	1.00329	AC012645.4	antisense
ENSG00000111859.16	0.00315197	0.000694052	4.5414	5.58818e-06	0.000294083	1.00219	NEDD9	protein_coding
ENSG00000139132.14	0.0035506	0.000782292	4.53871	5.65996e-06	0.000297318	1.00246	FGD4	protein_coding
ENSG00000141480.17	0.00345201	0.000760723	4.5378	5.68448e-06	0.000297949	1.0024	ARRB2	protein_coding
ENSG00000140563.14	0.00345601	0.000761656	4.5375	5.69264e-06	0.000297949	1.0024	MCTP2	protein_coding
ENSG00000254718.6	0.0048013	0.0010583	4.5368	5.71129e-06	0.000298384	1.00333	AL157756.1	antisense
ENSG00000258922.1	0.00428024	0.000943592	4.53611	5.73012e-06	0.000298826	1.00297	AC106028.2	sense_intronic
ENSG00000176463.13	0.00267363	0.000589711	4.5338	5.79321e-06	0.000301571	1.00185	SLCO3A1	protein_coding
ENSG00000248697.1	0.00504982	0.0011144	4.53142	5.85886e-06	0.000304439	1.00351	TOX4P1	processed_pseudogene
ENSG00000272933.1	0.00419426	0.000925899	4.52993	5.90019e-06	0.000306035	1.00291	AL391121.1	lincRNA
ENSG00000101849.16	0.00329838	0.000728404	4.52823	5.94806e-06	0.000307964	1.00229	TBL1X	protein_coding
ENSG00000132475.10	0.00369164	0.000815333	4.52777	5.96084e-06	0.000308073	1.00256	H3F3B	protein_coding
ENSG00000009335.17	-0.0014609	0.000322739	-4.52656	5.99507e-06	0.000308422	0.998988	UBE3C	protein_coding
ENSG00000260190.1	0.00391899	0.000865806	4.5264	5.99968e-06	0.000308422	1.00272	AL807752.5	sense_overlapping
ENSG00000150347.15	-0.00279235	0.000616869	-4.52665	5.99271e-06	0.000308422	0.998066	ARID5B	protein_coding
ENSG00000240303.7	-0.00255428	0.000564479	-4.52503	6.03872e-06	0.000309877	0.998231	ACAD11	protein_coding
ENSG00000132405.18	0.00303388	0.000670782	4.5229	6.09976e-06	0.000311971	1.00211	TBC1D14	protein_coding
ENSG00000125744.11	0.00441399	0.000976011	4.52248	6.11199e-06	0.000311971	1.00306	RTN2	protein_coding
ENSG00000116984.12	-0.00210256	0.000464898	-4.52263	6.10762e-06	0.000311971	0.998544	MTR	protein_coding
ENSG00000271741.1	-0.00263091	0.000581942	-4.52091	6.15757e-06	0.000312088	0.998178	AC114490.2	protein_coding
ENSG00000119900.8	0.00396039	0.000875951	4.52125	6.14759e-06	0.000312088	1.00275	OGFRL1	protein_coding
ENSG00000107829.13	-0.00221554	0.000490059	-4.52097	6.15558e-06	0.000312088	0.998465	FBXW4	protein_coding
ENSG00000119285.10	-0.00244481	0.000540756	-4.52109	6.1521e-06	0.000312088	0.998307	HEATR1	protein_coding
ENSG00000173825.6	0.0049526	0.00109569	4.52006	6.18218e-06	0.00031251	1.00344	TIGD3	protein_coding
ENSG00000161040.16	0.0056122	0.00124167	4.51988	6.18757e-06	0.00031251	1.0039	FBXL13	protein_coding
ENSG00000276961.1	0.00307455	0.000680719	4.51662	6.28344e-06	0.000316797	1.00213	MIR7848	miRNA
ENSG00000097033.14	0.00288108	0.000638355	4.51328	6.38325e-06	0.000320887	1.002	SH3GLB1	protein_coding
ENSG00000112531.16	0.00297372	0.0006589	4.51316	6.38681e-06	0.000320887	1.00206	QKI	protein_coding
ENSG00000120129.5	0.00506181	0.00112241	4.50975	6.49028e-06	0.000325519	1.00351	DUSP1	protein_coding
ENSG00000205423.11	0.00291267	0.000646136	4.50783	6.54951e-06	0.000327919	1.00202	CNEP1R1	protein_coding
ENSG00000148926.9	0.00575275	0.00127631	4.50732	6.56502e-06	0.000328126	1.004	ADM	protein_coding
ENSG00000285851.1	0.0034379	0.000762908	4.50631	6.5964e-06	0.000329124	1.00239	AL359762.3	processed_transcript
ENSG00000197312.11	-0.00205935	0.000457163	-4.50463	6.6489e-06	0.00033117	0.998574	DDI2	protein_coding
ENSG00000169228.13	0.00339277	0.000753344	4.50361	6.68084e-06	0.000332188	1.00235	RAB24	protein_coding
ENSG00000253981.5	0.00512069	0.00113719	4.50295	6.70151e-06	0.000332642	1.00356	ALG1L13P	transcribed_unprocessed_pseudogene
ENSG00000103490.13	0.00361781	0.000803585	4.50209	6.72885e-06	0.000333425	1.00251	PYCARD	protein_coding
ENSG00000130313.6	0.00276035	0.000613282	4.50095	6.76519e-06	0.000334651	1.00192	PGLS	protein_coding
ENSG00000132953.16	-0.00238286	0.000530123	-4.49492	6.95948e-06	0.000343672	0.99835	XPO4	protein_coding
ENSG00000149798.4	0.00534603	0.00119066	4.48999	7.12277e-06	0.000350971	1.00371	CDC42EP2	protein_coding
ENSG00000126822.16	0.00354843	0.000790344	4.48972	7.13164e-06	0.000350971	1.00246	PLEKHG3	protein_coding
ENSG00000171302.16	0.00316803	0.000705925	4.48777	7.19714e-06	0.000353591	1.0022	CANT1	protein_coding
ENSG00000179818.13	0.00290751	0.000647986	4.487	7.22348e-06	0.000354282	1.00202	PCBP1-AS1	processed_transcript
ENSG00000213347.10	0.00422445	0.000941834	4.48534	7.27968e-06	0.000356432	1.00293	MXD3	protein_coding
ENSG00000104218.14	-0.00223618	0.00049876	-4.48348	7.34357e-06	0.000358951	0.998451	CSPP1	protein_coding
ENSG00000276651.1	0.00196604	0.000438546	4.48309	7.35698e-06	0.000358998	1.00136	AC007950.2	lincRNA
ENSG00000185607.5	0.00471653	0.00105242	4.48161	7.40813e-06	0.000360884	1.00327	ACTBP7	processed_pseudogene
ENSG00000237637.1	0.00350631	0.000782677	4.4799	7.46794e-06	0.000363184	1.00243	FRY-AS1	antisense
ENSG00000130787.13	-0.00332155	0.000741604	-4.47887	7.50409e-06	0.000364327	0.9977	HIP1R	protein_coding
ENSG00000177191.2	0.00454926	0.00101587	4.4782	7.52741e-06	0.000364845	1.00316	B3GNT8	protein_coding
ENSG00000058799.14	0.00235545	0.000526059	4.47754	7.55087e-06	0.000365368	1.00163	YIPF1	protein_coding
ENSG00000198189.10	0.00367872	0.000822345	4.47345	7.69685e-06	0.000371808	1.00255	HSD17B11	protein_coding
ENSG00000163563.7	0.00459134	0.00102661	4.47232	7.73764e-06	0.000373153	1.00319	MNDA	protein_coding
ENSG00000143367.15	0.00352373	0.000788029	4.47157	7.76468e-06	0.000373832	1.00245	TUFT1	protein_coding
ENSG00000259488.2	0.00831583	0.00185994	4.47101	7.78504e-06	0.000374188	1.00578	AC023355.1	antisense
ENSG00000198818.9	0.00226678	0.000507071	4.47034	7.80966e-06	0.000374747	1.00157	SFT2D1	protein_coding
ENSG00000238061.2	0.00225832	0.000505354	4.46879	7.86627e-06	0.000376332	1.00157	AL356273.2	processed_pseudogene
ENSG00000271888.1	0.00541332	0.00121138	4.46872	7.86879e-06	0.000376332	1.00376	AL136162.1	lincRNA
ENSG00000163931.15	0.0035035	0.000784176	4.46775	7.90477e-06	0.000377427	1.00243	TKT	protein_coding
ENSG00000166439.5	0.0020437	0.000457626	4.46587	7.97423e-06	0.000380114	1.00142	RNF169	protein_coding
ENSG00000218809.1	0.00472708	0.001059	4.46373	8.05457e-06	0.00038331	1.00328	AL391903.1	unprocessed_pseudogene
ENSG00000083168.10	0.00197243	0.000441923	4.46329	8.0711e-06	0.000383464	1.00137	KAT6A	protein_coding
ENSG00000156026.14	0.00195596	0.000438578	4.45976	8.20503e-06	0.000389186	1.00136	MCU	protein_coding
ENSG00000047644.18	0.00315362	0.000707324	4.45853	8.25241e-06	0.00039079	1.00219	WWC3	protein_coding
ENSG00000160961.11	0.00196546	0.000440918	4.45766	8.28575e-06	0.000391726	1.00136	ZNF333	protein_coding
ENSG00000110876.9	0.0034171	0.000766692	4.45694	8.31373e-06	0.000392405	1.00237	SELPLG	protein_coding
ENSG00000114316.12	0.0023158	0.000519889	4.45441	8.4124e-06	0.000396414	1.00161	USP4	protein_coding
ENSG00000100865.14	0.00152161	0.000341756	4.45232	8.49466e-06	0.000399637	1.00106	CINP	protein_coding
ENSG00000141854.9	0.00545148	0.00122452	4.45193	8.50999e-06	0.000399706	1.00379	MISP3	protein_coding
ENSG00000143384.12	0.00311692	0.000700203	4.45145	8.52921e-06	0.000399957	1.00216	MCL1	protein_coding
ENSG00000276533.1	0.00312865	0.000704036	4.44388	8.83525e-06	0.000413636	1.00217	AC018926.2	sense_intronic
ENSG00000261218.5	0.00400256	0.000900806	4.44331	8.85854e-06	0.000414054	1.00278	AC099524.1	lincRNA
ENSG00000137261.13	0.00577201	0.00129919	4.44278	8.88057e-06	0.000414412	1.00401	KIAA0319	protein_coding
ENSG00000228666.1	0.00283745	0.000638821	4.44169	8.92541e-06	0.000415832	1.00197	KRT18P1	processed_pseudogene
ENSG00000196850.5	0.00216393	0.00048727	4.44093	8.95726e-06	0.000416643	1.0015	PPTC7	protein_coding
ENSG00000272911.1	0.00283141	0.000637638	4.44047	8.97627e-06	0.000416854	1.00196	AC005696.3	lincRNA
ENSG00000275014.1	0.00178915	0.00040309	4.43858	9.05554e-06	0.000419193	1.00124	RN7SL166P	misc_RNA
ENSG00000250197.1	0.00267643	0.000602992	4.43857	9.05571e-06	0.000419193	1.00186	HMGN1P15	processed_pseudogene
ENSG00000174197.16	-0.00189486	0.000427464	-4.43278	9.30249e-06	0.000429927	0.998687	MGA	protein_coding
ENSG00000162511.7	0.00290802	0.000656311	4.43085	9.38629e-06	0.000433106	1.00202	LAPTM5	protein_coding
ENSG00000104870.12	0.00366306	0.000826979	4.42944	9.4477e-06	0.000434139	1.00254	FCGRT	protein_coding
ENSG00000256280.1	0.0030088	0.000679407	4.42857	9.4858e-06	0.000434139	1.00209	AP006289.1	processed_pseudogene
ENSG00000115325.13	0.00283985	0.000641109	4.4296	9.44097e-06	0.000434139	1.00197	DOK1	protein_coding
ENSG00000273382.1	0.00337073	0.000761142	4.42851	9.48858e-06	0.000434139	1.00234	AL356488.3	antisense
ENSG00000131944.9	0.0024627	0.000556131	4.42827	9.49901e-06	0.000434139	1.00171	FAAP24	protein_coding
ENSG00000146909.7	-0.0014994	0.000338534	-4.42911	9.46246e-06	0.000434139	0.998961	NOM1	protein_coding
ENSG00000125753.13	0.00352811	0.000797085	4.42627	9.58769e-06	0.000434798	1.00245	VASP	protein_coding
ENSG00000137177.19	0.00330658	0.000746852	4.42736	9.53954e-06	0.000434798	1.00229	KIF13A	protein_coding
ENSG00000156738.17	-0.00667478	0.00150805	-4.42609	9.59565e-06	0.000434798	0.995384	MS4A1	protein_coding
ENSG00000211766.1	-0.00315845	0.00071357	-4.42627	9.58765e-06	0.000434798	0.997813	TRBJ2-2P	TR_J_gene
ENSG00000169403.11	0.00397116	0.000897003	4.42714	9.5491e-06	0.000434798	1.00276	PTAFR	protein_coding
ENSG00000180901.10	0.00196721	0.000444511	4.42557	9.61897e-06	0.000434798	1.00136	KCTD2	protein_coding
ENSG00000066185.12	0.00337617	0.000762854	4.42571	9.61266e-06	0.000434798	1.00234	ZMYND12	protein_coding
ENSG00000139112.10	0.00342208	0.000773607	4.42354	9.70945e-06	0.000438202	1.00237	GABARAPL1	protein_coding
ENSG00000124181.14	-0.00287683	0.000650452	-4.42282	9.7419e-06	0.000438294	0.998008	PLCG1	protein_coding
ENSG00000160712.12	0.0032925	0.000744419	4.42291	9.73818e-06	0.000438294	1.00228	IL6R	protein_coding
ENSG00000254302.1	0.00417102	0.000943651	4.42009	9.86584e-06	0.000443179	1.0029	AC087855.2	lincRNA
ENSG00000165801.9	0.00449318	0.00101671	4.41934	9.90031e-06	0.000444036	1.00312	ARHGEF40	protein_coding
ENSG00000260563.3	0.00296895	0.000671913	4.41866	9.93159e-06	0.000444747	1.00206	AC132872.1	lincRNA
ENSG00000168591.15	0.0023406	0.000529873	4.41728	9.99494e-06	0.000446198	1.00162	TMUB2	protein_coding
ENSG00000148606.12	-0.00142088	0.000321662	-4.41731	9.99368e-06	0.000446198	0.999016	POLR3A	protein_coding
ENSG00000198128.4	0.00371268	0.000840694	4.4162	1.0045e-05	0.00044774	1.00258	OR2L3	protein_coding
ENSG00000174697.4	0.00869934	0.0019704	4.41501	1.01004e-05	0.000448855	1.00605	LEP	protein_coding
ENSG00000125538.11	0.00422289	0.000956488	4.415	1.01011e-05	0.000448855	1.00293	IL1B	protein_coding
ENSG00000112715.21	0.00377395	0.000854909	4.41444	1.01271e-05	0.000449318	1.00262	VEGFA	protein_coding
ENSG00000167995.15	0.00410506	0.000930228	4.41296	1.01966e-05	0.000451703	1.00285	BEST1	protein_coding
ENSG00000167552.13	0.00381156	0.000864125	4.41088	1.02949e-05	0.000454513	1.00265	TUBA1A	protein_coding
ENSG00000168092.13	0.00164824	0.000373697	4.41063	1.03073e-05	0.000454513	1.00114	PAFAH1B2	protein_coding
ENSG00000145819.16	0.00338135	0.000766547	4.41114	1.02827e-05	0.000454513	1.00235	ARHGAP26	protein_coding
ENSG00000178726.6	0.00564073	0.00128004	4.40669	1.04963e-05	0.000462144	1.00392	THBD	protein_coding
ENSG00000134463.14	0.00550638	0.00125	4.4051	1.05737e-05	0.000464839	1.00382	ECHDC3	protein_coding
ENSG00000198363.17	0.00384191	0.000872424	4.40372	1.06413e-05	0.000467098	1.00267	ASPH	protein_coding
ENSG00000200834.1	0.00342016	0.000777113	4.40111	1.07698e-05	0.000472023	1.00237	RF00019	misc_RNA
ENSG00000145191.13	-0.00191276	0.000434724	-4.39994	1.08283e-05	0.000473865	0.998675	EIF2B5	protein_coding
ENSG00000132589.15	0.00405423	0.000921592	4.39916	1.08668e-05	0.000474112	1.00281	FLOT2	protein_coding
ENSG00000130177.15	-0.00254365	0.000578198	-4.39927	1.08614e-05	0.000474112	0.998238	CDC16	protein_coding
ENSG00000100055.20	0.00279688	0.000636056	4.39722	1.09647e-05	0.000477661	1.00194	CYTH4	protein_coding
ENSG00000267498.1	0.00463596	0.00105449	4.39639	1.10068e-05	0.000478772	1.00322	AC007786.1	lincRNA
ENSG00000266850.1	0.0034281	0.000779913	4.39549	1.10522e-05	0.00048002	1.00238	AC090912.2	antisense
ENSG00000137502.9	-0.00391043	0.000890161	-4.39295	1.11825e-05	0.000484949	0.997293	RAB30	protein_coding
ENSG00000274988.1	0.00494458	0.00112652	4.38924	1.13745e-05	0.000492536	1.00343	MIR6876	miRNA
ENSG00000115761.15	-0.00165828	0.000377847	-4.38876	1.13999e-05	0.000492894	0.998851	NOL10	protein_coding
ENSG00000260550.2	0.00686128	0.00156384	4.38744	1.1469e-05	0.00049306	1.00477	AC136618.1	lincRNA
ENSG00000156675.15	0.00345591	0.000787691	4.38739	1.14721e-05	0.00049306	1.0024	RAB11FIP1	protein_coding
ENSG00000225591.2	-0.00260725	0.000594249	-4.38748	1.14674e-05	0.00049306	0.998194	BX248409.1	processed_pseudogene
ENSG00000214975.4	0.00739279	0.00168471	4.38817	1.14311e-05	0.00049306	1.00514	PPIAP29	processed_pseudogene
ENSG00000147459.17	0.00368755	0.000840739	4.38608	1.15411e-05	0.000495286	1.00256	DOCK5	protein_coding
ENSG00000116127.17	-0.00234605	0.000535034	-4.38486	1.16062e-05	0.000497291	0.998375	ALMS1	protein_coding
ENSG00000135363.11	0.00322392	0.00073529	4.38456	1.16223e-05	0.000497291	1.00224	LMO2	protein_coding
ENSG00000165029.15	0.00543955	0.00124107	4.38293	1.17092e-05	0.00050027	1.00378	ABCA1	protein_coding
ENSG00000176095.11	0.0029111	0.000664529	4.3807	1.183e-05	0.000504268	1.00202	IP6K1	protein_coding
ENSG00000102921.7	0.002491	0.000568649	4.38055	1.18378e-05	0.000504268	1.00173	N4BP1	protein_coding
ENSG00000133028.11	-0.00120783	0.000275973	-4.37662	1.20532e-05	0.000512686	0.999163	SCO1	protein_coding
ENSG00000143748.17	-0.00176586	0.000403571	-4.3756	1.21099e-05	0.000514341	0.998777	NVL	protein_coding
ENSG00000150048.10	0.00377102	0.000862002	4.37472	1.21588e-05	0.000515657	1.00262	CLEC1A	protein_coding
ENSG00000076258.9	-0.00263079	0.000601943	-4.3705	1.23964e-05	0.000520195	0.998178	FMO4	protein_coding
ENSG00000083223.17	0.00295079	0.000675197	4.37026	1.24101e-05	0.000520195	1.00205	TUT7	protein_coding
ENSG00000197965.11	0.00465085	0.00106407	4.3708	1.23792e-05	0.000520195	1.00323	MPZL1	protein_coding
ENSG00000163803.12	0.00589362	0.00134838	4.37089	1.2374e-05	0.000520195	1.00409	PLB1	protein_coding
ENSG00000143862.7	0.00277475	0.000634869	4.37058	1.23915e-05	0.000520195	1.00193	ARL8A	protein_coding
ENSG00000183255.11	0.00234788	0.000537014	4.37211	1.23053e-05	0.000520195	1.00163	PTTG1IP	protein_coding
ENSG00000114573.9	0.00305431	0.000698769	4.37099	1.23684e-05	0.000520195	1.00212	ATP6V1A	protein_coding
ENSG00000138764.14	0.00275387	0.000629966	4.37146	1.23419e-05	0.000520195	1.00191	CCNG2	protein_coding
ENSG00000204713.10	0.00180742	0.000413613	4.36983	1.24342e-05	0.000520448	1.00125	TRIM27	protein_coding
ENSG00000084676.15	0.00253091	0.000579374	4.36836	1.25182e-05	0.000523206	1.00176	NCOA1	protein_coding
ENSG00000109381.19	0.00235494	0.000539148	4.3679	1.25446e-05	0.000523551	1.00163	ELF2	protein_coding
ENSG00000241878.11	0.00375952	0.000861206	4.36541	1.26883e-05	0.000528014	1.00261	PISD	protein_coding
ENSG00000160285.14	-0.00292355	0.000669755	-4.3651	1.27065e-05	0.000528014	0.997976	LSS	protein_coding
ENSG00000276418.5	-0.00713957	0.00163547	-4.36545	1.26859e-05	0.000528014	0.995063	AC036214.3	protein_coding
ENSG00000235706.7	0.00255429	0.000585265	4.36434	1.27509e-05	0.000528337	1.00177	DICER1-AS1	antisense
ENSG00000185261.14	0.00301551	0.000690933	4.36441	1.27469e-05	0.000528337	1.00209	KIAA0825	protein_coding
ENSG00000111647.12	0.00284863	0.000652898	4.36306	1.28255e-05	0.000529149	1.00198	UHRF1BP1L	protein_coding
ENSG00000276136.1	0.00259141	0.000593937	4.36311	1.28227e-05	0.000529149	1.0018	AC016957.2	lincRNA
ENSG00000169062.14	-0.00178573	0.00040927	-4.36321	1.28165e-05	0.000529149	0.998763	UPF3A	protein_coding
ENSG00000066294.14	-0.00235085	0.000539011	-4.36142	1.29221e-05	0.000532372	0.998372	CD84	protein_coding
ENSG00000180549.7	0.0041754	0.000957421	4.36109	1.29415e-05	0.000532412	1.0029	FUT7	protein_coding
ENSG00000004534.14	-0.00205537	0.000471358	-4.36052	1.29755e-05	0.000532752	0.998576	RBM6	protein_coding
ENSG00000207763.1	0.00498637	0.00114358	4.36033	1.29867e-05	0.000532752	1.00346	MIR617	miRNA
ENSG00000112096.17	0.00403006	0.000924464	4.35935	1.3045e-05	0.000534382	1.0028	SOD2	protein_coding
ENSG00000087206.16	0.00201519	0.000462325	4.35883	1.30759e-05	0.000534888	1.0014	UIMC1	protein_coding
ENSG00000119682.16	0.00211861	0.000486152	4.35792	1.31302e-05	0.000536348	1.00147	AREL1	protein_coding
ENSG00000197405.7	0.00439788	0.00100976	4.35539	1.32829e-05	0.000541053	1.00305	C5AR1	protein_coding
ENSG00000265669.1	0.00281102	0.00064538	4.35561	1.32699e-05	0.000541053	1.00195	MIR548AJ1	miRNA
ENSG00000101868.10	-0.00235148	0.000540021	-4.35443	1.33411e-05	0.000542656	0.998371	POLA1	protein_coding
ENSG00000277602.1	0.00386986	0.000889531	4.35045	1.35861e-05	0.000551843	1.00269	AC005363.2	lincRNA
ENSG00000109220.10	0.00257318	0.0005916	4.34951	1.36439e-05	0.000553413	1.00179	CHIC2	protein_coding
ENSG00000144228.8	0.00348696	0.000801964	4.34803	1.37367e-05	0.000556086	1.00242	SPOPL	protein_coding
ENSG00000181192.11	0.00190792	0.000438852	4.34753	1.37676e-05	0.000556086	1.00132	DHTKD1	protein_coding
ENSG00000182022.17	0.0036617	0.000842192	4.34782	1.375e-05	0.000556086	1.00254	CHST15	protein_coding
ENSG00000131873.6	0.00329236	0.000757474	4.3465	1.3833e-05	0.000557944	1.00228	CHSY1	protein_coding
ENSG00000166130.14	0.00444772	0.0010236	4.34515	1.39181e-05	0.000559348	1.00309	IKBIP	protein_coding
ENSG00000136689.18	0.00428091	0.00098522	4.34513	1.39195e-05	0.000559348	1.00297	IL1RN	protein_coding
ENSG00000041802.10	-0.00223762	0.000514992	-4.34496	1.39304e-05	0.000559348	0.99845	LSG1	protein_coding
ENSG00000113263.12	-0.00254152	0.000584967	-4.34472	1.39454e-05	0.000559348	0.99824	ITK	protein_coding
ENSG00000165209.18	-0.00369188	0.000849883	-4.34399	1.3992e-05	0.000560437	0.997444	STRBP	protein_coding
ENSG00000115306.15	-0.00275943	0.000635339	-4.34324	1.40394e-05	0.000561031	0.998089	SPTBN1	protein_coding
ENSG00000136048.13	0.00234877	0.000540798	4.34315	1.40457e-05	0.000561031	1.00163	DRAM1	protein_coding
ENSG00000171236.9	0.00471282	0.00108543	4.3419	1.41257e-05	0.000563026	1.00327	LRG1	protein_coding
ENSG00000285667.1	0.00240601	0.000554156	4.34176	1.41347e-05	0.000563026	1.00167	AC012291.2	lincRNA
ENSG00000141562.17	0.00258856	0.000596466	4.33982	1.42598e-05	0.000567224	1.0018	NARF	protein_coding
ENSG00000270550.1	-0.00869586	0.00200448	-4.33822	1.43644e-05	0.000569815	0.993991	IGHV3-30	IG_V_gene
ENSG00000151151.5	0.0043501	0.0010027	4.33839	1.43531e-05	0.000569815	1.00302	IPMK	protein_coding
ENSG00000184226.14	-0.00775589	0.001788	-4.33774	1.43953e-05	0.000570254	0.994638	PCDH9	protein_coding
ENSG00000135842.16	0.00429798	0.000991014	4.33695	1.44471e-05	0.000571523	1.00298	FAM129A	protein_coding
ENSG00000276900.1	0.0044722	0.00103159	4.33524	1.45601e-05	0.000575205	1.0031	AC023157.3	antisense
ENSG00000115507.9	0.00725688	0.00167426	4.33437	1.46177e-05	0.000576689	1.00504	OTX1	protein_coding
ENSG00000262332.1	0.00633397	0.00146146	4.33399	1.46432e-05	0.000576905	1.0044	AC136624.1	antisense
ENSG00000107738.19	0.00347312	0.000801721	4.33208	1.4771e-05	0.000581146	1.00241	VSIR	protein_coding
ENSG00000157551.18	0.00475017	0.00109698	4.33023	1.48953e-05	0.000585239	1.0033	KCNJ15	protein_coding
ENSG00000065559.14	0.00280158	0.00064714	4.32917	1.4967e-05	0.000587258	1.00194	MAP2K4	protein_coding
ENSG00000143878.9	0.00375951	0.000868615	4.32816	1.50357e-05	0.00058797	1.00261	RHOB	protein_coding
ENSG00000096063.15	0.00343874	0.000794532	4.32801	1.50464e-05	0.00058797	1.00239	SRPK1	protein_coding
ENSG00000120910.14	-0.00290158	0.000670327	-4.32861	1.50056e-05	0.00058797	0.997991	PPP3CC	protein_coding
ENSG00000123684.12	0.00276809	0.00063971	4.3271	1.51082e-05	0.000588791	1.00192	LPGAT1	protein_coding
ENSG00000250017.1	0.00293583	0.00067843	4.32739	1.50889e-05	0.000588791	1.00204	AC117529.1	processed_pseudogene
ENSG00000117676.13	0.00262795	0.000607405	4.32652	1.51487e-05	0.000589572	1.00182	RPS6KA1	protein_coding
ENSG00000139178.10	0.00294066	0.000680538	4.32108	1.5527e-05	0.000603482	1.00204	C1RL	protein_coding
ENSG00000233527.8	-0.00137012	0.000317118	-4.32055	1.55644e-05	0.0006038	0.999051	ZNF529-AS1	antisense
ENSG00000132300.18	-0.00215784	0.000499457	-4.32037	1.55771e-05	0.0006038	0.998505	PTCD3	protein_coding
ENSG00000125827.8	0.00294036	0.000680705	4.31958	1.56326e-05	0.000604357	1.00204	TMX4	protein_coding
ENSG00000240527.1	0.00446898	0.00103462	4.31942	1.56439e-05	0.000604357	1.0031	AL365273.1	sense_intronic
ENSG00000139517.8	-0.00218543	0.000505971	-4.31927	1.56543e-05	0.000604357	0.998486	LNX2	protein_coding
ENSG00000250995.1	0.00477085	0.00110492	4.31783	1.57573e-05	0.00060671	1.00331	AL391280.1	processed_pseudogene
ENSG00000176160.10	-0.00330402	0.000765159	-4.31808	1.57392e-05	0.00060671	0.997712	HSF5	protein_coding
ENSG00000281005.1	0.00256777	0.00059474	4.31746	1.57833e-05	0.000606898	1.00178	LINC00921	lincRNA
ENSG00000147124.12	-0.00172015	0.000398962	-4.31157	1.62101e-05	0.000622481	0.998808	ZNF41	protein_coding
ENSG00000124571.17	-0.0019192	0.000445239	-4.31048	1.62897e-05	0.000624706	0.998671	XPO5	protein_coding
ENSG00000101236.16	0.00496608	0.00115219	4.31012	1.63167e-05	0.000624911	1.00345	RNF24	protein_coding
ENSG00000181220.16	0.00328302	0.000761754	4.30982	1.63389e-05	0.000624931	1.00228	ZNF746	protein_coding
ENSG00000230492.1	0.00446163	0.0010353	4.30952	1.63608e-05	0.000624939	1.0031	AL049651.1	antisense
ENSG00000282602.1	0.00438061	0.00101704	4.30722	1.65322e-05	0.00063065	1.00304	Z82244.2	lincRNA
ENSG00000187475.5	0.004789	0.00111204	4.3065	1.65857e-05	0.000631858	1.00332	HIST1H1T	protein_coding
ENSG00000198060.9	0.0017655	0.000410021	4.30586	1.66335e-05	0.000632842	1.00122	2023-03-05	protein_coding
ENSG00000110448.10	-0.00379317	0.000881028	-4.30539	1.66695e-05	0.000633376	0.997374	CD5	protein_coding
ENSG00000102010.14	0.00628209	0.00145948	4.30433	1.67491e-05	0.000635561	1.00436	BMX	protein_coding
ENSG00000258819.1	0.00618878	0.00143796	4.30385	1.67853e-05	0.000636098	1.0043	LINC02289	lincRNA
ENSG00000111321.10	0.00352722	0.000819929	4.30186	1.69369e-05	0.00064069	1.00245	LTBR	protein_coding
ENSG00000283602.1	0.00425281	0.000988639	4.30168	1.69509e-05	0.00064069	1.00295	AC116353.5	transcribed_unitary_pseudogene
ENSG00000125245.12	-0.00505114	0.00117447	-4.30079	1.70187e-05	0.000642411	0.996505	GPR18	protein_coding
ENSG00000111424.10	0.00373391	0.000868416	4.29968	1.71044e-05	0.000644802	1.00259	VDR	protein_coding
ENSG00000164506.14	0.00306092	0.000712093	4.29848	1.71971e-05	0.000647451	1.00212	STXBP5	protein_coding
ENSG00000279873.2	0.00320712	0.000746205	4.29791	1.72415e-05	0.000648277	1.00223	LINC01126	lincRNA
ENSG00000173638.18	0.00440192	0.00102443	4.29695	1.73166e-05	0.000650251	1.00306	SLC19A1	protein_coding
ENSG00000249138.1	0.00525008	0.00122235	4.29509	1.74624e-05	0.000653699	1.00365	SLED1	transcribed_processed_pseudogene
ENSG00000101916.11	0.00358257	0.000834144	4.29491	1.74764e-05	0.000653699	1.00249	TLR8	protein_coding
ENSG00000138772.12	0.00635555	0.00147964	4.29534	1.74427e-05	0.000653699	1.00442	ANXA3	protein_coding
ENSG00000273141.1	0.00620922	0.00144657	4.29237	1.76773e-05	0.000659501	1.00431	AP001269.4	antisense
ENSG00000166272.17	0.00178106	0.000414919	4.29256	1.76626e-05	0.000659501	1.00124	WBP1L	protein_coding
ENSG00000108506.12	-0.00161869	0.000377231	-4.29098	1.77887e-05	0.000661946	0.998879	INTS2	protein_coding
ENSG00000177105.9	0.00363955	0.000848171	4.29105	1.7783e-05	0.000661946	1.00253	RHOG	protein_coding
ENSG00000220323.4	0.0028772	0.000670646	4.29019	1.78518e-05	0.000663439	1.002	HIST2H2BD	transcribed_unprocessed_pseudogene
ENSG00000253210.1	0.00400576	0.000933925	4.28917	1.79343e-05	0.000665647	1.00278	AC040970.1	antisense
ENSG00000164576.11	0.00159978	0.000373183	4.28684	1.8123e-05	0.000671785	1.00111	SAP30L	protein_coding
ENSG00000116729.13	0.00620786	0.0014485	4.28573	1.82143e-05	0.000674302	1.00431	WLS	protein_coding
ENSG00000254554.1	0.00471706	0.00110129	4.28321	1.84212e-05	0.00068109	1.00327	AC080023.1	antisense
ENSG00000268279.4	0.00398511	0.000930549	4.28254	1.84769e-05	0.000682274	1.00277	AC090004.1	protein_coding
ENSG00000160685.13	0.00297803	0.000695629	4.28106	1.86007e-05	0.000685966	1.00207	ZBTB7B	protein_coding
ENSG00000130714.15	-0.00200106	0.000467833	-4.2773	1.89172e-05	0.000696748	0.998614	POMT1	protein_coding
ENSG00000173928.2	0.00253823	0.000593518	4.27658	1.89787e-05	0.000698123	1.00176	SWSAP1	protein_coding
ENSG00000155561.14	-0.00221087	0.000517053	-4.27592	1.90353e-05	0.000699312	0.998469	NUP205	protein_coding
ENSG00000169967.16	0.00296254	0.000693293	4.27313	1.92745e-05	0.000707198	1.00206	MAP3K2	protein_coding
ENSG00000092036.18	0.00390148	0.000913201	4.27232	1.93452e-05	0.000708891	1.00271	HAUS4	protein_coding
ENSG00000100330.15	0.0030195	0.000707189	4.26972	1.9572e-05	0.000713006	1.0021	MTMR3	protein_coding
ENSG00000258890.6	-0.00188148	0.000440566	-4.2706	1.94945e-05	0.000713006	0.998697	CEP95	protein_coding
ENSG00000261596.2	0.00316379	0.000741033	4.26943	1.95971e-05	0.000713006	1.0022	AC005632.2	sense_intronic
ENSG00000141401.11	0.00330523	0.000774127	4.26962	1.95806e-05	0.000713006	1.00229	IMPA2	protein_coding
ENSG00000135905.19	-0.00243054	0.000569285	-4.26945	1.95952e-05	0.000713006	0.998317	DOCK10	protein_coding
ENSG00000158710.14	0.00367954	0.000861853	4.26933	1.96059e-05	0.000713006	1.00255	TAGLN2	protein_coding
ENSG00000056558.10	-0.002998	0.000702312	-4.26876	1.96561e-05	0.000713933	0.997924	TRAF1	protein_coding
ENSG00000073910.21	0.00301683	0.000707075	4.26664	1.9844e-05	0.00071985	1.00209	FRY	protein_coding
ENSG00000153487.12	0.00172039	0.000403264	4.26617	1.9886e-05	0.000720468	1.00119	ING1	protein_coding
ENSG00000279447.1	0.0059756	0.00140145	4.26387	2.00916e-05	0.000724654	1.00415	AL118508.4	TEC
ENSG00000132581.9	0.00239216	0.000560964	4.26437	2.00464e-05	0.000724654	1.00166	SDF2	protein_coding
ENSG00000089902.9	0.00286753	0.00067258	4.26348	2.01272e-05	0.000724654	1.00199	RCOR1	protein_coding
ENSG00000256581.1	0.00501936	0.00117709	4.26421	2.00614e-05	0.000724654	1.00349	NLRP9P1	unprocessed_pseudogene
ENSG00000085788.13	-0.00215094	0.000504472	-4.26375	2.01027e-05	0.000724654	0.99851	DDHD2	protein_coding
ENSG00000185022.11	0.00295684	0.000693931	4.26101	2.03507e-05	0.000731789	1.00205	MAFF	protein_coding
ENSG00000168421.12	-0.00271614	0.000638222	-4.2558	2.08305e-05	0.000748107	0.998119	RHOH	protein_coding
ENSG00000273033.2	0.00332029	0.000780549	4.25379	2.10186e-05	0.000753925	1.0023	LINC02035	lincRNA
ENSG00000177663.13	0.00373922	0.000880162	4.24833	2.15371e-05	0.000768365	1.0026	IL17RA	protein_coding
ENSG00000104973.17	0.00307836	0.000724847	4.2469	2.16745e-05	0.000768365	1.00214	MED25	protein_coding
ENSG00000185591.9	0.00228351	0.000537741	4.24649	2.17142e-05	0.000768365	1.00158	SP1	protein_coding
ENSG00000170006.11	0.00298851	0.000703504	4.24803	2.15654e-05	0.000768365	1.00207	TMEM154	protein_coding
ENSG00000158825.5	0.00474983	0.00111846	4.24676	2.16881e-05	0.000768365	1.0033	CDA	protein_coding
ENSG00000173083.14	0.00296331	0.000697583	4.24797	2.15717e-05	0.000768365	1.00206	HPSE	protein_coding
ENSG00000118454.12	-0.00290907	0.000684977	-4.24696	2.16689e-05	0.000768365	0.997986	ANKRD13C	protein_coding
ENSG00000114626.17	0.00436537	0.00102761	4.24809	2.15597e-05	0.000768365	1.00303	ABTB1	protein_coding
ENSG00000237772.1	0.00420272	0.000989119	4.24896	2.14769e-05	0.000768365	1.00292	AC092620.1	lincRNA
ENSG00000244361.1	0.00650955	0.00153263	4.24732	2.16343e-05	0.000768365	1.00452	RPL30P7	processed_pseudogene
ENSG00000119121.21	0.0040246	0.00094765	4.24693	2.16721e-05	0.000768365	1.00279	TRPM6	protein_coding
ENSG00000069399.14	0.00433235	0.00102063	4.24478	2.1881e-05	0.000773049	1.00301	BCL3	protein_coding
ENSG00000279491.1	0.00263923	0.000621787	4.24458	2.19002e-05	0.000773049	1.00183	AP003733.4	TEC
ENSG00000102218.5	0.00348552	0.000821584	4.24244	2.21105e-05	0.000779518	1.00242	RP2	protein_coding
ENSG00000130348.11	-0.00277887	0.000655112	-4.24183	2.21702e-05	0.000780666	0.998076	QRSL1	protein_coding
ENSG00000236463.1	-0.00404761	0.000954843	-4.23903	2.24486e-05	0.000789507	0.997198	LINC00427	lincRNA
ENSG00000137414.5	0.00361495	0.000852992	4.23797	2.2555e-05	0.000792282	1.00251	FAM8A1	protein_coding
ENSG00000169087.10	0.00223801	0.000528159	4.23737	2.26149e-05	0.000792714	1.00155	HSPBAP1	protein_coding
ENSG00000035664.11	0.0038044	0.000897837	4.2373	2.26223e-05	0.000792714	1.00264	DAPK2	protein_coding
ENSG00000217083.1	0.00584888	0.0013816	4.23343	2.30158e-05	0.000805526	1.00406	MTCO2P33	processed_pseudogene
ENSG00000234199.2	0.00380247	0.000898311	4.23291	2.30685e-05	0.000806392	1.00264	LINC01191	lincRNA
ENSG00000134815.18	0.00353852	0.000836142	4.23196	2.31665e-05	0.000808837	1.00246	DHX34	protein_coding
ENSG00000172071.11	-0.00251023	0.000593204	-4.23165	2.31985e-05	0.000808975	0.998262	EIF2AK3	protein_coding
ENSG00000171049.8	0.0047899	0.00113235	4.23004	2.33645e-05	0.00081378	1.00333	FPR2	protein_coding
ENSG00000168795.4	-0.00215515	0.000509535	-4.22965	2.34054e-05	0.000814221	0.998507	ZBTB5	protein_coding
ENSG00000173171.14	0.0033904	0.000801701	4.22901	2.34725e-05	0.000815569	1.00235	MTX1	protein_coding
ENSG00000227815.2	0.00441929	0.00104513	4.22846	2.35294e-05	0.000815583	1.00307	AL359265.1	unprocessed_pseudogene
ENSG00000119979.17	0.00260632	0.000616343	4.22869	2.35057e-05	0.000815583	1.00181	FAM45A	protein_coding
ENSG00000173212.4	0.00606073	0.00143364	4.22753	2.36274e-05	0.000817996	1.00421	MAB21L3	protein_coding
ENSG00000089053.12	-0.00134136	0.000317327	-4.22707	2.36756e-05	0.000818682	0.999071	ANAPC5	protein_coding
ENSG00000066084.12	0.00239289	0.000566341	4.22517	2.38761e-05	0.00082364	1.00166	DIP2B	protein_coding
ENSG00000263790.1	-0.00321064	0.00075984	-4.22542	2.38496e-05	0.00082364	0.997777	MIR4473	miRNA
ENSG00000180304.14	0.0049035	0.0011607	4.22461	2.3935e-05	0.00082401	1.0034	OAZ2	protein_coding
ENSG00000125505.16	0.00439898	0.0010413	4.22453	2.3944e-05	0.00082401	1.00305	MBOAT7	protein_coding
ENSG00000008438.4	0.00613485	0.00145231	4.2242	2.39786e-05	0.000824217	1.00426	PGLYRP1	protein_coding
ENSG00000120306.10	0.00406608	0.000962666	4.22377	2.40252e-05	0.000824836	1.00282	CYSTM1	protein_coding
ENSG00000145041.15	-0.00182811	0.000433064	-4.22134	2.42853e-05	0.000832775	0.998734	DCAF1	protein_coding
ENSG00000179046.8	0.00295979	0.000701241	4.22079	2.4345e-05	0.000833831	1.00205	TRIML2	protein_coding
ENSG00000141279.15	0.00205396	0.000486692	4.22024	2.44044e-05	0.000834872	1.00142	NPEPPS	protein_coding
ENSG00000086300.15	0.00358603	0.000849922	4.21925	2.45122e-05	0.000837566	1.00249	SNX10	protein_coding
ENSG00000131236.16	0.00231741	0.000549364	4.21836	2.46089e-05	0.000839878	1.00161	CAP1	protein_coding
ENSG00000233806.7	-0.00304619	0.000722504	-4.21616	2.48499e-05	0.000847099	0.997891	LINC01237	processed_transcript
ENSG00000103047.7	-0.00159485	0.000378408	-4.21463	2.50185e-05	0.000851841	0.998895	TANGO6	protein_coding
ENSG00000276248.1	0.00292135	0.000693484	4.21257	2.52483e-05	0.00085865	1.00203	AL442125.1	sense_intronic
ENSG00000196305.17	-0.00227754	0.000541225	-4.20812	2.575e-05	0.000874683	0.998423	IARS	protein_coding
ENSG00000174099.11	0.00346961	0.000824689	4.20718	2.5858e-05	0.000877316	1.00241	MSRB3	protein_coding
ENSG00000159445.12	-0.00273937	0.000651271	-4.2062	2.59702e-05	0.000880089	0.998103	THEM4	protein_coding
ENSG00000185963.13	0.00228455	0.000543193	4.20579	2.60177e-05	0.000880662	1.00158	BICD2	protein_coding
ENSG00000069943.9	0.00299404	0.000712219	4.20381	2.62458e-05	0.000886302	1.00208	PIGB	protein_coding
ENSG00000112685.13	-0.00219602	0.000522379	-4.20388	2.62377e-05	0.000886302	0.998479	EXOC2	protein_coding
ENSG00000078070.12	-0.00181411	0.000431608	-4.20313	2.63249e-05	0.00088704	0.998743	MCCC1	protein_coding
ENSG00000135763.9	-0.00200398	0.000476788	-4.20309	2.63292e-05	0.00088704	0.998612	URB2	protein_coding
ENSG00000100906.10	0.0029768	0.000708632	4.20078	2.66003e-05	0.000895128	1.00207	NFKBIA	protein_coding
ENSG00000253522.6	-0.00351111	0.000836124	-4.19928	2.67771e-05	0.000897874	0.997569	MIR3142HG	lincRNA
ENSG00000237803.5	0.00540898	0.00128815	4.19903	2.68064e-05	0.000897874	1.00376	LINC00211	lincRNA
ENSG00000272914.1	0.00462644	0.00110176	4.19914	2.67934e-05	0.000897874	1.00321	AL359532.1	sense_intronic
ENSG00000211752.3	-0.00571533	0.00136087	-4.19978	2.6718e-05	0.000897874	0.996046	TRBV27	TR_V_gene
ENSG00000174840.8	-0.00109296	0.00026032	-4.19851	2.68673e-05	0.000898871	0.999243	PDE12	protein_coding
ENSG00000105355.8	0.00330728	0.000787801	4.19811	2.69147e-05	0.000899412	1.0023	PLIN3	protein_coding
ENSG00000102882.11	0.00341416	0.000813565	4.19654	2.71023e-05	0.000904635	1.00237	MAPK3	protein_coding
ENSG00000174428.16	-0.00150635	0.000358985	-4.19614	2.71503e-05	0.000905189	0.998956	GTF2IRD2B	protein_coding
ENSG00000164327.12	0.00289908	0.000691041	4.19524	2.7258e-05	0.000907729	1.00201	RICTOR	protein_coding
ENSG00000170848.15	0.00512743	0.00122295	4.19267	2.75689e-05	0.000917022	1.00356	PSG6	protein_coding
ENSG00000071575.11	-0.00298595	0.00071251	-4.19075	2.78037e-05	0.00092377	0.997932	TRIB2	protein_coding
ENSG00000105339.10	0.00376459	0.000898853	4.18821	2.81158e-05	0.00093199	1.00261	DENND3	protein_coding
ENSG00000151746.13	-0.00272027	0.000649466	-4.18847	2.80836e-05	0.00093199	0.998116	BICD1	protein_coding
ENSG00000261845.2	0.00286796	0.000684872	4.18759	2.81935e-05	0.000933493	1.00199	AC124283.1	antisense
ENSG00000070731.10	0.00418625	0.00100007	4.18595	2.83981e-05	0.000934899	1.00291	ST6GALNAC2	protein_coding
ENSG00000005893.15	0.00321465	0.000767865	4.18648	2.83319e-05	0.000934899	1.00223	LAMP2	protein_coding
ENSG00000228886.1	-0.00373803	0.000892902	-4.18639	2.83432e-05	0.000934899	0.997412	AL138963.1	lincRNA
ENSG00000236438.7	0.00521786	0.0012464	4.18636	2.83464e-05	0.000934899	1.00362	FAM157A	transcribed_unprocessed_pseudogene
ENSG00000204577.11	0.00462918	0.00110582	4.18619	2.83679e-05	0.000934899	1.00321	LILRB3	protein_coding
ENSG00000235532.1	-0.00441401	0.0010546	-4.18548	2.84566e-05	0.000935758	0.996945	LINC00402	lincRNA
ENSG00000184005.10	0.00340635	0.000813926	4.18509	2.85055e-05	0.0009363	1.00236	ST6GALNAC3	protein_coding
ENSG00000176659.8	0.00255219	0.000609924	4.18444	2.85872e-05	0.000937913	1.00177	C20orf197	lincRNA
ENSG00000240003.2	0.00331565	0.000792525	4.18366	2.86853e-05	0.000940064	1.0023	RPL7P24	processed_pseudogene
ENSG00000175711.8	0.00396262	0.000947401	4.18262	2.88167e-05	0.000940247	1.00275	B3GNTL1	protein_coding
ENSG00000163600.12	-0.00412822	0.00098688	-4.18311	2.87553e-05	0.000940247	0.997143	ICOS	protein_coding
ENSG00000012232.8	0.00300939	0.000719472	4.18277	2.87981e-05	0.000940247	1.00209	EXTL3	protein_coding
ENSG00000119535.17	0.00409107	0.000978119	4.18258	2.88213e-05	0.000940247	1.00284	CSF3R	protein_coding
ENSG00000113648.16	0.00197811	0.00047297	4.18231	2.88561e-05	0.000940317	1.00137	H2AFY	protein_coding
ENSG00000256751.5	0.00463483	0.00110847	4.1813	2.89849e-05	0.000943449	1.00322	PLBD1-AS1	antisense
ENSG00000177156.10	0.00379717	0.00090847	4.17974	2.91837e-05	0.00094885	1.00264	TALDO1	protein_coding
ENSG00000187531.13	0.00222063	0.000531749	4.17609	2.96567e-05	0.00096314	1.00154	SIRT7	protein_coding
ENSG00000232995.7	-0.00274952	0.000658586	-4.17489	2.98126e-05	0.000967116	0.998096	RGS5	antisense
ENSG00000133800.8	0.00562819	0.0013484	4.17397	2.99342e-05	0.000968879	1.00391	LYVE1	protein_coding
ENSG00000131378.13	-0.00221672	0.000531073	-4.17405	2.9923e-05	0.000968879	0.998465	RFTN1	protein_coding
ENSG00000085982.13	-0.00227217	0.000544412	-4.17361	2.99807e-05	0.000969298	0.998426	USP40	protein_coding
ENSG00000160570.13	0.0024452	0.000586068	4.17221	3.01654e-05	0.000974176	1.0017	DEDD2	protein_coding
ENSG00000259704.1	0.00400917	0.000961136	4.17129	3.02887e-05	0.000977063	1.00278	AC124248.1	sense_overlapping
ENSG00000238713.1	-0.00284272	0.00068163	-4.17047	3.03968e-05	0.00097912	0.998032	RF00019	misc_RNA
ENSG00000120949.14	0.00328477	0.000787658	4.1703	3.04203e-05	0.00097912	1.00228	TNFRSF8	protein_coding
ENSG00000285861.1	0.00453449	0.00108835	4.16637	3.09483e-05	0.000995003	1.00315	AC026991.2	antisense
ENSG00000258102.3	0.00479883	0.00115196	4.16579	3.10272e-05	0.000996429	1.00333	MAP1LC3B2	protein_coding
ENSG00000163617.10	-0.00261916	0.000628908	-4.16461	3.11889e-05	0.000999741	0.998186	CCDC191	protein_coding
ENSG00000257335.8	0.00481866	0.00115707	4.16453	3.11997e-05	0.000999741	1.00335	MGAM	protein_coding
ENSG00000135407.10	0.00391306	0.000939687	4.16422	3.12421e-05	0.00099999	1.00272	AVIL	protein_coding
ENSG00000173011.11	0.00171558	0.000412069	4.16333	3.13634e-05	0.00100276	1.00119	TADA2B	protein_coding
ENSG00000138449.10	0.00375892	0.000903038	4.16252	3.14748e-05	0.00100516	1.00261	SLC40A1	protein_coding
ENSG00000122188.12	-0.00259723	0.000623993	-4.16228	3.15081e-05	0.00100516	0.998201	LAX1	protein_coding
ENSG00000259651.2	0.00509518	0.00122508	4.15904	3.19584e-05	0.00101839	1.00354	MTCO3P23	processed_pseudogene
ENSG00000133422.12	-0.00201152	0.000483747	-4.1582	3.20763e-05	0.00102102	0.998607	MORC2	protein_coding
ENSG00000067560.10	0.00236915	0.000569885	4.15725	3.22103e-05	0.00102416	1.00164	RHOA	protein_coding
ENSG00000139211.6	-0.00300368	0.000722913	-4.15496	3.25338e-05	0.00103331	0.99792	AMIGO2	protein_coding
ENSG00000168610.14	0.00301852	0.000726688	4.1538	3.26992e-05	0.00103742	1.00209	STAT3	protein_coding
ENSG00000158769.17	0.00334236	0.000804811	4.15297	3.2819e-05	0.00104008	1.00232	F11R	protein_coding
ENSG00000105993.14	0.00198487	0.000478246	4.15031	3.3202e-05	0.00105106	1.00138	DNAJB6	protein_coding
ENSG00000109756.9	0.00283809	0.000683924	4.14972	3.32881e-05	0.00105263	1.00197	RAPGEF2	protein_coding
ENSG00000120798.16	-0.00225728	0.000544246	-4.14753	3.36083e-05	0.00105915	0.998437	NR2C1	protein_coding
ENSG00000143376.13	0.00289521	0.00069797	4.14804	3.35337e-05	0.00105915	1.00201	SNX27	protein_coding
ENSG00000135525.18	0.00361396	0.000871327	4.14765	3.35902e-05	0.00105915	1.00251	MAP7	protein_coding
ENSG00000155926.13	0.00281298	0.000678268	4.1473	3.36413e-05	0.00105915	1.00195	SLA	protein_coding
ENSG00000117139.17	0.00168308	0.000405927	4.14627	3.37933e-05	0.00106278	1.00117	KDM5B	protein_coding
ENSG00000108582.11	0.00335728	0.000810017	4.1447	3.4026e-05	0.0010666	1.00233	CPD	protein_coding
ENSG00000143365.17	0.00249174	0.000601157	4.14491	3.39941e-05	0.0010666	1.00173	RORC	protein_coding
ENSG00000112303.13	0.00509737	0.00122978	4.14495	3.39885e-05	0.0010666	1.00354	VNN2	protein_coding
ENSG00000130150.11	0.00299979	0.000723886	4.14401	3.41287e-05	0.00106866	1.00208	MOSPD2	protein_coding
ENSG00000075420.12	0.00265764	0.000641575	4.14237	3.43734e-05	0.00107516	1.00184	FNDC3B	protein_coding
ENSG00000064932.15	0.00419756	0.00101363	4.14113	3.45597e-05	0.00107965	1.00291	SBNO2	protein_coding
ENSG00000119912.16	-0.0018076	0.000436523	-4.14092	3.4592e-05	0.00107965	0.998748	IDE	protein_coding
ENSG00000262879.5	-0.00211337	0.000510441	-4.14028	3.46878e-05	0.00108147	0.998536	AC068152.1	processed_transcript
ENSG00000111300.9	-0.00170891	0.000412809	-4.13972	3.47729e-05	0.00108296	0.998816	NAA25	protein_coding
ENSG00000135318.11	-0.00546387	0.0013204	-4.13804	3.50278e-05	0.00108972	0.99622	NT5E	protein_coding
ENSG00000162402.13	-0.00191688	0.000463378	-4.13675	3.52255e-05	0.00109468	0.998672	USP24	protein_coding
ENSG00000124198.8	-0.00166204	0.000401809	-4.13639	3.52819e-05	0.00109526	0.998849	ARFGEF2	protein_coding
ENSG00000163399.15	-0.00206237	0.00049895	-4.13343	3.57392e-05	0.00110707	0.998571	ATP1A1	protein_coding
ENSG00000271646.1	0.00279202	0.000675437	4.13365	3.57048e-05	0.00110707	1.00194	AC099343.3	bidirectional_promoter_lncRNA
ENSG00000284956.1	0.0042797	0.00103565	4.13239	3.59012e-05	0.0011109	1.00297	AC107959.5	protein_coding
ENSG00000234034.1	0.00188552	0.000456406	4.13123	3.6082e-05	0.00111421	1.00131	AP000959.1	lincRNA
ENSG00000242736.1	-0.00426787	0.00103308	-4.13121	3.60857e-05	0.00111421	0.997046	TRBV1	TR_V_pseudogene
ENSG00000160055.19	0.00257206	0.000622771	4.13002	3.6273e-05	0.0011188	1.00178	TMEM234	protein_coding
ENSG00000136161.12	0.00237794	0.000576005	4.12833	3.65412e-05	0.00112587	1.00165	RCBTB2	protein_coding
ENSG00000123810.7	0.00310423	0.000752539	4.12501	3.70723e-05	0.0011398	1.00215	B9D2	protein_coding
ENSG00000200428.1	0.00270877	0.000656634	4.12524	3.70355e-05	0.0011398	1.00188	RF00019	misc_RNA
ENSG00000125354.22	-0.00213718	0.00051819	-4.12431	3.71844e-05	0.00114203	0.99852	2023-09-06	protein_coding
ENSG00000207117.1	0.00505625	0.00122663	4.12207	3.75484e-05	0.00115198	1.00351	RF00019	misc_RNA
ENSG00000067992.13	0.00218113	0.000529322	4.12061	3.77864e-05	0.00115805	1.00151	PDK3	protein_coding
ENSG00000154997.8	0.00429359	0.00104251	4.1185	3.81346e-05	0.00116748	1.00298	2023-09-14	protein_coding
ENSG00000145860.11	0.00202005	0.000490571	4.11775	3.82584e-05	0.00116983	1.0014	RNF145	protein_coding
ENSG00000109667.11	0.0031265	0.000759312	4.11755	3.82926e-05	0.00116983	1.00217	SLC2A9	protein_coding
ENSG00000243398.3	0.00364817	0.000886149	4.11688	3.84042e-05	0.001172	1.00253	RN7SL141P	misc_RNA
ENSG00000234772.1	-0.00259012	0.000629268	-4.11609	3.85362e-05	0.00117478	0.998206	LINC00412	antisense
ENSG00000111348.8	0.0022984	0.000558603	4.11455	3.87937e-05	0.00117977	1.00159	ARHGDIB	protein_coding
ENSG00000122694.15	0.00302757	0.000735869	4.11427	3.884e-05	0.00117977	1.0021	GLIPR2	protein_coding
ENSG00000134324.11	-0.00176839	0.000429832	-4.11414	3.88633e-05	0.00117977	0.998775	LPIN1	protein_coding
ENSG00000277073.1	0.00649222	0.00157784	4.11463	3.87804e-05	0.00117977	1.00451	MIR6131	miRNA
ENSG00000149177.12	0.00294006	0.000714775	4.11326	3.90103e-05	0.00118296	1.00204	PTPRJ	protein_coding
ENSG00000146842.16	-0.00211753	0.000514836	-4.11303	3.90506e-05	0.00118296	0.998533	TMEM209	protein_coding
ENSG00000087903.12	0.00396333	0.000963774	4.1123	3.91739e-05	0.00118545	1.00275	RFX2	protein_coding
ENSG00000012660.13	0.00222148	0.000540247	4.11196	3.92309e-05	0.00118593	1.00154	ELOVL5	protein_coding
ENSG00000141447.17	0.00281096	0.000683807	4.11075	3.94376e-05	0.00118969	1.00195	OSBPL1A	protein_coding
ENSG00000173334.3	0.00334276	0.000813141	4.11092	3.94079e-05	0.00118969	1.00232	TRIB1	protein_coding
ENSG00000135108.14	-0.00208669	0.00050785	-4.10887	3.97607e-05	0.00119693	0.998555	FBXO21	protein_coding
ENSG00000022567.9	0.00399264	0.000971706	4.1089	3.97555e-05	0.00119693	1.00277	SLC45A4	protein_coding
ENSG00000170832.12	0.00266404	0.000648416	4.10854	3.98177e-05	0.0011974	1.00185	USP32	protein_coding
ENSG00000167703.14	0.00346767	0.000844215	4.10757	3.99846e-05	0.00120116	1.00241	SLC43A2	protein_coding
ENSG00000139722.6	0.00270293	0.000658174	4.10672	4.0132e-05	0.00120308	1.00188	VPS37B	protein_coding
ENSG00000204482.10	0.00309349	0.000753253	4.10684	4.01103e-05	0.00120308	1.00215	LST1	protein_coding
ENSG00000143924.18	-0.00209514	0.000510422	-4.10472	4.04798e-05	0.00121225	0.998549	EML4	protein_coding
ENSG00000120278.16	-0.00439487	0.00107116	-4.10292	4.07976e-05	0.0012205	0.996958	PLEKHG1	protein_coding
ENSG00000198355.4	0.00336581	0.000820646	4.10141	4.10634e-05	0.00122426	1.00234	PIM3	protein_coding
ENSG00000273064.1	0.00220766	0.000538212	4.10185	4.09863e-05	0.00122426	1.00153	AC017083.1	antisense
ENSG00000052749.13	0.00391937	0.000955654	4.10125	4.1093e-05	0.00122426	1.00272	RRP12	protein_coding
ENSG00000188921.13	0.0022307	0.000543904	4.10128	4.10879e-05	0.00122426	1.00155	HACD4	protein_coding
ENSG00000245848.2	0.00319907	0.000780158	4.10054	4.12187e-05	0.00122673	1.00222	CEBPA	protein_coding
ENSG00000279189.1	0.00332731	0.000811705	4.09916	4.14653e-05	0.0012328	1.00231	AP003972.1	TEC
ENSG00000246541.2	0.00504375	0.00123071	4.09824	4.16307e-05	0.00123644	1.0035	AC096746.1	lincRNA
ENSG00000258831.1	0.00704702	0.00172101	4.0947	4.22722e-05	0.00125302	1.0049	AC103996.2	lincRNA
ENSG00000146166.16	0.00402328	0.000982563	4.09468	4.22756e-05	0.00125302	1.00279	LGSN	protein_coding
ENSG00000168297.15	0.00216905	0.000529763	4.09437	4.2331e-05	0.00125337	1.0015	PXK	protein_coding
ENSG00000136104.20	-0.00191708	0.000468324	-4.09348	4.24939e-05	0.0012569	0.998672	RNASEH2B	protein_coding
ENSG00000199135.1	0.00371045	0.000906543	4.09297	4.25887e-05	0.00125785	1.00258	MIR101-1	miRNA
ENSG00000254812.1	0.00250548	0.000612163	4.09284	4.2613e-05	0.00125785	1.00174	AC067930.3	antisense
ENSG00000038219.12	0.00273642	0.000668642	4.0925	4.26744e-05	0.00125837	1.0019	BOD1L1	protein_coding
ENSG00000224609.7	0.00500205	0.00122243	4.09188	4.27885e-05	0.00126045	1.00347	HSD52	processed_transcript
ENSG00000268357.1	-0.0046836	0.00114482	-4.09114	4.29265e-05	0.00126322	0.996759	VN1R81P	unprocessed_pseudogene
ENSG00000244682.7	0.00482735	0.00118029	4.08997	4.31435e-05	0.00126831	1.00335	FCGR2C	polymorphic_pseudogene
ENSG00000156671.13	0.00238047	0.000582103	4.08943	4.32443e-05	0.00126869	1.00165	SAMD8	protein_coding
ENSG00000103423.13	-0.00162829	0.000398156	-4.08958	4.3215e-05	0.00126869	0.998872	DNAJA3	protein_coding
ENSG00000233892.1	-0.00322519	0.000789004	-4.08767	4.35724e-05	0.00127702	0.997767	PAIP1P1	processed_pseudogene
ENSG00000279500.1	0.00298818	0.000731371	4.08573	4.39394e-05	0.00128646	1.00207	AC108704.2	TEC
ENSG00000160593.18	0.00286255	0.000700716	4.08518	4.40429e-05	0.00128819	1.00199	JAML	protein_coding
ENSG00000165733.7	-0.00207255	0.000507653	-4.08261	4.45326e-05	0.00130119	0.998564	BMS1	protein_coding
ENSG00000011422.11	0.00349496	0.000856426	4.08086	4.48686e-05	0.00130968	1.00243	PLAUR	protein_coding
ENSG00000136383.6	0.00558821	0.00137006	4.0788	4.52688e-05	0.00132003	1.00388	ALPK3	protein_coding
ENSG00000153064.11	-0.00527941	0.00129444	-4.07852	4.53239e-05	0.0013203	0.996347	BANK1	protein_coding
ENSG00000181409.12	0.00506458	0.001242	4.07777	4.54693e-05	0.0013232	1.00352	AATK	protein_coding
ENSG00000223949.6	0.00333976	0.000819278	4.07647	4.57244e-05	0.00132928	1.00232	ROR1-AS1	antisense
ENSG00000091317.7	0.00363494	0.000892229	4.074	4.62132e-05	0.00134079	1.00252	CMTM6	protein_coding
ENSG00000185436.11	-0.00492058	0.00120774	-4.07419	4.61738e-05	0.00134079	0.996595	IFNLR1	protein_coding
ENSG00000142208.16	0.00242031	0.000594418	4.07173	4.66658e-05	0.00134901	1.00168	AKT1	protein_coding
ENSG00000203804.4	0.00349739	0.000858845	4.0722	4.6571e-05	0.00134901	1.00243	ADAMTSL4-AS1	processed_transcript
ENSG00000076685.18	0.00253143	0.000621724	4.07164	4.66836e-05	0.00134901	1.00176	NT5C2	protein_coding
ENSG00000233369.7	0.00339725	0.000834295	4.072	4.66112e-05	0.00134901	1.00236	GTF2IP4	transcribed_processed_pseudogene
ENSG00000104763.18	0.00315307	0.00077446	4.07132	4.6748e-05	0.00134952	1.00219	ASAH1	protein_coding
ENSG00000171169.8	0.00197554	0.000485426	4.06969	4.70748e-05	0.00135623	1.00137	NAIF1	protein_coding
ENSG00000164828.17	-0.00194635	0.000478234	-4.06987	4.70398e-05	0.00135623	0.998652	SUN1	protein_coding
ENSG00000128016.5	0.00324798	0.000798141	4.06943	4.71289e-05	0.00135644	1.00225	ZFP36	protein_coding
ENSG00000113569.15	-0.00148318	0.000364618	-4.06777	4.74661e-05	0.00136478	0.998972	NUP155	protein_coding
ENSG00000228106.5	-0.0026393	0.000648876	-4.0675	4.75201e-05	0.00136497	0.998172	AL392172.1	lincRNA
ENSG00000169224.12	0.00397928	0.00097839	4.06717	4.75879e-05	0.00136556	1.00276	GCSAML	protein_coding
ENSG00000135838.13	0.00314232	0.000772847	4.0659	4.78472e-05	0.00137072	1.00218	NPL	protein_coding
ENSG00000234921.1	0.00537069	0.00132093	4.06583	4.78626e-05	0.00137072	1.00373	AC006450.2	antisense
ENSG00000134759.13	-0.00202774	0.000499097	-4.06282	4.84825e-05	0.00138572	0.998595	ELP2	protein_coding
ENSG00000230368.2	0.00483663	0.0011904	4.06302	4.84416e-05	0.00138572	1.00336	FAM41C	lincRNA
ENSG00000076513.16	0.00233699	0.000575456	4.06111	4.88398e-05	0.00139073	1.00162	ANKRD13A	protein_coding
ENSG00000261438.1	0.00355296	0.000874886	4.06106	4.88508e-05	0.00139073	1.00247	AL157394.1	sense_overlapping
ENSG00000122862.4	0.00476408	0.00117292	4.06173	4.87114e-05	0.00139073	1.00331	SRGN	protein_coding
ENSG00000118308.15	0.00262335	0.000645933	4.06133	4.8794e-05	0.00139073	1.00182	LRMP	protein_coding
ENSG00000269904.2	0.00163413	0.000402441	4.06054	4.89601e-05	0.00139209	1.00113	MAP2K4P1	transcribed_processed_pseudogene
ENSG00000166788.9	-0.00220477	0.000542997	-4.06037	4.8995e-05	0.00139209	0.998473	SAAL1	protein_coding
ENSG00000273112.1	0.00576196	0.00141939	4.05945	4.91874e-05	0.00139618	1.004	AL590385.2	processed_transcript
ENSG00000251434.1	0.00420166	0.00103515	4.05899	4.92845e-05	0.00139756	1.00292	AC104071.1	lincRNA
ENSG00000181847.11	-0.00398954	0.000983386	-4.05694	4.97205e-05	0.00140821	0.997238	TIGIT	protein_coding
ENSG00000178175.11	0.0041384	0.00102012	4.05676	4.97577e-05	0.00140821	1.00287	ZNF366	protein_coding
ENSG00000161638.10	0.00278117	0.000685766	4.05557	5.00118e-05	0.00141124	1.00193	ITGA5	protein_coding
ENSG00000079277.20	0.00254405	0.000627242	4.05593	4.99351e-05	0.00141124	1.00176	MKNK1	protein_coding
ENSG00000111110.11	0.00361063	0.000890266	4.05567	4.99903e-05	0.00141124	1.00251	PPM1H	protein_coding
ENSG00000149124.10	0.00272729	0.000672578	4.05498	5.01394e-05	0.00141346	1.00189	GLYAT	protein_coding
ENSG00000112149.9	-0.00337223	0.000831851	-4.05389	5.03732e-05	0.00141867	0.997665	CD83	protein_coding
ENSG00000125910.5	0.00344611	0.000850124	4.05365	5.04236e-05	0.0014187	1.00239	S1PR4	protein_coding
ENSG00000196352.15	0.00360542	0.000890186	4.05018	5.11772e-05	0.00143769	1.0025	CD55	protein_coding
ENSG00000177885.14	0.00251304	0.00062049	4.05009	5.11982e-05	0.00143769	1.00174	GRB2	protein_coding
ENSG00000172197.10	0.00217535	0.00053715	4.04979	5.12627e-05	0.0014381	1.00151	MBOAT1	protein_coding
ENSG00000231509.1	0.00453657	0.0011207	4.04798	5.16626e-05	0.00144791	1.00315	AL162253.1	lincRNA
ENSG00000134262.12	-0.00148687	0.000367353	-4.04752	5.17621e-05	0.00144929	0.99897	AP4B1	protein_coding
ENSG00000165115.14	0.00372916	0.000921652	4.04617	5.20619e-05	0.00145627	1.00259	KIF27	protein_coding
ENSG00000281379.2	0.0040197	0.000993601	4.04559	5.21922e-05	0.0014585	1.00279	SEPT14P19	transcribed_unprocessed_pseudogene
ENSG00000277590.1	0.00482867	0.00119371	4.04509	5.23035e-05	0.00146019	1.00335	MIR7845	miRNA
ENSG00000213754.2	-0.0033744	0.000834718	-4.04256	5.28701e-05	0.00147458	0.997664	AL356317.1	processed_pseudogene
ENSG00000126775.8	-0.00175323	0.000433804	-4.04153	5.31039e-05	0.00147968	0.998785	ATG14	protein_coding
ENSG00000130881.13	0.00469319	0.00116146	4.04077	5.32763e-05	0.00148089	1.00326	LRP3	protein_coding
ENSG00000201441.1	0.00486927	0.00120495	4.04104	5.3215e-05	0.00148089	1.00338	RNU6-646P	snRNA
ENSG00000138134.11	-0.00260566	0.000644861	-4.04066	5.33014e-05	0.00148089	0.998196	STAMBPL1	protein_coding
ENSG00000231841.1	0.00438285	0.00108527	4.0385	5.37938e-05	0.00149169	1.00304	FAM192BP	processed_pseudogene
ENSG00000189283.9	-0.00464389	0.00114987	-4.03862	5.3766e-05	0.00149169	0.996786	FHIT	protein_coding
ENSG00000140262.17	-0.00178383	0.000441847	-4.03721	5.40902e-05	0.00149274	0.998764	TCF12	protein_coding
ENSG00000119314.15	0.00218198	0.000540429	4.0375	5.40239e-05	0.00149274	1.00151	PTBP3	protein_coding
ENSG00000117868.15	-0.00196626	0.000487004	-4.03746	5.40323e-05	0.00149274	0.998638	ESYT2	protein_coding
ENSG00000147316.12	-0.00192629	0.000477131	-4.03723	5.40868e-05	0.00149274	0.998666	MCPH1	protein_coding
ENSG00000105483.17	0.00220391	0.000545837	4.03767	5.39849e-05	0.00149274	1.00153	CARD8	protein_coding
ENSG00000241839.9	0.00363529	0.000900616	4.03644	5.42676e-05	0.0014962	1.00252	PLEKHO2	protein_coding
ENSG00000274370.1	0.00419059	0.00103856	4.03498	5.46059e-05	0.00150265	1.00291	AC130371.2	lincRNA
ENSG00000089693.10	0.00263752	0.000653649	4.03507	5.45862e-05	0.00150265	1.00183	MLF2	protein_coding
ENSG00000073849.14	-0.00243773	0.00060424	-4.03438	5.47476e-05	0.00150512	0.998312	ST6GAL1	protein_coding
ENSG00000092820.17	-0.00296905	0.000736395	-4.03187	5.53349e-05	0.00151981	0.997944	EZR	protein_coding
ENSG00000159720.11	0.00283533	0.000703286	4.03155	5.54099e-05	0.00152042	1.00197	ATP6V0D1	protein_coding
ENSG00000168310.10	0.00200663	0.000497803	4.03097	5.55471e-05	0.00152274	1.00139	IRF2	protein_coding
ENSG00000197647.11	0.00233597	0.000579664	4.02987	5.58075e-05	0.00152843	1.00162	ZNF433	protein_coding
ENSG00000135956.8	0.00287357	0.000713315	4.02848	5.61387e-05	0.00153604	1.00199	TMEM127	protein_coding
ENSG00000241721.1	0.00551401	0.00136944	4.02647	5.66215e-05	0.00154573	1.00383	SUMO1P1	processed_pseudogene
ENSG00000197324.8	0.00374568	0.000930289	4.02637	5.66457e-05	0.00154573	1.0026	LRP10	protein_coding
ENSG00000121406.8	-0.0015837	0.000393336	-4.02633	5.66538e-05	0.00154573	0.998903	ZNF549	protein_coding
ENSG00000103522.15	-0.00234404	0.000582377	-4.02495	5.69875e-05	0.00154941	0.998377	IL21R	protein_coding
ENSG00000263648.1	0.00331554	0.000823761	4.02488	5.70037e-05	0.00154941	1.0023	AC005244.1	processed_pseudogene
ENSG00000163002.12	-0.0019669	0.000488629	-4.02534	5.68933e-05	0.00154941	0.998638	NUP35	protein_coding
ENSG00000065675.14	-0.00251135	0.000623953	-4.02491	5.69978e-05	0.00154941	0.998261	PRKCQ	protein_coding
ENSG00000164674.15	0.00282115	0.000701141	4.02366	5.7301e-05	0.00155603	1.00196	SYTL3	protein_coding
ENSG00000269925.1	0.00187598	0.000466423	4.02206	5.76917e-05	0.00156517	1.0013	Z98884.2	sense_intronic
ENSG00000145734.18	-0.00240195	0.000597317	-4.02123	5.78945e-05	0.00156919	0.998336	BDP1	protein_coding
ENSG00000100731.15	0.00217587	0.000541159	4.02075	5.80121e-05	0.00157084	1.00151	PCNX1	protein_coding
ENSG00000126262.4	0.00399125	0.000992714	4.02054	5.80644e-05	0.00157084	1.00277	FFAR2	protein_coding
ENSG00000170876.7	0.00242669	0.000603931	4.01816	5.86544e-05	0.00158532	1.00168	TMEM43	protein_coding
ENSG00000019144.18	0.00477327	0.00118848	4.01627	5.91268e-05	0.00159659	1.00331	PHLDB1	protein_coding
ENSG00000232412.1	0.00400093	0.000996612	4.01453	5.95648e-05	0.00160691	1.00278	AL121601.1	lincRNA
ENSG00000180221.6	0.00326024	0.000812264	4.01377	5.97565e-05	0.00161058	1.00226	TPT1P10	processed_pseudogene
ENSG00000009790.14	-0.00184634	0.000460145	-4.01251	6.00759e-05	0.00161767	0.998721	TRAF3IP3	protein_coding
ENSG00000196209.12	0.00402495	0.00100339	4.01136	6.03693e-05	0.00161802	1.00279	SIRPB2	protein_coding
ENSG00000134954.14	-0.00252171	0.000628556	-4.0119	6.02315e-05	0.00161802	0.998254	ETS1	protein_coding
ENSG00000167721.10	-0.00194574	0.000485055	-4.01139	6.03631e-05	0.00161802	0.998652	TSR1	protein_coding
ENSG00000109458.8	0.00272336	0.000678801	4.01201	6.0203e-05	0.00161802	1.00189	GAB1	protein_coding
ENSG00000275835.4	-0.00172544	0.000430124	-4.01149	6.0336e-05	0.00161802	0.998805	TUBGCP5	protein_coding
ENSG00000225062.1	0.00560604	0.00139773	4.01082	6.05085e-05	0.00162025	1.00389	CATIP-AS1	processed_transcript
ENSG00000108021.20	-0.00170825	0.000425992	-4.01006	6.07035e-05	0.00162396	0.998817	FAM208B	protein_coding
ENSG00000030066.13	-0.00144521	0.000360434	-4.00964	6.08101e-05	0.00162482	0.998999	NUP160	protein_coding
ENSG00000183023.18	0.00343039	0.000855567	4.0095	6.08482e-05	0.00162482	1.00238	SLC8A1	protein_coding
ENSG00000165555.9	0.00255881	0.000638436	4.00794	6.12505e-05	0.00163405	1.00178	NOXRED1	protein_coding
ENSG00000189091.12	-0.00165245	0.000412331	-4.00759	6.13425e-05	0.00163499	0.998855	SF3B3	protein_coding
ENSG00000264058.2	0.0050738	0.00126633	4.00668	6.15773e-05	0.00163973	1.00352	AC073508.2	protein_coding
ENSG00000068323.16	0.00307301	0.00076744	4.00424	6.22182e-05	0.00164859	1.00213	TFE3	protein_coding
ENSG00000127152.17	-0.00278737	0.000696098	-4.00428	6.22071e-05	0.00164859	0.99807	BCL11B	protein_coding
ENSG00000109920.12	-0.00171975	0.000429439	-4.00463	6.21136e-05	0.00164859	0.998809	FNBP4	protein_coding
ENSG00000150995.19	-0.00199798	0.000498983	-4.0041	6.2253e-05	0.00164859	0.998616	ITPR1	protein_coding
ENSG00000263608.2	0.00319729	0.000798499	4.00412	6.22481e-05	0.00164859	1.00222	RN7SL353P	misc_RNA
ENSG00000117090.14	-0.00283557	0.000708056	-4.00473	6.20877e-05	0.00164859	0.998036	SLAMF1	protein_coding
ENSG00000164088.17	0.00208488	0.000520766	4.00348	6.24176e-05	0.00165143	1.00145	PPM1M	protein_coding
ENSG00000250608.1	0.00260192	0.000650068	4.00254	6.26666e-05	0.00165498	1.00181	AC010210.1	processed_transcript
ENSG00000183283.15	0.0024081	0.000601621	4.00269	6.26271e-05	0.00165498	1.00167	DAZAP2	protein_coding
ENSG00000099204.19	-0.00286224	0.000715158	-4.00225	6.27427e-05	0.00165548	0.998018	ABLIM1	protein_coding
ENSG00000135334.8	0.00225744	0.000564309	4.00037	6.32436e-05	0.00166717	1.00157	AKIRIN2	protein_coding
ENSG00000156931.15	0.0022602	0.0005653	3.99823	6.38188e-05	0.00168079	1.00157	VPS8	protein_coding
ENSG00000241157.1	0.003589	0.000897734	3.99785	6.39212e-05	0.00168195	1.00249	AC104763.1	processed_pseudogene
ENSG00000138814.16	0.00214672	0.000537189	3.99621	6.43644e-05	0.00169063	1.00149	PPP3CA	protein_coding
ENSG00000164035.9	0.00374482	0.000937097	3.9962	6.4368e-05	0.00169063	1.0026	EMCN	protein_coding
ENSG00000233013.10	0.00525736	0.00131586	3.99537	6.45943e-05	0.00169503	1.00365	FAM157B	transcribed_unprocessed_pseudogene
ENSG00000174238.14	0.00253069	0.000633492	3.99482	6.47431e-05	0.00169739	1.00176	PITPNA	protein_coding
ENSG00000111728.10	-0.00313043	0.000783921	-3.99331	6.51587e-05	0.00170673	0.997833	ST8SIA1	protein_coding
ENSG00000163545.8	0.00325446	0.000815362	3.99143	6.56757e-05	0.00171871	1.00226	NUAK2	protein_coding
ENSG00000225611.1	0.00395565	0.000991098	3.99118	6.57462e-05	0.001719	1.00275	LINC02158	antisense
ENSG00000283155.1	0.00495196	0.00124085	3.9908	6.5852e-05	0.0017202	1.00344	AC116353.4	processed_transcript
ENSG00000275676.1	0.010316	0.0025856	3.9898	6.61281e-05	0.00172429	1.00718	BX005040.1	lincRNA
ENSG00000037474.14	-0.00180627	0.00045272	-3.98982	6.61231e-05	0.00172429	0.998749	NSUN2	protein_coding
ENSG00000243806.1	0.00479581	0.00120211	3.98948	6.62184e-05	0.00172509	1.00333	RPL7P18	processed_pseudogene
ENSG00000143515.16	-0.00247734	0.000621013	-3.9892	6.62966e-05	0.00172557	0.998284	ATP8B2	protein_coding
ENSG00000214274.9	0.00451799	0.00113268	3.98877	6.64161e-05	0.00172712	1.00314	ANG	protein_coding
ENSG00000160703.15	0.00322381	0.000808578	3.98701	6.69111e-05	0.00173842	1.00224	NLRX1	protein_coding
ENSG00000167470.12	0.00343773	0.000862316	3.98662	6.7021e-05	0.00173971	1.00239	MIDN	protein_coding
ENSG00000157036.12	-0.00220075	0.000552127	-3.98595	6.72106e-05	0.00174211	0.998476	EXOG	protein_coding
ENSG00000265753.2	0.00215026	0.000539499	3.98565	6.72945e-05	0.00174211	1.00149	RN7SL444P	misc_RNA
ENSG00000121057.12	-0.0018766	0.000470838	-3.98567	6.72911e-05	0.00174211	0.9987	AKAP1	protein_coding
ENSG00000134571.10	0.00442068	0.00110933	3.98501	6.74767e-05	0.00174526	1.00307	MYBPC3	protein_coding
ENSG00000211787.1	-0.0037247	0.000935155	-3.98298	6.80558e-05	0.00175866	0.997422	TRAV8-3	TR_V_gene
ENSG00000142634.12	0.00296087	0.000743475	3.98247	6.82026e-05	0.00176087	1.00205	EFHD2	protein_coding
ENSG00000112242.14	0.00241147	0.000605753	3.98095	6.86409e-05	0.0017706	1.00167	E2F3	protein_coding
ENSG00000255112.2	0.00278843	0.00070049	3.98068	6.87173e-05	0.00177099	1.00193	CHMP1B	protein_coding
ENSG00000261716.2	0.00242699	0.000609764	3.98021	6.88538e-05	0.00177292	1.00168	HIST2H2BC	transcribed_unprocessed_pseudogene
ENSG00000137207.11	0.00315917	0.000793776	3.97993	6.89348e-05	0.00177343	1.00219	YIPF3	protein_coding
ENSG00000198909.7	0.00277508	0.000697324	3.97961	6.90277e-05	0.00177403	1.00193	MAP3K3	protein_coding
ENSG00000174715.7	0.00214451	0.000538898	3.97943	6.90813e-05	0.00177403	1.00149	PPIAP72	processed_pseudogene
ENSG00000166881.9	-0.00216209	0.000543372	-3.97903	6.91979e-05	0.00177544	0.998502	NEMP1	protein_coding
ENSG00000100485.11	0.00271546	0.000682527	3.97853	6.93423e-05	0.00177599	1.00188	SOS2	protein_coding
ENSG00000155465.18	0.00283438	0.000712418	3.97854	6.93398e-05	0.00177599	1.00197	SLC7A7	protein_coding
ENSG00000178226.10	0.00425457	0.00106955	3.97792	6.95213e-05	0.00177899	1.00295	PRSS36	protein_coding
ENSG00000251230.5	0.00497175	0.00125016	3.9769	6.98196e-05	0.00178504	1.00345	MIR3945HG	lincRNA
ENSG00000228079.2	0.0045413	0.00114203	3.97651	6.99335e-05	0.00178637	1.00315	AC012368.2	lincRNA
ENSG00000133740.10	-0.00424974	0.00106926	-3.97445	7.05421e-05	0.00180032	0.997059	E2F5	protein_coding
ENSG00000129351.17	-0.00180394	0.000453959	-3.97379	7.07365e-05	0.00180369	0.99875	ILF3	protein_coding
ENSG00000146463.11	-0.00164728	0.000414565	-3.97352	7.08185e-05	0.00180418	0.998859	ZMYM4	protein_coding
ENSG00000183690.12	0.00338572	0.000852215	3.97285	7.10168e-05	0.00180726	1.00235	EFHC2	protein_coding
ENSG00000155229.20	-0.00151761	0.00038201	-3.97269	7.10647e-05	0.00180726	0.998949	MMS19	protein_coding
ENSG00000066933.15	-0.00181841	0.000457796	-3.97211	7.12385e-05	0.00181009	0.99874	MYO9A	protein_coding
ENSG00000176845.12	0.00335009	0.000843932	3.96962	7.19869e-05	0.00182749	1.00232	METRNL	protein_coding
ENSG00000264207.1	0.00446137	0.00112396	3.96934	7.20711e-05	0.00182802	1.0031	AC239868.1	antisense
ENSG00000129295.8	0.00534645	0.00134718	3.96863	7.22865e-05	0.00183187	1.00371	LRRC6	protein_coding
ENSG00000058600.15	-0.00183157	0.00046165	-3.96744	7.26484e-05	0.00183943	0.998731	POLR3E	protein_coding
ENSG00000124177.14	-0.00181232	0.000456943	-3.96618	7.30336e-05	0.00184756	0.998745	CHD6	protein_coding
ENSG00000060339.13	-0.0018541	0.000467668	-3.96457	7.35292e-05	0.00185847	0.998716	CCAR1	protein_coding
ENSG00000135404.11	0.00309108	0.000780039	3.96273	7.40991e-05	0.00186917	1.00214	CD63	protein_coding
ENSG00000151883.17	0.00235439	0.000594158	3.96257	7.41471e-05	0.00186917	1.00163	PARP8	protein_coding
ENSG00000121892.14	-0.0018495	0.000466699	-3.96294	7.40336e-05	0.00186917	0.998719	PDS5A	protein_coding
ENSG00000128536.15	-0.00325175	0.000820687	-3.96223	7.42527e-05	0.0018702	0.997749	CDHR3	protein_coding
ENSG00000213613.2	0.00308275	0.000778078	3.962	7.43234e-05	0.00187034	1.00214	RPL11P3	processed_pseudogene
ENSG00000205056.8	-0.00571143	0.00144222	-3.96017	7.48972e-05	0.00188314	0.996049	LINC02397	lincRNA
ENSG00000203747.10	0.00452454	0.0011426	3.95987	7.49909e-05	0.00188385	1.00314	FCGR3A	protein_coding
ENSG00000158792.15	0.00340893	0.000861351	3.95765	7.56897e-05	0.00189975	1.00237	SPATA2L	protein_coding
ENSG00000259182.5	0.00606842	0.00153383	3.95638	7.60939e-05	0.00190824	1.00422	AC019254.1	lincRNA
ENSG00000103037.11	-0.00195146	0.000493401	-3.95512	7.6495e-05	0.00191663	0.998648	SETD6	protein_coding
ENSG00000180376.16	-0.00253294	0.000640718	-3.95329	7.70839e-05	0.00192971	0.998246	CCDC66	protein_coding
ENSG00000100722.19	-0.00128701	0.000325636	-3.95229	7.74055e-05	0.00193608	0.999108	ZC3H14	protein_coding
ENSG00000222112.1	0.00484828	0.0012269	3.95167	7.76085e-05	0.00193807	1.00337	RN7SKP16	misc_RNA
ENSG00000144040.12	0.00227443	0.000575566	3.95163	7.76196e-05	0.00193807	1.00158	SFXN5	protein_coding
ENSG00000007923.15	-0.001747	0.000442243	-3.95032	7.80464e-05	0.00194368	0.99879	DNAJC11	protein_coding
ENSG00000005020.12	0.00359601	0.000910305	3.95034	7.80399e-05	0.00194368	1.0025	SKAP2	protein_coding
ENSG00000079616.12	-0.00246147	0.000623099	-3.95037	7.803e-05	0.00194368	0.998295	KIF22	protein_coding
ENSG00000258355.1	0.00406105	0.00102809	3.95008	7.81251e-05	0.00194396	1.00282	AC079174.1	sense_intronic
ENSG00000070718.11	-0.00245659	0.000622008	-3.94946	7.83281e-05	0.00194733	0.998299	AP3M2	protein_coding
ENSG00000221817.9	-0.00147036	0.00037234	-3.94897	7.84886e-05	0.00194964	0.998981	PPP3CB-AS1	processed_transcript
ENSG00000163257.10	-0.00172787	0.00043765	-3.94806	7.87872e-05	0.00195537	0.998803	DCAF16	protein_coding
ENSG00000187912.11	-0.00603882	0.00152986	-3.9473	7.90359e-05	0.00195986	0.995823	CLEC17A	protein_coding
ENSG00000256229.7	0.00277956	0.000704268	3.94673	7.92257e-05	0.00196288	1.00193	ZNF486	protein_coding
ENSG00000172780.16	0.00257156	0.000651631	3.94634	7.9355e-05	0.00196439	1.00178	RAB43	protein_coding
ENSG00000157404.15	0.00383733	0.000972484	3.94591	7.94972e-05	0.00196623	1.00266	KIT	protein_coding
ENSG00000270426.1	0.00236184	0.000598619	3.94549	7.9638e-05	0.00196802	1.00164	AC099343.2	sense_intronic
ENSG00000279821.1	0.0042468	0.00107645	3.94518	7.97407e-05	0.00196887	1.00295	AC145098.2	TEC
ENSG00000170190.15	0.00348274	0.000882982	3.94429	8.00353e-05	0.00197445	1.00242	SLC16A5	protein_coding
ENSG00000100938.17	0.00216239	0.000548285	3.94391	8.01628e-05	0.00197591	1.0015	GMPR2	protein_coding
ENSG00000163534.14	-0.00576071	0.00146122	-3.9424	8.06687e-05	0.00198668	0.996015	FCRL1	protein_coding
ENSG00000100721.10	-0.00724058	0.00183682	-3.9419	8.08384e-05	0.00198916	0.994994	TCL1A	protein_coding
ENSG00000164494.11	-0.0015972	0.000405267	-3.94111	8.11053e-05	0.00199403	0.998894	PDSS2	protein_coding
ENSG00000257122.5	-0.00176224	0.000447357	-3.93923	8.17445e-05	0.00200803	0.998779	RRN3P3	transcribed_unprocessed_pseudogene
ENSG00000141384.12	-0.002676	0.000679478	-3.93831	8.20564e-05	0.00201398	0.998147	TAF4B	protein_coding
ENSG00000130724.8	0.00296076	0.000751845	3.938	8.21648e-05	0.00201493	1.00205	CHMP2A	protein_coding
ENSG00000110422.11	0.00238316	0.000605293	3.93721	8.24356e-05	0.00201874	1.00165	HIPK3	protein_coding
ENSG00000275055.1	-0.00306782	0.000779202	-3.93713	8.24605e-05	0.00201874	0.997876	AC011468.5	antisense
ENSG00000249096.6	0.00380495	0.000966493	3.93686	8.25548e-05	0.00201934	1.00264	LINC02362	lincRNA
ENSG00000162739.13	-0.00261279	0.000663804	-3.93609	8.28215e-05	0.00202414	0.998191	SLAMF6	protein_coding
ENSG00000134996.11	0.00278685	0.000708075	3.93581	8.29173e-05	0.00202477	1.00193	OSTF1	protein_coding
ENSG00000188897.9	0.00569184	0.0014463	3.93547	8.30355e-05	0.00202594	1.00395	AC099489.1	protein_coding
ENSG00000228058.1	0.00483256	0.00122809	3.93502	8.31897e-05	0.00202799	1.00336	LINC01736	lincRNA
ENSG00000198585.11	0.00241818	0.000614575	3.93473	8.32914e-05	0.00202875	1.00168	NUDT16	protein_coding
ENSG00000124813.21	0.00236977	0.000602674	3.93209	8.42108e-05	0.00204941	1.00164	RUNX2	protein_coding
ENSG00000075651.15	0.00250383	0.000636947	3.93098	8.46004e-05	0.0020537	1.00174	PLD1	protein_coding
ENSG00000184677.17	-0.00193152	0.000491337	-3.93115	8.45417e-05	0.0020537	0.998662	ZBTB40	protein_coding
ENSG00000188559.14	0.00263113	0.000669265	3.93137	8.44641e-05	0.0020537	1.00183	RALGAPA2	protein_coding
ENSG00000208022.1	0.00448661	0.00114142	3.93072	8.46903e-05	0.00205415	1.00311	MIR618	miRNA
ENSG00000242516.1	0.00352175	0.000896127	3.92997	8.49566e-05	0.00205888	1.00244	LINC00960	lincRNA
ENSG00000073150.13	0.00552215	0.00140553	3.92887	8.53467e-05	0.00206659	1.00383	PANX2	protein_coding
ENSG00000272086.1	0.00360975	0.00091946	3.92595	8.63883e-05	0.00209006	1.00251	AC025181.2	lincRNA
ENSG00000172175.13	-0.00238797	0.00060834	-3.92538	8.65918e-05	0.00209323	0.998346	MALT1	protein_coding
ENSG00000066336.11	0.00387409	0.000987013	3.92506	8.67076e-05	0.00209419	1.00269	SPI1	protein_coding
ENSG00000132305.20	-0.00184001	0.000468809	-3.92487	8.67768e-05	0.00209419	0.998725	IMMT	protein_coding
ENSG00000284694.1	0.00416894	0.00106234	3.92429	8.69855e-05	0.00209747	1.00289	AL355602.1	lincRNA
ENSG00000180370.10	0.00253619	0.000646393	3.92361	8.72316e-05	0.00210061	1.00176	PAK2	protein_coding
ENSG00000244115.1	0.0041484	0.00105731	3.92353	8.72615e-05	0.00210061	1.00288	DNAJC25-GNG10	protein_coding
ENSG00000129480.12	-0.00211227	0.000538598	-3.92179	8.78921e-05	0.0021091	0.998537	DTD2	protein_coding
ENSG00000254786.1	-0.00588144	0.00149974	-3.92164	8.79493e-05	0.0021091	0.995932	AP001636.1	unprocessed_pseudogene
ENSG00000272910.1	-0.00317554	0.000809756	-3.92161	8.79596e-05	0.0021091	0.997801	AC090425.2	antisense
ENSG00000125170.10	0.00535584	0.0013657	3.92168	8.79333e-05	0.0021091	1.00372	DOK4	protein_coding
ENSG00000229625.3	0.00371274	0.000946751	3.92155	8.79795e-05	0.0021091	1.00258	AC016877.1	lincRNA
ENSG00000259293.1	0.00512819	0.00130784	3.92111	8.8141e-05	0.00210946	1.00356	LIPC-AS1	antisense
ENSG00000204261.8	0.0022459	0.000572769	3.92112	8.81374e-05	0.00210946	1.00156	PSMB8-AS1	lincRNA
ENSG00000165300.7	0.0032696	0.000834142	3.91972	8.86534e-05	0.00211996	1.00227	SLITRK5	protein_coding
ENSG00000282840.1	0.00527495	0.00134615	3.91856	8.90812e-05	0.00212843	1.00366	AC004554.2	lincRNA
ENSG00000259972.2	-0.00188519	0.000481164	-3.91799	8.92903e-05	0.00213026	0.998694	AC009120.2	processed_transcript
ENSG00000276058.1	0.00324245	0.000827589	3.91795	8.93056e-05	0.00213026	1.00225	STMN1P1	processed_pseudogene
ENSG00000259376.1	0.00451202	0.00115177	3.91747	8.94838e-05	0.00213099	1.00313	AC090907.1	antisense
ENSG00000101464.10	-0.00177363	0.000452736	-3.91757	8.94453e-05	0.00213099	0.998771	PIGU	protein_coding
ENSG00000274536.6	0.00330466	0.000843811	3.91635	8.98986e-05	0.0021391	1.00229	AL034397.3	antisense
ENSG00000042832.11	0.00429713	0.00109744	3.91558	9.01853e-05	0.00214415	1.00298	TG	protein_coding
ENSG00000105011.8	0.00467895	0.00119549	3.91384	9.08382e-05	0.00215789	1.00325	ASF1B	protein_coding
ENSG00000265115.1	0.00661093	0.00168924	3.91356	9.09446e-05	0.00215864	1.00459	AC011824.1	antisense
ENSG00000203721.6	0.00347375	0.000888381	3.9102	9.22183e-05	0.00218707	1.00241	LINC00862	lincRNA
ENSG00000180096.11	-0.00264266	0.000676159	-3.90834	9.29339e-05	0.00220224	0.99817	2023-09-01	protein_coding
ENSG00000203814.6	0.00298319	0.000763529	3.9071	9.34097e-05	0.00221169	1.00207	HIST2H2BF	protein_coding
ENSG00000101158.13	-0.0018853	0.000482882	-3.90426	9.45151e-05	0.00223603	0.998694	NELFCD	protein_coding
ENSG00000240966.3	0.00319529	0.000818982	3.90155	9.55803e-05	0.00225938	1.00222	RN7SL681P	misc_RNA
ENSG00000090376.10	0.00341544	0.000875513	3.90107	9.57675e-05	0.00226195	1.00237	IRAK3	protein_coding
ENSG00000173715.16	-0.00316876	0.000812368	-3.90064	9.59377e-05	0.00226412	0.997806	C11orf80	protein_coding
ENSG00000118564.14	0.00336392	0.000862468	3.90034	9.60569e-05	0.00226507	1.00233	FBXL5	protein_coding
ENSG00000259318.1	-0.0019354	0.000496344	-3.89932	9.64641e-05	0.00227282	0.998659	AL356801.1	processed_pseudogene
ENSG00000170989.9	-0.00295834	0.000758773	-3.89884	9.66543e-05	0.00227544	0.997952	S1PR1	protein_coding
ENSG00000147526.19	0.00178279	0.000457406	3.89762	9.71422e-05	0.00228506	1.00124	TACC1	protein_coding
ENSG00000185905.3	0.00269431	0.000691414	3.89682	9.74648e-05	0.00228892	1.00187	C16orf54	protein_coding
ENSG00000111737.11	0.00214378	0.000550121	3.89693	9.74208e-05	0.00228892	1.00149	RAB35	protein_coding
ENSG00000076554.15	-0.00333595	0.000856377	-3.89543	9.80262e-05	0.00230023	0.99769	TPD52	protein_coding
ENSG00000280003.1	0.00319072	0.000819214	3.89485	9.82603e-05	0.00230384	1.00221	AC097637.2	TEC
ENSG00000071553.16	0.00214588	0.000550993	3.89457	9.83732e-05	0.00230462	1.00149	ATP6AP1	protein_coding
ENSG00000143799.12	-0.00254628	0.000653961	-3.89362	9.87585e-05	0.00231177	0.998237	PARP1	protein_coding
ENSG00000158470.5	0.00353855	0.000909045	3.8926	9.91756e-05	0.00231815	1.00246	B4GALT5	protein_coding
ENSG00000106829.18	0.00184108	0.000472974	3.89256	9.91921e-05	0.00231815	1.00128	TLE4	protein_coding
ENSG00000266980.1	0.00672195	0.00172731	3.89156	9.96015e-05	0.00232584	1.00467	AC087289.1	antisense
ENSG00000132704.15	-0.00630941	0.00162146	-3.89118	9.97593e-05	0.00232764	0.995636	FCRL2	protein_coding
ENSG00000263883.1	0.00219784	0.000564894	3.89071	9.99499e-05	0.0023302	1.00152	EEF1DP7	transcribed_processed_pseudogene
ENSG00000248559.1	0.00297816	0.00076556	3.89017	0.000100176	0.00233357	1.00207	AC109454.2	antisense
ENSG00000133812.15	0.0023468	0.000603387	3.88938	0.000100499	0.00233922	1.00163	SBF2	protein_coding
ENSG00000214456.8	0.00380004	0.000977207	3.88868	0.000100791	0.00234412	1.00264	PLIN5	protein_coding
ENSG00000200354.1	0.00602994	0.00155101	3.88776	0.000101173	0.00235035	1.00419	SNORA71D	snoRNA
ENSG00000241772.2	0.00330886	0.000851121	3.88764	0.000101222	0.00235035	1.0023	AC092620.2	3prime_overlapping_ncRNA
ENSG00000161405.16	-0.00258571	0.000665254	-3.88681	0.000101571	0.00235468	0.998209	IKZF3	protein_coding
ENSG00000160654.10	-0.00318481	0.000819377	-3.88687	0.000101545	0.00235468	0.997795	CD3G	protein_coding
ENSG00000101290.13	0.00209131	0.000538111	3.88639	0.000101747	0.00235685	1.00145	CDS2	protein_coding
ENSG00000169905.12	0.00114918	0.000295753	3.8856	0.000102077	0.00236259	1.0008	TOR1AIP2	protein_coding
ENSG00000204386.10	0.00235439	0.000606046	3.88484	0.000102398	0.00236812	1.00163	NEU1	protein_coding
ENSG00000258227.6	0.00484565	0.0012476	3.88397	0.000102763	0.00237467	1.00336	CLEC5A	protein_coding
ENSG00000241413.3	0.00285493	0.000735159	3.88341	0.000103	0.00237824	1.00198	RN7SL441P	misc_RNA
ENSG00000254709.7	-0.00725405	0.00186859	-3.88209	0.000103562	0.00238847	0.994984	IGLL5	protein_coding
ENSG00000243667.6	-0.00177777	0.00045797	-3.88184	0.000103667	0.00238847	0.998769	WDR92	protein_coding
ENSG00000043462.11	0.0018022	0.000464271	3.88179	0.000103692	0.00238847	1.00125	LCP2	protein_coding
ENSG00000279430.1	0.00418206	0.00107753	3.88116	0.000103961	0.00239276	1.0029	AL590560.2	TEC
ENSG00000125834.12	0.00209797	0.000540699	3.88011	0.00010441	0.00240119	1.00146	STK35	protein_coding
ENSG00000181852.17	0.0014964	0.000385698	3.87972	0.000104575	0.00240186	1.00104	RNF41	protein_coding
ENSG00000164463.12	0.00252316	0.000650357	3.87965	0.000104606	0.00240186	1.00175	CREBRF	protein_coding
ENSG00000269858.5	0.00204817	0.000527991	3.87917	0.000104813	0.00240471	1.00142	EGLN2	protein_coding
ENSG00000114770.16	0.00266596	0.000687625	3.87705	0.000105729	0.00242379	1.00185	ABCC5	protein_coding
ENSG00000270273.1	-0.00509254	0.00131367	-3.87656	0.000105942	0.00242674	0.996476	AC121334.2	processed_pseudogene
ENSG00000230325.1	-0.00516349	0.00133249	-3.87508	0.000106591	0.00243967	0.996427	AL359921.1	antisense
ENSG00000217555.12	0.00335136	0.000865015	3.87434	0.000106914	0.00244512	1.00233	CKLF	protein_coding
ENSG00000101224.17	-0.00348937	0.000900772	-3.87375	0.000107172	0.00244908	0.997584	CDC25B	protein_coding
ENSG00000129158.10	-0.00179424	0.000463229	-3.87333	0.000107359	0.00245141	0.998757	SERGEF	protein_coding
ENSG00000115561.15	0.00190735	0.000492482	3.87294	0.000107532	0.00245342	1.00132	CHMP3	protein_coding
ENSG00000243953.1	0.00631863	0.00163239	3.87078	0.000108489	0.00247329	1.00439	AC073359.1	lincRNA
ENSG00000129204.16	0.00313009	0.000808831	3.86989	0.000108885	0.00248037	1.00217	USP6	protein_coding
ENSG00000126001.15	-0.00169622	0.0004384	-3.86913	0.000109226	0.0024842	0.998825	CEP250	protein_coding
ENSG00000260941.1	0.00475604	0.00122921	3.86918	0.000109201	0.0024842	1.0033	LINC00622	sense_overlapping
ENSG00000183018.8	0.00503884	0.0013024	3.86888	0.000109336	0.00248475	1.0035	SPNS2	protein_coding
ENSG00000156313.13	0.00250684	0.000648174	3.86755	0.000109935	0.0024964	1.00174	RPGR	protein_coding
ENSG00000141298.18	0.00304335	0.000787045	3.8668	0.000110273	0.00250211	1.00211	SSH2	protein_coding
ENSG00000144130.11	0.00739897	0.00191398	3.86574	0.000110751	0.00251097	1.00514	NT5DC4	protein_coding
ENSG00000175216.14	-0.00196504	0.000508553	-3.86399	0.000111551	0.00251655	0.998639	CKAP5	protein_coding
ENSG00000188487.11	0.00677233	0.00175258	3.8642	0.000111455	0.00251655	1.00471	INSC	protein_coding
ENSG00000273247.5	0.00177585	0.000459519	3.86459	0.000111276	0.00251655	1.00123	AC097376.2	antisense
ENSG00000176788.8	0.00438863	0.00113576	3.86405	0.00011152	0.00251655	1.00305	BASP1	protein_coding
ENSG00000136169.16	-0.00208338	0.000539197	-3.86386	0.000111608	0.00251655	0.998557	SETDB2	protein_coding
ENSG00000096060.14	0.00388234	0.0010046	3.86455	0.000111294	0.00251655	1.00269	FKBP5	protein_coding
ENSG00000272918.1	0.00268003	0.000693521	3.86439	0.000111368	0.00251655	1.00186	AC005070.3	antisense
ENSG00000240203.3	0.00603771	0.00156288	3.8632	0.000111912	0.00252143	1.00419	RN7SL567P	misc_RNA
ENSG00000254789.2	0.00824286	0.0021344	3.8619	0.000112508	0.00253288	1.00573	AC073172.1	lincRNA
ENSG00000214530.9	0.00279112	0.00072309	3.85999	0.000113392	0.0025508	1.00194	STARD10	protein_coding
ENSG00000148660.20	0.00238495	0.000618191	3.85795	0.000114344	0.00257021	1.00165	CAMK2G	protein_coding
ENSG00000158711.13	-0.00199291	0.000516673	-3.85719	0.000114698	0.00257616	0.99862	ELK4	protein_coding
ENSG00000115604.10	0.00350529	0.000908853	3.85682	0.00011487	0.002578	1.00243	IL18R1	protein_coding
ENSG00000171223.5	0.00350788	0.000909654	3.85627	0.000115128	0.00258179	1.00243	JUNB	protein_coding
ENSG00000277443.2	0.00383082	0.000993452	3.85607	0.000115225	0.00258196	1.00266	MARCKS	protein_coding
ENSG00000260148.1	0.00480739	0.00124711	3.85483	0.000115809	0.00259102	1.00334	AC009090.2	antisense
ENSG00000198556.13	-0.00168287	0.000436548	-3.85493	0.000115761	0.00259102	0.998834	ZNF789	protein_coding
ENSG00000116157.5	-0.00323426	0.00083928	-3.85362	0.000116385	0.00260188	0.997761	GPX7	protein_coding
ENSG00000280206.1	0.00224012	0.000581488	3.8524	0.000116968	0.00261288	1.00155	AC026401.3	lincRNA
ENSG00000133943.20	0.00258445	0.000670913	3.85214	0.00011709	0.0026136	1.00179	DGLUCY	protein_coding
ENSG00000083093.9	-0.00207795	0.000539486	-3.85173	0.000117289	0.00261398	0.998561	PALB2	protein_coding
ENSG00000107951.14	-0.00111725	0.000290056	-3.85182	0.000117241	0.00261398	0.999226	MTPAP	protein_coding
ENSG00000175054.14	-0.00221032	0.000573939	-3.85114	0.000117571	0.00261825	0.998469	ATR	protein_coding
ENSG00000182308.6	0.00309451	0.000803792	3.84989	0.000118171	0.00262755	1.00215	DCAF4L1	protein_coding
ENSG00000115594.11	0.00513312	0.00133331	3.84991	0.00011816	0.00262755	1.00356	IL1R1	protein_coding
ENSG00000100605.16	0.00318524	0.000827499	3.84924	0.000118487	0.00263052	1.00221	ITPK1	protein_coding
ENSG00000231327.1	0.00287412	0.000746651	3.84934	0.000118434	0.00263052	1.00199	LINC01816	lincRNA
ENSG00000230839.1	0.00413384	0.00107452	3.84714	0.000119503	0.00265104	1.00287	AL121760.1	lincRNA
ENSG00000118922.17	-0.00283824	0.000737984	-3.84593	0.000120094	0.00265598	0.998035	KLF12	protein_coding
ENSG00000073921.17	0.00250275	0.000650712	3.84616	0.000119981	0.00265598	1.00174	PICALM	protein_coding
ENSG00000110756.17	-0.00143808	0.000373913	-3.84603	0.000120045	0.00265598	0.999004	HPS5	protein_coding
ENSG00000065526.10	0.00155849	0.00040523	3.84595	0.000120087	0.00265598	1.00108	SPEN	protein_coding
ENSG00000224638.1	0.00538858	0.00140125	3.84555	0.000120284	0.00265814	1.00374	AC106900.1	lincRNA
ENSG00000118217.5	0.00215535	0.000560641	3.84443	0.000120831	0.00266614	1.0015	ATF6	protein_coding
ENSG00000168827.14	-0.00177816	0.000462511	-3.84459	0.000120754	0.00266614	0.998768	GFM1	protein_coding
ENSG00000165609.12	0.00188788	0.000491106	3.84414	0.000120975	0.00266728	1.00131	NUDT5	protein_coding
ENSG00000163705.12	0.00232345	0.0006047	3.84231	0.00012188	0.00268518	1.00161	FANCD2OS	protein_coding
ENSG00000172936.13	0.00314118	0.000817641	3.84176	0.000122156	0.00268921	1.00218	MYD88	protein_coding
ENSG00000078319.9	-0.00214405	0.000558422	-3.83947	0.000123298	0.00271029	0.998515	PMS2P1	unprocessed_pseudogene
ENSG00000048392.11	0.00346836	0.000903344	3.83947	0.000123302	0.00271029	1.00241	RRM2B	protein_coding
ENSG00000145996.11	-0.00188779	0.000491713	-3.83922	0.000123428	0.002711	0.998692	CDKAL1	protein_coding
ENSG00000285106.1	0.00265903	0.000692838	3.83788	0.000124102	0.00272372	1.00184	AC016831.6	lincRNA
ENSG00000236474.1	-0.00273792	0.000713665	-3.83642	0.000124843	0.0027379	0.998104	GCNT1P1	processed_pseudogene
ENSG00000168234.12	-0.00220726	0.000575417	-3.83593	0.000125089	0.00273914	0.998471	TTC39C	protein_coding
ENSG00000171843.15	-0.00297245	0.000774859	-3.83611	0.000124998	0.00273914	0.997942	MLLT3	protein_coding
ENSG00000196923.13	0.00439603	0.00114625	3.83513	0.000125498	0.00274601	1.00305	PDLIM7	protein_coding
ENSG00000064763.10	0.0030592	0.000797848	3.83432	0.000125911	0.00275296	1.00212	FAR2	protein_coding
ENSG00000232528.3	0.00402923	0.00105093	3.83398	0.000126087	0.00275471	1.0028	AL109809.1	transcribed_unitary_pseudogene
ENSG00000196549.10	0.00447418	0.00116706	3.8337	0.000126228	0.0027557	1.00311	MME	protein_coding
ENSG00000259626.2	0.0049072	0.00128012	3.83339	0.000126392	0.0027572	1.00341	MTND3P12	processed_pseudogene
ENSG00000004059.10	0.00226577	0.0005911	3.83314	0.000126518	0.00275787	1.00157	ARF5	protein_coding
ENSG00000100612.13	0.00269988	0.000704601	3.83178	0.000127218	0.00276902	1.00187	DHRS7	protein_coding
ENSG00000153107.12	-0.00159968	0.000417479	-3.83178	0.000127222	0.00276902	0.998892	ANAPC1	protein_coding
ENSG00000114353.16	0.00273509	0.000713983	3.83075	0.000127752	0.00277637	1.0019	GNAI2	protein_coding
ENSG00000183323.12	0.0023086	0.000602631	3.83087	0.000127692	0.00277637	1.0016	CCDC125	protein_coding
ENSG00000158793.13	0.00134931	0.000352254	3.8305	0.000127885	0.00277716	1.00094	NIT1	protein_coding
ENSG00000146826.16	0.0030583	0.000798776	3.82873	0.000128807	0.00279298	1.00212	C7orf43	protein_coding
ENSG00000005471.17	-0.00552277	0.00144245	-3.82875	0.000128794	0.00279298	0.996179	ABCB4	protein_coding
ENSG00000102580.14	0.00283977	0.000741798	3.82823	0.000129068	0.0027963	1.00197	DNAJC3	protein_coding
ENSG00000114021.11	-0.00155689	0.000406705	-3.82807	0.000129154	0.0027963	0.998921	NIT2	protein_coding
ENSG00000185262.8	0.00316663	0.000827287	3.82772	0.000129335	0.00279664	1.0022	UBALD2	protein_coding
ENSG00000118508.4	0.00316983	0.000828137	3.82767	0.000129364	0.00279664	1.0022	RAB32	protein_coding
ENSG00000269194.1	0.00390587	0.00102055	3.82723	0.000129596	0.00279956	1.00271	AC006942.1	antisense
ENSG00000155957.17	0.00218209	0.000570257	3.8265	0.000129979	0.00280363	1.00151	TMBIM4	protein_coding
ENSG00000113360.16	-0.00195591	0.000511124	-3.82668	0.000129885	0.00280363	0.998645	DROSHA	protein_coding
ENSG00000137265.14	-0.00292506	0.000764924	-3.82399	0.000131307	0.00283016	0.997975	IRF4	protein_coding
ENSG00000072110.13	0.00355213	0.000929043	3.82343	0.000131607	0.00283028	1.00247	ACTN1	protein_coding
ENSG00000011376.10	-0.00160235	0.000419054	-3.82374	0.000131444	0.00283028	0.99889	LARS2	protein_coding
ENSG00000109133.12	0.00212846	0.000556669	3.82356	0.000131541	0.00283028	1.00148	TMEM33	protein_coding
ENSG00000080815.18	0.00201961	0.00052826	3.82313	0.000131767	0.00283162	1.0014	PSEN1	protein_coding
ENSG00000221826.9	0.00512454	0.00134084	3.8219	0.000132428	0.0028421	1.00356	PSG3	protein_coding
ENSG00000141526.16	0.00338099	0.000884647	3.82185	0.000132452	0.0028421	1.00235	SLC16A3	protein_coding
ENSG00000090905.18	-0.0019096	0.000499793	-3.82078	0.000133028	0.00285235	0.998677	TNRC6A	protein_coding
ENSG00000152465.17	-0.00256291	0.000670896	-3.82014	0.000133376	0.00285768	0.998225	NMT2	protein_coding
ENSG00000125459.15	-0.00215813	0.000565068	-3.81924	0.000133864	0.00286599	0.998505	MSTO1	protein_coding
ENSG00000141293.15	-0.00278616	0.000729602	-3.81874	0.000134133	0.00286963	0.998071	SKAP1	protein_coding
ENSG00000254470.2	0.00374128	0.000979802	3.81841	0.000134317	0.00287062	1.0026	AP5B1	protein_coding
ENSG00000148719.14	0.00192074	0.000503036	3.81829	0.000134378	0.00287062	1.00133	DNAJB12	protein_coding
ENSG00000119004.15	-0.00162048	0.000424548	-3.81696	0.000135108	0.00288407	0.998877	CYP20A1	protein_coding
ENSG00000095319.14	-0.00208279	0.000545833	-3.8158	0.00013574	0.00289543	0.998557	NUP188	protein_coding
ENSG00000250950.1	0.00205306	0.000538141	3.81509	0.000136131	0.00290162	1.00142	AC093752.2	lincRNA
ENSG00000275131.3	-0.00255368	0.0006696	-3.81373	0.000136884	0.00291341	0.998231	AC241952.1	transcribed_unprocessed_pseudogene
ENSG00000173214.5	-0.00145154	0.00038061	-3.81373	0.000136887	0.00291341	0.998994	MFSD4B	protein_coding
ENSG00000267338.1	0.00292257	0.00076637	3.81353	0.000136997	0.00291362	1.00203	AP000365.1	lincRNA
ENSG00000153944.10	-0.00155974	0.000409063	-3.81294	0.000137321	0.00291835	0.998919	MSI2	protein_coding
ENSG00000273035.1	-0.00315605	0.000828053	-3.81142	0.000138173	0.00293429	0.997815	AC007684.1	sense_intronic
ENSG00000144218.18	-0.00459043	0.00120454	-3.81094	0.000138441	0.00293782	0.996823	AFF3	protein_coding
ENSG00000113048.16	-0.00176538	0.000463334	-3.81016	0.000138877	0.0029449	0.998777	MRPS27	protein_coding
ENSG00000264456.1	0.0031054	0.000815172	3.8095	0.000139247	0.00295059	1.00215	AC138207.4	sense_intronic
ENSG00000272542.1	-0.00263716	0.000692391	-3.80877	0.000139659	0.00295714	0.998174	AL137246.1	lincRNA
ENSG00000082996.19	0.00302325	0.000794077	3.80724	0.000140524	0.00297327	1.0021	RNF13	protein_coding
ENSG00000129911.8	0.002463	0.000646976	3.80694	0.000140695	0.0029747	1.00171	KLF16	protein_coding
ENSG00000263993.2	0.00387033	0.00101719	3.80494	0.000141836	0.00299587	1.00269	RN7SL786P	misc_RNA
ENSG00000112182.14	-0.00361047	0.000948959	-3.80466	0.000141997	0.00299587	0.997501	BACH2	protein_coding
ENSG00000184602.5	0.00308348	0.00081045	3.80465	0.000142007	0.00299587	1.00214	SNN	protein_coding
ENSG00000125810.9	0.00398889	0.00104863	3.80392	0.000142426	0.00300251	1.00277	CD93	protein_coding
ENSG00000086712.12	-0.00202597	0.000532735	-3.80297	0.000142972	0.00301098	0.998597	TXLNG	protein_coding
ENSG00000137312.14	0.00311429	0.000818934	3.80286	0.000143037	0.00301098	1.00216	FLOT1	protein_coding
ENSG00000229863.1	0.00306482	0.000805991	3.80255	0.000143213	0.00301248	1.00213	AC097358.1	processed_pseudogene
ENSG00000225783.7	-0.00388352	0.00102152	-3.80171	0.000143703	0.00301839	0.997312	MIAT	lincRNA
ENSG00000242247.10	0.0018733	0.00049273	3.80188	0.000143605	0.00301839	1.0013	ARFGAP3	protein_coding
ENSG00000257094.1	0.00259461	0.000682598	3.80108	0.000144068	0.00302166	1.0018	AC016957.1	processed_pseudogene
ENSG00000087253.12	0.00323187	0.000850218	3.80122	0.000143983	0.00302166	1.00224	LPCAT2	protein_coding
ENSG00000260528.4	0.00466746	0.00122813	3.80047	0.000144424	0.00302631	1.00324	FAM157C	lincRNA
ENSG00000131759.17	0.00339	0.000892027	3.80034	0.0001445	0.00302631	1.00235	RARA	protein_coding
ENSG00000232672.1	0.00456561	0.0012017	3.7993	0.000145103	0.00303674	1.00317	ACTG1P21	processed_pseudogene
ENSG00000130768.14	0.00516517	0.00135972	3.79869	0.000145461	0.00304202	1.00359	SMPDL3B	protein_coding
ENSG00000099875.14	0.00297442	0.000783088	3.79832	0.000145682	0.00304443	1.00206	MKNK2	protein_coding
ENSG00000222365.1	0.0033095	0.000871392	3.79795	0.000145897	0.00304672	1.0023	SNORD12B	snoRNA
ENSG00000129657.15	0.00355853	0.000937147	3.79719	0.000146346	0.0030539	1.00247	SEC14L1	protein_coding
ENSG00000137270.10	0.00391824	0.00103195	3.79692	0.000146504	0.00305497	1.00272	GCM1	protein_coding
ENSG00000179889.18	-0.00166415	0.000438687	-3.79347	0.000148555	0.00308215	0.998847	PDXDC1	protein_coding
ENSG00000174718.11	0.00325758	0.000858509	3.79446	0.000147966	0.00308215	1.00226	KIAA1551	protein_coding
ENSG00000261338.2	0.00159675	0.00042092	3.79349	0.000148543	0.00308215	1.00111	AC021016.2	sense_overlapping
ENSG00000275373.1	0.00432848	0.00114077	3.79436	0.000148024	0.00308215	1.003	MIR6124	miRNA
ENSG00000257764.2	0.00472422	0.0012452	3.79394	0.000148277	0.00308215	1.00328	AC020656.1	antisense
ENSG00000169230.9	0.00267499	0.000705126	3.79363	0.000148462	0.00308215	1.00186	PRELID1	protein_coding
ENSG00000232303.2	0.00247556	0.000652521	3.79385	0.000148331	0.00308215	1.00172	DFFBP1	processed_pseudogene
ENSG00000229331.1	0.00453829	0.001197	3.7914	0.000149799	0.00309803	1.00315	GK-IT1	sense_intronic
ENSG00000101546.12	-0.00167007	0.0004405	-3.7913	0.000149858	0.00309803	0.998843	RBFA	protein_coding
ENSG00000108840.15	0.0026056	0.000687172	3.79177	0.000149579	0.00309803	1.00181	HDAC5	protein_coding
ENSG00000100461.17	0.00197863	0.000521882	3.79133	0.00014984	0.00309803	1.00137	RBM23	protein_coding
ENSG00000211865.1	-0.00340111	0.000897071	-3.79135	0.00014983	0.00309803	0.997645	TRAJ24	TR_J_gene
ENSG00000171206.14	0.00251472	0.000663431	3.79048	0.000150359	0.00310616	1.00174	TRIM8	protein_coding
ENSG00000202523.1	0.00386231	0.00101945	3.78863	0.00015148	0.00312709	1.00268	RF00019	misc_RNA
ENSG00000269246.1	0.00502939	0.00132763	3.78825	0.000151714	0.00312967	1.00349	AC011445.2	lincRNA
ENSG00000248863.2	0.00252417	0.000666382	3.78788	0.000151938	0.00313112	1.00175	AC097376.1	transcribed_processed_pseudogene
ENSG00000115165.9	0.00212753	0.000561683	3.78778	0.000152001	0.00313112	1.00148	CYTIP	protein_coding
ENSG00000165288.10	0.00198697	0.000524852	3.78576	0.000153237	0.00315433	1.00138	BRWD3	protein_coding
ENSG00000164663.14	0.00167983	0.00044377	3.78536	0.000153488	0.00315724	1.00117	USP49	protein_coding
ENSG00000165819.11	-0.00160518	0.000424133	-3.78461	0.000153951	0.0031645	0.998888	METTL3	protein_coding
ENSG00000170345.9	0.00481631	0.00127302	3.78336	0.000154722	0.00317809	1.00334	FOS	protein_coding
ENSG00000119820.10	0.0016675	0.000440809	3.78282	0.000155061	0.00318278	1.00116	YIPF4	protein_coding
ENSG00000253598.1	-0.00293973	0.000777319	-3.78188	0.000155646	0.00319252	0.997964	SLC10A5	protein_coding
ENSG00000051825.14	-0.00206798	0.000546863	-3.78154	0.00015586	0.00319463	0.998568	MPHOSPH9	protein_coding
ENSG00000022277.12	0.00260332	0.000688583	3.78069	0.000156394	0.00320331	1.00181	RTF2	protein_coding
ENSG00000069493.14	-0.00270664	0.000716381	-3.77821	0.000157958	0.00323303	0.998126	CLEC2D	protein_coding
ENSG00000130363.11	0.00213944	0.000566338	3.77768	0.000158297	0.00323769	1.00148	RSPH3	protein_coding
ENSG00000214212.8	0.00294594	0.000779876	3.77744	0.000158448	0.00323848	1.00204	C19orf38	protein_coding
ENSG00000136026.13	0.00332431	0.000880093	3.77722	0.000158586	0.00323899	1.00231	CKAP4	protein_coding
ENSG00000147138.2	-0.00289268	0.000766184	-3.77544	0.000159724	0.00325531	0.997997	GPR174	protein_coding
ENSG00000122707.11	-0.00163193	0.000432223	-3.77566	0.000159583	0.00325531	0.998869	RECK	protein_coding
ENSG00000204960.6	0.00475731	0.00126003	3.77557	0.000159644	0.00325531	1.0033	BLACE	lincRNA
ENSG00000182670.13	-0.00222082	0.000588348	-3.77466	0.000160224	0.00325848	0.998462	TTC3	protein_coding
ENSG00000135372.8	-0.00177589	0.000470464	-3.77477	0.000160158	0.00325848	0.99877	NAT10	protein_coding
ENSG00000260923.6	0.0036567	0.000968717	3.77478	0.000160147	0.00325848	1.00254	LINC02193	lincRNA
ENSG00000147883.10	0.00382859	0.00101433	3.7745	0.000160331	0.00325848	1.00266	CDKN2B	protein_coding
ENSG00000018699.12	-0.00230277	0.000610168	-3.774	0.000160649	0.00326035	0.998405	TTC27	protein_coding
ENSG00000226380.9	0.00275102	0.00072892	3.7741	0.000160588	0.00326035	1.00191	LINC-PINT	lincRNA
ENSG00000110880.10	0.00239409	0.000634452	3.77347	0.000160991	0.0032627	1.00166	CORO1C	protein_coding
ENSG00000105926.15	-0.00317258	0.000840731	-3.77359	0.000160915	0.0032627	0.997803	MPP6	protein_coding
ENSG00000265996.1	0.0029966	0.000794215	3.77304	0.000161272	0.00326382	1.00208	MIR3671	miRNA
ENSG00000124126.13	0.00312018	0.000826955	3.77309	0.000161238	0.00326382	1.00217	PREX1	protein_coding
ENSG00000263961.7	0.00683523	0.00181229	3.7716	0.000162204	0.00328036	1.00475	RHEX	protein_coding
ENSG00000187808.4	0.00309412	0.000820721	3.77	0.000163247	0.00329914	1.00215	SOWAHD	protein_coding
ENSG00000138614.14	-0.00194763	0.000516811	-3.76856	0.000164191	0.00331357	0.998651	INTS14	protein_coding
ENSG00000024048.10	0.00224009	0.000594406	3.76862	0.00016415	0.00331357	1.00155	UBR2	protein_coding
ENSG00000241886.1	0.00385144	0.00102209	3.76821	0.000164425	0.00331599	1.00267	AC112496.1	sense_intronic
ENSG00000144468.16	-0.00247169	0.000656042	-3.76758	0.000164837	0.00332141	0.998288	RHBDD1	protein_coding
ENSG00000070950.9	-0.00170537	0.000452659	-3.76745	0.000164924	0.00332141	0.998819	RAD18	protein_coding
ENSG00000132749.10	0.00247703	0.000657811	3.76556	0.000166174	0.00334424	1.00172	TESMIN	protein_coding
ENSG00000254634.4	-0.00482958	0.00128275	-3.76501	0.000166545	0.00334936	0.996658	SMG1P6	unprocessed_pseudogene
ENSG00000196411.9	0.00456688	0.00121318	3.76438	0.000166962	0.0033554	1.00317	EPHB4	protein_coding
ENSG00000035862.12	0.00388003	0.00103107	3.76312	0.000167805	0.00336924	1.00269	TIMP2	protein_coding
ENSG00000232533.1	0.00290878	0.000772995	3.76301	0.000167883	0.00336924	1.00202	AC093673.1	antisense
ENSG00000257114.2	0.0028611	0.000760743	3.76093	0.000169285	0.003395	1.00199	LINC02450	lincRNA
ENSG00000188997.7	0.00245249	0.000652209	3.76028	0.000169721	0.00340139	1.0017	KCTD21	protein_coding
ENSG00000184205.14	-0.00255592	0.000679788	-3.75988	0.000169998	0.00340457	0.99823	TSPYL2	protein_coding
ENSG00000108479.11	0.00293347	0.000780583	3.75805	0.000171245	0.00342716	1.00204	GALK1	protein_coding
ENSG00000129749.3	0.0027232	0.000724676	3.75781	0.000171406	0.003428	1.00189	CHRNA10	protein_coding
ENSG00000248162.1	0.00311414	0.000828853	3.75717	0.000171845	0.0034344	1.00216	AC074198.1	processed_pseudogene
ENSG00000251192.7	0.00160051	0.000426085	3.75633	0.000172425	0.0034436	1.00111	ZNF674	protein_coding
ENSG00000082516.8	-0.00186638	0.000496965	-3.75556	0.000172952	0.0034446	0.998707	GEMIN5	protein_coding
ENSG00000138434.16	0.00223519	0.000595165	3.75559	0.000172936	0.0034446	1.00155	ITPRID2	protein_coding
ENSG00000157350.12	0.00215504	0.000573813	3.75565	0.000172891	0.0034446	1.00149	ST3GAL2	protein_coding
ENSG00000135828.11	0.00226747	0.000603694	3.75599	0.000172659	0.0034446	1.00157	RNASEL	protein_coding
ENSG00000169991.10	-0.00257638	0.000686207	-3.75453	0.000173668	0.00345646	0.998216	IFFO2	protein_coding
ENSG00000166167.17	-0.00165191	0.000440063	-3.75381	0.000174166	0.00346398	0.998856	BTRC	protein_coding
ENSG00000130475.14	0.00246882	0.00065779	3.7532	0.000174594	0.00346772	1.00171	FCHO1	protein_coding
ENSG00000136891.13	-0.00171552	0.000457064	-3.75335	0.00017449	0.00346772	0.998812	TEX10	protein_coding
ENSG00000222057.1	0.00321144	0.000855804	3.75254	0.000175055	0.00347448	1.00223	RNU4-62P	snRNA
ENSG00000101307.15	0.0035156	0.000937083	3.75164	0.00017568	0.00348449	1.00244	SIRPB1	protein_coding
ENSG00000135749.18	-0.00221172	0.000589737	-3.75035	0.000176585	0.00350003	0.998468	PCNX2	protein_coding
ENSG00000267430.1	0.00204457	0.000545197	3.75014	0.000176736	0.00350061	1.00142	AC036176.2	processed_pseudogene
ENSG00000131467.10	0.00213434	0.000569264	3.7493	0.000177329	0.00350995	1.00148	PSME3	protein_coding
ENSG00000127507.17	0.00347901	0.00092801	3.74889	0.00017762	0.00351089	1.00241	ADGRE2	protein_coding
ENSG00000235290.1	0.00571991	0.00152573	3.74896	0.000177571	0.00351089	1.00397	HLA-W	unprocessed_pseudogene
ENSG00000123815.11	0.00169878	0.000453229	3.74816	0.000178134	0.00351646	1.00118	COQ8B	protein_coding
ENSG00000174652.18	-0.00213049	0.000568438	-3.74798	0.000178268	0.00351646	0.998524	ZNF266	protein_coding
ENSG00000211662.2	-0.00949937	0.00253449	-3.74803	0.000178226	0.00351646	0.993437	IGLV3-21	IG_V_gene
ENSG00000108244.16	0.00502379	0.00134131	3.74545	0.000180074	0.00354966	1.00349	KRT23	protein_coding
ENSG00000137161.16	0.00242165	0.000646609	3.74515	0.000180284	0.00355138	1.00168	CNPY3	protein_coding
ENSG00000153560.11	-0.00159777	0.000426919	-3.74256	0.000182153	0.00358574	0.998893	UBP1	protein_coding
ENSG00000101391.20	-0.00132799	0.000354878	-3.74211	0.000182478	0.00358969	0.99908	CDK5RAP1	protein_coding
ENSG00000204427.11	0.00220507	0.000589306	3.74181	0.000182702	0.00359165	1.00153	ABHD16A	protein_coding
ENSG00000011295.15	-0.00181318	0.000484763	-3.74034	0.000183772	0.00361021	0.998744	TTC19	protein_coding
ENSG00000229899.1	0.00391137	0.00104579	3.74012	0.000183936	0.00361097	1.00271	AC084290.1	processed_pseudogene
ENSG00000201077.1	0.00279552	0.000747488	3.73989	0.000184102	0.00361178	1.00194	RNU6-188P	snRNA
ENSG00000163681.14	0.00148969	0.000398345	3.73969	0.000184248	0.00361219	1.00103	SLMAP	protein_coding
ENSG00000232912.5	0.00339686	0.000908423	3.73929	0.000184539	0.00361543	1.00236	AL096855.1	antisense
ENSG00000235852.1	-0.005496	0.00147066	-3.73709	0.000186164	0.00364281	0.996198	AC005540.1	antisense
ENSG00000165392.9	-0.00227302	0.00060824	-3.73705	0.000186189	0.00364281	0.998426	WRN	protein_coding
ENSG00000271304.2	0.0066546	0.00178093	3.73659	0.000186535	0.0036471	1.00462	DPRXP2	transcribed_processed_pseudogene
ENSG00000151503.12	-0.00166053	0.000444417	-3.73642	0.000186662	0.00364712	0.99885	NCAPD3	protein_coding
ENSG00000163964.14	0.00267273	0.000715612	3.73489	0.000187797	0.00366682	1.00185	PIGX	protein_coding
ENSG00000256812.1	0.00349507	0.000935975	3.73415	0.000188352	0.00367516	1.00243	CAPNS2	protein_coding
ENSG00000140350.15	0.00205216	0.000549671	3.73344	0.000188883	0.00368302	1.00142	ANP32A	protein_coding
ENSG00000162704.15	0.00276862	0.000741703	3.73279	0.000189372	0.00369007	1.00192	ARPC5	protein_coding
ENSG00000143458.11	-0.00124149	0.000332623	-3.73241	0.000189654	0.00369246	0.99914	GABPB2	protein_coding
ENSG00000116120.9	-0.00192381	0.00051545	-3.73228	0.000189751	0.00369246	0.998667	FARSB	protein_coding
ENSG00000149474.13	-0.00199849	0.000535518	-3.73187	0.000190062	0.00369603	0.998616	KAT14	protein_coding
ENSG00000280169.1	0.00457824	0.00122729	3.73037	0.000191197	0.00371558	1.00318	AL136526.1	antisense
ENSG00000118263.14	0.00257579	0.000690566	3.72997	0.000191505	0.00371907	1.00179	KLF7	protein_coding
ENSG00000261512.2	0.00366135	0.000981878	3.72893	0.000192297	0.00372942	1.00254	AC092368.3	lincRNA
ENSG00000273682.1	-0.00219913	0.000589723	-3.7291	0.000192169	0.00372942	0.998477	AC109583.2	processed_pseudogene
ENSG00000186074.18	0.00265435	0.000711888	3.72861	0.000192539	0.0037316	1.00184	CD300LF	protein_coding
ENSG00000255292.8	-0.00397477	0.00106635	-3.72744	0.000193432	0.00374388	0.997249	AP002884.3	protein_coding
ENSG00000143418.19	0.00182076	0.000488459	3.72756	0.000193346	0.00374388	1.00126	CERS2	protein_coding
ENSG00000197442.9	0.00197996	0.000531317	3.72651	0.000194146	0.00375519	1.00137	MAP3K5	protein_coding
ENSG00000213719.8	0.00301754	0.000809867	3.72597	0.000194569	0.00376084	1.00209	CLIC1	protein_coding
ENSG00000159917.16	-0.00186961	0.000501848	-3.72545	0.00019497	0.00376607	0.998705	ZNF235	protein_coding
ENSG00000265118.5	0.00432332	0.00116069	3.72478	0.000195488	0.00376849	1.003	AC134669.1	protein_coding
ENSG00000283839.1	0.0033423	0.000897261	3.72501	0.00019531	0.00376849	1.00232	AC096667.1	antisense
ENSG00000148450.12	0.00284898	0.000764858	3.72485	0.00019543	0.00376849	1.00198	MSRB2	protein_coding
ENSG00000100462.15	0.00241117	0.00064737	3.72457	0.000195652	0.00376914	1.00167	PRMT5	protein_coding
ENSG00000275948.1	0.00499733	0.00134179	3.72438	0.000195795	0.00376939	1.00347	RF01684	sRNA
ENSG00000101596.15	0.00287395	0.000771788	3.72376	0.000196277	0.00377122	1.00199	SMCHD1	protein_coding
ENSG00000131379.9	0.00564343	0.00151563	3.72349	0.000196484	0.00377122	1.00392	C3orf20	protein_coding
ENSG00000178562.17	-0.00323356	0.000868329	-3.72388	0.000196181	0.00377122	0.997761	CD28	protein_coding
ENSG00000213523.10	0.00195047	0.00052383	3.72348	0.000196494	0.00377122	1.00135	SRA1	protein_coding
ENSG00000223586.5	0.00467343	0.00125515	3.72342	0.000196545	0.00377122	1.00324	LINC01312	lincRNA
ENSG00000156502.13	-0.00147077	0.000395045	-3.72305	0.000196833	0.00377424	0.998981	SUPV3L1	protein_coding
ENSG00000136867.10	0.00346472	0.000930664	3.72285	0.000196988	0.00377471	1.0024	SLC31A2	protein_coding
ENSG00000102554.13	0.00372179	0.000999868	3.72228	0.00019743	0.00378067	1.00258	KLF5	protein_coding
ENSG00000134684.10	-0.00167771	0.000450921	-3.72062	0.000198732	0.00379181	0.998838	YARS	protein_coding
ENSG00000100647.7	0.00304715	0.000818862	3.7212	0.000198275	0.00379181	1.00211	SUSD6	protein_coding
ENSG00000207136.1	0.00380281	0.00102209	3.72064	0.000198717	0.00379181	1.00264	RNU6-769P	snRNA
ENSG00000130775.15	0.00272137	0.000731429	3.72062	0.000198736	0.00379181	1.00189	THEMIS2	protein_coding
ENSG00000163219.11	0.00203745	0.000547553	3.72101	0.000198426	0.00379181	1.00141	ARHGAP25	protein_coding
ENSG00000160613.12	-0.00149201	0.000401019	-3.72054	0.000198801	0.00379181	0.998966	PCSK7	protein_coding
ENSG00000157540.20	0.00127089	0.000341615	3.72023	0.00019904	0.00379385	1.00088	DYRK1A	protein_coding
ENSG00000197381.15	-0.00267122	0.000718124	-3.71972	0.000199441	0.00379899	0.99815	ADARB1	protein_coding
ENSG00000156802.12	-0.00270841	0.000728529	-3.71764	0.000201092	0.00382539	0.998124	ATAD2	protein_coding
ENSG00000136709.11	-0.0013315	0.000358144	-3.71778	0.000200984	0.00382539	0.999078	WDR33	protein_coding
ENSG00000181826.9	0.00295267	0.000794386	3.71692	0.000201669	0.00383384	1.00205	RELL1	protein_coding
ENSG00000103313.12	0.00331615	0.000892477	3.71568	0.000202661	0.00385017	1.0023	MEFV	protein_coding
ENSG00000101109.11	0.00168041	0.000452389	3.71453	0.000203578	0.00386249	1.00117	STK4	protein_coding
ENSG00000105810.9	-0.00224968	0.000605633	-3.71459	0.000203529	0.00386249	0.998442	CDK6	protein_coding
ENSG00000284154.1	0.00457619	0.00123224	3.71371	0.000204243	0.00387001	1.00318	MIR3605	miRNA
ENSG00000011523.13	-0.0025502	0.00068668	-3.71382	0.000204156	0.00387001	0.998234	CEP68	protein_coding
ENSG00000237886.1	0.00364303	0.000981038	3.71344	0.000204462	0.00387162	1.00253	NALT1	antisense
ENSG00000060971.17	0.00183031	0.000492924	3.71316	0.000204684	0.00387329	1.00127	ACAA1	protein_coding
ENSG00000101474.11	0.00317656	0.000855566	3.71282	0.000204963	0.00387602	1.0022	APMAP	protein_coding
ENSG00000189144.13	-0.00175183	0.000471869	-3.71252	0.000205202	0.003878	0.998786	ZNF573	protein_coding
ENSG00000206991.1	-0.00492537	0.0013268	-3.71223	0.000205443	0.00388001	0.996592	RNU6-610P	snRNA
ENSG00000251259.1	0.00365326	0.000984249	3.71173	0.000205851	0.00388517	1.00254	AC004069.1	lincRNA
ENSG00000033627.16	0.0020672	0.000557007	3.71125	0.000206234	0.0038876	1.00143	ATP6V0A1	protein_coding
ENSG00000118520.14	0.00693523	0.00186871	3.71124	0.00020625	0.0038876	1.00482	ARG1	protein_coding
ENSG00000284709.1	0.00373291	0.00100626	3.7097	0.000207504	0.00390869	1.00259	KF456110.1	processed_pseudogene
ENSG00000125246.15	-0.00238491	0.000643089	-3.70852	0.000208473	0.00392439	0.998348	CLYBL	protein_coding
ENSG00000211886.1	-0.00370059	0.000997932	-3.70825	0.000208693	0.00392596	0.997438	TRAJ3	TR_J_gene
ENSG00000273213.2	0.00443226	0.00119588	3.70628	0.000210324	0.00395406	1.00308	AC239798.4	processed_transcript
ENSG00000233030.2	0.00571231	0.00154159	3.70546	0.000211006	0.0039643	1.00397	AC243772.2	antisense
ENSG00000253542.7	0.00304687	0.000822352	3.70507	0.000211333	0.00396786	1.00211	SDR16C6P	transcribed_unitary_pseudogene
ENSG00000204178.10	-0.00151928	0.000410215	-3.70363	0.000212539	0.0039879	0.998947	MACO1	protein_coding
ENSG00000105327.17	0.00294947	0.000796432	3.70336	0.000212763	0.00398951	1.00205	BBC3	protein_coding
ENSG00000225648.5	-0.00338462	0.000914073	-3.70279	0.000213242	0.0039959	0.997657	SBDSP1	transcribed_unprocessed_pseudogene
ENSG00000108306.12	0.00193469	0.000522579	3.7022	0.000213739	0.00400002	1.00134	FBXL20	protein_coding
ENSG00000144645.13	-0.00447297	0.00120819	-3.70222	0.000213722	0.00400002	0.996904	OSBPL10	protein_coding
ENSG00000182487.12	0.0033906	0.000916049	3.70133	0.000214473	0.00400855	1.00235	NCF1B	transcribed_unprocessed_pseudogene
ENSG00000159921.15	-0.00123769	0.000334375	-3.70149	0.000214336	0.00400855	0.999142	GNE	protein_coding
ENSG00000090487.10	0.00159273	0.000430468	3.69999	0.000215605	0.0040271	1.0011	SPG21	protein_coding
ENSG00000257696.1	0.00364623	0.000985547	3.6997	0.000215855	0.00402915	1.00253	AC010203.2	antisense
ENSG00000072954.6	0.00272528	0.000736793	3.69884	0.000216587	0.0040402	1.00189	TMEM38A	protein_coding
ENSG00000119509.12	-0.00159779	0.000432035	-3.69828	0.000217062	0.00404644	0.998893	INVS	protein_coding
ENSG00000198589.11	-0.00217144	0.000587232	-3.69775	0.000217518	0.00405232	0.998496	LRBA	protein_coding
ENSG00000189013.14	0.00902938	0.00244249	3.69679	0.00021834	0.00406502	1.00628	KIR2DL4	protein_coding
ENSG00000236778.7	0.00199127	0.000538762	3.69601	0.000219016	0.00407115	1.00138	INTS6-AS1	antisense
ENSG00000145332.13	0.00223944	0.000605871	3.69623	0.000218827	0.00407115	1.00155	KLHL8	protein_coding
ENSG00000112365.4	-0.0017031	0.000460804	-3.69592	0.000219093	0.00407115	0.99882	ZBTB24	protein_coding
ENSG00000279602.1	-0.00623559	0.00168751	-3.69515	0.000219757	0.00408086	0.995687	AC109326.1	TEC
ENSG00000009954.10	-0.00172363	0.000466518	-3.69467	0.000220174	0.00408596	0.998806	BAZ1B	protein_coding
ENSG00000138078.15	-0.0019433	0.000526011	-3.6944	0.000220403	0.00408666	0.998654	PREPL	protein_coding
ENSG00000255321.1	0.00325026	0.000879805	3.6943	0.000220495	0.00408666	1.00226	AC068389.3	antisense
ENSG00000229646.2	-0.00351868	0.000952734	-3.69325	0.000221408	0.00410095	0.997564	AL109914.1	lincRNA
ENSG00000130338.12	-0.00169836	0.00045998	-3.69224	0.000222291	0.00411466	0.998823	TULP4	protein_coding
ENSG00000141582.14	0.00193463	0.000524045	3.69172	0.00022274	0.00411836	1.00134	CBX4	protein_coding
ENSG00000180712.3	0.00425174	0.00115171	3.69168	0.000222776	0.00411836	1.00295	LINC02363	lincRNA
ENSG00000224672.4	0.00299343	0.000810948	3.69128	0.000223132	0.00411966	1.00208	RPL17P10	processed_pseudogene
ENSG00000151779.12	-0.00181636	0.000492057	-3.69135	0.000223065	0.00411966	0.998742	NBAS	protein_coding
ENSG00000260269.5	-0.00280772	0.000760871	-3.69013	0.000224136	0.00413148	0.998056	AC105036.3	processed_transcript
ENSG00000186265.9	-0.00411848	0.00111609	-3.6901	0.000224167	0.00413148	0.997149	BTLA	protein_coding
ENSG00000112053.13	0.00430835	0.00116755	3.69006	0.000224202	0.00413148	1.00299	SLC26A8	protein_coding
ENSG00000024862.17	0.00232841	0.000631383	3.68779	0.000226214	0.00416588	1.00162	CCDC28A	protein_coding
ENSG00000198825.13	-0.00261817	0.000710093	-3.68708	0.000226842	0.00417479	0.998187	INPP5F	protein_coding
ENSG00000008869.11	-0.00159352	0.000432293	-3.68621	0.000227621	0.00418646	0.998896	HEATR5B	protein_coding
ENSG00000213390.10	0.00231468	0.000628085	3.6853	0.000228434	0.00419312	1.00161	ARHGAP19	protein_coding
ENSG00000143622.10	0.00265801	0.000721274	3.68515	0.000228565	0.00419312	1.00184	RIT1	protein_coding
ENSG00000188092.14	-0.00191397	0.000519305	-3.68564	0.00022813	0.00419312	0.998674	GPR89B	protein_coding
ENSG00000120008.15	-0.00199528	0.000541392	-3.68546	0.000228288	0.00419312	0.998618	WDR11	protein_coding
ENSG00000197503.4	0.00230843	0.000626467	3.68483	0.000228852	0.00419572	1.0016	LINC00477	lincRNA
ENSG00000261490.1	0.00168348	0.000456986	3.68387	0.000229718	0.00420892	1.00117	AC005674.2	sense_overlapping
ENSG00000201944.1	-0.00280776	0.000762237	-3.68358	0.00022998	0.00421105	0.998056	RF00139	snoRNA
ENSG00000158109.14	0.00214218	0.000581733	3.68241	0.00023104	0.00422776	1.00149	TPRG1L	protein_coding
ENSG00000256723.1	-0.00346337	0.000940766	-3.68144	0.000231924	0.00424126	0.997602	AP003717.3	processed_pseudogene
ENSG00000166598.14	-0.0020631	0.000560467	-3.68103	0.000232292	0.00424529	0.998571	HSP90B1	protein_coding
ENSG00000243406.6	-0.0018863	0.000512755	-3.67876	0.000234369	0.00427512	0.998693	MRPS31P5	transcribed_unprocessed_pseudogene
ENSG00000172594.12	0.00351482	0.000955398	3.67891	0.000234235	0.00427512	1.00244	SMPDL3A	protein_coding
ENSG00000232104.3	-0.00247517	0.000672777	-3.67903	0.000234118	0.00427512	0.998286	RFX3-AS1	lincRNA
ENSG00000101350.7	-0.00138832	0.000377439	-3.67826	0.000234827	0.00427807	0.999038	KIF3B	protein_coding
ENSG00000200830.1	0.00465272	0.00126488	3.67839	0.000234712	0.00427807	1.00323	RN7SKP134	misc_RNA
ENSG00000248124.7	-0.00213299	0.000579925	-3.67805	0.000235023	0.00427893	0.998523	RRN3P1	transcribed_unprocessed_pseudogene
ENSG00000267559.5	0.00256317	0.00069695	3.6777	0.000235349	0.00428217	1.00178	AL158154.2	lincRNA
ENSG00000131269.16	-0.00167478	0.000455714	-3.67506	0.000237793	0.00432391	0.99884	ABCB7	protein_coding
ENSG00000196470.11	0.00167667	0.000456252	3.67488	0.000237959	0.0043242	1.00116	SIAH1	protein_coding
ENSG00000232310.7	0.00379783	0.00103353	3.67461	0.00023821	0.00432604	1.00264	AL078590.3	lincRNA
ENSG00000230673.3	0.0016519	0.000449688	3.67345	0.000239301	0.00434038	1.00115	PABPC1P3	processed_pseudogene
ENSG00000103187.7	0.00260848	0.000710083	3.67348	0.000239268	0.00434038	1.00181	COTL1	protein_coding
ENSG00000251179.1	0.00567895	0.00154637	3.67245	0.000240238	0.00435191	1.00394	TMEM92-AS1	antisense
ENSG00000152217.18	-0.00328137	0.000893493	-3.67252	0.000240166	0.00435191	0.997728	SETBP1	protein_coding
ENSG00000163214.20	-0.00135792	0.00036999	-3.67016	0.000242399	0.00438828	0.999059	DHX57	protein_coding
ENSG00000198700.9	-0.00144263	0.000393119	-3.6697	0.000242835	0.00439343	0.999001	IPO9	protein_coding
ENSG00000218305.4	0.00309921	0.000844732	3.66887	0.00024363	0.00440504	1.00215	CDC14C	protein_coding
ENSG00000235193.1	0.00455509	0.0012417	3.66843	0.000244042	0.00440697	1.00316	AC006987.2	unprocessed_pseudogene
ENSG00000167286.9	-0.00443586	0.0012092	-3.66843	0.000244041	0.00440697	0.99693	CD3D	protein_coding
ENSG00000077420.15	0.00241448	0.00065834	3.66753	0.000244906	0.00441981	1.00167	APBB1IP	protein_coding
ENSG00000104974.11	0.00311837	0.000850328	3.66726	0.000245167	0.00442175	1.00216	LILRA1	protein_coding
ENSG00000105866.14	-0.00207063	0.000564657	-3.66705	0.000245363	0.00442252	0.998566	SP4	protein_coding
ENSG00000140396.12	0.00179336	0.00048912	3.66652	0.000245878	0.00442903	1.00124	NCOA2	protein_coding
ENSG00000141570.10	0.00267388	0.000729314	3.66629	0.000246092	0.00443012	1.00186	CBX8	protein_coding
ENSG00000156642.16	0.00205789	0.000561419	3.66551	0.000246844	0.00444089	1.00143	NPTN	protein_coding
ENSG00000261229.6	0.00329391	0.000898758	3.66496	0.000247375	0.00444764	1.00229	AC021483.2	lincRNA
ENSG00000170873.18	-0.00279507	0.000762679	-3.6648	0.000247528	0.00444764	0.998064	MTSS1	protein_coding
ENSG00000142186.16	0.00231693	0.000632561	3.66278	0.000249496	0.00448021	1.00161	SCYL1	protein_coding
ENSG00000275363.1	0.00697061	0.00190366	3.66168	0.000250569	0.00449667	1.00484	AC100757.3	unprocessed_pseudogene
ENSG00000170525.20	0.00347871	0.000950357	3.66042	0.000251802	0.00451318	1.00241	PFKFB3	protein_coding
ENSG00000159882.12	0.00299004	0.000816833	3.66053	0.000251694	0.00451318	1.00207	ZNF230	protein_coding
ENSG00000188158.15	0.00329703	0.000900896	3.65972	0.000252491	0.00452273	1.00229	NHS	protein_coding
ENSG00000135127.11	-0.00257409	0.000703765	-3.6576	0.000254593	0.00455472	0.998217	BICDL1	protein_coding
ENSG00000225938.1	-0.00329335	0.000900396	-3.65766	0.000254523	0.00455472	0.99772	AL109741.1	antisense
ENSG00000086062.12	0.0021248	0.000581	3.65714	0.000255047	0.00456001	1.00147	B4GALT1	protein_coding
ENSG00000105855.9	0.00569708	0.00155796	3.65676	0.000255426	0.0045615	1.00396	ITGB8	protein_coding
ENSG00000243273.1	0.00767825	0.00209975	3.65674	0.000255446	0.0045615	1.00534	AC020636.1	antisense
ENSG00000274346.1	-0.00226224	0.000618713	-3.65636	0.000255818	0.00456336	0.998433	AC016999.2	unprocessed_pseudogene
ENSG00000211771.1	-0.00435065	0.0011899	-3.65631	0.000255867	0.00456336	0.996989	TRBJ2-7	TR_J_gene
ENSG00000111913.18	0.00190987	0.000522429	3.65576	0.000256424	0.00457047	1.00132	RIPOR2	protein_coding
ENSG00000141337.12	0.00185825	0.000508372	3.6553	0.000256886	0.00457587	1.00129	ARSG	protein_coding
ENSG00000258976.1	0.00507004	0.00138776	3.65341	0.000258782	0.00460427	1.00352	AC013451.2	lincRNA
ENSG00000282572.2	0.00450053	0.0012319	3.65333	0.000258866	0.00460427	1.00312	AC215522.2	processed_transcript
ENSG00000280587.1	0.0034477	0.000943749	3.65319	0.000259003	0.00460427	1.00239	LINC01348	lincRNA
ENSG00000105053.10	0.00137503	0.000376403	3.65307	0.000259119	0.00460427	1.00095	VRK3	protein_coding
ENSG00000285987.1	0.00407718	0.00111631	3.65237	0.000259834	0.00461413	1.00283	AL157886.1	antisense
ENSG00000237927.1	0.0054669	0.00149704	3.65181	0.000260403	0.0046214	1.0038	AL078604.2	lincRNA
ENSG00000167565.12	0.00230938	0.000632459	3.65144	0.000260777	0.00462518	1.0016	SERTAD3	protein_coding
ENSG00000249876.1	0.00464546	0.00127283	3.64972	0.000262522	0.00465041	1.00323	AC010285.2	processed_pseudogene
ENSG00000264833.1	0.00259336	0.000710543	3.64983	0.000262409	0.00465041	1.0018	RN7SL468P	misc_RNA
ENSG00000119401.10	-0.00209728	0.000574757	-3.64899	0.000263274	0.00466086	0.998547	TRIM32	protein_coding
ENSG00000101084.17	0.00270081	0.000740379	3.64787	0.000264422	0.0046774	1.00187	RAB5IF	protein_coding
ENSG00000204592.8	0.00265114	0.000726784	3.64776	0.000264532	0.0046774	1.00184	HLA-E	protein_coding
ENSG00000072858.10	-0.00206819	0.000567116	-3.64686	0.000265464	0.00468706	0.998567	SIDT1	protein_coding
ENSG00000257127.6	0.00371939	0.00101994	3.64666	0.000265672	0.00468706	1.00258	CLLU1	processed_transcript
ENSG00000234028.3	0.00217746	0.000597095	3.64676	0.000265565	0.00468706	1.00151	AC062029.1	antisense
ENSG00000229191.1	0.00355037	0.00097361	3.6466	0.000265728	0.00468706	1.00246	AL358473.1	antisense
ENSG00000283597.2	0.00441292	0.00121065	3.6451	0.000267287	0.0047096	1.00306	FAM169B	protein_coding
ENSG00000135655.15	0.00294689	0.000808463	3.64506	0.000267333	0.0047096	1.00204	USP15	protein_coding
ENSG00000012779.10	0.00289738	0.000794996	3.64452	0.000267892	0.00471657	1.00201	ALOX5	protein_coding
ENSG00000260083.1	-0.00262568	0.000720496	-3.64427	0.000268152	0.00471827	0.998182	MIR762HG	antisense
ENSG00000110446.10	0.00286279	0.000785845	3.64294	0.000269543	0.00473985	1.00199	SLC15A3	protein_coding
ENSG00000123836.14	0.00305562	0.000838854	3.64262	0.000269879	0.00474286	1.00212	PFKFB2	protein_coding
ENSG00000273058.2	-0.00360817	0.00099064	-3.64226	0.00027025	0.00474361	0.997502	AL359921.2	antisense
ENSG00000275198.1	0.00280247	0.000769429	3.64227	0.000270242	0.00474361	1.00194	AL512791.2	lincRNA
ENSG00000264659.1	0.0031414	0.00086254	3.64204	0.000270488	0.00474489	1.00218	AC064805.2	antisense
ENSG00000137101.12	-0.00519781	0.00142725	-3.64183	0.000270706	0.00474583	0.996404	CD72	protein_coding
ENSG00000279995.1	0.00311803	0.000856247	3.64151	0.000271042	0.00474883	1.00216	AC139792.3	TEC
ENSG00000169891.17	0.00347446	0.000954192	3.64126	0.000271311	0.00475066	1.00241	REPS2	protein_coding
ENSG00000180316.12	0.00391254	0.00107463	3.64083	0.000271765	0.00475572	1.00272	PNPLA1	protein_coding
ENSG00000143119.13	0.00171509	0.000471092	3.64066	0.000271941	0.00475592	1.00119	CD53	protein_coding
ENSG00000171988.18	0.00227514	0.000625243	3.63881	0.000273904	0.00478734	1.00158	JMJD1C	protein_coding
ENSG00000273226.1	-0.00222877	0.000612548	-3.63852	0.000274208	0.00478975	0.998456	AL391834.2	antisense
ENSG00000007312.12	-0.00485567	0.00133472	-3.63796	0.00027481	0.00479736	0.99664	CD79B	protein_coding
ENSG00000182307.13	-0.00139475	0.000383406	-3.63779	0.000274983	0.00479748	0.999034	C8orf33	protein_coding
ENSG00000125510.15	0.0029063	0.000798993	3.63746	0.000275345	0.00480089	1.00202	OPRL1	protein_coding
ENSG00000178607.15	0.00261511	0.000719	3.63714	0.000275678	0.00480379	1.00181	ERN1	protein_coding
ENSG00000163947.11	-0.00180042	0.000495103	-3.63645	0.000276423	0.00480805	0.998753	ARHGEF3	protein_coding
ENSG00000279884.1	0.00325454	0.00089496	3.63652	0.000276341	0.00480805	1.00226	AC010894.5	TEC
ENSG00000160818.16	-0.0023034	0.000633415	-3.63648	0.000276385	0.00480805	0.998405	GPATCH4	protein_coding
ENSG00000072864.14	0.00249781	0.00068725	3.6345	0.000278518	0.00484157	1.00173	NDE1	protein_coding
ENSG00000144909.7	0.00202069	0.000556273	3.63255	0.000280634	0.00487543	1.0014	OSBPL11	protein_coding
ENSG00000165626.17	0.00531833	0.00146432	3.63194	0.0002813	0.00488405	1.00369	BEND7	protein_coding
ENSG00000262001.1	0.00225019	0.000619665	3.63131	0.000281988	0.00489306	1.00156	DLGAP1-AS2	antisense
ENSG00000111581.9	-0.00207367	0.000571149	-3.63069	0.000282662	0.00489885	0.998564	NUP107	protein_coding
ENSG00000111802.13	0.00283906	0.000781938	3.6308	0.000282546	0.00489885	1.00197	TDP2	protein_coding
ENSG00000182149.20	0.0013981	0.000385204	3.62951	0.000283956	0.00491832	1.00097	IST1	protein_coding
ENSG00000124203.6	-0.00248082	0.000683575	-3.62919	0.00028431	0.0049215	0.998282	ZNF831	protein_coding
ENSG00000055130.15	-0.00184294	0.000507914	-3.62846	0.00028512	0.00493256	0.998723	CUL1	protein_coding
ENSG00000228037.1	-0.00455603	0.00125587	-3.6278	0.000285843	0.00494211	0.996847	AL139246.3	lincRNA
ENSG00000140598.14	-0.00164589	0.000453709	-3.62763	0.000286035	0.00494246	0.99886	EFL1	protein_coding
ENSG00000197362.14	-0.00172435	0.000475415	-3.62703	0.000286698	0.00495095	0.998805	ZNF786	protein_coding
ENSG00000101336.13	0.00291447	0.000803948	3.6252	0.000288734	0.00498313	1.00202	HCK	protein_coding
ENSG00000144559.10	-0.0025268	0.000697098	-3.62475	0.000289243	0.00498893	0.99825	TAMM41	protein_coding
ENSG00000213903.8	0.00326225	0.000900188	3.62396	0.000290125	0.00499466	1.00226	LTB4R	protein_coding
ENSG00000243284.1	0.00535932	0.00147879	3.62412	0.000289944	0.00499466	1.00372	VSIG8	protein_coding
ENSG00000117616.17	0.0020897	0.000576656	3.62383	0.000290268	0.00499466	1.00145	RSRP1	protein_coding
ENSG00000136925.14	-0.00139417	0.000384721	-3.62385	0.00029025	0.00499466	0.999034	TSTD2	protein_coding
ENSG00000138433.15	0.00245209	0.000676786	3.62314	0.000291049	0.0050051	1.0017	CIR1	protein_coding
ENSG00000131165.14	0.00229349	0.000633116	3.62255	0.000291717	0.0050136	1.00159	CHMP1A	protein_coding
ENSG00000101096.19	-0.00258479	0.00071358	-3.62229	0.000292005	0.00501556	0.99821	NFATC2	protein_coding
ENSG00000173930.8	0.00285176	0.000787377	3.62185	0.000292504	0.00502115	1.00198	SLCO4C1	protein_coding
ENSG00000110660.14	-0.00264959	0.000731616	-3.62156	0.000292833	0.0050238	0.998165	SLC35F2	protein_coding
ENSG00000266896.1	0.00224215	0.000619143	3.62138	0.000293038	0.00502433	1.00156	AL354892.3	sense_intronic
ENSG00000154511.11	-0.00302436	0.000835402	-3.62025	0.000294322	0.00504334	0.997906	FAM69A	protein_coding
ENSG00000180891.12	0.00308051	0.000850985	3.61994	0.000294677	0.00504622	1.00214	CUEDC1	protein_coding
ENSG00000132185.16	-0.00543869	0.00150249	-3.61979	0.00029484	0.00504622	0.996237	FCRLA	protein_coding
ENSG00000271582.1	-0.00459765	0.00127034	-3.61924	0.000295475	0.0050541	0.996818	AC073111.2	processed_pseudogene
ENSG00000116874.11	-0.00195302	0.000539685	-3.61882	0.000295946	0.00505915	0.998647	WARS2	protein_coding
ENSG00000243943.9	-0.00149837	0.000414137	-3.61806	0.000296824	0.00506815	0.998962	ZNF512	protein_coding
ENSG00000148187.17	-0.00124065	0.000342895	-3.61816	0.000296707	0.00506815	0.99914	MRRF	protein_coding
ENSG00000238058.1	-0.00279745	0.000773692	-3.61571	0.000299528	0.0051113	0.998063	AL355574.1	antisense
ENSG00000251002.7	0.00376601	0.00104189	3.61461	0.000300804	0.00513004	1.00261	AC244502.1	processed_transcript
ENSG00000185418.15	-0.00199774	0.00055278	-3.61399	0.000301524	0.00513927	0.998616	TARSL2	protein_coding
ENSG00000268734.1	0.00334958	0.0009271	3.61297	0.000302713	0.00515649	1.00232	AC245128.3	lincRNA
ENSG00000139116.18	-0.00273	0.00075567	-3.61269	0.000303036	0.00515895	0.998109	KIF21A	protein_coding
ENSG00000144749.13	-0.00221125	0.000612202	-3.61196	0.000303895	0.00517051	0.998468	LRIG1	protein_coding
ENSG00000164975.15	-0.00156545	0.000433449	-3.6116	0.000304308	0.0051745	0.998916	SNAPC3	protein_coding
ENSG00000136827.11	0.00137042	0.000379574	3.61041	0.000305718	0.0051954	1.00095	TOR1A	protein_coding
ENSG00000160299.16	-0.00208343	0.000577139	-3.60993	0.00030628	0.00519576	0.998557	PCNT	protein_coding
ENSG00000261468.1	0.00210165	0.000582185	3.60993	0.000306278	0.00519576	1.00146	AC096921.2	sense_overlapping
ENSG00000274776.1	0.00249279	0.000690521	3.61001	0.00030618	0.00519576	1.00173	AC090241.3	lincRNA
ENSG00000173327.7	0.0024882	0.000689315	3.60967	0.000306587	0.00519793	1.00173	MAP3K11	protein_coding
ENSG00000033170.16	-0.00211491	0.000585971	-3.60924	0.0003071	0.00520356	0.998535	FUT8	protein_coding
ENSG00000228506.1	-0.00249531	0.0006916	-3.60802	0.000308543	0.00522495	0.998272	AL513550.1	antisense
ENSG00000109586.11	0.00172135	0.000477205	3.60715	0.000309582	0.00523946	1.00119	GALNT7	protein_coding
ENSG00000023445.13	-0.00414065	0.0011482	-3.6062	0.000310718	0.0052556	0.997134	BIRC3	protein_coding
ENSG00000176236.6	0.00983349	0.00272729	3.60558	0.000311452	0.00526492	1.00684	C10orf111	bidirectional_promoter_lncRNA
ENSG00000280035.1	0.00393093	0.00109044	3.60491	0.000312256	0.00527543	1.00273	AC011676.5	TEC
ENSG00000103365.15	-0.00193947	0.000538127	-3.60411	0.000313228	0.00528875	0.998657	GGA2	protein_coding
ENSG00000151687.14	-0.00209839	0.000582339	-3.60338	0.000314109	0.00529743	0.998547	ANKAR	protein_coding
ENSG00000206754.1	-0.00258594	0.000717635	-3.60342	0.000314055	0.00529743	0.998209	SNORD101	snoRNA
ENSG00000249532.5	0.00312856	0.000868333	3.60295	0.000314623	0.00530298	1.00217	AC106864.1	antisense
ENSG00000275888.1	0.00386513	0.00107282	3.60279	0.000314819	0.00530318	1.00268	AC132872.3	antisense
ENSG00000211653.2	-0.00774847	0.00215172	-3.60106	0.000316924	0.0053262	0.994644	IGLV1-40	IG_V_gene
ENSG00000198455.4	-0.00200678	0.000557236	-3.60131	0.000316612	0.0053262	0.99861	ZXDB	protein_coding
ENSG00000259028.1	0.00710663	0.00197337	3.60127	0.000316669	0.0053262	1.00494	AL135746.1	lincRNA
ENSG00000197024.8	0.0013849	0.000384576	3.60112	0.000316852	0.0053262	1.00096	ZNF398	protein_coding
ENSG00000236297.1	-0.00270825	0.000752222	-3.60033	0.000317808	0.00533796	0.998125	AC048351.1	transcribed_processed_pseudogene
ENSG00000261687.1	-0.00363798	0.00101053	-3.60008	0.000318114	0.00533998	0.997482	AC068724.1	antisense
ENSG00000263786.1	0.00355452	0.000987525	3.59943	0.000318919	0.00534738	1.00247	AC022211.1	sense_intronic
ENSG00000118515.11	0.00292939	0.000813851	3.59942	0.000318925	0.00534738	1.00203	SGK1	protein_coding
ENSG00000222898.1	0.00452713	0.00125788	3.59902	0.000319417	0.00534941	1.00314	RN7SKP97	misc_RNA
ENSG00000147854.16	-0.00195049	0.000541946	-3.59905	0.000319382	0.00534941	0.998649	UHRF2	protein_coding
ENSG00000198799.11	-0.00141934	0.000394453	-3.59825	0.000320371	0.00536226	0.999017	LRIG2	protein_coding
ENSG00000205853.10	-0.00301117	0.00083691	-3.59797	0.000320714	0.00536489	0.997915	RFPL3S	lincRNA
ENSG00000258284.1	-0.00332437	0.000924209	-3.59699	0.000321921	0.00537374	0.997698	POLR2KP1	processed_pseudogene
ENSG00000253320.6	0.00219506	0.000610258	3.59694	0.000321989	0.00537374	1.00152	AZIN1-AS1	antisense
ENSG00000065150.18	-0.00209446	0.000582242	-3.59723	0.000321625	0.00537374	0.998549	IPO5	protein_coding
ENSG00000197734.9	0.00165765	0.000460834	3.59707	0.000321826	0.00537374	1.00115	C14orf178	protein_coding
ENSG00000196405.12	-0.00237056	0.00065916	-3.59633	0.000322742	0.00538321	0.998358	EVL	protein_coding
ENSG00000204304.11	0.00245993	0.000684235	3.59514	0.000324211	0.00540458	1.00171	PBX2	protein_coding
ENSG00000283785.1	0.00366985	0.00102085	3.59489	0.000324527	0.00540672	1.00255	MIR15A	miRNA
ENSG00000054967.12	0.00263809	0.000733881	3.59471	0.000324753	0.00540736	1.00183	RELT	protein_coding
ENSG00000271327.1	0.00265071	0.000737534	3.59401	0.000325623	0.00541559	1.00184	AC010201.2	lincRNA
ENSG00000124608.4	-0.00171367	0.000476794	-3.59415	0.000325458	0.00541559	0.998813	AARS2	protein_coding
ENSG00000119408.16	0.00272521	0.000758414	3.5933	0.000326517	0.00542733	1.00189	NEK6	protein_coding
ENSG00000261766.1	0.00209288	0.000582605	3.59227	0.000327804	0.00544559	1.00145	AC133550.2	antisense
ENSG00000255031.5	0.00281364	0.000783308	3.592	0.000328146	0.00544812	1.00195	AP002807.1	antisense
ENSG00000008086.11	0.00223546	0.000622658	3.5902	0.000330428	0.00547971	1.00155	CDKL5	protein_coding
ENSG00000219200.11	0.00274645	0.000764958	3.59033	0.000330259	0.00547971	1.00191	RNASEK	protein_coding
ENSG00000110651.11	-0.00280004	0.000780031	-3.58966	0.000331115	0.00548795	0.998061	CD81	protein_coding
ENSG00000235011.2	0.00245338	0.000683525	3.58931	0.000331554	0.00549206	1.0017	AL353651.1	lincRNA
ENSG00000140943.16	-0.00126312	0.000351958	-3.58883	0.000332166	0.00549589	0.999125	MBTPS1	protein_coding
ENSG00000131480.8	0.0041109	0.00114546	3.58886	0.000332124	0.00549589	1.00285	AOC2	protein_coding
ENSG00000143499.13	-0.00190689	0.000531451	-3.58808	0.000333119	0.00550533	0.998679	SMYD2	protein_coding
ENSG00000242525.1	0.0032994	0.000919522	3.58817	0.000333002	0.00550533	1.00229	OR7E100P	unprocessed_pseudogene
ENSG00000120696.8	0.00342561	0.000954842	3.58762	0.000333708	0.00550876	1.00238	KBTBD7	protein_coding
ENSG00000138641.16	0.001675	0.000466873	3.5877	0.000333603	0.00550876	1.00116	HERC3	protein_coding
ENSG00000213246.6	0.00249705	0.000696133	3.58703	0.000334465	0.00551641	1.00173	SUPT4H1	protein_coding
ENSG00000206448.3	-0.00407055	0.00113482	-3.58696	0.000334554	0.00551641	0.997182	PPIAP30	processed_pseudogene
ENSG00000251161.3	0.0032776	0.000913867	3.58652	0.00033512	0.00552258	1.00227	AC020661.1	lincRNA
ENSG00000069020.18	-0.00234605	0.000654235	-3.58594	0.000335871	0.00553181	0.998375	MAST4	protein_coding
ENSG00000153044.9	-0.00322817	0.000900498	-3.58487	0.000337242	0.0055512	0.997765	CENPH	protein_coding
ENSG00000183813.6	-0.00301425	0.000840905	-3.58454	0.000337677	0.0055552	0.997913	CCR4	protein_coding
ENSG00000259508.1	0.00324551	0.000905467	3.58435	0.000337924	0.00555609	1.00225	AL132801.1	lincRNA
ENSG00000166446.14	-0.00202145	0.000564075	-3.58366	0.000338812	0.00556752	0.9986	CDYL2	protein_coding
ENSG00000235834.1	0.00421044	0.00117552	3.58177	0.000341269	0.0056047	1.00292	Z93022.1	sense_intronic
ENSG00000224745.1	0.00389737	0.00108906	3.57865	0.00034537	0.00566883	1.00271	AC063965.1	sense_intronic
ENSG00000164073.10	-0.00131155	0.000366545	-3.57814	0.00034605	0.00567676	0.999091	MFSD8	protein_coding
ENSG00000249309.1	0.00464367	0.00129792	3.57778	0.000346521	0.00567802	1.00322	AC020703.1	antisense
ENSG00000230030.1	0.00400867	0.00112041	3.57785	0.000346438	0.00567802	1.00278	AL353742.1	lincRNA
ENSG00000164691.17	0.00210218	0.000587597	3.57759	0.00034678	0.00567904	1.00146	TAGAP	protein_coding
ENSG00000111837.11	0.00410646	0.00114799	3.57709	0.000347443	0.00568667	1.00285	MAK	protein_coding
ENSG00000185973.10	0.00154987	0.000433495	3.57529	0.000349836	0.00572259	1.00107	TMLHE	protein_coding
ENSG00000170634.12	-0.00140967	0.000394431	-3.57393	0.000351665	0.00574599	0.999023	ACYP2	protein_coding
ENSG00000172673.10	-0.00357396	0.000999986	-3.574	0.000351563	0.00574599	0.997526	THEMIS	protein_coding
ENSG00000279744.1	0.0026522	0.000742214	3.57336	0.000352435	0.00575206	1.00184	AC132938.5	TEC
ENSG00000113649.11	-0.00209707	0.000586854	-3.57341	0.000352359	0.00575206	0.998547	TCERG1	protein_coding
ENSG00000213930.11	-0.00187584	0.00052507	-3.57256	0.000353508	0.0057663	0.998701	GALT	protein_coding
ENSG00000133063.15	0.00360262	0.00100877	3.57129	0.000355234	0.00579118	1.0025	CHIT1	protein_coding
ENSG00000167984.17	-0.00222616	0.000623464	-3.57062	0.000356131	0.00580252	0.998458	NLRC3	protein_coding
ENSG00000027075.14	-0.00203271	0.000569448	-3.56962	0.000357495	0.00581925	0.998592	PRKCH	protein_coding
ENSG00000204701.2	0.00339703	0.000951662	3.56957	0.000357561	0.00581925	1.00236	OR2J3	protein_coding
ENSG00000157734.13	-0.00323332	0.000905916	-3.56912	0.000358181	0.00582179	0.997761	SNX22	protein_coding
ENSG00000262877.4	0.00423002	0.0011852	3.56905	0.000358276	0.00582179	1.00294	AC110285.2	lincRNA
ENSG00000106608.16	-0.00158441	0.000443933	-3.56902	0.000358323	0.00582179	0.998902	URGCP	protein_coding
ENSG00000129353.14	0.00291721	0.000817605	3.56799	0.000359729	0.00584135	1.00202	SLC44A2	protein_coding
ENSG00000141505.11	0.00271799	0.000761821	3.56775	0.000360065	0.00584352	1.00189	ASGR1	protein_coding
ENSG00000255398.2	0.0046275	0.0012975	3.56649	0.000361798	0.00586833	1.00321	HCAR3	protein_coding
ENSG00000155066.15	0.00257326	0.000721789	3.56511	0.000363704	0.00589593	1.00179	PROM2	protein_coding
ENSG00000182197.11	0.00201906	0.000566832	3.56201	0.000368029	0.00596269	1.0014	EXT1	protein_coding
ENSG00000176171.11	-0.00227725	0.000639394	-3.56157	0.000368637	0.00596919	0.998423	BNIP3	protein_coding
ENSG00000149308.16	-0.00188729	0.000530029	-3.56073	0.000369819	0.00598496	0.998693	NPAT	protein_coding
ENSG00000265491.4	-0.00108226	0.000304021	-3.55983	0.000371101	0.00600235	0.99925	RNF115	protein_coding
ENSG00000270276.2	0.00286841	0.000805864	3.55942	0.000371669	0.00600816	1.00199	HIST2H4B	protein_coding
ENSG00000277791.4	0.00265132	0.000744972	3.55895	0.00037234	0.00601563	1.00184	PSMB3	protein_coding
ENSG00000138095.18	-0.00215858	0.000606577	-3.55862	0.000372813	0.0060199	0.998505	LRPPRC	protein_coding
ENSG00000285006.1	0.00364896	0.00102559	3.55792	0.000373799	0.00602908	1.00253	AC005280.3	processed_transcript
ENSG00000168126.3	0.00602168	0.00169242	3.55804	0.000373637	0.00602908	1.00418	OR2W6P	unprocessed_pseudogene
ENSG00000185684.14	-0.00232108	0.000652398	-3.55776	0.000374025	0.00602935	0.998392	EP400P1	transcribed_unprocessed_pseudogene
ENSG00000197943.9	0.00211977	0.000595891	3.55731	0.000374669	0.00603636	1.00147	PLCG2	protein_coding
ENSG00000151849.14	-0.00181051	0.000509357	-3.55449	0.000378707	0.00609801	0.998746	CENPJ	protein_coding
ENSG00000148200.16	0.00310869	0.000874663	3.55415	0.000379196	0.00610247	1.00216	NR6A1	protein_coding
ENSG00000124882.3	0.00361973	0.00101865	3.55345	0.000380212	0.00610885	1.00251	EREG	protein_coding
ENSG00000196182.10	0.00295446	0.000831505	3.55315	0.000380652	0.00610885	1.00205	STK40	protein_coding
ENSG00000139436.20	0.00165459	0.000465662	3.55319	0.000380584	0.00610885	1.00115	GIT2	protein_coding
ENSG00000158869.10	0.00300441	0.00084544	3.55367	0.000379901	0.00610885	1.00208	FCER1G	protein_coding
ENSG00000078403.16	-0.00128412	0.000361376	-3.55341	0.000380266	0.00610885	0.99911	MLLT10	protein_coding
ENSG00000226337.3	0.00546913	0.0015395	3.55253	0.000381544	0.00611977	1.0038	AL353616.2	lincRNA
ENSG00000227836.1	-0.00206066	0.000580114	-3.55217	0.000382065	0.00612473	0.998573	AC008850.1	processed_pseudogene
ENSG00000230006.7	-0.00531073	0.00149598	-3.55001	0.000385223	0.00617192	0.996326	ANKRD36BP2	transcribed_unprocessed_pseudogene
ENSG00000269374.1	0.0020301	0.000571883	3.54986	0.00038544	0.00617196	1.00141	AC011497.2	processed_pseudogene
ENSG00000277595.1	0.00267914	0.000754836	3.5493	0.000386264	0.00618172	1.00186	AC007546.1	sense_intronic
ENSG00000088298.12	0.0017509	0.000493349	3.549	0.000386694	0.00618518	1.00121	EDEM2	protein_coding
ENSG00000114480.12	0.0022612	0.00063717	3.54881	0.000386975	0.00618624	1.00157	GBE1	protein_coding
ENSG00000267241.2	0.00616252	0.00173703	3.54774	0.000388546	0.00620604	1.00428	CYP4F10P	unprocessed_pseudogene
ENSG00000078618.21	0.00186354	0.000525283	3.54768	0.000388644	0.00620604	1.00129	NRDC	protein_coding
ENSG00000148843.14	-0.00170482	0.000480612	-3.54719	0.000389369	0.00621417	0.998819	PDCD11	protein_coding
ENSG00000184557.4	0.00443314	0.00124995	3.54667	0.00039013	0.00622288	1.00308	SOCS3	protein_coding
ENSG00000167987.10	0.002749	0.000775198	3.54619	0.000390851	0.00623093	1.00191	VPS37C	protein_coding
ENSG00000261997.1	0.00318898	0.000899322	3.54598	0.000391157	0.00623236	1.00221	AC007336.1	lincRNA
ENSG00000198131.13	-0.00154227	0.000434957	-3.5458	0.00039143	0.00623326	0.998932	ZNF544	protein_coding
ENSG00000106692.14	-0.00203196	0.000573106	-3.54553	0.000391823	0.00623608	0.998593	FKTN	protein_coding
ENSG00000236935.1	-0.00189334	0.000534056	-3.54521	0.000392302	0.00624026	0.998688	AP003774.4	antisense
ENSG00000246363.2	0.00650269	0.00183434	3.54497	0.000392656	0.00624245	1.00452	LINC02458	lincRNA
ENSG00000070371.15	0.00340881	0.000961679	3.54464	0.000393144	0.00624676	1.00237	CLTCL1	protein_coding
ENSG00000271778.1	-0.00440301	0.00124232	-3.54417	0.000393847	0.00625449	0.996953	AC080013.3	sense_intronic
ENSG00000117335.19	0.00248284	0.000700766	3.54304	0.000395538	0.00627535	1.00172	CD46	protein_coding
ENSG00000083444.16	0.00285421	0.000805624	3.54286	0.000395813	0.00627535	1.00198	PLOD1	protein_coding
ENSG00000158417.10	-0.00183835	0.000518871	-3.54298	0.000395631	0.00627535	0.998727	EIF5B	protein_coding
ENSG00000165175.15	0.00288507	0.000814435	3.54241	0.000396483	0.00628252	1.002	MID1IP1	protein_coding
ENSG00000120029.12	-0.00136711	0.000385968	-3.54203	0.000397064	0.00628827	0.999053	ARMH3	protein_coding
ENSG00000028203.17	-0.00177943	0.000502502	-3.54113	0.000398416	0.00630275	0.998767	VEZT	protein_coding
ENSG00000083720.12	-0.00229112	0.000646979	-3.54126	0.000398227	0.00630275	0.998413	OXCT1	protein_coding
ENSG00000140443.14	0.00295786	0.000835974	3.53822	0.000402833	0.00636913	1.00205	IGF1R	protein_coding
ENSG00000225940.6	0.00540081	0.00152649	3.53805	0.000403096	0.00636979	1.00375	C5orf67	protein_coding
ENSG00000212017.2	-0.00389344	0.00110071	-3.53722	0.00040437	0.00638643	0.997305	MIR548U	miRNA
ENSG00000111203.12	-0.00163282	0.000461791	-3.53584	0.000406485	0.0064093	0.998869	ITFG2	protein_coding
ENSG00000179564.3	0.00973903	0.00275429	3.53596	0.000406304	0.0064093	1.00677	LSMEM2	protein_coding
ENSG00000132003.9	0.00347886	0.000983856	3.53595	0.000406318	0.0064093	1.00241	ZSWIM4	protein_coding
ENSG00000247853.2	0.00307468	0.00086962	3.53566	0.000406754	0.00641004	1.00213	AC006064.2	antisense
ENSG00000088543.14	-0.00197938	0.000559931	-3.53505	0.000407702	0.00641447	0.998629	C3orf18	protein_coding
ENSG00000271856.1	-0.00203205	0.000574823	-3.53509	0.000407641	0.00641447	0.998592	LINC01215	lincRNA
ENSG00000023839.11	0.0023604	0.000667687	3.53518	0.000407492	0.00641447	1.00164	ABCC2	protein_coding
ENSG00000198851.9	-0.0029637	0.000838422	-3.53486	0.000407989	0.00641548	0.997948	CD3E	protein_coding
ENSG00000052802.12	-0.00289931	0.000820245	-3.53469	0.000408251	0.0064161	0.997992	MSMO1	protein_coding
ENSG00000266127.1	0.00384024	0.00108668	3.53392	0.000409444	0.00643135	1.00267	ZNF415P1	processed_pseudogene
ENSG00000001630.16	-0.00264366	0.00074816	-3.53354	0.00041003	0.00643355	0.998169	CYP51A1	protein_coding
ENSG00000160563.13	-0.00152404	0.000431302	-3.53359	0.000409959	0.00643355	0.998944	MED27	protein_coding
ENSG00000264968.1	0.00282482	0.000799502	3.53323	0.000410516	0.00643767	1.00196	AC090844.2	lincRNA
ENSG00000256223.5	-0.00259859	0.000735506	-3.53306	0.000410777	0.00643826	0.9982	ZNF10	protein_coding
ENSG00000138674.16	-0.00138912	0.000393195	-3.53291	0.000411015	0.00643849	0.999038	SEC31A	protein_coding
ENSG00000228705.1	0.00309944	0.000877351	3.53273	0.000411296	0.0064394	1.00215	LINC00659	antisense
ENSG00000172062.16	-0.00238518	0.000675242	-3.53234	0.000411898	0.00644532	0.998348	SMN1	protein_coding
ENSG00000245164.6	-0.00286102	0.000810012	-3.53208	0.000412311	0.00644828	0.998019	LINC00861	lincRNA
ENSG00000130023.15	-0.00170802	0.000483619	-3.53174	0.000412838	0.00645303	0.998817	ERMARD	protein_coding
ENSG00000165632.7	-0.00135867	0.000384734	-3.53145	0.000413285	0.00645652	0.999059	TAF3	protein_coding
ENSG00000250548.6	0.00389772	0.00110415	3.53006	0.000415464	0.00648483	1.00271	LINC01303	lincRNA
ENSG00000266317.2	0.00319369	0.000904726	3.53001	0.000415547	0.00648483	1.00222	RN7SL703P	misc_RNA
ENSG00000168040.4	0.00234189	0.000663479	3.52972	0.000416005	0.00648846	1.00162	FADD	protein_coding
ENSG00000221639.1	-0.00198424	0.000562214	-3.52933	0.000416607	0.00649433	0.998626	RF00334	snoRNA
ENSG00000100106.20	0.00239979	0.000680197	3.52807	0.000418594	0.00651476	1.00166	TRIOBP	protein_coding
ENSG00000113318.9	-0.00181607	0.000514728	-3.5282	0.00041839	0.00651476	0.998742	MSH3	protein_coding
ENSG00000241058.3	-0.00178898	0.000507036	-3.52831	0.00041822	0.00651476	0.998761	NSUN6	protein_coding
ENSG00000137941.16	0.0037921	0.001075	3.52752	0.000419466	0.0065248	1.00263	TTLL7	protein_coding
ENSG00000211898.7	-0.00675728	0.00191602	-3.52673	0.000420733	0.00654098	0.995327	IGHD	IG_C_gene
ENSG00000092531.9	0.00229426	0.000650756	3.52553	0.000422644	0.00656715	1.00159	SNAP23	protein_coding
ENSG00000203710.11	0.00346972	0.000984375	3.52479	0.000423814	0.00658178	1.00241	CR1	protein_coding
ENSG00000204131.9	0.00297921	0.000845542	3.52344	0.000425986	0.00661195	1.00207	NHSL2	protein_coding
ENSG00000117322.17	-0.0030033	0.000852555	-3.52271	0.000427166	0.00662671	0.99792	CR2	protein_coding
ENSG00000226791.6	-0.00280085	0.00079516	-3.52237	0.00042771	0.00662801	0.99806	AC109826.1	lincRNA
ENSG00000104381.12	-0.00234692	0.000666278	-3.52244	0.000427598	0.00662801	0.998375	GDAP1	protein_coding
ENSG00000232254.1	0.0055581	0.00157827	3.52165	0.000428874	0.00663252	1.00386	CSF2RBP1	unprocessed_pseudogene
ENSG00000102032.12	0.00225373	0.000639929	3.52184	0.000428565	0.00663252	1.00156	RENBP	protein_coding
ENSG00000059588.9	-0.00202804	0.000575884	-3.52162	0.000428921	0.00663252	0.998595	TARBP1	protein_coding
ENSG00000151743.10	0.00175148	0.000497339	3.52171	0.000428773	0.00663252	1.00121	AMN1	protein_coding
ENSG00000233431.1	0.00434942	0.00123517	3.52132	0.000429401	0.00663283	1.00302	LINC02596	antisense
ENSG00000163220.10	0.00458201	0.00130119	3.5214	0.00042927	0.00663283	1.00318	S100A9	protein_coding
ENSG00000226975.1	0.00539102	0.00153114	3.52092	0.00043006	0.00663946	1.00374	AC006987.1	unprocessed_pseudogene
ENSG00000134900.11	-0.00200674	0.000569994	-3.52063	0.000430526	0.00664309	0.99861	TPP2	protein_coding
ENSG00000129473.9	0.0017872	0.000507663	3.52044	0.00043083	0.00664422	1.00124	BCL2L2	protein_coding
ENSG00000185989.10	-0.00219525	0.000623634	-3.52009	0.000431397	0.00664942	0.99848	RASA3	protein_coding
[truncated: 2,174 more rows]

## Sheet: Replicated genes
	pvalue_Dis	padj_Dis	log2FoldChange_Dis	log2FoldChange_Rep	pvalue_Rep	padj_Rep	symbol	geneType
[truncated: 1,636 more rows]

[truncated: 1 more sheets: GO-BP]
